# Supplementary material for: Dimerisation of the PICTS complex via LC8/Cut-up drives co-transcriptional transposon silencing in Drosophila
Source: eLife. 2021 Feb 4;10:e65557. doi: 10.7554/eLife.65557 (PMC7861614; doi:10.7554/eLife.65557)
Supplement: Figure 1—source data 1. [file elife-65557-fig1-data1.xlsx]

## Sheet: Genes
				Log2 fold change and adjusted p-value reported by DESeq2				RPKM per sample
EnsemblID	Symbol	Hsap_symbol	Biotype	log2FC [sh_panx/sh_w]	padj [sh_panx/sh_w]	log2FC [sh_ctp/sh_w]	padj [sh_ctp/sh_w]	sh_ctp.1	sh_ctp.2	sh_ctp.3	sh_ctp.4	sh_panx.1	sh_panx.2	sh_panx.3	sh_panx.4	sh_w.1	sh_w.2	sh_w.3	sh_w.4
FBgn0265512	mlt	TBCEL,AP000646.1	protein_coding	-0.1133	0.3143	0.3038	0.1552	32.707	40.037	48.631	46.286	22.147	25.134	27.887	20.504	33.819	36.161	31.196	29.462
FBgn0261547	Exn		protein_coding	-0.08397	0.3775	0.5264	1.64e-07	8.318	8.52	10.363	10.439	5.152	5.681	6.741	5.133	6.69	6.161	6.116	6.849
FBgn0036150	Ir68a		protein_coding	0.06608	0.546	2.571	1.683e-07	0.25	0.143	0.228	0.351	0.1	0.031	0.036	0.105	0.012	0.022	0.025	0.095
FBgn0034390	CG15093		protein_coding	0.08811	0.3888	-0.488	0.0002868	62.693	65.964	56.135	66.014	109.245	93.976	114.909	108.522	79.688	91.081	94.089	94.66
FBgn0013771	Cyp6a9		protein_coding	-0.9871	0.0002049	1.683	2.351e-12	12.927	15.514	24.131	17.886	2.644	1.612	3.13	2.371	5.437	4.999	5.704	5.281
FBgn0005564	Shal	KCND3	protein_coding	0.01898	0.9244	2.352	1.365e-22	1.859	2.396	2.946	2.376	0.393	0.36	0.892	0.399	0.451	0.367	0.459	0.58
FBgn0085440	Lgr4		protein_coding	-0.02048	0.8902	2.82	1.395e-05	0.039	0.104	0.146	0.204	0	0.008	0.02	0.016	0.029	0.009	0.01	0.017
FBgn0052944	CG32944		protein_coding	2.013	3.786e-07	2.476	3.01e-11	0.337	0.378	0.302	0.244	0.247	0.174	0.266	0.293	0.045	0.069	0.038	0.065
FBgn0037396	CG11459		protein_coding	0.02065	0.8739	3.392	0.0007107	0.108	0.219	0.197	0.078	0.019	0.018	0	0.033	0	0	0	0.036
FBgn0265929	CR44718		ncRNA	0.09494	0.3745	2.64	0.0006955	0.239	0.138	0.055	0.321	0.048	0.067	0.156	0.042	0.051	0	0	0.046
FBgn0031281	Saf6		protein_coding	-0.01472	0.9529	-0.1946	0.147	10.603	11.57	11.334	10.01	11.854	12.193	11.829	12.682	12.977	12.62	12.31	12.306
FBgn0031098	CG17068		protein_coding	0.04381	0.7251	-0.1315	0.1998	17.765	17.224	18.118	19.312	21.333	21.281	21.779	21.017	19.815	19.801	20.654	19.359
FBgn0037369	CG2100	TRNT1	protein_coding	0.009386	0.9813	-0.3768	0.0002216	27.293	30.109	27.523	26.444	36.068	36.891	38.181	37.308	37.676	37.109	35.981	35.223
FBgn0017545	RpS3A	RPS3A	protein_coding	0.06925	0.3623	0.2093	0.0002798	2179.52	2214.69	2193.59	2199.08	1931.03	2036.77	2133.85	2052.03	1885.71	1891.04	1757.89	2052.39
FBgn0033980	Cyp6a20		protein_coding	0.05403	0.6305	2.494	1.114e-17	5.244	4.514	7.671	5.663	1.426	0.837	1.537	1.461	0.933	0.863	0.855	1.383
FBgn0040370	CG13375		protein_coding	0.8873	0.004546	1.17	6.301e-05	3.499	3.1	3.239	2.546	2.618	3.665	3.648	1.479	0.971	1.125	1.455	1.39
FBgn0039704	neo		protein_coding	0.06691	0.5447	2.316	4.692e-07	0.254	0.309	0.258	0.276	0.09	0.151	0.068	0.039	0.038	0.054	0	0.111
FBgn0022774	Oat	OAT	protein_coding	0.02231	0.9085	1.952	4.515e-23	92.313	130.848	76.501	126.018	36.484	34.127	23.932	23.717	33.56	17.279	22.712	35.526
FBgn0261999	CG42817		protein_coding	0.04036	0.7473	5.345	1.813e-60	3.62	5.049	8.598	6.457	0.139	0.241	0.174	0.167	0.127	0.084	0.093	0.255
FBgn0032136	Apoltp		protein_coding	0.0506	0.6513	4.428	1.688e-19	0.68	1.208	1.852	0.796	0.069	0.106	0.044	0.084	0.041	0.07	0.059	0.027
FBgn0040005	CG17883	TBC1D20	protein_coding	-0.006975	0.993	-0.6186	2.637e-05	40.761	37.586	45.063	40.618	67.607	68.97	57.573	60.715	60.646	65.323	68.766	65.086
FBgn0036110	Cpr67Fb		protein_coding	-0.1458	0.2458	0.3266	0.4018	0.251	0.085	0.068	0.302	0	0	0.064	0	0.062	0.179	0.066	0.112
FBgn0011589	Elk		protein_coding	0.004912	1	4.274	2.118e-15	0.414	0.543	0.839	0.584	0	0.047	0.038	0.035	0.021	0.036	0.011	0.043
FBgn0264502	CG43901		protein_coding	0.1562	0.2393	0.5611	0.04231	0.364	0.316	0.331	0.392	0.144	0.288	0.591	0.368	0.229	0.204	0.179	0.224
FBgn0083979	Ir10a		protein_coding	0.007565	0.9745	0.07414	0.8835	0	0.022	0.017	0.015	0.015	0	0.016	0.026	0	0	0.017	0.029
FBgn0032981	CG3635		protein_coding	0.01099	0.9605	2.192	0.0003316	0.028	0.308	0.224	0.18	0	0.073	0.063	0.034	0.041	0.02	0.022	0.056
FBgn0035799	CG14838		protein_coding	-0.01401	0.9333	4.814	4.007e-08	0.109	0.22	0.388	0.157	0	0	0.008	0.007	0	0.008	0	0.015
FBgn0034725	CG6044		protein_coding	0.03021	0.8291	1.78	1.373e-07	0.995	1.101	1.238	0.987	0.278	0.38	0.511	0.31	0.293	0.198	0.219	0.482
FBgn0050076	CG30076		protein_coding	0.000632	1	5.037	3.74e-45	1.923	2.752	4.742	3.611	0.059	0.082	0.127	0.115	0.078	0.149	0.116	0.042
FBgn0022981	rpk		protein_coding	-0.03424	0.8183	-1.213	4.963e-19	55.181	45.845	43.349	38.133	102.04	100.429	102.184	93.617	103.908	112.294	110.767	104.994
FBgn0035608	blanks		protein_coding	2.117	8.61e-05	9.61	3.427e-95	162.377	110.406	117.674	120.621	0.576	1.011	0.712	0.624	0.112	0.086	0.095	0.263
FBgn0260480	CG32295		protein_coding	-0.01397	0.9337	1.033	0.08132	0.033	0	0.053	0.165	0	0.021	0.025	0	0	0.023	0	0.044
FBgn0036752	Adgf-A	ADA2	protein_coding	-0.001368	1	1.842	1.952e-06	23.047	21.168	24.249	27.414	5.967	7.672	6.034	5.218	4.874	5.501	6.499	8.293
FBgn0051619	nolo		protein_coding	0.06196	0.5761	0.5048	0.03638	0.197	0.172	0.212	0.327	0.074	0.181	0.24	0.279	0.098	0.145	0.186	0.167
FBgn0033486	dmpd		protein_coding	-0.01504	0.9485	-0.4971	0.05075	31.221	28.393	28.597	26.56	43.012	40.547	37.793	41.812	45.653	46.047	46.897	39.578
FBgn0032956	Cul2	CUL2	protein_coding	-0.03998	0.7709	-0.5527	1.765e-06	40.188	32.319	38.562	36.471	56.114	51.589	49.083	46.694	52.055	56.081	59.086	53.041
FBgn0041630	Hexo1	HEXB	protein_coding	-0.01026	0.9707	0.04926	0.8508	16.791	24.637	21.757	18.45	17.613	19.121	18.895	19.049	21.495	19.933	19.106	17.778
FBgn0053547	Rim		protein_coding	0.04348	0.6937	3.009	1.073e-06	0.032	0.03	0.037	0.037	0.004	0.005	0.008	0.01	0.004	0.006	0.002	0.004
FBgn0038680	Cyp12a5		protein_coding	0.0139	0.9513	2.981	7.416e-19	0.882	1.404	1.651	1.716	0.208	0.097	0.208	0.269	0.172	0.195	0.182	0.155
FBgn0000566	Eip55E	CTH	protein_coding	0.01502	0.9515	-0.4597	0.0007298	64.44	72.899	61.994	64.27	91.924	93.463	103.918	94.989	94.712	91.707	86.683	97.189
FBgn0035333	CG1317	MARCH6	protein_coding	0.001096	1	0.1649	0.6002	25.184	27.34	31.881	29.93	23.957	23.822	24.093	24.994	24.944	23.364	23.349	24.339
FBgn0267794	CR43174		ncRNA	0.1195	0.2989	4.426	2.603e-08	0.398	0.202	0.242	0.662	0.056	0.039	0.045	0.061	0.015	0.014	0	0.027
FBgn0266452	CTPsyn	CTPS1,CTPS2	protein_coding	0.08568	0.3032	0.165	0.03888	52.045	52.546	51.756	47.54	47.535	51.548	53.722	48.566	42.986	45.306	44.235	48.811
FBgn0004583	ex		protein_coding	0.08332	0.4453	1.304	8.627e-10	4.384	4.23	5.803	5.58	1.905	2.494	3.38	2.237	1.536	1.86	1.865	2.49
FBgn0262886	CR43241		ncRNA	-0.01541	0.95	0.4625	0.01333	7.387	8.875	10.015	8.798	5.603	5.057	6.037	6.363	5.929	5.897	5.924	6.656
FBgn0029728	CG2861		protein_coding	0.1196	0.32	3.954	4.307e-13	0.659	0.598	0.614	0.935	0.084	0.057	0.133	0.091	0.074	0.035	0.02	0.038
FBgn0030246	CG1582	DHX57	protein_coding	0.01203	0.9607	-0.04699	0.8504	30.782	30.239	30.268	30.009	33.544	32.444	33.349	33.352	29.066	33.886	31.946	31.186
FBgn0001134	Grd		protein_coding	-0.03194	0.757	1.261	0.07132	0	0.019	0.008	0.041	0	0	0	0	0	0.007	0.007	0
FBgn0037832	Desi		protein_coding	0.08241	0.4153	1.824	0.03331	0	0	0	0.138	0	0.025	0.029	0.046	0	0	0	0
FBgn0264566	CG43938		protein_coding	0	1	1.389	0.06927	0	0	0.042	0.037	0	0	0	0	0	0	0	0
FBgn0000116	Argk	CKMT1B,CKM,CKMT2,CKMT1A,CKB	protein_coding	0.03625	0.7939	1.487	9.2e-12	242.502	285.547	316.521	308.401	115.912	110.415	123.434	109.124	96.446	102.193	92.808	107.011
FBgn0038964	Nop56		protein_coding	0.184	0.01744	0.1895	0.01702	191.02	200.206	168.646	178.538	176.274	200.558	204.466	188.515	164.117	160.384	149.28	171.703
FBgn0035287	CG13937		protein_coding	0.121	0.3167	4.613	7.17e-49	5.372	9.079	11.848	9.19	0.338	0.515	0.743	0.629	0.384	0.273	0.242	0.501
FBgn0261811	pico		protein_coding	0.06001	0.5525	-0.1731	0.05505	34.363	34.156	35.954	34.111	39.841	40.206	45.299	45.388	38.211	39.372	40.12	39.082
FBgn0266046	CR44811		ncRNA	0.04424	0.6544	5.844	3.874e-11	0.621	1.667	1.56	1.639	0.022	0.102	0.024	0.019	0	0.022	0	0.042
FBgn0034758	CG13510		protein_coding	-0.03694	0.7902	2.46	9.449e-30	21.81	26.832	32.563	32.957	3.851	5.042	5.246	3.713	5.293	4.741	4.546	5.998
FBgn0034759	CG13511		protein_coding	-0.03694	0.7902	2.46	9.449e-30	21.81	26.832	32.563	32.957	3.851	5.042	5.246	3.713	5.293	4.741	4.546	5.998
FBgn0260767	CG42565		protein_coding	-0.03694	0.7902	2.46	9.449e-30	21.81	26.832	32.563	32.957	3.851	5.042	5.246	3.713	5.293	4.741	4.546	5.998
FBgn0051973	Cda5		protein_coding	0.05143	0.647	2.537	8.668e-08	1.385	1.263	1.88	1.419	0.21	0.303	0.597	0.367	0.211	0.195	0.255	0.319
FBgn0029532	CG13361		protein_coding	-0.07027	0.4785	0.2328	0.538	0.049	0	0.099	0.071	0.017	0.016	0.019	0	0.018	0.035	0	0.098
FBgn0046253	CG3502		protein_coding	0.8798	0.01579	2.851	5.186e-08	0.205	0.183	0.225	0.375	0.085	0.119	0.193	0.073	0.009	0.043	0.029	0.049
FBgn0033015	d4		protein_coding	-0.005367	1	-0.9326	3.354e-12	44.234	37.655	36.698	35.107	83.239	80.818	64.857	68.466	70.19	77.017	79.981	74.155
FBgn0032026	CG7627		protein_coding	-0.0401	0.77	-0.7172	3.104e-10	95.339	77.803	89.952	79.472	129.447	125.441	145.977	129.911	134.993	144.54	141.129	153.592
FBgn0028888	CG4168		protein_coding	0.01624	0.9321	1.401	0.006983	0.019	0.032	0.025	0.05	0.004	0.017	0.014	0.011	0	0.013	0.02	0.004
FBgn0034389	Mctp		protein_coding	-0.0799	0.4716	-0.8066	0.000631	7.9	7.082	7.994	6.483	13.085	9.591	9.017	10.339	13.22	14.382	15.461	13.455
FBgn0263934	esn	PRICKLE2	protein_coding	-0.08628	0.4508	2.582	1.219e-11	0.294	0.368	0.46	0.563	0.045	0.055	0.034	0.031	0.043	0.055	0.106	0.073
FBgn0037796	CG12814		protein_coding	0.1302	0.3011	2.695	1.535e-10	2.837	3.49	5.226	3.737	0.636	0.852	1.139	1.495	0.352	0.544	0.41	0.973
FBgn0260943	Rbp6	MSI2	protein_coding	-0.01786	0.9275	3.556	1.315e-22	0.593	0.721	1.105	1.028	0.059	0.058	0.075	0.057	0.071	0.065	0.052	0.095
FBgn0262620	CR43144		ncRNA	-1.636	5.057e-11	-0.934	2.526e-05	5.376	8.097	7.349	5.974	4.04	4.241	3.43	4.787	13.812	15.05	13.426	12.95
FBgn0000635	Fas2		protein_coding	0.11	0.3329	3.847	3.06e-52	32.598	39.081	59.243	50.91	3.546	4.686	5.132	4.124	2.596	2.934	2.298	4.589
FBgn0034997	CG3376	SMPD1	protein_coding	-0.01055	0.9667	-0.8058	0.007538	8.929	8.102	7.625	7.344	16.153	15.773	14.747	14.19	14.668	17.378	17.595	16.169
FBgn0266769	CR45234		ncRNA	0.02582	0.8154	0	1	0	0	0	0	0	0	0	0.061	0	0	0	0
FBgn0020414	Idgf3		protein_coding	0.06623	0.5468	3.481	2.509e-44	6.45	10.673	15.018	10.296	1.033	1.507	1.415	0.901	0.979	0.91	0.641	1.208
FBgn0011586	e(r)	ERH	protein_coding	-0.01709	0.9428	0.07728	0.3213	81.886	81.63	85.583	79.457	83.421	74.897	67.574	78.501	76.902	78.777	79.166	76.261
FBgn0030608	Lsd-2		protein_coding	0.009354	0.981	-0.1549	0.2496	143.143	98.565	119.376	132.196	137.014	136.381	152.591	138.622	132.115	137.743	136.883	146.115
FBgn0263581	CR43606		ncRNA	-0.03173	0.7593	0.58	0.2791	0.03	0.06	0.024	0.021	0	0	0	0	0.022	0	0	0.02
FBgn0015527	peng		protein_coding	-0.02456	0.8879	-0.06092	0.4231	84.804	80.882	72.238	77.355	73.097	80.617	87.806	77.845	83.345	81.747	80.686	83.248
FBgn0036373	Tgi		protein_coding	0.01677	0.9448	0.9802	1.422e-09	40.064	42.341	49.416	55.264	24.678	23.776	23.953	23.638	20.64	22.468	26.695	21.469
FBgn0020251	sfl		protein_coding	0.02345	0.908	0.35	0.002027	10.195	10.336	12.22	10.29	7.96	9.127	9.696	8.192	7.903	8.51	8.438	8.54
FBgn0264702	CR43971		ncRNA	-0.007575	0.986	0.2049	0.4665	1.593	1.152	1.586	0.921	0.869	0.838	1.283	1.109	0.712	1.493	1.15	0.947
FBgn0033141	CG12831		protein_coding	0.05019	0.5906	0.28	0.5929	0	0	0.009	0	0	0.021	0	0	0	0	0	0
FBgn0036713	Mip		protein_coding	0.07998	0.4261	0.9321	0.131	0	0.083	0.022	0.059	0.019	0.054	0.063	0.033	0	0.02	0	0.018
FBgn0030237	CG15209		protein_coding	0.06309	0.5702	4.99	5.621e-57	28.471	39.449	44.643	54.821	1.538	1.493	1.621	2.384	1.26	1.379	0.611	1.818
FBgn0021995	Rs1	DDX27	protein_coding	0.1712	0.01255	0.143	0.04176	54.685	57.144	49.997	53.636	53.185	58.11	63.376	53.437	51.279	48.922	45.287	49.251
FBgn0013773	Cyp6a22		protein_coding	-0.03595	0.7975	-1.128	3.045e-09	24.601	20.797	18.185	18.638	43.456	44.046	34.718	44.038	47.902	48.788	48.159	43.26
FBgn0039994	conu		protein_coding	-0.04125	0.7604	-0.904	2.135e-15	56.041	42.578	47.848	41.34	91.764	87.777	74.539	76.53	81.291	91.282	97.169	88.632
FBgn0012034	AcCoAS	ACSS2	protein_coding	-0.1133	0.3153	-0.2835	0.1907	17.457	20.662	18.62	14.835	15.558	15.862	17.617	16.979	21.335	21.984	26.334	20.781
FBgn0034897	Sesn		protein_coding	-0.1289	0.2655	-0.1574	0.4773	18.812	22.066	27.826	25.304	22.293	18.65	17.37	19.057	25.574	27.736	26.934	26.753
FBgn0259188	Ir7f		protein_coding	0.2001	0.1848	3.91	0.0002361	0.058	0.039	0.047	0.084	0.014	0.013	0.029	0.023	0	0	0	0
FBgn0000008	a		protein_coding	0.04063	0.7493	0.2858	0.2488	8.037	6.772	7.867	9.138	6.483	7.758	8.712	7.199	5.964	5.934	5.873	6.971
FBgn0267585	CR45923		ncRNA	-0.08027	0.4774	-1.327	0.001691	1.346	1.419	0.999	1.763	2.577	3.335	2.221	1.707	3.403	4.239	5.047	4.197
FBgn0026196	nop5	NOP58	protein_coding	0.05384	0.6374	-0.1837	0.1783	242.146	233.722	200.942	223.541	266.819	295.361	326.603	266.55	240.101	258.071	259.048	273.916
FBgn0011288	Snap25	SNAP25,SNAP23	protein_coding	0.2613	0.126	2.958	1.906e-07	0.201	0.187	0.299	0.218	0.047	0.11	0.102	0.061	0.025	0.012	0.026	0.045
FBgn0030027	CG1632		protein_coding	0.06444	0.5602	0.6539	0.03655	1.209	0.581	0.965	1.159	0.285	0.654	1.242	0.916	0.46	0.569	0.389	0.65
FBgn0051217	modSP		protein_coding	-2.012	2.888e-18	1.008	2.103e-07	3.808	5.159	8.16	4.443	0.744	0.593	0.611	0.488	3.085	1.704	2.968	2.411
FBgn0024222	IKKbeta	IKBKB	protein_coding	-0.08954	0.3855	-0.2732	0.06207	17.826	17.288	19.372	18.384	22.608	20.093	15.339	16.507	22.581	21.912	24.054	20.865
FBgn0053181	CG33181	SLC41A2,SLC41A1	protein_coding	0.02847	0.859	-0.4558	0.017	26.171	19.114	20.748	21.127	35.255	34.346	34.647	34.379	30.12	31.829	29.542	33.441
FBgn0284223	CG46307		protein_coding	0.01841	0.9351	1.447	2.266e-15	6.555	8.026	12.708	8.9	2.991	3.441	3.659	3.719	2.958	3.076	2.939	3.994
FBgn0004870	bab1		protein_coding	1.342	0.003334	4.636	1.19e-22	0.487	0.899	0.888	0.947	0.152	0.132	0.12	0.061	0.027	0.046	0.04	0.01
FBgn0004362	HmgD		protein_coding	-0.03772	0.7721	-0.4661	1.018e-10	266.845	259.087	261.411	236.335	361.053	339.859	331.184	323.042	332.734	367.169	368.687	353.882
FBgn0030067	Rbm13	MAK16	protein_coding	0.0426	0.7342	-0.3455	0.0001214	55.123	55.563	46.898	55.474	69.589	72.571	74.835	73.761	70.493	66.715	66.036	69.328
FBgn0051373	CG31373	PDF	protein_coding	-0.01528	0.9501	-0.2281	0.2667	7.795	14.069	11.17	9.813	10.315	12.306	12.688	13.175	13.705	14.222	10.889	12.641
FBgn0030789	Rrp45	EXOSC9	protein_coding	0.01164	0.9659	-0.4073	2.067e-09	26.534	24.823	24.807	23.929	33.627	33.497	34.051	34.012	32.746	34.508	33.697	32.33
FBgn0032780	CG13085		protein_coding	-0.03772	0.7721	0.3971	0.1149	0.694	1.108	1.124	1.003	0.642	0.526	0.366	0.715	0.636	0.78	0.632	0.717
FBgn0264703	CR43972		pseudogene	0.05808	0.5998	0.8002	0.01666	0.839	0.708	0.755	0.825	0.544	0.567	0.586	0.482	0.486	0.316	0.313	0.344
FBgn0034496	CG9143	DDX24	protein_coding	0.07224	0.4307	-0.2391	0.003995	35.354	31.982	29.008	29.995	39.286	43.28	41.914	40.065	36.751	37.454	37.532	37.904
FBgn0037427	Osi17		protein_coding	0.009148	0.9686	0.4357	0.297	0.019	0.038	0.008	0.034	0.013	0.012	0.021	0.011	0.007	0.02	0.015	0.006
FBgn0266691	CR45181		ncRNA	-0.002374	1	2.157	0.003275	0.337	0.341	0.491	0.292	0	0.133	0.103	0	0	0.144	0	0.09
FBgn0000719	fog		protein_coding	-0.03345	0.8033	0.3162	0.2547	14.189	15.783	23.303	17.794	9.748	10.235	12.489	10.244	11.951	12.938	13.446	14.222
FBgn0052772	CG32772		protein_coding	0.001448	1	-0.1775	0.515	27.779	27.588	31.684	26.735	35.12	33.12	32.593	34.405	30.581	35.264	35.359	32.839
FBgn0050104	NT5E-2	NT5E	protein_coding	1.005	0.0008105	4.097	7.914e-49	43.649	51.577	67.886	69.751	5.653	7.984	10.06	7.181	3.356	2.963	2.592	4.395
FBgn0263345	CR43426		ncRNA	0.09139	0.4247	0.4817	0.08218	0.392	0.347	0.41	0.52	0.485	0.322	0.398	0.398	0.402	0.128	0.232	0.307
FBgn0043854	slam		protein_coding	0.001777	1	-2.591	4.374e-20	5.396	3.724	3.822	3.404	26.235	26.178	24.958	23.486	23.336	24.808	27.115	24.608
FBgn0045761	CHKov1		protein_coding	0.03376	0.8008	2.974	4.808e-16	8.703	10.532	16.049	12.525	1.035	2.079	2.887	1.48	1.401	1.081	1.259	2.176
FBgn0031258	CG4297		protein_coding	-0.03231	0.8163	0.6133	0.01584	2.199	2.407	3.4	2.591	0.795	1.427	1.798	1.203	1.517	1.58	1.319	1.813
FBgn0024364	CG11417	ESF1	protein_coding	-0.01079	0.9726	-0.7906	2.438e-21	42.866	38.967	35.509	38.614	66.53	69.763	71.566	60.383	67.531	72.249	64.195	68.589
FBgn0010247	Parp	PARP1	protein_coding	-0.04122	0.7478	-1.107	1.301e-06	18.294	18.748	24.177	20.133	41.546	36.498	40.91	39.054	43.024	45.781	48.621	50.374
FBgn0043070	MESK2	NDRG4,NDRG2,NDRG3,NDRG1	protein_coding	-0.006393	0.9972	0.191	0.184	24.587	30.046	32.935	28.503	22.916	24.02	24.447	27.732	25.622	26.104	25.265	23.715
FBgn0032297	CG17124	PPP1R14B	protein_coding	0.3976	0.04348	3.317	2.418e-40	17.576	18.38	20.219	28.951	2.37	4.154	4.094	3.708	2.124	1.752	1.313	3.221
FBgn0037817	Cyp12e1		protein_coding	-0.09821	0.4003	3.802	5.494e-30	2.406	4.371	6.344	4.91	0.284	0.248	0.126	0.115	0.246	0.336	0.41	0.269
FBgn0028902	Tektin-A		protein_coding	0	1	0	1	0	0	0	0	0	0	0	0	0	0	0	0
FBgn0028903	CG13243		protein_coding	-0.0149	0.9223	-0.1205	0.8213	0	0	0	0	0	0	0	0	0.019	0	0	0
FBgn0031905	gudu	ARMC4	protein_coding	-0.002171	1	0.774	0.1435	0.034	0.052	0.028	0.012	0	0.011	0.026	0	0	0.024	0.013	0
FBgn0260456	CG4806	RBM28	protein_coding	0.09427	0.2713	-0.2081	0.01894	41.356	34.096	37.321	36.343	46.339	50.973	52.778	45.283	40.086	43.346	43.498	45.99
FBgn0035760	CG8607		protein_coding	-0.007474	0.9918	-0.4892	0.0002763	17.41	14.557	13.398	15.217	21.463	20.771	21.561	21.504	22.373	21.78	20.999	21.701
FBgn0029989	CG15333		protein_coding	0.08636	0.4001	3.715	0.0004413	0.126	0.042	0.017	0.045	0	0.028	0.032	0	0	0	0	0
FBgn0050409	CR30409		pseudogene	0.2564	0.1204	1.174	4.777e-05	1.871	3.962	2.481	3.167	1.745	1.985	2.204	2.098	1.235	1.122	1.176	1.057
FBgn0259171	Pde9		protein_coding	0.1725	0.1565	2.513	1.807e-42	1.764	1.469	2.081	2.546	0.394	0.501	0.512	0.478	0.334	0.322	0.307	0.406
FBgn0030247	CG15208		protein_coding	0.02611	0.8155	0.2745	0.598	0	0	0	0.031	0.03	0	0.016	0	0	0	0.017	0
FBgn0010113	hdc		protein_coding	-0.01389	0.9515	0.1757	0.486	11.889	13.792	17.698	14.014	11.528	11.949	11.03	11.246	11.915	12.552	12.595	12.146
FBgn0037065	CG12974		protein_coding	0.02444	0.873	1.364	0.00124	0.125	0.3	0.215	0.327	0.088	0.113	0.095	0.104	0.023	0.056	0.074	0.157
FBgn0038258	CG7362		protein_coding	0.06023	0.5704	0.04079	0.9274	0.058	0.044	0.07	0.021	0.092	0.095	0.11	0.044	0.054	0.041	0.034	0.048
FBgn0267347	squ		protein_coding	0.04353	0.7353	-1.478	1.925e-35	24.914	20.232	21.697	22.118	73.205	70.714	62.768	65.877	61.247	64.762	61.006	63.025
FBgn0036838	CG3808	TRMT2A	protein_coding	-0.04032	0.7658	-0.5447	4.584e-08	23.908	18.759	21.715	19.868	28.233	27.815	33.049	27.151	28.735	32.311	31.524	31.884
FBgn0034215	Mtap	MTAP	protein_coding	-0.05485	0.6294	-0.3307	0.01901	51.501	59.241	45.44	48.426	54.766	55.198	56.487	64.496	78.512	60.128	60.781	62.211
FBgn0031062	CG14230		protein_coding	-0.01583	0.9514	-0.7376	8.708e-16	32.797	29.72	25.499	29.051	50.7	47.6	47.879	46.395	50.64	51.077	49.668	46.208
FBgn0038149	GILT1		protein_coding	-0.02072	0.9238	-0.09987	0.3461	259.464	323.835	298.357	263.199	306.944	284.857	263.107	332.909	326.832	311.248	311.746	280.102
FBgn0040297	Nhe2		protein_coding	0.007586	0.9894	1.623	5.994e-17	4.708	5.871	9.511	6.471	1.864	2.198	2.336	2.321	1.932	2.042	1.839	2.664
FBgn0039929	CG11076		protein_coding	0.01168	0.9667	-0.4049	1.072e-08	114.652	104.013	96.486	99.447	144.572	138.453	144.913	131.972	127.994	142.609	142.682	138.266
FBgn0036301	CG4069	KLHDC4	protein_coding	0.06038	0.5515	-0.1476	0.1124	45.036	44.922	36.305	38.133	45.066	52.181	54.448	47.328	45.571	45.369	44.188	47.367
FBgn0085400	CG34371		protein_coding	-0.3658	0.07584	2.861	4.547e-15	7.926	12.764	18.914	14.241	0.864	1.052	0.971	0.647	1.508	1.776	2.003	1.934
FBgn0266657	CR45164		ncRNA	0.7039	0.01579	2.295	1.68e-11	1.918	2.104	2.654	2.079	0.678	1.103	1.218	0.973	0.417	0.456	0.505	0.376
FBgn0003997	hid		protein_coding	0.05113	0.6513	2.633	1.523e-09	14.502	15.706	18.41	18.716	3.029	3.928	5.112	3.123	2.105	2.79	2.63	2.939
FBgn0265194	Trpm		protein_coding	0.04659	0.706	0.457	0.0003287	14.693	13.654	15.491	17.916	11.328	11.492	14.257	11.733	10.078	11.213	11.183	11.699
FBgn0033446	CG1648		protein_coding	0.01528	0.9433	3.456	9.863e-17	54.716	104.046	119.718	82.588	7.553	10.712	7.086	10.601	9.314	7.144	7.24	7.882
FBgn0041087	wun2		protein_coding	-0.008238	0.9808	-0.5763	0.05488	25.853	24.567	23.621	22.85	43.163	39.72	35.55	40.668	40.852	44.134	41.694	43.161
FBgn0028646	aralar1	SLC25A12	protein_coding	0.001807	1	-0.6554	1.11e-08	29.208	26.88	28.196	28.178	45.619	43.598	47.031	44.986	43.877	47.112	46.294	43.271
FBgn0267791	HnRNP-K	HNRNPK	protein_coding	0.229	0.002492	0.4555	2.078e-10	71.978	78.334	71.976	79.194	64.141	67.798	66.81	67.222	54.093	55.128	51.664	57.699
FBgn0265137	Spn42Da		protein_coding	0.03375	0.8183	0.2697	0.002456	13.859	16.169	16.517	14.218	12.542	13.232	13.785	13.192	12.865	12.741	12.848	11.686
FBgn0014032	Sptr	SPR	protein_coding	0.001553	1	-0.4083	0.08145	33.083	35.159	30.895	31.579	50.087	46.882	40.654	49.091	49.352	46.957	46.495	42.43
FBgn0035334	CG8993	TXN2	protein_coding	-0.0145	0.9558	0.4358	6.335e-06	75.849	104.456	75.881	91.932	63.261	57.001	57.32	70.793	66.288	64.417	63.674	60.35
FBgn0027903	CG12018	POLD2	protein_coding	-0.1135	0.2745	-0.7232	7.429e-07	31.564	39.106	25.504	27.757	41.724	37.439	37.178	53.767	66.312	51.988	50.267	42.685
FBgn0033538	CG11883		protein_coding	0.01009	0.9746	-0.5657	5.22e-05	9.169	8.377	10.026	8.723	13.76	13.435	15.154	14.269	12.753	13.245	13.713	15.45
FBgn0003076	Pgm		protein_coding	-0.01311	0.9605	-1.037	2.741e-09	48.877	65.625	51.111	45.213	105.384	103.865	103.128	119.95	129.584	104.442	108.804	108.755
FBgn0030114	CG17754	KLHL5	protein_coding	-0.04307	0.7393	0.4175	0.005393	25.729	31.766	33.742	31.255	18.926	19.438	20.056	21.715	21.538	23.551	22.971	21.486
FBgn0034418	CG15118	ANKRD13D,ANKRD13A,ANKRD13B	protein_coding	0.02185	0.9107	0.3655	3.411e-08	37.339	41.248	43.479	42.544	32.614	32.379	33.219	32.518	31.055	31.87	33.606	30.793
FBgn0035204	CG2277	NT5DC1	protein_coding	-0.05839	0.588	-0.5558	1.473e-07	16.833	16.336	16.049	15.546	24.001	22.63	18.383	22.322	25.494	23.896	25	22.206
FBgn0043025	Adgf-A2	ADA2	protein_coding	0.03601	0.7746	2.821	8.471e-08	1.06	0.932	1.118	1.331	0.113	0.25	0.305	0.195	0.104	0.071	0.19	0.228
FBgn0036764	CG5535		protein_coding	0.01686	0.9403	-0.5799	0.008051	40.666	36.81	37.762	36.016	57.725	67.16	68.709	68.966	61.862	60.032	56.208	64.856
FBgn0262814	CG43185		protein_coding	-0.0152	0.921	0.5301	0.3287	0.071	0	0.057	0.051	0	0	0	0	0	0.05	0	0
FBgn0052816	CG32816		protein_coding	0.04904	0.6735	0.8822	0.00578	19.006	16.767	22.196	17.541	9.52	15.492	14.639	7.683	7.74	7.243	10.592	8.729
FBgn0032147	IP3K1		protein_coding	0.2423	0.03606	0.2912	0.0241	17.54	17.318	18.952	17.634	18.428	18.075	19.575	19.652	12.398	15.541	14.529	15.206
FBgn0036202	CG6024		protein_coding	0.03045	0.8305	2.224	5.162e-15	0.712	0.53	0.512	0.646	0.144	0.124	0.194	0.142	0.146	0.114	0.103	0.141
FBgn0053284	CG33284		protein_coding	-0.01485	0.9228	-0.1203	0.8219	0	0	0	0	0	0	0	0	0	0	0.027	0
FBgn0015519	nAChRalpha3		protein_coding	-0.02538	0.8718	3.377	3.782e-30	0.586	0.667	0.87	0.892	0.039	0.055	0.103	0.049	0.068	0.078	0.06	0.078
FBgn0035868	CG7194		protein_coding	0.07199	0.5113	2.529	2.766e-31	23.557	23.796	31.566	31.019	4.854	6.463	5.933	6.669	4.673	4.076	4.314	5.831
FBgn0030262	Vago		protein_coding	-0.02737	0.8504	2.935	1.256e-16	1.105	4.572	3.074	2.569	0.102	0.474	0.512	0.088	0.358	0.445	0.493	0.161
FBgn0001234	Hsromega		ncRNA	0.1169	0.2591	1.396	1.089e-21	3.101	3.137	4.149	4.004	1.241	1.549	2.105	1.788	1.129	1.11	1.522	1.619
FBgn0262731	CG33941		protein_coding	-0.1494	0.1642	-1.3	2.267e-19	18.514	22.123	25.919	20.51	44.528	43.507	37.862	46.025	52.566	54.14	57.253	54.801
FBgn0003326	sca		protein_coding	1.084	0.02863	7.232	8.186e-13	0.453	0.367	1.004	0.626	0.021	0.046	0.038	0.012	0	0	0.008	0
FBgn0013563	Pex1		protein_coding	-0.006824	0.993	-0.5578	0.001418	12.457	10.497	10.47	10.912	17.316	16.124	16.804	16.259	17.972	16.838	17.638	15.624
FBgn0036018	CG3335	RBM19	protein_coding	0.02057	0.9242	-0.3902	0.0002907	25.285	20.231	23.491	20.828	29.843	32.11	34.301	27.508	26.733	30.432	29.369	32.518
FBgn0085265	CG34236		protein_coding	-0.01477	0.9228	1.062	0.1144	0.04	0.041	0.098	0	0	0	0	0	0	0	0.032	0
FBgn0052082	IRSp53		protein_coding	0.3175	0.06886	3.64	7.996e-53	3.87	6.325	8.078	6.011	0.588	0.977	0.977	0.581	0.364	0.463	0.501	0.592
FBgn0033431	CG1827	AGA	protein_coding	-0.274	0.06886	0.6069	0.001034	10.236	18.852	17.44	14.922	5.788	6.71	7.082	6.355	9.747	11.124	8.579	8.922
FBgn0020415	Idgf2		protein_coding	-0.266	0.09134	1.702	4.401e-13	26.547	27.851	36.478	28.207	6.49	6.941	4.737	4.732	8.752	10.994	7.616	8.434
FBgn0243586	Tb		protein_coding	-0.03178	0.7589	0.2393	0.6292	0.037	0	0	0.054	0	0	0	0	0	0	0.059	0
FBgn0023000	mth		protein_coding	-0.08561	0.3984	0.6028	1.3e-06	16.969	17.598	20.301	22.75	9.744	10.822	10.726	11.43	11.696	12.081	12.502	13.771
FBgn0031126	Cyp6v1		protein_coding	0.03553	0.8044	-0.4786	2.751e-07	51.59	49.654	48.624	44.745	73.693	69.797	71.861	74.618	68.055	71.939	67.664	66.221
FBgn0041789	Pax		protein_coding	0.01687	0.9452	1.472	3.053e-24	43.589	58.631	77.17	65.26	22.812	24.147	22.341	21.664	20.256	22.706	21.774	22.293
FBgn0086912	mbm		protein_coding	-0.01161	0.9697	-0.8286	7.597e-17	47.793	40.237	37.767	43.015	72.443	75.847	78.573	71.28	70.475	79.953	75.402	78.484
FBgn0003423	slgA	AC007325.2,PRODH	protein_coding	-0.05831	0.5856	0.05377	0.6551	64.719	65.614	65.326	67.801	55.487	53.007	62.347	59.129	65.007	62.603	61.225	64.599
FBgn0034299	CG5757	DTYMK	protein_coding	-0.02458	0.8974	-0.5909	1.857e-10	54.068	47.712	41.896	42.98	64.855	67.99	69.434	70.75	71.881	68.357	76.462	67.486
FBgn0028523	CG5888		protein_coding	-0.04763	0.6854	2.477	1.245e-21	2.558	4.318	5.527	4.095	0.302	0.934	0.557	0.544	0.756	0.753	0.93	0.504
FBgn0053252	CG33252		protein_coding	0	1	0	1	0	0	0	0	0	0	0	0	0	0	0	0
FBgn0005775	Con		protein_coding	0.1891	0.1934	5.103	1.22e-53	0.874	1.159	1.787	1.492	0.05	0.068	0.069	0.086	0.038	0.041	0.02	0.047
FBgn0283479	Alp1		protein_coding	-0.0123	0.9505	2.904	0.0001003	0.212	0.064	0.206	0.184	0.015	0.014	0.016	0.013	0	0	0.067	0.014
FBgn0034145	CG5065	FAR1,FAR2	protein_coding	0.0699	0.526	1.759	0.000299	7.462	5.117	10.562	11.437	1.634	3.789	5.505	4.357	1.985	2.065	1.341	3.496
FBgn0263005	CG43313	CHPF,CHPF2	protein_coding	-0.002173	1	-0.6195	3.178e-10	22.785	20.163	19.999	19.217	31.713	30.189	33.214	32.324	31.062	32.606	32.268	31.989
FBgn0014010	Rab5	AC099811.2,RAB5C	protein_coding	0.02124	0.9212	0.4296	6.719e-05	83.774	83.424	99.465	95.45	66.902	67.454	72.046	70.063	63.739	66.568	67.205	68.053
FBgn0285896	btl		protein_coding	0.001867	1	1.325	2.013e-07	2.062	2.459	3.24	3.253	1.193	1.032	1.05	0.904	1.177	0.928	0.989	1.042
FBgn0038243	CG8066		protein_coding	0.03971	0.7658	1.512	1.728e-13	17.602	20.661	24.612	23.585	10.928	8.185	8.37	6.649	6.652	7.951	8.392	6.566
FBgn0005612	Sox14		protein_coding	0.3927	0.03162	2.391	3.648e-29	30.853	30.289	37.251	37.36	6.785	11.159	13.211	9.81	5.426	5.517	6.825	7.92
FBgn0030716	CG9170		protein_coding	-0.0134	0.9515	0.4781	0.09826	0.808	1.672	1.472	0.691	0.658	0.6	0.682	0.699	0.719	0.626	0.659	0.91
FBgn0032988	Tif-IA	RRN3	protein_coding	-0.02125	0.9212	-0.7187	4.895e-11	64.642	59.792	69.348	59.925	103.344	93.82	106.105	104.63	101.646	108.541	108.603	106.307
FBgn0038291	CG3984		protein_coding	0.017	0.9252	4.198	9.701e-13	0.552	1.185	1.611	1.197	0.109	0.087	0.05	0.04	0.082	0.032	0.035	0.074
FBgn0032554	CG15278		protein_coding	-0.01535	0.921	-0.1219	0.8168	0	0	0	0	0	0	0	0	0	0	0	0.015
FBgn0052206	CG32206		protein_coding	5.045	3.019e-07	5.632	5.226e-11	0.226	0.197	0.141	0.217	0.108	0.104	0.108	0.15	0	0.011	0	0
FBgn0026751	XRCC1	XRCC1	protein_coding	-0.09002	0.3161	-0.4459	1.41e-06	22.934	24.758	22.187	19.724	30.308	28.95	22.927	26.415	30.415	32.165	31.614	28.918
FBgn0003028	ovo		protein_coding	0.003892	1	-0.3991	0.01144	56.644	46.123	47.284	52.979	70.805	69.388	67.577	70.128	66.136	72.242	68.694	67.644
FBgn0053505	U3-55K	RRP9	protein_coding	0.009757	0.9794	-0.5316	7.589e-07	36.447	35.004	30.481	33.329	48.997	46.7	55.939	50.464	50.851	49.526	50.277	47.702
FBgn0038313	CG4338	TSR3	protein_coding	0.01287	0.9607	-0.1029	0.521	30.211	43.631	30.911	33.525	38.223	39.535	37.081	39.578	41.563	38.061	34.504	35.184
FBgn0266282	jnj		protein_coding	-0.3056	0.002494	-0.9693	2.887e-24	19.575	18.57	18.232	16.567	31.706	27.263	25.246	26.96	33.179	37.748	39.834	33.934
FBgn0038321	CG6218	NAGK	protein_coding	0.07594	0.4872	1.864	2.267e-19	28.269	28.495	30.843	39.163	7.501	9.797	14.267	11.803	8.825	8.217	8.173	9.233
FBgn0259697	nvd		protein_coding	0.01423	0.9511	2.468	1.685e-15	5.84	5.756	7.537	8.298	1.084	1.357	1.387	1.501	1.273	0.919	0.842	1.834
FBgn0029996	UbcE2H	UBE2H	protein_coding	0.01845	0.9371	-0.527	7.914e-05	110.835	93.768	112.681	93.258	166.941	162.579	152.385	150.926	140.687	156.822	154.599	153.086
FBgn0037941	CG12594		protein_coding	0.01119	0.9511	0.5649	0.3254	0.011	0	0.009	0	0	0	0.008	0	0	0	0	0
FBgn0051431	CG31431		protein_coding	0.05393	0.6296	3.123	1.872e-16	3.259	4.873	6.785	4.574	0.563	0.685	0.881	0.935	0.564	0.622	0.449	0.534
FBgn0014427	CG11899	PSAT1	protein_coding	0.0002191	1	-0.2577	0.2543	90.677	117.133	84.683	86.603	104.193	105.539	123.37	137.855	130.197	113.82	107.917	118.545
FBgn0003366	sev		protein_coding	0.06564	0.5519	3.052	4.209e-29	11.446	12.438	15.414	15.082	1.618	2.202	2.464	2.225	1.293	1.325	1.87	1.97
FBgn0032929	Mcm10	MCM10	protein_coding	-0.1056	0.2779	-1.22	1.048e-24	31.849	25.179	25.297	24.374	59.916	56.508	44.95	51.247	59.435	66.043	68.774	58.203
FBgn0015513	mbc	DOCK2	protein_coding	0.02788	0.8718	0.5008	2.687e-06	35.018	30.656	38.536	35.509	24.771	26.37	27.685	23.775	21.907	24.459	25.511	25.512
FBgn0259923	Sep4		protein_coding	0.02721	0.8757	-0.06726	0.6765	16.167	14.383	15.699	13.679	16.924	15.789	19.754	14.909	14.601	15.149	17.015	16.242
FBgn0261955	kdn	CS	protein_coding	0.02267	0.9135	0.3774	0.007114	108.03	105.853	105.641	121.008	86.202	88.476	91.745	85.775	81.48	79.864	79.438	91.995
FBgn0028544	CG16884		protein_coding	0.03684	0.706	3.515	0.001392	0.108	0.137	0.153	0.059	0.019	0	0	0.049	0	0	0.021	0
FBgn0037612	CG8112	SOAT2,SOAT1	protein_coding	-0.06716	0.5357	-0.1344	0.4354	29.658	32.567	28.197	29.671	28.28	27.311	27.591	29.435	34.633	34.246	33.893	30.281
FBgn0035515	CG14997	AC090527.2,SQOR	protein_coding	0.01269	0.9605	-0.3115	0.07202	10.729	17.033	17.203	15.009	19.454	21.012	18.501	20.514	19.884	18.661	18.414	19.342
FBgn0051690	CG31690		protein_coding	0.008671	0.9745	5.855	2.608e-30	5.592	9.297	11.692	11.811	0.108	0.17	0.17	0.208	0.158	0.067	0.074	0.292
FBgn0010292	bys	BYSL	protein_coding	0.04199	0.7505	-0.1026	0.3793	58.485	59.884	53.341	55.658	58.967	67.34	74.272	63.253	59.539	59.126	60.629	65.538
FBgn0011818	oaf		protein_coding	-0.03178	0.837	-0.4973	4.609e-08	37.843	33.094	32.744	30.253	46.559	44.249	46.597	44.131	47.241	48.054	48.117	47.468
FBgn0028509	CenG1A		protein_coding	0.003405	1	-0.2265	0.0478	14.573	14.201	13.716	13.129	16.176	16.828	16.493	16.477	15.707	17.436	16.296	16.099
FBgn0027507	CG1344		protein_coding	-0.04797	0.6901	-0.843	1.143e-14	25.352	21.813	25.209	22.991	42.395	41.256	38.873	37.003	41.756	46.356	42.616	43.497
FBgn0035421	CG12034	SMPD2	protein_coding	-0.08502	0.2139	-0.4383	7.127e-15	40.369	39.037	35.703	36.927	47.245	48.314	45.153	48.75	52.706	53.492	49.793	50.525
FBgn0031059	CG14229		protein_coding	-0.06426	0.543	-0.7085	4.208e-10	11.628	11.295	12.595	10.05	17.701	17.511	15.554	16.856	19.603	19.136	19.44	17.696
FBgn0039058	VhaAC39-2		protein_coding	0.01711	0.9143	3.848	2.703e-05	0.248	0.314	0.377	0.314	0.044	0	0.071	0	0	0.022	0.024	0.021
FBgn0260477	CG30283		protein_coding	-0.001485	1	1.3	0.0765	0.047	0.047	0.226	0.067	0.033	0	0.035	0	0	0.066	0	0
FBgn0037094	CG7611	WDR26	protein_coding	0.03421	0.8148	0.382	8.35e-06	43.459	45.853	55.915	49.165	37.759	41.452	40.391	36.28	32.87	38.678	39.875	36.728
FBgn0038286	CG6966		protein_coding	-0.03454	0.8033	-0.3959	1.242e-07	42.285	37.278	39.427	38.957	52.314	49.105	47.403	50.817	49.891	54.378	54.823	49.884
FBgn0034834	LS2	U2AF2	protein_coding	0.03805	0.6957	4.052	0.0002175	0.163	0.165	0.198	0.098	0	0.018	0	0.05	0	0.019	0	0
FBgn0036837	CG18135		protein_coding	-0.006786	0.9926	0.355	0.1024	54.704	65.945	82.453	71.789	48.188	46.998	57.243	46.308	46.433	51.129	50.009	57.369
FBgn0037822	CG14683	METTL15	protein_coding	0.01896	0.9347	-0.4162	3.722e-07	55.969	58.368	49.043	54.579	73.287	76.955	74.389	76.244	75.771	72.171	71.43	73.393
FBgn0004646	ogre		protein_coding	0.07224	0.5187	2.285	9.202e-09	50.151	50.32	70.655	77.035	14.009	17.25	25.052	18.638	11.325	10.923	10.561	16.473
FBgn0034994	Ir60a		protein_coding	0.01063	0.9515	0.5085	0.362	0	0.036	0	0.013	0	0.023	0	0	0.013	0	0	0
FBgn0053512	dpr4		protein_coding	0.01124	0.9511	0.2814	0.5909	0	0.026	0	0	0.009	0	0.01	0	0.01	0	0	0
FBgn0029531	CG13362		protein_coding	-0.0004344	1	0.6514	0.1057	0.181	0.092	0.239	0.197	0.08	0.119	0.121	0	0.118	0.097	0.09	0.015
FBgn0038296	CG6752	RNF123	protein_coding	0.01315	0.9605	-1.915	3.926e-21	1.45	2.324	2.034	1.385	7.714	7.822	6.443	6.731	6.613	7.367	6.549	6.82
FBgn0264385	CR43837		ncRNA	-1.351	3.204e-06	-3.468	2.769e-34	2.017	1.834	1.684	1.8	7.525	9.172	6.256	5.89	21.088	21.283	20.168	20.147
FBgn0030668	CG8128	NUDT6	protein_coding	-0.06158	0.577	-0.5174	0.001027	10.063	13.678	11.607	10.372	14.041	13.175	13.318	17.193	18.619	17.307	16.906	14.713
FBgn0085432	pan		protein_coding	-0.002518	1	1.024	0.000138	3.213	3.881	5.514	4.039	1.526	1.911	2.175	1.633	1.561	1.785	1.853	2.155
FBgn0259685	crb		protein_coding	0.0281	0.861	0.3148	0.1133	25.878	24.977	34.342	27.621	22.112	24.999	26.844	23.486	20.804	20.648	22.112	24.113
FBgn0031805	CG9505		protein_coding	-0.02181	0.8967	0.09747	0.7766	1.888	1.643	1.677	1.496	1.159	1.393	1.312	1.099	1.961	1.158	0.497	2.379
FBgn0015623	Cpr	POR	protein_coding	-0.01681	0.9452	-0.355	0.01277	73.462	74.617	77.19	73.086	102.155	91.962	84.498	93.695	96.266	98.756	100.825	92.861
FBgn0260960	Baldspot	ELOVL3,ELOVL6	protein_coding	-0.02193	0.9188	-0.2706	0.03318	35.936	29.254	40.201	35.976	34.317	39.743	47.111	43.225	39.96	43.699	42.362	46.437
FBgn0036984	CG13248		protein_coding	0.5328	0.04614	6.09	1.411e-28	0.87	1.247	2.202	1.684	0.047	0.079	0.102	0.057	0	0.038	0.011	0.027
FBgn0031053	CG14223		protein_coding	-0.04152	0.7392	1.13	8.705e-06	2.909	2.72	2.698	3.523	0.848	1.277	1.024	0.926	1.389	1.505	0.807	1.275
FBgn0032330	Samuel		protein_coding	-0.03399	0.8201	0.2941	0.01892	6.519	6.266	7.703	8.175	5.25	4.764	6.556	4.96	5.493	5.795	5.889	5.949
FBgn0038683	CG11779	TIMM44	protein_coding	0.009428	0.9804	-0.263	0.001087	35.602	34.184	32.027	31.444	39.473	38.955	42.326	41.921	37.497	41.297	40.427	41.306
FBgn0003062	Fib	FBLL1,FBL	protein_coding	0.1018	0.3182	0.4802	0.0006195	217.369	305.757	203.223	260.357	182.016	203.86	222.588	231.166	195.287	168.33	148.02	179.23
FBgn0259937	Nop60B	DKC1	protein_coding	0.007262	0.9928	-0.5664	7.528e-11	196.115	178.78	167.762	174.502	265.84	266.365	290.324	262.332	257.271	272.73	266.72	275.919
FBgn0035761	RhoGEF4		protein_coding	-0.1802	0.08924	-0.0991	0.475	17.75	22.493	21.256	21.057	18.831	18.79	14.735	17.803	20.801	23.572	23.688	20.757
FBgn0050349	CG30349		protein_coding	0.1002	0.2369	0.08325	0.3798	65.895	65.685	61.829	62.508	66.412	71.023	71.329	65.016	59.467	60.178	58.906	62.579
FBgn0013269	FK506-bp1		protein_coding	0.01955	0.9332	-0.1607	0.1254	399.271	389.149	315.839	357.185	402.583	428.331	457.9	407.903	400.825	418.069	381.68	439.757
FBgn0034636	twz		protein_coding	8.672	1.005e-47	8.779	1.59e-51	10.938	12.367	9.76	10.843	8.903	10.416	9.486	8.906	0	0.03	0.022	0.028
FBgn0036235	CG6938		protein_coding	-0.04721	0.6294	-0.08473	0.8418	0.009	0.009	0.007	0.013	0	0.012	0.007	0	0.027	0.006	0.014	0
FBgn0031817	CG9531	HEMK1	protein_coding	-0.03101	0.8449	0.02903	0.8506	12.121	14.734	14.029	11.75	12.188	11.31	12.662	12.058	13.104	12.929	13.101	12.359
FBgn0028863	CG4587		protein_coding	0.178	0.2115	5.446	6.341e-42	4.644	5.599	7.941	7.832	0.222	0.255	0.38	0.216	0.109	0.157	0.11	0.184
FBgn0004573	5-HT7	HTR7	protein_coding	0.06284	0.5447	3.758	1.425e-08	0.111	0.164	0.207	0.173	0.024	0.017	0.032	0.021	0.013	0.006	0.007	0.017
FBgn0085478	CG34449		protein_coding	-0.04341	0.7359	-0.1463	0.2419	14.805	14.691	16.446	16.313	15.585	15.95	15.234	16.881	16.689	18.239	17.137	17.218
FBgn0038989	CG6937		protein_coding	-0.07396	0.4352	-0.705	1.327e-15	87.995	89.901	68.588	77.225	119.076	111.096	119.899	130.326	146.429	128.62	130.714	127.82
FBgn0027330	l(1)G0020	NAT10	protein_coding	-0.05	0.6741	0.07741	0.5517	32.047	33.569	30.89	30.665	25.87	26.867	30.72	25.905	29.544	29.731	29.888	31.014
FBgn0016034	mael		protein_coding	0.1717	0.04368	-0.449	2.949e-07	38.981	33.21	34.949	31.439	56.549	59.204	58.212	54.777	47.926	47.346	50.218	45.24
FBgn0034021	CG8180		protein_coding	-0.07381	0.501	-1.048	4.83e-07	102.915	92.345	78.163	80.016	172.447	145.163	130.408	164.19	192.171	208.569	206.271	169.67
FBgn0053200	VepD		protein_coding	-0.002611	1	0.849	0.1114	0.101	0.102	0.163	0.109	0.036	0.033	0	0.061	0.075	0	0	0.068
FBgn0031968	CG7231		protein_coding	-0.01538	0.9452	0.1141	0.6856	8.752	10.373	9.933	8.775	7.945	7.689	6.669	8.78	8.831	7.609	9.141	8.477
FBgn0032987	RpL21	RPL21	protein_coding	0.06662	0.4735	0.1486	0.06424	2019.11	2018.91	2064.34	2130.23	1952.54	2015.79	2162.11	1935.3	1848.51	1854.16	1740.38	1966.93
FBgn0022338	dnk	TK2	protein_coding	-0.224	0.02747	-1.403	3.304e-40	70.184	65.869	52.59	58.906	152.395	125.149	103.336	140.832	167.847	178.082	174.602	139.465
FBgn0035630	CG10576		protein_coding	-7.797e-05	1	-0.1698	0.1458	399.57	370.447	333.39	357.282	394.259	390.842	453.084	413.825	419.959	417.704	396.099	418.479
FBgn0034365	CG5335		protein_coding	0.1335	0.1921	-0.1478	0.3039	21.445	21.532	24.211	21.798	31.27	28.175	32.04	31.55	23.398	25.944	26.092	23.899
FBgn0052521	CG32521		protein_coding	-0.06526	0.5373	0.5987	2.867e-07	24.175	32.851	35.376	30.617	18.185	17.718	16.604	18.074	18.954	20.944	19.171	20.657
FBgn0264704	CR43973		ncRNA	-0.09067	0.4301	-0.8252	0.009058	7.676	7.848	10.106	8.377	11.746	12.858	10.573	10.293	17.096	18.059	21.51	15.513
FBgn0013726	pnut	SEPT7	protein_coding	-0.01798	0.9403	0.01518	0.8932	107.631	104.341	110.478	110.935	109.351	105.47	98.535	104.114	106.649	112.828	105.598	103.671
FBgn0264699	CG43968		protein_coding	0.0225	0.8666	3.401	3.168e-05	0.037	0.175	0.16	0.08	0.009	0.024	0	0.023	0	0.009	0	0.025
FBgn0032051	CG13097	MPHOSPH10	protein_coding	0.04924	0.66	-0.4806	5.297e-09	37.947	30.763	34.562	33.095	51.78	53.219	54.616	45.919	44.463	50.111	46.969	50.228
FBgn0261556	CG42674		protein_coding	-0.1217	0.2139	-0.8233	3.585e-12	4.952	5.044	5.49	4.924	7.628	8.029	7.285	7.664	8.615	9.962	9.81	8.519
FBgn0000636	Fas3		protein_coding	0.07895	0.4845	3.945	2.842e-19	45.602	56.369	84.251	72.777	4.658	6.812	9.068	5.581	3.174	3.894	3.685	5.195
FBgn0031730	CG7236		protein_coding	0.02164	0.8801	2.592	0.000919	0.077	0.233	0.174	0.354	0.011	0.081	0.07	0.009	0.046	0	0.024	0.041
FBgn0267297	CR45733		ncRNA	0	1	0.2742	0.6071	0	0	0.111	0	0	0	0	0	0	0	0	0
FBgn0003390	shf		protein_coding	0.02896	0.837	4.35	3.469e-31	5.109	6.294	7.778	8.756	0.301	0.364	0.454	0.519	0.27	0.273	0.235	0.529
FBgn0035346	CG1146		protein_coding	-0.04559	0.7132	0.1938	0.2813	18.687	19.464	27.94	20.133	15.856	16.401	16.699	15.894	17.337	20.121	19.447	17.319
FBgn0261553	CG42671		protein_coding	-0.04135	0.7599	0.3895	0.002507	17.944	20.118	26.318	22.595	15.49	15.14	14.825	14.233	15.277	16.937	17.62	15.499
FBgn0051560	CG31560		protein_coding	0	1	0.2761	0.6024	0.039	0	0	0	0	0	0	0	0	0	0	0
FBgn0004167	kst	SPTBN5	protein_coding	0.01911	0.9188	0.5266	0.1156	24.006	21.34	27.871	25.202	14.283	16.878	20.103	14.968	12.599	12.534	13.132	16.699
FBgn0015393	hoip	SNU13	protein_coding	-0.06012	0.5853	-0.2346	0.1114	462.155	467.198	359.718	423.946	445.027	392.007	453.7	489.664	579.969	490.72	481.181	489.496
FBgn0037144	CG7458		protein_coding	-0.0691	0.5292	-1.427	7.764e-09	14.916	14.728	10.812	10.438	28.129	26.272	25.65	30.377	38.572	36.099	36.162	32.644
FBgn0085386	CG34357		protein_coding	0.05751	0.591	4.225	1.07e-13	0.184	0.327	0.43	0.312	0.032	0.013	0.049	0.018	0.004	0.028	0.012	0.017
FBgn0023511	Edem1		protein_coding	0.01676	0.9403	-0.08866	0.1767	15.328	14.722	16.009	15.343	16.344	16.143	17.767	16.379	16.107	16.976	16.451	15.841
FBgn0004509	Fur1		protein_coding	0.00102	1	0.7482	3.041e-08	20.868	24.994	34.397	25.891	14.946	15.442	15.99	15.24	14.843	15.489	15.66	15.47
FBgn0051013	CG31013		protein_coding	-0.04125	0.738	-0.3845	0.1625	0.281	0.329	0.316	0.172	0.23	0.37	0.495	0.158	0.371	0.386	0.41	0.393
FBgn0032408	CG6712	RPF1	protein_coding	-0.01906	0.9352	-0.1061	0.3318	50.798	55.262	48.11	46.008	50.726	51.925	54.08	52.212	56.972	53.626	51.756	53.596
FBgn0026079	Nsun2	NSUN2	protein_coding	0.1091	0.237	0.549	8.234e-08	41.989	46.224	37.769	38.55	28.979	33.753	34.926	31.971	30.188	28.087	25.043	27.575
FBgn0033434	CG1902		protein_coding	-0.0457	0.7024	0.5921	1.414e-11	31.2	32.572	36.152	34.34	21.954	21.001	18.936	20.386	23.282	21.133	22.396	21.384
FBgn0003943	Ubi-p63E	UBC	protein_coding	0.0205	0.9206	0.1292	0.5613	69.11	59.812	74.942	65.475	63.893	65.063	70.001	64.484	58.058	62.757	60.4	61.108
FBgn0020379	Rfx		protein_coding	0.0147	0.9515	-0.3802	0.05	6.124	5.985	5.758	4.794	7.684	8.259	8.372	8.103	7.384	7.955	7.537	7.776
FBgn0051361	dpr17		protein_coding	-0.1998	0.1801	0.2402	0.483	0.12	0.078	0.09	0.074	0.042	0.022	0.02	0.016	0.019	0.049	0.088	0.109
FBgn0264490	Eip93F		protein_coding	0.1187	0.2974	2.453	1.942e-28	5.739	7.901	11.169	9.791	1.445	2.229	2.505	2.386	1.356	1.69	1.471	1.751
FBgn0037153	olf413	MOXD1	protein_coding	0.1784	0.2113	3.666	4.842e-15	0.265	0.246	0.308	0.298	0.032	0.057	0.045	0.047	0.034	0.02	0.014	0.015
FBgn0038473	Ns1		protein_coding	0.06849	0.5045	-0.05978	0.6263	72.051	67.604	68.408	69.087	78.588	84.502	89.89	71.285	68.296	73.282	71.273	76.534
FBgn0263605	l(3)72Dn		protein_coding	0.03136	0.8414	-0.3316	0.006396	34.482	29.699	30.296	29.458	41.571	41.689	45.061	40.181	37.264	40.562	41.673	38.384
FBgn0035246	CG13928		protein_coding	0.01186	0.9515	4.759	4.136e-13	0.429	0.554	0.623	0.417	0.052	0.01	0.011	0.009	0.033	0.021	0	0.01
FBgn0036942	CG7328	KHK	protein_coding	0.09479	0.3467	-0.286	0.04326	6.427	6.868	7.733	6.662	10.426	10.967	9.815	9.809	9.064	7.842	9.309	8.08
FBgn0033485	RpLP0-like		protein_coding	0.05468	0.622	0.3107	0.004024	103.29	108.223	94.104	104.983	84.866	93.3	94.007	88.612	85.937	79.026	78.131	84.903
FBgn0262114	RanBPM		protein_coding	0.01286	0.9607	-0.02793	0.7877	52.655	48.661	56.142	51.468	55.317	56.139	54.083	51.69	49.444	54.557	56.982	52.16
FBgn0028979	tio		protein_coding	-0.02699	0.8588	1.533	3.619e-07	0.188	0.224	0.342	0.291	0.076	0.066	0.077	0.069	0.075	0.067	0.122	0.081
FBgn0285910	VhaAC39-1		protein_coding	0.0353	0.7902	0.2109	0.001763	147.242	157.821	164.663	165.549	141.598	137.005	143.114	149.466	130.205	140.074	133.148	144.172
FBgn0037304	CG1113		protein_coding	0.2989	0.1068	0.8527	0.0143	0.461	0.661	0.264	0.166	0.448	0.379	0.249	0.432	0.186	0.137	0.243	0.116
FBgn0034223	Tes		protein_coding	0.01495	0.9515	0.009934	0.9262	29.052	29.018	31.895	29.206	31.132	30.442	29.903	29.28	28.209	30.516	30.273	29.357
FBgn0029823	Shmt	SHMT1,SHMT2	protein_coding	0.01866	0.9371	0.1694	0.2597	100.385	141.853	97.996	103.373	93.63	95.836	102.29	118.059	105.103	95.864	93.211	96.639
FBgn0038038	CG5167	SCCPDH	protein_coding	0.0351	0.7957	0.3761	0.1286	16.255	28.521	29.816	18.115	15.735	18.628	21.85	23.46	19.748	14.622	14.465	17.74
FBgn0023527	CG3071	UTP15	protein_coding	-0.07217	0.4607	-0.427	6.916e-06	47.191	49.86	39.587	41.809	52.579	52.938	54.278	57.461	64.955	60.748	59.541	56.854
FBgn0003312	sad	CYP27B1	protein_coding	0.06028	0.5865	1.668	5.298e-08	8.799	10.001	8.002	9.914	2.73	3.657	4.617	3.834	2.666	2.63	2.163	3.562
FBgn0028422	GluRIID		protein_coding	0.006312	0.9918	4.968	1.77e-18	4.543	6.825	10.138	7.026	0.176	0.269	0.265	0.174	0.25	0.239	0.108	0.217
FBgn0030720	CG8939	FTSJ3	protein_coding	0.05836	0.5991	0.1266	0.3954	60.954	51.591	52.004	56.941	56.19	59.682	62.989	50.286	45.808	50.228	48.609	56.919
FBgn0267945	CR46225		ncRNA	0	1	0.2709	0.6148	0	0.07	0	0	0	0	0	0	0	0	0	0
FBgn0051098	CG31098		protein_coding	0.03724	0.7909	-0.3936	0.02692	12.779	14.658	15.707	13.698	21.769	20.875	22.942	21.325	17.579	19.624	20.123	19.855
FBgn0035383	CPT2	CPT2	protein_coding	0.07357	0.4774	0.1558	0.2267	24.596	22.222	24.246	24.724	23.49	24.408	25.925	24.015	20.449	21.057	22.313	21.657
FBgn0266819	CR45281		ncRNA	0.005344	0.9973	2.053	4.215e-05	0.09	0.104	0.078	0.033	0.032	0.017	0.01	0.012	0.024	0.018	0.005	0.017
FBgn0037646	CAHbeta		protein_coding	-0.0476	0.6917	-1.395	2.242e-11	6.863	4.848	5.208	5.373	15.795	11.819	11.556	12.273	14.038	14.854	16.869	14.928
FBgn0021874	Nle	NLE1	protein_coding	0.2976	0.004488	0.7837	2.607e-15	32.707	38.031	36.51	34.687	22.689	26.213	29.979	26.972	20.601	19.49	18.796	22.303
FBgn0010905	Spn		protein_coding	-0.01772	0.9352	-0.767	0.0004097	23.382	18.196	19.444	19.634	33.178	35.31	35.589	32.831	35.646	37.136	38.648	36.815
FBgn0011704	RnrS	RRM2B,RRM2,AC007240.1	protein_coding	-0.2706	0.02435	-1.389	7.49e-28	168.468	162.225	129.912	135.083	340.608	293.015	237.967	313.548	395.902	401.037	427.28	356.018
FBgn0261446	CG13377		protein_coding	0.03639	0.7902	1.947	2.254e-13	15.794	20.407	24.453	22.282	6.167	6.092	5.464	7.413	6.405	4.112	4.948	5.679
FBgn0024179	wit		protein_coding	-0.05724	0.6078	1.915	2.951e-09	5.023	4.756	7.059	6.193	0.846	1.347	1.306	0.889	1.499	1.546	1.518	1.358
FBgn0266284	Ns3	LSG1	protein_coding	0.02855	0.8576	-0.08478	0.2924	44.841	48.608	40.642	44.467	48.618	48.987	51.211	47.86	48.379	46.222	47.277	47.643
FBgn0036712	brv2		protein_coding	0.295	0.1258	0.7728	0.2044	0.032	0.016	0	0.012	0.034	0.011	0.062	0.03	0	0	0	0.011
FBgn0069923	CG41128		protein_coding	0.0125	0.9613	-0.3332	0.03506	102.624	98.915	79.397	110.399	150.222	130.851	105.648	135.538	124.306	124.074	128.578	126.818
FBgn0030357	Sclp		protein_coding	-0.03235	0.8155	0.8486	0.001342	4.66	8.187	12.653	8.427	3.947	3.075	3.172	3.791	4.225	4.033	4.029	4.464
FBgn0039025	Usp12-46		protein_coding	0.008826	0.9832	0.03172	0.8648	22.078	22.514	26.641	22.731	25.843	24.531	22.668	20.952	20.118	25.074	24.205	22.36
FBgn0002719	Men		protein_coding	0.008459	0.9822	0.5219	0.02081	104.865	142.859	181.129	134.817	90.119	99.36	89.191	101.795	103.156	80.468	91.675	89.708
FBgn0038302	CG4210	SAT2,SAT1	protein_coding	-0.03833	0.767	-0.516	0.04932	11.605	13.113	12.354	11.387	16.218	14.41	15.976	15.636	22.171	18.115	19.525	17.241
FBgn0010770	ppan	PPAN	protein_coding	-5.42e-05	1	-0.3569	0.005838	40.254	35.281	34.94	35.067	46.524	50.762	49.154	42.766	45.21	49.393	46.284	48.323
FBgn0052251	Claspin		protein_coding	-0.08304	0.3982	-1.022	7.769e-21	26.41	17.66	18.7	20.75	39.854	37.531	36.875	36.144	41.012	42.606	43.539	45.304
FBgn0260965	CG42588		protein_coding	0.006757	0.9949	-0.1609	0.2175	3.991	3.803	4.216	3.605	4.168	4.634	4.802	4.227	4.071	4.137	4.549	4.811
FBgn0052687	CG32687	LRRC58	protein_coding	0.1116	0.3137	3.717	1.015e-73	37.866	53.246	67.201	64.15	4.853	6.618	6.132	4.685	3.373	4.456	4.718	4.195
FBgn0050355	CG30355		protein_coding	0	1	0.9004	0.1704	0	0	0.041	0.074	0	0	0	0	0	0	0	0
FBgn0266570	CG2982	RIOX1	protein_coding	-0.01454	0.9515	-0.5696	0.001376	123.097	100.598	100.292	98.64	154.311	151.131	162.217	155.795	160.076	167.3	166.032	162.388
FBgn0264679	CR43964		ncRNA	0.08804	0.4422	0.5884	0.06226	0.589	1.037	0.829	0.758	0.434	0.555	0.585	1.309	0.762	0.31	0.303	0.395
FBgn0029824	CG3726		protein_coding	0.4156	0.02915	-0.07215	0.7614	10.068	10.428	10.653	11.232	18.721	20.039	17.007	17.336	10.633	11.603	11.725	11.012
FBgn0038140	PK2-R1		protein_coding	0.006248	0.9867	0.2907	0.5023	0	0	0.068	0	0.02	0.027	0	0	0.01	0.01	0	0.019
FBgn0030841	CG8568		protein_coding	0.02221	0.8666	2.735	0.001323	0.159	0.073	0.047	0.094	0.01	0	0.055	0.009	0	0.01	0.011	0.019
FBgn0037291	CG14662		protein_coding	0.04752	0.6138	4.072	0.0001361	0.249	0.136	0.139	0.18	0.014	0.013	0	0.058	0	0.014	0	0.013
FBgn0035989	CG3967		protein_coding	-0.01822	0.9384	-0.1183	0.4449	11.542	11.192	11.518	10.145	12.632	11.77	10.607	11.291	11.377	13.023	12.432	11.664
FBgn0036576	CG5151		protein_coding	-0.06446	0.526	-0.1277	0.2158	14.81	14.025	17.981	15.74	15.402	15.067	15.654	15.997	16.315	18.277	17.615	16.373
FBgn0263492	CR43481		ncRNA	0.03673	0.7818	-0.095	0.7452	2.952	2.469	2.328	2.677	2.675	3.613	4.368	3.299	3.18	2.36	2.082	3.761
FBgn0034308	CG10915		protein_coding	-0.02166	0.9092	-0.4013	1.725e-10	27.026	23.414	26.025	23.583	32.701	29.989	33.547	33.115	33.009	33.571	34.023	32.039
FBgn0025832	Fen1	FEN1	protein_coding	-0.1176	0.2113	-0.5177	1.79e-06	36.403	35.962	30.684	33.615	42.331	41.459	38.436	45.197	53.562	50.25	48.316	46.336
FBgn0028744	CG5033	BOP1	protein_coding	0.1031	0.2716	0.07161	0.5618	62.66	55.532	55.692	54.913	59.443	67.925	68.754	57.586	51.287	54.045	51.838	60.018
FBgn0037292	plh		protein_coding	-0.01114	0.9529	3.376	2.448e-05	0.254	0.472	0.378	0.766	0	0.028	0.065	0.026	0.032	0.03	0.033	0.057
FBgn0015239	Hr78		protein_coding	0.05239	0.5644	-0.3029	2.719e-07	39.214	39.611	40.422	40.977	52.03	52.782	54.956	50.029	47.632	51.952	52.305	46.383
FBgn0032689	CG10413		protein_coding	0.01029	0.9745	0.2946	0.01589	47.073	48.457	58.785	51.664	44.516	43.782	39.057	42.425	39.851	41.983	43.854	40.406
FBgn0020660	eIF4B		protein_coding	-0.0137	0.9542	0.02588	0.9262	7.181	6.406	7.317	7.406	7.626	6.787	6.184	5.548	7.467	6.073	6.253	7.921
FBgn0263507	CR43496		ncRNA	0.009402	0.9804	-0.3361	0.02575	3.165	4.082	4.495	4.763	5.151	6.44	4.558	5.728	5.359	4.762	6.06	5.24
FBgn0035782	CG14835		protein_coding	0.01093	0.9515	0.2795	0.5932	0.058	0	0.047	0	0	0	0	0.071	0	0	0	0.039
FBgn0043791	phu		protein_coding	0.02491	0.8251	3.76	0.0004742	0.041	0.062	0.083	0.178	0	0.013	0	0.025	0	0.015	0	0
FBgn0015773	NetA	NTN3,NTN1	protein_coding	-0.01113	0.9608	3.762	4.352e-24	1.361	2.154	2.585	2.513	0.178	0.113	0.061	0.202	0.239	0.09	0.099	0.184
FBgn0262619	DNA-ligI	LIG1	protein_coding	-0.05339	0.6176	-0.6741	1.583e-15	38.363	32.274	33.378	32.572	53.689	50.543	51.575	48.136	51.556	57.585	57.733	53.295
FBgn0000108	Appl		protein_coding	-0.009443	0.9716	0.8171	0.01539	0.593	0.667	0.665	0.667	0.25	0.299	0.301	0.244	0.286	0.333	0.279	0.294
FBgn0267278	CR45714		ncRNA	-0.01044	0.9675	0.02752	0.9426	1.405	1.934	1.401	1.485	1.07	1.516	1.73	1.295	1.557	1.645	1.366	1.476
FBgn0040918	schlank	CERS6,CERS5	protein_coding	0.01434	0.9565	-0.1699	0.08191	59.635	58.47	59.66	58.698	69.146	64.489	70.601	69.127	63.775	68.515	69.338	65.439
FBgn0039703	CG7829		protein_coding	0.01082	0.9515	0.2749	0.6052	0	0.04	0	0	0.028	0	0	0	0	0	0	0
FBgn0266756	btsz		protein_coding	0.04975	0.6638	1.733	8.48e-05	8.348	7.418	8.725	10.927	2.442	3.354	4.768	3.529	2.209	2.083	1.914	3.345
FBgn0031282	Pex12	PEX12	protein_coding	-0.01576	0.9494	0.1639	0.3801	5.161	6.164	5.963	6.502	4.421	4.826	5.58	5.057	6.104	4.874	4.922	5.052
FBgn0032682	grnd		protein_coding	0.01648	0.9371	0.7358	0.01486	0.637	0.59	1.151	0.948	0.592	0.479	0.305	0.543	0.502	0.286	0.345	0.562
FBgn0028671	Vha100-1		protein_coding	0.01613	0.9494	0.2313	0.004193	51.197	55.783	63.76	54.629	47.87	49.833	50.02	47.939	44.631	48.002	49.447	49.209
FBgn0032381	Mal-B1		protein_coding	-0.02985	0.7763	0.5439	0.3159	0.021	0	0.068	0	0	0	0	0	0	0	0.017	0.014
FBgn0011591	fng		protein_coding	0.0473	0.6838	2.449	2.47e-09	20.591	21.245	29.79	26.424	4.224	6.774	8.105	5.122	3.605	4.9	4.208	4.666
FBgn0015380	drl		protein_coding	0.1169	0.3324	5.197	2.779e-45	6.947	9.629	15.508	10.703	0.227	0.543	0.666	0.428	0.165	0.299	0.126	0.513
FBgn0037081	barc		protein_coding	-0.08568	0.3442	-0.3843	3.215e-05	41.746	31.368	35.852	38.236	42.651	42.939	45.744	40.447	46.43	49.918	48.402	48.99
FBgn0035049	Mmp1		protein_coding	0.3977	0.06615	4.292	1.22e-33	4.644	5.43	8.549	6.617	0.33	0.54	1.065	0.63	0.224	0.344	0.193	0.477
FBgn0011762	DNApol-alpha50	PRIM1	protein_coding	-0.03498	0.8136	-0.5004	1.143e-05	22.614	21.517	19.565	20.469	31.576	29.476	24.231	27.601	29.074	30.922	31.966	28.947
FBgn0039795	Spn100A		protein_coding	0.02603	0.8259	-0.3126	0.5319	0	0	0.015	0	0	0.037	0.043	0	0	0.027	0.015	0
FBgn0053213	CG33213		protein_coding	-0.1633	0.1532	-0.7901	5.978e-07	9.835	9.929	9.373	8.665	14.758	14.149	10.182	12.47	17.343	17.122	18.296	15.176
FBgn0035541	CG15019		protein_coding	0.06943	0.4911	0.1631	0.1271	96.988	94.558	93.414	89.461	88.845	93.366	109.021	80.453	80.804	80.067	77.385	94.53
FBgn0030218	CG1628		protein_coding	0.03456	0.8148	1.834	5.158e-35	24.215	31.884	27.617	37.636	8.583	9.365	8.902	10.19	9.305	8.065	7.456	9.035
FBgn0036433	CG9628		protein_coding	-0.01091	0.9678	1.055	4.941e-06	12.096	20.293	26.247	18.308	8.487	8.847	7.635	7.642	8.453	8.674	8.938	8.297
FBgn0003257	r-l		protein_coding	0.04663	0.6993	0.1483	0.1631	77.969	80.506	71.052	78.223	72.163	75.81	75.612	75.329	67.704	70.234	65.321	73.295
FBgn0011760	ctp	DYNLL1	protein_coding	0.01314	0.9605	-0.229	0.1176	66.065	56.327	63.946	66.575	80.372	77.795	77.666	74.504	71.737	74.9	70.843	82.593
FBgn0033741	CG8545		protein_coding	0.07586	0.4549	-0.1787	0.1446	93.259	75.277	78.495	83.494	106.438	112.768	116.365	94.789	85.774	97.973	90.493	102.278
FBgn0035393	CG16753		protein_coding	0.01181	0.9686	-0.5686	8.416e-08	28.426	22.094	22.745	23.622	38.901	39.215	36.188	34.68	34.252	39.159	34.384	37.906
FBgn0051674	CG31674		protein_coding	-0.4934	0.04487	-0.9325	0.00481	3.146	3.155	3.01	2.361	2.098	3.171	4.133	2.226	6.539	6.754	7.336	6.137
FBgn0033313	Cirl		protein_coding	0.1638	0.1403	1.302	7.28e-19	38.662	37.481	47.461	50.5	19.01	22.973	25.295	22.168	15.457	16.085	18.093	19.547
FBgn0003888	betaTub60D		protein_coding	0.1228	0.3048	2.95	6.959e-24	134.019	138.04	180.418	189.908	23.327	29.437	39.986	29.996	17.608	19.106	16.093	28.896
FBgn0037963	Cad87A		protein_coding	0.114	0.2727	0.2793	0.0657	19.088	17.236	20.31	20.331	15.901	20.998	22.937	17.692	15.547	14.98	15.312	16.547
FBgn0083228	Frq2		protein_coding	-0.02	0.9084	5.404	2.78e-27	1.569	2.405	3.82	3.016	0.018	0.056	0.058	0.052	0.032	0.042	0.06	0.097
FBgn0001258	ImpL3		protein_coding	0.2921	0.1102	4.637	9.25e-21	2.973	5.143	6.827	5.024	0.251	0.388	0.69	0.563	0.117	0.225	0.187	0.212
FBgn0004556	Dbp73D	DDX51	protein_coding	0.04585	0.712	-0.2643	0.0257	27.815	24.449	24.399	23.309	32.515	35.477	35.081	29.259	29.61	30.532	30.004	31.009
FBgn0033473	CG12128	SPOUT1	protein_coding	-0.01624	0.9485	-0.6642	1.968e-19	17.95	16.325	15.11	15.668	24.644	26.176	26.132	24.674	26.502	26.367	25.048	25.913
FBgn0031894	CG4496		protein_coding	0.1178	0.2345	-0.5532	1.061e-05	4.012	3.208	3.698	3.21	7.162	6.456	5.945	5.955	5.44	5.2	5.287	5.22
FBgn0027108	Inx2		protein_coding	0.02813	0.8627	1.661	3.142e-19	94.024	98.201	133.253	129.398	34.203	40.88	44.726	35.859	32.227	36.036	35.165	38.338
FBgn0261535	l(2)34Fd	NOL10	protein_coding	0.1218	0.1734	-0.01	0.946	24.117	23.136	21.994	23.339	27.544	29.878	28.066	23.965	22.439	23.806	22.819	24.17
FBgn0035083	Tina-1	GGACT	protein_coding	-0.003488	1	-0.2397	0.3434	55.348	58.936	51.743	50.817	63.27	64.879	66.405	68.547	66.3	62.591	66.266	73.121
FBgn0000578	ena		protein_coding	-0.02242	0.916	0.7024	2.57e-13	26.497	24.841	32.796	29.68	15.736	16.955	17.269	16.461	16.631	16.862	17.252	18.265
FBgn0040321	GNBP3		protein_coding	-0.04	0.7478	1.701	6.239e-06	1.224	2.706	2.65	1.3	0.406	0.361	0.343	0.563	0.558	0.784	0.434	0.47
FBgn0011829	Ret	RET	protein_coding	0.02133	0.9071	1.379	3.367e-06	0.265	0.252	0.366	0.293	0.116	0.118	0.119	0.128	0.128	0.111	0.092	0.089
FBgn0038965	mats	MOB1B,MOB1A	protein_coding	0.0006962	1	-0.3102	9.561e-07	57.263	52.658	55.399	55.759	72.477	67.406	68.826	66.551	67.305	68.069	69.083	70.543
FBgn0034479	CG8654		protein_coding	0.002511	1	4.538	1.444e-09	0.277	0.597	1.053	0.496	0.051	0.016	0.018	0.007	0.045	0.009	0	0.032
FBgn0010226	GstS1	HPGDS	protein_coding	-0.1736	0.1481	0.198	0.2722	60.1	83.08	88.012	85.695	48.998	53.959	47.945	49.82	71.157	69.277	62.262	69.099
FBgn0032553	CG4480		protein_coding	0	1	0	1	0	0	0	0	0	0	0	0	0	0	0	0
FBgn0031568	CG10019		protein_coding	0.5736	0.02968	4.739	9.101e-44	1.297	1.812	2.948	1.888	0.055	0.154	0.243	0.186	0.094	0.047	0.047	0.097
FBgn0040257	Ugt86Dc		protein_coding	-0.03299	0.7957	0.2964	0.4002	0.216	0.121	0.252	0.277	0.051	0.126	0.183	0.044	0.143	0.034	0.151	0.258
FBgn0026015	Top3beta		protein_coding	0.003901	1	-0.2983	0.007256	37.759	33.864	33.692	37.432	45.988	45.823	44.221	42.496	43.525	46.096	44.706	42.857
FBgn0039417	CG6073	HGH1	protein_coding	0.003489	1	-0.5666	7.73e-09	27.918	26.214	22.974	21.029	37.314	36.239	38.316	36.04	36.231	35.642	37.107	38.018
FBgn0034259	P32	C1QBP	protein_coding	-0.008498	0.986	-0.1111	0.4172	187.131	193.945	162.046	178.712	189.605	181.234	196.359	201.373	206.977	190.362	189.334	196.537
FBgn0038306	Art3	PRMT3	protein_coding	0.06325	0.5436	-0.1721	0.1128	43.47	43.694	38.205	40.093	49.289	54.198	55.634	48.604	46.075	48.482	44.975	47.733
FBgn0039756	CG9743		protein_coding	0.01653	0.9419	4.239	9.454e-71	14.341	29.534	37.625	25.836	1.638	1.885	1.042	1.478	1.282	1.432	1.777	1.111
FBgn0266399	CR45039		ncRNA	0.1204	0.2989	2.669	0.007866	0.134	0.135	0.325	0.097	0.047	0.308	0	0	0.05	0	0	0
FBgn0003525	stg		protein_coding	-0.02611	0.8739	-0.9649	1.225e-05	97.82	79.098	74.548	71.494	169.442	150.594	133.058	152.69	163.018	175.667	176.647	163.571
FBgn0038257	smp-30		protein_coding	0.05292	0.6142	4.409	4.202e-11	0.321	0.883	3.421	3.915	0.065	0.136	0.087	0.377	0.154	0.098	0.036	0.062
FBgn0001197	His2Av	H2AFZ,H2AFV	protein_coding	-0.01247	0.963	-0.455	3.871e-07	358.981	355.617	324.513	355.746	521.702	486.919	408.245	474.593	464.307	499.589	492.298	473.163
FBgn0026702	l(1)G0045		protein_coding	0.1024	0.2538	-0.4375	7.112e-06	18.271	20.465	16.92	17.086	26.459	29.024	28.819	30.362	25.627	25.29	24.969	23.586
FBgn0038053	CG18549	MFSD11	protein_coding	-0.02385	0.9044	-0.4331	3.064e-06	27.36	25.404	27.776	24.811	36.138	34.704	32.797	34.482	33.733	37.792	36.795	35.231
FBgn0264672	Eogt	EOGT	protein_coding	0.04216	0.7366	0.3353	0.0001009	14.77	14.79	16.159	15.556	12.299	12.466	13.655	12.968	12.112	12.228	11.131	12.803
FBgn0085358	Diedel3		protein_coding	-0.01379	0.9332	0.6935	0.2336	0.028	0	0.034	0.01	0.01	0	0	0	0	0	0	0.019
FBgn0040066	wds	WDR5,WDR5B	protein_coding	0.04612	0.673	-0.3816	2.318e-08	43.835	42.895	40.349	43.607	60.158	62.486	55.919	57.552	55.19	58.332	54.467	55.343
FBgn0036886	CG9300		protein_coding	0.07344	0.4325	-0.1872	0.03822	34.865	31.766	31.321	30.573	36.789	40.826	44.97	39.902	35.647	37.746	35.699	37.725
FBgn0036801	MYPT-75D	PPP1R16B,PPP1R16A	protein_coding	-0.01509	0.9515	-0.4141	0.0009612	23.092	20.741	22.559	20.096	28.934	29.53	27.252	27.542	28.131	30.542	30.497	27.978
FBgn0050456	CG30456		protein_coding	0.2408	0.07963	1.87	6.621e-25	11.331	12.942	18.057	16.321	3.939	4.9	8.248	5.547	3.77	3.86	3.282	4.997
FBgn0001330	kz	DHX37	protein_coding	-0.002792	1	-0.4887	7.732e-07	16.143	15.764	14.908	15.371	22.016	22.805	22.382	20.638	21.442	22.362	22.89	21.575
FBgn0052075	CG32075		protein_coding	0.08396	0.3572	-0.2271	0.01786	23.312	22.457	21.881	20.612	29.768	31.357	28.582	27.153	25.14	24.678	26.998	26.974
FBgn0264618	CR43958		ncRNA	0.0531	0.6448	0.6915	1.972e-08	11.137	12.836	14.428	13.504	8.93	8.772	7.665	9.719	7.262	7.541	8.349	8.34
FBgn0032997	CG17486	ASNSD1	protein_coding	-0.1589	0.07905	-0.5937	6.227e-10	37.705	32.449	40.866	37.244	51.058	47.97	42.069	47.198	53.068	55.845	60.809	56.955
FBgn0040322	GNBP2		protein_coding	-0.1964	0.1811	1.342	5.316e-06	1.987	2.038	2.022	1.105	0.486	0.285	0.33	0.388	0.607	0.854	0.523	0.599
FBgn0046214	vig2	SERBP1	protein_coding	-0.01515	0.9515	0.04904	0.5759	460.994	463.95	408.766	456.421	405.262	387.266	452.591	448.962	440.107	433.879	413.245	441.713
FBgn0011224	heph	PTBP1,PTBP2,PTBP3	protein_coding	0.005696	1	-0.03238	0.8707	19.42	17.962	19.475	18.934	21.253	20.647	17.622	19.491	18.103	19.878	20.364	19.344
FBgn0040777	CG14767		protein_coding	0.03331	0.8251	0.5914	1.356e-07	88.201	90.146	112.421	102.959	62.545	68.06	79.718	63.902	59.606	63.476	65.619	68.177
FBgn0031657	CG3756	POLR1C	protein_coding	0.02448	0.8999	0.2574	0.01976	36.344	46.405	34.844	37.394	30.655	31.979	35.273	36.671	33.835	31.861	30.955	31.909
FBgn0053170	CG33170		protein_coding	-0.2124	0.0303	-0.1529	0.1634	19.772	21.313	19.121	18.196	17.712	18.227	16.637	17.342	23.356	20.454	21.018	22.619
FBgn0029943	Atg5	ATG5	protein_coding	0.02434	0.8991	-0.4669	0.0006953	15.963	18.293	18.393	14.404	27.615	24.319	25.579	23.02	22.592	23.464	24.169	24.479
FBgn0032886	CG9328		protein_coding	0.003331	1	-0.3082	0.2726	28.78	30.774	31.285	27.83	42.592	41.214	37.414	42.316	36.878	41.033	41.704	40.157
FBgn0038912	CG6656		protein_coding	-0.03702	0.7854	1.918	1.248e-16	4.612	6.101	7.995	7.815	1.754	1.157	1.795	1.238	1.57	1.167	2.174	2.031
FBgn0051522	CG31522	ELOVL1,ELOVL7	protein_coding	0.06209	0.5745	0.4494	0.02499	11.62	10.449	17.775	14.616	7.447	11.698	15.121	12.554	8.687	10.019	8.419	10.868
FBgn0031836	CG11050		protein_coding	-0.0008253	1	0.1616	0.1877	62.368	64.23	73.544	68.273	64.554	61.211	54.208	58.221	55.79	63.321	61.934	57.561
FBgn0051358	CG31358	STOML3	protein_coding	0.01077	0.9515	0	1	0	0	0	0	0	0.007	0	0	0	0	0	0
FBgn0033557	CG12325	PWP2,FP565260.1	protein_coding	0.1178	0.2711	-0.02328	0.9147	20.508	15.645	17.532	18.495	21.642	23.601	27.407	20.907	16.409	17.835	17.4	21.834
FBgn0035524	CG11583	BRIX1	protein_coding	0.0351	0.8075	0.04362	0.6839	68.841	70.633	60.642	66.437	65.632	69.025	71.38	66.67	62.973	63.468	60.318	71.489
FBgn0259822	Ca-beta		protein_coding	0.09364	0.4193	3.771	2.131e-20	2.156	3.022	4.954	3.563	0.298	0.409	0.558	0.323	0.198	0.193	0.166	0.403
FBgn0050424	CG30424		protein_coding	0.1184	0.3294	3.935	7.897e-22	1.116	1.853	2.08	1.404	0.221	0.088	0.221	0.217	0.083	0.032	0.088	0.195
FBgn0260722	CR42549		ncRNA	-0.0229	0.9135	0.6594	4.506e-10	23.78	21.522	26.27	25.475	13.398	15.786	16.047	12.73	13.717	15.05	14.1	17.599
FBgn0039644	CG11897		protein_coding	0.007141	0.9897	-0.5029	0.03895	108.981	79.724	86.906	83.446	129.963	139.666	171.076	136.091	125.816	139.548	141.504	147.568
FBgn0036809	CG12477		protein_coding	0.01705	0.9071	9.339	1.132e-17	13.909	15.866	17.043	24.989	0	0.038	0	0.035	0.021	0	0.023	0
FBgn0039868	CG11563		protein_coding	-0.00122	1	-0.2947	0.02353	57.375	59.727	50.657	51.218	71.659	68.265	66.715	64.525	69.321	66.687	67.657	68.247
FBgn0038833	CG15696		protein_coding	-0.0149	0.9223	4.594	1.377e-05	0.337	0.512	0.273	0.69	0	0	0	0	0	0	0.044	0
FBgn0031574	CG3964	TTLL4	protein_coding	0.01642	0.9482	0.692	2.62e-06	4.131	3.791	3.783	3.898	2.526	2.796	2.264	2.193	2.273	2.707	2.234	2.132
FBgn0000826	png		protein_coding	-0.001501	1	-0.7731	0.003501	31.37	41.461	26.527	25.306	60.519	52.3	52.591	72.732	72.594	61.252	57.815	48.697
FBgn0050151	CG30151		protein_coding	0.008555	0.9765	3.425	6.334e-17	1.232	2.576	1.868	2.327	0.169	0.131	0.242	0.242	0.089	0.198	0.126	0.294
FBgn0261801	CG42747		protein_coding	0.1005	0.391	1.86	4.534e-06	4.242	4.336	5.117	5.475	0.947	1.812	2.988	2.543	1.096	1.289	0.835	1.716
FBgn0052484	Sk2		protein_coding	-0.08858	0.2716	-0.3733	4.483e-07	27.298	29.865	26.355	28.437	32.829	32.324	30.852	35.184	37.861	37.208	37.924	32.77
FBgn0029804	CG3097		protein_coding	0.02689	0.8509	4.504	7.749e-25	0.887	1.23	3.03	1.575	0.041	0.101	0.147	0.082	0.086	0.055	0.061	0.078
FBgn0004629	Cys		protein_coding	0.1113	0.3226	2.54	6.76e-28	97.562	146.622	136.895	143.557	21.623	23.94	40.63	36.463	24.416	19.947	20.775	24.242
FBgn0031693	Cyp4ac1		protein_coding	0.03755	0.7402	3.716	5.086e-08	0.298	0.488	0.558	0.382	0.049	0.015	0.122	0.028	0	0.016	0.036	0.062
FBgn0032791	CG18094	NUDT19	protein_coding	-0.009483	0.9789	-0.2816	0.1026	5.156	5.392	5.273	5.458	6.676	6.483	6.527	5.988	6.778	6.873	6.186	6.603
FBgn0025674	CycK	CCNK	protein_coding	-0.0182	0.9347	-0.3325	4.118e-07	19.3	19.133	19.195	18.471	23.447	22.938	22.176	25.508	23.585	25.121	24.097	23.355
FBgn0284246	l(2)k09848	WDR74	protein_coding	0.06839	0.5007	-0.1958	0.0646	35.396	31.53	34.042	34.446	43.348	45.406	43.11	42.048	37.556	39.068	39.79	39.536
FBgn0033902	eIF3m	EIF3M	protein_coding	0.1023	0.2164	0.2269	0.00718	193.578	211.302	205.239	201.234	189.402	211.825	212.123	169.978	155.271	170.58	178.379	186.241
FBgn0031435	Elba2		protein_coding	0.006017	0.9957	-2.069	3.39e-14	22.895	23.234	14.627	11.033	85.349	81.245	71.048	77.988	73.582	78.09	79.543	74.459
FBgn0032168	CG13126	METTL17	protein_coding	0.02609	0.886	-0.4412	1.508e-05	17.282	16.097	14.951	14.382	22.896	22.557	22.923	21.702	21.446	21.267	21.83	21.492
FBgn0038746	Surf6		protein_coding	-0.03186	0.837	-0.7099	1.977e-10	90.367	76.656	71.083	68.926	124.233	120.908	125.298	110.258	131.507	131.76	124.929	123.279
FBgn0035980	mRRF1	MRRF	protein_coding	0.04755	0.6964	-0.2206	0.08254	21.799	18.901	16.583	17.588	24.979	24.965	24.359	22.368	21.828	23.354	21.248	21.438
FBgn0003278	RpI135	POLR1B	protein_coding	0.04746	0.6963	-0.02072	0.8913	21.359	19.314	22.771	20.883	20.904	23.957	26.934	21.924	19.519	21.181	20.782	24.132
FBgn0030863	CG8188	UBE2S	protein_coding	-0.02511	0.8933	-0.7165	1.568e-15	24.49	20.297	23.529	21.095	39.504	37.383	33.835	32.184	35.265	38.638	36.934	37.859
FBgn0030057	Ppt1	PPT1	protein_coding	-0.09134	0.3607	0.3708	0.003529	14.287	18.68	19.566	17.142	10.949	12.204	10.066	11.765	13.631	12.308	14.201	12.974
FBgn0031874	CG13775		protein_coding	0.0333	0.8217	0.08366	0.6451	3.493	3.164	3.925	3.401	3.725	3.658	3.478	3.56	3.02	3.243	2.925	3.925
FBgn0030081	CG7246		protein_coding	-0.00709	0.993	-0.5663	1.222e-07	24.46	23.877	21.575	20.13	34.125	34.903	33.91	30.542	32.28	36.523	34.614	31.869
FBgn0015520	nonA-l		protein_coding	-0.3161	0.005036	-0.548	3.881e-07	22.667	19.264	23.338	18.533	25.304	25.212	19.866	23.251	30.933	30.179	35.221	28.066
FBgn0004107	Cdk2	CDK3	protein_coding	-0.1126	0.1493	-0.9757	6.35e-38	27.474	22.902	23.094	24.741	47.428	42.594	39.562	41.633	46.299	50.44	51.59	46.423
FBgn0266694	CR45184		ncRNA	0.103	0.2713	0.1574	0.1688	123.422	117.739	116.326	130.531	124.026	134.639	132.348	117.257	99.798	109.305	109.04	117.292
FBgn0030407	CG2543	FPGS	protein_coding	-0.01718	0.9428	0.09129	0.6302	3.638	4.03	4.144	3.033	3.057	3.315	3.911	2.818	3.769	3.481	3.115	3.447
FBgn0004584	Rrp1		protein_coding	-0.155	0.06706	-0.5591	8.352e-11	44.125	41.068	40.338	38.288	53.46	49.303	51.848	50.8	60.389	63.461	59.289	60.516
FBgn0039114	Lsd-1		protein_coding	0.09378	0.4023	3.642	1.093e-46	38.04	31.881	39.21	60.719	3.725	5.168	5.574	3.968	3.007	3.548	3.605	3.235
FBgn0033373	CG8080	NADK2	protein_coding	-0.1095	0.2971	-0.5732	0.0001554	23.466	23.449	23.481	22.908	28.276	26.955	30.384	29.453	36.358	33.842	37.355	35.715
FBgn0267327	Acp33A		protein_coding	0	1	0	1	0	0	0	0	0	0	0	0	0	0	0	0
FBgn0038744	CG4733		protein_coding	-0.1831	0.1849	1.909	1.053e-11	4.551	5.676	8.186	7.764	1.329	0.988	1.018	0.966	1.563	1.735	1.269	2.25
FBgn0035471	Sc2	TECR,TECRL	protein_coding	0.003664	1	0.5692	3.272e-05	113.216	123.994	114.316	138.189	79.171	77.405	80.729	87.484	81.87	79.966	77.933	82.017
FBgn0036058	CG6707	PIP4P2,PIP4P1	protein_coding	0.04073	0.7288	0.2444	0.0003951	81.002	76.805	93.832	88.175	74.256	71.961	78.02	76.403	66.4	71.763	71.698	76.249
FBgn0027608	CG2082	NDRG2,NDRG3,NDRG1	protein_coding	0.02765	0.8527	1.726	6.209e-08	1.762	1.874	2.791	2.692	0.631	0.711	0.85	0.937	0.706	0.636	0.546	0.749
FBgn0043456	CG4747	GLYR1	protein_coding	0.04824	0.6369	-0.2781	2.786e-05	116.828	105.183	105.839	110.332	144.186	148.309	141.652	129.969	123.393	137.66	138.447	133.488
FBgn0039154	Npc2f		protein_coding	0.06693	0.546	3.037	4.315e-16	2.094	3.045	3.089	3.765	0.418	0.565	0.696	0.491	0.2	0.268	0.17	0.757
FBgn0262562	CG43102		protein_coding	0.04854	0.6676	1.829	0.0004277	1.455	1.874	2.895	2.335	0.419	0.722	1.212	0.946	0.577	0.434	0.317	0.744
FBgn0000346	comt	NSF	protein_coding	0.3392	0.01797	0.2228	0.1568	2.18	2.91	3.331	2.641	2.768	4.299	3.407	2.828	2.712	2.412	1.594	2.628
FBgn0035039	Adck	ADCK1	protein_coding	0.03722	0.7939	-0.03988	0.7401	22.854	22.815	19.603	22.756	23.069	23.058	25.385	24.907	24.657	22.171	20.812	22.917
FBgn0030406	CG1463		protein_coding	-0.01127	0.9706	-0.08077	0.5294	19.781	22.399	20.657	21.116	21.737	22.28	22.259	20.785	23.463	23.263	21.318	20.993
FBgn0037235	CG1103		protein_coding	0.03347	0.8167	-0.0614	0.4968	47.162	46.252	46.308	50.133	54.261	51.569	49.811	52.068	50.446	48.02	49.609	50.297
FBgn0030276	Dlic	DYNC1LI2,DYNC1LI1	protein_coding	-0.03913	0.7709	-0.3096	0.000448	68.092	56.3	67.788	60.084	76.701	72.699	76.453	70.813	74.928	80.135	82.511	76.988
FBgn0004878	cas		protein_coding	0.0232	0.8818	4.887	3.369e-20	5.024	6.389	9.27	7.508	0.163	0.335	0.379	0.244	0.145	0.19	0.211	0.318
FBgn0039437	TwdlL		protein_coding	0	1	0.52	0.3882	0.072	0	0	0	0	0	0	0	0	0	0	0
FBgn0039627	CG11837	DIMT1	protein_coding	0.06222	0.5591	-0.1781	0.1417	35.254	38.083	33.194	32.399	42.415	41.701	46.909	45.974	40.428	37.929	37.586	42.13
FBgn0037517	CG10086		protein_coding	-0.00693	0.9839	1.34	0.01981	0.103	0.021	0.199	0.4	0.073	0.027	0.031	0.037	0.015	0	0.065	0.11
FBgn0034573	CG3295	RMND5B,RMND5A	protein_coding	-0.01347	0.9605	0.3059	0.005724	38.874	45.485	46.924	48.042	35.362	34.616	32.482	37.581	35.852	36.088	38.62	33.197
FBgn0261363	PPO3		protein_coding	-0.8582	0.008256	-0.3006	0.2896	0.532	0.921	0.653	0.447	0.243	0.384	0.418	0.345	1.022	0.637	0.989	0.761
FBgn0001139	gro	TLE3,TLE1,TLE4	protein_coding	-0.01454	0.9529	-0.421	3.322e-08	59.811	58.234	59.289	58.34	83.605	80.594	68.501	78.497	76.203	84.786	81.679	74.786
FBgn0035285	CG12025	TMEM134	protein_coding	-0.008936	0.9832	-0.05285	0.5726	26.599	26.647	30.681	28.368	29.424	27.321	29.492	28.933	27.633	30.423	28.525	30.051
FBgn0035699	CG13300		protein_coding	0.288	0.1059	3.003	5.828e-19	1.439	1.682	1.85	2.081	0.302	0.421	0.515	0.384	0.212	0.171	0.189	0.286
FBgn0037749	CG9471	BLVRB	protein_coding	0.003316	1	0.1121	0.4277	43.914	53.011	52.49	49.609	46.476	46.194	43.273	48.684	48.432	46.813	44.471	43.533
FBgn0028582	lqf		protein_coding	0.01376	0.9605	0.01295	0.9363	25.863	23.03	28.477	27.066	26.251	25.959	28.548	25.593	24.366	26.616	26.042	26.446
FBgn0037758	CG9467	KCTD3,SHKBP1	protein_coding	0.06101	0.5333	-0.09673	0.2693	34.748	28.623	31.706	33.47	36.584	37.694	39.366	35.722	32.433	34.699	35.19	35.386
FBgn0011204	cue		protein_coding	0.02204	0.9184	-0.6001	5.513e-06	89.901	77.721	75.654	79.351	135.523	134.197	131.614	126.779	119.828	130.305	129.62	121.312
FBgn0029830	Grip		protein_coding	-0.06486	0.5566	1.462	5.991e-08	4.368	7.005	7.267	6.843	1.617	1.816	1.571	1.633	2.413	2.268	1.917	2.169
FBgn0083940	RhoU		protein_coding	0.2643	0.04136	1.676	1.545e-30	9.565	9.673	11.758	11.76	4.525	5.15	4.023	4.456	3.146	3.03	3.636	3.471
FBgn0035707	CG8368		protein_coding	0.05193	0.5465	-0.05074	0.4047	40.344	36.408	34.034	36.352	40.044	39.546	42.812	38.329	38.132	37.013	37.885	39.337
FBgn0267972	Der-1	DERL1	protein_coding	-0.0214	0.9192	0.1623	0.04603	50.508	47.654	47.623	49.739	41.206	40.118	42.493	45.385	44.259	43.113	44.722	42.198
FBgn0033134	Tsp42El		protein_coding	0.09227	0.4085	4.739	8.148e-85	20.953	35.106	44.597	29.564	1.171	1.562	2.332	1.535	1.314	1.207	1.024	1.233
FBgn0020445	E23		protein_coding	-0.02046	0.9221	-0.7783	2.111e-06	23.792	20.113	19.907	20.51	35.551	34.253	36.953	34.836	36.373	37.431	38.645	38.399
FBgn0033138	Tsp42Eq		protein_coding	-0.0519	0.577	3.43	0.0006772	0.107	0.144	0.345	0.565	0	0	0	0	0	0	0	0.072
FBgn0264979	CG4267		protein_coding	-0.1518	0.2433	-1.687	5.247e-08	13.615	13.698	12.251	10.323	29.695	23.257	22.818	29.365	56.69	40.771	36.865	33.746
FBgn0014073	Tie		protein_coding	0.0419	0.7315	2.256	2.215e-12	6.002	7.594	11.347	7.828	1.839	2.41	2.281	1.992	1.534	1.604	1.747	1.844
FBgn0028412	Mst33A		protein_coding	0.01026	0.9529	0	1	0	0	0	0	0	0.019	0	0	0	0	0	0
FBgn0040237	bor	ATAD3A	protein_coding	0.101	0.2709	0.4383	1.368e-05	58.542	59.294	50.277	58.099	46.535	47.814	49.848	46.793	43.634	39.36	39.855	42.236
FBgn0028663	VhaM9.7-b		protein_coding	-0.05095	0.6334	0.4205	7.92e-08	93.606	123.086	113.026	108.278	78.727	75.589	73.288	75.956	76.996	82.355	84.65	81.16
FBgn0029137	Patsas		protein_coding	-0.06607	0.5489	-2.341	3.256e-16	0.791	0.471	0.565	0.616	2.61	2.008	2.209	2.747	2.933	3.274	3.514	2.832
FBgn0038532	CG14322		protein_coding	-0.09262	0.3226	-0.6962	1.528e-11	12.174	9.396	10.365	9.856	15.398	14.489	15.726	14.134	15.698	18.506	16.871	17.694
FBgn0034419	CG15111		protein_coding	0.0567	0.5126	0.2655	4.838e-06	36.681	36.05	37.164	35.436	33.987	31.163	30.218	32.717	30.034	29.935	31.984	28.702
FBgn0267495	CR45185		ncRNA	0.02724	0.8504	2.96	5.07e-12	0.859	0.954	1.03	1.404	0.15	0.186	0.152	0.179	0.105	0.126	0.112	0.182
FBgn0261258	rgn		protein_coding	0.7211	0.001134	3.679	3.568e-76	62.235	68.745	105.037	93.762	7.672	13.169	15.297	9.648	5.255	6.721	4.822	8.69
FBgn0011705	rost		protein_coding	0.01113	0.9647	-0.243	0.3341	43.703	42.075	42.284	37.065	53.179	51.006	56.052	57.433	49.589	52.782	51.897	50.503
FBgn0038139	PK2-R2		protein_coding	0.01866	0.8896	5.904	1.121e-07	0.17	0.396	1.078	0.452	0	0.017	0.02	0	0	0	0	0.018
FBgn0038681	Cyp12a4		protein_coding	3.409	1.202e-28	4.124	4.325e-44	3.808	5.065	8.068	8.241	3.809	3.836	4.429	3.197	0.47	0.354	0.302	0.287
FBgn0052409	CG32409	RRS1	protein_coding	-0.06864	0.5113	-0.1626	0.1905	69.978	69.474	55.409	67.31	59.885	64.255	71.046	65.403	77.515	71.692	68.705	77.209
FBgn0263510	nclb		protein_coding	0.06625	0.526	0.7285	4.297e-11	64.226	82.429	57.652	63.947	38.688	43.032	50.536	46.445	45.406	35.442	34.152	43.873
FBgn0036282	Smyd4-2		protein_coding	0.00259	1	4.973	8.213e-17	1.607	2.557	2.933	2.808	0.05	0.081	0.094	0.065	0.053	0.113	0.014	0.095
FBgn0261283	SREBP		protein_coding	0.055	0.6111	0.09457	0.3662	50.15	53.844	58.034	55.957	52.246	53.38	58.891	57.403	49.593	50.194	53.861	50.069
FBgn0035159	CG13896		protein_coding	0.002595	1	-0.07023	0.6976	7.751	7.698	7.391	7.935	9.731	7.46	7.064	8.446	7.512	7.671	9.255	8.043
FBgn0037565	CG9626		protein_coding	0.01443	0.9499	3.836	8.546e-31	31.46	43.615	64.371	51.227	3.782	4.278	3.128	3.097	2.571	3.139	2.922	4.337
FBgn0033876	Syngr		protein_coding	-0.01172	0.9557	2.706	3.064e-06	0.099	0.186	0.183	0.112	0	0.028	0.032	0.009	0.032	0.02	0	0.028
FBgn0019938	RpI1	POLR1A	protein_coding	0.07126	0.4949	0.03728	0.8041	45.779	39.302	42.602	42.605	45.437	48.012	53.011	43.085	38.833	41.279	39.893	45.68
FBgn0038581	CG14314		protein_coding	1.044	0.0009998	2.094	3.837e-12	1.167	2.17	1.717	0.998	0.775	1.002	0.707	0.884	0.426	0.357	0.263	0.336
FBgn0036663	CG9674		protein_coding	0.09235	0.4001	1.095	1.48e-07	39.571	41.619	53.002	48.417	24.263	26.524	29.819	25.073	19.114	18.702	19.458	23.373
FBgn0261859	CG42788		protein_coding	-0.0828	0.4379	1.11	3.078e-11	19.701	22.085	30.374	25.563	8.919	9.443	8.501	8.793	10.243	11.07	11.656	10.71
FBgn0034438	CG9416	ERMP1	protein_coding	0.0483	0.6764	3.951	8.699e-22	11.786	12.213	16.794	20.739	1.153	1.592	1.252	1.365	0.884	0.616	0.767	1.53
FBgn0024956	Mat1	MNAT1	protein_coding	-0.05454	0.5798	-0.3709	2.493e-07	34.484	32.013	30.414	30.759	40.687	38.665	37.107	38.484	42.607	43.123	41.098	38.924
FBgn0051038	CG31038		protein_coding	0.02664	0.86	1.807	7.913e-07	7.953	11.067	15.91	12.529	3.369	4.278	4.238	3.625	3.125	2.767	3.632	3.309
FBgn0031746	CG9029		protein_coding	0.01101	0.9515	1.411	0.06912	0.068	0.138	0.055	0	0	0.045	0	0	0	0	0	0
FBgn0011824	CG4038	GAR1	protein_coding	0.1156	0.2217	0.3502	0.001617	138.915	127.149	122.415	139.633	111.365	124.202	135.437	114.637	96.138	102.306	98.063	113.239
FBgn0034614	CG9752	C9orf64	protein_coding	-0.157	0.107	-0.3451	0.002344	47.498	49.532	37.357	44.279	49.328	45.758	40.261	51.671	59.166	59.054	54.81	56.342
FBgn0011217	eff		protein_coding	0.03746	0.7909	-0.09073	0.3894	255.182	230.466	270.423	240.362	280.358	281.876	287.995	279.745	245.404	272.722	270.726	274.608
FBgn0025628	CG4199		protein_coding	-0.119	0.243	-0.9747	2.658e-13	14.345	19.913	22.309	17.127	30.055	25.362	31.129	34.731	39.769	36.936	37.067	34.919
FBgn0014931	CG2678		protein_coding	-0.002467	1	-0.2176	0.3319	16.722	16.352	17.058	18.848	20.927	20.667	22.166	18.029	17.842	21.009	22.356	21.495
FBgn0035497	CG14995		protein_coding	0.03492	0.8143	0.1908	0.1346	6.802	9.164	12.547	8.851	9.754	8.635	8.174	8.404	7.361	8.347	8.679	8.134
FBgn0026749	Yippee	YPEL5	protein_coding	-0.04234	0.7487	0.1656	0.1758	23.095	26.439	32.389	28.664	22.337	24.318	22.802	20.924	23.344	25.163	25.034	24.562
FBgn0034070	SP2353		protein_coding	0.01626	0.9281	1.142	0.0307	0.018	0.065	0.029	0.047	0.017	0.004	0.036	0.007	0.013	0.017	0	0.016
FBgn0263490	mld		protein_coding	-0.02897	0.8608	-0.52	0.000438	26.005	22.365	23.14	23.403	33.935	32.846	32.075	30.704	32.753	35.34	37.423	34.457
FBgn0026401	Nipped-B		protein_coding	-0.01709	0.9428	-0.4229	0.0116	52.136	43.232	51.229	48.32	66.308	64.602	61.809	62.625	62.806	66.699	70.572	69.424
FBgn0035988	CG3982		protein_coding	0.02324	0.8846	1.465	0.0001061	0.342	0.532	0.404	0.608	0.149	0.19	0.16	0.24	0.098	0.112	0.187	0.212
FBgn0260231	CG42505		protein_coding	0.01055	0.9515	0	1	0	0	0	0	0	0.007	0	0	0	0	0	0
FBgn0260230	CG42504		protein_coding	0.01055	0.9515	0	1	0	0	0	0	0	0.007	0	0	0	0	0	0
FBgn0266581	pit	DDX18	protein_coding	0.00208	1	-0.2266	0.06536	65.03	61.96	55.218	55.846	67.552	71.07	74.192	69.305	70.851	72.2	68.944	68.88
FBgn0001341	l(1)1Bi		protein_coding	0.1286	0.2443	0.1386	0.4589	31.523	26.69	26.464	27.848	31.283	36.623	35.712	28.338	22.966	23.826	23.852	30.376
FBgn0053508	ppk13		protein_coding	6.881	7.861e-15	5.529	2.417e-11	1.111	0.665	1.105	1.643	1.804	3.304	3.81	2.23	0	0.036	0.04	0
FBgn0037518	CG2641		protein_coding	0.03996	0.7658	0.9996	6.778e-08	5.545	6.717	7.405	6.168	3.492	4.378	3.569	2.637	3.055	3.088	3.319	2.839
FBgn0011703	RnrL	RRM1	protein_coding	-0.04151	0.7561	-1.029	2.098e-23	107.375	85.213	79.381	83.514	182.899	170.996	166.659	163.331	172.631	186.545	197.34	179.558
FBgn0262876	CG43231		protein_coding	0	1	0	1	0	0	0	0	0	0	0	0	0	0	0	0
FBgn0038869	Smyd5	SMYD5	protein_coding	-0.01704	0.9453	-0.04244	0.7566	28.366	35.203	28.143	27.087	28.2	27.433	29.756	32.949	34.355	29.545	28.681	29.858
FBgn0033438	Mmp2		protein_coding	0.4398	0.05241	4.026	3.793e-31	23.152	30.965	43.843	37.089	2.648	4.283	6.448	3.084	1.591	2.014	1.866	2.545
FBgn0036109	Cpr67Fa2		protein_coding	-0.0292	0.7831	-0.3311	0.5434	0	0	0	0	0	0	0	0	0	0.097	0	0
FBgn0266948	CR45399		ncRNA	0	1	0	1	0	0	0	0	0	0	0	0	0	0	0	0
FBgn0030061	CG1785	NOP53	protein_coding	-0.1211	0.1721	-0.1905	0.059	57.119	50.422	52.914	52.724	48.993	51.536	62.053	46.244	57.117	62.328	59.381	65.567
FBgn0033507	CG12909		protein_coding	0.01484	0.9515	-0.2466	0.1412	48.211	39.466	38.096	43.427	53.089	57.851	56.797	45.978	46.925	51.106	50.374	55.905
FBgn0039993	CG17691	BCKDHB	protein_coding	-0.01234	0.9644	-0.02797	0.8524	93.338	114.452	93.172	102.66	99.209	99.889	95.404	106.776	114.29	95.198	97.517	104.943
FBgn0029133	REG	PSME3,PSME2,PSME1	protein_coding	0.005259	1	0.1027	0.3042	146.253	157.569	146.365	148.232	142.692	137.182	138.486	142.342	144.477	138.611	132.033	140.856
FBgn0035385	FMRFaR		protein_coding	-0.00178	1	3.567	0.0002928	0.036	0.064	0.14	0.079	0	0.012	0.007	0	0.007	0.006	0	0.006
FBgn0000547	ed		protein_coding	0.009158	0.9801	0.4848	0.006624	50.137	51.345	68.354	64.769	43.605	44.561	38.723	39.455	38.217	40.571	42.24	40.075
FBgn0036813	Atg3	ATG3	protein_coding	-0.007902	0.9894	0.2541	0.001234	45.938	47.308	48.785	48.372	40.531	42.076	38.701	36.059	38.27	41.031	39.914	39.846
FBgn0034243	Ns2	GNL2	protein_coding	0.1245	0.1488	0.2595	0.005519	61.521	63.023	68.652	63.989	57.743	63.9	69.943	57.826	48.114	52.981	53.818	58.718
FBgn0029837	Tsp5D		protein_coding	0.2833	0.1135	3.769	2.053e-10	0.363	0.478	0.573	0.367	0.051	0.083	0.097	0.144	0.095	0	0.014	0.012
FBgn0032346	Csl4	EXOSC1	protein_coding	-0.03982	0.7641	-0.2206	0.01168	42.628	44.646	33.612	38.781	42.866	43.557	46.458	43.246	47.348	46.595	43.976	48.589
FBgn0040491	Buffy		protein_coding	-0.006991	0.9889	1.93	2.995e-06	11.345	22.08	25.604	21.061	4.299	4.988	4.098	5.204	6.2	3.258	4.887	5.417
FBgn0032191	CG5734	SNX17	protein_coding	-0.09017	0.2799	-0.4386	2.65e-08	42.552	41.261	38.646	39.332	50.738	46.211	48.806	51.612	55.414	57.562	57.87	49.869
FBgn0035203	CG9149	ACAT2	protein_coding	-0.06772	0.5286	-0.171	0.2636	59.81	67.745	53.793	58.253	60.607	53.535	54.926	65.026	79.114	65.669	65.489	62.053
FBgn0052580	Muc14A		protein_coding	-0.02516	0.8373	0.9664	0.06942	0.005	0.002	0.006	0.005	0.002	0.002	0	0	0.001	0.002	0.001	0.002
FBgn0033454	CG1671	TBL3	protein_coding	0.07255	0.4516	-0.09042	0.3735	31.218	33.007	31.541	29.971	35.007	35.595	42.343	36.017	34.852	33.509	32.026	33.723
FBgn0026192	par-6	PARD6A,PARD6B,PARD6G	protein_coding	-0.0423	0.7147	-0.5011	3.151e-13	34.3	31.143	36.074	31.293	46.567	44.549	43.738	44.615	44.31	48.527	50.66	45.564
FBgn0044020	Roc2	RNF7	protein_coding	0.1112	0.2433	0.3008	0.008943	33.291	43.363	38.413	36.425	39.066	37.005	31.016	36.951	32.983	30.079	28.88	29.772
FBgn0051015	PH4alphaPV		protein_coding	0.07562	0.4954	0.2456	0.3361	17.479	16.825	17.737	13.202	7.812	14.431	28.64	20.738	15.399	8.983	8.025	19.957
FBgn0030996	CG14194		protein_coding	-0.0009761	1	0.082	0.2003	48.936	47.257	49.625	49.663	47.018	46.667	45.742	44.969	44.783	48.359	47.907	43.566
FBgn0267607	CR45945		ncRNA	0	1	0	1	0	0	0	0	0	0	0	0	0	0	0	0
FBgn0035162	Sf3b3	SF3B3	protein_coding	0.09158	0.3444	0.1626	0.1867	118.096	113.114	111.217	123.735	116.961	127.867	126.203	111.142	94.497	103.192	105.456	110.88
FBgn0037489	CG1234	NOC3L	protein_coding	0.09573	0.3006	-0.2612	0.012	37.031	31.776	33.601	31.463	44.991	47.953	53.305	39.695	37.033	41.142	39.787	43.582
FBgn0036111	Aps	NUDT4,NUDT4B	protein_coding	0.03761	0.7778	-0.09548	0.2541	145.059	132.017	153.537	137.417	165.435	163.176	160.471	150.055	141.353	155.99	154.765	155.708
FBgn0040283	SMC1		protein_coding	-0.2025	0.01441	-0.697	5.51e-18	31.697	26.303	29.373	30.011	45.43	38.823	36.706	37.564	44.063	50.235	51.225	46.637
FBgn0052232	CG32232		protein_coding	0	1	0.276	0.6025	0	0	0	0.009	0	0	0	0	0	0	0	0
FBgn0267298	CR45734		ncRNA	0.01053	0.9515	0.5396	0.3545	0	0	0.228	0	0	0	0	0.086	0	0	0	0
FBgn0267795	Frl		protein_coding	0.8656	3.453e-12	0.6633	1.242e-08	38.185	34.489	43.979	38.558	46.405	41.393	46.013	45.142	21.963	22.534	26.561	25.033
FBgn0053203	CG33203		protein_coding	0.05231	0.6435	2.666	1.313e-11	0.625	0.883	1.643	1.525	0.242	0.209	0.368	0.208	0.158	0.177	0.177	0.206
FBgn0028563	sut1		protein_coding	-0.03192	0.8243	-0.8897	4.211e-05	54.927	49.967	39.516	42.488	81.263	78.394	81.94	84.54	93.088	96.448	92.4	91.328
FBgn0051935	CG31935		protein_coding	-0.001553	1	-0.1649	0.07038	12.803	13.395	14.961	13.936	15.308	14.86	16.539	15.174	14.945	15.946	15.443	15.675
FBgn0015929	dpa	MCM4	protein_coding	-0.09366	0.3045	-0.7324	1.803e-14	64.729	60.21	59.249	60.657	96.187	89.178	85.104	90.227	97.591	104.915	109.748	100.146
FBgn0266568	yar		ncRNA	0	1	0.9693	0.1494	0.019	0.039	0	0	0	0	0	0	0	0	0	0
FBgn0032755	CG17344		protein_coding	-0.01355	0.9337	0.257	0.6353	0	0	0	0.069	0	0	0	0	0	0	0	0.032
FBgn0263982	CG43731		protein_coding	-0.01355	0.9337	0.257	0.6353	0	0	0	0.069	0	0	0	0	0	0	0	0.032
FBgn0011335	vers		protein_coding	0.01159	0.9686	-0.3972	1.358e-06	25.321	24.104	21.19	22.961	34.621	33.922	27.496	29.961	29.962	30.553	32.969	30.476
FBgn0033654	Sobp		protein_coding	0.1561	0.2334	3.057	1.975e-25	7.662	8.831	11.317	12.1	1.324	2.259	2.121	1.703	0.908	1.379	0.837	1.58
FBgn0032123	Oatp30B		protein_coding	0.005251	1	-0.5697	0.0001573	24.094	19.077	19.892	17.937	33.424	33.448	28.214	30.775	29.603	31.431	33.041	29.929
FBgn0025592	Gk1	GK3P,GK2,GK	protein_coding	-0.0266	0.8825	0.2497	0.02634	22.251	24.706	26.904	25.116	19.488	19.538	19.838	19.694	22.237	19.512	19.845	21.029
FBgn0031764	CG9107	RRP7A	protein_coding	0.05669	0.5824	0.4331	2.965e-07	22.457	25.213	20.213	24.088	17.259	19.531	18.536	17.895	17.096	16.196	17.105	17.172
FBgn0039883	RhoGAP100F		protein_coding	0.0663	0.5489	2.913	3.038e-21	3.122	3.249	3.571	3.254	0.473	0.706	0.622	0.551	0.435	0.435	0.302	0.547
FBgn0029525	CG18273		protein_coding	0.1069	0.2164	0.3163	0.000526	29.191	34.899	33.423	33.042	27.074	31.774	33.957	26.902	23.445	26.839	25.883	27.986
FBgn0265785	CG44574		protein_coding	0.01079	0.9515	0.2745	0.6063	0	0	0.063	0	0	0	0.059	0	0	0	0	0
FBgn0030177	CG2972	NOB1	protein_coding	0.06891	0.4434	-0.3268	1.123e-05	53.774	48.805	44.189	46.644	65.268	65.995	68.918	65.06	58.546	62.023	62.444	60.553
FBgn0038603	PKD		protein_coding	0.2169	0.1607	6.663	7.51e-34	1.258	2.018	3.122	1.895	0.05	0.087	0.047	0.016	0.026	0.013	0.014	0.018
FBgn0030955	CG6891	COTL1	protein_coding	0.1601	0.1823	3.384	1.822e-69	125.136	176.779	177.681	225.835	19.734	22.982	22.841	26.407	16.921	14.499	12.329	23.246
FBgn0026064	KP78a		protein_coding	0.5161	0.03085	4.192	2.705e-52	1.065	1.281	2.049	1.108	0.108	0.141	0.169	0.159	0.051	0.071	0.079	0.093
FBgn0026063	KP78b		protein_coding	0.5161	0.03085	4.192	2.705e-52	1.065	1.281	2.049	1.108	0.108	0.141	0.169	0.159	0.051	0.071	0.079	0.093
FBgn0030587	CG9522		protein_coding	-0.001713	1	2.948	0.00343	0.017	0.035	0.028	0.101	0	0	0	0.011	0.013	0	0	0
FBgn0015789	Rab10		protein_coding	-0.006736	0.9945	0.09504	0.2751	114.197	114.273	128.505	119.472	107.963	112.556	111.083	109.586	109.538	116.654	109.806	109.4
FBgn0038275	CG3817		protein_coding	0.03719	0.7957	0.092	0.4964	39.67	36.733	35.24	35.844	37.503	38.402	40.104	32.792	31.747	35.06	32.6	38.379
FBgn0036502	CG7841		protein_coding	-0.02861	0.8499	-0.8936	0.0001647	15.947	14.483	12.406	11.765	25.199	21.692	23.586	26.315	27.443	27.741	29.045	26.778
FBgn0284421	Psn		protein_coding	0.03564	0.7936	0.3797	1.422e-07	49.362	54.5	61.014	55.303	43.971	45.753	42.775	43.825	43.269	42.093	42.093	41.006
FBgn0029711	Usf		protein_coding	-0.1543	0.0898	0.1015	0.3502	18.784	17.34	19.295	20.058	14.52	13.891	15.964	14	16.596	18.383	17.13	18.072
FBgn0013343	Syx1A	STX4,STX3,STX1B,STX19,STX11,STX2,STX1A	protein_coding	0.006915	0.993	0.8681	1.715e-08	24.122	27.112	33.602	30.578	15.372	15.851	15.938	15.041	14.183	14.953	15.446	16.376
FBgn0261458	capt	CAP2,CAP1	protein_coding	0.0163	0.9499	0.4959	1.205e-07	107.963	121.606	125.868	135.915	87.076	86.925	82.975	97.264	87.936	90.311	84.262	82.287
FBgn0087007	bbg		protein_coding	0.2828	0.03164	0.9185	1.218e-10	7.115	5.675	7.012	6.81	4.064	4.647	5.81	4.279	3.121	3.421	2.897	4.209
FBgn0039212	Syx18	STX18	protein_coding	-0.04594	0.7007	-0.428	2.603e-06	29.644	29.372	26.014	27.178	35.163	34.268	33.719	38.67	40.343	38.696	37.482	35.68
FBgn0039189	CG18528	GTPBP3	protein_coding	-0.03891	0.7812	-0.1528	0.3018	18.798	21.483	16.837	17.546	20.121	17.996	18.165	19.99	22.223	21.479	21.187	18.735
FBgn0032906	RPA2		protein_coding	-0.3203	0.003646	-0.6661	1.927e-10	81.194	94.597	72.47	76.37	102.162	97.354	86.613	108.338	142.17	130.612	133.166	117.226
FBgn0038292	CG3987		protein_coding	-0.1194	0.2993	2.967	0.0001037	1.186	1.827	2.945	2.162	0.036	0.102	0.059	0.063	0.038	0.092	0.02	0.727
FBgn0037713	CG16790	USB1	protein_coding	-0.009344	0.9794	-0.1992	0.2758	8.48	9.792	8.859	9.302	9.707	11.932	9.012	10.577	11.135	10.426	10.721	10.265
FBgn0052579	CG32579		protein_coding	-0.07999	0.3911	-0.3526	0.0001692	27.366	28.393	26.479	24.132	30.18	29.21	28.936	33.581	38.985	33.914	33.35	30.551
FBgn0036043	CG8177		protein_coding	0.01825	0.9332	-0.2192	0.3273	30.416	24.308	27.764	25.871	33.75	35.445	39.001	32.777	30.808	31.267	32.18	35.794
FBgn0034443	cer		protein_coding	0.06555	0.5477	2.179	1.669e-39	159.555	225.67	232.786	238.063	50.821	48.6	65.769	57.621	47.039	43.625	47.267	50.211
FBgn0265276	l(3)neo38		protein_coding	0.03634	0.7835	2.162	5.691e-11	7.44	10.264	13.23	10.755	2.25	2.976	3.578	2.512	2.013	2.177	2.149	2.77
FBgn0259789	zld		protein_coding	0.02424	0.9019	-0.8765	1.621e-13	18.25	16.848	13.778	13.656	32.117	31.666	27.842	31.829	30.862	29.602	28.424	28.395
FBgn0020372	TM4SF		protein_coding	0.08018	0.4766	3.694	8.371e-31	4.589	5.569	6.697	7.032	0.567	0.713	0.766	0.574	0.421	0.235	0.496	0.644
FBgn0045800	Uhg1		ncRNA	0.07462	0.4915	0.4166	0.0197	34.896	35.371	39.789	35.319	23.793	32.285	43.878	29.163	21.604	26.197	25.715	31.628
FBgn0034447	CG7744		protein_coding	-0.1897	0.07686	-1.516	1.955e-34	31.312	27.183	24.757	22.335	72.906	60.284	48.506	57.842	72.439	76.605	82	73.536
FBgn0262018	CadN2		protein_coding	0.03786	0.704	2.981	0.002624	0.029	0.034	0.035	0.028	0.01	0	0.011	0.006	0	0	0	0.01
FBgn0030418	CG4004		protein_coding	0.03145	0.8373	0.7656	5.754e-08	8.554	9.247	10.612	10.794	6.891	6.13	5.281	5.928	5.741	5.731	5.797	5.109
FBgn0050417	tbrd-3		protein_coding	0	1	3.911	0.0004594	0.272	0	0.22	0.098	0	0	0	0	0	0	0	0
FBgn0040290	RecQ4	RECQL4	protein_coding	-0.05759	0.6	-0.9673	7.359e-17	26.038	20.444	20.548	20.072	41.458	38.552	37.571	38.118	40.541	44.747	46.278	42.109
FBgn0039381	SppL	SPPL3	protein_coding	-0.02422	0.8903	-0.1484	0.03793	31.766	31.711	34.328	32.804	35.514	32.932	34.862	37.494	35.878	38.081	36.79	34.326
FBgn0038381	EndoU		protein_coding	-0.02246	0.9143	-0.5864	1.532e-05	18.594	17.793	17.757	15.205	25.251	25.409	26.725	23.679	24.39	27.935	27.68	26.735
FBgn0032450	CG5776	SPATA5	protein_coding	-0.09525	0.2527	-0.9415	6.707e-32	24.686	19.848	18.894	18.61	34.936	34.619	37.052	34.574	38.868	40.458	41.696	37.92
FBgn0037671	VhaM8.9	ATP6AP2	protein_coding	-0.009475	0.9799	0.4068	8.337e-08	160.179	194.578	206.492	196.232	136.928	133.086	144.971	145.85	147.517	142.232	139.786	138.601
FBgn0062565	Or19b		protein_coding	0	1	0	1	0	0	0	0	0	0	0	0	0	0	0	0
FBgn0037515	Sp7		protein_coding	-0.04821	0.6838	-1.111	1.125e-06	2.934	3.623	3.382	2.447	6.704	6.082	4.888	5.938	9.412	8.117	5.219	5.877
FBgn0040227	eIF3d1	EIF3D	protein_coding	0.1427	0.02685	0.07923	0.244	212.039	216.975	206.578	206.446	214.166	231.544	247.27	218.755	192.011	202.319	192.381	209.602
FBgn0032713	CG17323		protein_coding	0.2057	0.1229	2.844	1.058e-45	15.748	25.68	33.045	25.791	3.507	5.082	5.929	5.383	3.53	3.452	2.588	4.277
FBgn0261700	CR42736		ncRNA	0.02523	0.8192	1.299	0.08795	0.071	0	0.171	0	0.05	0	0.054	0	0	0	0	0
FBgn0000181	bic	BTF3L4	protein_coding	0.01871	0.9371	0.08032	0.5363	755.073	878.606	750.934	790.144	728.671	740.134	780.264	860.403	808.361	740.883	707.084	737.851
FBgn0026323	Tak1		protein_coding	-0.4598	4.178e-08	-0.2961	0.0002303	21.208	22.752	24.594	21.109	19.852	20.651	20.543	17.836	26.568	29.244	28.326	26.495
FBgn0029148	NHP2	NHP2	protein_coding	0.1095	0.2912	0.6876	1.803e-06	171.542	204.73	155.157	190.669	125.484	136.164	138.131	136.357	114.521	97.53	94.181	128.304
FBgn0030170	CG2990		protein_coding	-0.05633	0.6165	-1.104	1.027e-16	11.804	9.356	8.755	8.457	19.583	18.085	19.008	18.004	20.241	20.704	22.111	21.275
FBgn0036299	Tsf2		protein_coding	-0.01517	0.9515	0.01742	0.9001	43.339	43.078	54.079	44.427	44.596	44.264	44.316	44.499	44.036	47.49	48.339	42.784
FBgn0250791	alphaSnap	NAPA,NAPB	protein_coding	0.0331	0.7851	0.5501	1.713e-26	65.553	65.143	66.95	70.91	45.28	47.695	47.598	48.601	44.639	47.166	43.63	47.379
FBgn0030701	CG16952	BTBD7	protein_coding	-0.03538	0.7875	-0.1352	0.04926	28.205	27.986	29.283	30.35	30.012	30.36	30.881	30.974	30.993	31.75	33.063	31.636
FBgn0053970	CG33970		protein_coding	0.1881	0.1913	0.7866	0.006434	4.485	2.729	5.565	5.571	1.719	4.181	4.954	5.106	1.881	2.164	1.533	3.6
FBgn0264302	CG43780		protein_coding	-0.002551	1	0.2001	0.08573	67.753	70.066	89.938	77.83	68.137	66.07	64.337	64.459	63.841	65.625	67.971	66.896
FBgn0264303	CG43781		protein_coding	-0.002551	1	0.2001	0.08573	67.753	70.066	89.938	77.83	68.137	66.07	64.337	64.459	63.841	65.625	67.971	66.896
FBgn0020278	loco		protein_coding	0.08377	0.3623	0.5966	8.558e-11	12.147	12.582	15.07	14.592	9.511	10.462	10.623	9.503	8.634	8.934	8.935	9.067
FBgn0002525	Lam		protein_coding	-0.009356	0.981	-0.3093	0.0004406	66.402	61.145	65.085	62.287	79.421	78.248	77.164	78.408	73.852	83.006	80.663	80.258
FBgn0039827	CG1544	DHTKD1	protein_coding	-0.0233	0.8818	0.5818	0.09919	0.665	1.122	1.257	1.131	0.406	0.566	0.388	0.326	0.631	0.642	0.463	0.42
FBgn0034657	LBR		protein_coding	0.007907	0.9897	-0.3062	0.00695	29.499	27.692	26.098	28.501	36.515	39.637	31.272	34.361	34.884	33.615	36.597	34.508
FBgn0039507	mrt		protein_coding	-0.0117	0.9686	-0.2744	0.03298	19.314	18.038	19.781	19.533	23.182	22.589	24.73	20.887	21.508	23.58	25.127	23.594
FBgn0020909	Rtc1	RCL1	protein_coding	0.0328	0.8273	-0.009916	0.9426	40.292	46.928	34.857	38.918	39.702	45.246	41.225	44.489	45.92	38.466	38.434	39.192
FBgn0033589	CG13227		protein_coding	0.0875	0.4356	0.8604	0.03407	0.834	0.691	0.369	0.603	0.268	0.748	0.52	0.416	0.226	0.216	0.24	0.306
FBgn0037051	CG10565		protein_coding	0.009598	0.9735	-0.2631	4.614e-06	114.147	108.153	104.034	103.734	131.41	133.05	133.384	124.78	128.375	133.997	126.562	128.228
FBgn0261046	Dscam3		protein_coding	0.6248	0.01601	4.951	1.441e-77	1.743	1.928	2.325	2.136	0.149	0.109	0.133	0.118	0.057	0.074	0.046	0.078
FBgn0031020	Naa15-16	NAA16,NAA15	protein_coding	0.02937	0.8509	-0.2862	0.000178	112.37	103.045	96.463	100.317	134.305	125.697	133.52	131.405	124.212	129.721	127.191	123.603
FBgn0013770	Cp1		protein_coding	0.0002401	1	0.6862	5.091e-12	559.196	547.242	656.64	640.445	357.16	339.924	393.552	382.169	347.534	365.231	377.307	382.089
FBgn0039182	CG5728		protein_coding	-0.03411	0.8192	-0.2847	0.02089	50.205	39.101	40.131	42.856	48.188	51.726	53.879	43.87	48.178	53.748	53.452	56.786
FBgn0264384	CR43836		ncRNA	0.0179	0.9371	-0.7374	7.723e-05	4.362	3.576	3.284	3.547	7.109	8.196	7.062	5.341	6.638	6.29	6.383	6.669
FBgn0032925	CG9246	NOC2L	protein_coding	-0.01073	0.9726	-0.4843	0.0003314	72.184	58.194	58.104	59.46	84.929	90.73	90.897	78.69	84.628	91.227	84.296	94.32
FBgn0014879	Set		protein_coding	0.01073	0.9726	-0.2961	0.001056	194.738	174.699	155.436	160.531	226.452	223.716	211.558	199.227	209.217	215.448	210.591	211.277
FBgn0263706	CG43658		protein_coding	-0.005793	1	0.5822	6.014e-06	13.32	15.43	18.969	16.433	9.986	9.927	10.651	10.765	10.401	10.571	10.63	10.295
FBgn0086604	CG12484		protein_coding	0.04761	0.6817	4.275	3.367e-25	1.305	2.137	2.621	2.479	0.108	0.173	0.169	0.148	0.114	0.099	0.066	0.14
FBgn0036423	CG3919		protein_coding	0.00942	0.9757	-0.516	0.01449	6.744	6.03	5.926	5.366	10.906	10.905	7.977	8.313	8.425	9.582	9.814	8.747
FBgn0260482	CG32599		protein_coding	0.006557	0.9902	4.278	3.945e-15	4.248	17.678	13.616	9.414	0.329	0.836	0.543	0.585	0.624	0.553	0.465	0.479
FBgn0030893	RhoGAP16F		protein_coding	0.02599	0.8788	0.7204	0.0001492	2.22	2.446	3.252	3.068	1.424	1.626	2.016	1.884	1.388	1.419	1.426	2.07
FBgn0037551	Gie		protein_coding	-0.04323	0.719	0.4528	5.904e-09	35.7	37.778	43.441	36.114	26.545	27.448	26.099	24.654	26.273	27.545	27.876	29.374
FBgn0014000	Hf		protein_coding	0.005304	0.9997	4.708	4.325e-42	3.2	12.66	9.715	8.884	0.241	0.337	0.325	0.416	0.445	0.396	0.135	0.287
FBgn0284251	l(2)05287		protein_coding	-0.001751	1	-0.4412	2.606e-05	40.151	32.938	33.376	35.704	47.144	51.985	51.149	44.459	45.712	50.946	48.62	50.083
FBgn0003435	sm	HNRNPLL,HNRNPL	protein_coding	0.05497	0.6245	1.388	9.615e-06	3.609	4.026	5.771	4.418	1.725	2.133	2.567	1.961	1.464	1.397	1.309	2.068
FBgn0024836	stan		protein_coding	2.413	0.001919	8.389	5.184e-33	1.249	1.736	3.744	1.646	0.01	0.041	0.09	0.012	0.002	0.004	0.004	0.008
FBgn0031762	CG9098	BCAR3	protein_coding	0.04288	0.7245	0.2191	0.4142	3.11	3.717	3.725	5.1	3.058	4.544	4.7	3.775	2.946	2.989	2.714	4.149
FBgn0259821	CG42402		protein_coding	1.799	4.857e-06	4.016	1.457e-29	0.884	0.734	0.894	0.983	0.128	0.258	0.242	0.207	0.062	0.048	0.048	0.051
FBgn0021944	Coprox	CPOX	protein_coding	-0.02085	0.9228	-0.4253	9.411e-05	47.878	43.861	47.593	49.115	67.727	57.808	58.961	61.833	62.25	66.851	66.75	60.466
FBgn0039113	CG10217		protein_coding	0.006067	1	0.1386	0.2675	60.395	64.662	74.016	61.434	60.446	60.858	57.725	59.39	58.814	59.042	60.67	56.943
FBgn0039026	CG7029		protein_coding	-0.03649	0.8007	-0.05977	0.7002	22.572	22.24	26.508	22.271	24.253	23.503	21.009	21.265	22.936	25.524	26.13	23.247
FBgn0086251	del		protein_coding	-0.08384	0.4009	-1.082	1.439e-20	37.747	27.331	31.023	27.294	59.943	56.942	60.594	52.414	62.461	64.345	70.782	68.295
FBgn0050359	Mal-A5		protein_coding	-0.004014	1	-0.4432	0.097	50.203	62.77	70.086	51.739	90.121	85.759	84.143	83.76	83.502	90.185	88.976	90.176
FBgn0052152	CG32152		protein_coding	-0.03935	0.7748	-0.1731	0.115	21.205	19.163	23.545	21.68	22.503	21.732	23.044	23.245	23.103	25.678	25.077	23.159
FBgn0032049	Bace		protein_coding	-1.68	0.02017	-0.4824	0.4303	0.162	0.027	1.007	0.547	0.019	0	0	0.033	0	0	0	5.697
FBgn0020633	Mcm7	MCM7	protein_coding	-0.04256	0.7478	-0.9108	2.668e-12	62.57	63.767	55.329	58.918	111.945	113.736	89.61	106.648	116.074	118.769	121.988	107.273
FBgn0033548	CG7637	NOP10	protein_coding	-0.05345	0.6442	0.2091	0.169	136.967	161.477	104.789	135.565	90.97	101.97	115.426	96.741	128.95	106.845	100.714	123.738
FBgn0004133	blow		protein_coding	0.1011	0.3294	2.684	2.176e-69	21.883	28.166	34.293	33.984	4.814	6.195	5.677	5.911	3.919	4.443	5.153	4.823
FBgn0266685	CR45175		ncRNA	0.07113	0.5252	0.6126	0.03945	1.883	2.262	2.555	2.564	1.735	1.756	1.235	2.934	2.055	1.125	0.934	1.059
FBgn0284257	Ttd14		protein_coding	0.08137	0.3567	-0.1316	0.1418	72.794	61.37	71.284	70.129	80.884	76.769	91.235	88.078	74.685	72.384	75.335	80.259
FBgn0027080	TyrRS	YARS	protein_coding	0.1523	0.06854	0.1684	0.06211	98.836	109.238	90.426	94.524	97.819	100.467	107.255	106.566	88.272	85.42	81.788	92.983
FBgn0013763	Idgf6		protein_coding	-0.02375	0.8857	0.04448	0.8917	120.024	154.583	164.954	139.7	123.164	126.81	107.749	122.134	137.392	139.644	140.655	137.655
FBgn0024556	mEFTu1	TUFM	protein_coding	0.1064	0.2044	0.1611	0.07293	149.817	163.079	129.031	144.071	140.635	143.334	156	156.607	140.902	124.89	122.208	134.369
FBgn0039089	beat-IV		protein_coding	-0.01399	0.9293	2.127	0.02118	0.046	0.069	0.028	0.016	0.008	0	0	0	0	0.008	0.009	0
FBgn0037217	CG14636		protein_coding	2.562	2.114e-09	2.358	3.922e-09	1.339	1.642	1.877	1.266	0.692	3.216	2.472	0.831	0.23	0.588	0.163	0.173
FBgn0036035	CG18178		protein_coding	-0.00207	1	-0.1804	0.1746	47.691	45.601	46.937	46.035	58.38	55.603	50.349	47.401	50.386	53.961	50.433	57.913
FBgn0033494	KCNQ		protein_coding	0.07302	0.5091	2.894	7.376e-08	4.924	6.544	8.098	6.883	0.775	1.213	2.113	1.887	0.735	0.795	0.6	1.219
FBgn0032895	twit		protein_coding	0.03548	0.7725	4.074	2.323e-11	3.857	4.478	5.791	5.96	0.259	0.328	0.583	0.486	0.347	0.237	0.105	0.38
FBgn0087011	CG41520		protein_coding	2.169	9.369e-12	3.427	8.675e-31	1.716	2.431	3.658	2.499	0.871	1.104	1.412	1.068	0.269	0.24	0.196	0.234
FBgn0033913	CG8468		protein_coding	0.1033	0.3719	5.063	4.649e-22	0.647	1.095	1.681	1.514	0.041	0.146	0.051	0.041	0.05	0.021	0.038	0.026
FBgn0259244	CG42342		protein_coding	0.2673	0.1008	4.752	2.364e-80	3.258	4.486	4.617	4.473	0.236	0.269	0.311	0.19	0.136	0.138	0.115	0.22
FBgn0031252	CG13690	RNASEH2A	protein_coding	-0.09668	0.3279	-0.7299	3.776e-09	39.74	41.987	32.272	33.351	57.236	50.496	43.043	60.222	63.585	65.954	66.533	53.896
FBgn0001227	Hsp67Ba		protein_coding	0.01583	0.9371	5.725	4.785e-24	15.312	24.083	26.901	27.383	0.484	0.522	0.387	0.497	0.444	0.472	0.296	0.341
FBgn0034075	Asph		protein_coding	0.04022	0.7528	0.7462	0.003456	11.58	10.692	13.837	11.542	7.136	10.212	6.595	7.343	5.192	5.36	7.053	7.813
FBgn0005671	Vha55	ATP6V1B2	protein_coding	0.04341	0.7237	0.1131	0.2243	242.706	241.769	281.974	276.735	252.413	245.282	273.524	254.362	226.607	238.255	239.761	257.836
FBgn0028484	Ack	TNK2	protein_coding	-0.001541	1	-0.3207	0.0001345	18.112	18.419	19.179	16.565	23.269	23.538	22.137	21.618	21.468	23.46	24.875	20.975
FBgn0041721	snRNA:U12		snRNA	-0.1868	0.1942	0.04421	0.8986	17.029	28.63	14.447	16.374	12.953	10.878	6.12	11.152	20.579	19.939	19.284	13.268
FBgn0038601	CG18600		protein_coding	0.03511	0.8107	-0.01948	0.8826	41.885	46.026	38.183	38.798	41.922	43.728	45.451	46.368	48.311	39.134	38.374	41.307
FBgn0051720	mthl15		protein_coding	0.01396	0.95	0.6172	0.06333	0.216	0.218	0.36	0.38	0.105	0.177	0.257	0.172	0.11	0.154	0.213	0.145
FBgn0259140	CG42255	CUBN	protein_coding	0.2061	0.173	2.807	1.83e-15	0.423	0.46	0.515	0.333	0.077	0.092	0.169	0.102	0.033	0.078	0.03	0.099
FBgn0030000	CG2260	WDR46	protein_coding	-0.01401	0.9605	0.0701	0.5696	36.193	37.228	32.413	36.147	30.781	32.785	35.631	32.217	33.619	33.029	33.766	34.514
FBgn0034703	CG3045	PUS3	protein_coding	-0.01124	0.9706	-0.5268	1.162e-05	18.14	15.179	15.013	13.927	22.083	23.079	22.651	21.295	21.917	22.467	24.076	22.818
FBgn0037248	srl		protein_coding	-0.03242	0.8291	-0.9787	2.416e-09	70.852	52.693	53.464	54.275	111.748	104.913	107.941	106.096	109.926	124.37	124.429	115.499
FBgn0259992	CG42489		protein_coding	0.04532	0.6826	3.761	5.001e-10	1.278	2.883	2.26	2.31	0.164	0.306	0.487	0.071	0.13	0.166	0.046	0.234
FBgn0035336	CG9004	NOM1	protein_coding	0.02978	0.855	-0.3322	0.0003988	18.355	14.268	15.877	17.422	22.849	21.904	22.312	20.652	20.652	18.843	21.108	23.019
FBgn0016917	Stat92E	STAT5B,STAT5A,STAT6	protein_coding	0.002139	1	0.04462	0.7668	53.411	50.568	57.79	55.647	56.967	57.732	47.167	49.546	49.457	52.676	55.528	52.742
FBgn0032943	Tsp39D		protein_coding	-0.05731	0.6078	-0.01314	0.9479	19.677	21.713	23.084	21.803	20.027	19.36	16.623	20.874	23.345	21.862	21.005	20.929
FBgn0037183	CG14451		protein_coding	0.396	0.07267	2.978	4.604e-10	0.665	1.078	1.437	1.058	0.22	0.321	0.507	0.351	0.066	0.158	0.175	0.119
FBgn0260005	wtrw		protein_coding	0.1292	0.2912	-0.07099	0.8104	1.55	2.048	1.809	2.133	2.719	2.417	3.602	3.593	2.523	1.705	1.625	2.199
FBgn0262617	CG43143		protein_coding	0.008658	0.9827	0.9369	7.974e-07	6.57	7.385	10.213	8.496	4.03	4.238	4.343	4.073	3.905	3.86	4.287	4.097
FBgn0039487	gb		protein_coding	0.01126	0.9706	-0.5773	1.788e-07	23.986	19.497	21.701	22.11	32.544	32.336	37.083	33.444	30.572	34.486	33.14	34.219
FBgn0041625	Or65a		protein_coding	-0.01508	0.9212	-0.1215	0.8191	0.03	0	0	0	0	0	0.023	0	0.045	0	0	0
FBgn0031360	CG31937	DHRS7	protein_coding	0.008802	0.9828	0.05594	0.7692	50.054	76.155	59.283	60.714	59.476	58.484	59.054	65.207	69.144	57.769	55.06	53.885
FBgn0032897	CG9336		protein_coding	0.02079	0.9147	2.767	4.532e-26	229.979	464.198	466.372	367.507	65.69	68.932	51.418	59.857	59.04	55.664	59.226	47.739
FBgn0039828	CG1542	EBNA1BP2	protein_coding	0.04976	0.6741	-0.1733	0.1249	82.805	79.195	65.724	74.716	95.714	94.145	93.386	90.932	90.074	85.726	82.18	84.764
FBgn0032779	CG16771		protein_coding	-0.09383	0.3764	0.6606	5.029e-05	2.989	4.159	4.224	4.742	2.042	1.973	1.739	2.119	2.286	2.645	2.226	2.651
FBgn0030870	CG6398		protein_coding	-0.0002223	1	-0.1206	0.7094	48.297	52.772	47.862	50.721	61.354	60.529	49.491	55.066	55.622	57.836	59.288	54.108
FBgn0039930	CG11077	MPV17	protein_coding	0.01501	0.9515	0.1592	0.2063	32.391	41.026	37.288	42.08	33.262	36.622	33.374	37.11	34.237	37.038	30.283	34.493
FBgn0051145	CG31145	FAM20C	protein_coding	0.08271	0.4482	1.281	7.284e-10	11.142	10.405	13.706	14.028	4.545	5.972	7.965	6.427	4.624	4.66	3.969	6.158
FBgn0027783	SMC2	SMC2	protein_coding	-0.06204	0.5161	-0.8298	8.073e-29	23.645	21.834	21.901	20.395	39.597	38.056	33.349	34.312	37.265	39.452	41.209	39.36
FBgn0036519	CG7650		protein_coding	-0.8822	1.217e-13	-0.7794	4.095e-12	17.16	16.892	17.055	16.336	19.976	14.407	13.162	15.189	28.747	30.99	33.376	24.925
FBgn0026404	Dronc		protein_coding	-0.06132	0.5591	-0.2652	0.01122	43.187	41.713	41.767	38.912	47.08	47.824	40.801	45.479	53.729	49.279	52.523	44.901
FBgn0262515	VhaAC45		protein_coding	0.0362	0.7875	0.496	1.111e-12	134.477	147.687	171.006	164.165	111.973	110.152	116.634	116.818	105.541	109.102	106.995	113.639
FBgn0032863	Cdc23	CDC23	protein_coding	-0.1018	0.2942	-0.5466	2.771e-06	14.081	13.644	12.568	13.04	17.536	16.476	16.453	16.749	19.669	20.785	20.698	18.119
FBgn0001098	Gdh	GLUD2,GLUD1	protein_coding	0.01034	0.9741	0.761	2.051e-09	189.052	181.464	195.149	240.4	117.601	117.509	118.162	122.087	109.818	116.911	116.695	120.655
FBgn0031117	GstT3		protein_coding	0.0821	0.4289	-0.006428	0.9859	20.556	24.632	24.029	24.549	27.043	28.513	28.112	27.687	23.795	25.758	21.483	23.198
FBgn0032138	CG4364	PES1	protein_coding	0.119	0.2346	0.06756	0.6448	181.129	215.139	197.333	176.315	206.437	233.251	233.683	215.562	185.894	180.184	175.413	190.983
FBgn0038516	P5cr-2	PYCR3	protein_coding	0.06023	0.5803	3.656	1.235e-14	0.658	1.386	2.261	1.294	0.149	0.19	0.181	0.176	0.137	0.113	0.083	0.088
FBgn0029755	Sas10	UTP3	protein_coding	0.0483	0.6826	-0.1854	0.07068	36.878	36.061	29.877	33.388	39.483	44.601	43.954	40.195	37.088	40.917	37.149	40.356
FBgn0259483	Mob4	HSPE1-MOB4,MOB4	protein_coding	-0.09895	0.1343	-0.1739	0.003853	75.182	73.521	77.136	81.072	83.347	74.875	76.081	79.759	85.666	89.046	89.399	82.873
FBgn0031526	CG8838		protein_coding	-0.01031	0.9668	0.4302	0.1742	0.393	0.239	0.414	0.739	0.195	0.31	0.269	0.263	0.468	0.252	0.217	0.211
FBgn0264835	CR44043		ncRNA	3.457	6.853e-19	2.964	4.273e-15	0.678	0.858	1.473	1.003	1.973	1.094	0.892	1.699	0.069	0.187	0.097	0.145
FBgn0038638	CG7702		protein_coding	0.1327	0.2718	4.077	2.14e-54	27.642	31.259	36.684	44.043	2.419	2.509	4.484	2.557	1.741	2.269	1.306	2.787
FBgn0263116	5-HT1B		protein_coding	0.04769	0.6123	4.833	5.462e-06	0.199	0.067	0.131	0.213	0	0.025	0	0.017	0	0	0	0.013
FBgn0036782	CG7320		protein_coding	-0.001822	1	1.189	0.09018	0.057	0.019	0.031	0.041	0	0	0.014	0.012	0.014	0	0.015	0
FBgn0020305	dbe	KRR1	protein_coding	-0.01748	0.943	-0.2107	0.02112	38.848	39.663	35.08	40.139	46.806	45.539	40.098	41.457	46.041	44.878	46.146	41.62
FBgn0085422	CG34393		protein_coding	0	1	0	1	0	0	0	0	0	0	0	0	0	0	0	0
FBgn0040968	CG14933		protein_coding	0.01328	0.9511	4.313	6.236e-12	9.68	19.145	25.774	15.72	0.502	0.785	1.524	0.963	0.577	0.99	0.637	0.932
FBgn0001229	Hsp67Bc		protein_coding	0.003098	1	5.927	2.862e-17	1.859	13.219	10.325	1.988	0.055	0.127	0.03	0.165	0.029	0.028	0.122	0.182
FBgn0031413	CG9967		protein_coding	0.04266	0.7449	-0.05344	0.6982	13.681	15.373	14.576	13.92	16.305	16.719	14.918	17.054	16.21	15.495	15.004	13.132
FBgn0036460	CG5114		protein_coding	0.1138	0.2359	0.2756	0.01839	49.552	55.492	47.806	50.153	45.991	48.644	52.226	50.585	42.068	40.017	38.328	45.665
FBgn0263740	eIF2gamma		protein_coding	0.09486	0.2351	0.02247	0.8103	163.873	151.434	147.329	154.034	160.895	165.331	187.719	164.606	143.062	154.794	148.494	160.535
FBgn0031632	CG15628		protein_coding	0.1161	0.3196	3.907	2.625e-09	0.865	0.955	1.457	0.633	0.089	0.16	0.245	0.095	0.043	0.035	0.061	0.091
FBgn0014861	Mcm2	MCM2	protein_coding	-0.05565	0.6243	-0.9659	1.956e-10	57.286	54.8	49.467	49.229	94.613	92.819	90.757	92.295	104.606	109.955	107.86	103.564
FBgn0041182	Tep2		protein_coding	-0.07078	0.526	2.948	4.338e-18	8.59	7.556	12.008	8.754	0.68	0.875	1.085	0.621	1.12	1.104	0.914	1.534
FBgn0034315	CG5721	ARMC6	protein_coding	-0.03944	0.7763	0.194	0.1344	57.579	68.725	61.681	64.218	49.846	47.019	50.096	54.404	59.316	54.817	54.015	50.594
FBgn0004456	mew		protein_coding	0.0872	0.4368	2.698	4.06e-21	23.261	23.509	35.142	33.411	4.308	6.274	8.033	5.946	3.092	4.455	4.183	5.772
FBgn0064225	RpL5	RPL5	protein_coding	0.08282	0.3928	0.2318	0.0349	772.629	804.833	811.931	790.895	723.529	764.828	816.299	764.721	632.316	686.015	641.182	729.855
FBgn0267385	PyK		protein_coding	0.01119	0.9707	-0.2729	0.008317	310.107	326.282	300.944	298.173	393.858	357.118	376.003	407.124	369.214	384.305	391.122	359.148
FBgn0033359	CG8213		protein_coding	0.009773	0.9605	3.882	0.0001652	0.029	0.041	0.051	0.054	0	0.004	0.004	0.004	0.004	0	0	0.004
FBgn0034733	CG4752	OPLAH	protein_coding	-0.02108	0.9192	-1.37	2.418e-13	2.833	4.884	6.265	5.002	12.029	11.564	11.383	12.099	14.07	12.561	12.418	11.561
FBgn0034093	CG15706		protein_coding	-0.06506	0.546	-0.1916	0.1724	8.58	7.283	8.654	8.008	7.808	8.178	8.512	8.244	9.196	9.864	9.428	9.011
FBgn0052364	tut		protein_coding	0.06336	0.5683	0.4616	0.07949	32.971	33.867	26.682	23.225	21.278	26.576	24.677	31.919	20.771	21.249	20.034	14.702
FBgn0029911	CG14435	ZNRF2	protein_coding	-0.005678	1	-0.2323	0.02637	24.412	21.99	25.445	23.288	28.01	26.775	29.209	27.355	26.089	30.056	28.666	27.664
FBgn0039696	CG7837		protein_coding	-0.06094	0.5737	-0.522	1.29e-05	12.095	10.984	11.447	11.246	16.09	15.926	13.469	14.045	15.897	16.736	18.75	15.544
FBgn0261609	eIF2alpha	EIF2S1	protein_coding	0.05069	0.6435	0.1162	0.1954	182.213	200.356	157.897	171.522	165.462	169.438	189.395	179.486	175.407	160.814	160.219	158.945
FBgn0016983	smid	NVL	protein_coding	0.06515	0.4791	-0.1911	0.01193	89.704	81.707	88.71	84.113	104.314	112.43	110.871	99.67	88.63	103.241	101.741	100.444
FBgn0025642	CG32812		protein_coding	-0.08922	0.4319	1.078	0.002621	0.259	0.334	0.305	0.323	0	0.046	0.125	0.086	0.105	0.201	0.111	0.063
FBgn0031148	Cbs	CBS,CBSL	protein_coding	0.01529	0.9505	-0.5951	0.001812	57.022	68.464	55.045	54.999	87.834	92.011	101.622	116.318	108.574	91.056	85.457	90.185
FBgn0038327	Trax	TSNAX	protein_coding	-0.01377	0.958	0.4221	5.588e-09	37.131	42.136	37.987	39.525	29.091	27.084	28.056	30.001	30.735	28.035	28.044	29.517
FBgn0030511	CG11158		protein_coding	0.03157	0.8188	0.6896	0.01475	5.54	6.958	6.704	6.463	4.204	3.83	4.113	4.735	3.365	3.511	3.042	3.88
FBgn0259676	DNApol-alpha60	PRIM2	protein_coding	-0.1116	0.2622	-0.9731	2.616e-14	24.843	25.729	19.667	21.394	41.343	35.659	33.919	41.465	46.912	47.544	49.332	40.349
FBgn0032422	atilla		protein_coding	0.01301	0.9515	0.2681	0.4578	16.55	24.51	33.204	23.429	21.531	22.814	14.427	20.575	17.584	14.421	17.777	16.808
FBgn0030749	AnxB11		protein_coding	0.006336	0.9983	1.254	4.26e-45	30.115	32.575	39.719	39.646	15.53	14.636	15.497	14.082	12.946	15.46	15.514	15.201
FBgn0265523	Smr		protein_coding	-0.03951	0.7749	-0.2348	0.08883	31.917	35.132	33.793	34.019	35.524	37.643	35.856	37.663	40.48	41.188	39.872	38.94
FBgn0029903	pod1	CORO7,CORO7-PAM16	protein_coding	-0.01923	0.9339	-0.0649	0.5309	28.309	27.299	35.726	28.208	31.113	31.502	29.9	28.968	28.79	32.628	32.366	31.456
FBgn0265718	CR44525		ncRNA	-0.001543	1	0.4923	0.3818	0	0.032	0.051	0	0	0	0.024	0	0	0	0.025	0
FBgn0010470	Fkbp14		protein_coding	0.05401	0.6316	1.104	1.874e-05	50.576	47.555	57.581	57.963	22.671	28.29	40.657	24.537	20.55	23	18.419	28.897
FBgn0035945	CG5026		protein_coding	-0.0827	0.2467	-0.7008	2.045e-33	38.099	34.064	37.342	35.982	56.443	55.978	52.341	53.289	60.18	61.174	60.529	55.824
FBgn0037680	pasi2		protein_coding	0.008919	0.9837	0.07057	0.5494	27.692	29.014	34.892	28.001	30.756	29.046	26.25	29.476	27.237	27.257	30.178	29.023
FBgn0051146	Nlg1		protein_coding	0.07806	0.4896	5.344	3.807e-49	4.087	5.286	9.923	6.364	0.185	0.28	0.243	0.209	0.076	0.223	0.096	0.205
FBgn0262475	bru2		protein_coding	0.04424	0.7107	2.228	1.725e-10	7.816	7.451	10.546	11.794	2.312	2.404	2.882	2.636	1.822	1.566	1.734	2.709
FBgn0004168	5-HT1A		protein_coding	0.08836	0.3911	3.95	0.0004147	0.046	0.023	0.043	0.055	0	0	0.017	0.019	0	0	0.006	0
FBgn0037469	Dpck	DCAKD	protein_coding	-0.0736	0.4915	0.2123	0.1757	25.392	30.71	30.874	31.145	23.167	20.02	20.113	21.78	25.235	25.392	24.05	25.983
FBgn0264326	DNApol-epsilon255	POLE	protein_coding	-0.07129	0.4686	-0.9375	1.137e-23	13.995	11.837	11.058	11.827	20.777	20.698	22.446	21.008	22.526	24.465	24.212	23.301
FBgn0036341	Syx13		protein_coding	-0.1219	0.1841	-0.5651	3.468e-08	32.544	31.45	29.336	30.45	41.996	39.018	34.874	41.265	47.035	49.619	47.051	41.954
FBgn0037901	CG6744	EXD2	protein_coding	0.02636	0.884	-0.0314	0.8434	31.263	33.048	31.421	32.989	34.21	30.685	36.271	38.553	33.931	32.777	33.312	31.726
FBgn0032744	Ttc19		protein_coding	-0.01364	0.9557	0.2536	0.2196	3.505	5.7	5.722	4.645	3.775	3.613	4.208	3.509	4.568	3.75	3.816	3.815
FBgn0053107	CG33107		protein_coding	-0.2176	0.05394	-0.6775	8.641e-08	14.764	14.731	13.674	12.925	20.479	16.513	15.618	18.089	23.778	22.544	23.63	21.824
FBgn0264975	Nrg		protein_coding	0.2387	0.07605	2.557	2.26e-49	46.876	59.799	89.607	61.84	14.619	16.901	16.466	13.201	9.534	10.919	12.01	11.176
FBgn0040087	p115	USO1	protein_coding	0.0925	0.2172	0.4185	2.798e-10	27.143	27.418	28.13	29.71	22.056	24.472	23.978	22.26	21.926	21.101	20.273	20.454
FBgn0053329	Sp212		protein_coding	-0.00184	1	1.244	0.06173	0	0.069	0.129	0.033	0.016	0	0.017	0.014	0	0	0.018	0.031
FBgn0028397	Tob		protein_coding	-0.02059	0.9143	-0.01471	0.9736	7.05	8.066	9.177	7.509	7.108	6.97	7.019	7.637	7.599	8.02	8.105	8.506
FBgn0030791	CG9132	NECAP1,NECAP2	protein_coding	0.1687	0.05365	0.4245	2.54e-06	36.634	33.092	41.474	39.53	32.31	33.571	35.793	32.191	26.475	29.526	26.403	28.973
FBgn0035519	CG1309		protein_coding	0.02193	0.9019	-0.07552	0.2335	34.903	36.841	37.191	34.893	37.808	37.479	40.103	39.915	37.804	38.48	38.869	36.515
FBgn0032369	CG6614		protein_coding	-0.01533	0.921	0.5371	0.3215	0	0.02	0	0.007	0	0	0	0	0.007	0	0	0
FBgn0036760	CG5567		protein_coding	-0.019	0.9357	-0.6609	4.289e-12	40.52	36.07	35.449	36.414	64.017	57.099	51.051	58.098	61.041	55.222	65.149	56.391
FBgn0039882	CG11576	SLC52A3,SLC52A1,SLC52A2	protein_coding	-0.03609	0.7913	-0.6827	9.161e-20	17.948	15.931	14.555	15.676	23.572	25.542	25.38	24.34	25.52	27.424	25.326	25.365
FBgn0033259	CG11210		protein_coding	0.04028	0.7608	0.4665	6.529e-08	32.265	27.762	35.304	35.949	24.851	24.52	26.06	24.681	22.319	22.652	23.909	25.378
FBgn0052183	Ccn		protein_coding	-0.0262	0.8183	0.4229	0.3292	0.028	0.014	0.033	0.01	0.01	0.009	0	0	0	0.02	0	0.018
FBgn0035207	Sherpa		protein_coding	0.05955	0.5649	-0.02104	0.8577	35.832	28.761	31	36.949	37.254	38.963	34.048	36.839	33.131	34.327	33.738	33.386
FBgn0032210	CYLD		protein_coding	0.07356	0.4778	0.7861	3.011e-11	13.088	15.949	17.91	16.547	9.384	10.236	11.628	10.069	8.47	8.252	9.02	10.313
FBgn0037834	Art1	PRMT8	protein_coding	-0.01572	0.9511	-0.3109	8.846e-05	123.262	116.424	114.213	113.029	146.594	141.266	142.653	138.903	142.097	146.927	150.185	142.836
FBgn0030054	Caf1-180		protein_coding	-0.0648	0.546	-1.254	9.416e-23	47.417	35.871	33.872	36.525	90.172	86.04	76.115	74.749	86.588	97.021	97.83	91.329
FBgn0264556	Gr39a		protein_coding	0.007815	0.9732	2.943	0.0006768	0.02	0.081	0.065	0.051	0	0.007	0.008	0.012	0.007	0	0.016	0
FBgn0004400	rhi		protein_coding	-0.02212	0.9063	-0.8767	0.0001132	15.562	14.598	13.594	12.78	24.063	27.568	26.313	23.846	26.571	29.235	29.887	27.08
FBgn0052412	QC	QPCTL,QPCT	protein_coding	-0.4669	0.001718	-0.7874	5.287e-09	58.91	81.57	65.345	63.584	86.248	73.024	65.467	99.007	136.861	126.011	117.552	97.768
FBgn0030053	CG12081		protein_coding	-0.06524	0.4954	-0.1282	0.1393	26.943	30.692	28.168	28.384	30.127	30.407	25.158	28.925	31.68	32.438	32.378	28.589
FBgn0002638	Rcc1		protein_coding	-0.08797	0.3083	-0.9923	1.315e-33	134.331	131.108	106.51	108.845	222.255	219.238	201.124	218.699	244.419	248.333	242.773	230.142
FBgn0010246	Myo61F		protein_coding	0.04231	0.7283	2.673	1.517e-18	51.131	59.35	67.419	68.343	10.496	11.998	14.393	10.655	10.116	8.73	8.108	11.016
FBgn0265998	Doa		protein_coding	-0.007114	0.993	0.1554	0.1599	13.457	13.144	15.181	14.67	13.165	12.956	11.469	12.223	11.989	12.366	12.795	13.317
FBgn0033266	Socs44A		protein_coding	-0.0779	0.4347	-0.3767	0.0006923	23.98	21.904	24.612	23.808	28.233	25.408	28.057	27.091	29.296	32.934	30.966	30.711
FBgn0037092	M6		protein_coding	-0.1294	0.2066	0.9036	3.156e-12	8.926	8.327	12.412	12.153	4.388	4.309	4.326	4.633	5.209	5.072	5.789	5.758
FBgn0029590	CG14811		protein_coding	-0.05284	0.5707	4.195	4.874e-05	0.45	0.638	0.766	0.781	0	0	0	0	0	0.032	0.071	0
FBgn0032402	CG14945		protein_coding	1.777	5.066e-05	1.79	9.69e-06	0.707	1.355	1.62	1.445	2.078	0.233	1.078	2.238	0.389	0.439	0.194	0.351
FBgn0250816	AGO3	PIWIL2	protein_coding	-0.07691	0.4784	-1.339	7.774e-13	26.423	23.665	21.553	22.34	57.647	49.092	42.079	49.477	57.389	61.512	66.577	59.755
FBgn0003969	vap	RASA1	protein_coding	0.1668	0.04293	0.3504	3.033e-05	31.046	28.735	33.77	33.411	27.601	29.268	31.127	29.854	23.428	23.24	24.972	27.344
FBgn0031227	CG3709	PUS10	protein_coding	-0.8731	2.114e-09	-0.9751	5.256e-13	12.512	11.28	9.335	11.452	13.895	9.631	11.969	12.196	22.995	20.771	22.997	23.196
FBgn0037374	jagn	JAGN1	protein_coding	-0.06276	0.4784	-0.211	0.001635	52.61	49.75	53.33	53.046	56.857	53.394	55.316	59.851	61.613	59.159	60.903	60.58
FBgn0267487	Ptp61F		protein_coding	-0.03536	0.7909	-0.5217	5.826e-15	32.224	28.145	28.893	28.043	44.488	42.839	35.758	39.111	41.148	43.827	45.459	38.902
FBgn0038395	CG10407		protein_coding	0.1933	0.1841	-0.1083	0.7215	58.898	43.843	46.698	83.945	39.903	98.415	189.767	121.442	67.683	67.538	38.65	85.488
FBgn0019968	Khc-73		protein_coding	0.03691	0.7969	0.6654	1.616e-07	15.945	15.318	19.402	17.543	9.179	11.15	14.667	10.602	9.514	9.733	10.427	12.329
FBgn0262593	Shab		protein_coding	0.2964	0.1068	4.958	1.702e-39	0.572	1.06	1.497	0.898	0.043	0.119	0.044	0.051	0.018	0.029	0.024	0.052
FBgn0265178	CG44243	LIPT1	protein_coding	0.1368	0.1529	1.12	1.83e-24	116.526	118.024	151.43	141.518	67.244	78.485	77.743	65.218	53.509	62.414	59.043	64.096
FBgn0053217	CG33217		protein_coding	-0.004555	1	-0.2475	0.08564	23.332	21.765	22.324	21.333	25.331	27.087	26.713	26.367	22.76	27.811	27.836	28.314
FBgn0259713	CG42367		protein_coding	0.01159	0.9494	0.2839	0.5829	0	0	0.063	0	0	0.051	0	0	0	0	0	0
FBgn0003942	RpS27A		protein_coding	0.1083	0.2457	0.2705	0.01375	2742.63	2697.77	2635.25	2802.81	2506.86	2618.99	2853.33	2514.6	2101.89	2202.69	2115.54	2524.67
FBgn0036754	CG5589	DDX52	protein_coding	0.001008	1	-0.2155	0.07725	28.042	21.062	20.152	22.652	25.033	26.586	30.513	25.631	25.132	25.71	25.906	30.755
FBgn0025186	ari-2	ARIH2	protein_coding	-0.04479	0.719	-0.7371	1.4e-13	22.969	19.885	22.408	20.048	37.508	35.579	29.53	31.17	34.212	37.925	38.898	33.313
FBgn0050085	Rif1		protein_coding	-0.09206	0.3463	-1.074	1.337e-19	35.038	31.006	28.063	30.681	63.317	63.625	44.703	56.965	64.26	68.61	73.55	61.266
FBgn0266709	Zmynd10	ZMYND10	protein_coding	-0.00112	1	2.042	0.0003144	0.511	0.621	0.724	0.702	0.199	0.118	0.175	0.047	0.209	0.036	0.141	0.154
FBgn0050287	CG30287		protein_coding	0.01001	0.9558	4.803	5.434e-05	0.12	0.365	0.389	0.232	0	0	0	0.024	0	0	0	0
FBgn0036787	CG4306	GGCT	protein_coding	0.04995	0.6459	3.686	1.572e-09	3.753	3.875	3.372	3.411	0.683	0.586	0.368	0.136	0.249	0.398	0.117	0.25
FBgn0033273	Gasz		protein_coding	0.0194	0.931	-0.5085	4.598e-11	32.604	29.99	32.047	29.448	45.879	43.972	48.601	44.161	41.773	45.968	48.03	42.036
FBgn0036187	RIOK1	RIOK1	protein_coding	-0.007205	0.9926	-0.6241	3.983e-05	26.085	20.937	21.468	22.947	35.432	37.21	37.32	32.767	34.262	36.479	38.025	36.931
FBgn0036155	CG6163		protein_coding	0.04937	0.6825	0.8267	1.367e-09	9.313	11.998	11.302	11.589	8.086	6.532	6.36	6.189	5.667	5.994	6.697	5.872
FBgn0000568	Eip75B		protein_coding	0.206	0.1439	2.805	2.59e-30	20.941	20.223	26.091	33.292	4.274	5.684	5.794	5.958	3.26	3.364	2.703	4.898
FBgn0038585	Non3	RPF2	protein_coding	0.09968	0.3143	0.2791	0.03104	68.564	70.948	61.442	66.149	59.183	68.551	69.754	61.327	56.143	51.999	50.113	59.217
FBgn0259740	CG42394		protein_coding	0.2105	0.1545	3.734	4.09e-42	13.147	15.877	23.452	18.919	2.303	2.26	2.206	1.873	1.078	1.592	0.953	1.62
FBgn0085192	CG34163		protein_coding	-0.006387	0.9979	-0.2489	0.01881	36.635	35.313	31.883	30.471	39.772	37.439	41.384	39.99	41.105	37.029	38.407	43.775
FBgn0086130	Dbp21E2	DDX28	protein_coding	-0.07073	0.4686	-0.7577	1.581e-16	13.952	15.938	13.968	13.388	20.672	22.319	22.96	22.369	25.68	25.005	24.459	22.798
FBgn0262026	CG42837		protein_coding	0.1358	0.1551	1.115	3.078e-24	125.577	126.501	162.307	152.04	72.499	84.544	83.831	69.892	57.525	67.227	63.677	69.07
FBgn0032089	Rcd-1r	CNOT9	protein_coding	0.06584	0.5365	7.486	4.641e-37	25.221	28.546	31.421	36.928	0.137	0.552	0.246	0.157	0.12	0.23	0.128	0.087
FBgn0027598	cindr		protein_coding	-0.001845	1	0.2187	0.1973	35.889	37.885	50.198	41.125	34.427	34.025	36.807	33.586	33.392	36.638	35.085	34.518
FBgn0011576	Cyp4d2		protein_coding	0.04924	0.6741	3.162	1.172e-34	1.302	2.056	2.273	2.308	0.175	0.306	0.331	0.302	0.277	0.166	0.171	0.26
FBgn0034284	CG14491		protein_coding	0	1	1.372	0.07822	0.076	0.232	0	0	0	0	0	0	0	0	0	0
FBgn0002521	pho	YY1	protein_coding	-0.0298	0.8569	-0.8782	2.558e-12	38.251	34.488	40.083	31.817	70.441	65.998	53.47	64.988	63.66	69.24	76.141	63.295
FBgn0024558	Dph5	DPH5	protein_coding	-0.05161	0.6617	-0.1716	0.2113	140.872	184.756	121.35	140.909	140.752	138.507	143.238	175.342	215.282	159.305	142.998	149.628
FBgn0264089	sli		protein_coding	0.1304	0.2685	3.876	8.453e-62	10.181	9.48	12.19	11.552	0.917	1.184	1.112	0.908	0.648	0.757	0.609	0.897
FBgn0265309	CR44282		ncRNA	0.02208	0.86	0.6812	0.2191	0.128	0.032	0.052	0.023	0.023	0.021	0.073	0.02	0.024	0	0	0.043
FBgn0037856	Leash		protein_coding	0.006174	0.9973	0.6082	0.0003764	20.236	16.667	20.456	23.171	11.608	13.089	12.982	14.021	11.704	12.864	12.116	13.959
FBgn0045759	bin		protein_coding	0.05633	0.6086	4.207	2.125e-23	0.634	0.899	1.259	0.997	0.034	0.156	0.024	0.087	0.035	0.023	0.063	0.075
FBgn0052264	CG32264		protein_coding	-0.009808	0.979	0.07458	0.5787	10.841	11.053	14.553	12.28	11.229	11.43	11.673	10.886	10.679	11.836	11.746	11.891
FBgn0262534	CG43088		protein_coding	0.03636	0.7329	7.702	2.063e-21	5.324	6.469	8.888	8.186	0	0.106	0.025	0.059	0.024	0.046	0.025	0
FBgn0037921	CG6808		protein_coding	-0.04658	0.704	-0.3379	0.05469	1.889	2.184	1.727	1.709	2.275	2.042	2.145	2.018	2.613	2.407	2.617	2.103
FBgn0000320	eya	EYA4,EYA3,EYA1,EYA2	protein_coding	0.132	0.2879	3.394	1.03e-26	23.241	26.251	34.183	39.382	3.723	4.339	5.495	4.448	2.647	2.409	2.144	4.23
FBgn0052512	CG32512		protein_coding	-0.02396	0.8891	0.0431	0.8783	40.736	35.503	39.069	45.618	34.658	37.827	31.097	34.631	37.062	40.979	36.458	40.564
FBgn0030089	AP-1gamma	AP1G1,AP1G2	protein_coding	-0.03829	0.7325	-0.2713	2.54e-06	36.551	36.145	36.881	35.979	43.361	41.6	40.872	43.113	43.265	46.859	43.818	42.133
FBgn0029770	CG4151		protein_coding	0	1	0.2611	0.6408	0	0.03	0	0	0	0	0	0	0	0	0	0
FBgn0050413	CG30413		protein_coding	0	1	0.2644	0.6321	0.073	0	0	0	0	0	0	0	0	0	0	0
FBgn0036463	Reck	RECK	protein_coding	-0.1114	0.3475	-0.1696	0.6194	1.03	0.88	0.929	0.673	0.786	0.571	0.328	0.562	1.214	1.01	0.99	1.107
FBgn0030766	mthl1		protein_coding	0.03953	0.7739	0.6531	6.305e-06	11.261	11.448	14.01	13.354	7.124	8.105	10.225	8.703	7.333	7.533	7.556	8.46
FBgn0085484	Pdxk	PDXK	protein_coding	-0.06951	0.5246	-0.3334	0.06152	20.632	23.107	26.963	23.553	27.57	26.763	21.951	24.542	30.624	31.029	29.587	30.938
FBgn0037756	CG8507	LRPAP1	protein_coding	0.03256	0.8151	-0.4541	1.037e-11	139.844	117.265	125.918	124.829	182.168	179.283	197.154	168.833	162.293	174.215	175.28	187.36
FBgn0083123	Uhg5		ncRNA	0.06489	0.5525	0.5884	0.0004486	43.724	46.621	43.512	40.362	24.968	34.809	40.779	32.215	24.317	25.483	25.225	36.255
FBgn0002780	mod		protein_coding	0.01963	0.9277	-0.1164	0.5086	407.842	341.852	355.999	357.986	426.809	442.244	453.189	373.153	376.604	397.838	383.016	442.451
FBgn0012036	Aldh	AC002996.1,ALDH2	protein_coding	-0.02763	0.8737	0.0275	0.868	194.554	272.26	254.017	206.803	223.659	193.535	193.447	242.668	265.357	214.634	220.103	208.852
FBgn0034988	cN-IIIB	NT5C3A,NT5C3B	protein_coding	0.15	0.1008	0.2498	0.01596	18.742	18.725	19.618	18.75	19.496	19.976	18.508	18.17	15.578	15.757	15.453	16.562
FBgn0000543	ecd	ECD	protein_coding	-0.01346	0.9605	0.01618	0.899	30.324	36.853	32.044	32.503	31.57	31.68	30.68	33.361	37.506	32.135	30.483	30.065
FBgn0037330	mRpL44	MRPL44	protein_coding	0.06798	0.5081	0.3777	0.0003429	50.196	51.275	44.448	48.625	37.431	42.07	44.712	41.564	37.764	35.707	35.147	39.472
FBgn0050419	CG30419		protein_coding	0	1	1.663	0.05362	0	0.041	0.008	0	0	0	0	0	0	0	0	0
FBgn0026533	Dek		protein_coding	-0.04063	0.7614	-0.5675	1.402e-09	83.307	69.936	76.429	73.977	115.909	116.737	97.467	96.265	107.116	119.014	115.526	113.597
FBgn0011638	La	SSB	protein_coding	-0.03676	0.7965	-0.447	5.4e-06	143.189	137.115	119.224	128.768	172.453	162.879	182.397	166.36	181.919	184.831	178.734	182.336
FBgn0260971	CG42594		protein_coding	-0.01452	0.9352	1.044	0.06772	0	0.06	0.06	0.038	0	0.01	0.006	0.014	0.006	0.005	0.012	0.02
FBgn0035488	CG11593		protein_coding	-0.1028	0.1547	-0.4849	2.469e-13	28.252	25.228	25.826	26.88	36.971	32.105	31.402	33.257	36.721	38.848	38.416	35.405
FBgn0032163	TbCMF46		protein_coding	-0.002053	1	0.4842	0.3363	0	0	0.018	0.094	0.015	0.029	0	0	0.032	0.015	0	0
FBgn0034837	RpL22-like		protein_coding	0.04149	0.7003	9.915	3.927e-48	43.573	53.108	55.591	62.006	0.088	0.061	0.118	0.038	0.023	0.089	0.025	0.021
FBgn0036348	CG17687		protein_coding	0.01077	0.9515	1.72	0.0436	0.008	0.008	0	0.017	0	0	0	0.005	0	0	0	0
FBgn0038755	Hs6st	HS6ST3,HS6ST2,HS6ST1	protein_coding	-0.005446	1	-0.3483	0.005795	9.09	8.43	10.172	8.88	12.85	12.429	10.516	10.868	10.545	11.982	12.692	12.017
FBgn0285937	Rab1	RAB1A	protein_coding	0.02984	0.8373	0.413	5.963e-10	136.661	137.585	153.729	154.199	113.313	108.772	115.273	114.103	114.864	105.294	107.524	107.677
FBgn0035959	CG4911		protein_coding	-0.03672	0.798	-0.6495	2.556e-07	40.813	36.445	40.83	36.453	59.743	58.217	55.49	55.391	57.13	64.591	67.061	59.295
FBgn0031971	Sirup	SDHAF4	protein_coding	0.004697	1	0.2166	0.473	82.465	102.992	136.26	77.363	70.044	84.773	89.604	86.918	73.989	75.252	79.745	90.406
FBgn0267746	CR46077		ncRNA	4.025	0.001718	0.2723	0.6115	0	0.121	0	0	0.593	0.315	0.822	0.511	0	0	0	0
FBgn0034073	CG8414		protein_coding	-0.02157	0.921	-0.6379	1.018e-07	30.742	24.9	27.525	27.567	44.608	39.816	44.355	39.201	40.564	44.09	44.112	47.128
FBgn0031220	CG4822		protein_coding	1.1	0.009247	4.611	1.228e-17	9.532	11.127	17.417	14.166	1.005	1.488	3.69	1.433	0.539	0.362	0.443	0.602
FBgn0266521	stai		protein_coding	-0.01517	0.9511	-0.4038	0.03123	78.425	74.214	81.238	72.163	106.296	93.837	94.66	103.065	99.536	106.234	109.815	105.004
FBgn0002632	E(spl)m6-BFM		protein_coding	-0.002143	1	0.2962	0.546	0	0.034	0.054	0.049	0	0.022	0	0.041	0.025	0	0	0.045
FBgn0267072	CR45516		ncRNA	-0.001485	1	2.173	0.02118	1.19	0.516	0.413	0.369	0	0.223	0	0	0	0	0.134	0.114
FBgn0038811	PUS1	PUS1	protein_coding	-0.02555	0.8902	-0.0377	0.7563	18.778	19.886	16.566	17.476	17.949	18.619	17.706	17.136	18.841	18.138	18.784	18.861
FBgn0037857	Tengl4		protein_coding	0	1	0	1	0	0	0	0	0	0	0	0	0	0	0	0
FBgn0265351	nac	SLC35C1	protein_coding	-0.02536	0.8903	-0.04166	0.8004	7.772	10.335	9.432	8.731	8.521	8.33	8.871	9.484	10.391	9.751	8.134	9.117
FBgn0039064	CG4467		protein_coding	0.02679	0.8382	2.389	0.0002055	0.057	0.052	0.063	0.052	0.015	0.007	0.012	0.022	0.008	0.015	0.004	0.01
FBgn0263077	CG43340		protein_coding	-0.01238	0.963	-0.331	0.01721	7.595	6.332	6.227	6.701	8.606	8.208	8.374	8.107	8.256	8.786	9.099	8.193
FBgn0036629	GluRS-m	EARS2	protein_coding	0.002571	1	-0.2918	0.02702	6.905	6.081	5.63	5.95	8.081	7.925	7.112	7.478	8.141	7.7	7.318	7.264
FBgn0037249	eIF3a	EIF3A	protein_coding	0.2437	0.0003094	-0.07368	0.2924	203.62	201.017	202.529	210.813	251.161	277.629	275.62	242.888	198.764	219.74	223.313	219.719
FBgn0027934	alpha-Est4aPsi		pseudogene	0.07028	0.4725	0.5166	0.3537	0.057	0	0.023	0	0.02	0.037	0.043	0.017	0.021	0	0	0
FBgn0004034	y		protein_coding	0.07297	0.508	2.695	1.348e-06	6.435	5.832	5.608	9.235	1.314	1.838	1.615	2.399	0.95	0.91	0.578	1.474
FBgn0085397	Fili		protein_coding	-0.04331	0.7152	2.699	1.248e-10	1.734	2.117	2.644	2.359	0.18	0.302	0.255	0.213	0.222	0.312	0.184	0.597
FBgn0032370	CG12307		protein_coding	0	1	0	1	0	0	0	0	0	0	0	0	0	0	0	0
FBgn0053509	CG33509		protein_coding	4.676	0.0003254	4.935	3.911e-06	0.381	0.441	0.397	0.688	0.231	0.394	0.581	0.348	0	0	0	0.037
FBgn0267986	CR46253		ncRNA	0.1713	0.2057	4.758	5.175e-08	1.511	1.415	1.194	1.748	0.053	0.174	0.115	0.391	0.084	0	0.03	0.051
FBgn0029930	CG12541		protein_coding	0.05189	0.6448	7.04	1.464e-67	11.551	16.793	22.022	19.409	0.16	0.219	0.196	0.147	0.124	0.065	0.072	0.223
FBgn0050334	CG30334		protein_coding	-0.0007304	1	-0.2291	0.5012	2.697	4.126	3.01	3.336	1.823	4.846	4.795	5.912	6.873	2.736	2.556	5.352
FBgn0260933	rempA	IFT140	protein_coding	1.054	7.444e-12	2.421	2.032e-64	2.497	2.166	2.517	2.528	0.932	1.028	1.105	0.835	0.523	0.421	0.387	0.476
FBgn0266758	Esyt2		protein_coding	0.05909	0.595	4.537	7.767e-40	17.832	26.362	39.457	27.937	1.271	1.683	1.951	1.532	1.071	1.08	0.697	1.777
FBgn0000053	ade3	GART	protein_coding	0.1267	0.2373	0.2894	0.06942	38.299	39.614	35.376	35.894	30.76	36.229	48.966	36.424	28.589	28.071	24.895	38.205
FBgn0037635	CG9837		protein_coding	0.04136	0.7332	1.423	5.438e-05	0.463	0.615	0.75	0.795	0.154	0.333	0.32	0.361	0.151	0.175	0.263	0.292
FBgn0004607	zfh2		protein_coding	0.02115	0.8967	4.483	1.682e-15	0.375	0.474	0.558	0.438	0.024	0.022	0.033	0.019	0.021	0.018	0.005	0.031
FBgn0010453	Wnt4		protein_coding	0.05133	0.6488	5.173	5.991e-32	4.86	5.393	8.068	7.486	0.209	0.254	0.234	0.297	0.152	0.154	0.099	0.259
FBgn0031851	Aatf		protein_coding	0.02109	0.9212	-0.3443	0.009838	39.919	27.849	32.104	31.679	45.812	45.517	47.592	39.319	39.862	43.254	44.415	42.091
FBgn0033571	Rpb5	POLR2E	protein_coding	0.3815	0.001134	0.6877	1.732e-10	60.916	68.146	50.434	61.018	51.854	50.757	50.347	48.464	36.935	34.289	34.563	40.904
FBgn0267821	da		protein_coding	-0.0314	0.8251	-0.5876	2.692e-18	48.146	45.044	47.259	45.043	71.101	65.114	63.918	69.699	67.185	71.401	75.961	65.927
FBgn0283649	elgi	RNF41	protein_coding	-0.01486	0.9515	-0.4567	8.491e-08	33.203	37.249	33.975	32.836	46.666	46.29	41.774	50.887	47.371	48.602	49.463	44.447
FBgn0039767	CG2218		protein_coding	0.05916	0.5184	-0.393	2.327e-09	47.608	46.125	44.277	44.271	66.575	66.767	59.879	64.131	59.281	60.788	62.372	57.896
FBgn0035762	Rint1	RINT1	protein_coding	0.06198	0.5591	0.6141	1.256e-08	30.377	29.206	33.395	31.401	19.644	20.872	25.701	22.933	18.995	20.118	18.743	22.092
FBgn0026313	X11L		protein_coding	-0.02098	0.9178	-0.4354	2.017e-11	22.089	19.571	20.891	19.345	27.695	27.143	27.371	26.279	26.563	28.731	28.601	27.339
FBgn0267773	CR46104		ncRNA	0.01036	0.9645	1.58	0.001059	0.703	1.424	1.658	1.895	0.271	0.336	0.438	0.74	0.333	0.319	0.555	0.386
FBgn0261429	CR42646		ncRNA	0.04801	0.6256	4.97	1.029e-08	0.375	0.394	0.607	0.802	0.082	0.009	0.011	0.026	0.011	0	0.023	0.019
FBgn0035213	CG2199		protein_coding	0.03385	0.8204	-0.4507	1.04e-05	42.659	33.321	31.901	36.972	53.832	55.037	52.901	50.788	49.263	46.49	49.898	54.613
FBgn0027620	Acf		protein_coding	-0.299	0.009352	-1.516	1.734e-40	25.219	20.528	21.157	19.742	51.519	47.928	43.554	45.126	58.734	64.961	67.245	58.617
FBgn0030788	Sap30	SAP30L,SAP30	protein_coding	-0.03316	0.8257	-0.3151	0.00284	36.912	32.075	33.104	31.63	42.802	40.525	38.25	36.594	40.171	43.261	42.976	41.395
FBgn0024920	Ts		protein_coding	-0.08484	0.4058	-0.9296	8.121e-13	31.872	32.56	26.488	33.243	50.57	54.9	47.033	53.778	63.72	65.526	60.166	53.16
FBgn0030855	CG5800	DDX10	protein_coding	0.009395	0.981	-0.416	2.418e-06	29.972	31.505	26.435	28.431	40.712	40.982	39.633	37.4	39.749	40.295	38.979	37.4
FBgn0000723	FER		protein_coding	0.05697	0.6094	2.573	7.603e-15	4.69	5.187	7.611	7.551	0.78	1.265	1.818	1.73	0.961	1.021	0.689	1.452
FBgn0039435	TwdlP		protein_coding	0	1	0	1	0	0	0	0	0	0	0	0	0	0	0	0
FBgn0037195	CG11226		protein_coding	-0.002662	1	3.95	1.288e-05	0.243	0.456	0.927	0.827	0	0.068	0	0.042	0	0.074	0	0.047
FBgn0030018	slpr		protein_coding	-0.02629	0.8843	-0.5071	2.142e-07	30.724	27.38	29.873	26.934	39.864	39.651	40.309	38.131	39.156	43.509	41.993	40.562
FBgn0034240	MESR4		protein_coding	0.002729	1	-0.3813	0.001559	22.539	18.425	19.733	19.004	26.111	27.01	27.453	25.314	25.963	23.776	26.958	28.571
FBgn0031453	Bacc		protein_coding	-0.02393	0.8948	0.5272	0.006805	124.41	190.699	192.511	143.141	94.978	94.555	104.474	97.217	105.531	112.691	105.083	105.492
FBgn0033816	CG4679	PTCD3	protein_coding	0.1174	0.2215	0.08126	0.5314	39.333	30.915	33.644	35.139	38.804	39.407	43.477	34.649	31.337	31.365	33.58	34.747
FBgn0017577	Mcm5	MCM5	protein_coding	-0.1003	0.3325	-1.221	1.216e-15	69.78	67.815	55.837	60.336	131.586	119.501	112.731	129.526	153.421	156.281	161.147	135.95
FBgn0031816	Rchy1	RCHY1	protein_coding	0.03557	0.7957	1.924	1.482e-15	9.576	10.59	13.122	14.874	3.374	3.739	3.79	3.691	2.908	2.919	3.808	2.884
FBgn0034001	mRpL41	MRPL41	protein_coding	0.03419	0.8188	0.2217	0.06966	31.991	33.371	29.203	31.918	28.363	28.35	30.801	27.712	28.092	25.482	25.315	28.613
FBgn0033246	ACC	ACACB	protein_coding	0.5022	0.002576	0.7452	7.146e-07	29.906	26.798	31.734	29.973	19.67	26.407	33.67	24.759	15.772	15.614	15.309	21.526
FBgn0030530	jub		protein_coding	-0.09397	0.2591	-0.4956	7.529e-10	25.702	25.96	24.587	25.437	32.869	30.635	31.473	33.513	37.596	37.799	36.115	32.971
FBgn0037504	CG1142		protein_coding	0.08497	0.3769	0.2286	0.03726	45.202	44.282	42.911	40.016	39.778	41.054	47.617	38.617	35.321	37.57	35.167	37.989
FBgn0263132	Cht6		protein_coding	0.2026	0.1481	2.645	3.285e-28	0.821	0.695	0.692	1.19	0.162	0.239	0.273	0.148	0.132	0.13	0.08	0.195
FBgn0027779	VhaSFD	ATP6V1H	protein_coding	0.005784	1	0.4129	6.727e-05	87.876	99.683	111.366	102.775	75.231	74.693	77.637	74.062	69.935	76.331	76.614	75.552
FBgn0266350	CR44999		ncRNA	-0.004966	1	0.1104	0.5967	70.125	71.332	74.969	72.896	64.142	62.78	67.229	65.973	64.685	63.783	65.296	71.215
FBgn0259989	CG42486		protein_coding	0.01234	0.9515	4.266	1.766e-10	12.044	23.889	32.546	19.856	0.671	1.057	1.917	1.18	0.737	1.265	0.814	1.191
FBgn0001301	kel		protein_coding	-0.05224	0.6513	-0.4887	0.01314	15.291	14.854	15.369	14.581	18.045	19.783	18.881	17.283	20.722	22.999	22.999	21.947
FBgn0031217	CG11377		protein_coding	-0.01744	0.9433	-0.5532	1.274e-06	39.491	32.723	32.757	35.459	51.933	48.888	51.347	50.139	50.133	54.527	51.902	53.018
FBgn0036974	eRF1	ETF1	protein_coding	0.02169	0.9099	0.04003	0.5937	128.526	121.694	120.37	120.143	117.409	120.657	128.74	122.6	121.835	118.124	116.327	120.771
FBgn0039301	Nup37	NUP37	protein_coding	-0.02516	0.8921	-0.3617	0.009305	31.41	40.545	28.224	31.399	40.928	37.036	34.523	49.222	52.936	40.653	41.466	36.994
FBgn0039120	Nup98-96		protein_coding	-0.02481	0.8966	-0.6619	1.424e-09	49.438	42.103	44.668	43.088	68.919	69.845	70.505	65.848	68.788	73.69	75.713	70.459
FBgn0032889	CG9331		protein_coding	-1.663	1.316e-09	-0.9492	8.41e-05	3.59	7.256	7.034	4.932	2.924	3.413	4.349	3.327	13.689	12.519	9.376	12.65
FBgn0015795	Rab7	RAB7A	protein_coding	0.0604	0.576	1.226	1.58e-27	179.231	173.171	221.605	211.299	85.233	93.234	108.444	82.872	74.538	83.293	85.274	87.895
FBgn0039156	CG6178		protein_coding	-0.005745	1	-0.4397	0.009677	54.477	46.562	45.538	44.898	65.816	65.465	66.972	65.14	66.112	69.226	67.758	65.284
FBgn0034029	eIF2Bgamma	EIF2B3	protein_coding	0.01319	0.9605	0.1825	0.03323	33.369	39.215	33.697	36.065	30.31	30.687	34.403	32.036	32.835	30.725	31.365	30.086
FBgn0038819	Cpr92F		protein_coding	0	1	0.8582	0.2015	0.041	0	0.017	0	0	0	0	0	0	0	0	0
FBgn0030065	CG12075		protein_coding	0.03244	0.8041	0.2484	0.4603	4.012	6.315	8.662	4.969	4.339	5.976	7.003	6.804	5.258	3.755	3.777	4.877
FBgn0031298	Atg4a	ATG4A,ATG4B	protein_coding	-0.04981	0.6555	-0.265	0.002086	10.838	12.75	14.63	12.714	13.773	15.483	13.452	14.622	15.215	15.662	15.468	15.21
FBgn0037556	CG9636	CUEDC2	protein_coding	-0.04392	0.7288	-0.6274	1.364e-08	22.914	19.956	22.635	18.635	34.776	30.751	26.153	30.081	31.146	33.066	36.878	31.137
FBgn0262579	Ect4		protein_coding	0.002914	1	1.398	2.236e-20	32.096	37.939	52.084	43.704	13.624	14.968	17.966	15.777	14.165	15.555	14.682	17.425
FBgn0086442	mib2	MIB2	protein_coding	-0.01641	0.9494	-0.575	3.722e-10	29.382	28.065	27.965	26.668	43.193	42.882	38.15	40.155	41.407	43.816	43.908	39.706
FBgn0035001	Slik		protein_coding	0.1498	0.1174	0.416	0.0001318	40.813	34.185	40.321	38.881	30.23	35.747	40.935	31.815	25.597	27.703	27.854	33.005
FBgn0265534	CR44384		ncRNA	-0.02067	0.8757	-0.02629	0.9678	0.154	0	0	0.111	0.109	0.051	0	0	0.057	0	0.182	0.052
FBgn0028479	Mtpalpha	HADHA	protein_coding	0.02256	0.9143	0.3154	0.02271	174.004	174.38	181.401	181.877	145.428	148.473	153.398	147.658	135.046	144.705	139.582	143.813
FBgn0259481	Mob2		protein_coding	-0.01378	0.9605	0.4195	0.0001284	16.521	16.456	19.927	18.35	12.602	12.565	13.026	13.045	12.531	14.212	13.207	12.676
FBgn0002023	Lim3		protein_coding	4.429	0.0002635	4.918	8.735e-07	0.902	0.452	0.398	0.801	0.006	0.752	0.987	0.005	0.013	0.019	0	0.024
FBgn0037987	CG14739	UBE2H	protein_coding	0	1	1.485	0.06918	0	0	0.034	0.123	0	0	0	0	0	0	0	0
FBgn0278598	CR46268		ncRNA	-0.5389	3.666e-06	-1.08	3.251e-24	7.355	6.583	8.302	7.427	11.878	10.787	9.907	10.081	15.017	16.014	16.823	15.883
FBgn0266451	fau		protein_coding	0.0532	0.6374	5.12	2.677e-59	116.916	197.372	288.926	232.483	6.92	7.762	8.597	7.487	6.03	5.321	3.73	8.105
FBgn0010909	msn		protein_coding	0.01617	0.9499	0.1307	0.3575	49.734	48.257	57.491	53.29	47.338	52.344	50.549	46.613	44.128	49.579	49.197	46.644
FBgn0035211	CG2211		protein_coding	-0.05375	0.6316	-0.3442	0.001988	14.163	13.703	13.724	12.658	15.994	14.892	16.525	15.786	16.93	18.926	17.672	16.058
FBgn0030330	Tango10		protein_coding	-0.0515	0.6123	-0.5983	1.06e-17	31.876	27.984	28.152	28.6	41.468	40.879	43.049	41.374	42.209	47.33	45.641	42.516
FBgn0039687	Naa40	NAA40	protein_coding	0.01399	0.958	-0.0708	0.6689	40.261	28.879	28.198	38.715	36.523	39.785	37.208	35.304	35.169	35.647	32.78	39.871
FBgn0033587	CG13218		protein_coding	0.06235	0.5738	1.017	0.002592	1.17	1.999	1.895	2.378	0.879	1.057	1.225	1.425	0.98	0.469	0.346	1.276
FBgn0266596	CR45121		ncRNA	-0.01043	0.9605	0.3266	0.4409	0.138	0.209	0.167	0.05	0.049	0	0	0.168	0.103	0.098	0	0.093
FBgn0265595	CG44422		protein_coding	0.01307	0.9511	3.761	9.088e-09	0.155	0.24	0.292	0.254	0.013	0.027	0.01	0.025	0.007	0.023	0.007	0.025
FBgn0027569	cert	COL4A3BP	protein_coding	-0.01585	0.949	0.7329	2.129e-05	40.489	58.193	59.602	52.112	28.106	27.726	28.551	30.243	29.85	31.25	30.028	29.72
FBgn0037562	CG11671		protein_coding	-0.2688	0.1244	3.387	4.36e-21	3.706	8.186	7.187	5.235	0.119	0.332	0.513	0.068	0.293	0.481	0.399	1.056
FBgn0261561	CG42675		protein_coding	0.0004039	1	2.459	2.334e-05	0.641	0.818	1.163	0.614	0.089	0.165	0.117	0.17	0.187	0.109	0.044	0.196
FBgn0035584	CG17030		protein_coding	0	1	0	1	0	0	0	0	0	0	0	0	0	0	0	0
FBgn0031814	retm		protein_coding	-0.06199	0.5696	0.02445	0.8859	15.955	18.95	21.072	18.54	18.287	15.937	14	16.122	18.193	18.641	19.121	17.243
FBgn0032727	CG10623		protein_coding	0.04469	0.7171	0.9615	2.768e-06	81.988	84.523	101.044	110.679	40.227	53.11	63.029	58.632	51.074	37.612	39.612	53.938
FBgn0003870	ttk		protein_coding	0.02656	0.8825	-0.1235	0.3819	26.345	20.272	27.479	27.023	24.441	27.243	36.735	29.266	25.05	28.366	26.663	30.712
FBgn0027610	Dic1	AC139530.2,SLC25A10	protein_coding	0.07373	0.5009	0.7285	0.0001984	27.633	26.847	30.745	28.359	18.839	20.145	22.404	19.664	14.579	16.372	14.945	18.596
FBgn0024245	dnt		protein_coding	0.003602	1	0.3256	0.01854	14.807	16.739	21.832	17.552	14.449	14.658	12.971	14.151	13.067	14.365	14.44	13.863
FBgn0025336	CG4882		protein_coding	0.08834	0.3703	0.2046	0.09807	48.322	49.525	46.75	51.366	48.315	48.692	51.942	47.381	44.604	40.573	39.257	44.321
FBgn0029176	eEF1gamma	EEF1G	protein_coding	0.1307	0.1069	0.2203	0.01	1291.81	1322.78	1278.31	1361.39	1237.03	1304.81	1413.98	1262.4	1073.51	1149.6	1065.47	1203.51
FBgn0263663	CR43654		ncRNA	0	1	3.017	0.004993	0	0	0.018	0.064	0	0	0	0	0	0	0	0
FBgn0027081	ThrRS		protein_coding	0.04794	0.6513	0.0772	0.3167	109.027	120.932	105.699	106.304	104.035	110.892	113.585	115.239	107.933	106.311	97.352	106.845
FBgn0036691	beg	MCAT	protein_coding	-0.005532	1	0.05251	0.6841	30.224	40.299	29.735	35.482	30.7	29.142	32.149	37.217	36.985	31.985	30.674	30.989
FBgn0051693	CG31693		protein_coding	-0.01499	0.9221	-0.1209	0.8203	0	0	0	0.013	0	0	0.014	0	0.013	0.013	0	0
FBgn0034398	CG15098		protein_coding	0.03798	0.7902	1.439	1.307e-22	407.342	715.115	648.901	560.673	222.557	233.806	233.371	243.161	198.013	222.728	213.362	213.15
FBgn0038390	Rbf2		protein_coding	-0.1493	0.1528	-1.381	3.245e-25	18.386	15.728	13.389	13.116	35.518	35.644	27.738	28.755	37.675	42.483	43.437	36.409
FBgn0026090	CG14812		protein_coding	-0.003736	1	0.5174	8.18e-06	31.608	40.405	40.052	41.629	25.222	26.451	27.135	26.041	25.031	26.082	27.145	27.403
FBgn0033754	Ak6	AK6	protein_coding	0.07247	0.493	0.1973	0.1709	49.581	35.448	38.339	41.943	38.073	39.911	51.301	36.807	30.798	37.284	31.597	42.97
FBgn0032485	CG9426		protein_coding	-0.0663	0.4882	-0.6089	2.588e-14	32.399	28.161	31.044	28.436	44.361	42.107	39.692	42.887	42.749	49.714	49.389	42.841
FBgn0030347	CG15739		protein_coding	-0.2782	0.09138	1.056	6.933e-06	4.601	8.027	6.969	7.538	2.246	2.137	1.2	1.858	3.725	2.8	3.081	2.485
FBgn0264305	CG43783		protein_coding	-0.1256	0.1676	-0.7011	3.234e-12	10.26	8.983	9.454	8.856	13.591	13.877	12.541	12.384	14.363	16.237	16.222	15.14
FBgn0035827	Srp9	SRP9	protein_coding	-0.06139	0.5215	-0.3742	6.706e-07	76.004	66.773	69.498	70.458	85.18	83.792	86.796	85.048	100.132	92.38	87.864	88.029
FBgn0050416	CG30416		protein_coding	0	1	0.7287	0.2662	0	0	0.017	0.03	0	0	0	0	0	0	0	0
FBgn0026415	Idgf4		protein_coding	-0.0005932	1	-0.2265	0.4194	87.498	99.722	94.904	87.901	130.835	124.028	92.26	110.447	113.141	116.494	122.772	106.993
FBgn0037525	CG17816		protein_coding	0.03176	0.8197	1.887	2.478e-10	11.256	11.16	11.184	14.914	3.151	3.923	4.498	3.634	3.115	3.01	2.839	3.802
FBgn0004101	bs		protein_coding	-0.01251	0.9605	-0.4454	0.01609	6.927	6.392	6.491	6.94	10.126	9.139	7.978	9	8.897	10.024	10.046	8.96
FBgn0266669	Sec3		protein_coding	0.02934	0.8532	-0.09302	0.2847	21.804	21.792	24.231	21.54	25.608	24.366	26.388	23.095	23.145	24.684	24.853	22.808
FBgn0015268	Nap1		protein_coding	0.04324	0.7279	0.02407	0.8327	666.642	766.914	619.028	680.323	686.14	679.759	765.897	738.672	698.258	657.584	615.544	714.78
FBgn0004868	Gdi	GDI1,GDI2	protein_coding	-0.003287	1	0.3138	0.0002788	253.012	282.075	273.544	292.899	214.04	200.392	213.927	248.243	249.208	211.799	213.273	206.736
FBgn0036029	CG16719		protein_coding	-0.01292	0.9403	0.5518	0.2726	0.035	0	0.057	0.102	0	0.023	0.027	0	0	0.025	0	0.048
FBgn0031974	CG12560		protein_coding	-0.03039	0.8345	0.3105	0.1934	21.788	25.836	23.971	31.499	16.96	17.051	17.041	16.941	21.836	18.337	19.179	19.507
FBgn0039059	CG13829		protein_coding	-0.01188	0.9448	-0.1103	0.855	0	0	0	0	0	0	0	0	0	0.034	0	0
FBgn0003963	ush		protein_coding	0.02746	0.8652	1.655	8.788e-16	12.555	14.323	19.266	15.908	4.972	5.738	5.913	4.822	4.301	4.616	4.989	5.44
FBgn0264493	rdx		protein_coding	-0.04083	0.765	-1.182	6.581e-23	94.286	74.029	77.004	68.061	172.769	161.249	165.931	165.056	162.691	187.672	189.045	183.763
FBgn0036660	CG13025		protein_coding	-0.1302	0.1545	-0.8662	1.037e-17	21.531	19.487	18.92	16.539	32.675	27.98	26.734	31.752	35.565	37.349	37.309	31.307
FBgn0037377	CG1218	HPF1	protein_coding	-0.002909	1	-0.6011	2.083e-08	39.657	39.307	35.257	30.521	52.972	55.095	54.84	58.725	55.078	55.179	58.905	53.736
FBgn0030300	Sk1		protein_coding	0.1452	0.2334	2.953	4.409e-40	4.411	5.104	6.354	5.688	0.768	1.084	1.073	1.004	0.489	0.746	0.879	0.648
FBgn0262636	dati		protein_coding	0.06054	0.5727	0.2755	0.4392	1.022	0.238	1.53	1.813	0.574	1.364	2.019	1.723	0.599	0.707	0.469	1.368
FBgn0030376	CG2750		protein_coding	0.2976	0.1084	0.7497	0.1189	0.059	0.04	0.064	0.047	0.055	0.189	0.05	0.052	0.015	0.028	0	0.031
FBgn0086347	Myo31DF	MYO1G	protein_coding	0.08161	0.4148	0.2206	0.06954	23.695	24.522	28.264	23.439	24.776	23.26	26.009	24	19.645	20.899	23.818	20.709
FBgn0264268	CR43768		ncRNA	0	1	0	1	0	0	0	0	0	0	0	0	0	0	0	0
FBgn0036007	path		protein_coding	0.01641	0.9383	0.04186	0.9027	227.062	185.688	195.046	236.872	189.207	212.845	267.651	237.483	196.752	199.936	176.918	236.931
FBgn0265713	CR44520		ncRNA	0	1	3.358	0.004433	0.058	0.088	0.117	0.083	0	0	0	0	0	0	0	0
FBgn0034494	CG10444	SLC5A6	protein_coding	-0.01797	0.9363	-0.07101	0.7531	38.536	35.551	35.961	38.148	34.923	38.756	36.359	36.426	37.794	40.253	42.143	36.735
FBgn0031244	CG11601		protein_coding	-0.02924	0.8611	-0.01232	0.9421	17.3	21.651	17.195	17.626	16.725	15.735	18.64	19.065	20.905	18.97	16.137	18.354
FBgn0035985	Cpr67B		protein_coding	-0.002408	1	2.92	2.611e-08	0.871	1.342	2.362	1.122	0.241	0.274	0.058	0.115	0.028	0.324	0.179	0.178
FBgn0001128	Gpdh	GPD1,GPD1L	protein_coding	-0.1024	0.1896	-0.2539	0.0008126	62.107	61.377	64.271	64.526	70.009	66.145	66.345	65.815	70.728	78.866	76.436	75.93
FBgn0267242	CR45682		ncRNA	0.05437	0.625	2.853	1.876e-10	1.169	1.074	1.754	1.8	0.138	0.356	0.379	0.303	0.145	0.154	0.256	0.218
FBgn0003204	ras	IMPDH1	protein_coding	-0.03272	0.8301	-0.3261	0.0009989	87.649	91.885	79.915	84.254	96.179	94.811	109.224	110.783	112.719	110.202	104.334	107.076
FBgn0027079	ValRS		protein_coding	0.0808	0.4058	0.1271	0.2656	55.581	48.247	47.826	50.974	48.371	51.035	59.445	51.315	43.523	47.015	45.001	49.279
FBgn0022288	l(2)09851	GRWD1	protein_coding	-0.0008168	1	-0.08969	0.5328	63.781	71.68	54.614	57.962	61.388	66.23	72.921	63.921	66.998	66.577	61.541	69.82
FBgn0261479	nero		protein_coding	-0.0126	0.9628	-0.2222	0.07806	61.951	69.576	57.948	61.329	74.55	71.545	64.726	76.327	78.218	74.986	72.723	69.163
FBgn0032077	CG9515		protein_coding	-0.04873	0.6845	-0.3456	0.004602	18.987	17.646	16.045	16.841	20.394	18.881	21.234	20.681	23.245	21.812	22.507	21.857
FBgn0038279	Sdr		protein_coding	-0.001826	1	-0.3649	0.2551	2.44	2.708	2.319	1.601	4.368	3.492	2.26	3.269	2.88	3.535	4.684	2.527
FBgn0034933	CG3735	UTP25	protein_coding	0.03271	0.8257	-0.4555	1.931e-07	18.253	14.62	16.84	15.542	25.357	25.105	22.855	21.495	21.806	23.159	22.935	22.342
FBgn0051755	SoYb		protein_coding	0.03323	0.8251	-0.3177	0.0198	16.933	13.242	15.838	12.949	21.099	22.861	18.469	18.179	17.773	18.189	20.114	18.519
FBgn0004858	elB		protein_coding	0.3711	0.04343	3.428	5.446e-53	7.185	9.056	14.37	13.054	1.35	1.489	2.076	1.596	0.985	0.779	0.908	1.335
FBgn0030328	Amun		protein_coding	0.02006	0.9238	-0.1603	0.03415	86.209	79.199	87.804	83.616	99.202	98.038	95.679	94.278	90.02	98.472	97.196	91.574
FBgn0025637	SkpA	SKP1	protein_coding	-0.01026	0.9735	0.03968	0.6493	136.347	135.807	150.977	160.225	142.725	144.15	135.96	136.867	136.095	142.744	142.522	145.979
FBgn0033058	CCHa2-R	NMBR,GRPR	protein_coding	-0.001666	1	3.364	0.001511	0.052	0.013	0.053	0.066	0	0	0.01	0	0	0.009	0	0
FBgn0034924	CG17658		protein_coding	-0.159	0.169	-1.339	1.36e-14	6.016	4.935	4.229	3.434	10.529	9.035	7.924	8.729	11.375	12.552	13.705	10.584
FBgn0005655	PCNA	PCNA	protein_coding	-0.04372	0.7302	-0.5302	5.024e-07	207.325	240.179	180.673	215.859	301.667	278.382	249.946	312.967	303.968	320.359	324.188	287.644
FBgn0039403	Sld5	GINS4	protein_coding	0.002608	1	-0.3642	0.007613	24.534	27.046	22.4	25.671	33.69	33.881	27.55	36.114	34.959	32.67	31.953	30.888
FBgn0033379	Mys45A	SDAD1	protein_coding	0.01868	0.9371	-0.05523	0.6678	42.611	35.388	37.262	38.461	42.316	42.692	42.558	38.297	39.292	38.353	39.551	42.801
FBgn0039136	CG5902	AMMECR1,AMMECR1L	protein_coding	0.0145	0.9557	0.629	7.676e-08	59.404	64.09	60.526	68.812	41.103	42.199	38.651	43.375	38.899	40.671	39.766	41.018
FBgn0265453	CR44353		ncRNA	-0.01386	0.9319	1.227	0.09402	0.229	0.116	0.093	0.165	0	0	0	0	0	0	0.09	0
FBgn0029814	CG15765		protein_coding	0.02304	0.8373	3.391	0.003136	0.017	0.053	0.014	0.013	0	0	0	0.011	0	0	0	0
FBgn0032698	CG10336		protein_coding	-0.1816	0.1069	-1.098	1.334e-14	27.532	27.401	19.677	23.249	43.359	43.926	36.612	41.314	55.402	57.728	55.967	45.856
FBgn0035968	Slc45-1	SLC45A2	protein_coding	0.02933	0.8315	1.379	0.001151	3.725	4.111	6.69	5.619	1.183	1.736	2.839	2.704	1.933	1.16	1.047	2.308
FBgn0266768	CR45233		ncRNA	-0.0501	0.6735	-0.8941	3.295e-05	4.402	4.257	3.939	2.849	6.412	6.219	6.307	6.601	7.045	8.107	7.627	7.94
FBgn0260985	RfC4	RFC2	protein_coding	-0.05202	0.656	-0.4287	0.0005144	64.256	67.262	54.668	59.248	81.992	70.43	67.547	82.119	86.285	86.705	85.039	77.705
FBgn0026207	mbo	NUP88	protein_coding	0.04446	0.684	0.109	0.1276	30.859	33.797	30.94	32.991	31.733	33.421	29.826	30.532	28.453	30.004	30.324	30.286
FBgn0052344	CG32344	DDX54	protein_coding	0.04369	0.7334	-0.2081	0.1189	37.908	38.04	36.265	32.377	43.064	47.806	52.675	41.561	37.037	44.117	44.374	43
FBgn0016685	Nlp		protein_coding	0.03268	0.8288	0.1943	0.04262	472.021	507.277	401.338	475.293	415.183	414.277	441.826	429.608	410.388	396.659	377.969	429.895
FBgn0250837	dUTPase	DUT	protein_coding	-0.0121	0.963	-0.1847	0.2781	268.339	378.132	227.582	271.146	324.416	318.482	244.698	384.05	385.109	325.777	328.701	279.391
FBgn0004666	sim		protein_coding	0.07406	0.5071	2.1	1.978e-11	28.037	36.096	50.581	44.406	9.248	13.308	15.721	12.577	8.478	8.604	7.849	11.407
FBgn0267428	CG45781		protein_coding	-2.557	0.0003094	-0.5209	0.1614	0.544	0.598	0.717	0.562	0.132	0.255	0.166	0.095	1.134	1.43	1.264	0.876
FBgn0054046	CR34046		ncRNA	0.02202	0.8801	-0.005065	1	0.431	0.174	0.698	0.436	0.365	0.453	1.181	0.629	0.321	0.491	0.136	0.81
FBgn0034689	CG2921	ARMT1	protein_coding	0.01533	0.9515	-0.3424	0.01016	21.045	21.527	20.172	21.044	29.109	28.518	25.722	28.487	27.067	26.282	28.645	25.899
FBgn0278600	CG46270		protein_coding	0	1	0	1	0	0	0	0	0	0	0	0	0	0	0	0
FBgn0001224	Hsp23		protein_coding	-0.005356	0.9997	1.499	2.69e-05	105.275	130.117	113.111	107.55	43.807	48.876	15.588	32.158	41.972	36.342	26.438	41.618
FBgn0001981	esg		protein_coding	0.01688	0.9291	4.622	1.334e-22	0.807	1.124	0.981	1.277	0.012	0.033	0.115	0.041	0.025	0.036	0.04	0.056
FBgn0040395	Unc-76	FEZ1,FEZ2	protein_coding	-0.03386	0.8204	-0.2593	0.0529	16.83	17.004	19.64	16.673	20.632	19.569	18.834	19.685	20.015	22.338	22.86	19.744
FBgn0019643	Dat		protein_coding	0.006326	0.993	2.916	2.056e-20	11.752	17.665	25.329	19.436	2.651	2.757	2.038	2.591	2.399	2.197	2.144	2.898
FBgn0003965	v	TDO2	protein_coding	0.0408	0.7194	2.48	0.0001621	3.369	3.412	4.439	3.918	0.933	0.963	1.161	0.928	0.633	0.564	0.509	0.669
FBgn0035523	Ctl1		protein_coding	-0.0239	0.9044	0.2099	0.07573	26.766	31.975	38.324	29.049	26.238	27.247	24.53	25.258	26.174	28.292	27.658	26.159
FBgn0025885	Inos	ISYNA1	protein_coding	0.02839	0.8448	1.565	3.303e-06	139.693	256.523	271.795	228.019	78.119	79.276	89.629	92.064	73.282	65.791	68.935	73.299
FBgn0039150	CG13605		protein_coding	-0.106	0.1205	-0.3067	1.142e-06	26.785	28.03	26.616	26.71	31.297	30.129	28.168	30.651	33.374	35.401	35.001	30.398
FBgn0259683	Ir40a		protein_coding	-0.05586	0.5951	3.09	2.289e-07	0.71	0.575	0.523	0.895	0.018	0.051	0.088	0	0.125	0.055	0.071	0.043
FBgn0030793	CG9125		protein_coding	-0.05988	0.5717	-0.1079	0.3384	19.419	23.888	20.068	21.961	20.654	20.047	20.058	22.775	25.047	22.676	22.629	21.888
FBgn0028426	JhI-1	ELAC2	protein_coding	0.4866	0.0006904	0.4179	0.001276	17.401	14.988	15.368	17.163	17.462	17.614	19.49	16.049	9.699	11.455	11.166	15.402
FBgn0032704	Jwa	PRAF2	protein_coding	0.007324	0.9918	0.5333	9.526e-15	119.593	133.933	129.858	128.245	87.424	89.589	87.579	90.071	83.467	87.661	87.736	92.508
FBgn0032511	ND-B22	NDUFB9	protein_coding	0.01736	0.9433	0.3349	0.0002484	82.659	95.121	84.321	98.589	73.087	70.959	72.114	75.809	73.036	72.517	68.78	69.682
FBgn0033651	Ir48c		protein_coding	-0.01491	0.9223	0.07076	0.9012	0	0.023	0	0	0	0	0	0	0	0	0.018	0
FBgn0005536	Mbs		protein_coding	-0.02303	0.9079	0.1468	0.08109	22.562	22.588	28.29	25.582	22.562	21.801	21.092	20.962	20.758	23.257	22.934	22.302
FBgn0053978	CG33978		protein_coding	0.02192	0.8923	3.773	6.464e-14	0.111	0.268	0.302	0.195	0.013	0.011	0.037	0.016	0.008	0.008	0.013	0.031
FBgn0029924	CG4586		protein_coding	-0.0006999	1	-1.143	0.00121	23.111	25.407	16.511	17.385	52.094	51.01	46.938	64.183	70.82	50.539	49.795	44.345
FBgn0037538	CG3223		protein_coding	-0.07808	0.3785	-0.09729	0.2761	25.721	26.825	25.772	26.969	25.607	27.212	25.022	24.128	28.648	29.673	27.922	26.606
FBgn0039004	Nup133	NUP133	protein_coding	0.0248	0.8896	-0.2659	0.000401	31.154	27.324	27.598	29.639	36.192	37.077	35.766	35.26	34.198	35.843	36.594	33.043
FBgn0032420	CG6583		protein_coding	-0.01346	0.9605	-0.04916	0.7798	32.773	35.028	40.26	32.541	37.471	35.46	31.228	36.565	34.936	37	39.668	34.328
FBgn0037137	Nopp140		protein_coding	0.03206	0.8332	-0.1599	0.3436	133.135	112.349	107.275	123.806	153.237	155.022	145.359	135.654	130.923	133.998	126.629	146.775
FBgn0033934	CG17385		protein_coding	0.03384	0.7843	-0.05117	0.4221	57.507	57.54	55.867	53.814	61.85	59.316	57.905	62.271	59.532	60.387	57.375	55.56
FBgn0050463	CG30463		protein_coding	0.02745	0.8675	-0.4611	0.009475	13.568	12.85	13.328	12.924	17.207	20.43	23.823	21.069	18.674	18.716	17.198	20.717
FBgn0053100	eIF4EHP		protein_coding	-0.04212	0.7505	-0.03648	0.8449	14.411	13.717	17.187	16.588	15.464	13.386	13.958	14.232	15.356	15.71	15.869	16.713
FBgn0034237	eIF3b	EIF3B	protein_coding	0.2262	0.001287	0.07546	0.3065	339.55	326.582	347.999	318.917	350.781	400.305	418.162	357.27	292.398	319.772	305.373	346.397
FBgn0083124	Uhg4		ncRNA	0.02534	0.8846	0.04804	0.8255	60.817	70.334	70.153	59.385	46.981	67.469	98.02	61.313	51.325	61.043	63.219	75.348
FBgn0262509	nrm		protein_coding	0.0304	0.8321	4.922	5.431e-70	3.952	5.983	10.468	7.23	0.258	0.296	0.284	0.208	0.223	0.258	0.134	0.271
FBgn0010316	dap		protein_coding	-0.03953	0.7734	-0.5622	0.0001497	41.514	36.512	39.289	37.71	58.564	52.981	49.273	51.949	53.169	57.994	65.307	59.334
FBgn0004913	Gnf1	RFC1	protein_coding	-0.1455	0.06206	-0.9238	9.192e-34	58.356	47.348	49.047	46.707	91.949	82.259	76.704	79.541	89.331	101.45	103.893	90.8
FBgn0035557	CG11353		protein_coding	0.07587	0.4992	1.488	0.0004648	3.093	3.008	4.992	4.915	0.929	1.904	3.18	2.13	0.987	1.164	0.688	2.052
FBgn0036298	nst	PGM3	protein_coding	-0.02549	0.8903	-0.6335	1.185e-10	42.055	41.194	37.841	41.369	64.795	62.037	57.102	60.533	65.861	63.127	66.917	59.591
FBgn0000071	Ama		protein_coding	0.1708	0.221	0.9527	0.01819	0.079	0.06	0.127	0.156	0.083	0.103	0.135	0.072	0.059	0.042	0.016	0.053
FBgn0033890	Ctf4		protein_coding	-0.09771	0.3365	-1.108	4.661e-15	25.21	26.09	21.87	22.879	48.78	41.307	38.831	46.589	55.997	54.305	56.059	46.067
FBgn0040383	CG5254		protein_coding	0.03042	0.8244	2.997	1.558e-13	5.566	10.858	12.773	13.581	1.205	1.747	1.506	2.103	1.303	1.28	1.148	1.449
FBgn0053051	CG33051		protein_coding	0.2279	0.07774	0.6338	6.51e-05	22.866	19.492	19.43	23.102	15.458	17.863	21.516	17.745	12.119	12.896	10.121	17.533
FBgn0025814	Mgstl	PTGES,MGST1	protein_coding	-0.003777	1	0.1551	0.4696	26.955	36.981	33.935	31.983	28.552	28.661	25.119	30.407	28.957	30.062	25.933	29.537
FBgn0030683	CG8239	MVD	protein_coding	-0.06754	0.5336	-0.117	0.5052	17.917	17.766	19.656	20.443	18.91	17.16	15.694	18.275	21.395	19.31	22.613	19.59
FBgn0030510	CG12177		protein_coding	0.004832	1	-0.1598	0.5909	14.015	35.832	23.618	16.71	18.705	25.042	29.148	36.395	37.196	21.966	21.344	25.082
FBgn0010520	Bka	FCF1	protein_coding	0.02028	0.9261	-0.3253	0.0005249	37.276	35.344	33.918	32.669	46.237	44.201	47.466	43.463	43.69	44.398	43.699	43.727
FBgn0003483	spn-E	TDRD9	protein_coding	-0.04573	0.7115	0.004506	1	47.421	43.499	47.298	49.557	44.154	43.891	37.896	36.915	42.214	48.021	52.554	44.334
FBgn0263241	Mocs1	MOCS1	protein_coding	-0.04303	0.7366	-0.02521	0.911	9.55	10.148	10.289	9.85	9.602	8.703	9.163	8.267	9.295	10.548	10.695	10.089
FBgn0031920	CG6441		protein_coding	0	1	2.785	0.007054	0	0.057	0.046	0.027	0	0	0	0	0	0	0	0
FBgn0264491	how		protein_coding	0.03013	0.8423	1.075	5.868e-08	27.815	29.779	44.034	34.648	15.962	17.939	18.278	16.388	14.378	14.655	15.234	17.032
FBgn0000036	nAChRalpha1		protein_coding	4.885	1.063e-11	5.941	1.408e-19	0.246	0.277	0.444	0.536	0.123	0.255	0.148	0.152	0.005	0.002	0.011	0.002
FBgn0039328	CHKov2		protein_coding	0.03326	0.8009	2.452	9.725e-08	5.274	8.544	13.907	9.282	2.052	2.08	2.552	1.959	1.728	1.523	1.666	1.558
FBgn0085273	CG34244		protein_coding	0.0256	0.8305	1.614	0.02764	0.138	0.093	0.224	0.267	0.065	0.061	0.035	0.084	0.034	0	0	0.093
FBgn0032701	CG10341		protein_coding	0.08726	0.3911	0.3078	0.02218	26.762	25.9	29.802	24.185	22.625	27.443	29.833	20.448	18.715	21.171	21.425	23.618
FBgn0013467	igl		protein_coding	-0.01245	0.9416	2.167	0.02806	0.04	0.04	0.032	0.029	0	0	0	0	0	0.009	0	0
FBgn0266739	CR45212		ncRNA	-0.05371	0.6361	0.04227	0.8773	6.931	7.603	6.738	4.676	5.637	5.088	4.401	4.924	8.431	5.768	5.109	5.585
FBgn0014011	Rac2	RAC2	protein_coding	0.01059	0.9726	1.039	1.035e-11	44.248	49.028	68.353	59.053	23.836	26.2	30.584	26.58	23.212	24.6	26.006	30.177
FBgn0037315	Cerk		protein_coding	-0.01748	0.9403	-0.09986	0.6114	42.341	44.013	40.024	41.119	44.921	39.809	37.984	48.067	48.633	45.322	46.572	40.572
FBgn0034068	casp	FAF1	protein_coding	-0.01362	0.9605	-0.3253	0.001319	50.594	43.203	47.72	48.361	62.424	57.057	58.266	56.514	55.545	59.813	64.133	60.453
FBgn0044452	Atg2	ATG2B,ATG2A	protein_coding	-0.009204	0.9826	0.1033	0.3131	23.224	21.656	26.561	23.968	22.317	21.837	22.703	20.444	21	23.42	22.552	21.65
FBgn0259111	Ndae1		protein_coding	0.01933	0.9168	1.997	4.513e-05	2.119	2.069	3.087	3.346	0.69	0.784	0.83	0.65	0.759	0.75	0.449	0.466
FBgn0053523	CG33523		protein_coding	-0.08372	0.3327	0.2083	0.01358	35.092	35.919	38.881	37.06	27.303	27.45	29.863	29.157	29.883	31.72	33.326	31.831
FBgn0032059	PrBP	PDE6D	protein_coding	0.05489	0.6165	0.2657	0.0096	21.8	24.056	23.43	26.662	23.248	22.361	19.028	22.132	19.076	19.858	20.947	19.465
FBgn0039233	CG7006	NIP7	protein_coding	-0.01976	0.9296	0.184	0.1846	68.693	90.445	65.014	66.557	56.301	58.008	58.76	68.993	82.691	53.504	58.94	58.455
FBgn0036733	U4-U6-60K	PRPF4	protein_coding	-0.0596	0.5527	-0.5156	7.179e-10	32.865	30.382	28.553	29.598	46.648	44.895	33.479	35.987	42.768	45.096	45.689	41.443
FBgn0025366	Ip259	NSA2	protein_coding	0.02918	0.8611	0.2143	0.06999	203.729	214.697	243.114	214.374	188.4	204.025	216.484	184.916	166.588	186.01	176.702	220.162
FBgn0260658	CG42541		protein_coding	0.05199	0.6464	2.773	1.864e-13	0.276	0.315	0.325	0.279	0.039	0.088	0.042	0.07	0.05	0.051	0.047	0.024
FBgn0036254	CG5645	KRI1	protein_coding	-0.01156	0.9686	-0.5903	3.281e-05	18.901	14.203	15.268	15.828	24.866	24.841	25.408	21.323	22.791	24.818	25.245	26.544
FBgn0025456	CREG	CREG1	protein_coding	0.01013	0.9732	0.9562	9.243e-08	48.721	48.528	57.903	50.104	27.364	25.558	28.008	23.536	22.245	23.978	29.089	25.521
FBgn0036732	Oatp74D		protein_coding	0.02278	0.9082	2.323	1.994e-44	6.243	7.414	11.82	9.513	1.937	2.092	1.581	1.859	1.518	1.671	2.017	1.765
FBgn0036686	CG7728	BMS1	protein_coding	0.04542	0.7173	-0.1967	0.1227	46.912	39.105	39.068	39.257	53.652	55.214	53.922	45.343	43.848	49.609	48.961	47.387
FBgn0259227	CG42327		protein_coding	-0.02609	0.8843	0.2029	0.1778	15.816	15.001	23.317	16.699	13.929	14.248	15.032	13.711	14.451	14.913	15.389	16.101
FBgn0034160	CG5550		protein_coding	-0.001718	1	1.168	0.08828	0	0	0	0.265	0.029	0	0	0.025	0	0	0.032	0.027
FBgn0261588	pdm3		protein_coding	0.6561	0.01131	3.209	2.155e-39	0.476	0.597	0.875	0.734	0.101	0.177	0.168	0.117	0.079	0.071	0.051	0.086
FBgn0034763	RYBP		protein_coding	-0.05383	0.6048	-0.7404	8.011e-21	31.379	24.711	23.557	26.652	44.617	41.356	40.061	40.563	44.174	46.285	45.414	43.32
FBgn0022069	Nnp-1		protein_coding	0.05458	0.6217	-0.1	0.3818	65.498	55.964	60.146	60.646	72.299	73.398	75.744	64.152	60.616	67.66	66.362	65.762
FBgn0037750	Whamy		protein_coding	0.1004	0.391	3.669	1.373e-18	0.945	1.223	1.56	1.67	0.173	0.115	0.253	0.181	0.026	0.112	0.152	0.118
FBgn0035390	scramb2	PLSCR1	protein_coding	-0.05553	0.5953	0.2442	0.005383	45.081	51.921	60.956	56.391	41.98	41.6	40.834	42.044	41.726	46.772	46.53	45.213
FBgn0028662	VhaPPA1-1	ATP6V0B	protein_coding	-0.01702	0.9433	0.1869	0.01873	157.322	172.214	180.815	184.777	151.336	140.786	145.752	157.141	152.718	153.104	152.248	150.948
FBgn0032586	Tpr2		protein_coding	0.1072	0.09894	0.1813	0.002572	95.807	88.143	100.776	105.292	94.166	96.623	96.677	94.653	82.422	87.597	84.066	89.399
FBgn0034253	CG10936		protein_coding	1.634	6.538e-08	1.563	4.358e-08	11.733	9.799	10.778	11.323	12.146	8.966	18.21	9.054	3.241	3.358	2.662	4.794
FBgn0028406	Drep4		protein_coding	-0.008365	0.9867	-0.02917	0.8461	19.42	17.121	19.053	17.219	20.087	18.4	19.074	15.525	17.21	17.881	19.305	19.979
FBgn0020621	Pkn		protein_coding	-0.02326	0.9058	-0.2511	0.001774	17.506	15.84	19.075	17.732	21.178	20.608	19.762	19.638	20.166	21.048	21.409	21.231
FBgn0030073	CG10962	DHRS11	protein_coding	0.01523	0.9477	0.1736	0.5054	2.812	2.956	3.346	3.114	2.996	3.347	3.581	1.496	2.704	2.793	2.277	2.701
FBgn0003721	Tm1		protein_coding	0.02176	0.9201	0.7751	1.987e-11	63.055	75.806	91.586	84.654	45.358	47.77	50.293	45.293	42.988	45.409	43.555	48.453
FBgn0026778	Rad1	RAD1	protein_coding	-0.1112	0.2458	-0.5281	4.753e-06	17.34	15.47	13.714	16.314	21.12	17.716	17.197	21.494	25.328	23.248	23.379	20.19
FBgn0085343	Sws1		protein_coding	-0.1112	0.2458	-0.5281	4.753e-06	17.34	15.47	13.714	16.314	21.12	17.716	17.197	21.494	25.328	23.248	23.379	20.19
FBgn0027094	AlaRS	AARS	protein_coding	0.04273	0.723	-0.1342	0.1055	112.995	105.564	100.556	105.207	117.298	120.468	133.885	122.65	118.118	114.885	112.821	120.821
FBgn0038088	CG10126	CAPSL	protein_coding	0.07849	0.4863	4.892	2.152e-44	46.132	61.042	96.158	72.457	2.544	3.007	5.451	2.309	1.776	2.342	1.976	2.809
FBgn0266210	CR44905		ncRNA	-0.01402	0.9291	0.2698	0.6128	0.042	0	0	0.03	0	0	0	0	0	0	0	0.028
FBgn0032218	CG5381		protein_coding	0.2019	0.1326	3.003	9.712e-46	16.141	16.594	24.387	22.116	2.832	3.786	4.263	3.391	1.92	2.191	2.188	3.49
FBgn0263391	hts		protein_coding	-0.008274	0.9868	0.1218	0.3731	36.045	35.019	42.324	39.032	35.037	32.691	36.523	32.552	31.372	34.631	37.657	35.701
FBgn0050383	CG30383		protein_coding	0.08435	0.4447	1.3	1.976e-08	2.691	3.607	2.918	2.975	1.54	1.977	0.965	1.735	1.179	1.412	0.75	1.329
FBgn0038673	CG14286		protein_coding	0.005967	1	-0.3218	0.001727	33.97	34.803	26.22	30.539	41.274	41	38.615	38.774	38.117	40.121	39.032	40.701
FBgn0031436	ND-B17.2	NDUFA12	protein_coding	0.04299	0.7281	0.6211	4.034e-13	63.898	72.413	70.826	81.481	51.171	46.36	50.914	49.773	44.248	46.582	46.384	48.651
FBgn0259143	CG42258		protein_coding	-0.1411	0.1545	0.1474	0.2516	23.902	28.261	33.977	27.751	22.374	19.961	19.242	21.961	26.216	25.98	25.955	24.118
FBgn0011672	Mvl		protein_coding	-0.0287	0.8649	-0.2282	0.04113	24.307	21.432	23.51	23.394	25.304	26.483	26.585	25.225	27.008	27.683	27.906	26.701
FBgn0033087	Hsepi	GLCE	protein_coding	-0.01888	0.9371	-0.0404	0.7494	12.069	11.574	12.232	12.009	11.901	11.407	12.84	11.512	11.804	12.466	11.993	13.039
FBgn0044510	mRpS5	MRPS5	protein_coding	-0.07777	0.4619	-0.7732	7.021e-08	31.415	26.378	26.04	24.976	41.111	41.512	39.699	39.81	42.154	47.653	54.017	48.097
FBgn0266720	Snap24	SNAP25,SNAP23	protein_coding	-0.04665	0.6908	-0.259	0.003938	31.897	29.802	32.57	30.976	35.408	33.249	36.125	35.845	34.661	39.15	40.336	36.55
FBgn0014869	Pglym78		protein_coding	-0.05406	0.6256	-0.6481	1.198e-10	152.097	160.109	138.273	144.15	227.174	200.412	202.471	233.38	237.804	229.677	243.66	234.252
FBgn0003345	sd	TEAD1,TEAD3,TEAD2,TEAD4	protein_coding	0.195	0.1063	1.615	1.83e-23	14.485	15.811	21.81	19.674	6.707	7.779	9.286	7.4	5.003	5.703	5.222	7.234
FBgn0262656	Myc		protein_coding	0.002772	1	0.2793	0.1547	45.102	46.737	52.642	51.137	38.68	37.085	41.489	40.985	37.71	37.869	37.614	43.371
FBgn0028292	ric8a	RIC8B,RIC8A	protein_coding	-0.02157	0.921	-0.5059	1.857e-07	17.766	16.425	15.582	16.136	24.002	22.976	20.962	23.29	25.542	23.645	24.38	21.092
FBgn0032693	Cyp310a1		protein_coding	0.1455	0.2475	2.464	0.000286	0.161	0.117	0.336	0.233	0.049	0.091	0.193	0.07	0.034	0.049	0.018	0.031
FBgn0030797	CG13004		protein_coding	-0.001236	1	0.04052	0.8471	18.111	16.059	19.214	21.623	17.441	17.166	17.986	19.811	17.961	18.421	17.532	18.789
FBgn0032520	CG10859		protein_coding	-0.03131	0.766	3.444	0.0001799	0.121	0.088	0.126	0.188	0	0	0.013	0	0	0.025	0	0.012
FBgn0037955	CG6950	KYAT3	protein_coding	-0.004594	1	-0.1306	0.2	36.724	37.351	37.955	39.723	40.153	39.238	45.434	40.623	43.222	41.789	40.351	41.328
FBgn0266446	CG45076		protein_coding	0.02312	0.8903	5.145	1.553e-59	26.674	45.482	64.182	52.963	1.099	1.915	1.723	1.231	1.234	1.32	0.794	1.81
FBgn0015808	ScpX	SCP2	protein_coding	0.03208	0.837	0.8093	1.029e-14	49.037	60.735	51.605	59.136	29.8	29.112	34.254	38.083	30.653	30.98	30.82	31.291
FBgn0037717	CG8301		protein_coding	-0.002806	1	-0.9616	0.0006626	6.71	7.533	7.118	5.002	15.016	13.412	14.557	14.215	14.265	14.826	14.356	14.795
FBgn0035719	tow		protein_coding	0.01098	0.9605	5.188	1.878e-13	0.516	0.435	1.161	0.621	0.01	0.028	0.022	0.017	0.011	0.02	0.011	0.019
FBgn0266259	CG44954		protein_coding	-0.0112	0.9568	-0.588	0.2613	0	0	0	0.072	0	0.033	0.038	0.121	0.037	0.035	0.078	0.1
FBgn0032507	CG9377		protein_coding	0	1	0.9302	0.169	0	0.098	0	0	0	0	0	0	0	0	0	0
FBgn0040382	CG5273		protein_coding	-0.1672	0.09935	0.183	0.1421	21.427	24.698	26.597	25.647	18.201	17.41	15.822	17.719	19.996	22.074	21.452	22.56
FBgn0031875	CG3430	MCMBP	protein_coding	-0.1348	0.1348	-0.9906	6.805e-24	30.968	28.747	25.826	28.562	53.25	47.199	44.386	48.725	56.489	58.816	62.196	52.376
FBgn0032873	CG2614	EEF1AKNMT	protein_coding	-0.114	0.09894	-0.4544	2.246e-12	23.322	22.219	20.77	21.744	29.306	25.582	26.305	26.517	31.848	30.745	28.878	29.663
FBgn0034939	thoc5	THOC5	protein_coding	-0.01052	0.9735	-0.2863	0.01159	24.557	24.428	22.574	23.142	30.02	30.137	26.413	27.584	30.252	27.5	31.056	27.743
FBgn0031307	MFS3		protein_coding	0.03269	0.7909	3.311	5.998e-07	0.151	0.458	0.55	0.341	0.04	0.05	0.101	0.034	0.014	0.013	0.045	0.063
FBgn0040009	CG17490		protein_coding	-0.4635	0.0001024	-1.117	1.206e-24	9.157	8.02	10.185	8.924	15.387	14.214	12.921	13.264	18.974	19.983	21.41	19.597
FBgn0040075	rept	RUVBL2	protein_coding	0.03046	0.8486	-0.02752	0.8217	74.722	74.699	62.791	67.41	78.916	76.879	70.827	73.514	71.156	72.582	70.733	70.661
FBgn0027617	CG5808	PPIL4	protein_coding	0.02639	0.884	-0.5716	2.926e-06	18.64	16.411	15.799	13.596	26.487	27.337	25.682	23.83	22.148	26.084	25.17	24.229
FBgn0250819	CG33521		protein_coding	0.03078	0.8279	5.031	1.255e-70	10.09	16.141	27.272	21.357	0.626	0.63	0.796	0.591	0.439	0.438	0.417	0.924
FBgn0031832	CG9596	TRMT6	protein_coding	0.06572	0.5292	0.1681	0.1558	18.815	20.324	18.76	17.906	17.348	19.277	21.698	16.973	16.577	17.099	16.315	17.072
FBgn0263133	mEFG1	GFM1	protein_coding	0.01089	0.9726	-0.5591	7.561e-07	26.747	25.738	23.872	23.817	38.603	40.137	38.677	35.98	38.066	37.275	37.988	36.731
FBgn0261041	stj		protein_coding	-0.02182	0.8916	-0.003547	1	0.037	0.037	0.015	0.026	0.034	0.032	0.009	0.011	0	0.048	0.014	0.049
FBgn0259245	DIP-beta		protein_coding	-0.1466	0.2632	-0.3281	0.314	0.21	0.095	0.082	0.162	0.077	0.071	0.11	0.141	0.183	0.248	0.091	0.277
FBgn0284222	CG46306		protein_coding	-0.003135	1	0.01773	0.9429	18.946	16.775	20.036	22.627	18.472	18.159	18.883	21.011	19.094	19.642	18.693	19.905
FBgn0003371	sgg	GSK3B,GSK3A	protein_coding	0.02324	0.9088	0.2095	0.03956	18.594	18.382	22.72	19.445	17.367	18.474	17.192	17.807	16.348	17.29	17.61	16.836
FBgn0035087	CG2765		protein_coding	0.002006	1	-0.1727	0.4526	30.509	27.757	30.161	29.836	32.119	33.226	36.399	36.156	34.062	34.425	33.983	34.172
FBgn0022153	l(2)k05819	TMEM94	protein_coding	-0.1062	0.2066	-0.3539	3.599e-05	28.374	23.904	27.87	26.579	31.579	29.662	29.822	29.172	32.367	34.618	36.083	34.238
FBgn0034091	mrj		protein_coding	0.02272	0.9143	-0.6152	3.13e-09	30.893	29.125	29.93	27.47	48.654	46.544	46.227	48.889	41.664	48.121	47.728	45.05
FBgn0030343	ATP7	ATP7B	protein_coding	0.02905	0.8625	0.0866	0.4495	25.697	26.171	29.811	27.707	26.912	26.187	27.879	27.206	25.251	25.828	26.149	25.549
FBgn0020626	Osbp		protein_coding	-0.01225	0.9614	-0.00818	0.933	39.412	40.563	43.231	43.21	40.389	41.377	40.821	42.343	41.679	42.915	42.708	40.139
FBgn0033739	Dyb	DTNA	protein_coding	-0.01295	0.9605	0.1458	0.3842	17.335	20.813	22.584	19.908	17.859	17.405	16.414	17.862	17.435	18.366	18.624	17.759
FBgn0026761	Trap1	TRAP1	protein_coding	0.2009	0.00407	0.1774	0.01095	45.826	45.418	44.714	45.706	47.527	46.597	51.589	45.334	37.898	39.72	40.54	42.127
FBgn0035063	CG3594		protein_coding	0.04657	0.7034	0.1139	0.3461	29.861	30.326	26.956	29.463	27.45	29.765	32.036	27.626	27.485	27.146	24.317	28.322
FBgn0051453	pch2	TRIP13	protein_coding	-0.1588	0.1007	-0.1366	0.2493	43.93	50.561	44.289	43.122	42.514	40.253	36.997	44.367	52.317	52.151	51.008	45.356
FBgn0001986	Mtr4	MTREX	protein_coding	0.05248	0.5981	0.09572	0.2057	32.731	32.732	31.71	33.019	31.531	35.847	32.961	29.368	29.031	30.665	30.953	31.031
FBgn0266441	CG45071		protein_coding	-0.0132	0.9557	-0.7167	0.002878	20.5	18.103	17.288	13.649	35.879	28.433	24.031	29.044	31.953	33.057	34.529	26.32
FBgn0022349	CG1910		protein_coding	0.006567	0.9961	0.2033	0.02541	92.891	84.123	88.173	94.732	78.88	79.175	81.307	75.161	75.234	76.233	75.379	84.469
FBgn0262570	CG43110		protein_coding	0.1851	0.2028	2.495	7.86e-09	0.236	0.22	0.292	0.521	0.065	0.079	0.141	0.152	0.065	0.043	0.047	0.062
FBgn0000447	Dhod	DHODH	protein_coding	-0.008469	0.9862	0.2335	0.018	75.586	92.343	68.391	79.008	61.6	66.268	66.717	68.235	74.051	66.439	58.38	67.725
FBgn0001105	Gbeta13F		protein_coding	0.02357	0.9076	0.3951	0.0008149	92.855	97.393	121.77	114.343	84.062	83.551	82.987	85.151	79.66	79.311	81.896	78.913
FBgn0036973	Rbbp5	RBBP5	protein_coding	0.07081	0.4582	0.2572	0.003983	16.94	15.837	15.948	16.69	13.587	15.721	15.895	14.927	13.738	13.452	13.362	13.897
FBgn0083120	Uhg8		ncRNA	0.07329	0.5071	0.442	0.05043	12.95	17.172	16.237	14.432	9.378	12.415	20.264	12.956	7.348	12.261	11.323	11.025
FBgn0015221	Fer2LCH		protein_coding	0.09279	0.3359	1.754	2.552e-53	502.132	583.055	742.481	617.758	195.667	218.386	247.614	180.002	163.993	179.09	190.13	189.143
FBgn0266409	CG45049		protein_coding	-0.02031	0.9264	0.2666	0.02836	16.777	18.512	23.984	19.424	16.205	15.414	15.502	14.988	14.76	16.571	16.913	16.555
FBgn0032247	CG5188	METAP1D	protein_coding	-0.01556	0.9515	0.2299	0.0689	10.123	12.241	11.033	12.108	8.731	10.078	9.6	8.803	10.468	8.727	9.806	9.487
FBgn0003261	Rm62		protein_coding	0.05409	0.5803	0.08441	0.2719	192.685	212.251	214.715	206.211	194.426	223.826	219.992	192.836	173.4	203.6	198.381	202.693
FBgn0038146	CG9799	WDR36	protein_coding	0.1281	0.1991	0.3556	0.004635	51.205	42.68	42.812	46.887	36.309	42.521	52.309	41.416	32.186	35.076	33.781	40.393
FBgn0036816	Indy	SLC13A5,SLC13A1,SLC13A4,SLC13A2,SLC13A3	protein_coding	0.01689	0.9452	0.03983	0.8222	63.816	59.427	68.846	68.982	67.814	68.541	64.4	64.196	59.434	61.866	65.146	66.938
FBgn0037543	CG10903	BUD23	protein_coding	0.03332	0.8217	0.3137	0.0007101	29.607	27.619	26.954	29.06	20.941	24.995	26.25	23.209	22.163	22.954	21.684	23.661
FBgn0015801	Reg-5		protein_coding	0.02186	0.9044	1.519	8.672e-08	34.327	41.237	61.482	53.088	15.199	18.177	20.104	17.557	15.461	14.762	14.903	17.774
FBgn0264785	Hph		protein_coding	-0.06879	0.4922	-0.5556	9.494e-09	28.952	26.522	29.253	25.798	40.124	35.771	34.619	37.298	39.531	43.187	42.341	39.389
FBgn0011259	Sema1a		protein_coding	0.009393	0.9743	0.134	0.6086	2.375	2.971	3.408	2.929	2.45	2.792	3.088	2.591	2.582	2.623	2.528	2.645
FBgn0262560	wcd		protein_coding	0.0452	0.7175	0.08227	0.5086	39.89	38.552	34.217	34.784	35.222	40.944	39.329	35.379	33.355	35.652	32.991	36.82
FBgn0264832	CG44040		protein_coding	0.01849	0.8907	3.951	0.0004759	1.705	0.986	0.789	1.056	0.086	0.08	0.186	0	0.091	0	0	0.082
FBgn0034230	CG4853		protein_coding	-0.1167	0.07463	-0.01065	0.8974	21.609	18.568	23.242	21.347	19.514	19.052	20.049	17.579	20.395	21.366	21.334	22.379
FBgn0035148	CG3402	TAX1BP3	protein_coding	-0.04359	0.7074	-0.2837	0.0001812	40.858	34.152	36.991	36.316	43.242	41.357	44.53	42.224	44.02	48.985	44.578	43.658
FBgn0265711	CR44518		ncRNA	0	1	2.245	0.0212	0.154	0	0.063	0.223	0	0	0	0	0	0	0	0
FBgn0036402	CG6650		protein_coding	-0.08393	0.2993	-0.4468	4.282e-10	17.543	16.181	16.606	16.14	21.88	20.945	18.836	20.874	22.338	23.78	24.16	20.829
FBgn0035498	Fit1	FERMT2,FERMT1,FERMT3	protein_coding	0.05264	0.6391	0.2337	0.02459	38.267	37.767	48.255	41.453	38.642	39.99	38.817	35.478	32.418	35.769	37.189	34.735
FBgn0040793	CG7630		protein_coding	0.004508	1	0.2963	0.005679	280.021	320.306	247.51	290.23	230.805	224.824	231.459	239.359	242.416	229.95	213.393	232.912
FBgn0041629	Hexo2	HEXB,HEXA	protein_coding	-0.06189	0.577	0.3078	0.3066	23.477	31.822	34.841	30.737	11.12	13.154	17.916	17.799	21.929	25.055	19.909	20.935
FBgn0034013	unc-5	UNC5B,UNC5C	protein_coding	0.00254	1	3.516	3.559e-23	0.467	0.606	0.663	0.744	0.072	0.034	0.078	0.036	0.038	0.063	0.035	0.074
FBgn0085383	CG34354		protein_coding	0.1603	0.2334	1.344	0.07954	0	0.017	0.007	0.006	0.018	0.011	0.006	0	0	0	0	0
FBgn0025608	Faf2		protein_coding	0.02614	0.8654	-0.04701	0.4973	62.583	60.542	60.565	59.244	65.906	66.806	62.499	63.31	62.651	65.693	62.022	60.694
FBgn0026598	Apc2		protein_coding	-0.09413	0.2988	-1.179	6.486e-36	18.081	15.25	14.441	12.461	34.153	31.233	27.207	28.033	33.41	36.415	37.11	30.74
FBgn0032899	CG9338		protein_coding	0.06724	0.5432	4.301	4.736e-53	39.395	66.461	88.226	67.734	3.309	4.856	5.307	3.941	2.882	2.735	1.944	5.385
FBgn0015376	cutlet	CHTF18	protein_coding	-0.06142	0.577	-1.039	6.282e-12	12.465	10.744	9.122	10.044	20.023	19.41	19.563	18.448	21.119	22.991	24.307	21.445
FBgn0037541	CG2747		protein_coding	0.0007977	1	0.1119	0.3967	27.227	23.712	28.205	27.253	22.223	24.569	26.816	24.595	24.129	24.037	24.3	25.567
FBgn0083121	Uhg7		ncRNA	0.1596	0.09154	0.3922	0.0001838	479.341	483.251	509.446	500.566	401.853	475.525	525.643	405.87	343.463	374.556	348.211	420.54
FBgn0023091	dimm		protein_coding	-0.1562	0.2363	0.6514	0.1633	0.012	0.047	0.019	0.034	0	0	0	0	0	0.008	0.009	0.023
FBgn0038156	CG14372		protein_coding	0.02726	0.8305	5.826	3.879e-17	0.41	0.484	0.853	0.885	0	0.005	0.028	0.027	0.006	0.005	0.012	0.015
FBgn0262029	d		protein_coding	0.006242	0.9922	4.176	7.124e-17	0.663	0.925	1.155	1.32	0.044	0.045	0.067	0.069	0.056	0.04	0.054	0.059
FBgn0001987	Gli		protein_coding	0.04477	0.7223	1.521	6.573e-20	9.405	9.67	14.15	10.85	3.595	4.405	4.838	4.325	3.123	3.675	4.312	4.011
FBgn0040271	Sulf1		protein_coding	-0.03382	0.8207	0.467	1.356e-05	15.872	15.298	20.907	17.316	11.195	12.489	11.451	11.407	12.014	12.297	11.778	13.468
FBgn0027602	CG8611	DDX31	protein_coding	0.01782	0.942	-0.1664	0.09771	22.244	21.522	19.045	19.716	21.44	24.62	25.895	23.801	24.734	23.161	21.867	23.196
FBgn0034885	Eglp4		protein_coding	0.01345	0.9463	3.98	5.649e-07	0.657	2.318	2.73	1.486	0.18	0.139	0	0.168	0.079	0.106	0.05	0.142
FBgn0013759	CASK		protein_coding	-0.03082	0.8448	-0.2982	0.001517	14.999	15.151	16.46	15.116	18.142	17.819	18.9	17.875	18.015	20.358	19.223	18.818
FBgn0002183	dre4	SUPT16H	protein_coding	-0.008686	0.9807	-0.3909	3.156e-12	97.11	85.153	85.641	86.134	116.438	113.364	119.296	112.167	109.626	117.47	119.561	118.942
FBgn0030710	CG8924		protein_coding	-0.0132	0.9605	-1.035	8.781e-38	28.554	22.733	24.696	21.799	55.703	50.435	45.765	46.339	47.739	52.797	54.457	47.07
FBgn0011746	ana		protein_coding	0.1548	0.2444	5.557	1.804e-55	40.607	60.23	83.449	71.45	1.274	3.302	2.923	1.409	1.232	1.337	0.879	1.721
FBgn0035101	p130CAS	NEDD9	protein_coding	0.1947	0.1349	1.791	9.536e-19	8.199	7.802	9.204	11.24	2.553	3.734	4.712	3.828	2.286	2.282	1.908	3.915
FBgn0035644	DNApol-epsilon58	POLE2	protein_coding	-0.1203	0.2457	-0.699	9.533e-07	16.331	14.954	13.8	15.407	20.074	20.861	19.813	20.676	27.227	25.883	23.183	24.944
FBgn0003447	sn	FSCN2,FSCN1	protein_coding	-0.003563	1	-0.3053	0.2539	47.916	46.509	44.048	44.345	60.162	58.196	58.266	60.534	61.352	63.425	61.019	56.78
FBgn0015271	Orc5	ORC5	protein_coding	-0.02403	0.902	-0.6269	5.006e-12	17.723	18.52	17.186	17.71	29.768	26.014	24.367	26.802	30.298	27.482	25.327	27.987
FBgn0050389	CG30389		protein_coding	-0.06895	0.4438	-0.347	3.046e-06	28.455	26.123	28.714	26.427	32.866	31.662	32.98	31.227	33.179	35.895	36.863	34.298
FBgn0030600	hiw		protein_coding	4.624	2.88e-35	3.892	2.169e-26	1.823	1.825	1.931	2.695	2.102	5.099	4.314	2.201	0.128	0.116	0.132	0.163
FBgn0039056	CenB1A		protein_coding	-0.02876	0.863	-0.06419	0.6824	53.151	50.867	51.992	49.187	49.217	50.297	53.393	48.143	50.791	55.41	54.218	54.798
FBgn0031395	CG10874		protein_coding	-0.02071	0.9238	-0.21	0.08931	30.737	27.34	31.132	30.496	37.222	34.263	30.621	31.606	33.808	37.624	35.488	32.667
FBgn0029935	CG4615		protein_coding	-0.0617	0.5509	-0.803	8.194e-17	14.747	13.127	14.004	12.061	22.561	22.51	21.012	20.533	23.02	24.452	25.527	22.395
FBgn0030268	Klp10A	KIF2C	protein_coding	-0.02259	0.9137	-0.8271	1.249e-23	48.265	41.068	42.38	38.806	77.18	73.925	70.734	73.781	72.737	80.943	79.797	72.176
FBgn0038110	CG8031	MEMO1	protein_coding	0.008449	0.9858	0.6214	2.06e-05	42.731	44.825	46.346	50.39	28.602	29.177	32.427	28.741	27.309	28.555	29.256	31.089
FBgn0015614	CanB2		protein_coding	0.01832	0.9391	-0.08314	0.4556	70.477	75.721	80.874	73.151	81.916	80.928	79.639	86.545	77.537	77.437	83.45	80.335
FBgn0040285	Scamp		protein_coding	0.05124	0.622	0.3286	9.355e-06	50.182	47.675	59.683	54.195	44.511	46.025	44.823	43.925	38.112	44.82	42.614	42.358
FBgn0032195	CG4908	BCS1L	protein_coding	0.03925	0.777	-0.4686	1.563e-05	13.527	12.384	11.829	10.586	16.305	17.388	22.182	16.87	16.119	16.858	17.164	17.536
FBgn0010383	Cyp18a1		protein_coding	0.2265	0.1248	2.925	1.466e-31	38.774	35.515	43.299	50.49	4.958	8.944	9.966	10.24	3.782	5.778	4.021	8.269
FBgn0036108	Cpr67Fa1		protein_coding	0	1	0.8356	0.2223	0	0.21	0	0	0	0	0	0	0	0	0	0
FBgn0264562	Hr4		protein_coding	0.1193	0.3257	1.78	2.537e-06	2.902	2.039	2.436	3.382	0.817	1.293	1.52	1.313	0.707	0.712	0.374	1.143
FBgn0039585	CG1894	KAT8	protein_coding	5.27	3.292e-08	8.395	4.459e-24	9.042	10.949	10.999	10.338	0.987	1.517	0.736	0.523	0.04	0.019	0.021	0
FBgn0026174	SkpD	SKP1	protein_coding	0	1	1.554	0.06211	0	0.059	0.094	0.084	0	0	0	0	0	0	0	0
FBgn0003346	RanGAP		protein_coding	0.01496	0.9515	-0.3484	0.0002595	71.198	67.191	54.198	65.716	88.01	88.049	80.047	83.666	84.05	85.622	81.027	80.732
FBgn0004397	Vinc	VCL	protein_coding	-0.01424	0.958	0.732	1.329e-11	54.907	58.255	64.33	69.351	33.637	33.391	35.237	39.769	38.785	37.029	35.707	34.513
FBgn0035146	CG13893		protein_coding	0.2532	0.09935	2.777	6.252e-32	24.927	26.474	36.557	32.755	4.306	6.701	9.609	6.462	4.69	3.586	3.324	5.817
FBgn0266096	CR44833		ncRNA	-0.0004049	1	-0.4017	0.1934	8.573	8.854	7.431	5.639	13.218	11.158	10.843	11.224	10.662	10.823	12.051	13.067
FBgn0029857	wuho		protein_coding	-0.1006	0.2836	-0.006248	0.9772	32.773	37.683	31.929	34.873	28.096	28.141	29.91	32.322	39.141	34.095	33.786	30.851
FBgn0031164	CG1724	TIMM17A,TIMM17B	protein_coding	0.007764	0.9732	0.3325	0.4693	0	0.046	0.11	0.033	0.064	0	0.035	0.028	0.034	0	0	0.061
FBgn0260995	dpr21		protein_coding	0.4563	0.08024	4.756	4.256e-06	0.077	0	0.374	0.334	0	0.076	0.059	0.07	0	0	0	0
FBgn0002732	E(spl)malpha-BFM		protein_coding	0.03827	0.7366	1.982	0.002033	0.848	0.859	0.458	0.531	0.2	0.223	0.259	0.241	0.084	0.202	0.134	0.114
FBgn0005695	gcl		protein_coding	0.00802	0.9857	-0.631	0.002642	77.887	55.457	59.964	59.627	113.658	110.195	108.393	102.085	96.571	106.763	112.452	103.494
FBgn0025682	scf		protein_coding	0.02552	0.8818	1.648	1.41e-15	83.304	76.874	77.285	125.683	28.564	26.25	34.778	35.666	30.914	25.329	22.005	35.478
FBgn0039277	CG13650		protein_coding	0.7526	0.0133	4.545	3.888e-41	3.153	4.117	5.814	4.558	0.474	0.45	0.348	0.443	0.106	0.193	0.146	0.278
FBgn0037944	CG6923		protein_coding	0.001964	1	-0.418	1.843e-07	13.966	11.072	11.863	13.372	18.57	16.369	16.092	16.794	16.008	16.854	17.591	17.185
FBgn0037667	CG16734		protein_coding	0.1854	0.03176	0.07684	0.4477	16.771	17.454	15.188	16.428	19.646	18.476	18.362	18.87	15.515	14.625	15.564	16.551
FBgn0261873	sdt		protein_coding	0.001345	1	1.338	1.154e-11	8.747	12.019	16.259	13.859	3.909	4.962	5.641	5.02	4.294	5.026	4.638	5.473
FBgn0051133	Slimp		protein_coding	-0.004106	1	-0.1805	0.1104	11.655	10.69	11.121	10.247	12.392	12.026	13.178	11.824	12.119	12.586	13.6	11.496
FBgn0036931	CG14183	IQCA1	protein_coding	-0.03029	0.8286	1.63	2.378e-07	0.536	0.5	0.388	0.876	0.12	0.13	0.107	0.215	0.126	0.131	0.111	0.331
FBgn0027054	CSN4	COPS4	protein_coding	-0.03192	0.8277	0.09501	0.2555	66.344	76.248	60.024	65.094	59.215	59.021	57.154	64.256	68.839	62.936	60.071	58.328
FBgn0051646	DIP-theta		protein_coding	-0.01998	0.8737	-0.06041	0.9167	0	0	0.022	0.01	0.009	0	0	0.008	0.01	0.019	0.01	0
FBgn0262740	Evi5		protein_coding	-0.02668	0.8718	-0.4401	0.02403	18.817	14.382	15.8	16.392	22.016	20.386	21.187	20.326	21.636	24.198	24.515	22.454
FBgn0029746	CG15465		protein_coding	0.02859	0.8397	0.2048	0.5042	5.939	5.703	7.692	7.29	5.826	6.64	7.497	6.612	5.107	5.282	5.561	5.561
FBgn0263773	fok		protein_coding	0.005804	0.9957	-0.2519	0.4043	59.607	59.8	81.559	63.674	91.736	85.044	96.392	86.725	79.265	81.745	82.461	100.125
FBgn0052528	parvin	PARVA,PARVG,PARVB	protein_coding	-0.01746	0.9428	0.1521	0.08205	63.17	77.599	80.621	68.674	66.108	60.172	60.974	66.52	67.211	67.543	65.707	59.887
FBgn0263240	Coop		protein_coding	0.1691	0.1668	1.316	6.254e-12	14.887	18.098	18.934	18.316	9.617	9.548	9.464	9.106	7.195	6.891	6.289	6.882
FBgn0015903	apt		protein_coding	-0.04894	0.6845	0.03186	0.8625	51.973	49.997	60.644	56.48	49.783	49.405	44.693	45.853	50.572	54.891	54.263	54.189
FBgn0001942	eIF4A	EIF4A1	protein_coding	0.08161	0.3423	0.5016	1.711e-10	908.49	1115.42	1096.89	1015.55	761.05	798.334	808.47	848.962	717.327	726.375	707.344	748.684
FBgn0032397	Tom70	TOMM70	protein_coding	0.08673	0.3028	-0.2787	0.0004826	36.494	32.506	30.086	32.082	43.215	44.692	48.085	41.972	34.28	41.244	43.199	41.049
FBgn0052181	CG32181		protein_coding	-0.02764	0.7961	0.5209	0.3514	0.017	0.034	0.014	0.012	0	0	0	0	0.025	0	0	0
FBgn0034511	GNBP-like3		protein_coding	-0.04246	0.674	2.891	0.0001204	0.965	1.579	1.023	0.644	0	0.098	0.057	0.045	0.055	0.106	0.117	0.199
FBgn0028963	Or49b		protein_coding	0	1	0.2684	0.6214	0	0.022	0	0	0	0	0	0	0	0	0	0
FBgn0033631	Sod3		protein_coding	0.005257	1	-0.6049	0.005305	106.936	101.891	100.679	109.592	151.228	170.71	193.004	186.942	176.553	168.89	154.985	184.577
FBgn0038261	CG14856		protein_coding	0.01751	0.9228	3.894	6.431e-13	0.44	0.6	0.558	0.843	0.041	0.05	0.044	0.058	0.057	0	0.03	0.064
FBgn0037855	CG6621		protein_coding	0.03091	0.8449	-0.3222	0.01389	19.332	17.537	18.884	19.892	26.539	29.25	22.839	24.187	23.274	24.698	25.154	22.806
FBgn0264263	CR43763		ncRNA	0	1	0.2619	0.6382	0	0	0	0.065	0	0	0	0	0	0	0	0
FBgn0085421	Epac		protein_coding	0.05568	0.6199	1.072	8.288e-05	2.3	2.968	3.557	3.246	0.928	1.502	2.719	1.626	1.295	1.207	1.062	1.608
FBgn0261514	NimA		protein_coding	-0.002906	1	4.59	7.088e-08	0.332	0.404	0.614	0.423	0.019	0.009	0	0.024	0.03	0	0	0.027
FBgn0038984	AdipoR		protein_coding	0.07586	0.3189	0.5798	2.487e-22	81.02	81.397	88.045	88.729	56.782	57.465	66.457	64.411	58.935	57.009	55.37	54.589
FBgn0013720	pck		protein_coding	0.0003114	1	0.5822	2.111e-08	38.649	50.031	57.173	49.684	33.721	31.103	30.572	33.443	31.616	33.601	33.137	30.433
FBgn0265098	CR44203		ncRNA	-0.04903	0.5991	1.507	0.02491	0.382	0.232	0.186	0.276	0.054	0	0	0	0	0.164	0.06	0
FBgn0285952	eEF5	EIF5A,EIF5AL1,EIF5A2	protein_coding	0.1151	0.107	0.1781	0.01133	1644.57	1520.64	1712.39	1811.42	1624.52	1678.53	1776.55	1585.21	1400.13	1478.92	1408.32	1612.17
FBgn0022359	Sodh-2	SORD	protein_coding	-0.0737	0.5091	0.1742	0.5378	16.106	30.575	22.852	23.203	13.521	18.095	10.627	13.198	23.821	18.722	19.158	16.9
FBgn0085753	28SrRNA-Psi:CR40596		pseudogene	0.02862	0.8188	0.2971	0.4522	0.165	0.223	0.19	0.129	0.049	0.109	0.042	0.487	0.021	0.246	0.065	0.093
FBgn0263144	bin3		protein_coding	-0.03119	0.8339	-0.5796	3.224e-15	55.274	46.677	48.252	48.829	72.996	70.852	70.386	73.269	70.513	76.079	80.01	72.99
FBgn0028399	TMS1		protein_coding	0.05562	0.6123	1.058	2.832e-25	65.434	84.683	96.276	87.574	40.786	45.12	45.736	42.191	41.013	37.829	39.867	39.448
FBgn0032819	CG10463	DUS3L	protein_coding	0.05378	0.6316	-0.002274	1	15.764	16.466	14.158	14.315	16.78	16.682	17.592	15.877	14.26	14.85	15.341	16.292
FBgn0011206	bol	BOLL	protein_coding	0.1017	0.3806	1.5	2.3e-06	1.526	1.479	2.051	1.935	0.444	0.88	1.155	1.012	0.554	0.431	0.318	0.993
FBgn0051125	CG31125		protein_coding	0.4089	0.06095	3.52	4.598e-29	2.083	2.083	2.029	1.506	0.317	0.485	0.221	0.289	0.157	0.169	0.187	0.142
FBgn0037439	CG10286		protein_coding	0.1365	0.1372	0.6523	1.046e-10	48.047	53.996	50.863	51.331	35.039	36.726	45.047	36.109	29.733	31.165	30.139	36.989
FBgn0035833	CG7565		protein_coding	-0.1515	0.0951	-0.6457	4.386e-11	13.18	9.996	10.403	10.529	15.905	13.999	14.293	14.05	16.487	16.919	20.111	16.424
FBgn0037669	Ibf2		protein_coding	-0.05749	0.6072	-0.4878	0.0004759	29.918	28.654	23.494	27.911	38.273	36.885	29.133	34.266	45.85	38.905	39.364	33.724
FBgn0036685	CG6664	CCDC6	protein_coding	-0.04877	0.6419	-0.2382	0.0008159	49.701	43.986	46.62	50.08	56.002	52.247	52.29	51.689	55.23	58.481	57.867	53.723
FBgn0086909	CG31751	HYKK	protein_coding	-0.03512	0.8109	0.6397	2.515e-06	9.422	10.002	12.929	11.074	6.018	6.074	6.72	6.149	7.683	5.952	5.667	7.847
FBgn0052425	CG32425		protein_coding	0.01238	0.9634	-0.1072	0.4359	40.184	40.626	38.455	40.154	42.815	43.112	46.328	45.037	44.016	43.94	41.999	42.531
FBgn0011710	Sep1		protein_coding	0.03411	0.8192	0.05051	0.7211	90.114	83.182	97.667	94.891	93.062	95.873	95.596	93.498	82.432	92.074	89.363	88.744
FBgn0000473	Cyp6a2		protein_coding	0.1567	0.244	4.728	1.817e-24	1.37	2.498	5.44	2.46	0.162	0.21	0.261	0.25	0.136	0.098	0.072	0.107
FBgn0050493	CG30493	COQ9	protein_coding	0.05319	0.6302	0.3653	0.0002119	19.954	18.093	17.324	19.068	15.845	14.902	16.072	15.605	15.348	13.385	14.073	14.457
FBgn0285925	Fas1		protein_coding	0.02725	0.8737	1.425	6.502e-19	95.897	110.256	163.738	118.767	45.269	51.404	51.962	44.41	39.074	44.354	44.949	50.151
FBgn0025355	SuUR		protein_coding	-0.01047	0.9736	-0.6717	4.022e-13	15.178	12.816	14.241	12.501	22.595	23.43	20.392	20.335	20.708	21.985	24.629	20.948
FBgn0266540	CG45101		protein_coding	-0.01047	0.9736	-0.6717	4.022e-13	15.178	12.816	14.241	12.501	22.595	23.43	20.392	20.335	20.708	21.985	24.629	20.948
FBgn0043799	CG31381	TRIT1	protein_coding	0.1003	0.3407	0.03092	0.8837	9.249	7.474	8.004	8.784	10.362	10.651	10.854	9.113	7.157	8.122	7.855	9.58
FBgn0028581	mei-217		protein_coding	-0.2024	0.03746	-0.731	6.172e-13	12.017	9.545	10.583	9.537	14.135	13.845	14.517	13.956	16.903	17.17	18.781	17.395
FBgn0085582	CR41257		ncRNA	-0.049	0.6023	0.5	0.27	0.332	0.168	0.202	0.54	0	0.055	0.063	0.051	0.062	0.237	0.065	0.167
FBgn0262527	nsl1		protein_coding	-0.03258	0.8296	-0.5394	2.7e-09	33.742	30.569	32.363	31.692	46.189	44.773	44.777	43.331	44.536	48.76	50.322	44.918
FBgn0266098	rg		protein_coding	0.02824	0.8439	0.2048	0.5052	5.66	5.45	7.304	6.947	5.545	6.306	7.123	6.3	4.869	5.028	5.292	5.283
FBgn0263076	Klp54D		protein_coding	0.0172	0.9143	2.597	0.002372	0.057	0.058	0.116	0.031	0.01	0	0.022	0.017	0.011	0	0.011	0.01
FBgn0039867	CstF50	CSTF1	protein_coding	0.1078	0.2453	0.2548	0.0192	26.577	31.203	24.723	27.599	26.658	26.706	24.702	29.008	24.63	22.698	22.19	22.024
FBgn0034501	CG13868		protein_coding	0.1823	0.201	2.217	5.945e-10	25.912	26.649	32.332	32.328	8.12	10.197	15.216	9.657	4.729	6.74	6.962	6.119
FBgn0001624	dlg1		protein_coding	0.02107	0.9221	0.8253	1.487e-13	20.983	22.213	29.331	25.075	14.39	15.05	13.132	13.791	12.714	14	12.962	14.362
FBgn0034631	TAF1C-like		protein_coding	-0.04657	0.6882	-0.452	9.551e-08	10.875	10.364	11.51	10.561	15.285	15.128	12.826	12.652	14.336	15.097	16.068	14.25
FBgn0032219	CG4995	SLC25A29	protein_coding	0.0336	0.7806	3.382	1.954e-06	0.533	0.925	0.658	0.679	0.036	0.083	0.019	0.247	0.057	0	0.04	0.136
FBgn0037135	CG7414	EIF2A	protein_coding	0.03642	0.7966	0.2202	0.01733	196.516	243.384	204.888	215.315	181.638	186.859	200.841	207.979	193.334	184.374	170.265	186.901
FBgn0266681	CR45171		ncRNA	-0.8571	0.004799	-0.5441	0.03566	4.779	4.991	3.418	2.942	3.671	2.381	2.817	2.797	5.951	7.564	7.726	4.839
FBgn0033169	CG11123		protein_coding	0.1045	0.1652	0.263	0.0002662	27.442	30.469	26.932	26.427	25.361	26.97	26.593	24.819	23.322	21.939	22.127	24.924
FBgn0037569	tex	THOC3	protein_coding	0.09821	0.3226	0.5133	4.846e-05	24.351	24.329	25.556	25.48	17.503	20.666	22.007	21.311	19.368	16.343	14.799	17.969
FBgn0031361	CG17652	UTP23	protein_coding	0.0518	0.6558	-0.01313	0.9376	13.373	14.09	13.394	11.858	15.711	15.043	14.542	13.332	13.952	12.293	13.61	13.308
FBgn0265529	CR44379		ncRNA	0	1	0	1	0	0	0	0	0	0	0	0	0	0	0	0
FBgn0264815	Pde1c		protein_coding	0.04176	0.7194	5.547	7.702e-23	5.283	8.795	12.611	10.121	0.102	0.369	0.428	0.181	0.157	0.157	0.121	0.258
FBgn0032050	CG13096		protein_coding	0.04355	0.7359	0.04288	0.7832	92.653	85.758	76.808	86.252	91.868	95.901	89.635	86.203	79.278	82.885	81.958	86.683
FBgn0016672	Ipp	INPP1	protein_coding	-0.07975	0.4035	-0.07052	0.5277	44.889	47.027	45.116	50.17	42.59	40.301	42.495	49.355	51.162	50.518	48.135	47.173
FBgn0031016	kek5		protein_coding	0.08569	0.391	0.8318	2.007e-12	18.965	20.133	24.778	23.271	13.81	14.575	13.348	14.002	11.431	12.325	12.55	11.623
FBgn0025582	eIF3e	EIF3E	protein_coding	0.1165	0.1008	0.09515	0.1938	250.211	283.487	246.503	250.558	259.95	279.935	283.608	265.728	248.841	235.564	233.455	245.878
FBgn0025809	Paf-AHalpha	PAFAH1B3,PAFAH1B2	protein_coding	0.01756	0.9428	-0.04111	0.6926	58.1	55.337	54.86	56.009	62.251	57.474	55.483	61.999	56.422	59.358	56.743	58.435
FBgn0002709	mei-218		protein_coding	-0.197	0.04368	-0.6914	1.932e-11	9.822	7.927	8.743	8.05	11.447	11.145	11.709	11.276	13.601	13.818	15.145	14.086
FBgn0261239	Hr39		protein_coding	-0.02149	0.921	-0.3987	5.617e-06	11.423	9.539	10.684	10.12	13.407	13.46	13.538	13.286	13.198	13.899	14.086	14.3
FBgn0032845	CG10747		protein_coding	0.0855	0.4188	0.6085	8.03e-05	11.817	12.202	12.72	11.755	7.779	9.306	10.359	9.874	7.406	6.676	7.521	9.129
FBgn0046776	CR14033		pseudogene	1.584	0.0001153	1.678	1.028e-05	48.978	38.012	37.629	34.399	45.417	50.318	37.603	33.36	10.477	12.601	11.835	10.929
FBgn0260768	CG42566		protein_coding	0.2475	0.09189	3.803	3.065e-75	46.118	63.062	76.464	80.444	5.173	8.177	8.176	6.641	3.686	4.623	3.77	6.735
FBgn0051612	CG31612		protein_coding	0.001786	1	-0.6212	0.01782	2.116	1.5	1.597	1.578	3.293	3.536	2.257	2.76	2.754	2.979	3.07	2.917
FBgn0040104	lectin-24A		protein_coding	0.01121	0.9511	0.5566	0.331	0	0	0	0.057	0	0	0	0.024	0	0	0	0
FBgn0029896	CG3168		protein_coding	0.103	0.377	1.193	0.0001268	9.716	14.959	24.662	17.932	4.916	8.55	14.851	11.999	6.459	6.297	4.041	9.319
FBgn0033195	CG1360		protein_coding	-0.04117	0.7614	-0.7915	4.28e-09	9.053	8.065	8.216	8.274	13.56	13.247	14.94	12.682	13.841	15.957	13.628	16.366
FBgn0037061	CG12975		protein_coding	0.01591	0.9513	-0.0941	0.444	43.235	36.801	34.236	34.911	43.562	40.929	42.143	37.913	37.241	40.756	37.756	43.732
FBgn0029766	CG15784		protein_coding	0.02686	0.8627	2.223	4.273e-15	7.735	12.207	13.759	10.631	2.013	3.24	3.765	1.788	1.83	2.491	2.666	2.371
FBgn0283535	Vha26	ATP6V1E2,ATP6V1E1	protein_coding	-0.01302	0.9607	-0.09161	0.4662	169.639	155.179	198.358	178.918	186.426	182.152	193.637	169.153	170.405	187.681	189.787	202.636
FBgn0034786	CG13531		protein_coding	0.03412	0.8192	0.0949	0.5093	17.602	13.559	16.595	18.515	16.894	16.261	17.624	15.885	14.29	14.702	16.747	16.061
FBgn0029813	CG15766		protein_coding	-0.08081	0.4714	0.1372	0.6185	5.833	7.848	6.02	6.642	4.295	3.808	3.47	4.914	7.647	5.301	5.017	5.258
FBgn0039792	CG2267		protein_coding	0.06924	0.5004	0.4235	0.312	0.066	0.067	0.036	0.032	0.047	0.014	0.067	0.107	0.049	0.016	0	0.03
FBgn0029942	CG2059	ABHD11	protein_coding	-0.05107	0.6677	-0.8931	5.13e-08	17.687	17.539	17.165	15.469	31.823	26.875	25.7	29.604	34.438	31.55	35.604	29.742
FBgn0001255	ImpE3		protein_coding	0.0856	0.4516	2.536	1.949e-14	2.551	3.503	5.153	5.154	0.964	0.988	1.252	0.936	0.469	0.698	0.883	0.728
FBgn0051680	CG31680		protein_coding	0.5599	0.07584	0.4892	0.4325	0.073	0.073	0	0	0.103	0.286	0.442	0.177	0	0	0	0
FBgn0260429	CG42524		protein_coding	0.149	0.2556	3.166	1.653e-10	0.667	0.595	0.476	0.976	0.09	0.125	0.254	0.155	0.035	0.136	0.05	0.064
FBgn0028427	Ilk	ILK	protein_coding	-0.03457	0.8012	0.3826	7.676e-08	40.525	45.255	48.487	45.54	32.756	32.833	31.01	34.756	33.106	33.894	35.105	35.192
FBgn0265598	Bx		protein_coding	-0.0331	0.8204	-0.4365	0.01566	13.429	12.135	9.834	10.485	15.133	14.082	13.515	14.986	17.768	16.169	15.864	14.648
FBgn0036814	CG14073		protein_coding	-0.01303	0.9605	-0.7123	3.086e-06	21.17	17.636	18.465	17.229	31.073	31.206	30.753	28.805	28.041	32.402	34.656	31.385
FBgn0266448	CG45078		protein_coding	0.04264	0.7251	5.112	4.086e-56	83.818	141.185	215.093	164.764	4.903	5.432	6.039	5.189	4.231	3.953	2.776	5.882
FBgn0038966	pinta		protein_coding	-0.0165	0.949	0.4241	0.000899	10.407	14.089	14.899	12.098	8.994	8.266	9.168	9.896	9.322	9.518	9.435	9.458
FBgn0031191	Cp110		protein_coding	-0.1638	0.1237	-0.951	5.481e-13	9.259	9.547	8.417	8.27	13.633	14.67	12.723	14.505	19.256	18.716	17.428	14.985
FBgn0263219	Dscam4		protein_coding	1.206	6.492e-09	1.668	6.387e-17	4.44	4.648	5.289	4.96	3.37	3.577	3.807	3.99	1.385	1.368	1.4	1.83
FBgn0011674	insc		protein_coding	-0.01637	0.9433	1.131	6.437e-08	14.145	14.532	17.261	19.482	5.795	6.285	7.465	6.87	6.469	6.729	6.525	8.527
FBgn0037841	CG4565		protein_coding	-0.04766	0.6821	0.5729	0.05766	2.208	2.772	2.504	2.17	0.531	0.871	1.615	0.968	1.184	1.197	1.674	1.453
FBgn0028398	Taf10		protein_coding	0.006071	1	0.3553	0.003316	41.517	49.618	40.353	47.534	35.921	33.954	34.047	35.976	38.51	32.981	32.15	34.451
FBgn0033459	CG12744		protein_coding	0.0712	0.5091	0.7794	1.896e-07	31.106	24.816	30.88	36.73	18.751	21.01	23.387	19.031	16.234	16.241	14.911	22.133
FBgn0033737	Nup54	NUP54	protein_coding	-0.0307	0.8373	-0.6156	1.197e-15	44.956	42.609	38.947	41.808	65.045	62.726	57.199	64.289	66.962	65.863	66.199	60.95
FBgn0262473	Tl		protein_coding	0.01343	0.9558	-0.7405	0.0004819	58.75	41.516	43.961	40.149	89.354	95.098	86.985	80.141	78.956	82.068	84.399	85.967
FBgn0032506	CG9395		protein_coding	0.05152	0.5802	-0.1175	0.8316	0	0	0	0	0.006	0.018	0.007	0	0	0.007	0	0
FBgn0050035	Tret1-1		protein_coding	0.006026	0.996	1.074	1.122e-05	14.354	18.274	24.432	19.277	7.949	10.374	6.906	9.189	8.437	7.58	8.079	9.273
FBgn0027341	Gfat1	GFPT2	protein_coding	6.232	1.571e-121	6.747	1.692e-143	11.641	9.448	11.548	9.878	4.907	11.258	7.236	6.041	0.082	0.079	0.145	0.08
FBgn0028708	Mst85C		protein_coding	-0.001871	1	-0.5039	1.433e-06	22.894	22.441	21.448	19.477	34.307	31.972	26.863	30.269	30.188	32.194	33.208	28.289
FBgn0259237	CG42335		protein_coding	0.003904	1	0.3279	0.4689	0.041	0	0.022	0.05	0	0.027	0.031	0.008	0.031	0	0	0.028
FBgn0038608	WRNexo		protein_coding	-0.06608	0.546	-1.063	6.625e-10	38.898	31.737	30.562	33.708	66.343	58.054	57.002	63.88	72.253	77.065	73.553	70.715
FBgn0031209	Ir21a		protein_coding	0.007497	0.9732	0.5292	0.3141	0.029	0.015	0.012	0.032	0	0.019	0.022	0	0	0	0	0.029
FBgn0036336	ste14	ICMT	protein_coding	-0.05543	0.6231	-0.7834	7.404e-10	20.566	18.553	17.571	18.448	32.553	29.272	26.901	29.374	32.676	34.074	35.904	29.901
FBgn0025878	wrapper		protein_coding	0.01056	0.9605	1.724	0.01121	0.271	0.196	0.423	0.643	0.096	0.089	0.177	0.024	0.072	0.083	0.076	0.078
FBgn0267454	CR45804		ncRNA	0.03927	0.73	0.2969	0.4305	0.302	0.262	0.245	0.562	0.244	0.454	0.132	0.631	0.322	0.277	0.068	0.203
FBgn0034258	eIF3c	EIF3C,EIF3CL	protein_coding	0.1288	0.1512	0.2193	0.03193	245.331	251.212	253.562	236.548	230.634	255.818	277.007	232.076	198.204	215.164	204.455	224.911
FBgn0034914	CG5554		protein_coding	-0.003888	1	-0.09931	0.1807	97.467	106.235	103.377	98.858	112.929	107.384	103.215	109.734	111.837	107.472	108.691	107.39
FBgn0023541	Cyp4d14		protein_coding	0.195	0.1886	2.383	5.215e-07	0.293	0.183	0.347	0.408	0.144	0.104	0.069	0.192	0.118	0.032	0.018	0.061
FBgn0037442	godzilla		protein_coding	-0.002861	1	0.2761	0.03929	36.245	40.689	49.417	44.539	34.102	35.286	35.446	33.619	33.995	35.506	35.791	34.1
FBgn0034996	CG13575		protein_coding	-0.01125	0.9494	2.221	0.03034	0.081	0.041	0.165	0.132	0	0	0	0.012	0	0.014	0	0.014
FBgn0030869	Socs16D		protein_coding	-0.04524	0.7132	-0.2434	0.01708	35.304	31.708	36.254	34.026	39.6	36.821	39.02	36.258	39.289	41.592	41.495	41.19
FBgn0260450	CalpC		protein_coding	-0.01954	0.9332	-0.4469	2.37e-05	9.961	12.478	13.073	10.759	17.522	15.21	12.87	15.987	16.151	16.94	17.609	13.186
FBgn0031315	CG14341		protein_coding	0.008352	0.986	0.3131	0.04635	23.616	21.575	20.715	26.012	19.047	19.415	16.731	19.102	17.94	17.984	19.117	17.527
FBgn0030752	CG9947	TMEM30A,TMEM30B	protein_coding	0.006148	0.9994	0.4227	1.667e-07	37.52	42.587	46.413	42.231	30.178	30.023	32.975	33.018	30.963	31.723	31.987	30.414
FBgn0011659	Mlh1	MLH1	protein_coding	-0.1276	0.244	-0.8278	7.455e-07	16.215	17.408	13.734	13.399	21.191	20.301	21.467	23.855	31.687	28.626	27.256	25.055
FBgn0037766	Teh1		protein_coding	-0.02293	0.8674	0.8463	0.075	0.042	0.043	0.055	0.067	0.024	0.006	0.019	0	0.013	0.03	0.007	0.023
FBgn0036565	CG5235	MOXD1	protein_coding	-0.2121	0.03649	-1.331	5.675e-35	15.881	13.495	14.088	13.304	33.966	30.058	23.298	27.19	33.318	35.833	42.224	32.89
FBgn0264379	CR43831		ncRNA	0	1	0	1	0	0	0	0	0	0	0	0	0	0	0	0
FBgn0004244	Rdl		protein_coding	0.03524	0.7206	3.627	0.001594	0.013	0.026	0.017	0.028	0	0.003	0.006	0.003	0	0.003	0	0
FBgn0037035	CG10589		protein_coding	0	1	0.2645	0.6317	0	0	0	0.02	0	0	0	0	0	0	0	0
FBgn0037759	CG8526	ASPG	protein_coding	-0.1006	0.3907	-0.3828	0.204	3.622	3.817	3.039	2.404	3.686	3.013	2.253	2.644	4.748	5.866	5.254	3.251
FBgn0039735	Nph		protein_coding	0.01376	0.9605	-0.00341	0.994	383.328	421.182	311.349	351.284	376.121	355.6	396.29	376.45	388.943	362.574	330.743	388.184
FBgn0284442	Mcm3	MCM3	protein_coding	-0.2223	0.09235	-0.7039	4.336e-05	61.187	81.983	53.258	61.151	75.153	68.102	65.139	104.488	137.608	104.115	100.401	97.097
FBgn0026149	BCL7-like	BCL7A	protein_coding	-0.03706	0.7943	-0.5649	3.005e-09	36.351	35.644	33.638	32.006	54.346	52.187	39.235	48.034	52.245	51.037	54.384	48.324
FBgn0036749	CG7460		protein_coding	-0.3755	0.0573	-0.09855	0.7155	2.274	1.722	1.486	2.113	1.257	1.558	1.107	0.803	2.505	1.649	1.494	2.63
FBgn0051807	CG31807		protein_coding	0.02755	0.8449	-0.06251	0.8692	0.856	1.26	1.544	0.731	1.403	1.994	1.482	1.35	1.101	1.332	1.167	1.149
FBgn0039407	CG14544	TRMT61A	protein_coding	0.08384	0.4268	0.3572	0.02189	24.214	29.263	22.631	24.122	19.226	21.514	26.135	25.482	20.298	18.573	17.654	19.934
FBgn0086676	spin	SPNS1,SPNS3,SPNS2	protein_coding	0.00403	1	-0.2616	0.1201	36.467	32.965	36.136	34.033	40.831	44.198	45.66	42.044	39.808	44.362	44.814	41.608
FBgn0034913	Snap29	SNAP29	protein_coding	-0.004733	1	0.08556	0.4053	44.512	43.475	43.065	45.082	41.747	40.356	39.782	42.512	40.669	41.673	42.203	41.138
FBgn0260962	pic	DDB1	protein_coding	0.04579	0.6897	0.09561	0.2639	86.695	77.8	82.751	81.667	80.794	86.148	82.723	77.203	74.134	78.584	78.191	76.433
FBgn0000274	Pka-C2		protein_coding	0.03407	0.8045	-0.1424	0.5727	1.02	1.033	1.401	1.639	1.283	1.677	2.44	1.415	1.182	1.011	1.813	1.808
FBgn0003520	stau		protein_coding	-0.04702	0.6995	-0.4821	1.151e-05	36.533	32.139	36.491	32.708	45.856	45.719	44.896	42.649	45.49	51.177	49.024	49.65
FBgn0036500	CG7275	DCAF13	protein_coding	0.07166	0.4549	0.06734	0.5128	28.977	32.578	32.136	31.206	31.203	34.364	34.239	32.097	30.837	29.042	28.599	30.551
FBgn0037632	CCT7	CCT7	protein_coding	0.03975	0.7725	-0.0699	0.6043	254.677	249.698	220.364	237.201	261.671	252.983	291.109	290.002	262.049	256.545	238.778	254.948
FBgn0010397	LamC		protein_coding	0.08352	0.4438	1.369	6.015e-11	48.566	53.032	57.855	57.69	22.561	22.97	33.711	24.756	19.235	19.647	18.043	24.05
FBgn0036577	CG13073		protein_coding	0.05035	0.5895	4.174	0.0002762	0.28	0.387	0.372	0.092	0.036	0.084	0	0.016	0	0	0.02	0.017
FBgn0030570	CG12540		protein_coding	-0.001832	1	5.915	1.174e-09	1.139	1.454	2.327	1.79	0	0	0	0.06	0	0	0.039	0.033
FBgn0026175	SkpC	SKP1	protein_coding	-0.006333	0.9897	7.505	1.885e-30	35.195	48.256	39.692	48.729	0.129	0.04	0.324	0.185	0.272	0.26	0.048	0.163
FBgn0285991	hpRNA:CR18854		ncRNA	-1.091	6.981e-07	0.517	0.007652	76.693	93.632	85.872	97.789	17.392	25.105	29.326	31.019	53.008	68.446	67.244	46.521
FBgn0000032	Acph-1		protein_coding	0.002624	1	-0.5099	4.243e-09	52.856	51.741	55.83	50.797	76.305	77.986	76.086	74.438	70.175	78.448	76.084	78.861
FBgn0010894	sinu		protein_coding	0.03761	0.7909	1.114	1.036e-13	23.107	25.104	34.606	25.965	11.655	13.742	15.702	12.831	11.363	11.305	12.034	14.124
FBgn0031049	Sec61gamma		protein_coding	0.01232	0.9643	0.09614	0.4924	165.013	143.12	138.809	148.302	140.026	136.066	159.137	134.853	135.954	137.728	136.71	144.134
FBgn0027556	CG4928	UNC93A	protein_coding	-0.02029	0.9079	5.393	2.531e-28	2.842	3.949	6.682	6.585	0.024	0.117	0.155	0.057	0.044	0.091	0.053	0.244
FBgn0035591	CG4611	PTCD1	protein_coding	0.08825	0.3595	0.04421	0.7413	13.743	13.054	12.456	12.885	14.436	14.904	15.772	13.102	12.528	12.508	12.344	13.088
FBgn0037282	CG14657		protein_coding	-0.003852	1	-0.06429	0.5431	18.535	17.576	21.458	20.127	20.382	20.018	20.484	20.02	19.359	20.829	20.633	20.584
FBgn0011509	SrpRbeta		protein_coding	0.04134	0.7487	-0.2937	0.000919	41.974	35.918	36.816	38.79	49.678	49.804	51.618	50.094	45.987	46.927	47.514	48.792
FBgn0250907	Cht10		protein_coding	-1.317	0.001926	-0.01732	0.9746	0.627	1.076	1.542	0.671	0.326	0.187	0.379	0.275	0.896	1.176	0.835	1.086
FBgn0035243	CG13926	HIKESHI	protein_coding	0.1135	0.2587	-0.1291	0.377	21.751	19.678	19.115	18.045	23.355	25.342	30.337	26.041	20.435	20.736	20.795	24.401
FBgn0261356	CG42633		protein_coding	0.0184	0.916	3.436	1.494e-07	0.951	0.516	0.165	1.031	0.144	0.067	0.026	0.062	0.126	0.048	0	0.046
FBgn0260855	Sec22	SEC22B	protein_coding	0.007912	0.9897	-0.06846	0.526	50.848	43.253	46.49	47.627	50.236	49.694	52.32	48.083	47.736	50.584	49.289	50.085
FBgn0043002	Chrac-14		protein_coding	-0.02312	0.9082	-0.7615	8.153e-08	47.858	44.666	36.888	43.044	80.855	73.45	60.432	69.297	73.593	79.375	79.415	69.085
FBgn0263979	Caf1-55	RBBP7	protein_coding	0.009135	0.9827	-0.4672	4.281e-07	97.072	92.129	81.1	97.277	141.753	136.617	116.214	126.259	125.974	123.665	134.028	129.465
FBgn0262867	Ptr		protein_coding	0.0363	0.7556	3.532	3.796e-06	3.807	2.834	4.452	4.77	0.263	0.452	0.704	0.633	0.339	0.224	0.208	0.405
FBgn0065099	snRNA:7SK		snRNA	-0.01564	0.9403	2.259	4.189e-07	5.339	9.33	4.046	8.839	1.401	0.906	0.722	1.678	1.09	1.351	2.448	0.636
FBgn0037546	mAChR-B		protein_coding	-0.1583	0.2334	0.1773	0.62	0.079	0.08	0.019	0.057	0.017	0.021	0.018	0.01	0.024	0.057	0.031	0.069
FBgn0005619	Hdc	HDC	protein_coding	0.003796	1	0.5946	0.2946	0.01	0.01	0.024	0.051	0.014	0.007	0.008	0.006	0.015	0.007	0.008	0
FBgn0035571	CG12493		protein_coding	0.05237	0.6173	4.644	1.089e-11	4.27	3.829	4.093	4.995	0.161	0.386	0.149	0.437	0.097	0.046	0.18	0.263
FBgn0042092	CG13773		protein_coding	0.01474	0.9532	-0.5876	3.347e-10	39.26	31.911	28.168	33.595	53.485	49.804	53.308	50.378	46.783	52.93	50.921	51.348
FBgn0023180	Orc6	ORC6	protein_coding	-0.1443	0.1821	-1.24	1.615e-16	15.892	15.932	11.696	11.999	27.878	25.729	24.697	26.708	33.954	33.754	36.097	30.243
FBgn0052039	CG32039		protein_coding	-0.0248	0.896	0.1645	0.2145	30.683	33.266	35.476	29.332	27.749	25.534	24.107	30.629	33.485	27.922	26.836	25.849
FBgn0024943	PIP82		protein_coding	0.08854	0.4235	0.284	0.4412	0.075	0.076	0.061	0.061	0.099	0.154	0.057	0.08	0.07	0.027	0.037	0.044
FBgn0268063	ltl		protein_coding	0.04519	0.6826	4.724	1.731e-15	0.382	0.528	1.048	0.424	0.013	0.073	0.035	0.017	0.028	0.007	0	0.044
FBgn0052369	CG32369		protein_coding	0.2527	0.09819	2.274	1.196e-22	5.84	6.049	9.457	9.369	1.7	2.281	3.14	2.583	1.385	1.475	1.341	2.091
FBgn0063449	Uhg2		ncRNA	0.07979	0.4542	0.5114	0.001401	54.386	57.38	47.684	51.846	31.819	42.591	56.737	42.62	35.883	31.373	29.474	46.568
FBgn0024985	CG11448		protein_coding	0.02158	0.9195	0.6458	7.231e-15	28.915	30.033	34.368	34.542	21.063	19.928	21.403	21.205	19.856	19.727	21.007	20.369
FBgn0040942	CG12643		protein_coding	0.04198	0.721	3.725	1.13e-13	2.596	3.83	5.108	4.155	0.525	0.293	0.396	0.452	0.055	0.212	0.264	0.573
FBgn0066101	LpR1		protein_coding	0.01179	0.9605	-0.0148	0.9737	4.153	4.73	7.452	4.942	5.761	5.918	5.723	5.7	4.882	5.514	5.695	5.481
FBgn0263659	CR43650		ncRNA	0.02088	0.8969	1.598	0.004301	0.772	0.759	0.828	0.967	0.226	0.244	0.277	0.365	0.211	0.173	0.154	0.299
FBgn0266449	Kr-h2	TMEM33	protein_coding	0.01103	0.9706	0.2573	0.0004976	69.237	72.774	79.617	76.515	59.461	60.8	66.524	65.47	60.954	61.536	61.737	64.395
FBgn0034940	CG16787		protein_coding	0.02725	0.8778	-0.276	0.01314	16.886	18.761	14.953	16.025	21.917	19.619	21.054	22.87	20.792	20.626	20.327	19.513
FBgn0052133	Ptip		protein_coding	-0.03618	0.8023	-0.4661	0.0002074	12.634	11.195	11.633	12.075	15.626	15.636	15.195	15.373	16.779	15.441	16.973	17.683
FBgn0010198	RpS15Aa	RPS15A	protein_coding	0.06692	0.5225	0.5464	6.659e-07	1049.1	1461.38	1151.16	1253.98	863.252	885.963	911.369	1064.44	948.405	793.985	743.265	827.847
FBgn0039642	CG11882		protein_coding	-0.01123	0.9682	0.109	0.6039	23.11	23.863	27.186	27.841	23.013	22.036	21.414	23.218	23.55	22.53	25.473	21.989
FBgn0037815	Rrp46	EXOSC5	protein_coding	0.09932	0.3246	0.8129	1.017e-09	37.908	40.89	32.867	38.875	21.231	24.398	28.386	26.268	20.965	18.981	17.992	25.36
FBgn0032919	CG9253	DDX47	protein_coding	0.03897	0.7721	-0.0195	0.9418	87.214	72.675	71.937	78.856	86.962	90.855	97.995	85.081	72.835	79.235	71.987	91.482
FBgn0031951	r2d2		protein_coding	-0.1303	0.1496	-0.2428	0.01886	31.886	28.125	27.3	28.932	29.331	29.803	27.815	29.862	34.492	34.471	35.594	33.858
FBgn0029689	CG6428	ASPG	protein_coding	-0.01025	0.9726	-0.4432	0.01993	13.274	11.748	12.074	11.366	16.031	15.72	17.53	16.873	15.699	17.693	18.09	17.284
FBgn0030854	CG8289		protein_coding	-0.02496	0.8903	-0.3069	0.0001165	37.63	35.631	37.836	33.806	47.959	43.992	40.227	41.79	44.209	46.085	46.146	43.66
FBgn0027515	CG7115	PPM1L	protein_coding	-0.03244	0.8304	-0.8308	1.145e-20	34.267	29.616	32.92	28.633	57.799	54.374	51.71	50.775	54.107	59.427	60.444	51.842
FBgn0260642	Antp		protein_coding	0.005973	0.9944	4.889	6.396e-59	1.008	1.609	2.055	2.142	0.05	0.06	0.078	0.047	0.057	0.058	0.016	0.089
FBgn0029094	asf1	ASF1B,ASF1A	protein_coding	-0.1066	0.2269	-0.6725	2.446e-13	69.432	74.009	60.696	66.239	101.541	89.014	79.192	108.694	116.588	110.828	111.651	97.117
FBgn0053303	CG33303	RPN1	protein_coding	0.00664	0.9961	-0.06957	0.573	63.44	56.837	60.876	61.637	63.22	62.271	66.583	66.525	62.053	64.913	63.147	65.236
FBgn0267431	Myo81F		protein_coding	0.05326	0.5918	2.949	0.0003488	0.07	0.036	0.086	0.093	0.004	0.023	0.022	0.021	0.009	0.008	0.009	0.004
FBgn0035371	AhcyL1	AHCYL1,AHCYL2	protein_coding	0.002035	1	0.5846	2.78e-07	66.05	60.073	83.266	76.013	46.107	46.083	52.382	43.25	41.648	47.627	47.192	50.549
FBgn0027615	CG6404	OXA1L	protein_coding	-0.001753	1	-0.6068	1.608e-11	41.835	36.114	33.091	38.489	58.047	56.926	54.352	60.232	56.449	60.461	58.993	54.331
FBgn0262353	CR43051		ncRNA	0.122	0.3201	2.576	7.282e-10	9.998	8.824	12.368	14.747	1.816	3.775	3.397	4.237	1.509	1.735	2.081	2.132
FBgn0260639	gammaTub23C	TUBG1	protein_coding	-0.1219	0.22	-0.4205	0.0007773	21.06	20.613	21.281	20.258	28.724	25.461	17.291	21.798	27.367	29.896	31.076	24.897
FBgn0028506	CG4455		protein_coding	0.07958	0.4085	0.09897	0.3772	31.579	27.263	32.152	30.658	31.131	33.178	30.735	33.019	27.879	27.201	24.899	33.285
FBgn0259878	Fs		protein_coding	0.01703	0.9352	0.9385	0.001342	5.809	6.306	7.872	6.411	3.44	3.903	3.142	2.942	2.711	3.079	3.672	2.523
FBgn0032033	CG13392		protein_coding	-0.03575	0.8052	-0.3494	0.001906	18.412	17.09	15.118	17.236	21.382	18.919	19.843	21.515	21.496	22.066	22.073	21.72
FBgn0033391	CG8026	SLC25A32,AC012213.5	protein_coding	-0.05207	0.6566	-0.2241	0.1215	65.876	52.355	61.549	60.715	66.585	61.702	61.128	62.847	68.927	74.669	71.893	68.729
FBgn0259113	DNApol-alpha180	POLA1	protein_coding	-0.03539	0.8095	-0.7829	5.061e-11	28.833	22.07	23.908	25.528	40.278	41.262	44.16	38.257	40.108	46.741	45.933	43.675
FBgn0025629	CG4045	METTL1	protein_coding	0.02181	0.9199	0.621	9.903e-09	36.495	46.601	38.426	43.747	24.728	26.251	30.554	28.731	28.352	25.411	24.241	27.677
FBgn0027343	fz3		protein_coding	0.003539	1	0.166	0.5551	4.432	4.56	4.28	4.968	3.548	3.648	4.346	4.417	4.049	3.417	3.8	4.333
FBgn0004198	ct		protein_coding	0.06868	0.5336	2.859	1.034e-08	4.539	4.586	6.804	7.587	0.792	1.342	1.502	1.53	0.648	0.718	0.5	1.214
FBgn0030092	fh		protein_coding	-0.02923	0.859	-0.3289	0.03241	15.178	15.536	12.865	15.474	18.875	17.217	16.814	17.029	19.844	18.77	19.381	17.67
FBgn0266486	CG45085		protein_coding	-0.05211	0.6564	-0.2246	0.1204	67.571	53.706	63.148	62.294	68.31	63.326	62.737	64.501	70.731	76.634	73.785	70.537
FBgn0039854	CG1635	ACOT9	protein_coding	0.03648	0.7965	-0.09471	0.3488	18.401	20.058	20.39	17.408	21.278	21.514	23.374	20.184	20.4	20.912	19.642	20.599
FBgn0053519	Unc-89		protein_coding	0.02027	0.9084	5.373	4.119e-28	6.686	10.265	16.012	12.774	0.226	0.377	0.343	0.291	0.238	0.237	0.13	0.403
FBgn0032474	DnaJ-H		protein_coding	-0.1409	0.1921	-0.4271	0.00458	36.711	39.149	36.955	35.027	42.435	38.293	37.561	41.018	54.439	51.381	52.006	45.921
FBgn0032922	CG9249		protein_coding	0.01057	0.9716	-0.1032	0.5935	9.837	11.742	9.569	8.668	10.36	10.691	10.887	12.658	11.203	10.397	9.98	11.499
FBgn0015838	Vang	VANGL2,VANGL1	protein_coding	-0.1117	0.2098	-0.1867	0.06522	28.906	27.606	32.076	29.957	29.413	30.403	29.375	27.496	32.414	34.051	34.614	34.497
FBgn0039152	Root		protein_coding	0.0476	0.6217	4.67	9.551e-07	0.067	0.162	0.209	0.09	0	0.01	0	0.028	0	0.004	0.004	0.007
FBgn0261808	cu	NOCT	protein_coding	-0.03848	0.7803	-0.472	0.006646	10.237	12.615	12.15	10.17	14.781	12.672	13.237	16.934	16.877	15.267	16.606	16.25
FBgn0038353	CG5399		protein_coding	0.07783	0.4717	2.68	4.873e-05	5.317	4.382	4.668	5.917	1.487	1.658	1.376	1.551	0.405	0.335	1.074	1.013
FBgn0263755	Su(var)3-9	SUV39H1	protein_coding	0.01313	0.9605	-0.2634	0.004906	23.556	22.668	19.383	20.34	26.828	26.325	27.338	25.4	25.122	25.363	26.525	26.664
FBgn0017418	ari-1	ARIH1	protein_coding	0.0353	0.8059	0.03351	0.7668	23.822	21.959	27.219	22.587	25.01	26.622	24.051	23.017	20.19	25.086	23.962	24.09
FBgn0086444	l(2)37Cb	DHX16	protein_coding	0.0003081	1	-0.1355	0.0537	13.329	13.136	13.374	13.091	14.854	14.922	13.883	14.582	14.937	15.019	14.432	13.853
FBgn0038597	CG8064	WDR3	protein_coding	0.3802	0.001015	0.7501	1.58e-12	31.421	31.856	30.164	31.125	21.245	25.715	28.119	24.647	17.443	18.04	16.008	21.284
FBgn0265843	CR44632		ncRNA	-0.04546	0.6735	0.2953	0.4273	0.148	0.1	0.02	0.232	0.052	0.049	0.056	0.015	0.037	0.07	0.117	0.099
FBgn0037980	DCAF12		protein_coding	-0.07507	0.4776	-0.7888	9.854e-09	14.895	12.347	11.936	13.069	21.911	21.544	17.938	18.005	22.591	23.06	24.481	22.791
FBgn0035756	unc-13-4A	BAIAP3	protein_coding	2.215	0.0004189	4.125	7.177e-14	0.171	0.079	0.474	0.088	0.055	0.083	0.067	0.048	0.004	0.01	0.023	0.007
FBgn0031008	CG8010		protein_coding	0.1871	0.0573	-0.2462	0.02491	53.102	60.147	47.896	46.999	70.878	75.68	81.762	79.814	70.569	59.037	56.747	62.243
FBgn0040384	CG32795	TMEM120B,TMEM120A	protein_coding	-0.1261	0.1824	-1.047	6.931e-22	20.225	19.66	20.55	19.481	35.493	30.927	34.011	40.068	43.959	42.021	40.881	41.035
FBgn0039566	CG4849	EFTUD2	protein_coding	0.1392	0.1008	0.09108	0.3578	35.407	34.674	35.29	35.408	35.053	40.506	41.773	37.887	30.91	33.551	33.569	33.878
FBgn0031040	CG14210		protein_coding	0.02901	0.86	0.04284	0.8153	51.114	66.642	46.327	50.401	50.986	54.17	57.444	61.759	57.804	48.869	45.745	55.061
FBgn0010173	RpA-70	RPA1	protein_coding	-0.1914	0.01035	-0.8439	2.069e-32	104.89	104.722	96.685	90.732	159.965	144.897	135.664	161.659	183.443	184.467	184.862	165.287
FBgn0030839	CG5613	ENGASE	protein_coding	0.06326	0.5617	0.2629	0.07943	6.997	9.163	7.747	8.223	8.675	7.107	6.752	7.969	7.198	6.662	6.363	6.157
FBgn0035811	CG12262		protein_coding	0.002072	1	0.1793	0.2284	197.559	234.146	222.577	218.473	180.212	189.515	187.541	210.181	201.355	200.668	176.355	185.007
FBgn0026361	Sep5	SEPT10	protein_coding	-0.2474	0.04883	-0.6026	2.267e-05	12.716	14.196	12.744	11.787	17.036	15.3	12.832	14.264	20.151	21.51	21.385	17.293
FBgn0035437	Strip	STRIP2,STRIP1	protein_coding	-0.05076	0.5931	-0.4614	3.147e-14	22.96	20.575	22.619	22.451	30.411	28.977	28.501	27.939	28.974	31.738	32.637	29.213
FBgn0051368	CG31368	AQR	protein_coding	0.1265	0.08366	0.2119	0.00377	21.306	18.898	20.499	21.257	20.32	21.009	21.438	17.927	16.482	17.53	18.365	18.205
FBgn0039829	CG15561		protein_coding	0.02154	0.9143	-0.2241	0.2712	18.315	13.204	14.227	16.649	18.77	21.645	22.418	18.275	17.812	19.116	17.957	19.822
FBgn0010220	Dbp45A	DDX49	protein_coding	0.2081	0.05757	0.1211	0.3696	29.397	27.588	26.673	28.796	30.605	34.993	35.658	30.797	25.901	25.296	23.035	28.626
FBgn0085188	CG34159		protein_coding	-0.0514	0.6549	-0.2568	0.01604	49.999	57.287	56.921	53.415	62.58	60.446	52.819	64.002	66.199	66.753	65.777	63.225
FBgn0001189	hfw		protein_coding	-0.0009167	1	0.3245	0.01606	16.248	15.216	19.077	16.421	13.602	13.461	12.543	12.967	12.794	12.81	13.318	13.767
FBgn0010803	TrpRS	WARS	protein_coding	0.003624	1	-0.1888	0.02228	54.524	56.566	50.228	51.696	62.329	56.019	61.33	65.048	61.468	61.253	61.646	59.128
FBgn0015270	Orc2	ORC2	protein_coding	-0.2085	0.07788	-1.407	2.132e-22	17.69	18.552	14.921	14.657	37.955	33.651	29.367	33.039	43.205	45.795	47.449	40.769
FBgn0037636	CG9821		protein_coding	-0.00396	1	-0.06458	0.794	134.802	138.424	179.673	148.89	159.101	163.133	154.041	147.666	145.7	158.825	160.969	169.43
FBgn0036020	CG8336		protein_coding	0.009437	0.9808	-0.1613	0.2348	25.451	23.394	22.276	25.437	29.394	29.107	26.902	25.703	26.121	27.935	26.873	27.812
FBgn0265297	pAbp		protein_coding	0.02223	0.9137	0.4556	0.005406	863.359	902.075	1132	1068.77	701.242	744.934	830.001	723.455	623.493	711.46	673.779	794.22
FBgn0028997	nmdyn-D7	NME7	protein_coding	-0.1186	0.2334	-0.7441	1.778e-09	17.304	15.909	13.485	13.025	23.157	21.523	19.297	20.556	25.018	27.292	26.811	23.11
FBgn0086451	l(2)k09022	HEATR1	protein_coding	0.07662	0.4784	0.01865	0.9393	31.831	28.337	28.186	27.663	34.873	37.453	35.539	32.05	27.556	27.85	30.12	28.812
FBgn0061196	CG15468		protein_coding	0.04524	0.678	0.7398	0.09116	0.35	0.194	0.336	0.622	0.293	0.272	0.364	0.155	0.119	0.159	0.101	0.214
FBgn0036740	Vps60	CHMP5	protein_coding	0.003966	1	0.7163	5.189e-16	71.777	85.068	80.706	77.913	46.514	43.391	49.765	51.306	48.486	48.644	45.842	46.797
FBgn0036897	CG8786		protein_coding	-0.06474	0.5036	-0.1962	0.02077	13.478	11.689	13.017	13.154	14.998	13.116	12.6	13.4	14.123	14.517	15.784	14.622
FBgn0037440	CRAT	CRAT	protein_coding	0.1241	0.1586	0.09073	0.3963	14.966	13.245	15.004	13.928	15.45	14.776	17.368	15.195	12.786	13.128	12.694	14.919
FBgn0033051	Strica		protein_coding	-0.07371	0.5091	0.1719	0.5468	3.767	4.199	5.102	4.491	2.774	2.587	2.635	2.465	3.832	3.61	2.975	4.483
FBgn0029866	CG3842		protein_coding	0.01936	0.9293	-1.921	1.265e-28	3.808	3.631	3.04	3.526	17.213	14.152	11.151	14.091	14.17	12.67	14.126	12.403
FBgn0000180	bib		protein_coding	0.03417	0.7945	2.824	1.613e-10	5.836	4.136	6.411	6.564	0.677	0.859	1.725	0.881	0.756	0.591	0.452	1.317
FBgn0000283	Cp190		protein_coding	0.006902	0.9942	-0.6257	1.269e-14	57.944	45.596	49.541	48.902	85.324	85.333	75.809	71.258	75.344	77.351	78.853	82.978
FBgn0024804	Dbp80		protein_coding	-0.148	0.2024	-0.2398	0.1989	25.781	26.399	33.541	28.911	26.072	26.037	27.053	23.588	33.059	33.252	37.734	34.351
FBgn0038202	CG12402		protein_coding	0.004286	1	4.454	2.865e-05	0.242	0.29	0.383	0.39	0	0.022	0.017	0.007	0	0.024	0	0.015
FBgn0030611	CG15027		protein_coding	0.1361	0.2123	0.5335	0.0006352	37.282	31.127	32.88	32.688	26.144	27.974	34.989	26.261	19.346	22.425	19.21	28.574
FBgn0029990	CG2233		protein_coding	0.8624	0.01204	3.117	4.136e-13	9.895	33.379	26.434	17.647	5.664	8.44	4.823	8.574	2.097	3.262	2.469	1.856
FBgn0015905	ast		protein_coding	-0.01532	0.9515	-0.4113	6.337e-07	16.492	15.853	16.069	14.186	21.733	21.042	20.399	18.779	20.125	21.341	22.308	20.015
FBgn0040308	Jafrac2	PRDX4	protein_coding	-0.06342	0.546	-0.2262	0.04444	26.704	24.875	24.903	23.851	26.915	24.363	26.885	27.774	29.933	29.398	28.079	30.728
FBgn0039111	PTPMT1	PTPMT1	protein_coding	0.03372	0.8217	0.1442	0.2593	19.977	19.648	21.695	23.083	22.207	20.075	20.595	18.574	19.197	20.429	19.112	17.308
FBgn0083990	sphinx		ncRNA	0.063	0.5379	0.5673	0.1846	0.062	0.094	0.176	0.179	0.022	0.183	0.236	0.075	0.046	0.044	0.098	0.042
FBgn0037298	CG2604	SCCPDH	protein_coding	-0.02098	0.9221	-0.04132	0.7844	60.748	86.071	63.149	62.496	64.192	63.416	62.299	78.213	81.37	70.021	63.472	65.947
FBgn0031419	CG15390		protein_coding	0.03831	0.7788	-0.2597	0.1851	8.849	8.168	7.135	6.396	10.13	11.499	10.945	10.2	8.552	9.247	9.458	10.225
FBgn0263199	Galk	GALK2	protein_coding	-0.01099	0.9718	0.4511	1.983e-05	20.893	28.322	26.601	21.739	16.042	16.333	18.597	18.054	19.762	17.392	16.471	16.838
FBgn0266895	CR45355		ncRNA	-0.04704	0.6143	0.5016	0.2844	0.286	0.435	0.232	0.104	0	0	0.109	0	0	0.102	0.226	0.096
FBgn0037021	CG11399	PCIF1	protein_coding	-0.02254	0.9143	-0.8423	1.027e-11	35.071	30.261	32.811	28.047	53.317	53.595	60.033	53.396	52.814	58.481	61.199	59.145
FBgn0051118	RabX4		protein_coding	-0.007918	0.9868	0.6986	0.0001211	5.346	5.988	7.678	6.87	3.438	4.171	3.477	3.65	3.861	3.486	3.838	3.989
FBgn0036483	CG12316		protein_coding	-0.0384	0.7869	-0.5842	6.353e-07	25.6	18.748	19.029	19.369	30.937	27.997	29.339	28.67	29.944	31.28	33.813	31.34
FBgn0000057	adp	WDTC1	protein_coding	0.006827	0.9943	-0.318	0.0001114	22.313	21.36	21.849	21.461	28.365	27.647	26.183	27.886	27.928	28.355	27.045	25.696
FBgn0000084	AnxB10		protein_coding	-0.02805	0.8507	0.7186	0.006516	58.532	80.007	75.589	73.826	32.096	32.088	34.693	32.936	41.765	38.776	37.387	37.162
FBgn0283450	Glo1	GLO1	protein_coding	0.04639	0.704	0.2193	0.04579	116.563	143.623	120.892	139.456	121.242	115.828	117.18	127.893	130.235	109.127	95.031	109.827
FBgn0025525	bab2		protein_coding	0.02639	0.8647	4.861	4.744e-72	2.28	3.489	5.198	4.122	0.121	0.151	0.209	0.113	0.072	0.122	0.094	0.214
FBgn0058006	CG40006		protein_coding	-1.027	0.0008659	-1.78	1.193e-09	6.628	6.024	6.243	5.741	8.457	10.355	8.729	9.223	21.021	22.092	22.92	21.342
FBgn0267390	dop		protein_coding	0.02086	0.9212	-0.1241	0.1558	25.269	23.594	27.098	26.63	28.497	30.108	28.685	28.18	26.38	28.936	28.833	27.922
FBgn0086917	spok		protein_coding	0.0691	0.4784	3.036	0.004885	0	0.066	0.245	0.156	0.046	0.057	0	0.04	0	0	0	0.029
FBgn0026430	Grip84	TUBGCP2	protein_coding	-0.002647	1	-0.5641	6.803e-18	40.288	35.688	36.418	34.298	56.66	51.738	54.609	54.369	52.125	57.372	56.008	52.572
FBgn0005638	slbo		protein_coding	0.3596	0.08066	2.277	5.548e-08	2.319	1.584	1.545	2.153	0.427	0.893	1.349	0.719	0.337	0.46	0.238	0.47
FBgn0024733	RpL10	RPL10,RPL10L	protein_coding	0.01501	0.9515	0.3277	0.005065	2084.83	2717.62	2250	2331.94	1747.76	1802.19	1863.39	2210.08	2201.43	1787.25	1615.72	1788.55
FBgn0039744	CG15526		protein_coding	0.009033	0.9605	2.688	0.01529	0.068	0	0.109	0.439	0	0	0	0.041	0	0	0	0
FBgn0034618	CG9485	AGL	protein_coding	-0.0039	1	-1.17	3.162e-09	19.455	16.181	15.434	14.033	39.104	35.305	39.214	37.64	37.727	38.586	39.532	37.709
FBgn0020503	CLIP-190		protein_coding	-0.03165	0.8373	0.6921	2.128e-11	22.192	27.566	35.098	31.118	15.606	16.239	18.902	15.989	15.31	18.195	18.515	18.65
FBgn0052187	CG32187		protein_coding	-0.1606	0.2373	-0.6926	0.05929	0.202	0.409	0.35	0.146	0	0.114	0.681	0.281	0.709	0.576	0.501	0.561
FBgn0040348	CG3703	RUNDC1	protein_coding	0.001941	1	2.869	1.009e-14	0.506	0.667	0.943	0.565	0.054	0.07	0.128	0.112	0.114	0.076	0.109	0.062
FBgn0052865	alphagamma-element:CR3286		ncRNA	3.165	0.002324	3.908	4.645e-05	0.197	0.314	0.593	0.53	0.239	0.296	0.215	0.618	0	0.04	0.022	0.019
FBgn0041096	rols		protein_coding	0.09121	0.4254	2.288	2.055e-11	3.795	4.012	4.542	5.552	1.049	1.384	1.704	1.26	0.757	0.747	0.739	1.339
FBgn0023395	Chd3		protein_coding	-0.1345	0.1876	-1.2	5.184e-20	26.176	21.012	19.186	18.759	48.52	40.587	34.122	37.855	46.363	51.876	55.82	45.277
FBgn0028480	CG17841		protein_coding	-0.01496	0.9515	0.02975	0.8087	42.676	51.6	49.962	47.2	45.825	46.38	44.133	46.247	47.085	47.474	46.579	46.25
FBgn0263343	CR43424		ncRNA	0.03053	0.7709	0.6411	0.2784	0.05	0.025	0.041	0.018	0.035	0.016	0.019	0.031	0.037	0	0	0
FBgn0031745	rau		protein_coding	0.04572	0.6881	2.558	2.771e-06	10.975	11.539	14.436	17.901	2.587	3.524	4.111	3.316	1.858	1.828	1.877	3.147
FBgn0284221	Sema5c		protein_coding	0.5989	0.0005675	2.503	1.961e-59	21.223	27.864	36.493	32.957	6.586	9.274	8.624	8.931	4.942	5.081	5.013	5.785
FBgn0028554	x16	SRSF3	protein_coding	-0.06541	0.4863	-0.7144	2.661e-21	83.23	85.035	73.306	77.593	129.751	121.186	105.039	129.494	139.955	140.039	130.496	117.522
FBgn0029856	CG11700	UBB	protein_coding	0.0379	0.7748	1.036	1.039e-05	2.667	2.587	3.002	2.597	1.449	1.31	1.583	1.47	1.108	1.502	0.931	1.338
FBgn0036929	CG7668		protein_coding	-0.009367	0.9797	-0.2425	0.1504	52.969	48.238	56.313	47.395	65.084	61.07	56.538	57.08	62.593	59.949	63.608	60.621
FBgn0030345	CG1847	AIPL1,AIP	protein_coding	-0.02033	0.9266	-0.1255	0.2961	21.701	24.35	24.104	22.487	24.332	25.12	24.163	23.964	25.253	25.598	25.622	25.009
FBgn0053094	Synd	PACSIN1,PACSIN2,PACSIN3	protein_coding	0.2296	0.005055	0.02363	0.8122	51.331	46.899	54.037	51.569	62.614	61.332	60.22	61.586	48.333	49.428	50.906	51.816
FBgn0037880	CG17726	NDUFAF7	protein_coding	0.01555	0.9515	-0.1998	0.1079	17.774	19.426	17.412	17.83	20.805	20.104	21.979	23.663	23.201	20.498	21.044	19.078
FBgn0010926	l(3)07882	NOP14	protein_coding	0.01898	0.9352	-0.3646	0.005796	27.602	24.144	23.496	23.852	33.598	35.876	35.993	30.087	31.221	33.207	32.581	32.647
FBgn0030658	CG7872	DNAJC25	protein_coding	0.03277	0.8301	-0.05676	0.7218	60.833	62.581	47.41	68.869	65.227	68.531	69.176	67.087	62.67	64.939	64.756	57.669
FBgn0033131	CR12842		pseudogene	-0.04682	0.647	2.551	8.852e-05	0.794	0.804	0.99	0.927	0	0.04	0.14	0.074	0.091	0.087	0.193	0.164
FBgn0031604	Elp3	ELP3	protein_coding	-0.07796	0.3045	-0.3097	6.486e-07	39.774	40.024	34.767	34.032	41.065	42.525	41.831	44.153	47.474	47.474	46.225	43.327
FBgn0263198	Acn		protein_coding	0.07424	0.2883	-0.09349	0.1028	48.081	42.116	45.427	47.685	54.094	54.765	52.926	49.032	45.499	48.715	49.798	51.747
FBgn0003162	Pu	GCH1	protein_coding	-0.02367	0.8842	2.563	5.381e-12	6.947	5.001	7.24	7.975	1.005	0.888	1.232	0.649	1.098	1.115	1.137	1.133
FBgn0085430	CG34401	ZSWIM8	protein_coding	-0.01009	0.9726	-0.08674	0.6996	20.048	17.869	19.203	19.694	18.717	19.344	21.107	19.991	19.504	21.705	21	20.196
FBgn0053054	CG33054	OARD1	protein_coding	-0.01531	0.9513	0.4399	0.008994	11.475	12.221	13.344	11.513	8.256	7.446	8.405	8.885	8.767	9.702	7.266	8.901
FBgn0035763	CG8602	MFSD1	protein_coding	0.07796	0.4373	1.623	1.921e-47	212.091	218.417	264.006	261.462	80.908	89.34	89.009	93.475	70.08	76.861	79.106	82.596
FBgn0027592	MED15	MED15	protein_coding	-0.02147	0.921	-0.4507	0.0003216	27.658	25.541	26.088	27.872	38.655	37.314	32.876	33.289	36.693	37.657	38.35	36.381
FBgn0000667	Actn	ACTN1	protein_coding	-0.02007	0.9258	0.02521	0.8034	39.453	38.561	48.191	48.287	40.872	40.381	43.048	42.299	40.266	45.109	43.609	42.47
FBgn0264075	tgo		protein_coding	0.02546	0.889	0.0851	0.3699	36.279	34.704	42.567	41.199	37.023	40.079	38.479	35.763	34.211	37.425	37.812	36.264
FBgn0030151	CG1354	OLA1	protein_coding	0.08809	0.3096	-0.0009007	1	128.681	133.058	124.054	125.773	141.698	138.457	151.408	142.726	126.279	129.322	126.552	129.7
FBgn0039356	CG5039		protein_coding	-0.05616	0.6123	0.4763	1.768e-05	15.315	15.454	14.949	15.26	9.215	9.473	10.575	9.715	10.931	10.317	11.213	10.748
FBgn0264753	Rgk1		protein_coding	0.02721	0.8399	5.115	4.61e-18	0.761	0.759	1.057	1.234	0.031	0.057	0.037	0.013	0.016	0.016	0.013	0.051
FBgn0000239	bur	GMPS	protein_coding	-0.008861	0.9746	-0.4269	1.725e-18	79.647	71.877	78.434	75.552	104.96	104.321	100.171	98.735	97.078	104.931	106.594	103.19
FBgn0037722	CG8319		protein_coding	-0.03601	0.8033	-0.731	5.646e-11	19.339	18.834	20.595	19.122	33.621	30.452	28.143	30.762	30.52	34.643	34.952	31.661
FBgn0030283	CG15198		protein_coding	0	1	0	1	0	0	0	0	0	0	0	0	0	0	0	0
FBgn0037073	Tsr1	TSR1	protein_coding	0.08256	0.4195	-0.09626	0.5015	72.759	57.188	63.182	62.545	78.038	84.25	89.971	68.374	61.216	66.339	69.691	77.238
FBgn0035415	CG14966		protein_coding	-0.005778	0.9999	0.1494	0.4764	23.97	20.908	24.327	22.082	18.889	19.44	21.192	19.634	20.18	19.792	20.113	20.863
FBgn0036032	CG16711		protein_coding	-0.05417	0.6294	-0.6434	8.111e-09	14.146	12.189	13.419	11.437	18.944	18.917	18.639	17.154	19.256	20.944	21.055	20.132
FBgn0267703	CR46036		ncRNA	0.02973	0.8087	0.6025	0.1716	0.236	0.137	0.328	0.366	0.215	0.244	0.051	0.226	0.126	0.168	0.107	0.045
FBgn0033257	sand		protein_coding	-0.03544	0.7843	0.3711	0.2541	1.604	2.231	2.224	3.046	0.547	0.788	2.239	0.812	1.353	1.268	1.756	1.597
FBgn0037363	Atg17		protein_coding	0.01902	0.9352	-0.3	0.01446	30.513	28.611	33.723	26.524	38.614	38.733	41.83	35.617	34.66	38.245	39.853	35.89
FBgn0034368	CG5482		protein_coding	0.0211	0.922	0.383	8.97e-05	59.222	56.584	64.967	65.932	48.667	48.753	49.537	47.428	44.809	45.777	49.278	47.642
FBgn0005593	RpL7	RPL7,RPL7L1	protein_coding	0.1018	0.3045	0.4505	0.0003116	1671.78	1895.39	1783.22	1880.65	1446.87	1541.9	1620.25	1586.07	1278.17	1304.18	1215.36	1401.66
FBgn0004959	phm		protein_coding	0.03276	0.8033	3.545	5.247e-15	7.567	12.056	9.168	12.169	0.884	1.13	1.283	1.141	1.034	0.644	0.658	1.002
FBgn0030269	CDK2AP1		protein_coding	0.003587	1	-0.4442	1.713e-11	25.288	22.92	26.036	26.476	36.938	36.322	31.027	34.117	35.163	35.866	35.884	30.974
FBgn0025865	Cortactin		protein_coding	0.028	0.8699	0.4358	0.0008023	53.294	47.027	55.074	58.942	41.911	43.344	42.784	37.86	36.088	40.385	37.898	41.204
FBgn0034391	CG15080		protein_coding	0.01425	0.9433	2.557	0.0002329	1.482	0.81	0.771	1.111	0.122	0.154	0.252	0.235	0.113	0.148	0.071	0.278
FBgn0052062	Rbfox1		protein_coding	0.03857	0.7851	0.9317	4.336e-15	9.581	11.64	13.028	12.11	6.105	6.713	6.637	6.316	5.681	6.003	5.879	6.235
FBgn0262954	Rpb12	POLR2K	protein_coding	-0.001274	1	-0.0343	0.8424	82.752	88.727	74.588	83.618	87.027	86.44	73.204	90.294	81.715	82.512	80.919	92.95
FBgn0030467	CG1764		protein_coding	-0.08327	0.4133	0.06051	0.6845	7.69	8.265	9.71	9.176	7.49	7.201	6.498	7.364	8.719	8.411	8.872	7.385
FBgn0284231	CG46315		protein_coding	-0.02351	0.9019	0.8934	1.295e-07	33.433	29.515	40.282	42.854	18.069	16.96	18.435	16.356	17.283	19.159	18.4	20.397
FBgn0011741	Arp6	ACTR6	protein_coding	-0.07637	0.3548	0.09663	0.2046	34.034	40.21	34.034	37.076	30.014	30.415	31.209	32.426	35.959	33.852	31.809	34.079
FBgn0038129	TBC1D5		protein_coding	0.001976	1	0.06364	0.7343	18.128	19.074	18.468	17.944	16.765	19.312	17.344	17.105	17.567	17.083	18.484	16.979
FBgn0262512	Vha14-1	ATP6V1F	protein_coding	-0.005804	1	0.2286	0.02554	145.338	162.792	160.003	175.515	142.56	135.131	119.141	143.759	131.79	143.231	142.361	128.837
FBgn0036372	Abp1		protein_coding	0.01909	0.9347	-0.5708	1.037e-05	40.269	37.322	38.323	34.857	63.605	61.67	57.124	57.089	54.832	60.075	59.835	54.305
FBgn0028494	CG6424		protein_coding	-0.02307	0.9058	0.9056	9.412e-08	31.113	27.418	37.514	40.058	16.713	15.699	17.044	15.124	15.957	17.702	17.003	18.848
FBgn0030968	CG7322	DCXR	protein_coding	-0.09071	0.4268	-0.6649	0.01788	4.313	6.071	6.864	5.395	6.036	5.409	8.39	7.674	10.206	9.687	10.967	10.434
FBgn0040228	DCTN5-p25	DCTN5	protein_coding	-0.03938	0.7767	0.2011	0.1586	22.784	29.912	22.617	23.7	18.337	19.075	16.682	23.538	24.029	20.286	20.268	20.609
FBgn0052982	CG32982		protein_coding	0.05485	0.6245	2.973	1.915e-15	2.211	2.876	4.161	2.887	0.274	0.503	0.894	0.447	0.398	0.336	0.215	0.549
FBgn0030930	GalNAc-T2		protein_coding	0.05001	0.6083	-0.4518	7.286e-13	24.871	22.091	23.705	23.516	35.02	34.981	31.532	35.425	32.489	33.533	33.15	30.245
FBgn0002733	E(spl)mbeta-HLH		protein_coding	0.12	0.3251	2.243	3.231e-08	10.634	14.686	13.904	11.247	4.756	3.958	4.736	4.357	2.213	2.119	2.346	3.596
FBgn0052436	CG32436		protein_coding	0.003144	1	0.8005	0.01293	0.438	0.53	0.693	0.572	0.19	0.325	0.259	0.314	0.3	0.171	0.218	0.37
FBgn0038260	CG14855		protein_coding	0.06341	0.5683	4.602	7.538e-39	4.477	5.377	6.782	7.158	0.343	0.42	0.34	0.271	0.26	0.276	0.184	0.221
FBgn0036988	CG5262	TMEM104	protein_coding	-0.009375	0.981	0.3228	0.008684	20.838	19.539	26.405	24.117	17	17.284	19.03	17.087	16.206	16.876	19.65	19.107
FBgn0038921	CG6332		protein_coding	-0.03484	0.7608	1.518	0.009378	0.116	0.324	0.33	0.252	0.041	0.038	0	0.053	0.087	0.062	0.046	0.059
FBgn0012051	CalpA	CAPN9	protein_coding	0.1046	0.2456	1.079	2.309e-29	18.262	23.601	26.798	21.5	12.94	12.465	12.119	11.276	9.321	10.663	11.314	10.882
FBgn0037950	HisCl1		protein_coding	2.457	0.008037	4.042	0.0001882	0.041	0.124	0.182	0.103	0.058	0.067	0.14	0.099	0	0.015	0	0
FBgn0036557	mRpS31	MRPS31	protein_coding	0.08765	0.3009	0.2396	0.003491	44.971	45.324	40.315	46.51	36.975	42.002	47.726	40.148	40.628	35.217	34.995	38.541
FBgn0019972	Drice	CASP3,CASP7	protein_coding	-0.01143	0.9699	-0.06396	0.6884	43.393	45.245	45.781	43.457	46.409	47.06	40.805	47.061	44.582	46.152	50.503	45.326
FBgn0040078	pont	RUVBL1	protein_coding	0.03571	0.8001	0.0832	0.3724	96.589	93.019	82.509	86.412	87.861	88.478	89.156	90.24	86.988	83.395	82.704	84.729
FBgn0024989	CG3777		protein_coding	0.03289	0.7951	1.881	0.001257	1.187	0.727	1.263	1.671	0.201	0.501	0.446	0.475	0.244	0.215	0.154	0.464
FBgn0261285	Ppcs		protein_coding	-0.02033	0.9266	-0.2212	0.04274	11.256	9.665	11.314	10.964	11.572	12.154	12.96	12.165	12.089	12.739	12.724	13.147
FBgn0267991	CR46258		ncRNA	0.09126	0.4137	2.188	9.376e-18	3.118	4.095	3.977	4.066	1.028	1.163	1.316	1.052	0.643	0.661	1.165	0.849
FBgn0016687	Nurf-38	PPA1,PPA2	protein_coding	-0.009267	0.9823	0.06306	0.5871	192.283	256.524	193.929	215.746	191.29	185.479	193.507	236.615	227.015	198.198	193.505	201.577
FBgn0001226	Hsp27		protein_coding	-0.01612	0.9428	-0.1318	0.6167	306.604	339.731	267.546	254.803	351.16	284.195	233.44	335.53	338.459	337.31	319.287	318.658
FBgn0264816	koko	CCNQ	protein_coding	0.03172	0.837	-0.7109	1.602e-13	36.214	29.302	28.509	31.124	56.868	55.547	52.271	54.228	49.466	53.065	54.602	50.497
FBgn0034046	tun		protein_coding	0.1728	0.03005	-0.7673	3.593e-22	12.693	13.313	13.513	11.632	25.941	26.026	25.056	27.476	22.042	21.924	22.708	21.2
FBgn0051477	ATPsynepsilonL		protein_coding	0.01935	0.9063	7.539	9.766e-31	17.323	29.313	31.861	28.427	0.11	0.256	0.119	0.143	0.058	0.167	0.123	0.105
FBgn0031337	CG14346		protein_coding	0.055	0.6115	6.061	1.166e-31	8.786	9.222	8.483	6.496	0.199	0.185	0.153	0.22	0.12	0.086	0.158	0.081
FBgn0037899	RpL24-like		protein_coding	-0.004203	1	-0.07309	0.7159	238.855	355.549	256.983	266.51	278.615	284.836	279.083	324.3	361.044	278.967	265.154	278.228
FBgn0040784	karr		protein_coding	-0.02488	0.8206	4.818	4.781e-05	1.805	2.326	2.526	2.788	0	0.054	0	0	0.122	0	0.065	0
FBgn0039075	CG4393		protein_coding	0.06889	0.5351	2.975	2.399e-12	3.411	4.033	6.199	4.371	0.583	0.873	0.978	0.996	0.394	0.453	0.78	0.583
FBgn0000152	Axs		protein_coding	-0.02848	0.8664	0.2332	0.04739	11.24	15.321	18.237	12.343	11.363	10.405	11.155	12.668	12.673	11.862	12.383	11.326
FBgn0034433	EndoB		protein_coding	-0.04338	0.7366	-0.7502	1.007e-10	16.797	14.429	14.309	13.961	24.785	23.615	21.392	23.943	24.2	25.915	27.661	24.333
FBgn0250848	26-29-p		protein_coding	-0.05066	0.6664	-1.023	2.426e-21	507.447	420.015	430.154	416.457	858.134	817.985	831.043	836.633	872.712	913.794	979.226	899.259
FBgn0260746	Ect3	GLB1L3,GLB1,GLB1L,GLB1L2	protein_coding	0.02107	0.889	0.4403	0.2815	14.62	20.102	21.057	18.948	7.015	13.365	20.703	12.766	8.953	8.855	6.455	12.975
FBgn0038424	CG17565	CHURC1-FNTB,FNTB	protein_coding	-0.04986	0.673	-0.2573	0.01488	32.898	37.013	29.021	35.653	38.074	38.078	33.422	39.205	46.352	40.083	39.74	35.835
FBgn0032515	loqs		protein_coding	-0.05288	0.6415	-0.08509	0.4857	19.301	22.637	23.036	21.941	21.823	21.073	18.994	22.276	24.82	23.568	23.352	20.741
FBgn0031143	CG1532	GLOD4	protein_coding	-0.02969	0.8511	0.06878	0.7226	67.777	89.051	71.776	75.624	68.745	63.426	60.6	70.827	81.095	67.364	73.289	66.74
FBgn0265996	CR44771		ncRNA	0	1	0.2597	0.6445	0.062	0	0	0	0	0	0	0	0	0	0	0
FBgn0033033	scaf		protein_coding	-0.7865	0.003437	2.117	1.582e-18	2.529	3.377	3.239	4.119	0.312	0.319	0.471	0.41	0.568	0.607	1.125	0.734
FBgn0263831	Gen		protein_coding	0.01346	0.9605	-0.2364	0.0218	9.201	9.095	9.471	8.73	11.802	12.009	10.01	10.448	9.371	11.902	11.863	10.132
FBgn0266019	rudhira		protein_coding	0.07314	0.5033	0.6593	0.0004316	33	33.428	41.178	35.549	23.576	26.756	30.935	25.391	20.048	22.365	22.01	21.474
FBgn0032487	Ski6	EXOSC4	protein_coding	0.0304	0.8479	0.4853	0.001292	35.66	47.13	32.493	36.239	25.304	26.494	28.776	33.689	32.718	23.794	23.571	25.15
FBgn0023477	Taldo	TALDO1	protein_coding	0.07178	0.5071	0.5595	0.0004078	208.372	279.575	206.256	266.521	182.879	165.311	180.02	223.918	195.296	143.399	144.211	147.165
FBgn0038429	CG14882		protein_coding	-0.05833	0.5937	-0.8604	7.206e-14	20.447	15.031	15.311	14.686	27.875	26.983	25.844	27.995	29.888	30.164	31.004	30.138
FBgn0004463	RpIII128	POLR3B	protein_coding	0.1423	0.05235	0.3126	1.582e-05	20.2	18.831	19.443	18.412	15.841	18.531	19.846	17.086	14.584	14.956	15.807	16.282
FBgn0262987	CG43295		protein_coding	-0.06464	0.558	-0.5078	0.03082	7.51	7.989	6.576	8.445	9.068	9.525	8.902	8.639	11.017	13.257	11.024	11.665
FBgn0052707	APC4		protein_coding	-0.08023	0.376	-0.6626	1.597e-14	14.552	14.986	12.937	13.655	21.153	20.476	19.37	19.466	22.643	23.323	24.357	19.444
FBgn0261456	hpo	STK3	protein_coding	-0.02704	0.8793	-0.2391	0.03688	35.671	33.137	37.052	36.154	42.966	39.898	38.775	38.744	41.241	43.068	44.679	39.967
FBgn0004635	rho		protein_coding	0.1129	0.3359	2.482	1.582e-16	1.44	1.291	1.786	1.796	0.234	0.411	0.505	0.536	0.285	0.336	0.181	0.308
FBgn0265540	CR44390		ncRNA	0.01532	0.949	0.4839	0.03142	0.802	1.028	0.946	0.725	0.492	0.52	0.647	0.848	0.633	0.522	0.568	0.61
FBgn0039902	Zip102B	SLC39A9	protein_coding	-0.04691	0.7022	0.2375	0.05172	23.89	27.332	32.166	29.118	21.366	21.667	21.668	21.577	23.517	23.017	23.261	24.822
FBgn0035917	Zasp66		protein_coding	0.01352	0.9433	4.812	1.999e-07	35.162	56.448	90.934	63.266	1.77	2.708	2.538	1.631	1.549	1.445	1.042	2.337
FBgn0259932	CG42455		protein_coding	0.08428	0.3048	-0.08909	0.2761	92.284	95.162	81.956	93.907	108.021	105.816	105.244	109.015	102.8	96.987	93.456	93.663
FBgn0051357	CG31357	MAEA	protein_coding	0.03518	0.8111	0.383	0.001827	36.756	41.364	46.252	41.564	33.413	34.644	36.204	30.831	30.22	31.572	33.859	29.782
FBgn0034925	CG5339	METTL9	protein_coding	-0.02189	0.9188	-0.37	1.77e-05	53.51	51.902	44.876	49.186	64.912	58.789	56.973	70.318	73.268	63.679	64.241	58.29
FBgn0029969	CG10932	ACAT1	protein_coding	-0.04669	0.7055	-0.5907	3.586e-05	60.977	73.176	57.462	65.823	86.779	78.743	81.541	108.793	124.648	95.486	93.266	85.456
FBgn0085468	ND-MWFE		protein_coding	0.05506	0.5981	0.3689	1.122e-05	40.183	43.853	43.528	51.281	38.482	37.702	35.83	36.855	33.907	33.282	32.664	37.872
FBgn0033504	CAP		protein_coding	0.005332	1	3.33	2.488e-29	4.063	5.163	8.157	6.694	0.58	0.677	0.678	0.489	0.472	0.549	0.534	0.793
FBgn0031403	CG15387	C12orf57	protein_coding	-0.02836	0.867	-0.3481	0.004092	28.635	26.76	23.69	23.57	34.262	30.829	29.596	29.968	32.543	33.018	34.77	31.861
FBgn0039282	Bili		protein_coding	-0.008697	0.9726	1.973	0.000919	0.097	0.081	0.165	0.051	0.025	0.006	0.02	0.022	0.013	0.019	0.021	0.03
FBgn0037529	mRpS9	MRPS9	protein_coding	0.08551	0.3048	0.2134	0.006846	66.001	67.849	66.887	73.209	65.756	65.801	67.031	63.023	56.114	60.281	56.981	62.15
FBgn0032512	Bdp1		protein_coding	-0.03529	0.8045	-0.2497	0.006396	18.451	18.238	19.584	17.92	22.513	21.779	20.698	19.046	19.444	23.469	24.88	20.904
FBgn0013718	nuf		protein_coding	-0.009547	0.9736	-0.1407	0.5737	30.532	28.258	35.256	28.542	34.222	34.579	31.779	31.34	32.634	35.234	35.242	35.317
FBgn0033661	CG13185	MDN1	protein_coding	0.1239	0.2913	0.8291	0.0002878	20.862	17.325	18.075	17.854	11.264	13.905	17.362	12.058	8.399	8.478	8.457	12.949
FBgn0058160	CG40160		protein_coding	0.02632	0.8756	0.1621	0.4381	12.73	13.771	20.101	14.749	15.354	16.684	14.884	12.555	12.314	13.029	14.437	14.072
FBgn0026088	CG14818		protein_coding	-0.06535	0.543	0.6509	2.851e-07	31.143	39.027	42.417	42.928	21.722	21.526	21.803	19.753	25.49	24.413	24.546	22.444
FBgn0004432	Cyp1		protein_coding	0.01303	0.9607	0.0562	0.6965	1238.25	1382.08	1284.88	1374.7	1284.44	1187.28	1300.69	1440.13	1278.26	1287.06	1225.15	1276.04
FBgn0034491	Hsl		protein_coding	-0.05571	0.6165	-0.3039	0.008465	28.554	25.214	28.635	26.856	32.534	32.634	28.717	29.081	33.052	35.289	36.005	31.934
FBgn0000246	c(3)G		protein_coding	0.4688	0.003568	0.7764	1.328e-07	31.385	23.518	27.335	28.374	20.542	29.293	25.598	18.403	14.373	15.965	13.093	18.994
FBgn0267035	CR45479		ncRNA	0.01003	0.9706	1.413	2.107e-06	0.66	0.505	0.535	0.675	0.228	0.222	0.123	0.304	0.24	0.218	0.153	0.216
FBgn0038609	Nup43		protein_coding	-0.06404	0.548	-0.4825	5.798e-05	33.657	39.834	29.748	31.289	42.764	39.165	41.306	45.912	49.92	46.887	48.995	45.263
FBgn0026239	gukh		protein_coding	-0.04364	0.7276	0.01947	0.942	11.591	12.642	14.661	13.232	10.597	11.576	11.329	10.76	11.806	12.798	13.633	13.089
FBgn0263251	vnc	NAA10	protein_coding	0.0842	0.3066	-0.08884	0.279	86.042	88.696	76.41	87.649	100.702	98.737	98.136	101.625	95.836	90.417	87.151	87.337
FBgn0040071	tara		protein_coding	-0.01224	0.9605	1.509	7.522e-11	6.308	8.612	9.417	9.752	2.222	2.661	3.414	2.657	2.716	2.679	2.836	3.342
FBgn0004861	ph-p		protein_coding	0.1705	0.1625	2.044	1.042e-26	2.876	3.367	3.963	3.969	1.009	1.39	1.442	0.882	0.773	0.859	0.649	1.13
FBgn0265823	CR44612		ncRNA	0.1323	0.2709	1.859	0.006571	0.103	0.183	0.042	0.196	0.009	0.042	0.217	0.071	0.019	0.009	0.02	0.052
FBgn0035397	CG11486	PAN3	protein_coding	0.009842	0.9765	-0.105	0.5192	45.172	44.034	55.231	51.706	56.292	56.076	50.901	54.71	49.766	54.713	53.52	54.281
FBgn0266711	EloC	ELOC	protein_coding	0.06353	0.549	0.5236	3.569e-06	108.799	117.271	115.852	130.624	88.158	91.16	88.602	95.089	79.505	81.942	78.673	83.421
FBgn0261985	Ptpmeg		protein_coding	0.03731	0.7944	-0.244	0.05868	32.667	29.83	31.602	32.649	41.207	42.462	39.247	41.312	36.646	37.785	39.515	37.702
FBgn0260799	p120ctn		protein_coding	-0.004305	1	-0.4	0.002869	67.014	55.009	68.308	58.93	90.274	88.331	72.708	80.167	77.345	83.482	92.328	81.822
FBgn0031694	Cyp4ac2		protein_coding	0.005188	0.993	1.726	0.0218	0.134	0.113	0.091	0.049	0.047	0	0	0.027	0.017	0.016	0.018	0.015
FBgn0038277	RpS5b	RPS5	protein_coding	0.02082	0.9097	0.01181	0.986	1077.12	1261.24	975.886	1135.53	1230.95	1185.31	1189.71	1445.83	1104.16	1132.27	1054.6	1107.62
FBgn0259735	CG42389		protein_coding	-0.04848	0.678	-0.1594	0.1053	15.036	14.574	18.015	16.081	15.756	16.241	18.238	16.01	16.809	18.487	17.868	18.262
FBgn0005696	DNApol-alpha73	POLA2	protein_coding	-0.1268	0.2199	-1.069	6.721e-15	28.87	28.577	22.01	24.441	48.771	44.089	38.793	48.549	58.839	58.637	58.198	47.843
FBgn0037881	GCC88	GCC1	protein_coding	0.02896	0.8449	-0.24	0.0003374	27.186	24.276	23.812	25.888	32.621	30.785	30.94	29.65	30.83	30.432	30.312	28.228
FBgn0039306	RIOK2	RIOK2	protein_coding	-0.001902	1	-0.2241	0.05172	36.641	41.147	37.486	37.85	43.012	44.498	47.319	44.664	47.323	45.729	44.06	43.049
FBgn0086613	Ino80	INO80	protein_coding	0.0254	0.8814	-0.4114	1.425e-09	16.824	15.285	15.503	15.667	22.973	23.135	21.221	19.903	19.927	22.367	22.109	20.15
FBgn0033089	CG17266	PPIH	protein_coding	-0.005378	1	0.1254	0.4245	29.645	38.545	29.031	31.93	28.115	24.83	25.989	36.873	33.242	26.912	28.865	28.501
FBgn0052767	CG32767		protein_coding	0.01187	0.9673	-0.1843	0.1949	19.423	17.903	20.267	17.237	21.641	22.687	22.087	21.896	20.836	21.981	20.595	22.386
FBgn0030731	Mfe2	HSD17B4	protein_coding	0.03509	0.8111	1.172	1.558e-18	23.005	34.539	33.454	29.055	12.9	13.267	14	16.438	15.585	11.755	12.588	12.235
FBgn0005596	yem		protein_coding	-0.0577	0.601	-1.35	2.009e-28	30.811	25.39	24.231	22.78	63.84	57.473	56.521	59.928	61.935	70.957	71.445	62.135
FBgn0086346	ALiX		protein_coding	0.03768	0.7916	0.5081	0.0001114	62.045	68.863	81.006	71.522	50.345	53.85	56.806	51.605	46.592	50.348	51.171	46.971
FBgn0035245	GC	GGCX	protein_coding	0.007573	0.9739	1.862	0.01899	0.028	0.014	0.035	0.113	0.03	0.009	0	0	0	0.02	0	0.01
FBgn0052745	CR32745		pseudogene	-0.02631	0.8509	2.55	2.746e-07	0.974	1.644	1.907	1.584	0.172	0.107	0.247	0.198	0.181	0.232	0.128	0.436
FBgn0032130	CG3838		protein_coding	-0.05734	0.5939	-0.04906	0.682	17.824	17.331	17.164	17.932	16.886	17.579	15.929	15.839	15.971	19.05	19.245	18.515
FBgn0020762	Atet		protein_coding	0.6339	0.00775	2.953	9.744e-37	30.652	35.452	41.626	45.815	5.698	9.26	13.544	6.962	3.931	4.452	5.033	6.193
FBgn0004872	piwi	PIWIL3,PIWIL1,PIWIL4	protein_coding	0.01856	0.9295	0.3055	0.1623	87.692	85.141	102.524	95.496	75.945	75.395	82.802	78.371	66.829	67.466	68.153	85.435
FBgn0039274	CG11920	IMP4	protein_coding	0.0231	0.9097	-0.2717	0.03948	34.305	33.015	35.077	31.652	42.862	47.512	41.685	40.492	39.365	38.699	41.981	43.712
FBgn0035978	UGP	UGP2	protein_coding	-0.0481	0.6818	-0.5888	1.054e-10	50.265	49.689	47.487	43.718	68.85	63.8	68.893	68.287	70.654	73.245	73.649	73.153
FBgn0016122	Acer	AC113554.1	protein_coding	0.06065	0.5833	0.007384	0.9906	33.13	55.966	44.12	32.322	35.575	47.07	63.76	52.79	42.953	40.448	32.962	48.177
FBgn0264346	CR43802		ncRNA	0	1	0	1	0	0	0	0	0	0	0	0	0	0	0	0
FBgn0052115	CG32115		protein_coding	0.03278	0.7902	1.761	0.00543	0.441	0.347	0.258	0.531	0.087	0.113	0.075	0.284	0.11	0.087	0.097	0.049
FBgn0011828	Pxn		protein_coding	0.02573	0.8693	7.041	2.389e-116	71.692	119.409	197.278	155.537	0.79	1.498	1.502	0.813	0.808	0.911	0.441	1.776
FBgn0036892	Lon	LONP1	protein_coding	0.07175	0.4629	0.09376	0.3696	30.356	25.889	29.848	29.71	31.242	31.891	29.962	27.393	25.333	26.757	27.634	28.561
FBgn0037057	CG10512		protein_coding	0.06333	0.568	2.464	1.784e-17	5.893	8.248	12.835	10.159	1.548	2.404	2.86	2.033	1.582	1.697	1.261	2.091
FBgn0029157	ssh		protein_coding	-0.02581	0.8878	-0.7074	5.875e-15	41.272	34.277	35.44	34.327	59.504	54.979	59.527	56.435	56.296	63.515	60.948	59.404
FBgn0027868	Nup107	NUP107	protein_coding	-0.008479	0.9862	0.04769	0.6824	55.12	64.383	53.52	58.482	52.402	52.963	53.169	61.864	61.712	56.744	52.238	52.984
FBgn0015031	cype		protein_coding	0.0392	0.7778	0.5934	1.067e-07	203.406	236.89	193.213	243.075	149.927	149.122	158.502	158.34	142.595	139.078	136.514	152.912
FBgn0033551	CG7222	DESI2	protein_coding	0.003192	1	-0.164	0.102	44.249	42.115	45.632	42.321	53.864	51.269	42.678	49.286	45.33	52.184	51.33	47.245
FBgn0035528	CG15012		protein_coding	-0.03687	0.7909	0.5604	7.178e-12	84.624	95.028	102.242	85.587	54.338	57.944	66.11	55.927	61.73	62.205	60.073	62.988
FBgn0036263	thoc6		protein_coding	-0.06162	0.5146	-0.2182	0.003864	18.16	19.471	16.606	17.766	19.944	19.1	18.114	20.58	21.443	21.347	20.401	20.77
FBgn0036514	CG12301	UTP14A,UTP14C	protein_coding	0.02723	0.8731	-0.5191	0.001189	26.042	20.674	22.49	22.594	35.925	40.135	38.574	32.688	30.842	35.123	33.965	36.046
FBgn0052137	CG32137		protein_coding	0.0157	0.9352	0.3106	0.4105	8.707	7.736	8.842	9.861	6.788	7.058	7.656	6.227	5.045	5.289	5.434	5.99
FBgn0040929	CG12659		protein_coding	-0.03991	0.7701	-0.4767	0.001914	14.679	12.142	12.238	13.233	19.437	16.915	15.314	15.643	18.464	18.78	21.062	16.562
FBgn0036124	CG7839		protein_coding	0.01237	0.963	-0.3049	0.04177	47.469	34.91	38.649	40.117	51.151	54.776	57.066	46.496	46.347	52.709	49.967	53.574
FBgn0267702	CR46035		ncRNA	-0.02665	0.8509	1.073	0.01073	0.669	0.616	1.198	0.776	0.215	0.253	0.201	0.21	0.257	0.434	0.272	0.218
FBgn0034853	Ice1		protein_coding	-0.03512	0.8033	-0.9951	6.214e-34	19.484	16.017	16.14	15.948	34.07	32.259	32.138	30.811	31.971	35.069	36.052	32.889
FBgn0035907	GstO1		protein_coding	-0.003054	1	-0.5235	6.569e-08	47.052	44.113	41.464	37.517	62.42	58.515	61.9	63.088	64.89	63.092	61.466	57.78
FBgn0003964	usp		protein_coding	0.0006396	1	-0.4286	1.043e-05	46.617	43.66	42.222	42.576	61.848	56.176	58.899	61.333	59.088	61.196	61.155	56.562
FBgn0033639	CG9003		protein_coding	-0.005798	0.999	-0.1734	0.4393	17.966	17.009	22.038	17.426	20.995	20.233	21.928	20.612	19.292	22.041	21.856	22.74
FBgn0036710	CG6479		protein_coding	-0.336	0.001269	-1.256	1.262e-37	20.962	19.143	18.011	17.265	40.7	35.257	28.365	32.807	44.267	46.45	47.481	43.43
FBgn0037313	CG1161		protein_coding	-0.01493	0.9517	0.4685	1.323e-05	56.412	73.25	62.351	65.854	43.931	42.269	40.401	52.062	54.289	43.908	43.066	42.638
FBgn0031089	CG9572		protein_coding	0.003404	1	3.894	3.687e-11	0.803	1.184	1.635	1.227	0.097	0.09	0.07	0.056	0.068	0.082	0.036	0.108
FBgn0015609	CadN		protein_coding	0.1202	0.3099	1.351	8.452e-07	1.368	1.436	1.797	1.81	0.629	0.911	1.176	0.763	0.471	0.443	0.396	1.033
FBgn0033117	CG3358	TATDN1	protein_coding	0.01684	0.947	0.03604	0.8027	29.303	29.083	25.549	28.036	28.947	29.015	27.735	27.194	25.947	29.061	27.248	26.762
FBgn0027085	LeuRS-m	LARS2	protein_coding	-0.0711	0.4533	-0.6901	4.904e-16	18.142	17.832	16.155	16.83	27.24	25.035	23.548	26.05	29.626	28.78	29.125	24.883
FBgn0037513	pyd3	UPB1	protein_coding	-0.01912	0.921	4.413	1.703e-39	17.586	27.934	40.057	32.775	1.192	1.293	1.07	1.146	1.506	1.783	0.732	1.339
FBgn0051313	CG31313		protein_coding	0.00808	0.981	4.952	4.48e-38	13.018	28.707	28.085	22.689	0.614	0.729	0.882	0.822	0.898	0.481	0.685	0.777
FBgn0086779	step	CYTH1	protein_coding	-0.05745	0.5981	-0.7358	1.035e-11	24.737	20.492	22.745	20.283	36.312	33.071	32.781	32.901	35.815	39.435	38.389	35.952
FBgn0265605	Ric	RIT2	protein_coding	-0.05512	0.607	-0.3666	7.306e-05	28.32	28.371	32.618	29.115	37.633	33.733	34.148	36.051	36.283	40.114	40.194	37.347
FBgn0001108	DCTN1-p150	DCTN1	protein_coding	-0.005797	1	-0.408	4.732e-06	44.067	37.847	39.996	38.766	52.208	52.169	56.723	51.872	51.024	56.415	54.909	52.572
FBgn0083027	snoRNA:Psi18S-531		snoRNA	0.1978	0.1466	1.33	2.544e-09	57.352	45.338	36.071	55.276	22.951	28.111	28.558	29.716	20.607	12.739	12.912	27.194
FBgn0083992	Mkp		protein_coding	-0.05303	0.5822	0.1788	0.008935	28.601	27.68	30.602	30.293	23.366	24.831	25.325	23.649	23.423	26.37	26.692	26.887
FBgn0260648	Rrp40	EXOSC3	protein_coding	0.1118	0.2696	0.6943	1.667e-07	37.975	48.817	34.641	39.111	25.626	26.695	30.518	34.8	28.807	21.85	20.97	24.952
FBgn0000588	esc	EED	protein_coding	-0.1219	0.2474	-0.9439	4.282e-10	27.128	25.06	23.868	25.497	42.612	42.333	35.442	40.143	48.261	53.008	54.206	46.692
FBgn0260458	PGRP-LD		protein_coding	0.04567	0.7061	0.1419	0.1643	19.451	22.699	22.795	23.699	21.999	20.307	21.484	22.377	19.775	19.774	20.733	19.809
FBgn0260780	wisp		protein_coding	-0.002993	1	-0.9675	2.208e-07	101.566	85.792	81.632	81.724	180.14	173.121	183.807	177.587	169.851	181.811	177.765	193.143
FBgn0033274	CG14757	SDHAF2,AP003108.2	protein_coding	0.5248	0.02305	1.126	6.848e-06	2.794	3.143	2.305	2.618	2.488	1.837	1.932	2.111	1.04	1.07	1.43	1.042
FBgn0037171	CG14459		protein_coding	0.009127	0.9605	0.2535	0.6597	0	0.006	0	0	0.004	0	0	0	0	0	0	0
FBgn0243512	puc		protein_coding	0.02706	0.8785	0.9177	1.038e-12	25.755	26.469	35.108	30.226	14.907	16.336	17.64	15.735	13.829	15.197	16.473	15.205
FBgn0031144	CG1529		protein_coding	-0.0877	0.3414	-0.5973	8.371e-10	15.595	12.762	13.847	13.359	19.886	18.847	17.466	18.663	20.528	23.004	22.279	19.338
FBgn0022702	Cht2		protein_coding	-0.4474	0.0146	-1.876	1.239e-22	8.332	10.208	6.638	6.768	21.764	12.021	16.6	24.892	31.831	28.385	32.759	25.251
FBgn0010340	140up	TIMMDC1	protein_coding	-0.02435	0.901	-0.01821	0.8938	16.186	14.421	15.514	15.869	14.513	14.746	16.436	14.532	14.712	16.25	15.249	16.602
FBgn0039266	CG11791		protein_coding	0.2488	0.04181	1.837	1.844e-41	21.978	23.232	33.935	29.133	9.993	11.123	8.822	10.433	6.902	6.826	7.236	9.213
FBgn0037110	ORMDL	ORMDL2	protein_coding	-0.02599	0.8813	0.008985	0.9815	37.44	43.311	36.721	37.93	37.274	32.481	34.277	37.653	37.348	38.319	42.022	36.606
FBgn0034051	Mlf		protein_coding	-0.01864	0.9319	-0.2531	0.0001215	65.776	61.839	58.628	57.776	75.857	70.405	65.821	73.021	73.918	73.409	74.667	69.547
FBgn0010611	Hmgs	HMGCS2,HMGCS1	protein_coding	0.05778	0.5705	0.8281	1.661e-24	74.185	78.996	88.561	90.725	48.474	49.316	51.45	51.655	42.993	46.631	47.232	48.565
FBgn0262647	Nup160	NUP160	protein_coding	0.02316	0.9084	-0.3049	0.0007315	30.164	28.121	28.77	28.255	36.05	38.504	37.541	36.501	33.346	36.424	36.569	36.994
FBgn0003149	Prm		protein_coding	0.0315	0.8023	4.819	5.783e-13	43.253	61.571	93.107	76.659	2.388	3.689	3.666	3.021	2.095	1.991	1.342	2.905
FBgn0031284	PGAP2	PGAP2	protein_coding	-0.04467	0.7205	-0.6898	1.641e-11	14.205	11.812	13.204	13.133	21.2	20.419	17.416	20.411	21.949	20.544	23.142	20.183
FBgn0003950	unc		protein_coding	-0.029	0.8449	0.05824	0.8354	1.497	1.995	1.81	1.788	1.399	1.511	1.452	1.468	1.527	1.622	1.733	1.855
FBgn0052354	CG32354		protein_coding	0.03341	0.792	5.919	1.156e-22	7.245	14.076	20.238	16.263	0.166	0.286	0.484	0.294	0.184	0.151	0.158	0.324
FBgn0058263	MFS17		protein_coding	-0.239	0.09957	-0.6634	0.0009479	15.727	13.674	16.316	14.29	17.896	15.785	18.245	15.886	23.961	24.037	28.014	25.191
FBgn0013811	Dhc62B		protein_coding	0.04242	0.7261	3.075	1.371e-22	0.256	0.211	0.19	0.251	0.022	0.042	0.043	0.031	0.026	0.011	0.03	0.038
FBgn0001180	hb		protein_coding	-0.003399	1	-0.564	0.07766	22.582	17.202	19.054	18.356	36.055	31.8	34.732	31.594	34.245	32.044	36.769	35.328
FBgn0266623	CR45130		ncRNA	0.009737	0.9687	2.088	6.61e-05	0.411	0.384	0.589	0.457	0.067	0.083	0.096	0.192	0.188	0.09	0.1	0.021
FBgn0004363	porin	VDAC3,VDAC1,VDAC2	protein_coding	-0.0219	0.9192	0.06784	0.5537	396.019	465.491	340.886	370.286	344.678	341.989	354.603	400.179	433.009	360.34	336.224	368.05
FBgn0035481	CG12605		protein_coding	0.004243	1	4.742	6.029e-07	0.27	0.444	0.376	0.291	0.011	0.013	0.008	0.009	0.011	0.007	0.008	0.01
FBgn0052791	DIP-alpha		protein_coding	0.06187	0.5761	0.479	0.005943	0.945	0.746	0.855	0.978	0.626	0.705	0.833	0.744	0.656	0.498	0.501	0.78
FBgn0036180	Duba		protein_coding	-0.04647	0.6746	-0.3097	2.032e-05	25.738	24.813	28.699	26.955	33.87	31.02	28.964	30.865	31.834	34.205	34.748	31.47
FBgn0031268	cold		protein_coding	-0.09214	0.3445	-0.07021	0.6073	44.772	56.568	60.721	46.302	50.653	44.126	39.901	52.838	57.787	55.039	56.948	49.596
FBgn0028546	ics	RSU1	protein_coding	-0.08315	0.3884	0.3611	0.0005768	29.689	29.769	37.809	34.475	23.422	23.613	21.333	20.803	25.061	24.669	26.434	25.465
FBgn0032013	Scgalpha		protein_coding	0.01534	0.9413	4.07	1.666e-16	1.777	3.224	5.085	3.936	0.147	0.288	0.264	0.225	0.223	0.165	0.109	0.279
FBgn0011284	RpS4	RPS4X,RPS4Y1,RPS4Y2	protein_coding	0.2197	0.03066	0.6035	1.037e-08	1537.09	1527.66	1571.15	1760.14	1226.07	1356.08	1410.56	1243.23	942.301	1041.71	984.705	1176.57
FBgn0038118	timeout	TIMELESS	protein_coding	-0.001776	1	-0.7802	9.419e-06	10.967	9.632	8.921	10.151	18.313	18.528	17.257	17.012	17.235	18.871	18.471	16.972
FBgn0001257	ImpL2		protein_coding	0.04395	0.7074	0.3235	0.3148	33.016	22.747	22.66	28.374	22.166	26.228	30.804	26.329	18.097	16.781	14.854	24.249
FBgn0016126	CaMKI	CAMK1D	protein_coding	-0.07459	0.479	-0.1256	0.4031	29.733	31.045	40.281	34.715	31.753	31.117	33.983	30.855	33.78	37.021	40.748	37.577
FBgn0030932	Ggt-1		protein_coding	-0.01628	0.9386	-0.6102	0.03116	144.896	145.893	139.909	128.165	221.332	196.24	212.626	246.615	267.069	249.445	247.219	217.96
FBgn0038235	CG8461	RRP36	protein_coding	0.0333	0.8251	-0.3826	0.002501	15.762	11.838	14.699	13.459	20.918	20.295	19.763	18.326	18.382	19.118	17.303	19.016
FBgn0045823	vsg		protein_coding	0.002659	1	1.223	8.566e-23	228.651	269.934	387.437	304.526	115.81	127.63	141.257	119.609	113.814	125.143	127.05	135.26
FBgn0031422	PIG-Wa		protein_coding	0.007713	0.9917	-0.1909	0.06275	8.118	7.027	7.946	8.367	9.437	8.434	9.327	9.435	9.231	8.476	9.647	8.822
FBgn0037526	ArgRS-m	RARS2	protein_coding	0.002653	1	-0.5016	4.521e-08	8.167	7.129	7.744	7.151	10.333	10.637	11.694	10.692	10.746	11.026	10.109	11.267
FBgn0038536	CG7655	NRM	protein_coding	-0.03624	0.8021	1.003	1.581e-17	19.373	26.871	19.841	24.018	10.393	10.429	9.665	10.35	10.753	10.82	10.132	12.322
FBgn0036168	CG7512		protein_coding	0.05405	0.6302	2.261	7.715e-13	4.433	5.062	4.192	6.465	1.16	1.592	1.428	1.296	0.96	1.059	0.524	1.573
FBgn0000039	nAChRalpha2		protein_coding	0.04687	0.6142	5.285	2.383e-06	0.112	0.178	0.182	0.116	0.011	0	0.024	0	0	0	0	0
FBgn0031460	CG15399		protein_coding	0.01044	0.9515	3.809	0.0008624	0.046	0.188	0.226	0.134	0	0.031	0	0	0	0	0	0
FBgn0005683	pie		protein_coding	-0.1583	0.1495	-1.292	1.686e-18	17.003	13.714	12.04	11.748	29.282	25.712	23.625	27.25	33.819	35.928	35.052	31.389
FBgn0052076	Alg10	ALG10,ALG10B	protein_coding	-0.03977	0.7561	-0.1656	0.0383	28.907	27.954	25.972	27.837	30.262	28.718	28.181	30.835	31.045	32.302	31.735	29.334
FBgn0035955	CG5194		protein_coding	-0.01474	0.9482	-1.279	0.0001377	24.116	28.28	23.823	21.628	70.146	56.411	51.932	62.547	65.701	69.54	70.157	63.158
FBgn0026576	CG5991	PISD	protein_coding	-0.06748	0.5266	-0.7393	1.95e-08	43.562	41.211	36.055	36.715	60.404	58.369	54.373	61.506	66.276	70.068	68.304	65.341
FBgn0039544	CG12877		protein_coding	-0.00506	1	-0.7855	2.119e-17	25.035	19.834	21.035	21.404	40.306	39.999	36.762	34.122	34.538	39.775	39.727	38.408
FBgn0266525	CG45092		protein_coding	0.01022	0.9745	0.2152	0.1243	24.735	20.502	24.385	27.516	21.743	21.702	21.175	20.277	18.63	22.029	21.642	20.517
FBgn0033095	CG3409		protein_coding	0.01022	0.9745	0.2152	0.1243	24.735	20.502	24.385	27.516	21.743	21.702	21.175	20.277	18.63	22.029	21.642	20.517
FBgn0032479	CG16974		protein_coding	-0.01499	0.9515	-0.4192	0.0001473	50.18	41.166	42.973	44.331	59.687	58.685	60.501	56.113	56.879	61.15	64.028	59.898
FBgn0029507	Tsp42Ed		protein_coding	0.02788	0.8535	5.092	1.759e-77	22.089	35.241	54.382	35.898	0.823	1.329	1.961	0.821	0.958	0.809	0.677	1.749
FBgn0037379	CG10979		protein_coding	-0.05701	0.5853	-0.7136	5.499e-16	29.505	24.01	26.064	23.024	41.887	38.095	38.492	37.952	40.525	44.426	44.612	40.621
FBgn0010097	gammaTub37C		protein_coding	-0.01507	0.9515	-0.6858	7.006e-08	53.453	47.871	39.69	40.93	69.684	68.595	72.386	78.758	81.928	71.765	69.719	76.249
FBgn0034641	mahj	DCAF1	protein_coding	-0.01761	0.943	-0.4858	3.763e-07	34.959	29.677	30.234	32.797	45.061	44.359	45.155	40.873	42.132	46.229	46.473	45.897
FBgn0051342	CG31342		protein_coding	-0.05812	0.5468	-0.7739	2.913e-27	46.082	37.235	41.001	39.173	69.935	63.822	65.395	62.836	63.785	73.226	75.354	69.365
FBgn0265767	zyd	SLC24A5,SLC24A3,SLC24A4	protein_coding	-0.1565	0.2433	-1.349	0.002882	9.013	8.872	8.039	8.632	14.484	11.918	12.771	10.596	26.062	26.716	29.038	28.426
FBgn0036714	CG7692		protein_coding	0.8089	5.768e-12	0.208	0.07525	15.013	12.504	14.731	13.733	20.436	21.581	22.857	21.061	10.757	12.057	12.561	12.752
FBgn0061469	Ube3a	UBE3A	protein_coding	-0.008314	0.9872	-0.3894	0.0002167	26.662	23.288	25.428	24.975	33.182	34.931	31.258	31.483	30.894	35.282	35.102	31.614
FBgn0038191	CG9925		protein_coding	-0.001127	1	-0.1953	0.4799	41.863	43.299	43.015	39.133	51.503	51.922	49.38	46.667	44.653	51.521	53.979	50.761
FBgn0036617	Cpr72Ea		protein_coding	0	1	0	1	0	0	0	0	0	0	0	0	0	0	0	0
FBgn0038508	CG5866		protein_coding	-0.01439	0.9403	3.467	8.087e-07	1.454	1.091	1.527	1.362	0.038	0.106	0.123	0.066	0.16	0.115	0.128	0.036
FBgn0038772	mdlc	RNF113A,RNF113B	protein_coding	-0.06586	0.5265	-0.9265	8.591e-18	34.301	28.32	25.147	24.658	53.762	50.322	45.291	44.613	54.181	56.159	55.921	50.968
FBgn0266180	CR44886		ncRNA	0.1074	0.3549	0.1299	0.6561	3.411	3.817	3.49	4.152	4.444	5.074	4.787	5.465	2.406	2.561	3.969	4.219
FBgn0036826	arx		protein_coding	-0.04179	0.7547	-0.1618	0.1704	26.361	25.217	23.753	25.345	27.77	26.149	25.083	25.736	26.72	28.037	28.164	30.25
FBgn0267124	CR45564		ncRNA	0.01454	0.9428	2.24	0.0004775	1.632	0.944	1.322	1.461	0.22	0.102	0.414	0.473	0.289	0.277	0.245	0.157
FBgn0027106	Inx7		protein_coding	0.1264	0.3083	4.28	4.919e-27	41.698	50.704	46.388	75.15	3.161	4.999	5.741	4.446	2.492	2.186	1.959	3.865
FBgn0013305	Nmda1		protein_coding	0.03038	0.8479	0.8497	3.85e-23	54.355	63.723	72.799	63.844	37.192	35.819	36.343	37.063	33.885	35.717	34.788	35.398
FBgn0030913	CG6123		protein_coding	0.0252	0.8195	5.611	3.249e-07	0.067	0.087	0.104	0.027	0	0.004	0	0.004	0	0	0	0
FBgn0036570	IntS9	INTS9	protein_coding	0.1333	0.08938	0.02503	0.8015	17.333	15.725	16.651	16.399	18.324	20.32	19.361	17.221	15.156	16.773	15.679	17.309
FBgn0034271	Vps50	VPS50	protein_coding	-0.06139	0.5487	-0.6482	1.199e-12	19.232	15.197	17.022	15.977	26.618	25.221	24.709	20.976	25.273	27.008	28.738	25.908
FBgn0030514	CG9941	MGRN1,RNF157	protein_coding	-0.04871	0.6746	-0.5138	1.204e-08	30.362	27	28.966	28.543	42.471	37.98	35.656	37.702	40.751	38.994	47.024	38.919
FBgn0261564	Reep1		protein_coding	0.007429	0.9923	0.3431	0.0002354	22.734	28.318	33.158	26.377	22.175	22.605	21.694	21.132	21.146	21.765	22.869	20.771
FBgn0265640	CR44447		ncRNA	0	1	0.2832	0.5848	0	0	0	0.046	0	0	0	0	0	0	0	0
FBgn0036770	Prestin	SLC26A2,SLC26A1	protein_coding	-0.006897	0.9918	0.08463	0.7531	29.389	25.563	32.153	26.557	26.023	25.686	25.353	24.724	23.779	26.72	27.484	27.56
FBgn0039305	CG11858	PIN4	protein_coding	-0.002978	1	0.1283	0.312	49.092	50.495	42.16	47.707	42.018	42.061	43.197	44.062	41.644	44.974	39.321	46.401
FBgn0266005	CR44779		ncRNA	0.2672	0.07605	0.8525	1.011e-05	2.716	2.709	2.809	2.756	1.552	2.248	2.914	1.832	1.385	1.138	1.232	1.977
FBgn0259986	nab		protein_coding	0.06013	0.526	1.655	0.0409	0	0.063	0.025	0.011	0	0	0.059	0	0	0.011	0	0
FBgn0265724	CR44531		ncRNA	0	1	0	1	0	0	0	0	0	0	0	0	0	0	0	0
FBgn0037760	FBXO11	FBXO11	protein_coding	-0.05562	0.6172	-0.5361	1.564e-06	34.39	27.179	31.718	28.643	41.744	38.607	42.578	39.297	41.572	47.579	46.508	43.984
FBgn0037485	CG14606		protein_coding	0.0395	0.6821	4.318	0.0002177	0.079	0.02	0.241	0.646	0	0.065	0	0.024	0	0	0.016	0.013
FBgn0037936	CG6908		protein_coding	0.1081	0.3414	1.502	0.007782	3.321	3.659	4.951	3.188	1.146	2.026	5.851	0.68	0.831	0.948	1.364	0.732
FBgn0264617	CR43957		ncRNA	0.7983	0.001387	1.694	9.567e-14	2.691	3.517	3.752	3.596	2.102	1.481	2.217	2.172	0.979	1.094	0.964	1.071
FBgn0051955	CG31955		protein_coding	0.008389	0.9826	1.792	3.895e-13	3.374	3.309	4.214	4.191	0.969	0.901	1.339	1.263	1.413	0.902	0.777	1.18
FBgn0284247	ds		protein_coding	0.01178	0.9561	4.468	1.77e-11	0.409	0.489	0.613	0.525	0.024	0.016	0.026	0.03	0.021	0.02	0.015	0.025
FBgn0262532	CR43086		pseudogene	0.3078	0.1055	5.283	2.01e-12	1.154	1.093	0.814	2.126	0.026	0.318	0.085	0.068	0.055	0	0	0.05
FBgn0031321	Tgt	QTRT1	protein_coding	-0.1152	0.2797	-0.2501	0.133	15.943	23.412	16.457	20.525	18.426	18.409	15.478	20.636	26.912	21.943	24.044	19.526
FBgn0263458	snoRNA:CG43051-a		snoRNA	0.04171	0.7165	2.428	4.622e-05	11.184	7.374	9.904	14.665	1.656	2.907	1.982	5.068	1.356	1.67	2.876	1.397
FBgn0259936	Uhg3		ncRNA	-0.889	1.751e-05	-1.304	3.154e-12	24.834	21.858	20.675	20.1	25.814	29.795	31.573	26.458	51.773	53.859	60.679	56.937
FBgn0028530	mTTF		protein_coding	0.02391	0.9044	-0.07298	0.5072	20.358	19.506	18.871	18.419	21.079	22.012	20.899	20.569	21.719	19.488	19.765	20.281
FBgn0260793	2mit		protein_coding	-0.01362	0.9332	1.704	0.0455	0.017	0.004	0.003	0.006	0	0	0	0	0.003	0	0	0
FBgn0261932	CG42798		protein_coding	0.02676	0.8052	1.829	0.03398	0.065	0	0.157	0.047	0.091	0	0	0	0	0	0	0
FBgn0083976	CG34140	PUSL1	protein_coding	-0.05196	0.5959	0.1756	0.01105	31.237	30.288	33.569	33.143	25.653	27.282	27.788	25.944	25.697	28.91	29.341	29.439
FBgn0025686	Amnionless		protein_coding	0	1	3.798	0.001095	0	0.061	0.131	0.073	0	0	0	0	0	0	0	0
FBgn0032467	CG9934	UBE4B	protein_coding	0.02408	0.9033	0.08331	0.4693	35.752	33.639	37.01	35.501	37.709	34.831	33.712	33.234	32.191	34.029	35.055	32.358
FBgn0034814	CG9890	ZNF277	protein_coding	0.007353	0.9926	-0.1636	0.1727	22.496	25.563	20.665	19.479	25.802	25.1	25.063	24.734	26.642	25.18	24.135	23.282
FBgn0039358	CG5028	IDH3G	protein_coding	0.0191	0.9277	0.07905	0.2792	60.039	58.643	71.312	69.094	61.529	61.715	64.557	63.126	59.456	61.42	59.793	64.509
FBgn0035781	CG8560		protein_coding	0.009074	0.9605	1.229	0.1163	0.024	0.099	0.04	0	0	0.016	0.019	0	0	0	0	0.016
FBgn0031638	CG11927		protein_coding	-0.05443	0.6118	-0.06314	0.5396	18.279	18.487	19.543	18.792	19.245	18.496	16.885	17.858	18.869	21.437	21.279	17.042
FBgn0036376	Liprin-beta	PPFIBP1,PPFIBP2	protein_coding	-0.004971	1	-0.168	0.03928	45.744	41.174	43.379	45.869	54.889	54.312	43.172	44.749	45.215	51.683	52.823	48.778
FBgn0030091	CG7065		protein_coding	0.5782	5.271e-11	0.3242	0.0001382	18.226	16.078	17.183	17.223	21.079	22.596	18.974	19.954	12.893	13.972	13.926	13.767
FBgn0035452	CG10359		protein_coding	0.07318	0.5119	4.638	1.413e-29	1.432	2.043	2.83	2.761	0.107	0.171	0.149	0.145	0.048	0.077	0.086	0.131
FBgn0034321	CG14502		protein_coding	0.07626	0.4909	-0.3485	0.1412	1.517	1.481	1.627	1.106	2.503	2.65	2.884	2.247	2.025	1.901	1.759	2.037
FBgn0259708	CG42362		protein_coding	-0.005938	0.9957	-0.5267	0.0434	3.586	3.35	4.943	3.895	7.118	5.339	6.083	5.827	5.503	6.981	7.259	5.534
FBgn0259709	CG42363		protein_coding	-0.005938	0.9957	-0.5267	0.0434	3.586	3.35	4.943	3.895	7.118	5.339	6.083	5.827	5.503	6.981	7.259	5.534
FBgn0003205	Ras85D	HRAS	protein_coding	-0.02308	0.9085	-0.04571	0.6561	79.594	78.913	87.375	78.566	81.529	82.733	79.261	80.134	81.063	83.878	86.313	83.971
FBgn0053145	GalT1		protein_coding	0.001669	1	-0.6313	4.584e-07	21.445	16.75	19.5	17.626	33.231	31.461	27.146	27.907	27.971	30.393	31.89	29.044
FBgn0038272	CG7265	DPH2	protein_coding	0.3443	0.002615	0.9416	1.377e-18	31.525	39.331	36.412	34.209	20.631	25.784	27.551	23.576	19.065	16.002	16.637	20.675
FBgn0030687	CG17209	POLR3A	protein_coding	0.02782	0.8715	-0.2317	0.01964	15.181	14.514	15.404	15.601	17.945	18.783	20.439	17.931	17.407	17.924	18.937	17.432
FBgn0030941	wgn		protein_coding	0.4144	0.01874	3.501	1.023e-80	21.756	27.059	34.964	34.499	2.846	4.06	5.065	4.075	2.141	2.334	2.025	3.85
FBgn0020910	RpL3	RPL3,RPL3L	protein_coding	0.2563	0.03388	0.5238	6.125e-05	1689.71	1742.86	1704.53	1729.46	1435.5	1614.1	1784.37	1399.43	1036.4	1155.55	1095.12	1386.39
FBgn0262116	RNASEK		protein_coding	-0.006031	0.9999	0.381	0.008538	118.231	121.386	130.873	135.187	94.93	84.2	83.683	111.576	92.447	96.722	97.457	93.843
FBgn0044419	Pmi	TMEM11	protein_coding	0.04326	0.7304	0.1377	0.1771	21.125	24.684	24.77	25.739	23.948	22.056	23.224	24.334	21.619	21.552	22.565	21.555
FBgn0029131	Debcl		protein_coding	-0.02892	0.8588	-0.5736	0.0006539	46.263	49.158	44.433	42.563	64.972	57.398	62.829	72.778	72.212	72.8	68.447	68.935
FBgn0027550	CG6495		protein_coding	0.08668	0.4423	0.906	0.02321	0.593	0.57	0.6	0.61	0.566	0.292	0.372	0.559	0.331	0.254	0.152	0.209
FBgn0036505	CG7945		protein_coding	0.009946	0.9767	-0.2132	0.01507	47.47	45.161	43.947	39.601	57.809	52.368	46.84	50.993	49.8	53.513	51.717	49.928
FBgn0037734	trbd	ZRANB1	protein_coding	0.02374	0.897	-0.2012	0.006598	18.842	17.595	19.07	17.737	21.971	22.204	21.436	21.428	20.286	21.579	22.726	19.861
FBgn0033160	Dhx15	DHX15	protein_coding	0.09059	0.1893	0.1043	0.09924	61.966	60.997	55.084	61.121	61.587	61.45	60.313	60.592	54.981	57.414	54.388	55.441
FBgn0036028	CG16717	MPPED2,MPPED1	protein_coding	-0.03233	0.8301	-0.5122	3.464e-09	21.783	20.348	20.057	19.29	28.786	26.315	27.214	29.336	30.73	29.202	30.026	27.257
FBgn0025693	ZnT41F		protein_coding	-0.06719	0.5376	1.295	2.057e-13	12.522	12.365	13.707	14.161	4.373	4.575	3.469	4.882	5.508	5.63	4.257	5.456
FBgn0051793	CG31793		protein_coding	-0.03125	0.8332	-0.1693	0.424	6.185	5.539	6.597	6.074	6.205	6.198	6.48	5.977	6.027	7.013	7.658	7.285
FBgn0035107	mri	BTBD10,KCTD20	protein_coding	-0.09785	0.2534	-0.3656	2.641e-05	45.732	53.431	45.137	45.104	53.355	53.03	51.297	58.709	71.786	60.614	59.418	53.858
FBgn0264693	ens		protein_coding	0.009862	0.9757	-0.3282	5.707e-06	53.936	48.443	56.776	50.899	69.796	68.559	65.49	64.455	63.696	69.144	67.072	64.97
FBgn0022959	yps	YBX2	protein_coding	0.0506	0.6369	0.2693	0.0007375	149.811	159.807	173.636	159.705	136.103	140.498	146.798	145.193	129.751	135.251	126.273	139.888
FBgn0037445	CG9727		protein_coding	-0.03309	0.8256	-0.1078	0.4929	19.066	17.453	19.833	16.807	16.741	18.147	20.891	17.278	18.746	19.669	18.682	22.205
FBgn0035960	CG4942	COX18	protein_coding	0.0185	0.9371	-0.5268	0.0003215	7.905	7.204	7.4	6.603	11.368	11.105	11.89	10.875	10.269	11.172	11.098	10.537
FBgn0266073	CR44826		ncRNA	0.001555	1	0.4743	0.302	1.609	1.009	0.931	0.72	0.217	0.302	1.109	0.28	0.228	0.765	0	0.823
FBgn0260634	eIF4G2		protein_coding	-0.0009166	1	0.2692	0.07378	32.229	28.94	33.359	36.129	26.835	26.223	26.546	26.879	25.912	25.758	27.221	27.855
FBgn0003093	Pkc98E		protein_coding	-0.09237	0.3827	0.5007	0.002239	12.036	13.509	18.359	16.17	6.714	8.056	10.408	7.93	9.783	10.409	9.453	11.405
FBgn0265575	yin		protein_coding	0.04626	0.6995	-0.6981	0.001566	103.588	76.32	72.375	74.44	156.185	147.717	217.006	173.76	138.902	133.774	136.329	164.742
FBgn0000395	cv-2		protein_coding	0.1779	0.1802	3.171	1.951e-39	4.195	6.278	8.708	6.531	0.756	0.999	1.716	0.764	0.553	0.787	0.586	0.89
FBgn0036556	CG5830	CTDSP2,CTDSPL,CTDSP1	protein_coding	0.003299	1	0.6498	1.152e-08	19.611	21.501	27.597	24.063	14.929	13.938	15.177	14.417	13.262	14.192	14.021	16.574
FBgn0035721	CG9948		protein_coding	-0.009572	0.9799	-0.257	0.0581	12.589	14.497	11.555	12.471	16.237	14.587	13.71	15.834	16.178	15.319	15.942	14.329
FBgn0037045	CG10584		protein_coding	-0.3105	0.01108	-0.7331	1.944e-09	12.521	14.147	12.035	10.943	17.737	14.857	13.071	16.778	21.442	22.151	21.285	19.38
FBgn0035692	Sf3b6	SF3B6	protein_coding	0.06061	0.5728	0.3749	0.0009951	118.735	128.349	124.51	124.01	102.204	110.1	102.124	107.05	92.235	92.31	91.373	101.579
FBgn0052027	CR32027		ncRNA	-0.1722	0.1431	-0.9034	3.981e-08	9.631	9.169	9.374	9.013	13.776	12.709	14.895	12.91	18.011	18.583	18.73	17.18
FBgn0037358	elm		protein_coding	-0.003618	1	0.3262	0.0003108	93.054	109.2	100.478	107.643	81.825	74.985	78.644	87.808	86.03	81.631	82.219	75.292
FBgn0010774	Ref1		protein_coding	-0.00818	0.986	-0.2413	0.0002999	213.803	223.342	183.779	198.709	249.719	243.131	215.954	252.848	247.959	251.549	249.018	222.791
FBgn0262467	Scox	SCO2,SCO1	protein_coding	-0.05276	0.6142	-0.2615	0.001136	59.905	63.187	55.405	55.302	68.374	63.283	63.248	67.164	73.281	69.818	69.73	68.439
FBgn0027785	NP15.6	NDUFB11	protein_coding	0.02465	0.8979	0.5331	1.041e-06	125.207	183.539	138.292	156.657	101.745	100.848	104.259	123.923	116.802	99.367	94.965	99.724
FBgn0027509	TBCD	TBCD	protein_coding	0.004115	1	-0.2152	0.04932	23.684	21.595	25.129	23.05	27.195	27.956	28.239	26.647	25.613	27.963	28.589	27.033
FBgn0262614	pyd		protein_coding	-0.0159	0.9511	0.4959	3.448e-05	23.497	23.869	30.358	28.296	17.875	19.225	17.428	16.881	17.413	18.857	19.281	18.337
FBgn0024362	Naa30A	NAA30	protein_coding	-0.01951	0.9168	-0.3143	1.811e-09	48.14	44.093	47.117	44.984	55.975	54.21	58.13	56.852	55.483	60.517	57.663	56.03
FBgn0263600	DNApol-delta	POLD1	protein_coding	-0.295	0.0003813	-1.222	2.674e-57	23.952	19.256	20.251	18.84	40.423	36.803	38.813	36.251	46.604	51.001	50.076	45.385
FBgn0038145	Droj2		protein_coding	-0.006691	0.9957	-0.4093	2.298e-05	308.214	258.02	254.882	281.992	389.859	346.576	342.576	383.246	375.832	386.615	365.636	351.007
FBgn0263039	CR43334		ncRNA	0.0759	0.4992	1.524	6.544e-06	0.247	0.365	0.375	0.44	0.143	0.146	0.198	0.187	0.088	0.104	0.094	0.171
FBgn0031644	CG15625		protein_coding	0.01043	0.9515	2.723	0.009625	0.063	0.095	0.152	0.068	0	0	0.048	0	0	0.022	0	0
FBgn0037780	ohgt		protein_coding	-0.02325	0.9078	0.1082	0.4977	26.343	34	29.278	30.709	25.337	25.756	23.564	29.801	33.366	27.669	25.287	24.628
FBgn0031623	Taf12L		protein_coding	0.04402	0.7061	3.516	2.925e-14	8.928	12.053	8.7	17.396	1.83	1.233	1.232	1.379	0.578	1.015	1.277	1.043
FBgn0033247	Nup44A	SEH1L	protein_coding	0.005448	1	-0.06395	0.698	36.183	43.179	38.523	41.346	42.908	38.64	35.851	51.968	46.399	42.006	40.311	38.334
FBgn0263236	SP1029		protein_coding	-0.01261	0.9576	-1.843	8.609e-08	6.937	7.879	10.548	7.64	30.573	29.004	26.977	26.711	30.691	30.576	30.276	32.066
FBgn0010747	Srp54k	SRP54	protein_coding	0.0893	0.2456	0.194	0.006067	80.397	71.186	80.307	85.149	77.572	77.586	78.248	72.517	64.426	70.339	69.501	72.295
FBgn0266047	CG44812		protein_coding	0	1	0.2355	0.7044	0	0	0	0.093	0	0	0	0	0	0	0	0
FBgn0052675	Tango5	VMP1	protein_coding	0.08239	0.344	-0.03314	0.7421	35.05	32.039	33.651	34.134	33.588	36.655	46.167	37.312	32.287	35.062	34.145	36.595
FBgn0034439	CG10062	ERMP1	protein_coding	-0.002476	1	3.486	2.419e-15	3.399	3.895	4.195	7.246	0.365	0.423	0.359	0.413	0.376	0.246	0.317	0.655
FBgn0036843	Sfxn2	SFXN2	protein_coding	-0.09061	0.3399	-0.1404	0.2289	20.749	22.493	25.838	21.499	22.426	21.502	19.681	23.339	24.36	26.849	25.143	23.956
FBgn0016123	Alp4		protein_coding	-0.01794	0.9332	3.381	2.817e-38	186.878	380.138	465.28	353.745	33.355	30.616	22.357	33.244	42.394	26.13	27.791	34.594
FBgn0000382	csw		protein_coding	0.03121	0.8429	-0.02629	0.8738	23.728	23.583	28.379	24.191	26.693	27.578	27.865	27.104	24.148	26.922	25.554	25.221
FBgn0015774	NetB	NTN3,NTN1	protein_coding	0.05241	0.6448	5.274	4.913e-64	5.266	7.058	10.254	8.354	0.199	0.265	0.292	0.268	0.195	0.227	0.089	0.258
FBgn0047199	CG31517		protein_coding	-0.02709	0.8528	-1.743	2.218e-05	5.885	9.273	5.915	4.276	17.784	17.687	20.117	18.626	27.679	21.571	19.782	23.519
FBgn0038349	AOX3		protein_coding	0.0127	0.9542	0.3994	0.197	46.624	44.545	55.983	48.896	34.269	36.131	38.374	34.383	31.178	32.33	31.506	33.243
FBgn0032633	Lrch		protein_coding	-0.02746	0.8588	-0.2445	0.34	12.177	10.841	13.144	11.283	12.241	12.355	13.986	12.358	13.775	15.558	15.098	14.63
FBgn0033777	CG17574		protein_coding	-0.07304	0.4855	0.1737	0.1962	20.003	23.157	28.541	24.819	17.843	19.228	16.44	20.233	19.684	21.699	23.465	20.127
FBgn0036684	CG3764		protein_coding	-0.01039	0.9706	-0.3547	0.1373	12.883	11.629	13.116	10.601	16.025	15.577	15.038	15.405	15.181	16.187	17.903	16.238
FBgn0025807	Rad9		protein_coding	-0.05029	0.6716	-0.5475	8.056e-07	9.269	8.027	8.053	8.933	11.947	11.345	11.585	11.586	12.565	13.179	13.516	11.67
FBgn0035710	SP1173		protein_coding	0.03637	0.7935	3.86	1.053e-73	61.524	92.449	136.069	102.701	6.723	9.042	8.204	6.713	6.429	6.443	5.074	8.767
FBgn0040064	yip2	ACAA2	protein_coding	-0.07957	0.4453	-0.19	0.1927	130.179	158.145	152.608	132.864	140.677	133.081	131.173	156.451	175.376	170.495	159.354	155.871
FBgn0031286	CG3862	RCC1L	protein_coding	-0.04741	0.6974	-0.3556	0.03549	8.33	9.117	9.295	9.663	11.061	10.526	10.851	9.371	11.777	12.168	12.389	11.539
FBgn0052758	CG32758	SNX27	protein_coding	-0.07138	0.4686	-0.2389	0.01492	21.545	20.239	23.123	20.529	22.893	21.734	24.637	21.83	24.648	26.168	24.808	25.781
FBgn0063493	GstE7		protein_coding	-0.03581	0.7909	-1.333	2.029e-06	8.597	11.893	7.734	8.851	21.493	21.06	18.318	22.552	27.917	26.31	22.538	23.929
FBgn0243516	Vrp1		protein_coding	0.03102	0.8448	0.003329	0.9971	15.602	14.675	16.829	16.186	15.925	17.928	16.162	16.771	15.129	15.618	16.25	16.158
FBgn0000317	ck	MYO7A	protein_coding	0.1922	0.08498	0.05728	0.7163	16.608	11.117	12.743	15.036	15.684	18.654	18.151	16.214	13.126	11.651	12.634	15.781
FBgn0030605	ND-B18	NDUFB7	protein_coding	0.009441	0.9806	0.6438	9.784e-07	43.992	61.382	47.767	56.181	31.57	31.502	29.598	40.956	35.916	34.084	30.757	29.904
FBgn0050357	CG30357		protein_coding	0.1374	0.2773	2.172	3.988e-11	1.479	1.701	1.727	1.704	0.426	0.676	0.592	0.641	0.243	0.322	0.396	0.471
FBgn0004368	Ptp4E		protein_coding	0.03324	0.8251	0.2855	0.005592	19.162	19.944	21.733	19.968	17.938	17.214	17.249	17.315	16.359	16.105	17.155	16.184
FBgn0036213	RpL10Ab	RPL10A	protein_coding	0.1431	0.1794	0.7321	1.614e-07	2162.09	2938.12	2181.09	2405.9	1620.01	1814.21	1932.65	1793.1	1493.5	1317.73	1229.03	1619.89
FBgn0034792	YME1L	YME1L1	protein_coding	0.008102	0.9842	0.09481	0.1347	60.892	63.381	54.952	61.136	57.035	56.316	56.395	57.111	59.137	56.926	54.727	54.043
FBgn0037290	CG1124		protein_coding	0.04061	0.732	0.2231	0.5161	5.379	3.192	3.081	9.014	3.32	3.446	6.37	9.847	5.971	2.126	2.083	5.383
FBgn0031871	Fgop2		protein_coding	-0.02906	0.8569	-0.4483	1.359e-08	25.204	24.197	24.397	22.294	32.734	31.529	29.987	32.48	31.729	34.037	35.046	31.152
FBgn0040373	CG3038		protein_coding	-0.09285	0.3218	-0.586	1.929e-08	15.789	14.724	14.78	13.368	20.54	19.241	19.084	18.684	24.463	22.391	22.03	20.422
FBgn0036036	CG14174		protein_coding	0.0268	0.8788	0.06523	0.7068	8.552	10.391	9.469	9.608	8.771	9.065	10.507	10.502	8.651	9.455	8.161	9.906
FBgn0040397	CG3655		protein_coding	-0.08768	0.4278	0.02966	0.9186	15.374	16.331	18.986	18.529	13.425	13.011	12.594	11.325	16.084	17.365	17.39	16.663
FBgn0265464	Traf6		protein_coding	0.0185	0.9371	-0.3634	3.931e-05	14.468	12.428	13.632	12.57	18.459	17.94	16.406	17.938	17.424	16.864	18	16.502
FBgn0033668	exp		protein_coding	0.04942	0.6317	0.69	0.1242	0.321	0.282	0.226	0.415	0.107	0.122	0.386	0.365	0.119	0.138	0.04	0.187
FBgn0003015	osk		protein_coding	-0.006319	0.9917	-0.5051	0.1793	323.333	231.587	224.335	241.076	445.396	411.975	517.683	439.876	452.756	501.173	475.135	550.726
FBgn0028886	CG15279		protein_coding	0.0004909	1	0.1015	0.7791	2.934	2.902	4.798	5.58	3.978	4.755	2.225	3.384	3.192	2.874	5.68	2.524
FBgn0032329	Art8	PRMT2	protein_coding	0.1086	0.3028	0.5813	0.0001813	23.162	23.421	22.144	24.029	14.706	18.861	22.536	18.915	14.755	13.861	12.677	18.629
FBgn0010651	MFS14		protein_coding	0.1111	0.3492	3.139	8.532e-17	12.012	11.904	14.197	17.896	2.188	2.53	2.88	2.542	1.689	1.252	0.817	2.405
FBgn0267219	CR45659		ncRNA	0	1	0.4782	0.4251	0	0	0	0.055	0	0	0	0	0	0	0	0
FBgn0032404	RpL7-like		protein_coding	0.03147	0.8371	-0.08187	0.6377	51.946	54.046	61.088	57.603	60.36	65.661	70.323	64.134	55.378	60.537	58.588	64.593
FBgn0085193	CG34164		protein_coding	0.03144	0.8371	-0.08222	0.6359	52.592	54.695	61.794	58.287	61.11	66.434	71.18	64.918	56.018	61.289	59.316	65.395
FBgn0029922	CG14431		protein_coding	0.003435	1	0.3081	0.369	0.115	0.101	0.136	0.174	0.067	0.083	0.124	0.099	0.109	0.094	0.095	0.06
FBgn0262003	CG42821		protein_coding	0.1091	0.3591	2.362	5.103e-08	23.555	25.58	31.529	25.294	5.493	6.901	15.022	7.432	6.801	3.592	4.381	5.043
FBgn0039229	Saf-B		protein_coding	0.06957	0.372	-0.1475	0.01658	35.852	33.773	35.366	36.748	43.879	46.022	39.591	39.809	36.961	41.557	38.971	39.75
FBgn0283525	l(2)10685	NSUN4	protein_coding	0.04149	0.7551	0.3005	0.003072	12.682	14.483	12.919	13.547	11.611	11.703	11.399	11.613	11.212	10.101	10.832	11.055
FBgn0020294	ko		protein_coding	0.2762	0.09894	2.088	4.443e-14	2.59	2.976	4.512	4.072	0.695	1.414	1.911	1.463	0.641	0.782	0.526	1.325
FBgn0038617	CG12333	WDR37	protein_coding	-0.05635	0.6091	-0.3569	0.001586	18.544	18.312	19.426	19.501	23.736	21.527	20.448	22.939	24.205	25.473	25.792	22.748
FBgn0004367	mei-41		protein_coding	-0.01598	0.9511	-0.2581	0.0241	7.585	6.465	7.506	7.075	8.045	8.041	9.173	8.215	8.144	8.6	9.125	8.665
FBgn0003396	shn		protein_coding	0.2452	0.04988	0.5945	2.499e-05	10.243	10.671	11.768	10.749	10.168	8.582	10.848	8.147	6.463	6.455	7.268	7.791
FBgn0027279	l(1)G0196	PPIP5K2,PPIP5K1	protein_coding	0.02684	0.8808	0.04595	0.7503	15.03	15.66	19.427	15.91	16.156	17.657	18.324	15.405	14.334	16.316	16.159	17.039
FBgn0040532	CG8369		protein_coding	0.03727	0.7717	4.895	3.149e-43	23.02	49.67	39.94	36.85	1.293	1.559	1.882	1.474	1.177	1.55	0.78	1.294
FBgn0035272	mRpL46	MRPL46	protein_coding	-0.06086	0.5527	-0.08802	0.3951	49.676	56.774	43.141	47.37	45.666	44.573	47.85	53.071	59.739	49.504	49.76	50.585
FBgn0262976	lawc		protein_coding	0.002051	1	-0.1371	0.3594	8.416	9.639	9.365	10.314	10.155	9.658	10.158	12.049	10.693	10.487	10.687	9.948
FBgn0259984	kuz		protein_coding	-0.007123	0.993	0.1735	0.2072	26.538	27.106	32.943	28.646	23.695	25.531	26.031	24.443	23.823	26.443	25.861	25.247
FBgn0027356	Amph	BIN1	protein_coding	0.001078	1	0.4804	0.05457	43.436	39.645	56.607	58.38	32.485	31.361	34.823	32.058	30.705	32.812	32.334	34.061
FBgn0040602	CG14545		protein_coding	0.002763	1	-0.5659	0.004292	151.058	117.717	109.882	112.421	196.618	184.01	214.683	182.366	177.402	191.945	202.6	197.023
FBgn0033994	CG7544		protein_coding	-0.1699	0.1398	-1.177	1.169e-13	9.919	8.828	8.016	8.055	16.477	14.683	15.042	15.283	19.425	20.249	22.248	19.11
FBgn0029820	CG16721		protein_coding	0.03163	0.8263	1.041	2.282e-06	35.626	46.826	53.878	47.703	20.876	24.436	26.443	23.637	20.747	19.901	21.328	21.485
FBgn0005666	bt		protein_coding	0.03434	0.7902	5.233	2.268e-21	15.761	23.339	32.091	26.008	0.62	1.009	0.993	0.709	0.415	0.538	0.349	1.007
FBgn0011745	Arp1	ACTR1A	protein_coding	0.01123	0.9707	0.4998	1.163e-06	113.194	146.638	128.753	126.43	86.228	83.308	92.655	104.827	99.305	87.572	86.104	86.599
FBgn0053995	CG33995		protein_coding	-0.02747	0.8756	-0.001416	1	63.085	64.382	70.032	68.709	62.628	64.961	62.532	64.406	66.337	66.929	65.552	67.691
FBgn0264743	CG44001	ANKRD39	protein_coding	-0.02737	0.8757	-0.0002909	1	61.178	62.421	67.873	66.627	60.666	62.945	60.595	62.397	64.259	64.843	63.499	65.58
FBgn0264742	CG44000		protein_coding	-0.02737	0.8757	-0.0002909	1	61.178	62.421	67.873	66.627	60.666	62.945	60.595	62.397	64.259	64.843	63.499	65.58
FBgn0039183	Dis3	DIS3	protein_coding	0.06858	0.4435	0.1429	0.06297	41.027	39.881	35.292	33.954	36.268	36.938	38.122	36.202	34.047	33.079	34.664	33.853
FBgn0263619	ASTR		ncRNA	0.02137	0.8921	0.563	0.1538	0.36	0.618	0.337	0.621	0.255	0.091	0.127	0.76	0.268	0.218	0.131	0.298
FBgn0039789	CG9717	SLC26A11	protein_coding	0.0299	0.798	6.46	7.1e-14	1.755	3.093	5.261	3.136	0.01	0.038	0.065	0.078	0.074	0.01	0	0.019
FBgn0051072	Lerp		protein_coding	0.01289	0.9608	0.4949	4.461e-06	29.879	30.94	37.48	34.06	23.385	24.543	23.161	23.869	21.433	23.583	25.735	21.896
FBgn0029999	CG1575		protein_coding	-0.0567	0.6078	-0.6307	4.1e-08	22.555	24.647	22.015	20.96	31.395	30.187	32.323	33.93	37.506	35.934	36.978	31.805
FBgn0035904	GstO3		protein_coding	0.1804	0.2039	2.819	9.983e-07	17.446	23.159	26.968	26.446	6.661	6.904	9.358	8.06	3.071	2.755	2.845	3.73
FBgn0029849	Efr	SLC35B4	protein_coding	-0.08016	0.4377	-0.1404	0.3255	21.336	25.034	27.006	24.358	23.477	21.847	20.544	26.844	27.724	26.308	27.631	26.811
FBgn0029958	Pdp		protein_coding	-0.05836	0.5952	-0.1085	0.4231	38.288	46.494	41.482	38.897	39.567	38.408	39.202	42.231	46.715	44.465	46.587	41.078
FBgn0039528	dsd		protein_coding	-0.04715	0.6566	-0.5304	2.93e-15	21.319	19.471	21.683	19.427	28.675	27.479	28.098	28.152	27.41	30.959	32.111	28.494
FBgn0033081	geminin		protein_coding	-0.06092	0.5683	-0.9746	6.229e-20	94.127	95.201	76.199	78.251	176.556	159.169	129.685	152.336	170.45	176.845	179.007	160.335
FBgn0031491	alpha4GT1		protein_coding	-0.01172	0.9686	-0.3923	3.166e-05	30.137	28.596	27.036	27.815	37.425	36.426	35.66	37.94	37.364	40.065	36.96	35.949
FBgn0020370	TppII	TPP2	protein_coding	0.1033	0.2396	-0.02867	0.8025	97.45	82.595	86.852	86.485	103.199	101.718	108.803	100.28	85.911	89.835	93.622	91.339
FBgn0030030	CG1636		protein_coding	-0.01833	0.9371	-0.6313	1.464e-16	24.265	21.291	21.264	19.963	33.96	33.619	32.411	32.093	31.643	34.938	35.705	33.15
FBgn0025815	Mcm6	MCM6	protein_coding	-0.0466	0.706	-0.7074	4.775e-07	56.132	61.625	51.726	54.364	88.485	83.574	76.206	88.416	94.704	98.053	95.672	88.147
FBgn0051875	CG31875		protein_coding	-0.1921	0.06206	-0.6319	2.451e-08	15.448	12.395	13.116	12.852	18.61	16.791	14.839	17.345	19.359	22.075	22.285	21.155
FBgn0284220	Top2		protein_coding	-0.01637	0.949	-0.6251	2.254e-13	121.728	96.293	103.393	101.678	160.869	165.378	170.481	146.265	151.03	167.551	166.332	174.32
FBgn0035878	CG7182	HSPA14	protein_coding	-0.04548	0.7132	-0.415	6.714e-05	98.432	108.174	80.06	89.816	114.87	112.772	115.657	125.479	149.358	123.628	122.658	111.895
FBgn0003638	su(w[a])		protein_coding	-0.03641	0.7947	-0.1591	0.4225	29.801	27.507	30.434	32.225	27.841	30.421	33.345	28.686	33.201	33.225	33.739	35.911
FBgn0028700	RfC38	RFC3	protein_coding	-0.05304	0.6448	-0.4397	0.0003507	44.122	51.918	39.106	43.369	55.687	55.283	47.986	62.155	70.496	61.703	60.71	53.221
FBgn0014877	Roe1	GRPEL1,GRPEL2	protein_coding	0.001655	1	-0.6054	2.421e-12	70.043	55.655	54.826	61.192	100.782	84.49	93.801	93.371	90.72	95.261	94.81	90.69
FBgn0030183	CG15309	YPEL2	protein_coding	0.0333	0.8014	0.4094	0.184	17.988	19.492	25.19	22.041	17.479	17.51	17.59	18.772	12.821	13.607	14.615	13.985
FBgn0036369	CG10089		protein_coding	-0.1196	0.3228	1.164	0.0002166	0.897	1.149	1.754	1.558	0.379	0.258	0.354	0.308	0.737	0.463	0.594	0.319
FBgn0021895	ytr		protein_coding	0.03608	0.8021	0.1753	0.1047	56.876	63.725	71.599	65.247	58.199	60.896	59.335	63.239	54.553	56.458	55.497	60.39
FBgn0034282	Mapmodulin	ANP32A,ANP32B,ANP32E	protein_coding	-0.06498	0.4876	-0.5071	9.312e-12	126.341	126.608	134.88	124.162	167.623	171.214	172.591	163.348	174.378	185.906	181.146	191.169
FBgn0026150	ApepP	XPNPEP1	protein_coding	0.03345	0.824	0.0594	0.6298	56.881	51.072	57.383	57.535	56.741	58.142	57.801	54.23	51.802	52.639	53.069	56.002
FBgn0030037	Miga	MIGA2	protein_coding	-0.02442	0.8996	-0.6606	2.504e-12	29.246	27.284	24.679	25.345	42.682	40.103	41.102	39.901	43.087	43.615	43.216	40.658
FBgn0037121	Rpb8		protein_coding	0.02198	0.9188	0.455	7.148e-05	66.137	67.975	54.521	65.061	44.902	44.93	50.099	50.636	44.894	46.268	41.278	49.79
FBgn0010341	Cdc42	CDC42,AL031281.2	protein_coding	0.02328	0.9088	0.4298	4.406e-05	120.905	120.356	141.299	131.1	95.548	103.489	97.438	96.895	87.728	96.936	96.499	95.69
FBgn0036000	CG3434	QTRT2	protein_coding	0.2975	0.01822	0.8638	2.088e-11	30.794	29.516	28.741	33.459	14.96	23.156	30.577	20.466	15.317	16.956	15.758	17.59
FBgn0265955	CR44742		ncRNA	0	1	0	1	0	0	0	0	0	0	0	0	0	0	0	0
FBgn0030361	CG1492		protein_coding	0.007762	0.9912	-0.5319	3.756e-06	5.779	4.296	4.127	4.54	7.242	6.083	7.115	7.496	7.837	6.887	6.701	6.09
FBgn0028516	ZnT35C		protein_coding	-0.02105	0.921	-1.202	8.973e-13	20.197	17.921	14.657	15.734	34.968	35.362	42.619	39.569	40.448	39.935	37.043	45.322
FBgn0027780	U26		protein_coding	0.2797	0.006516	0.02518	0.8446	6.738	6.642	7.769	7.938	9.035	9.745	9.403	8.735	6.669	6.888	7.415	7.636
FBgn0034817	Art7	PRMT7	protein_coding	0.0646	0.5523	0.04243	0.8117	25.341	28.976	25.142	22.408	24.533	27.907	33.457	28.597	26.675	24.569	23.141	24.246
FBgn0266101	CG44838		protein_coding	-0.003716	1	-0.5144	0.003298	29.306	24.888	25.957	22.819	38.604	37.853	37.623	37.055	35.692	39.834	39.215	38.331
FBgn0037906	PGRP-LB		protein_coding	0.05717	0.6083	2.19	1.817e-14	4.093	3.206	4.537	3.815	0.929	1.005	1.362	1.128	0.866	0.722	0.851	0.94
FBgn0023130	a6		protein_coding	-0.01816	0.9403	-0.4942	3.802e-05	14.67	12.917	11.661	13.669	18.386	18.279	18.1	18.192	18.423	18.973	20.38	18.057
FBgn0266599	Hsc70-4	HSPA2	protein_coding	0.1116	0.1622	0.293	0.000255	2391.31	2434.09	2287.33	2467.92	2110.55	2201.98	2362.67	2196.77	1840.89	1953.99	1861.39	2126.24
FBgn0003607	Su(var)205	CBX1	protein_coding	-0.06597	0.5016	-0.07768	0.4258	205.55	225.938	183.537	194.885	206.15	187.636	169.519	216.409	245.083	208.513	200.42	201.896
FBgn0267241	CR45681		ncRNA	0.01005	0.963	2.456	0.0004774	0.762	1.415	1.235	1.255	0.12	0.167	0.387	0.18	0.063	0.181	0.033	0.426
FBgn0261291	CheA86a		protein_coding	0	1	0.7073	0.2984	0	0.094	0	0.033	0	0	0	0	0	0	0	0
FBgn0029798	CG4078	RTEL1-TNFRSF6B,RTEL1	protein_coding	-0.07452	0.4915	-0.5672	0.001103	12.458	14.732	12.139	12.849	18.712	16.582	13.94	16.724	22.335	20.066	21.152	17.08
FBgn0037222	CG14642		protein_coding	-0.001584	1	4.121	0.0001972	0.054	0.274	0.635	0.117	0.019	0.018	0	0	0	0.039	0	0
FBgn0033458	CG18446		protein_coding	-0.6192	3.764e-05	-1.371	2.377e-24	20.175	19.953	27.71	27.05	33.116	42.604	50.36	30.218	64.84	57.858	58.591	68.015
FBgn0043010	Fsn	FBXO45	protein_coding	-0.1353	0.02988	-0.2368	8.689e-05	46.397	48.2	44.134	49.217	51.606	47.82	45.891	50.018	56.849	56.615	57.73	50.851
FBgn0083950	CG34114		protein_coding	-0.09113	0.3812	0.3602	0.3623	0.026	0.005	0.021	0.041	0	0	0.012	0.003	0.019	0.015	0.012	0.007
FBgn0033463	CG1513	OSBPL9	protein_coding	-0.01741	0.943	-0.02838	0.7855	26.219	24.547	28.663	27.486	27.742	28.052	26.253	24.308	25.708	28.721	28.2	26.503
FBgn0032371	CG4983		protein_coding	0.01108	0.9515	0.07052	0.902	0	0	0	0.017	0	0.015	0	0.014	0	0.016	0	0
FBgn0032805	CG10337		protein_coding	-0.01783	0.9403	1.059	1.45e-14	8.991	10.985	10.174	10.932	4.337	4.322	4.807	4.901	4.347	4.71	4.097	6.037
FBgn0259164	CG42269		protein_coding	0.02138	0.8929	0.1702	0.6475	0.809	0.869	0.564	0.655	0.424	0.936	0.839	0.798	0.482	0.566	0.741	0.446
FBgn0086711	mol		protein_coding	-0.04031	0.7505	-1.549	1.476e-07	14.205	16.273	13.04	10.02	43.312	35.465	20.815	33.996	40.567	44.376	47.067	33.482
FBgn0261477	slim		protein_coding	-0.006768	0.9951	-0.02321	0.8713	40.593	37.76	46.006	39.497	41.13	38.628	44.111	40.595	38.984	43.382	43.739	40.557
FBgn0266572	ebo		protein_coding	-0.02258	0.9144	-0.4683	9.355e-06	35.967	29.455	32.91	31.835	44.707	45.448	45.39	39.398	41.981	45.699	48.004	46.73
FBgn0003517	sta	RPSA	protein_coding	0.3739	0.01764	0.7682	1.604e-06	2270.28	2776.91	2277.79	2724.24	1727.29	2097.17	2234.05	2295.76	1458.86	1301.16	1166.48	1742.24
FBgn0032702	CG10376		protein_coding	-0.01535	0.9515	0.06766	0.5281	24.195	21.588	26.106	22.84	21.591	22.541	22.258	21.625	21.265	23.116	22.864	23.014
FBgn0030686	mRpL3	MRPL3	protein_coding	-0.02563	0.8843	0.08366	0.3338	50.877	62.636	49.915	55.676	49.517	45.598	50.462	53.664	52.942	52.328	51.596	49.551
FBgn0015546	spel1	MSH2	protein_coding	-0.08389	0.37	-0.465	1.437e-06	21.882	19.816	21.193	18.323	24.804	25.469	24.96	24.895	26.6	29.019	30.815	26.85
FBgn0027932	Akap200		protein_coding	0.02763	0.875	0.6113	6.294e-08	213.361	192.563	228.669	227.267	155.796	155.148	138.236	136.431	130.677	140.44	140.667	142.435
FBgn0037236	Skp2		protein_coding	-0.01137	0.9706	-0.4689	4.225e-06	43.941	34.269	33.93	39.417	48.2	55.354	52.469	51.942	51.851	54.522	51.79	54.105
FBgn0039197	CG17780		protein_coding	0.009947	0.9563	1.151	0.1201	0	0	0.057	0.017	0.017	0	0	0	0	0	0	0
FBgn0037078	CG12971		protein_coding	0.01219	0.9605	1.989	7.21e-10	1.302	0.879	1.055	1.597	0.279	0.415	0.241	0.36	0.147	0.31	0.156	0.556
FBgn0267107	CR45547		ncRNA	0	1	1.933	0.03726	0.123	0.124	0.099	0	0	0	0	0	0	0	0	0
FBgn0032775	CG17544		protein_coding	-0.009825	0.976	1.39	3.114e-18	9.933	16.762	19.47	13.583	5.844	5.346	4.559	5.942	5.494	5.283	5.975	5.597
FBgn0004650	fs(1)N		protein_coding	0.03564	0.7975	-0.9219	6.239e-06	35.69	24.555	25.469	25.353	53.794	60.634	83.823	59.1	51.59	52.75	52.792	67.347
FBgn0021761	Nup154	NUP155	protein_coding	-0.02401	0.9044	-0.7221	6.669e-12	38.079	32.944	33.353	33.043	56.176	57.508	55.482	51.239	53.609	57.297	60.652	58.922
FBgn0015805	HDAC1	HDAC2	protein_coding	-0.01237	0.9646	-0.4144	5.447e-05	93.805	89.971	89.311	90.382	132.528	129.944	102.666	113.717	114.196	129.338	127.903	118.276
FBgn0010825	Gug		protein_coding	-0.005248	1	-0.5527	4.941e-06	35.859	31.665	32.346	32.624	50.633	51.993	45.842	47.392	45.569	52.779	51.896	47.886
FBgn0037926	Elp1	ELP1	protein_coding	0.0669	0.5179	0.1718	0.1288	24.102	21.587	24.034	22.93	21.572	23.48	25.575	20.962	18.814	20.174	20.867	21.961
FBgn0038679	CG6040		protein_coding	0.08487	0.4538	2.913	3.082e-17	15.555	17.263	24.715	23.797	2.752	4.133	5.205	3.639	2.413	2.395	1.606	4.131
FBgn0260941	app	ZDHHC14	protein_coding	-0.07	0.4896	-0.4674	5.276e-06	7.551	6.01	7.131	7.07	8.753	9.223	9.117	7.619	8.977	10.101	10.099	9.685
FBgn0039942	CG17163		protein_coding	-0.1789	0.09819	-0.9901	1.824e-14	34.763	31.769	27.383	24.478	48.139	46.777	45.246	48.603	61.515	60.975	60.308	57.991
FBgn0036900	CG8765		protein_coding	0.09543	0.2914	-0.4343	6.534e-06	17.579	13.818	15.789	13.003	23.735	23.316	24.634	22.225	19.957	20.538	22.044	19.568
FBgn0083956	CG34120		protein_coding	0.01427	0.9494	0.2909	0.3456	3.677	3.412	3.855	3.896	2.405	3.198	3.46	3.196	2.72	2.601	2.386	3.168
FBgn0265630	sno		protein_coding	-0.1203	0.2039	-0.8167	7.841e-14	13.926	13.445	13.671	12.749	23.643	20.824	17.498	19.069	22.852	25.398	25.734	22.511
[truncated: 14,110 more rows]

## Sheet: Transposons
	Log2 fold change and adjusted p-value reported by DESeq2				RPKM per sample
Name	log2FC [sh_panx/sh_w]	padj [sh_panx/sh_w]	log2FC [sh_ctp/sh_w]	padj [sh_ctp/sh_w]	sh_ctp.1	sh_ctp.2	sh_ctp.3	sh_ctp.4	sh_panx.1	sh_panx.2	sh_panx.3	sh_panx.4	sh_w.1	sh_w.2	sh_w.3	sh_w.4
412	0.06139	0.5716	0.4244	0.1357	13.4	17.2	20.1	18.6	16.1	16	16.6	15.9	11	11.8	11.8	11.4
mdg1	1.233	0.0002003	3.628	4.196e-33	3.6	5.3	7.6	6.7	0.7	1.3	1.7	1.2	0.4	0.5	0.4	0.5
gypsy	-1.291	0.0001267	3.309	5.774e-27	36.8	11.2	23.1	25.2	0.7	0.7	1	1	2.1	1.9	2.4	3.1
Stalker2	1.583	1.967e-05	4.094	1.351e-32	4.4	6.7	8.5	6.9	0.6	2.2	1.3	1	0.3	0.4	0.3	0.5
GATE	4.979	7.273e-36	6.196	2.302e-57	7.1	8.3	12	7.9	1.1	3.9	6.6	3.2	0.1	0.1	0.1	0.1
Stalker	5.169	2.675e-18	4.478	4.79e-15	0.2	0.3	0.3	0.2	0.1	0.7	0.5	0.2	0	0	0	0
Stalker4	0.7233	0.05498	4.661	3.899e-06	0.1	0	0.1	0.1	0	0	0	0	0	0	0	0
297	0.2012	0.1843	3.044	5.983e-14	2.8	4.4	6	5	0.8	1.1	1.2	1	0.6	0.5	0.5	0.5
NOF	0.001392	1	1.957	1.658e-06	0.2	0.4	0.4	0.3	0.1	0	0.1	0.1	0.1	0.1	0	0.1
17.6	0.09211	0.4193	2.826	2.097e-13	12.9	15.8	25.2	16.4	2.2	4.1	5.4	3.5	1.9	2.3	2.4	3
Quasimodo	0.1637	0.2482	2.135	9.345e-05	1.6	1.7	1.9	1.7	0.5	1	0.9	0.8	0.3	0.3	0.3	0.4
Tabor	0.2911	0.1208	2.581	2.583e-08	0.7	1.1	1.7	0.8	0.2	0.4	0.4	0.5	0.2	0.2	0.1	0.2
gtwin	0.01861	0.9164	1.337	0.002586	0.1	0.1	0.2	0.1	0	0	0.1	0.1	0	0	0	0.1
I-element	1.848	5.592e-11	3.225	1.085e-32	7.7	8.7	11	10.6	1.8	4.4	5.5	3.6	0.6	1.6	0.9	1
Cr1a	1.842	3.261e-11	3.66	1.223e-45	1.1	1.7	1.6	1.5	0.3	0.4	0.5	0.6	0.1	0.1	0.1	0.1
ZAM	-1.283	0.003898	2.209	2.349e-07	0.7	0.8	1	0.8	0	0	0.1	0.1	0.2	0.2	0.1	0.2
Idefix	1.004	0.008049	2.819	4.875e-12	0.5	0.6	0.9	0.8	0.2	0.3	0.3	0.3	0.2	0	0.1	0.1
gypsy3	-1.616	0.004096	-0.6389	0.09039	0	0	0	0.1	0	0	0	0	0.1	0.1	0.1	0.1
Ivk	1.728	6.266e-08	3.847	1.755e-38	1.5	2.1	2.2	2.1	0.2	0.5	0.5	0.7	0.1	0.1	0.1	0.2
micropia	2.974	2.004e-08	4.846	6.325e-24	0.9	1.1	1.8	1.8	0.2	0.6	0.5	0.2	0.1	0	0	0.1
F-element	0.6398	0.01565	3.338	5.943e-30	7.9	10.7	14.8	10.8	1.1	2.5	2.8	2.2	0.8	1	0.9	1.5
gypsy5	-0.01937	0.9114	2.097	0.003046	0.1	0	0.2	0.1	0	0	0	0	0	0	0	0
gypsy11	0.01124	0.9575	1.641	0.03959	0	0	0	0	0	0	0	0	0	0	0	0
FB	0.2033	0.1587	2.749	1.225e-21	3.7	3.5	5.6	5	0.8	1.4	1.1	1	0.5	0.5	0.8	0.8
opus	0.1139	0.3376	2.182	1.16e-08	2	3.5	5.8	4.3	1	0.9	1	2.6	0.9	0.8	0.7	0.9
X-element	1.578	0.0002059	3.095	4.79e-15	0.6	0.8	1.2	1.1	0.2	0.4	0.5	0.4	0.1	0.1	0.1	0.1
Max-element	4.076	5.018e-25	3.371	2.069e-18	17.3	20.3	22.7	18.9	18.6	31.5	51.3	27.4	1.5	1.4	1.8	2.7
blood	6.92	8.304e-75	4.799	4.364e-37	59.5	43.1	44.8	34.3	199.2	178	204.7	205.2	1.5	1.4	1	2.3
rooA	1.119	0.002634	2.05	1.563e-08	0.3	0.4	0.4	0.3	0.2	0.2	0.3	0.3	0.1	0.1	0.1	0.1
gypsy2	2.179	1.856e-05	4.438	5.377e-22	0.6	1	1	0.6	0.1	0.2	0.3	0.2	0	0	0	0
mdg3	5.99	8.391e-39	6.639	1.977e-49	74.4	74	96.5	81.3	21	111.9	51.8	15.3	0.7	0.6	0.6	1.1
P-element	0.3618	0.05873	2.949	9.253e-32	1.3	0.9	1.3	1.3	0.3	0.3	0.4	0.2	0.2	0.1	0.2	0.1
Doc	0.1537	0.2225	1.686	5.59e-10	61.8	52.1	83.7	69.6	19.1	29.4	45.3	28.4	19.1	18.3	16.7	26.5
transib1	-0.008146	0.9776	1.599	0.007643	0.1	0.2	0.2	0.2	0	0.1	0	0	0	0	0.1	0.1
G5A	-0.01562	0.9421	0.404	0.07639	0.9	1.2	1.3	1.4	0.6	0.9	0.9	0.8	0.8	1	0.7	1
jockey	1.853	2.456e-09	2.12	1.689e-12	9	9.2	11	10.9	5.9	14.5	9.3	5.8	2.2	2.2	1.9	2.8
G2	0.08972	0.4393	3.398	1.195e-13	0.9	0.5	0.6	1	0	0.2	0.2	0.1	0.1	0	0.1	0.1
gypsy4	0.1204	0.3174	3.008	3.797e-17	0.9	1.4	1.6	1.3	0.2	0.3	0.3	0.2	0.1	0.1	0.1	0.2
roo	0.08591	0.4322	2.521	4.358e-19	8.5	9.9	11.2	11.6	1.6	2.5	2.8	3	1.5	1.6	1.4	2.6
flea	1.796	1.145e-07	2.777	9.366e-18	13.7	17.9	23.6	21.2	5.4	11.5	18.5	6.4	2	2.4	2.7	3.7
copia	3.874	2.807e-56	4.527	7.036e-78	891.5	713.3	1046.1	715.5	417.2	538.4	649.8	521.3	28	36.9	39.6	38.8
gypsy10	0.008932	0.9732	0.8714	0.00345	0.2	0.3	0.3	0.3	0.1	0.2	0.2	0.1	0.2	0.1	0.1	0.1
Q-element	-0.001923	1	1.309	0.08217	0	0.1	0.1	0	0	0	0	0	0	0	0	0
baggins	0.6267	0.03156	3.48	4.316e-19	0.3	0.4	0.5	0.6	0.1	0.1	0.1	0.1	0.1	0	0	0.1
Juan	1.619	4.881e-07	3.74	3.661e-35	7.7	9.3	13.2	8.1	1.2	2.1	4.5	1.6	0.9	0.5	0.6	0.8
Fw2	0.06737	0.5445	2.168	0.003538	0.1	0.1	0.1	0	0	0	0	0	0	0	0	0
Rt1a	0.2185	0.183	3.503	1.675e-10	0.1	0.3	0.3	0.2	0	0	0.1	0.1	0	0	0	0
McClintock	3.909	5.269e-24	5.722	1.315e-53	6.7	6.1	11.5	6.8	1.2	3.1	2.6	1.8	0.1	0.1	0.1	0.2
BS	0.2356	0.1463	1.584	1.048e-05	1.3	2.3	2.5	2.6	0.9	0.9	0.8	2.4	0.7	0.6	0.7	0.7
1360	0.5102	0.008973	2.041	1.272e-25	2.5	3.1	4	3.6	0.9	1.4	1.5	1.4	0.8	0.7	0.9	0.8
Porto1	0.1863	0.2115	2.373	3.682e-07	0.4	0.5	1	0.7	0.2	0.3	0.3	0.3	0.1	0.1	0.1	0.2
G4	0.07515	0.4993	1.89	1.676e-06	0.8	0.6	1	0.9	0.4	0.4	0.2	0.3	0.2	0.2	0.2	0.3
invader4	3.542	1.175e-22	5.846	1.553e-64	9	12.3	11.2	14.5	1.1	4.2	2.3	1.8	0.2	0.2	0.2	0.2
Doc3-element	1.34	1.812e-12	1.603	2.508e-18	1.7	2.3	2.5	1.9	1.2	1.9	2.5	1.6	0.6	0.8	0.6	0.7
Helena	0.04769	0.6724	2.001	0.01349	0.2	0.1	0.3	0.1	0.1	0.1	0	0.1	0	0.1	0	0
rover	3.097	1.879e-10	2.884	2.903e-10	7.9	7.3	9.7	6.5	4.6	10.1	17	5.4	1	0.8	1.1	1.2
Tc1	1.428	4.322e-05	1.471	3.896e-06	1.2	1.1	1.2	1.3	1.3	1.3	1.2	1.1	0.4	0.4	0.3	0.5
Rt1b	0.9648	0.005174	3.37	3.761e-23	1.6	2	2.3	2	0.3	0.6	0.6	0.3	0.2	0.2	0.2	0.2
Doc2-element	0.5188	0.02026	2.527	6.902e-24	1.5	2	2.9	2.2	0.4	0.8	1	0.5	0.3	0.3	0.3	0.6
invader2	3.275	4.19e-20	4.875	2.601e-46	24.2	22.8	23.6	20.9	3.7	10.9	9.6	5.6	0.6	0.8	0.6	1
G6	0.04919	0.6675	5.515	4.031e-18	2.4	2.3	2.7	3	0.1	0	0.1	0.1	0	0.1	0.1	0
R1A1-element	0.01222	0.9545	3.626	1.227e-08	1.8	3.6	3	2.7	0.1	0.2	0.4	0.3	0.3	0.2	0.1	0.3
accord	3.077	0.0001551	6.625	2.56e-21	4.6	9.3	8.4	6.9	0.4	0.5	1	0.6	0	0.1	0	0.1
Burdock	5.993	9.301e-139	4.737	2.817e-87	38.6	28.6	35	26	61.3	88.1	90.5	65.3	1.3	0.9	1	1.5
gypsy7	1.59	0.01076	4.494	1.527e-08	0.2	0.3	0.5	0.5	0.1	0.1	0.1	0.1	0	0	0	0
Osvaldo	0.03873	0.7462	3.694	0.0006896	0.2	0.3	0.2	0.3	0.1	0	0	0	0	0	0	0
BS3	0.04125	0.7228	3.091	0.0003273	0.1	0.3	0.1	0.2	0	0.1	0	0	0	0	0.1	0
Rt1c	0.1049	0.3892	2.985	1.26e-06	0.1	0.2	0.1	0.1	0	0	0	0	0	0	0	0
aurora-element	-0.002131	1	4.417	2.963e-22	1.2	1.6	1.9	1.8	0	0.1	0.1	0.1	0	0.1	0.1	0
invader3	1.568	3.856e-10	3.576	2.837e-52	2.4	3.3	4.4	3	0.4	1.3	1.2	0.6	0.3	0.2	0.2	0.3
HB	0.02027	0.9054	1.499	0.002405	0.4	0.5	0.6	0.7	0.1	0.2	0.3	0.2	0	0.1	0.1	0.4
R2-element	0.04758	0.6772	4.166	6.361e-13	0.9	1.4	1.6	1.3	0.1	0.1	0.2	0.1	0.1	0.1	0	0.1
diver	5.224	1.285e-68	4.262	1.197e-46	43.5	36.2	43.6	35	35.6	105.7	137	28.6	1.8	2	2.4	1.9
Tom1	0.05558	0.6137	0.4074	0.05145	5.8	7.3	8.2	6.2	6.7	6.6	5.6	5.2	4.4	5.2	5.3	4.9
transib2	0.3972	0.08287	2.583	1.825e-07	0.2	0.4	0.5	0.4	0.1	0.2	0.2	0.1	0.1	0	0	0.1
TART	7.24	1.253e-120	7.1	5.953e-117	41.2	29.5	29.5	26.2	32.5	41.1	24.8	38.6	0.2	0.2	0.3	0.2
diver2	3.283	1.465e-05	5.07	9.407e-15	0.4	0.5	0.7	0.7	0.1	0.2	0.2	0.2	0	0	0	0
1731	0.194	0.1367	3.523	6.432e-61	26.5	28.8	51.8	35.4	3.5	5.3	5.6	3.4	2.4	2.9	2.4	4.5
accord2	0.06753	0.5396	0.7458	0.02359	0.2	0.1	0.2	0.1	0.1	0.1	0.1	0.1	0.1	0.1	0.1	0.1
G3	0.1005	0.4042	0.9495	0.07249	0	0.1	0.1	0	0	0	0	0	0	0	0	0
gypsy6	1.979	2.162e-05	3.662	4.176e-18	0.2	0.2	0.3	0.3	0	0.1	0.1	0.1	0	0	0	0
hopper	0.1762	0.2164	2.936	1.956e-15	1	1.5	1.6	1.2	0.3	0.3	0.3	0.4	0.2	0.1	0.1	0.3
Dm88	2.388	1.227e-12	3.573	6.394e-29	2.8	3.6	4.6	3.6	1	2.7	1.7	1.3	0.2	0.3	0.3	0.3
Bari1	1.775	4.498e-06	3.32	7.541e-20	16.7	16.4	23.4	19.8	5.7	7.5	8.4	7.1	1.8	1.7	1.6	2.4
G5	1.433	2.105e-05	2.882	1.261e-20	0.8	0.9	1	1	0.2	0.4	0.5	0.4	0.1	0.1	0.1	0.2
Fw3	-0.02895	0.8296	0.5811	0.1524	0	0.1	0.1	0.1	0	0	0	0	0	0	0	0
gypsy9	0.003622	1	2.704	4.195e-06	0.9	0.9	0.9	1.1	0	0.2	0.2	0.1	0.1	0.1	0.1	0.2
G-element	0.05541	0.6133	4.441	3.526e-05	0.6	0.9	1.3	0.5	0	0.1	0.1	0	0	0	0	0
gypsy8	0.03439	0.7844	2.942	0.00103	0.1	0.1	0.2	0.2	0	0	0	0	0	0	0	0
gypsy12	6.45	4.092e-58	8.442	8.103e-102	6.2	8	8.7	7	0.6	2.4	1.9	2.2	0	0	0	0
frogger	0.02404	0.8723	0.4917	0.2313	0.1	0.1	0.1	0.1	0.1	0	0.1	0.1	0	0.1	0	0.1
HMS-Beagle	5.046	1.476e-55	5.184	8.044e-60	30.5	40.1	67.3	51.6	28.5	37.9	66.3	37.3	1.3	1	1	1.7
Stalker3	0.2092	1	3.369	0.003723	1.1	1	0.3	2.2	0.1	1.3	0.4	0.3	0.1	0.1	0	0.1
Tc3	0.07488	0.5031	2.111	3.2e-07	0.4	0.2	0.5	0.6	0.1	0.2	0.3	0.1	0.1	0	0.1	0.1
springer	1.46	5.108e-07	2.31	6.408e-17	23.2	18.3	23	25.9	6.4	15.4	21.4	10.6	2.9	6	5.5	3.6
Doc4-element	0.09826	0.421	3.062	0.007262	0.1	0	0	0.1	0	0	0	0	0	0	0	0
Circe	2.358	2.807e-07	6.957	2.18e-67	1.8	2.5	2.9	2.3	0	0.2	0.1	0.1	0	0	0	0
S-element	0.7061	0.01881	2.613	8.581e-14	1	1	1.8	1.3	0.5	0.5	0.5	0.4	0.2	0.2	0.2	0.3
looper1	0.1158	1	3.237	0.002089	0.4	0.3	0.5	0.3	0.1	0.1	0.1	0.2	0	0	0	0.1
Transpac	6.727	4.182e-164	6.137	4.502e-137	63.7	41.5	52.2	44.5	50.8	98.4	99.7	52.7	0.6	0.6	0.6	0.9
transib3	1.24	0.001501	3.652	4.769e-25	0.8	1.3	1.4	1	0.3	0.3	0.2	0.2	0.1	0.1	0	0.1
Tc1-2	1.451	0.0002157	2.095	1.322e-08	1.7	1.8	2.1	1.6	0.8	1.7	1.8	0.9	0.3	0.4	0.4	0.5
transib4	0.3498	0.1156	2.503	0.003103	0	0.1	0.1	0.1	0.1	0.1	0.1	0	0	0	0	0
invader1	1.818	2.715e-07	5.539	1.309e-67	3.2	4.4	5.6	5	0.2	0.4	0.5	0.4	0	0.1	0	0.2
HeT-A	9.932	4.675e-99	9.257	5.175e-88	513.9	383.2	349.1	346.3	557.5	580.1	546.8	724.9	0.5	0.5	0.6	0.6
3S18	5.255	3.69e-106	5.125	1.231e-101	267.1	207.3	242	168	151.5	316.8	340.9	152.5	5.6	4.6	4	10.6
hobo	0.01507	0.945	2.084	5.894e-13	4.4	4.5	6.8	6.6	1.3	1.8	1.4	1.1	1.1	1	1.1	2
TAHRE	8.005	4.866e-116	7.62	2.306e-106	107	76.9	76.8	79.6	120.5	94.8	92.3	126.3	0.4	0.5	0.3	0.4
hopper2	0.01077	1	0.4907	0.4392	0	0	0	0	0	0	0	0	0	0	0	0
Tirant	0.06454	0.563	1.214	0.01687	27.3	15.2	24	21.7	8	10.2	18.8	14.5	6.1	6	4.1	10.7
S2	0.05476	0.6215	1.818	0.00605	0.1	0.3	0.2	0.2	0.1	0	0.2	0.1	0	0	0	0.1
jockey2	0.0329	0.797	1.243	0.01095	0.1	0.2	0.1	0.1	0	0.1	0.1	0	0	0	0	0.1
pogo	3.205	3.99e-59	3.593	4.048e-75	11.4	11.6	16.5	11.5	7.4	13.8	11.1	6.7	1.2	0.7	0.9	1.4
INE-1	0.04866	0.6692	-0.1312	0.7087	0.7	1.1	0.4	0.4	0.5	1.4	1.3	1	0.9	0.8	0.3	0.8
mariner2	0.03631	0.7731	2.252	6.619e-06	0.5	0.8	0.9	0.8	0.2	0.2	0.2	0.3	0.1	0.1	0.2	0.2
invader5	0.008117	1	-0.03994	0.9665	0	0	0	0	0	0	0	0	0	0	0	0
Penelope	0	1	0	1	0	0	0	0	0	0	0	0	0	0	0	0
Bari2	0.01144	0.9575	0.8707	0.04393	0.2	0.3	0.3	0.3	0.1	0.1	0.2	0.1	0.1	0.1	0.1	0.1
Helitron	0	1	0	1	0	0	0	0	0	0	0	0	0	0	0	0
R1-2	-0.00141	1	1.2	0.148	0	0	0	0	0	0	0	0	0	0	0	0
G7	0.003932	1	0.4997	1	0.1	0.1	0.1	0.2	0	0	0	0	0	0	0	0
ISBU3	0	1	0	1	0	0	0	0	0	0	0	0	0	0	0	0
