# Supplementary material for: Dimerisation of the PICTS complex via LC8/Cut-up drives co-transcriptional transposon silencing in Drosophila
Source: eLife. 2021 Feb 4;10:e65557. doi: 10.7554/eLife.65557 (PMC7861614; doi:10.7554/eLife.65557)
Supplement: Figure 2—figure supplement 1—source data 1. [file elife-65557-fig2-figsupp1-data1.xlsx]

## Sheet: Genes
				Log2FC and padj reported by DESeq2		Log2 fold change and adjusted p-value reported by DESeq2 (re-analyzed from Fabry et al., 2019)						RPKM per sample								RPKM per sample (re-analyzed from Fabry et al., 2019)
EnsemblID	Symbol	Hsap_symbol	Biotype	log2FC [si_ctp/si_gfp]	padj [si_ctp/si_gfp]	log2FC [siNxf2/siGFP]	padj [siNxf2/siGFP]	log2FC [siPanx/siGFP]	padj [siPanx/siGFP]	log2FC [siPiwi/siGFP]	padj [siPiwi/siGFP]	si_ctp.1	si_ctp.2	si_ctp.3	si_ctp.4	si_gfp.1	si_gfp.2	si_gfp.3	si_gfp.4	siGFP.1	siGFP.2	siGFP.3	siNxf2.1	siNxf2.2	siNxf2.3	siPanx.1	siPanx.2	siPanx.3	siPiwi.1	siPiwi.2	siPiwi.3
FBgn0265512	mlt	TBCEL,AP000646.1	protein_coding	6	3.691e-130	2.979	1.455e-22	3.188	4.366e-26	3.794	2.427e-37	48.275	33.119	35.173	36.116	0.738	0.594	0.617	0.378	0.908	2.013	0.715	9.832	9.397	9.894	11.603	11.67	10.579	19.064	24.022	8.889
FBgn0261547	Exn		protein_coding	-2.679	2.855e-123	-1.48	3.892e-27	-1.499	2.174e-27	-1.728	1.846e-34	1.189	1.387	1.314	1.371	9.557	7.674	8.098	8.73	7.421	7.249	7.293	2.431	2.951	2.407	2.37	2.484	2.756	2.601	1.925	2.162
FBgn0036150	Ir68a		protein_coding	5.71	3.232e-123	4.181	8.797e-46	4.581	1.973e-55	5.053	2.308e-67	86.921	78.121	75.387	80.9	1.392	1.846	1.408	1.356	1.95	2.146	1.955	41.723	35.843	35.912	61.679	50.981	38.033	93.597	85.329	31.296
FBgn0034390	CG15093		protein_coding	-6.005	7.013e-123	-0.8804	3.525e-06	-0.834	6.806e-06	-1.269	2.818e-12	0.26	0.651	0.454	0.623	38.728	35.213	31.934	29.723	44.726	39.455	45.077	19.098	25.342	24.143	21.593	25.272	22.947	21.336	14.675	17.481
FBgn0013771	Cyp6a9		protein_coding	5.749	2.626e-122	2.737	1.423e-20	3.116	9.032e-27	2.69	2.549e-20	98.54	133.302	87.264	90.05	2.032	2.391	1.215	1.78	3.881	4.636	6.562	31.218	23.735	49.894	36.838	43.363	56.41	42.965	34.892	25.746
FBgn0005564	Shal	KCND3	protein_coding	5.441	2.159e-119	4.303	1.159e-51	4.611	1.236e-59	4.378	7.881e-54	24.364	25.388	25.42	27.588	0.462	0.818	0.571	0.463	0.853	1.078	0.803	19.112	18.157	18.187	24.841	23.62	20.59	24.331	23.651	11.084
FBgn0085440	Lgr4		protein_coding	6.167	1.282e-104	4.949	1.149e-47	5.395	5.325e-57	5.4	3.962e-57	54.149	57.527	56.926	56.578	0.528	0.8	0.775	0.94	1.721	0.896	1.036	40.232	39.893	36.909	63.754	58.701	38.357	66.212	72.18	23.052
FBgn0052944	CG32944		protein_coding	4.971	6.002e-103	4.859	3.892e-54	4.916	6.756e-56	5.205	1.086e-62	8.689	9.95	8.661	8.246	0.247	0.38	0.319	0.162	0.45	0.261	0.34	9.436	10.42	11.283	9.937	13.218	9.445	15.762	15.323	9.271
FBgn0037396	CG11459		protein_coding	5.95	3.934e-101	2.39	7.302e-12	2.234	1.923e-10	3.884	4.542e-32	63.813	57.242	54.177	37.367	0.37	1.05	0.888	1.042	1.854	3.385	1.127	10.711	11.625	11.989	8.341	10.887	11.709	35.982	36.096	24.678
FBgn0265929	CR44718		ncRNA	5.624	7.732e-98	4.308	1.209e-36	4.656	3.209e-43	5.279	5.136e-56	38.129	54.752	53.217	61.158	0.934	1.323	0.902	0.919	1.487	1.313	1.512	31.686	32.814	25.302	50.629	33.046	31.758	74.799	72.913	31.433
FBgn0031281	Saf6		protein_coding	-2.611	8.678e-97	-1.563	3.085e-25	-1.512	1.271e-23	-1.969	5.826e-39	19.806	22.582	19.298	22.4	166.936	115.532	116.418	119.242	101.392	89.037	101.168	27.679	30.786	38.501	34.899	32.55	33.506	22.476	19.703	30.534
FBgn0031098	CG17068		protein_coding	2.089	3.126e-95	2.367	1.85e-61	2.514	4.464e-70	2.519	2.331e-69	18.435	20.778	19.944	20.356	5.109	3.628	5.041	4.863	2.822	2.213	3.54	14.085	16.489	15.235	17.905	13.876	18.936	19.116	16.107	16.446
FBgn0037369	CG2100	TRNT1	protein_coding	-2.259	7.763e-83	-0.0385	0.8534	-0.1233	0.3644	-0.2965	0.02329	6.025	5.997	5.026	4.049	24.599	24.648	25.739	26.501	25.876	32.134	24.404	28.818	27.162	21.897	23.73	25.354	22.014	19.502	20.309	22.599
FBgn0017545	RpS3A	RPS3A	protein_coding	-1.061	1.557e-81	-0.1172	0.1846	-0.02161	0.8235	-0.2836	5.229e-05	660.007	805.251	721.406	762.788	1588.4	1538.88	1549.8	1503.45	1805.82	1768.54	1655.23	1584.1	1485.49	1638.8	1667.02	1819.5	1609.31	1383.05	1442.04	1405.93
FBgn0033980	Cyp6a20		protein_coding	6.956	1.598e-81	1.895	0.0006639	2.321	1.295e-05	3.453	1.365e-12	29.5	20.075	23.99	16.733	0.163	0.257	0.09	0.163	0.397	0.409	0.143	0.772	1.092	1.769	1.107	1.162	2.42	5.764	2.614	2.713
FBgn0040370	CG13375		protein_coding	7.42	5.863e-81	3.32	2.298e-12	3.158	2.532e-11	3.519	2.009e-14	12.191	10.58	12.286	13.323	0.04	0.069	0.066	0.09	0.341	0.131	0.126	2.303	1.796	1.921	1.778	1.005	2.625	3.099	2.912	1.21
FBgn0039704	neo		protein_coding	5.756	2.541e-74	3.593	4.983e-21	3.78	1.495e-23	4.425	1.922e-32	41.849	43.904	38.831	37.899	0.74	0.627	0.727	0.808	2.18	1.989	0.478	22.099	19.208	15.981	25.705	21.092	18.999	43.671	42.824	17.355
FBgn0022774	Oat	OAT	protein_coding	3.411	6.393e-68	2.527	3.892e-27	2.489	1.498e-26	1.934	2.428e-16	223.893	221.826	322.806	300.903	23.95	25.854	24.016	25.181	34.909	39.52	25.657	171.105	207.997	210.348	178.668	182.596	214.985	137.441	139.49	117.946
FBgn0261999	CG42817		protein_coding	5.508	1.013e-66	3.66	4.415e-21	3.746	2.46e-22	3.973	2.863e-25	11.394	8.767	13.499	13.016	0.235	0.322	0.235	0.195	0.529	0.629	0.342	6.044	6.939	6.654	7.159	7.131	6.741	10.464	10.416	4.05
FBgn0032136	Apoltp		protein_coding	9.614	2.634e-62	5.323	1.432e-21	5.964	2.695e-27	5.433	8.693e-23	14.148	12.899	6.055	8.746	0.007	0.014	0.012	0.011	0.348	0.738	0.031	18.074	16.878	16.498	33.477	22.795	26.214	22.845	22.467	10.738
FBgn0040005	CG17883	TBC1D20	protein_coding	-2.546	3.959e-60	-1.305	1.341e-11	-0.7812	6.352e-05	-0.1129	0.5509	11.91	15.999	9.91	10.165	70.23	80.461	66.082	67.252	51.604	55.947	73.295	26.751	19.692	25.487	35.833	39.265	24.928	53.238	57.526	48.891
FBgn0036110	Cpr67Fb		protein_coding	5.089	9.192e-59	2.173	1.258e-07	2.035	8.154e-07	4.279	6.536e-30	120.356	90.414	98.121	79.817	2.004	2.028	3.63	3.463	3.648	5.031	6.742	17.235	18.224	40.81	13.094	19.928	36.364	113.583	115.324	99.286
FBgn0011589	Elk		protein_coding	7.218	2.401e-56	4.487	3.156e-16	4.593	3.42e-17	5.853	3.77e-28	31.935	28.713	24.288	22.539	0.141	0.225	0.113	0.179	0.289	0.687	0.173	12.18	11.003	5.518	11.792	11.293	8.199	33.181	38.664	4.702
FBgn0264502	CG43901		protein_coding	5.291	2.971e-56	0.05772	0.628	0.04854	0.7514	0.243	0.2117	7.338	6.97	7.214	5.728	0.105	0.153	0.247	0.168	0.601	0.295	0.194	0.48	0.505	0.536	0.458	0.37	0.495	1.033	0.558	0.296
FBgn0083979	Ir10a		protein_coding	6.596	1.423e-55	3.119	1.015e-09	2.966	5.366e-09	2.473	9.113e-07	54.144	83.955	50.677	57.129	0.636	0.55	0.675	0.511	3.972	3.579	0.742	30.304	33.821	13.261	29.532	23.465	17.9	22.047	21.372	8.826
FBgn0032981	CG3635		protein_coding	2.627	1.949e-55	3.156	3.337e-53	3.033	2.029e-49	3.408	1.333e-62	98.029	115.794	132.751	151.75	26.623	15.639	16.289	20.973	7.588	12.653	9.482	97.628	88.954	83.223	72.609	82.165	93.381	105.436	108.239	109.136
FBgn0035799	CG14838		protein_coding	5.137	6.502e-55	3.637	1.249e-18	4.055	1.495e-23	3.259	1.865e-15	26.595	28.685	34.255	42.26	1.332	1.003	0.588	0.681	0.576	0.943	0.994	8.751	8.728	16.042	13.94	11.704	19.664	10.611	8.937	7.042
FBgn0034725	CG6044		protein_coding	-4.353	7.591e-54	-1.586	8.608e-06	-2.356	3.725e-12	-2.979	5.448e-19	2.783	4.948	4.229	5.017	89.439	38.004	112.166	117.982	68.915	70.201	66.176	21.782	25.908	16.464	12.732	10.877	14.218	8.701	5.937	9.87
FBgn0050076	CG30076		protein_coding	3.333	3.999e-53	2.906	3.596e-26	3.113	3.214e-30	3.008	2.179e-28	16.386	20.864	19.586	20.355	2.003	1.808	1.571	2.133	2.995	2.062	1.881	15.283	20.238	16.74	16.556	21.801	22.049	19.502	22.666	14.858
FBgn0022981	rpk		protein_coding	-2.615	5.179e-53	-0.05088	0.7607	0.1361	0.348	0.2228	0.18	1.074	1.641	1.133	1.436	10.357	8.309	6.589	7.895	5.4	7.289	5.71	7.125	4.105	5.27	7.508	8.298	7.077	8.502	7.426	7.778
FBgn0035608	blanks		protein_coding	8.562	5.295e-53	5.285	8.361e-10	5.549	5.045e-11	7.461	7.011e-20	58.352	34.168	28.017	24.41	0.129	0.073	0.064	0.058	0.094	0.218	0	6.09	3.923	4.351	5.148	4.174	8.388	30.86	33.313	5.683
FBgn0260480	CG32295		protein_coding	5.226	2.154e-51	4.834	1.919e-25	4.644	1.277e-23	5.6	1.176e-34	30.434	39.433	33.566	37.295	0.919	1.394	0.516	0.752	0.811	0.548	0.787	26.944	21.461	19.179	26.697	12.674	20.178	45.536	55.093	16.579
FBgn0036752	Adgf-A	ADA2	protein_coding	5.915	2.464e-50	1.447	0.004052	1.581	0.001872	2.52	2.105e-07	72.083	58.476	68.655	59.216	0.796	1.361	0.829	1.052	3.451	2.274	1.071	10.682	8.403	4.084	7.637	11.08	5.594	20.057	19.455	4.483
FBgn0051619	nolo		protein_coding	-3.28	3.419e-50	-1.893	8.643e-13	-1.977	6.597e-14	-1.327	1.022e-06	1.897	1.856	1.367	1.377	18.065	16.211	14.621	15.355	17.998	21.101	16.066	4.366	4.836	5.06	5.562	3.269	4.683	8.849	7.597	4.824
FBgn0033486	dmpd		protein_coding	4.542	4.209e-50	3.942	1.451e-26	4.024	8.32e-28	4.079	6.69e-29	36.49	28.754	37.6	37.749	1.536	1.414	1.546	1.362	1.659	2.598	1.553	36.689	37.699	19.141	40.551	38.444	20.75	47.772	44.703	12.053
FBgn0032956	Cul2	CUL2	protein_coding	1.732	5.894e-50	0.1293	0.2913	0.00622	0.9812	0.02753	0.901	199.166	204.472	139.244	141.453	46.87	52.126	51.996	53.388	54.99	54.87	51.154	74.469	64.589	56.456	53.138	55.428	53.875	61.148	55.273	49.393
FBgn0041630	Hexo1	HEXB	protein_coding	-4.399	2.244e-49	-0.06303	0.6317	-0.1534	0.2849	-0.522	0.01643	0.424	0.839	0.336	0.227	12.279	11.221	8.765	8.139	16.643	14.725	13.191	11.246	15.8	7.732	10.825	12.023	8.017	10.474	8.991	5.137
FBgn0053547	Rim		protein_coding	5.928	4.625e-49	3.122	7.627e-13	3.558	4.86e-17	5.137	1.527e-36	0.997	1.354	0.813	0.845	0.011	0.037	0.003	0.008	0.084	0.11	0.029	0.661	0.43	0.818	0.789	0.682	1.124	2.726	3.366	1.833
FBgn0038680	Cyp12a5		protein_coding	-4.518	1.322e-48	-0.0288	0.8766	-0.09687	0.5153	0.009375	0.9764	0.608	0.689	0.272	0.414	13.354	12.495	8.981	11.445	6.936	6.822	10.975	6.704	5.529	9.521	5.38	5.883	7.467	10.823	9.198	5.805
FBgn0000566	Eip55E	CTH	protein_coding	-2.124	5.087e-48	-0.08032	0.5772	-0.2256	0.09977	-0.6619	5.963e-05	9.217	14.114	8.582	6.712	39.505	36.646	49.409	45.542	48.183	44.926	38.668	36.885	39.914	35.49	28.831	35.972	33.232	19.811	24.51	30.245
FBgn0035333	CG1317	MARCH6	protein_coding	5.868	1.032e-47	4.863	4.376e-24	4.925	6.3e-25	4.801	8.082e-24	39.558	27.778	33.077	30.94	0.567	0.512	0.521	0.519	1.209	1.138	0.572	43.235	36.305	13.349	40.439	41.003	16.381	35.844	47.714	6.364
FBgn0267794	CR43174		ncRNA	7.887	1.137e-46	4.16	3.82e-12	4.04	1.434e-11	5.173	1.397e-19	14.095	15.662	12.922	10.687	0.017	0.129	0	0.038	0.248	0.335	0.027	3.055	2.951	4.652	2.926	2.242	4.729	6.79	10.824	4.896
FBgn0266452	CTPsyn	CTPS1,CTPS2	protein_coding	-1.096	3.474e-46	-0.813	2.434e-17	-0.7894	1.54e-16	-0.9561	7.907e-24	27.715	28.271	26.919	27.553	52.979	58.986	63.856	62.063	66.982	64.372	56.066	33.072	37.309	35.516	37.092	37.254	33.342	34.132	32.716	29.424
FBgn0004583	ex		protein_coding	3.049	5.249e-46	3.204	1.209e-36	3.187	2.235e-36	3.515	1.541e-44	51.428	63.087	56.47	56.882	6.339	9.461	5.373	5.792	5.444	5.183	7.173	61.571	58.392	48.126	66.176	48.457	52.206	85.459	87.557	37.298
FBgn0262886	CR43241		ncRNA	-3.131	6.264e-46	1.747e-06	1	0.08376	0.6027	0.1284	0.5148	2.386	3.815	2.182	1.257	23.739	27.093	17.981	18.42	23.722	20.99	28.99	26.899	21.421	25.67	24.685	31.168	32.161	36.505	31.942	20.967
FBgn0029728	CG2861		protein_coding	7.535	1.658e-45	0.4225	0.1088	0.09766	0.4846	5.109	6.74e-16	22.521	14.764	7.83	5.583	0.048	0.09	0.066	0.036	0.194	0.12	0.083	0.603	0.376	0.303	0.324	0.14	0.276	7.141	8.483	0.625
FBgn0030246	CG1582	DHX57	protein_coding	4.522	1.303e-43	0.07124	0.5344	0.09791	0.4838	0.9911	0.004281	2.93	1.962	1.857	1.184	0.054	0.066	0.124	0.095	0.225	0.347	0.278	0.4	0.327	0.531	0.513	0.377	0.4	0.69	1.202	0.389
FBgn0001134	Grd		protein_coding	5.854	1.909e-43	5.279	5.34e-23	5.381	3.938e-24	5.491	3.68e-25	12.653	10.162	15.275	14.928	0.193	0.357	0.159	0.145	0.41	0.226	0.076	12.822	10.883	5.688	11.492	12.969	7.42	13.927	15.195	5.31
FBgn0037832	Desi		protein_coding	6.357	2.301e-42	4.312	2.127e-16	4.912	1.012e-21	5.717	1.519e-29	39.48	23.8	10.797	13.868	0.163	0.215	0.403	0.22	1.185	1.464	0.255	21.053	17.61	21.341	23.455	45.309	24.105	59.33	64.152	40.834
FBgn0264566	CG43938		protein_coding	6.27	2.927e-42	4.981	4.199e-18	5.022	1.374e-18	5.479	2.58e-22	25.325	20.854	21.573	23.068	0.374	0.333	0.245	0.124	0.16	0.681	0.415	19.123	18.682	9.361	15.253	21.036	12.724	31.527	31.066	5.589
FBgn0000116	Argk	CKMT1B,CKM,CKMT2,CKMT1A,CKB	protein_coding	-2.991	4.415e-42	-1.1	0.0001808	-1.764	5.508e-11	-2.443	4.415e-21	40.895	52.792	50.892	44.525	352.672	203.088	497.807	484.251	444.163	328.189	310.878	143.595	180.245	157.081	82.28	75.689	148.035	50.215	45.645	95.088
FBgn0038964	Nop56		protein_coding	-1.028	1.078e-41	-0.3632	1.74e-05	-0.4219	1.371e-06	-0.5466	8.961e-10	128.691	118.555	118.308	105.392	222.34	231.958	261.171	252.137	321.112	306.772	262.156	211.666	233.268	206.245	201.993	228.941	201.654	198.652	190.998	199.678
FBgn0035287	CG13937		protein_coding	-3.864	1.116e-41	-1.453	8.953e-05	-0.8997	0.005727	-2.884	1.763e-17	2.852	6.042	3.394	5.085	77.327	57.221	62.973	63.65	55.554	63.642	75.38	21.621	22.672	21.992	38.169	29.168	18.576	12.511	7.062	5.771
FBgn0261811	pico		protein_coding	1.139	9.452e-41	0.9962	1.132e-21	1.08	1.328e-25	0.9587	1.597e-20	54.752	51.659	53.821	57.102	22.979	25.512	24.255	25.117	21.131	20.591	21.966	45.516	41.864	40.461	47.767	43.004	44.728	43.52	48.599	33.404
FBgn0266046	CR44811		ncRNA	5.448	1.274e-40	1.24	0.01107	2.42	7.194e-06	4.137	8.352e-17	33.131	45.542	29.665	28.663	0.611	1.054	0.69	0.598	0.484	1.419	1.543	2.886	2.161	6.944	4.714	6.398	10.44	30.274	29.215	11.212
FBgn0034758	CG13510		protein_coding	3.067	6.061e-40	2.288	5.473e-14	2.284	5.768e-14	2.829	7.935e-22	6.377	6.908	11.267	12.059	0.914	1.475	0.895	0.971	0.601	1.784	1.235	6.173	6.733	5.941	7.247	6.399	5.331	9.916	8.678	8.981
FBgn0034759	CG13511		protein_coding	3.067	6.061e-40	2.288	5.473e-14	2.284	5.768e-14	2.829	7.935e-22	6.377	6.908	11.267	12.059	0.914	1.475	0.895	0.971	0.601	1.784	1.235	6.173	6.733	5.941	7.247	6.399	5.331	9.916	8.678	8.981
FBgn0260767	CG42565		protein_coding	3.067	6.061e-40	2.288	5.473e-14	2.284	5.768e-14	2.829	7.935e-22	6.377	6.908	11.267	12.059	0.914	1.475	0.895	0.971	0.601	1.784	1.235	6.173	6.733	5.941	7.247	6.399	5.331	9.916	8.678	8.981
FBgn0051973	Cda5		protein_coding	6.121	9.624e-40	4.303	1.096e-14	4.215	3.208e-14	5.042	1.112e-20	36.864	32.843	45.357	44.075	0.352	0.555	0.592	0.61	1.434	1.9	0.352	36.703	32.656	12.146	34.894	28.644	14.008	61.239	64.849	14.004
FBgn0029532	CG13361		protein_coding	4.662	6.391e-39	3.168	3.307e-09	3.675	1.272e-12	2.252	3.452e-05	8.215	7.85	13.392	14.723	0.418	0.415	0.543	0.306	0.228	0.294	0.459	3.158	3.104	4.022	3.244	5.819	5.616	2.892	2.089	1.288
FBgn0046253	CG3502		protein_coding	4.887	2.476e-38	3.977	3.379e-17	4.032	7.474e-18	3.505	1.06e-13	3.303	4.159	5.875	7.147	0.113	0.253	0.115	0.174	0.526	0.174	0.227	4.042	4.304	6.543	5.718	3.105	6.848	4.617	4.619	2.003
FBgn0033015	d4		protein_coding	1.763	4.929e-38	0.1813	0.1161	0.06367	0.7069	0.2988	0.04524	230.267	243.688	199.982	203.02	70.092	67.925	55.338	62.315	54.773	60.282	59.47	83.149	78.7	70.999	64.958	65.545	62.485	59.89	65.633	107.332
FBgn0032026	CG7627		protein_coding	-1.512	7.31e-38	-0.1087	0.3996	-0.2216	0.08336	-0.2399	0.08365	14.773	16.886	22.493	19.841	60.512	48.447	49.163	55.096	59.095	52.105	54.025	47.643	44.013	48.174	43.111	35.494	50.471	41.004	40.782	50.166
FBgn0028888	CG4168		protein_coding	2.64	1.314e-37	1.463	2.542e-08	1.627	2.697e-10	2.641	3.016e-27	31.439	33.658	27.056	28.861	6.472	5.626	3.267	3.62	3.741	3.933	6.74	13.361	12.861	15.248	16.582	13.481	16.4	35.113	34.286	24.377
FBgn0034389	Mctp		protein_coding	-4.447	6.529e-37	-0.1714	0.1869	-0.9902	0.003269	-1.171	0.0004643	0.122	0.174	0.101	0.09	2.518	3.11	2.949	2.562	5.641	5.464	3.365	3.437	3.047	2.237	1.962	2.186	2.051	2.772	2.296	0.848
FBgn0263934	esn	PRICKLE2	protein_coding	4.96	1.067e-36	3.21	1.043e-09	3.529	6.006e-12	3.966	1.733e-15	2.018	2.126	1.803	1.97	0.038	0.041	0.068	0.098	0.199	0.153	0	0.851	0.869	1.284	1.725	1.027	1.109	1.555	2.335	1.345
FBgn0037796	CG12814		protein_coding	5.142	6.868e-36	3.244	1.273e-10	2.29	1.018e-05	2.082	3.767e-05	57.668	37.203	29.231	36.087	1.357	0.666	1.049	1.218	2.898	4.439	0.819	36.407	37.512	9.454	16.201	16.347	12.344	15.502	17.371	6.918
FBgn0260943	Rbp6	MSI2	protein_coding	4.533	1.04e-35	1.5	0.001276	1.112	0.006923	2.085	1.655e-06	2.666	1.907	1.843	2.34	0.111	0.101	0.06	0.09	0.519	0.559	0.224	1.988	1.4	0.831	1.161	1.513	0.922	3.034	2.253	0.853
FBgn0262620	CR43144		ncRNA	2.832	1.302e-35	0.05385	0.7034	0.08685	0.5716	0.1531	0.4307	248.548	217.499	124.437	130.75	29.663	27.693	20.905	20.374	24.696	23.598	31.225	36.642	33.95	27.997	26.131	41.961	31.932	27.134	35.625	38.101
FBgn0000635	Fas2		protein_coding	3.141	3.023e-35	1.568	1.166e-06	1.98	1.646e-10	0.6912	0.005544	91.472	119.795	161.659	183.088	13.942	20.388	13.772	13.208	22.787	23.615	25.949	68.214	64.328	93.898	107.068	96.303	97.243	62.558	61.003	22.518
FBgn0034997	CG3376	SMPD1	protein_coding	5.694	5.795e-35	2.342	7.183e-06	2.408	2.731e-06	3.654	2.378e-14	3.31	2.819	3.595	3.218	0.057	0.077	0.07	0.027	0.649	0.387	0.153	2.945	2.378	1.135	1.886	3.109	1.756	6.856	7.708	1.376
FBgn0266769	CR45234		ncRNA	7.127	1.204e-34	3.36	1.228e-05	3.055	6.368e-05	5.081	2.87e-13	52.921	34.001	53.194	47.685	0.301	0.122	0.319	0.435	0.626	1.209	0.067	6.697	8.056	7.25	5.004	3.396	9.997	31.131	40.728	4.975
FBgn0020414	Idgf3		protein_coding	2.994	1.982e-34	0.2317	0.1067	-0.001705	1	0.3025	0.107	31.396	21.357	31.954	29.597	2.978	4.165	3.735	3.081	13.071	9.723	5.935	16.756	18.226	13.128	6.466	9.431	12.422	14.609	15.81	14.039
FBgn0011586	e(r)	ERH	protein_coding	-0.8366	4.265e-34	-0.5202	5.177e-10	-0.4123	2.671e-07	-0.7435	1.233e-19	126.883	125.228	132.755	146.107	261.76	236.792	227.688	229.519	236.762	249.901	245.635	174.211	174.71	151.226	187.238	189.092	153.148	148.165	141.32	140.67
FBgn0030608	Lsd-2		protein_coding	-1.59	4.94e-34	0.01948	0.9469	-0.0198	0.9233	-0.3017	0.03674	6.092	9.084	5.938	6.267	19.535	17.108	24.752	22.147	20.564	19.382	19.934	18.574	23.422	20.095	18.929	17.478	21.525	16.152	16.525	12.471
FBgn0263581	CR43606		ncRNA	5.994	5.733e-34	4.533	4.913e-11	4.673	6.493e-12	5.52	5.754e-17	16.883	12.439	12.06	13.425	0.203	0.192	0.189	0.2	0.185	0.215	0.24	6.365	7.376	4.592	5.217	9.761	5.571	18.629	16.271	3.419
FBgn0015527	peng		protein_coding	-0.8137	1.394e-33	-0.3089	5.73e-05	-0.1708	0.0775	-0.3845	4.662e-06	55	56.437	53.191	48.274	90.213	93.801	97.513	95.683	94.284	85.596	86.189	58.917	73.011	70.454	76.529	80.591	72.736	65.226	70.444	62.797
FBgn0036373	Tgi		protein_coding	2.013	4.594e-33	0.9952	9.496e-06	1.33	3.289e-10	1.31	4.212e-10	84.722	72.59	54.924	59.726	15.451	23.657	13.419	13.74	17.588	17.339	14.68	35.169	36.458	29.654	48.997	44.374	34.34	49.417	45.858	31.088
FBgn0020251	sfl		protein_coding	-1.338	8.982e-33	-0.1326	0.269	-0.1914	0.1356	-0.6037	2.805e-06	11.063	15.108	13.658	15.054	33.923	39.521	33.119	33.761	35.487	38.48	50.192	34.649	31.804	36.62	35.907	29.915	34.882	26.84	26.282	23.89
FBgn0264702	CR43971		ncRNA	3.658	1.205e-32	2.829	2.311e-09	2.653	2.381e-08	2.714	5.349e-09	22.3	15.879	14.393	15.098	1.558	0.92	1.3	1.402	0.567	1.314	0.672	9.377	5.646	4.811	6.26	7.326	4.221	4.437	6.695	6.979
FBgn0033141	CG12831		protein_coding	9.643	1.243e-32	4.81	1.544e-06	4.931	4.513e-07	7.212	5.26e-15	13.146	12.449	9.714	9.554	0.018	0.009	0	0.01	0	0.077	0	1.201	0.867	0.842	0.856	0.923	1.456	7.318	8.607	1.374
FBgn0036713	Mip		protein_coding	8.192	2.419e-32	0.1579	0.2881	1.999	0.001787	3.363	2.014e-08	16.895	16.523	11.642	9.624	0.023	0.089	0.029	0	0.427	0.593	0.037	0.221	0.414	1.447	1.948	1.499	1.481	4.195	4.122	3.193
FBgn0030237	CG15209		protein_coding	3.644	3.174e-32	3.316	4.904e-18	3.378	6.491e-19	3.849	7.762e-25	26.372	26.245	43.034	46.591	1.654	2.734	4.092	2.559	3.914	1.744	5.128	36.315	45.334	33.206	41.95	48.388	30.814	73.362	62.495	33.892
FBgn0021995	Rs1	DDX27	protein_coding	-0.7917	5.904e-32	-0.2735	0.0003839	-0.2423	0.005727	-0.303	0.0004569	34.731	38.779	35.905	35.058	60.51	70.528	60.028	61.234	72.298	65.432	63.082	53.383	52.563	51.076	58.959	54.753	50.79	51.562	53.633	53.175
FBgn0013773	Cyp6a22		protein_coding	-2.856	7.578e-32	-1.02	0.00076	-1.17	0.0001154	-0.6306	0.005071	0.669	1.343	0.549	0.464	5.938	6.765	4.84	5.372	4.84	6.16	6.261	2.14	2.939	2.8	1.843	2.558	2.729	1.475	3.926	3.272
FBgn0039994	conu		protein_coding	-1.41	9.883e-32	-0.007799	0.9833	0.08195	0.5882	0.0453	0.8261	12.726	13.657	11.032	14.027	35.495	43.549	28.271	30.749	34.267	35.498	40.45	36.468	32.438	39.872	41.42	40.96	41.055	38.657	40.906	35.992
FBgn0012034	AcCoAS	ACSS2	protein_coding	-2.696	1.656e-31	-0.01888	0.9371	-0.3488	0.0478	-0.6971	0.0031	7.298	6.969	14.06	12.974	51.71	34.094	99.827	89.49	90.711	81.279	68.256	77.925	81.886	63.59	39.384	41.752	60.686	40.981	38.163	43.671
FBgn0034897	Sesn		protein_coding	2.598	1.834e-31	0.5022	0.01858	0.7577	0.003404	0.5703	0.007207	82.979	51.398	95.578	97.352	13.641	15.793	12.205	11.079	27.345	35.744	27.347	65.344	62.551	36.553	72.073	69.292	36.883	64.926	67.12	32.908
FBgn0259188	Ir7f		protein_coding	4.118	3.347e-31	2.489	2.451e-08	3.582	3.923e-17	2.318	1.108e-07	22.585	28.676	27.235	36.124	2.375	2.353	0.612	0.965	2.823	3.432	1.735	13.162	18.141	16.929	43.434	35.376	23.242	20.135	17.477	6.744
FBgn0000008	a		protein_coding	3.456	3.7e-31	0.07	0.5417	0.1442	0.3123	0.1543	0.4214	4.938	2.529	4.082	2.783	0.266	0.183	0.321	0.496	0.682	0.476	0.228	0.628	0.47	0.832	0.502	0.773	0.819	0.787	0.87	0.338
FBgn0267585	CR45923		ncRNA	5.655	4.55e-31	0.4223	0.09715	0.1346	0.3568	2.011	0.0005154	48.44	60.659	32.112	37.053	0.743	0.68	0.89	0.944	4.715	3.236	0.866	5.322	10.94	8.546	2.659	7.579	6.498	4.098	4.219	35.101
FBgn0026196	nop5	NOP58	protein_coding	-1.517	4.837e-31	-0.4346	0.00191	-0.2637	0.04459	-0.5078	0.0004144	103.976	88.175	90.706	81.517	263.324	247.671	273.679	269.533	307.932	291.986	212.222	173.092	197.34	162.49	225.533	213.692	161.448	191.752	188.772	142.683
FBgn0011288	Snap25	SNAP25,SNAP23	protein_coding	2.589	9.645e-31	1.106	0.0002968	1.297	1.092e-05	1.534	5.757e-08	39.811	31.093	27.662	31.446	5.218	6.634	4.22	4.951	6.993	8.625	8.011	15.159	10.848	27.651	17.243	18.121	25.278	25.313	23.267	23.014
FBgn0030027	CG1632		protein_coding	4.931	1.377e-30	4.183	5.189e-15	4.815	2.668e-20	5.131	3.085e-23	5.885	9.199	2.055	2.28	0.176	0.203	0.095	0.121	0.307	0.28	0.144	4.813	2.873	6.518	8.2	7.094	7.268	11.289	9.744	7.312
FBgn0051217	modSP		protein_coding	-2.376	3.557e-30	-0.1252	0.2927	-0.2275	0.1236	-0.4531	0.01545	2.753	2.125	3.095	2.798	17.506	16.616	10.852	12.155	18.209	14.545	20.84	12.279	13.948	12.425	12.675	11.183	12.52	11.745	10.398	10.458
FBgn0024222	IKKbeta	IKBKB	protein_coding	-1.653	5.008e-30	-1.268	1.237e-12	-1.072	4.593e-09	-1.584	1.34e-19	20.054	23.702	22.723	25.184	74.703	93.349	62.102	61.771	62.798	75.002	83.71	27.809	29.29	33.264	37.898	32.598	33.367	23.645	27.648	21.501
FBgn0053181	CG33181	SLC41A2,SLC41A1	protein_coding	2.839	5.203e-30	0.08615	0.4625	0.163	0.2571	0.02656	0.92	1.874	1.396	1.575	1.264	0.24	0.174	0.183	0.229	0.65	0.709	0.444	1.249	0.958	0.395	0.989	1.019	0.695	0.601	0.96	0.379
FBgn0284223	CG46307		protein_coding	2.068	1.121e-29	1.404	7.85e-10	1.368	2.382e-09	1.534	5.833e-12	26.975	26.5	33.614	34.611	5.096	8.433	7.235	7.749	10.558	9.832	9.663	30.035	26.845	24.907	30.694	23.587	25.454	32.16	37	20.396
FBgn0004870	bab1		protein_coding	4.17	1.606e-29	3.038	5.512e-11	3.202	2.505e-12	4.038	6.744e-20	17.682	14.968	15.328	15.543	0.674	0.746	0.985	0.972	1.093	0.827	0.538	8.821	7.235	5.428	10.221	8.089	6.003	19.59	20.302	3.865
FBgn0004362	HmgD		protein_coding	-0.8082	2.003e-29	-0.183	0.04045	-0.1499	0.1436	-0.4569	7.162e-08	465.15	468.017	442.833	442.767	842.145	717.41	848.655	804.935	805.61	857.062	915.58	708.918	701.459	751.029	706.941	819.277	730.062	609.192	667.663	548.526
FBgn0030067	Rbm13	MAK16	protein_coding	-1.034	2.26e-29	-0.4676	1.911e-05	-0.3177	0.002904	-0.4497	4.772e-05	34.224	30.642	26.243	23.886	60.775	64.371	57.248	54.952	62.763	61.951	61.719	34.509	47.852	44.044	42.762	51.553	44.893	47.862	42.854	40.341
FBgn0051373	CG31373	PDF	protein_coding	-2.652	2.53e-29	-0.3105	0.05028	-0.6304	0.006611	-0.8729	0.0005322	4.015	2.434	3.848	2.525	17.784	13.927	27.608	22.97	32.208	33.037	28.488	15.208	23.423	17.245	16.347	12.461	20.795	18.46	11.064	15.923
FBgn0030789	Rrp45	EXOSC9	protein_coding	-0.8109	4.13e-29	-0.07138	0.5987	-0.06429	0.6011	-0.3583	0.0002495	19.541	17.841	19.073	18.221	34.557	30.222	34.882	32.378	30.658	31.215	27.124	24.849	29.217	27.035	27.854	28.619	26.189	19.395	19.454	25.584
FBgn0032780	CG13085		protein_coding	3.113	4.13e-29	2.769	4.266e-15	2.537	1.014e-12	3.309	3.587e-22	7.724	6.369	7.434	6.09	0.662	0.906	0.847	0.668	2.41	0.77	0.896	12.178	6.538	8.785	7.845	8.674	7.113	13.932	17.978	8.608
FBgn0264703	CR43972		pseudogene	4.8	1.404e-28	4.262	8.227e-12	4.316	2.973e-12	3.288	2.054e-07	5.137	7.853	9.481	10.292	0.199	0.207	0.493	0.224	0.145	0.336	0.188	4.988	6.415	3.457	6.519	6.525	2.746	3.244	4.144	0.819
FBgn0034496	CG9143	DDX24	protein_coding	-0.9414	1.406e-28	-0.2353	0.01338	-0.1787	0.122	-0.3146	0.004022	12.671	14.036	14.272	14.165	26.61	29.049	27.535	24.055	22.472	25.403	23.19	18.193	17.812	19.37	19.954	22.633	17.538	21.822	15.116	18.74
FBgn0037427	Osi17		protein_coding	9.425	1.622e-28	0.3693	0.1308	1.034	0.02979	3.164	5.151e-06	14.358	7.864	7.673	6.142	0	0	0.01	0.027	0.117	0.362	0	0.304	0.853	0.363	0.446	0.847	0.635	2.159	2.443	0.615
FBgn0266691	CR45181		ncRNA	4.634	1.692e-28	1.805	0.001154	0.6546	0.04345	1.398	0.003309	108.678	76.983	61.499	69.083	5.356	4.134	1.496	0.972	2.516	5.343	6.599	26.102	19.958	15.87	9.577	17.984	12.743	19.683	14.275	17.955
FBgn0000719	fog		protein_coding	4.71	1.822e-28	0.06873	0.5423	0.7158	0.03505	1.601	0.001049	1.375	1.856	0.785	0.918	0.025	0.038	0.068	0.05	0.181	0.196	0.133	0.376	0.3	0.178	0.387	0.637	0.349	1.054	0.677	0.27
FBgn0052772	CG32772		protein_coding	3.366	3.444e-28	1.812	3.127e-06	2.164	8.791e-09	2.452	1.772e-11	151.024	147.918	108.335	116.151	12.791	26.072	5.093	4.928	12.128	13.216	18.6	58.877	52.41	55.467	76.665	71.474	63.838	96.897	115.479	47.578
FBgn0050104	NT5E-2	NT5E	protein_coding	3.136	4.069e-28	2.271	2.072e-10	1.855	4.025e-07	2.547	1.842e-13	27.005	11.186	26.096	23.323	1.317	2.203	3.512	2.606	4.505	3.702	1.743	17.9	16.324	15.866	10.377	14.384	13.11	22.333	25.94	13.149
FBgn0263345	CR43426		ncRNA	3.502	4.472e-28	1.694	0.0004819	0.3282	0.1116	1.962	1.692e-05	3.93	3.107	4.002	4.749	0.349	0.317	0.294	0.377	0.56	0.157	0.483	1.848	0.939	1.66	0.387	0.579	1.42	2.275	1.174	1.931
FBgn0043854	slam		protein_coding	-3.502	1.289e-27	-0.05462	0.6686	-0.1017	0.4766	-0.009747	0.9749	0.393	0.39	0.361	0.183	4.473	5.013	3.194	2.95	4.397	3.619	2.968	3.601	3.428	1.359	2.995	3.408	1.525	3.879	4.733	2.225
FBgn0045761	CHKov1		protein_coding	4.116	1.824e-27	2.523	1.339e-07	2.205	4.962e-06	2.965	7.277e-11	25.724	14.464	9.11	9.269	1.028	0.824	0.442	0.906	2.198	2.766	0.526	15.201	10.041	8.392	9.543	9.59	8.33	15.648	17.61	12.982
FBgn0031258	CG4297		protein_coding	5.081	2.138e-27	2.417	8.664e-07	2.909	7.01e-10	2.642	1.921e-08	1.016	1.015	0.591	0.484	0.019	0.045	0.018	0	0.173	0.147	0.06	0.719	0.741	0.622	0.977	0.896	1.021	0.775	1.276	0.462
FBgn0024364	CG11417	ESF1	protein_coding	-0.9377	3.564e-27	-0.2327	0.01555	-0.2103	0.06219	-0.1611	0.1961	24.574	25.602	23.123	21.03	45.927	47.237	44.932	44.612	39.066	33.348	32.271	25.991	26.896	28.367	26.904	29.817	28.553	26.511	28.92	34.283
FBgn0010247	Parp	PARP1	protein_coding	-2.612	5.097e-27	-0.05125	0.7154	-0.2288	0.1358	-0.1468	0.4542	8.865	9.136	18.772	14.445	53.081	64.793	108.192	96.808	155.326	152.906	102.054	127.54	116.045	91.643	89.614	91.314	79.532	117.87	115.985	89.895
FBgn0043070	MESK2	NDRG4,NDRG2,NDRG3,NDRG1	protein_coding	1.501	6.446e-27	0.7263	8.561e-05	0.9738	6.543e-08	1.313	1.881e-14	31.466	24.974	30.709	31.951	10.354	11.916	9.147	10.105	10.459	10.276	10.75	20.547	17.049	16.843	24.164	20.922	18.128	31.191	30.647	18.161
FBgn0032297	CG17124	PPP1R14B	protein_coding	2.653	6.494e-27	1.283	0.0001038	1.143	0.0004266	1.703	2.574e-08	76.997	41.438	75.707	72.738	11.338	7.939	10.707	11.168	12.51	11.292	7.731	27.539	26.548	26.83	19.049	28.41	27.577	38.74	40.909	28.276
FBgn0037817	Cyp12e1		protein_coding	3.097	9.18e-27	1.893	2.286e-07	1.862	3.266e-07	2.173	5.787e-10	44.699	42.504	49.946	47.755	5.428	4.632	5.716	5.063	11.754	6.695	6.811	36.585	34.11	29.243	29.196	33.709	34.902	50.742	57.039	14.542
FBgn0028902	Tektin-A		protein_coding	6.001	1.034e-26	6.058	4.543e-07	6.142	1.724e-07	5.784	1.073e-06	3.847	4.716	3.998	4.863	0.06	0.057	0.093	0.034	0.055	0	0	2.563	1.867	2.329	1.839	3.461	2.316	3.804	1.326	0.676
FBgn0028903	CG13243		protein_coding	6.886	1.141e-26	6.14	3.23e-07	6.512	2.23e-08	6.169	1.972e-07	8.474	5.948	7.194	8.559	0.067	0.042	0.083	0.025	0.081	0	0	4.106	2.05	4.609	7.293	5.034	3.373	3.992	6.062	0.874
FBgn0031905	gudu	ARMC4	protein_coding	2.945	1.801e-26	1.06	0.003355	1.453	7.588e-05	2.157	1.814e-10	22.647	15.988	21.76	20.825	2.745	1.345	3.593	2.517	4.23	3.675	3.534	9.875	8.681	8.972	11.031	12.624	9.938	19.976	25.435	9.274
FBgn0260456	CG4806	RBM28	protein_coding	-0.9301	1.919e-26	-0.2653	0.004959	-0.2168	0.05224	-0.3808	0.0004319	23.569	22.577	24.583	26.235	47.786	49.779	44.426	44.839	46.887	44.118	40.385	33.275	36.826	29.957	41.609	31.927	33.968	34.978	33.863	28.498
FBgn0035760	CG8607		protein_coding	1.397	1.974e-26	1.008	1.704e-09	1.15	1.952e-12	1.596	2.696e-24	305.69	242.217	290.998	301.641	123.28	119.91	87.178	96.899	71.121	81.659	93.936	151.22	151.248	200.517	148.767	183.995	222.091	276.226	240.926	241.849
FBgn0029989	CG15333		protein_coding	3.338	4.444e-26	2.305	4.629e-08	3.178	3.125e-15	0.3721	0.08805	17.188	21.84	23.483	29.583	3.302	2.474	1.332	1.615	0.719	1.665	1.915	5.845	6.028	11.595	15.417	11.274	16.004	3.504	2.869	2.378
FBgn0050409	CR30409		pseudogene	4.5	6.384e-26	2.296	0.01167	4.081	0.0002256	4.38	3.285e-05	6.914	4.964	4.519	4.05	0.255	0.275	0.18	0.123	0	0.205	0	0.515	1.287	0.778	1.614	0.821	2.629	1.48	3.055	1.97
FBgn0259171	Pde9		protein_coding	-1.851	7.092e-26	-1.102	1.323e-06	-1.414	8.894e-11	-1.783	5.002e-17	3.828	3.64	3.398	3.164	13.975	9.7	14.46	13.353	11.946	11.203	10.326	4.426	5.128	5.635	3.155	3.246	5.752	2.976	2.44	3.981
FBgn0030247	CG15208		protein_coding	7.348	7.115e-26	3.835	0.00218	2.046	0.0151	3.903	0.0007411	7.94	7.606	6.347	5.608	0	0.069	0.023	0.041	0	0	0	0.521	0.13	0.437	0	0.138	0.373	0.748	0.441	0.172
FBgn0010113	hdc		protein_coding	2.845	7.691e-26	1.06	0.002483	1.375	9.441e-05	1.023	0.001025	17.042	17.827	12.625	14.642	2.211	3.786	1.244	1.104	4.736	6.118	2.741	12.549	9.599	9.879	12.303	12.149	13.239	13.166	12.519	6.487
FBgn0037065	CG12974		protein_coding	4.788	8.067e-26	0.8661	0.02835	1.722	0.001368	1.373	0.003556	3.334	1.984	3.173	2.586	0.04	0.113	0.198	0.03	0.534	0.6	0.168	1.575	0.755	1.394	1.479	1.556	1.837	0.977	1.6	1.569
FBgn0038258	CG7362		protein_coding	5.526	1.068e-25	4.392	1.929e-10	4.629	8.372e-12	1.987	0.00224	7.026	8.635	8.252	11.236	0.185	0.186	0.168	0.153	0.179	0.347	0.077	2.269	2.571	9.575	2.801	2.226	12.356	1.204	0.838	1.358
FBgn0267347	squ		protein_coding	1.272	2.742e-25	0.9051	6.105e-08	0.564	0.0002031	0.7966	3.389e-07	40.772	34.867	49.548	48.734	16.88	14.12	21.261	18.911	16.405	15.954	15.944	29.267	36	26.451	24.714	23.861	28.962	26.774	29.835	31.202
FBgn0036838	CG3808	TRMT2A	protein_coding	-1.064	4.559e-25	-0.2259	0.03058	-0.3512	0.0024	-0.4133	0.0007316	14.382	17.318	15.953	14.588	32.101	36.3	32.197	31.564	30.409	34.023	27.14	26.393	21.649	22.123	20.707	25.131	19.827	21.11	24.527	19.129
FBgn0034215	Mtap	MTAP	protein_coding	-1.562	6.639e-25	-0.07765	0.5932	-0.0982	0.5273	-0.1209	0.5131	9.236	9.726	8.685	6.675	22.089	23.95	29.559	27.337	21.559	30.326	28.146	20.081	27.173	20.99	23.838	19.451	25.203	22.374	20.387	26.893
FBgn0031062	CG14230		protein_coding	-1.004	7.534e-25	-0.06375	0.688	-0.07798	0.5827	-0.3269	0.007259	15.677	16.267	14.963	12.905	32.567	27.391	30.171	31.46	26.915	25.579	24.061	20.837	27.665	21.159	19.519	25.177	24.14	18.412	20.193	18.948
FBgn0038149	GILT1		protein_coding	0.9844	9.912e-25	0.3998	0.0001871	0.2376	0.03883	0.4365	0.0001095	323.273	288.667	312.083	322.081	166.613	140.304	156.64	158.133	159.313	147.543	141.141	215.964	206.295	218.236	166.296	181.424	214.798	193.119	189.988	252.6
FBgn0040297	Nhe2		protein_coding	1.989	1.045e-24	1.401	7.23e-09	1.409	5.389e-09	1.501	2.166e-10	21.061	19.577	24.714	25.652	4.647	6.557	5.503	5.755	8.276	7.424	7.024	23.846	19.937	18.101	23.664	20.372	18.18	25.417	26.732	14.211
FBgn0039929	CG11076		protein_coding	-0.7611	1.12e-24	-0.1385	0.1833	-0.04035	0.7536	-0.08446	0.5107	39.417	36.441	40.117	41.015	66.911	67.087	68.182	66.475	71.08	63.959	62.764	56.483	57.404	56.789	56.826	73.29	57.842	61.526	67.033	56.335
FBgn0036301	CG4069	KLHDC4	protein_coding	-0.9327	1.174e-24	-0.3834	0.0001926	-0.3535	0.0008256	-0.2837	0.01356	19.53	21.771	20.933	18.184	37.897	41.835	41.121	34.864	43.342	42.513	37.317	28.556	30.391	27.919	27.692	30.749	30.598	31.307	27.778	36.698
FBgn0085400	CG34371		protein_coding	3.778	1.225e-24	1.245	0.006303	1.122	0.008182	3.047	6.156e-12	11.234	12.005	11.51	10.344	0.329	0.408	1.159	1.246	1.344	0.974	0.767	3.807	3.334	2.199	3.274	2.906	2.693	10.629	13.895	3.499
FBgn0266657	CR45164		ncRNA	3.15	1.677e-24	2.124	8.369e-07	2.317	3.699e-08	0.559	0.0358	8.452	13.361	5.747	7.282	0.957	1.098	1.057	0.654	0.498	2.21	1.019	7.262	5.923	4.872	5.684	9.259	5.48	3.338	1.913	3.191
FBgn0003997	hid		protein_coding	4.419	3.104e-24	1.848	0.001046	2.034	0.0002486	2.846	5.302e-08	63.106	43.418	31.482	33.079	1.417	4.798	0.715	0.577	2.845	3.479	3.208	15.72	12.12	13.364	15.84	15.192	14.742	36.305	36.421	6.399
FBgn0265194	Trpm		protein_coding	-1.334	3.202e-24	-0.4373	0.002128	-0.6146	0.0001009	-0.7353	2.633e-06	3.976	6.025	4.786	5.007	14.794	11.325	11.423	13.177	10.199	9.634	9.649	5.807	6.608	6.8	5.994	4.463	7.302	4.427	5.688	6.246
FBgn0033446	CG1648		protein_coding	4.653	3.208e-24	0.1695	0.2462	0.8484	0.02795	0.351	0.1208	8.792	24.186	3.262	3.872	0.431	0.557	0.364	0.128	2.393	2.231	0.996	3.746	4.489	3.716	4.398	7.846	4.351	4.796	4.803	2.624
FBgn0041087	wun2		protein_coding	4.091	5.976e-24	1.569	0.003861	1.639	0.002475	1.917	0.000281	27.342	5.942	7.059	5.452	0.34	0.419	0.86	0.932	0.485	0.79	0.674	2.445	1.517	3.515	1.968	1.781	3.842	1.204	2.839	4.557
FBgn0028646	aralar1	SLC25A12	protein_coding	-1.233	7.127e-24	-0.1227	0.3263	-0.4917	0.0003647	-0.6592	4.426e-06	7.818	8.659	7.001	7.03	17.77	19.457	18.18	17.344	25.362	21.058	15.971	17.612	20.832	13.005	13.481	13.051	13.564	12.379	12.706	11.667
FBgn0267791	HnRNP-K	HNRNPK	protein_coding	0.7146	9.206e-24	0.375	3.657e-06	0.4715	1.633e-08	0.4376	3.64e-07	158.564	153.145	151.535	156.113	90.586	92.98	94.764	95.248	89.489	93.328	103.876	126.745	137.09	128.759	144.017	141.595	129.017	148.264	148.479	106.127
FBgn0265137	Spn42Da		protein_coding	0.8737	1.004e-23	0.2093	0.03643	0.1724	0.1495	0.2753	0.01681	27.955	26.173	25.546	26.644	13.231	15.118	14.21	14.707	17.606	14.805	16.089	20.283	21.659	19.245	20.548	16.394	20.592	22.174	20.659	18.859
FBgn0014032	Sptr	SPR	protein_coding	-2.943	1.598e-23	-0.02424	0.899	-1.015	0.003317	-1.319	0.0001859	1.49	1.623	1.517	2.142	14.767	7.055	15.681	16.775	20.212	16.012	8.536	13.241	18.419	7.954	7.615	6.46	4.911	4.891	4.691	6.251
FBgn0035334	CG8993	TXN2	protein_coding	0.9766	1.689e-23	0.4587	9.689e-05	0.7356	5.366e-09	0.8402	4.883e-12	131.586	111.604	114.942	108.544	57.933	58.283	61.541	55.921	63.217	76.292	72.856	100.785	104.407	108.994	118.627	119.274	124.218	140.442	128.442	125.011
FBgn0027903	CG12018	POLD2	protein_coding	-1.548	1.779e-23	-0.01198	0.9721	-0.07279	0.6618	-0.195	0.2463	18.171	17.643	18.648	16.205	52.049	43.795	57.639	56.358	46.708	43.564	45.166	38.971	46.036	46.502	35.821	39.929	43.506	34.353	30.455	43.677
FBgn0033538	CG11883		protein_coding	-1.416	2.334e-23	-0.2389	0.04328	-0.2897	0.03381	-0.7054	1.389e-05	36.181	46.242	45.529	49.451	125.107	130.134	109.196	116.09	111.258	119.142	156.091	75.546	86.682	111.924	89.932	76.167	108.706	83.947	74.876	60.807
FBgn0003076	Pgm		protein_coding	-1.952	2.369e-23	-0.06207	0.6742	-0.1907	0.1825	-0.191	0.2928	3.095	4.489	3.818	2.759	15.477	8.567	17.496	14.857	18.092	15.07	13.095	13.91	12.49	12.27	9.347	12.153	11.341	11.121	8.586	15.772
FBgn0030114	CG17754	KLHL5	protein_coding	1.535	3.006e-23	0.07309	0.6238	0.1182	0.4272	0.2533	0.118	57.494	32.656	38.681	39.379	15.163	16.032	13.15	12.738	16.634	12.442	17.367	20.396	16.259	18.068	19.274	17.623	19.4	20.422	19.339	21.369
FBgn0034418	CG15118	ANKRD13D,ANKRD13A,ANKRD13B	protein_coding	0.6505	4.108e-23	0.1926	0.02566	0.2517	0.004441	0.439	1.503e-07	58.817	60.002	65.336	62.826	38.122	42.017	37.826	37.871	31.115	33.487	36.298	39.919	40.864	40.771	40.591	40.808	43.349	48.508	52.101	41.588
FBgn0035204	CG2277	NT5DC1	protein_coding	-1.122	4.181e-23	-0.397	0.001276	-0.7085	1.14e-06	-0.5622	2.77e-05	6.827	7.476	8.197	8.26	18.106	14.865	17.434	17.764	19.377	15.931	20.008	14.187	11.392	12.281	9.599	9.773	12.823	11.398	11.454	11.933
FBgn0043025	Adgf-A2	ADA2	protein_coding	6.401	4.908e-23	1.82	0.007628	3.274	7.287e-06	1.074	0.02096	4.277	4.487	4.719	5.059	0.051	0	0.085	0.058	0.125	0.481	0.027	1.535	0.605	1.261	2.467	2.318	2.242	0.418	1.574	0.511
FBgn0036764	CG5535		protein_coding	-2.427	4.908e-23	-0.05019	0.7217	-0.1526	0.287	-0.2289	0.2171	10.569	10.636	8.006	6.836	45.319	83.567	36.388	34.607	74.948	71.7	46.071	56.569	64.689	36.485	55.282	41.113	37.927	48.462	51.605	35.534
FBgn0262814	CG43185		protein_coding	4.77	5.104e-23	4.935	1.95e-11	5.468	2.645e-14	5.259	2.12e-13	8.169	8.142	8.41	11.12	0.604	0.171	0.299	0.136	0.659	0.17	0.189	15.102	9.817	9.606	24.422	17.711	10.084	13.26	20.268	10.704
FBgn0052816	CG32816		protein_coding	3.939	5.575e-23	0.7683	0.03226	1.421	0.004015	4.153	9.832e-19	8.847	13.109	17.154	18.788	0.598	0.899	0.874	1.208	1.138	2.217	1.195	3.466	3.029	6.201	3.467	3.836	8.043	46.467	36.689	6.726
FBgn0032147	IP3K1		protein_coding	2.113	7.078e-23	0.3526	0.0463	0.01714	0.9356	0.05525	0.8196	2.193	1.626	1.748	1.826	0.452	0.427	0.579	0.193	1.533	0.658	0.759	1.841	1.655	1.445	0.605	0.998	1.127	1.777	0.437	1.107
FBgn0036202	CG6024		protein_coding	2.346	7.755e-23	1.582	6.25e-07	1.246	0.000159	1.509	1.588e-06	4.675	5.269	4.387	5.189	1.094	1.139	0.7	0.783	1.109	1.625	0.585	4.46	3.253	2.628	2.653	2.432	3.13	4.097	3.479	2.379
FBgn0053284	CG33284		protein_coding	5.583	8.802e-23	4.164	1.652e-08	4.322	2.404e-09	3.276	7.659e-06	8.951	7.663	6.259	6.378	0.144	0.191	0	0.195	0.21	0.487	0.091	6.139	6.642	3.295	7.368	8.698	2.414	3.527	4.737	1.241
FBgn0015519	nAChRalpha3		protein_coding	2.529	1.224e-22	1.285	0.0002065	1.526	4.511e-06	0.7361	0.004921	19.823	15.398	17.723	21.184	4.667	1.812	2.869	3.058	2.879	3.134	1.813	7.835	6.452	6.013	7.922	8.083	7.789	7.702	5.938	2.72
FBgn0035868	CG7194		protein_coding	-2.071	1.572e-22	-0.9635	0.0005585	-1.035	0.000159	-1.987	2.249e-15	151.762	159.618	300.629	322.834	981.022	773.039	1153.96	1116.59	963.776	898.865	906.827	390.788	416.171	525.575	417.781	355.145	502.244	188.186	165.364	318.226
FBgn0030262	Vago		protein_coding	-2.51	2.402e-22	-0.2073	0.1341	-0.2183	0.1517	-1.467	5.151e-06	19.895	29.734	28.696	25.318	148.676	162.637	149.685	151.094	161.575	126.977	159.272	74.308	79.489	112.854	82.235	85.963	111.903	61.532	60.788	31.378
FBgn0001234	Hsromega		ncRNA	1.418	5.991e-22	1.104	7.23e-09	1.114	4.782e-09	1.673	8.047e-21	7.546	6.199	7.08	7.594	3.071	2.727	2.253	2.407	1.519	1.711	1.658	3.621	3.154	3.923	3.257	3.566	3.94	5.824	4.849	5.26
FBgn0262731	CG33941		protein_coding	-1.488	1.159e-21	0.1467	0.2169	0.1626	0.2473	-0.19	0.2606	10.979	6.745	12.134	11.415	29.16	25.509	32.689	30.009	34.577	31.225	34.915	45.414	49.789	37.269	47.098	42.698	38.506	25.187	30.814	25.549
FBgn0003326	sca		protein_coding	3.913	1.184e-21	2.052	0.0001483	1.632	0.001933	1.02	0.01055	2.759	3.976	4.856	4.962	0.276	0.383	0.16	0.213	0.565	0.703	0.338	3.54	2.56	1.453	2.388	2.172	1.479	1.963	2.343	0.563
FBgn0013563	Pex1		protein_coding	1.771	1.396e-21	0.6608	0.003036	1.217	3.015e-07	0.5243	0.004879	21.734	38.784	34.449	40.487	10.298	10.623	8.672	9.35	11.309	11.036	13.5	16.458	17.554	30.158	27.185	26.981	31.619	22.108	18.528	20.213
FBgn0036018	CG3335	RBM19	protein_coding	-1.045	1.809e-21	-0.2273	0.03337	-0.3733	0.001933	-0.4295	0.000725	14.346	15.835	14.394	14.483	31.201	37.011	26.341	29.243	35.531	34.669	28.289	26.021	27.871	20.662	21.566	24.395	22.87	25.018	23.554	20.161
FBgn0085265	CG34236		protein_coding	5.106	1.904e-21	2.665	0.000373	2.764	0.0001543	2.732	7.928e-05	21.354	7.641	9.595	6.909	0.312	0.163	0.343	0.389	0.882	0.487	0.163	4.576	3.55	2.96	1.919	4.037	5.706	4.507	3.321	4.265
FBgn0052082	IRSp53		protein_coding	2.15	2.646e-21	1.064	0.0004093	1.388	1.371e-06	1.825	1.772e-11	227.694	301.145	234.424	263.109	57.876	51.499	54.857	60.767	52.801	58.291	73.94	116.52	104.45	189.814	167.155	136.536	201.318	252.592	232.986	198.873
FBgn0033431	CG1827	AGA	protein_coding	-2.026	2.762e-21	-0.1368	0.2462	-1.28	1.07e-05	-0.4833	0.01482	3.175	3.104	3.141	3.652	14.831	8.318	15.296	16.137	9.769	11.728	11.411	7.946	7.763	7.186	3.38	3.487	5.728	6.154	4.681	7.924
FBgn0020415	Idgf2		protein_coding	2.222	3.362e-21	0.5366	0.01865	0.2772	0.08744	0.6565	0.004765	90.548	83.761	105.773	115.917	25.498	20.833	18.224	17.827	39.85	40.454	18.727	72.919	64.664	48.071	56.336	62.426	42.235	73.217	72.379	45.835
FBgn0243586	Tb		protein_coding	6.872	3.536e-21	4.334	6.496e-07	3.649	3.98e-05	4.243	4.325e-07	8.919	7.15	6.872	6.333	0.063	0.09	0	0.036	0.231	0.178	0.05	1.947	5.498	3.09	1.407	2.865	2.436	2.84	5.962	1.777
FBgn0023000	mth		protein_coding	1.222	3.614e-21	0.672	0.0001244	0.9375	6.286e-08	0.8035	8.69e-07	23.538	20.079	22.952	25.736	10.219	11.733	7.891	9.003	8.267	9.083	9.867	17.039	15.343	13.679	17.683	19.986	15.84	19.469	16.266	15.444
FBgn0031126	Cyp6v1		protein_coding	0.9077	4.629e-21	0.2804	0.006314	0.3084	0.006774	0.2347	0.0666	31.992	26.63	28.9	29.047	15.101	16.02	15.055	14.996	12.082	12.765	17.699	18.577	18.922	20.647	19.355	17.692	20.674	21.552	17.028	15.439
FBgn0041789	Pax		protein_coding	1.385	5.782e-21	0.9907	2.768e-07	0.9634	4.454e-07	1.463	2.774e-16	49.213	38.585	43.731	42.044	19.514	16.291	13.904	15.627	13.244	11.784	12.351	25.709	25.261	24.54	24.312	25.382	24.802	37.973	36.876	30.192
FBgn0086912	mbm		protein_coding	-0.9835	8.135e-21	-0.1575	0.1662	-0.1292	0.3319	-0.1655	0.2434	20.704	22.302	18.679	16.983	40.18	46.961	35.274	35.461	39.741	36.452	31.377	28.847	30.96	27.26	32.321	30.137	29.863	27.438	32.247	31.682
FBgn0003423	slgA	AC007325.2,PRODH	protein_coding	-0.9779	8.684e-21	-0.05085	0.7673	-0.2559	0.03075	-0.4029	0.0008805	13.904	15.55	18.231	18.434	32.201	32.132	35.271	32.844	45.643	44.969	35.151	43.981	42.373	30.271	36.939	31.647	28.892	29.865	31.137	28.555
FBgn0034299	CG5757	DTYMK	protein_coding	-0.9632	9.857e-21	-0.06686	0.6695	-0.08728	0.5408	-0.2927	0.02185	15.811	18.275	17.91	15.275	34.205	30.283	34.874	34.464	40.799	34.431	32.482	35.734	30.9	30.713	28.811	35.198	31.539	27.227	23.636	30.807
FBgn0028523	CG5888		protein_coding	2.187	1.096e-20	0.1067	0.3653	0.07622	0.6303	0.1514	0.4369	74.744	47.135	83.072	84.988	12.733	18.722	15.04	15.303	29.155	32.235	22.579	37.564	47.301	34.129	34.378	33.398	34.792	42.692	40.907	23.415
FBgn0053252	CG33252		protein_coding	5.536	1.333e-20	4.579	3.917e-08	4.149	7.596e-07	4.686	6.124e-09	21	10.592	11.676	10.885	0.12	0.264	0.247	0.404	0.436	0.112	0.251	9.617	11.44	3.321	5.535	7.513	5.231	13.651	11.657	2.461
FBgn0005775	Con		protein_coding	1.928	1.78e-20	0.1657	0.1745	0.3864	0.03084	0.1159	0.5695	26.644	21.257	22.47	24.661	7.018	4.894	6.068	6.405	4.766	5.474	2.936	8.31	5.505	5.88	6.799	7.574	7.613	5.953	5.586	4.138
FBgn0283479	Alp1		protein_coding	3.571	1.946e-20	3.101	1.78e-09	3.755	3.492e-14	4.1	2.639e-17	2.876	3.221	3.21	3.163	0.217	0.325	0.157	0.285	0.264	0.611	0.256	4.532	2.05	3.83	7.028	6.133	3.476	9.286	8.979	3.28
FBgn0034145	CG5065	FAR1,FAR2	protein_coding	5.992	2.01e-20	0.3008	0.1538	0.671	0.0548	1.491	0.00599	1.86	1.461	1.732	1.429	0.024	0.034	0.007	0.02	0.585	0.553	0.178	2.109	1.074	0.594	1.816	1.86	0.713	2.181	3.119	0.445
FBgn0263005	CG43313	CHPF,CHPF2	protein_coding	-0.987	3.395e-20	-0.2385	0.02606	-0.2079	0.09978	-0.3246	0.01236	6.239	5.46	4.387	4.789	11.954	10.406	9.988	9.452	10.351	10.694	9.27	7.997	7.808	6.934	8.593	9.161	6.624	8.553	7.981	6.578
FBgn0014010	Rab5	AC099811.2,RAB5C	protein_coding	0.994	3.499e-20	0.6443	2.599e-06	0.5012	4.93e-05	0.3696	0.003086	167.202	120.883	148.046	156.497	75.641	64.819	75.477	76.787	77.108	82.175	83.193	143.343	129.02	117.749	118.386	133.867	117.621	131.234	114.856	88.186
FBgn0285896	btl		protein_coding	2.436	3.561e-20	0.00499	0.9891	0.06268	0.6999	0.03557	0.8893	8.69	8.985	4.695	5.364	1.739	1.441	0.683	1.057	5.102	4.52	2.731	4.281	4.344	3.956	5.072	5.924	3.965	5.501	4.153	3.632
FBgn0038243	CG8066		protein_coding	1.905	5.046e-20	0.9365	0.001598	0.5773	0.01159	1.473	1.781e-07	56.109	37.234	34.891	30.294	10.708	12.327	8.278	9.914	6.802	5.567	4.071	12.244	13.214	8.745	8.502	11.016	10.515	17.474	19.065	10.933
FBgn0005612	Sox14		protein_coding	1.966	5.767e-20	1.063	0.0002549	0.2781	0.07931	1.178	1.335e-05	34.805	21.338	38.265	39.697	8.143	8.857	7.54	8.915	8.285	7.426	6.141	17.778	17.324	12.919	11.805	9.663	13.063	13.908	19.22	18.957
FBgn0030716	CG9170		protein_coding	-3.345	6.597e-20	-0.04359	0.7235	-0.1655	0.2649	-0.09498	0.6452	1.452	1.972	0.608	0.585	16.091	12.235	9.859	11.286	7.959	10.035	7.342	6.354	6.574	5.918	4.452	5.316	4.768	2.541	3.835	13.174
FBgn0032988	Tif-IA	RRN3	protein_coding	-1.033	7.598e-20	-0.04911	0.7863	-0.1278	0.3469	-0.1462	0.33	23.912	29.22	34.684	33.005	59.505	70.616	62.408	59.297	75.125	72.071	64.138	68.703	66.864	59.625	62.447	62.053	56.499	61.945	66.611	55.817
FBgn0038291	CG3984		protein_coding	4.896	7.598e-20	0.5923	0.09066	2.085	0.007577	2.038	0.00497	6.247	4.49	2.462	2.539	0.17	0.107	0.07	0.128	0	0.266	0	0.535	0.401	0.359	0.629	0.782	0.597	0.769	0.907	0.388
FBgn0032554	CG15278		protein_coding	7.865	8.543e-20	6.324	6.308e-16	6.61	1.133e-17	7.654	2.717e-23	5.896	7.292	3.374	3.55	0	0.018	0	0.042	0.206	0.053	0	7.842	6.408	7.309	9.208	7.244	10.74	23.194	20.3	11.593
FBgn0052206	CG32206		protein_coding	2.775	8.864e-20	1.218	0.002128	0.1695	0.2449	0.2156	0.2568	4.168	3.648	5.505	4.705	0.468	0.663	0.701	0.688	1.261	2.858	0.706	4.205	4.645	3.89	1.895	1.625	4.195	1.903	2.734	2.612
FBgn0026751	XRCC1	XRCC1	protein_coding	-0.8349	9.46e-20	-0.2363	0.01562	-0.2328	0.03887	-0.6779	1.027e-09	38.588	45.647	39.079	38.471	82.079	69.442	72.49	68.892	64.756	63.137	56.154	47.949	49.282	45.171	50.668	50.947	45.832	29.845	38.517	40.528
FBgn0003028	ovo		protein_coding	2.061	1.044e-19	0.7234	0.008049	1.236	5.67e-05	1.004	0.0003747	0.771	0.779	0.516	0.433	0.177	0.171	0.12	0.104	0.209	0.224	0.458	0.772	0.5	0.662	0.662	0.665	0.988	0.504	0.689	0.85
FBgn0053505	U3-55K	RRP9	protein_coding	-1.035	1.297e-19	-0.2054	0.06138	-0.2288	0.07338	-0.3933	0.003438	14.157	14.628	13.809	14.191	27.736	28.246	31.217	31.228	28.891	30.529	21.238	23.029	18.343	19.818	22.746	21.555	18.356	20.004	15.012	21.356
FBgn0038313	CG4338	TSR3	protein_coding	-1.376	2.007e-19	-0.02152	0.9364	0.007492	0.9784	-0.02673	0.9148	19.834	18.153	12.218	13.307	45.719	40.105	41.647	39.583	32.989	36.672	40.034	34.517	32.408	37.672	33.297	42.229	35.806	25.977	30.602	47.483
FBgn0266282	jnj		protein_coding	-0.8764	2.007e-19	-0.198	0.05467	-0.3396	0.001997	-0.3003	0.01116	21.393	24.528	24.595	25.288	47.626	50.279	39.466	41.313	42.195	38.068	45.671	34.974	33.897	31.257	32.326	29.242	30.655	33.292	27.649	36.539
FBgn0038321	CG6218	NAGK	protein_coding	-2.178	2.251e-19	-0.1544	0.2027	-0.1797	0.2128	-0.2092	0.2594	1.873	0.983	0.782	0.841	5.162	4.093	5.534	5.474	6.265	7.565	5.697	3.176	4.592	4.943	5.376	3.59	4.486	3.946	3.69	6.25
FBgn0259697	nvd		protein_coding	-2.921	2.297e-19	-0.03272	0.8345	-0.05281	0.7403	-0.04844	0.84	1.137	1.543	0.892	0.875	9.745	9.599	8.012	8.079	12.033	10.361	11.242	11.121	10.21	6.769	10.951	11.364	5.49	9.739	11.771	8.795
FBgn0029996	UbcE2H	UBE2H	protein_coding	1.233	2.389e-19	0.2614	0.02902	0.3916	0.005231	0.268	0.07504	156.507	118.067	126.177	142.915	63.575	77.037	43.477	42.902	49.829	55.933	70.903	89.617	84.157	77.709	85.87	90.217	88.617	83.665	81.826	65.743
FBgn0037941	CG12594		protein_coding	4.814	3.031e-19	3.27	2.541e-05	2.023	0.004875	1.832	0.004472	2.97	2.168	0.957	1.104	0.085	0.045	0.093	0.011	0.034	0.133	0.059	0.89	0.9	0.874	0.157	0.426	0.788	0.46	0.565	0.352
FBgn0051431	CG31431		protein_coding	-3.442	3.183e-19	-1.552	0.001049	-1.498	0.001223	-2.764	3.931e-10	0.717	1.839	0.491	0.684	10.893	19.965	7.177	5.307	27.087	26.16	46.845	7.883	11.235	10.551	11.322	10.063	9.187	5.804	3.046	4.57
FBgn0014427	CG11899	PSAT1	protein_coding	-2.255	4.987e-19	-0.6228	0.0154	-0.4357	0.03392	-1.02	0.00057	4.199	6.225	5.941	5.392	30.513	24.881	26.903	25.693	24	23.227	38.337	13.526	13.082	16.652	12.643	14.023	19.972	5.885	7.006	22.589
FBgn0003366	sev		protein_coding	-2.423	5.743e-19	-0.5973	0.02205	-0.242	0.1317	-1.271	0.0001292	9.847	15.434	26.263	25.071	109.228	56.576	125.618	135.608	73.775	78.226	46.353	30.695	31.966	34.485	46.935	33.121	38.534	33.099	28.345	13.587
FBgn0032929	Mcm10	MCM10	protein_coding	-1.096	7.073e-19	-0.03722	0.8618	-0.473	0.0005651	-0.4207	0.002332	15.187	12.465	15.602	14.204	28.906	27.183	34.346	34.623	36.191	37.342	32.084	36.857	34.907	27.253	20.062	24.265	24.175	23.599	20.822	27.827
FBgn0015513	mbc	DOCK2	protein_coding	-0.9552	7.711e-19	-0.2715	0.01018	-0.4684	0.0001154	-0.611	1.013e-06	24.853	26.903	29.497	29.301	55.965	60.068	49.39	52.633	46.311	47.481	37.791	31.136	36.29	29.335	35.269	23.559	29	29.846	28.03	23.617
FBgn0259923	Sep4		protein_coding	-1.378	1.007e-18	-0.9445	8.664e-07	-1.091	6.11e-09	-1.442	4.359e-15	1.895	2.232	2.558	3.018	6.27	4.593	7.78	7.219	16.22	20.004	14.338	9.257	8.478	8.117	7.533	8.217	7.539	7.267	5.006	6.216
FBgn0261955	kdn	CS	protein_coding	-1.269	1.032e-18	-0.1924	0.09692	-0.7829	1.281e-05	-0.9084	1.593e-07	22.577	25.037	27.238	22.47	53.898	47.195	71.472	66.584	100.485	73.646	64.802	57.015	64.975	53.706	42.966	42.007	47.634	34.166	32.464	54.199
FBgn0028544	CG16884		protein_coding	5.693	1.119e-18	0.07387	0.5349	0.4775	0.09977	1.006	0.02506	25.007	21.115	23.459	22.527	0.231	0.459	0.401	0.443	5.815	6.574	0.291	12.569	9.578	4.455	16.811	21.513	6.691	24.114	27.303	3.112
FBgn0037612	CG8112	SOAT2,SOAT1	protein_coding	-3.315	1.309e-18	-0.5105	0.01907	-1.062	0.0005888	-1.357	1.494e-05	0.153	0.247	0.044	0.084	1.306	2.065	1.125	1.04	2.297	2.311	3.202	0.554	1.505	1.987	1.058	0.994	1.359	1.075	1.115	0.849
FBgn0035515	CG14997	AC090527.2,SQOR	protein_coding	-1.641	1.468e-18	-0.08922	0.4913	-0.1457	0.3139	-0.2862	0.0959	5.088	7.08	4.47	4.193	16.595	14.498	18.226	17.226	17.929	15.571	25.659	12.666	16.467	17.891	11.579	16.006	17.74	10.136	13.56	17.709
FBgn0051690	CG31690		protein_coding	4.792	1.693e-18	0.09675	0.4483	0.1438	0.3586	1.289	0.01498	5.217	3.721	2.593	1.72	0.04	0.171	0.037	0.181	0.147	0.057	0.095	0.19	0.142	0.359	0	0.189	0.455	0.738	0.564	0.263
FBgn0010292	bys	BYSL	protein_coding	-0.9487	1.706e-18	-0.2979	0.005953	-0.2345	0.05612	-0.2402	0.07046	27.708	31.976	28.299	27.297	58.116	62.547	52.718	53.143	66.212	66.28	46.478	41.712	47.092	39.878	42.405	53.022	43.888	47.171	51.001	45.499
FBgn0011818	oaf		protein_coding	-0.8419	1.753e-18	-0.1344	0.2462	-0.25	0.02914	-0.2524	0.03702	11.703	11.607	11.038	12.486	23.292	24.177	18.528	19.126	21.32	24.569	24.79	17.394	19.74	22.399	18.397	16.267	20.716	19.574	17.326	20.084
FBgn0028509	CenG1A		protein_coding	-0.9598	2.126e-18	-0.09414	0.4878	-0.09014	0.5336	-0.2013	0.1451	27.107	33.022	26.389	27.918	56.615	63.613	49.977	56.328	35.074	35.962	26.822	28.77	27.992	28.185	31.55	26.732	28.894	32.282	28.455	21.16
FBgn0027507	CG1344		protein_coding	-0.9845	2.381e-18	0.05998	0.7131	0.08633	0.5538	-0.04533	0.822	15.544	21.07	19.813	21.792	37.749	42.148	38.642	39.299	43.404	40.905	39.164	48.29	46.633	40.956	45.762	47.679	44.592	44.583	43.464	30.984
FBgn0035421	CG12034	SMPD2	protein_coding	0.5021	2.604e-18	0.235	0.001505	0.2436	0.002834	0.351	6.833e-06	57.588	55.653	57.904	58.271	39.159	37.19	43.245	40.889	40.45	44.182	39.884	52.916	54.54	46.422	50.5	53.496	47.938	59.118	50.711	53.707
FBgn0031059	CG14229		protein_coding	-0.9986	4.156e-18	-0.2944	0.01109	-0.3028	0.01752	-0.2018	0.1722	17.029	20.845	18.018	18.056	44.416	33.706	35.744	36.955	29.723	24.17	30.088	18.89	18.259	21.964	20.38	19.02	21.364	16.499	21.94	28.212
FBgn0039058	VhaAC39-2		protein_coding	5.91	4.613e-18	4.064	0.00139	2.397	0.01025	0.172	0.3801	2.693	2.44	5.385	3.768	0.053	0	0.098	0.06	0	0	0	0.752	0.281	0.63	0.147	0.399	0.359	0	0	0.099
FBgn0260477	CG30283		protein_coding	8.843	4.809e-18	1.197	0.04476	0.6251	0.09351	3.852	0.0007395	60.388	23.181	9.584	8.631	0.04	0.075	0	0	0	0	0.125	1.127	0.985	0.851	0	1.048	0.809	2.915	2.705	1.783
FBgn0037094	CG7611	WDR26	protein_coding	0.7407	5.279e-18	0.229	0.01558	0.3955	6.675e-05	0.4465	1.485e-05	52.738	50.515	54.066	55.61	31.377	35.867	28.159	30.191	25.797	28.699	32.887	36.949	39.491	35.06	41.716	39.783	41.314	44.842	41.981	38.373
FBgn0038286	CG6966		protein_coding	0.6525	5.797e-18	0.09737	0.4179	0.07608	0.5311	0.07153	0.6076	40.229	35.533	39.028	41.142	24.172	26.402	23.764	23.514	22.189	21.696	24.665	24.964	24.939	26.684	25.468	21.587	27.427	24.886	23.51	24.571
FBgn0034834	LS2	U2AF2	protein_coding	6.842	6.878e-18	3.567	0.0006986	3.064	0.001997	4.676	1.317e-06	6.461	5.548	6.677	3.829	0.046	0	0.057	0.052	0.084	0.13	0.036	2.3	1.395	0.716	0.386	1.222	1.781	5.475	3.617	0.736
FBgn0036837	CG18135		protein_coding	-2.041	7.245e-18	-0.1275	0.2808	-0.1949	0.1825	-1.129	8.711e-05	19.237	42.916	24.105	30.127	126.383	101.88	135.622	130.137	73.026	90.817	68.978	57.8	56.331	43.702	56.108	52.287	46.471	36.935	40.723	20.456
FBgn0037822	CG14683	METTL15	protein_coding	-0.7408	7.389e-18	-0.02937	0.8907	-0.1418	0.2287	-0.05578	0.7285	23.391	30.746	25.481	24.913	40.286	49.78	46.418	41.32	53.814	54.864	45.829	52.265	51.504	44.707	43.316	45.488	44.551	50.165	49.638	47.412
FBgn0004646	ogre		protein_coding	3.412	1.194e-17	1.442	0.003861	1.642	0.001183	2.319	1.568e-06	32.847	31.83	30.295	30.148	1.993	6.477	1.366	1.186	5.108	5.462	3.154	16.541	19.054	11.025	18.271	18.617	13.797	32.159	37.142	8.649
FBgn0034994	Ir60a		protein_coding	7.404	1.194e-17	6.079	3.429e-06	5.796	7.59e-06	6.284	9.955e-07	7.521	6.271	4.63	4.553	0.061	0	0	0.034	0	0	0	2.298	1.667	0.614	0.927	1.659	1.236	2.104	2.736	0.369
FBgn0053512	dpr4		protein_coding	4.249	1.476e-17	2.227	0.0006138	0.2792	0.1626	0.1826	0.3382	23.291	18.741	9.764	12.603	0.929	0.568	0.703	0.922	1.71	1.229	0.394	8.717	7.959	2.128	2.604	2.137	3.404	2.934	1.572	1.632
FBgn0029531	CG13362		protein_coding	4.781	1.52e-17	0.4865	0.09255	2.255	0.001183	0.3576	0.1384	5.202	4.134	7.935	7.932	0.349	0.092	0.168	0.218	0.636	1.146	0.03	2.565	1.784	1.613	3.764	5.11	2.059	2.684	1.396	0.724
FBgn0038296	CG6752	RNF123	protein_coding	1.716	1.759e-17	1.524	2.311e-09	1.727	4.901e-12	1.637	5.901e-11	11.414	12.064	14.503	15.529	4.149	4.17	4.018	3.58	3.843	3.259	3.581	11.293	11.904	8.681	14.077	13.776	8.884	12.195	15.436	6.946
FBgn0264385	CR43837		ncRNA	3.644	2.183e-17	0.04007	0.7318	0.5188	0.06441	1.903	0.0002079	2.475	1.565	1.093	0.71	0.053	0.166	0.087	0.119	0.192	0.247	0.415	0.665	0.311	0.418	0.293	1.126	0.875	2.436	0.633	1.348
FBgn0030668	CG8128	NUDT6	protein_coding	-1.777	2.354e-17	-0.04922	0.7571	-0.1906	0.1839	-0.1366	0.4834	0.936	1.378	1.225	1.069	4.583	4.193	3.912	3.741	4.973	4.194	6.066	3.564	4.068	5.423	3.686	2.772	4.302	2.779	4.168	5.134
FBgn0085432	pan		protein_coding	2.541	2.549e-17	0.226	0.1385	0.1449	0.309	0.6394	0.01552	3.819	3.772	4.397	4.396	0.415	1.287	0.466	0.518	0.768	0.918	0.94	2.366	1.203	1.298	1.571	1.263	1.265	2.731	1.768	1.156
FBgn0259685	crb		protein_coding	-1.875	2.567e-17	-0.04428	0.7854	-0.1782	0.2143	-0.1361	0.4905	0.815	1.195	0.7	0.84	3.061	3.733	3.165	3.452	6.858	4.912	5.227	4.229	3.949	6.384	3.117	2.841	5.859	4.086	3.196	6.516
FBgn0031805	CG9505		protein_coding	-3.91	2.63e-17	-0.8959	0.02849	-0.9889	0.02032	-0.3076	0.1514	0.516	0.673	0.579	0.245	10.653	16.66	2.821	2.63	5.776	3.943	6.227	2.408	1.403	1.279	2.199	1.492	1.375	3.113	2.605	2.089
FBgn0015623	Cpr	POR	protein_coding	1.231	2.981e-17	0.9239	1.264e-06	0.86	4.356e-06	1.046	6.06e-09	40.408	34.549	39.117	41.999	15.543	15.559	17.192	16.827	19.444	20.957	17.06	42.443	40.956	27.63	38.445	41.22	28.205	45.214	49.745	27.466
FBgn0260960	Baldspot	ELOVL3,ELOVL6	protein_coding	-1.068	3.091e-17	-0.09189	0.5037	-0.3169	0.01409	-0.6367	1.154e-05	22.124	20.365	19.286	19.89	40.853	38.828	48.965	45.887	53.639	48.054	54.906	41.759	44.13	48.09	34.875	29.123	47.318	32.104	27.774	33.583
FBgn0036984	CG13248		protein_coding	-1.78	4.241e-17	-0.127	0.2834	-0.3434	0.04312	-0.5132	0.01018	3.13	5.425	4.563	4.638	17.157	15.059	14.945	15.669	11.634	11.754	14.833	10.112	7.857	9.115	6.793	8.015	8.457	8.668	7.098	6.457
FBgn0031053	CG14223		protein_coding	2.453	5.219e-17	1.34	0.00161	1.581	0.0001649	1.711	2.159e-05	2.596	3.101	2.158	2.242	0.532	0.359	0.458	0.417	0.934	0.507	0.209	1.3	1.377	1.692	1.158	2.037	1.759	1.855	0.987	2.536
FBgn0032330	Samuel		protein_coding	1.018	5.536e-17	-0.01767	0.9562	0.1195	0.4041	0.5288	0.0001276	30.731	35.303	27.704	28.023	14.421	16.261	14.153	14.095	15.112	16.345	11.473	14.092	13.454	13.907	18.849	16.052	15.356	26.027	23.82	17.536
FBgn0038683	CG11779	TIMM44	protein_coding	-0.6875	6.061e-17	-0.1034	0.3983	-0.2132	0.05011	-0.08722	0.5336	16.405	17.843	16.001	15.121	27.839	30.342	24.621	23.994	28.56	23.616	22.992	21.793	24.328	20.218	19.99	22.084	19.417	21.942	22.491	24.547
FBgn0003062	Fib	FBLL1,FBL	protein_coding	-1.206	7.19e-17	-0.3989	0.00568	-0.1463	0.302	-0.4086	0.007036	119.447	122.813	89.097	86.076	260.814	226.477	253.677	242.148	233.205	238.643	280.354	134.517	145.513	209.425	202.513	196.557	211.379	174.297	155.98	179.915
FBgn0259937	Nop60B	DKC1	protein_coding	-0.7359	7.267e-17	-0.2584	0.005621	-0.1049	0.3997	-0.2108	0.06549	93.454	85.505	68.906	64.917	139.824	139.444	123.77	125.454	139.819	136.012	123.948	99.035	100.485	107.203	127.279	120.617	109.469	110.627	109.39	114.888
FBgn0035761	RhoGEF4		protein_coding	-1.063	7.716e-17	-0.1181	0.3505	-0.5684	0.0001842	-0.108	0.5402	13.555	17.332	15.342	14.37	28.816	26.363	36.388	37.957	29.785	25.549	28.056	25.015	20.871	22.664	17.405	16.64	17.485	25.305	21.183	27.984
FBgn0050349	CG30349		protein_coding	-0.7163	8.677e-17	-0.3163	0.0006822	-0.3359	0.0008145	-0.3352	0.001668	37.668	40.957	36.362	34.945	60.223	68.529	57.975	63.335	72.079	71.374	56.091	44.552	54.908	47.459	53.75	52.063	42.871	47.449	51.103	52.305
FBgn0013269	FK506-bp1		protein_coding	-0.8215	1.024e-16	-0.3755	0.0004174	-0.3969	0.0003026	-0.7052	1.218e-09	183.004	169.542	175.726	152.872	284.497	266.728	345.156	327.709	385.039	368.936	273.15	232.548	246.307	244.254	233.672	263.667	224.137	197.953	211.318	195.004
FBgn0034636	twz		protein_coding	-2.538	1.075e-16	-0.0237	0.8946	-0.05922	0.7075	-0.4337	0.0498	6.668	4.927	6.953	7.284	42.27	15.18	47.91	51.894	31.046	23.442	13.48	21.894	25.123	12.341	23.274	17.76	13.604	12.258	11.001	12.577
FBgn0036235	CG6938		protein_coding	1.548	1.086e-16	1.2	1.033e-06	1.115	6.52e-06	2.22	2.001e-23	23.181	20.585	16.255	16.176	7.781	7.211	4.936	5.521	3.955	5.545	5.079	13.531	11.932	9.224	12.171	9.942	10.698	22.945	30.061	17.36
FBgn0031817	CG9531	HEMK1	protein_coding	-1.057	1.27e-16	0.04914	0.788	0.03608	0.8344	0.03555	0.8748	10.697	11.501	11.907	8.438	22.412	20.086	24.115	24.033	25.575	22.102	23.03	26.849	29.573	21.173	26.623	28.138	20.448	20.611	24.073	27.3
FBgn0028863	CG4587		protein_coding	3.968	1.345e-16	0.1549	0.2983	0.2786	0.1725	0.3549	0.1393	0.973	0.6	0.217	0.268	0.031	0.046	0.017	0.024	0.102	0.039	0.011	0.132	0.111	0.091	0.058	0.197	0.095	0.142	0.098	0.111
FBgn0004573	5-HT7	HTR7	protein_coding	4.52	1.611e-16	0.1898	0.2808	0.4945	0.1094	0.4739	0.1087	0.626	0.469	0.817	0.616	0.029	0.034	0.009	0.025	0.08	0.021	0	0.069	0.052	0.139	0.04	0.11	0.165	0.237	0.058	0.082
FBgn0085478	CG34449		protein_coding	0.9608	1.813e-16	0.05994	0.7151	0.252	0.04647	0.3624	0.006731	29.143	30.526	26.115	30.828	15.028	18.654	12.262	12.771	13.49	11.673	14.561	15.588	13.519	14.884	17.573	17.882	16.882	21.976	19.903	13.555
FBgn0038989	CG6937		protein_coding	-0.7586	1.826e-16	-0.2312	0.01916	-0.2107	0.06945	-0.2888	0.01259	50.357	44.85	38.479	36.651	77.108	71.699	72.961	70.31	69.885	67.129	69.657	51.046	56.199	52.975	56.188	58.569	53.742	61.303	54.132	48.593
FBgn0027330	l(1)G0020	NAT10	protein_coding	-0.9554	1.924e-16	-0.1385	0.2451	-0.1896	0.1461	-0.3717	0.005106	19.465	20.582	18.188	16.71	35.408	38.854	36.139	37.799	41.406	37.608	27.76	31.885	29.897	25.345	32.025	29.878	24.112	25.718	25.713	25.179
FBgn0016034	mael		protein_coding	-0.7229	1.949e-16	-0.07909	0.5668	-0.1675	0.1487	-0.1759	0.1411	37.587	45.368	46.854	47.816	71.349	72.045	76.611	78.205	86.714	85.173	82.631	76.573	74.822	78.828	69.767	74.402	71.8	60.61	72.863	83.884
FBgn0034021	CG8180		protein_coding	2.13	2.679e-16	0.08636	0.4542	0.7504	0.01023	0.2748	0.151	3.681	2.532	1.46	2.162	0.576	0.461	0.604	0.507	0.683	0.668	1.454	0.945	1.328	1.903	1.804	1.695	2.713	0.916	1.651	1.869
FBgn0053200	VepD		protein_coding	-4.102	2.682e-16	-1.12	0.01905	-2.411	0.0001408	-3.784	2.637e-08	1.01	1.255	0.914	0.662	20.212	6.065	23.614	22.111	13.18	15.752	8.592	5.087	3.962	1.536	0.956	2.594	2.141	0	0.517	1.207
FBgn0031968	CG7231		protein_coding	-2.822	2.862e-16	-0.1733	0.2021	-0.6132	0.02871	-0.8924	0.006352	0.674	0.476	0.784	0.662	5.417	1.727	6.167	6.095	8.291	5.821	5.931	4.073	4.149	2.992	3.06	2.661	3.272	0.983	1.586	4.96
FBgn0032987	RpL21	RPL21	protein_coding	-0.614	3.222e-16	-0.129	0.2224	0.004968	0.9796	-0.08286	0.5089	1605.76	1682.55	1481.17	1471.99	2547.5	2252.77	2506.34	2379.51	2502.01	2434.81	2718.8	2049.36	2053.04	2590.67	2351.06	2785.16	2567.46	2464.54	2525.82	2170.87
FBgn0022338	dnk	TK2	protein_coding	-0.8846	3.587e-16	-0.05395	0.7512	-0.1685	0.1897	-0.4932	8.044e-05	47.553	43.557	53.39	45.475	91.274	85.594	88.787	91.782	92.842	90.516	111.139	91.576	84.866	94.724	72.374	83.49	87.963	64.971	66.374	64.795
FBgn0035630	CG10576		protein_coding	-0.9034	3.707e-16	-0.9926	5.281e-13	-1.433	4.622e-27	-0.3732	0.003327	128.658	101.478	103.795	86.003	182.027	183.966	219.451	214.726	194.442	169.546	182.346	89.993	92.575	89.582	63.818	63.48	72.575	125.522	135.256	134.363
FBgn0034365	CG5335		protein_coding	1.147	3.712e-16	0.09336	0.4809	0.423	0.007015	0.3525	0.02814	27.757	22.256	20.707	20.516	12	12.16	8.359	7.546	7.671	8.597	9.116	11.161	10.268	10.072	12.962	15.855	11.546	13.383	13.869	10.362
FBgn0052521	CG32521		protein_coding	-0.9611	3.905e-16	-0.5616	9.582e-05	-0.1928	0.1405	-0.4171	0.001666	61.517	70.698	59.012	63.54	141.103	102.676	125.061	137.248	84.263	92.09	119.281	58.69	54.421	75.355	83	73.572	80.654	69.835	66.896	69.018
FBgn0264704	CR43973		ncRNA	3.761	4.205e-16	3.842	4.969e-08	4.021	5.474e-09	1.263	0.01397	6.082	10.358	8.131	11.514	0.821	0.537	0.391	0.71	1.149	0.533	0.099	10.137	12.505	2.85	13.652	12.83	3.279	3.597	2.525	1.415
FBgn0013726	pnut	SEPT7	protein_coding	0.6762	4.327e-16	0.02711	0.9005	0.04436	0.7438	0.1606	0.1653	224.631	198.475	227.149	241.236	135.229	133.693	144.297	136.353	151.819	149.665	187.923	150.866	164.435	191.898	184.022	146.773	186.052	173.504	177.826	207.414
FBgn0264699	CG43968		protein_coding	2.821	4.385e-16	2.418	3.123e-08	1.397	0.001834	0.1166	0.5552	30.073	29.169	30.403	44.006	5.924	3.853	3.181	4.898	1.612	2.223	4.501	17.42	15.843	15.627	6.486	6.742	12.734	3.603	3.119	4.546
FBgn0032051	CG13097	MPHOSPH10	protein_coding	-0.6929	4.907e-16	-0.2043	0.03696	-0.2432	0.02439	-0.2998	0.006087	22.147	21.792	18.861	20.089	33.138	35.761	34.811	32.162	34.989	33.549	29.034	26.76	26.74	24.619	25.236	23.375	28.671	29.659	23.075	24.287
FBgn0261556	CG42674		protein_coding	0.9799	5.488e-16	0.1649	0.1513	0.39	0.003039	0.7168	8.076e-07	14.826	12.896	13.428	13.081	6.051	7.981	6.076	6.811	4.31	5.376	6.079	6.239	5.647	8.299	7.682	7.331	8.22	9.46	10.567	7.733
FBgn0000636	Fas3		protein_coding	3.596	6.259e-16	0.2413	0.1721	0.1399	0.3364	0.3044	0.1535	48.07	23.851	86.897	76.588	2.518	4.196	5.99	5.382	21.181	26.567	12.48	58.977	58.904	22.377	43.384	44.895	22.955	55.316	52.691	15.406
FBgn0031730	CG7236		protein_coding	6.127	6.838e-16	-0.0009071	1	-0.01302	0.9399	0.8347	0.04973	10.374	4.221	2.522	1.283	0.052	0.025	0.016	0.118	0.048	0.074	0.041	0	0	0.125	0	0.049	0.059	0.533	0.524	0.122
FBgn0267297	CR45733		ncRNA	8.974	6.983e-16	4.357	3.464e-05	2.764	0.003965	5.005	3.383e-07	48.958	34.027	38.754	33.858	0	0	0.144	0	0	1.314	0	17.098	16.112	4.996	5.828	3.956	7.122	31.373	28.491	5.234
FBgn0003390	shf		protein_coding	3.124	7.408e-16	-0.05856	0.6078	-0.6789	0.05231	-0.08303	0.6781	3.271	3.406	3.255	4.16	0.401	0.361	0.405	0.348	1.658	0.666	0.4	0.774	0.644	0.26	0.202	0.548	0.082	1.037	0.291	0.714
FBgn0035346	CG1146		protein_coding	1.43	8.439e-16	0.2201	0.08242	0.02356	0.9082	0.4922	0.005705	75.21	44.081	70.528	68.403	20.345	19.493	25.507	28.262	23.393	23.997	14.161	32.172	30.182	28.914	16.309	18.014	29.613	35.01	34.511	31.169
FBgn0261553	CG42671		protein_coding	1.048	8.468e-16	0.04817	0.7939	0.08373	0.5911	0.2178	0.1514	25.809	23.728	26.775	29.043	12.196	15.386	11.043	11.205	10.972	11.975	14.392	12.96	11.573	16.384	12.671	12.956	16.576	15.581	13.806	17.025
FBgn0051560	CG31560		protein_coding	8.64	8.544e-16	2.953	0.007231	0.1805	0.3302	5.113	4.178e-05	25.42	12.07	8.753	8.432	0	0	0.084	0	0	0	0	0.479	0.119	0.963	0	0.127	0.153	2.2	1.891	0.631
FBgn0004167	kst	SPTBN5	protein_coding	3.896	8.62e-16	0.06915	0.5423	0.08201	0.5492	1.013	0.01503	37.6	44.407	33.248	30.24	2.46	3.157	1.607	1.782	4.276	4.301	5.279	6.026	5.642	12.624	4.604	3.857	13.996	6.354	5.718	33.635
FBgn0015393	hoip	SNU13	protein_coding	-1.179	8.85e-16	-0.3898	0.006896	-0.3867	0.007927	-0.4203	0.006244	107.447	93.102	89.056	78.4	236.571	225.391	200.625	188.863	254.065	237.27	177.987	148.077	155.311	131.862	151.155	164.228	126.79	132.438	148.66	164.592
FBgn0037144	CG7458		protein_coding	-2.344	1.272e-15	-0.2428	0.1144	-0.2476	0.1281	-1.387	0.0001207	0.708	0.787	0.892	0.667	3.987	3.053	4.558	4.74	5.223	4.671	5.429	3.066	2.991	2.583	2.763	2.216	3.921	3.072	2.596	0.367
FBgn0085386	CG34357		protein_coding	3.61	1.274e-15	2.814	8.441e-07	2.841	4.195e-07	3.572	2.92e-11	7.018	7.218	6.85	6.348	0.514	1.231	0.163	0.167	0.572	0.561	0.853	5.513	5.856	4.408	6.543	5.336	4.448	11.921	12.358	2.933
FBgn0023511	Edem1		protein_coding	0.4856	1.349e-15	0.1048	0.331	0.1271	0.2072	0.3363	5.419e-05	19.709	20.556	21.49	22.235	14.38	16.599	14.133	14.204	15.086	13.16	12.934	15.502	15.116	14.947	15.759	16.109	14.268	18.093	17.393	17.58
FBgn0004509	Fur1		protein_coding	1.118	1.477e-15	0.1479	0.2117	0.1466	0.2996	0.2311	0.1387	20.307	15.591	19.422	20.641	7.561	9.935	8.275	8.435	9.276	10.499	9.631	14.195	11.76	12.055	13.945	8.912	13.327	14.406	13.854	9.246
FBgn0051013	CG31013		protein_coding	1.927	1.547e-15	1.411	1.74e-05	0.991	0.001897	2.349	2.329e-15	20.394	18.002	13.439	14.967	5.538	4.671	3.001	3.751	3.911	3.906	3.169	9.62	8.515	12.409	10.165	6.62	7.946	23.363	22.512	13.244
FBgn0032408	CG6712	RPF1	protein_coding	-0.8148	1.954e-15	-0.2713	0.009244	-0.2298	0.05663	-0.253	0.04815	31.547	29.539	24.96	22.275	50.412	45.721	49.846	47.656	56.78	48.807	45.622	38.841	34.633	37.924	39.088	40.624	39.307	38.853	42.385	39.128
FBgn0026079	Nsun2	NSUN2	protein_coding	-0.8289	1.993e-15	-0.09566	0.4747	-0.1922	0.125	-0.2823	0.02521	26.721	27.493	31.768	28	46.737	47.471	57.476	54.812	52.478	51.403	40.907	45.118	46.667	34.689	39.099	41.292	37.443	32.784	41.363	38.005
FBgn0033434	CG1902		protein_coding	0.689	2.082e-15	0.2588	0.005936	0.223	0.04382	0.2387	0.03532	84.201	74.252	82.772	89.093	49.816	52.804	49.586	49.335	48.84	52.747	55.409	72.945	67.075	65.543	64.903	67.471	61.673	73.529	70.731	50.123
FBgn0003943	Ubi-p63E	UBC	protein_coding	1.76	2.163e-15	0.3791	0.0349	0.3393	0.04748	0.8282	0.0007408	81.562	78.173	63.238	65.063	19.972	39.099	12.184	11.4	25.768	29.279	32.285	57.139	46.041	48.389	52.352	42.514	49.946	62.688	63.305	52.622
FBgn0020379	Rfx		protein_coding	1.647	2.183e-15	0.1214	0.3042	0.2141	0.1458	-0.0507	0.835	9.055	13.581	14.409	14.382	3.926	5.104	3.436	3.537	3.215	4.237	5.498	4.919	4.996	8.265	6.526	3.986	8.666	4.551	3.318	4.253
FBgn0051361	dpr17		protein_coding	-3.555	2.19e-15	-3.192	2.638e-09	-2.737	3.453e-07	-4.766	1.462e-19	0.419	0.852	0.376	0.407	7.346	13.111	3.047	2.656	22.992	17.613	30.006	1.933	2.507	2.57	4.822	2.86	1.75	1.011	0.351	0.928
FBgn0264490	Eip93F		protein_coding	1.77	2.399e-15	0.1289	0.2748	0.9826	0.0005946	0.761	0.001572	16.994	11.653	7.933	9.433	3.757	3.169	3.263	2.916	2.807	3.183	3.521	4.468	3.602	5.746	7.047	7.072	6.358	7.827	7.278	3.991
FBgn0037153	olf413	MOXD1	protein_coding	-2.852	2.76e-15	-0.205	0.1782	-0.3054	0.1152	-1.782	6.344e-05	1.295	2.725	1.572	2.488	15.711	16.131	14.516	15.72	7.385	7.586	14.194	3.735	4.224	6.819	4.363	3.403	6.641	2.613	1.581	3.326
FBgn0038473	Ns1		protein_coding	-0.8383	3.335e-15	-0.131	0.2748	-0.1863	0.1413	-0.1338	0.3648	49.379	55.119	50.123	52.81	96.767	107.088	87.385	86.831	92.756	81	73.65	63.486	77.706	65.284	68.703	69.101	64.349	78.663	78.052	62.744
FBgn0263605	l(3)72Dn		protein_coding	-0.9879	3.346e-15	-0.1433	0.2275	-0.1752	0.1964	-0.2634	0.07216	11.179	12.801	10.899	11.675	23.093	27.904	22.188	21.229	23.889	20.429	15.672	15.69	17.279	14.518	18.031	14.357	15.611	19.022	13.061	14.827
FBgn0035246	CG13928		protein_coding	-2.284	3.511e-15	-0.1274	0.2881	-0.05997	0.7081	-1.032	0.00162	2.073	3.004	2.203	3.131	22.848	9.901	9.931	10.413	15.053	15.18	13.458	10.984	11.089	5.407	15	13.463	7.337	7.511	5.763	4.886
FBgn0036942	CG7328	KHK	protein_coding	-3.164	3.623e-15	-0.8242	0.004606	-0.4771	0.02219	-0.2782	0.1254	0.122	0.143	0.106	0.314	1.708	1.26	1.881	1.685	3.407	3.421	2.277	1.768	1.655	1.056	1.816	1.761	1.426	1.142	2.245	2.14
FBgn0033485	RpLP0-like		protein_coding	-0.8472	3.768e-15	-0.2064	0.05252	-0.1587	0.2179	-0.3307	0.009055	78.408	69.346	61.622	56.425	129.634	118.146	119.582	119.375	142.201	121.557	126.26	101.981	100.421	98.94	108.834	121.123	96.532	115.967	100.29	79.105
FBgn0262114	RanBPM		protein_coding	0.6511	4.807e-15	0.1421	0.1888	0.2084	0.05357	0.3487	0.0006415	64.952	63.016	71.415	78.728	44.996	50.384	37.018	41.881	40.025	40.217	46.591	51.802	44.951	52.027	51.587	48.267	53.874	59.545	56.542	52.272
FBgn0028979	tio		protein_coding	-1.838	5.352e-15	-0.3509	0.04669	-1.535	3.245e-07	-2.098	5.547e-13	3.431	2.838	5.061	3.575	11.96	9.229	16.487	17.337	10.473	9.087	7.826	4.627	5.715	5.201	2.668	1.854	4.387	2.518	1.947	1.722
FBgn0285910	VhaAC39-1		protein_coding	0.5168	5.476e-15	0.1299	0.1926	0.2328	0.008404	0.3336	7.928e-05	119.211	127.013	115.576	116.105	74.876	90.053	84.845	79.971	79.679	77.547	89.173	92.387	86.691	101.126	98.657	94.638	106.008	107.397	114.138	98.316
FBgn0037304	CG1113		protein_coding	3.301	6.284e-15	2.68	2.839e-06	3.115	1.582e-08	1.174	0.009408	2.479	3.046	2.288	2.112	0.328	0.341	0.122	0.129	0.239	0.508	0.309	2.481	2.555	2.614	4.369	4.078	2.039	1.069	1.838	0.797
FBgn0034223	Tes		protein_coding	0.5725	6.609e-15	0.08598	0.488	0.1813	0.08049	0.1337	0.235	95.986	76.672	75.808	76.768	55.435	51.704	53.892	54.302	40.08	47.111	47.376	47.944	51.647	48.925	54.246	49.91	54.335	53.547	52.488	45.22
FBgn0029823	Shmt	SHMT1,SHMT2	protein_coding	-1.124	7.506e-15	-0.2117	0.07021	-0.3447	0.01406	-0.4477	0.003458	33.138	37.22	32.94	28.599	66.265	52.628	91.666	84.011	80.448	73.414	73.067	49.435	56.367	57.618	50.264	53.47	50.54	43.978	41.913	62.79
FBgn0038038	CG5167	SCCPDH	protein_coding	-2.494	7.974e-15	-0.04119	0.7628	-0.1716	0.2392	-0.2167	0.2533	1.135	1.495	0.849	0.518	5.853	2.803	8.164	7.006	10.201	11.671	5.8	8.133	8.367	5.72	4.487	7.575	5.015	4.56	6.058	7.324
FBgn0023527	CG3071	UTP15	protein_coding	-0.7631	8.464e-15	-0.1402	0.226	-0.09693	0.4759	-0.3692	0.002202	20.167	21.927	23.936	23.956	36.405	36.108	41.343	41.975	37.753	34.757	32.37	34.007	26.495	27.265	30.583	34.531	28.298	29.377	27.027	21.553
FBgn0003312	sad	CYP27B1	protein_coding	3.048	9.38e-15	0.09229	0.4329	0.2996	0.1424	0.8205	0.02234	1.393	1.669	2.515	1.735	0.092	0.07	0.365	0.332	0.672	0.363	0.116	0.784	0.587	0.57	1.125	0.208	1.041	1.351	0.885	0.861
FBgn0028422	GluRIID		protein_coding	6.216	9.431e-15	0.3036	0.1713	0.1321	0.3877	3.274	1.886e-05	2.129	1.726	1.705	1.06	0.021	0	0.039	0.012	0.193	0.269	0.017	0.953	0.488	0.202	0.353	0.28	0.432	1.729	3.779	0.317
FBgn0030720	CG8939	FTSJ3	protein_coding	-1.077	9.574e-15	-0.2875	0.01986	-0.3658	0.008462	-0.4204	0.004764	33.415	33.258	32.975	30.002	69.213	69.772	71.705	69.38	78.074	75.413	49.175	48.004	52.41	39.418	51.244	47.125	38.789	47.918	49.278	39.874
FBgn0267945	CR46225		ncRNA	7.337	1.131e-14	3.554	0.00198	0.7416	0.07338	3.674	0.0005374	19.79	14.095	14.552	15.837	0	0	0.292	0	0.215	0.331	0	4.452	5.002	2.1	0.653	0.887	2.395	5.276	6.833	0.99
FBgn0051098	CG31098		protein_coding	-1.523	1.131e-14	-1.029	7.988e-05	-1.14	7.672e-06	-0.8348	0.0002188	4.752	4.586	5.565	5.151	12.099	14.233	16.678	16.26	29.391	18.802	15.919	7.997	10.346	11.497	8.048	8.69	10.878	7.519	9.059	14.333
FBgn0035383	CPT2	CPT2	protein_coding	0.9411	1.183e-14	1.189	8.106e-15	1.544	2.102e-25	0.08177	0.6678	41.558	36.841	25.764	29.309	14.241	14.713	19.438	19.559	17.519	15.093	14.562	38.609	35.804	34.229	47.413	51.959	39.787	17.882	16.125	17.214
FBgn0266819	CR45281		ncRNA	2.055	1.448e-14	1.177	0.001963	0.8508	0.008377	-0.05469	0.8167	5.537	4.587	4.883	5.13	1.582	1.083	0.988	1.004	0.441	0.62	0.779	2.055	1.442	1.335	1.772	1.617	0.958	0.359	0.661	0.576
FBgn0037646	CAHbeta		protein_coding	1.92	1.6e-14	0.02694	0.8775	-0.05888	0.708	1.319	7.294e-05	5.815	4.259	4.729	4.068	1.318	1.272	0.957	1.225	2.607	0.966	2.428	1.623	2.431	2.722	1.27	1.185	2.134	5.361	6.985	4.278
FBgn0021874	Nle	NLE1	protein_coding	-0.7893	1.646e-14	-0.2939	0.005595	-0.1654	0.1943	-0.1773	0.1993	20.533	25.737	22.397	19.104	40.599	42.366	36.704	35.292	38.794	38.959	36.599	23.595	24.61	33.998	31.824	30.923	32.453	34.45	32.034	31.344
FBgn0010905	Spn		protein_coding	1.832	2.125e-14	1.448	1.737e-06	1.629	3.34e-08	1.989	2.271e-12	81.105	85.807	82.822	86.382	22.865	31.728	17.687	19.122	20.381	23.068	15.631	65.184	63.087	40.679	77.681	68.356	45.398	100.865	110.688	34.377
FBgn0011704	RnrS	RRM2B,RRM2,AC007240.1	protein_coding	-0.9844	2.325e-14	-0.08493	0.5506	-0.02793	0.8836	-0.2645	0.06893	91.023	97.708	112.502	97.661	220.184	176.79	203.485	207.693	159.904	180.069	219.643	152.207	151.109	179.272	173.586	173.364	189.123	137.691	135.785	160.242
FBgn0261446	CG13377		protein_coding	2.219	2.599e-14	0.4649	0.04153	0.1171	0.4117	-0.001976	1	3.66	4.062	5.526	6.454	0.571	0.982	1.311	1.215	4.378	3.782	2.559	7.505	7.063	6.682	4.858	4.294	5.936	4.976	4.156	1.979
FBgn0024179	wit		protein_coding	-2.744	2.922e-14	-0.05816	0.6238	-0.1547	0.289	-0.2361	0.2232	0.141	0.571	0.235	0.208	2.203	2.476	1.737	2.06	0.904	0.414	2.046	0.842	0.713	0.829	0.301	0.671	0.946	0.694	0.434	0.869
FBgn0266284	Ns3	LSG1	protein_coding	-0.5576	3.104e-14	-0.2956	0.0004093	-0.2168	0.02927	-0.2692	0.005661	36.937	40.143	39.461	36.44	56.056	57.321	56.969	58.434	55.439	58.114	46.559	40.809	42.793	38.14	41.582	46.434	43.82	44.039	44.414	40.862
FBgn0036712	brv2		protein_coding	8.437	3.63e-14	3.017	0.006833	3.372	0.003592	1.784	0.01366	3.777	4.322	1.884	2.228	0	0	0.017	0	0	0	0	0.065	0.147	0.46	0.153	0.208	0.406	0.337	0	0.181
FBgn0069923	CG41128		protein_coding	-1.241	4.076e-14	-0.09045	0.4993	-0.2227	0.1158	-0.3679	0.02363	49.823	49.043	66.291	71.234	139.738	126.05	164.834	143.772	193.353	177.62	188.468	163.771	169.697	124.676	112.083	172.095	121.746	94.337	131.855	150.154
FBgn0030357	Sclp		protein_coding	2.527	4.116e-14	0.09293	0.4163	0.03951	0.7997	-0.0333	0.8924	5.496	2.488	2.291	2.692	0.378	0.625	0.409	0.691	1.491	2.038	1.163	2.157	3.622	1.684	1.223	2.075	2.135	0.769	1.071	2.089
FBgn0039025	Usp12-46		protein_coding	1.148	4.166e-14	0.8762	1.638e-05	0.9373	2.217e-06	0.8673	2.827e-06	37.173	33.861	41.806	41.201	17.585	19.101	15.392	15.651	15.371	18.91	18.093	34.063	35.31	29.493	36.544	37.679	29.303	40.748	39.387	22.624
FBgn0002719	Men		protein_coding	-1.955	4.334e-14	-0.243	0.1028	-1.456	8.272e-06	-1.142	0.0002099	5.29	6.443	5.932	4.881	20.218	25.258	24.414	20.891	68.299	41.467	25.257	29.742	28.41	20.527	16.693	12.091	17.732	11.777	13.954	29.004
FBgn0038302	CG4210	SAT2,SAT1	protein_coding	-2.728	4.82e-14	-0.8826	0.01644	-0.09735	0.4891	-0.1835	0.3339	2.247	1.103	1.816	0.829	15.156	5.346	9.729	11.386	13.096	14.429	5.045	4.076	4.41	3.988	10.103	8.12	4.44	6.635	5.944	8.507
FBgn0010770	ppan	PPAN	protein_coding	-1.003	5.116e-14	-0.172	0.1364	-0.2198	0.1037	-0.3092	0.0366	22.482	22.916	16.471	14.835	44.382	41.545	34.815	36.454	38.137	40.038	30.941	32.623	27.176	23.465	31.428	27.83	24.103	32.08	24.615	24.849
FBgn0052251	Claspin		protein_coding	-0.8439	5.261e-14	-0.05634	0.7339	-0.3068	0.011	-0.5504	1.981e-05	16.925	13.557	20.207	18.326	31.047	29.19	33.711	32.582	36.656	38.527	31.16	33.899	32.773	30.521	24.662	25.314	27.896	24.285	22.576	21.174
FBgn0260965	CG42588		protein_coding	-0.9604	5.454e-14	-0.07185	0.641	-0.1945	0.15	-0.07121	0.7202	2.177	2.361	2.298	2.24	4.228	4.892	4.501	4.483	5.039	4.02	3.331	3.411	3.993	3.378	3.372	2.418	3.786	2.939	3.937	4.295
FBgn0052687	CG32687	LRRC58	protein_coding	1.58	6.093e-14	0.4248	0.02566	0.3169	0.05542	0.2471	0.1739	13.031	11.61	19.727	21.01	5.391	5.082	5.023	5.777	3.824	5.807	6.284	10.358	8.914	8.844	7.957	7.728	10.25	6.173	8.631	7.604
FBgn0050355	CG30355		protein_coding	5.084	6.512e-14	4.983	5.658e-05	4.488	0.0002171	3.476	0.001256	7.143	5.542	7.917	7.775	0.174	0.041	0.323	0.196	0	0	0.137	6.375	5.545	1.345	4.587	3.114	2.262	3.899	1.741	0.894
FBgn0266570	CG2982	RIOX1	protein_coding	-1.432	8.578e-14	-0.06931	0.628	-0.2436	0.09849	-0.08309	0.702	22.063	21.277	27.289	21.747	51.978	62.633	72.342	69.197	98.621	90.494	57.293	73.093	79.313	50.687	57.886	56.329	53.602	50.015	56.48	112.865
FBgn0264679	CR43964		ncRNA	-4.487	9.254e-14	0.01863	0.9121	-0.1213	0.3892	-0.03851	0.8695	0.171	0.168	0.033	0.042	3.021	3.702	2.166	1.158	2.87	2.462	3.128	4.445	1.936	3.589	1.456	0.989	2.373	2.494	2.714	2.33
FBgn0029824	CG3726		protein_coding	-1.666	9.303e-14	-0.4148	0.02914	-0.2086	0.1559	-0.1873	0.315	13.56	20.077	11.743	11.234	51.67	65.049	32.757	35.658	33.097	32.533	52.489	20.04	20.368	26.675	28.131	24.911	26.174	29.305	30.495	30.185
FBgn0038140	PK2-R1		protein_coding	3.28	9.303e-14	0.3302	0.1299	0.2153	0.2151	1.895	0.0008139	9.653	10.331	5.113	4.289	0.654	1.022	0.426	0.682	0.736	0.234	0.336	1.403	1.051	0.988	0.264	1.207	1.288	2.902	1.758	1.487
FBgn0030841	CG8568		protein_coding	-3.839	1.009e-13	-0.2301	0.1926	-0.1665	0.2884	-1.837	0.001618	0.74	0.568	0.543	0.451	17.263	6.595	6.358	5.812	6.029	8.756	8.497	3.559	3.54	2.143	4.521	5.44	1.2	3.419	1.038	0.646
FBgn0037291	CG14662		protein_coding	4.814	1.039e-13	1.981	0.008171	1.991	0.006774	2.059	0.003438	2.256	2.332	1.263	1.946	0.065	0.093	0.061	0.018	0.119	0.138	0.128	0.927	0.925	0.894	0.816	1.292	0.628	0.133	1.962	0.58
FBgn0035989	CG3967		protein_coding	1.06	1.112e-13	0.8431	7.783e-06	0.8269	6.219e-06	0.9227	1.329e-07	27.325	33.261	27.112	29.737	12.757	19.648	11.756	10.704	15.174	16.181	20.194	37.012	28.72	29.242	29.366	32.645	33.027	31.62	29.706	40.615
FBgn0036576	CG5151		protein_coding	-0.7167	1.2e-13	-0.07034	0.6415	-0.2422	0.0375	-0.1652	0.2163	10.705	9.46	8.962	9.061	15.311	15.86	15.73	16.969	12.129	14.293	10.703	11.348	11.735	10.529	10.549	8.394	10.27	9.271	10.49	11.924
FBgn0263492	CR43481		ncRNA	2.551	1.222e-13	0.126	0.3184	0.05766	0.6925	1.07	0.006569	2.583	1.435	1.981	2.034	0.226	0.149	0.432	0.495	0.575	0.317	0.336	0.958	0.758	0.563	0.625	0.636	0.407	0.459	1.127	1.579
FBgn0034308	CG10915		protein_coding	0.4721	1.238e-13	0.08133	0.4971	0.1029	0.3276	0.1513	0.1289	33.905	35.28	35.716	34.362	24.114	25.371	24.588	25.116	24.172	22.417	22.801	26.107	26.853	22.92	28.386	25.054	23.609	26.065	25.377	26.554
FBgn0025832	Fen1	FEN1	protein_coding	-0.8345	1.308e-13	-0.1079	0.4049	-0.02766	0.8783	-0.548	4.502e-05	24.406	23.362	24.127	23.281	47	39.933	44.216	42.224	37.593	39.177	44.902	29.812	33.829	39.418	35.528	40.011	41.271	23.567	22.682	30.135
FBgn0028744	CG5033	BOP1	protein_coding	-0.8067	1.386e-13	-0.05697	0.73	-0.1763	0.1684	-0.1805	0.1992	32.479	33.689	36.974	33.464	55.844	61.118	62.796	64.412	70.486	64.605	47.182	59.219	60.643	46.799	50.561	53.262	45.832	53.048	53.632	47.708
FBgn0037292	plh		protein_coding	5.868	1.658e-13	0.6325	0.08242	2.752	0.001465	2.771	0.0006586	4.72	2.557	3.461	3.411	0.145	0.034	0	0	0.132	0.306	0.114	1.027	0.769	0.948	3.015	0.546	1.965	0.885	3.48	1.151
FBgn0015239	Hr78		protein_coding	0.4369	1.66e-13	0.1209	0.2169	0.1463	0.1233	0.306	0.0001292	58.475	53.522	53.438	50.926	39.969	37.434	39.204	41.274	38.433	35.077	37.578	37.078	42.637	44.281	39.412	41.04	44.682	50.158	47.339	43.984
FBgn0032689	CG10413		protein_coding	0.8916	1.793e-13	0.5595	0.000167	0.5783	5.85e-05	0.6336	6.534e-06	50.471	44.48	49.116	48.112	25.499	26.952	23.306	25.431	23.313	24.334	20.988	39.399	37.414	31.432	40.154	35.693	34.517	43.878	40.179	30.671
FBgn0020660	eIF4B		protein_coding	4.311	1.808e-13	0.08194	0.4909	2.044	0.001223	0.1168	0.5295	1.329	0.991	0.619	0.359	0.068	0.016	0	0.057	0.062	0.287	0.08	0.321	0.181	0.323	0.66	0.576	0.845	0.138	0.34	0.191
FBgn0263507	CR43496		ncRNA	1.011	1.871e-13	0.3181	0.01958	0.07663	0.6405	0.04582	0.8459	19.404	22.343	20.224	20.714	11.163	11.35	8.027	9.388	9.046	11.47	10.479	17.16	14.951	15.242	11.718	10.884	12.812	12.676	10.083	10.801
FBgn0035782	CG14835		protein_coding	5.953	1.975e-13	0.2329	0.236	1.164	0.03343	2.59	0.001676	5.943	3.5	5.714	5.811	0	0.094	0	0.168	0.181	0.558	0	0.937	0.878	0.825	0.825	1.868	1.457	1.616	3.572	1.575
FBgn0043791	phu		protein_coding	5.213	2.156e-13	2.94	0.0003431	3.703	1.71e-06	1.468	0.01076	2.881	1.966	0.985	0.978	0.018	0	0.065	0.079	0.192	0.296	0.028	1.659	1.739	1.21	3.214	2.446	2.063	1.144	1.194	0.361
FBgn0015773	NetA	NTN3,NTN1	protein_coding	-2.585	2.196e-13	-1.622	0.0003538	-0.6815	0.02595	-2.059	2.168e-06	0.662	0.795	0.667	0.714	5.46	2.458	4.817	5.427	3.135	6.107	8.986	1.34	2.249	1.72	2.441	3.461	1.922	1.513	1.33	1.169
FBgn0262619	DNA-ligI	LIG1	protein_coding	-0.6389	2.197e-13	-0.09888	0.4323	-0.2714	0.009797	-0.4127	9.879e-05	25.158	27.846	31.959	28.549	42.595	40.764	50.208	46.797	48.763	53.616	43.774	40.778	49.256	39.343	36.782	38.014	38.911	32.242	33.105	38.571
FBgn0000108	Appl		protein_coding	3.107	2.324e-13	0.09544	0.4163	0.06964	0.6147	0.467	0.06947	10.685	8.052	5.092	3.629	0.851	1.302	0.412	0.375	1.399	1.138	0.37	2.589	1.812	0.864	1.818	1.523	0.903	3.628	2.459	0.737
FBgn0267278	CR45714		ncRNA	7.589	2.785e-13	0.2214	0.2728	0.09473	0.5406	0.3654	0.1654	4.012	4.301	2.148	2.544	0	0.029	0	0	0	0	0.048	0	0.436	0.146	0	0.232	0.07	1.004	0	0.058
FBgn0040918	schlank	CERS6,CERS5	protein_coding	-0.6755	2.977e-13	-0.2299	0.01877	-0.5137	2.123e-06	-0.6061	2.775e-08	50.224	46.898	55.645	55.007	85.32	65.534	94.289	93.109	106.637	103.654	78.335	75.697	78.697	70.116	64.306	62.5	64.089	61.009	59.525	60.454
FBgn0039703	CG7829		protein_coding	6.647	3.054e-13	1.839	0.02297	2.248	0.01224	2.255	0.007764	5.496	5.189	4.417	4.76	0.067	0.063	0	0	0.122	0	0	0.791	0	1.274	0.557	0.126	1.514	0.273	0.804	1.001
FBgn0266756	btsz		protein_coding	3.524	3.33e-13	1.949	0.001276	0.7515	0.03883	1.381	0.005083	0.837	0.65	0.894	0.755	0.055	0.093	0.054	0.047	0.524	0.298	0.116	2.064	1.894	0.463	1.143	1.182	0.521	0.832	1.838	0.784
FBgn0031282	Pex12	PEX12	protein_coding	-1.335	3.335e-13	-0.7307	0.00199	-0.7622	0.001003	-0.4629	0.01109	5.22	7.674	6.076	6.415	22.139	15.889	13.749	14.308	9.792	12.327	13.399	7.487	5.388	6.537	7.412	6.551	5.195	8.603	8.64	5.137
FBgn0032682	grnd		protein_coding	2.959	4.027e-13	2.375	1.124e-05	3.108	1.3e-09	2.138	4.657e-05	1.338	2.483	1.486	1.644	0.156	0.309	0.077	0.28	0.737	0.307	0.196	2.721	2.093	1.887	5.181	4.102	1.794	2.155	1.931	1.832
FBgn0028671	Vha100-1		protein_coding	0.5776	4.047e-13	0.0879	0.4965	0.2234	0.03398	0.3165	0.002031	38.495	37.353	40.991	40.754	24.495	28.182	24.676	26.475	22.666	23.88	30.741	29.676	25.252	31.377	33.244	29.636	32.427	33.102	33.718	33.496
FBgn0032381	Mal-B1		protein_coding	8.178	4.14e-13	0.1407	0.3658	0.05492	0.7024	0.07773	0.6776	2.206	1.493	2.158	2.215	0	0	0	0	0.197	0.101	0	0.681	0.128	0.171	0.2	0.136	0.163	0	0.216	0.168
FBgn0011591	fng		protein_coding	2.956	4.636e-13	0.1907	0.2095	0.1371	0.339	0.4344	0.07504	102.225	89.078	113.513	128.096	14.226	15.125	10.388	11.967	16.778	20.187	7.732	45.172	36.491	12.019	32.211	34.615	11.763	41.851	44.46	12.251
FBgn0015380	drl		protein_coding	-3.044	4.879e-13	-0.09426	0.4139	-0.04327	0.7795	-0.1864	0.3254	0.302	0.194	0.144	0.202	2.118	1.354	1.616	2.229	2.877	2.133	2.515	1.891	1.304	1.302	2.512	1.943	1.689	1.372	2.654	0.787
FBgn0037081	barc		protein_coding	0.6666	4.879e-13	0.1519	0.1721	0.2718	0.01382	0.4053	0.0002993	70.215	62.226	60.467	55.81	37.473	43.529	37.575	35.016	35.356	34.584	37.698	41.935	44.964	42.541	41.308	50.53	47.119	44.579	53.123	51.562
FBgn0035049	Mmp1		protein_coding	2.496	5.217e-13	0.4445	0.0613	0.1179	0.4025	1.318	0.001155	96.207	50.3	85.115	75.206	9.831	12.79	13.205	15.349	12.743	7.941	5.081	18.567	15.436	23.115	6.855	8.262	24.61	19.905	19.396	36.835
FBgn0011762	DNApol-alpha50	PRIM1	protein_coding	-0.8625	5.534e-13	-0.04261	0.8313	-0.09179	0.5384	-0.482	0.0004651	13.187	12.304	16.863	15.886	25.038	27.156	28.365	28.053	30.132	31.418	36.524	28.25	30.227	32.688	31.319	24.002	31.587	24.091	18.087	23.042
FBgn0039795	Spn100A		protein_coding	2.667	5.679e-13	1.253	0.006696	2.11	1.137e-05	1.875	6.76e-05	14.831	11.983	9.044	9.396	2.343	2.153	0.893	1.246	2.396	1.76	0.857	3.334	6.414	5.376	8.185	8.877	6.668	8.49	9.369	2.937
FBgn0053213	CG33213		protein_coding	-1.288	5.776e-13	-0.04022	0.833	0.03508	0.8517	-0.2414	0.1625	4.926	4.783	5.307	4.369	12.429	10.049	13.57	12.747	12.756	14.525	13.128	9.539	11.757	14.582	14.744	15.3	13.455	11.655	9.1	9.884
FBgn0035541	CG15019		protein_coding	-0.73	5.796e-13	-0.1893	0.07485	-0.1817	0.1433	-0.2437	0.05359	86.816	79.549	81.327	78.889	152.72	140.897	125.982	132.711	170.681	152.639	142.419	119.871	123.092	125.921	123.89	133.863	126.161	152.955	127.354	100.555
FBgn0030218	CG1628		protein_coding	-1.186	5.995e-13	-0.1491	0.2075	-0.2544	0.07533	-0.4315	0.01052	3.357	3.658	4.029	2.878	7.996	7.294	8.335	9.124	11.328	9.655	8.174	8.373	6.442	6.741	5.005	6.672	8.154	6.166	4.834	7.344
FBgn0036433	CG9628		protein_coding	-1.794	6.503e-13	-1.051	0.001363	-1.237	0.000159	-2.538	3.158e-16	11.555	19.012	11.515	11.662	47.775	52.072	47.218	46.354	32.019	40.953	40.766	21.089	14.521	14.632	14.303	16.284	14.659	9.257	6.323	3.937
FBgn0003257	r-l		protein_coding	-0.7366	6.809e-13	-0.6083	3.451e-06	-0.6647	2.337e-07	-0.6489	1.375e-07	23.76	25.429	22.648	21.892	37.026	38.261	43.494	40.737	52.331	50.653	38.052	30.978	30.975	27.402	29.258	31.205	25.32	23.368	27.002	33.185
FBgn0011760	ctp	DYNLL1	protein_coding	-1.027	6.83e-13	-0.0007355	1	-0.1167	0.4284	-0.1697	0.3059	64.614	50.576	38.636	42.805	96.328	86.492	119.606	109.14	142.546	141.942	117.334	140.274	148.047	112.891	113.714	118.539	105.773	123.382	115.855	97.078
FBgn0033741	CG8545		protein_coding	-0.8366	7.305e-13	-0.2167	0.04669	-0.3573	0.003965	-0.4078	0.001971	60.141	60.857	51.699	49.327	94.615	108.92	101.976	100.174	114.241	115.046	83.161	82.901	82.921	70.041	78.704	74.076	67.047	75.01	78.449	65.645
FBgn0035393	CG16753		protein_coding	-0.7768	7.77e-13	-0.1666	0.1398	-0.3013	0.01382	-0.524	7.578e-05	36.777	32.358	30.546	29.501	64.136	56.052	51.579	53.614	45.827	52.485	56.726	38.407	45.119	40.38	33.227	40.433	39.927	25.783	33.721	38.048
FBgn0051674	CG31674		protein_coding	-2.887	8.953e-13	-0.11	0.3629	-1.239	0.006972	-1.369	0.002508	3.203	2.436	4.194	3.149	16.586	7.119	41.568	38.389	34.158	23.136	19.276	11.861	13.417	16.93	6.253	6.848	11.056	6.676	2.562	13.544
FBgn0033313	Cirl		protein_coding	1.063	8.956e-13	0.1332	0.2692	0.2326	0.09218	0.2956	0.05737	96.503	84.874	95.755	100.092	44.562	41.847	42.187	46.964	34.613	38.651	35.448	50.69	46.557	42.244	58.604	44.785	44.149	58.406	59.758	29.284
FBgn0003888	betaTub60D		protein_coding	2.11	9.122e-13	0.05215	0.6871	-0.05918	0.7089	0.1542	0.4272	343.45	184.547	346.247	316.031	42.7	46.37	92.678	81.337	171.82	128.675	59.955	178.419	175.348	115.761	95.056	90.861	106.536	159.842	151.5	175.565
FBgn0037963	Cad87A		protein_coding	1.078	9.922e-13	0.6812	0.0003679	0.5199	0.001623	0.3958	0.01116	31.135	39.058	52.956	53.964	19.419	25.169	17.616	19.383	27.347	28.028	19.259	43.766	41.662	42.159	44.563	32.417	44.163	40.433	38.503	31.153
FBgn0083228	Frq2		protein_coding	3.533	1.097e-12	-0.02115	0.8873	-0.2469	0.192	-0.1405	0.453	1.813	0.756	1.429	1.504	0.08	0.13	0.099	0.122	0.238	0.938	0.444	0.343	0.847	0.121	0.201	0.218	0.229	0.118	0.464	0.339
FBgn0001258	ImpL3		protein_coding	-3.277	1.112e-12	-0.02028	0.897	-0.1057	0.4446	0.03673	0.8721	24.377	14.331	20.309	22.662	318.917	53.807	237.333	253.827	72.237	49.725	27.235	47.635	45.269	29.051	23.81	34.982	27.802	29.196	27.879	112.482
FBgn0004556	Dbp73D	DDX51	protein_coding	-0.8387	1.132e-12	-0.1977	0.07461	-0.2533	0.04622	-0.3127	0.02185	18.771	18.864	18.572	16.712	34.843	38.604	28.682	31.338	36.066	38.469	28.824	28.874	25.292	24.73	26.349	27.801	24.107	22.173	31.199	23.72
FBgn0033473	CG12128	SPOUT1	protein_coding	-0.5771	1.171e-12	-0.1457	0.1868	-0.159	0.1804	0.0006216	1	7.483	8.362	7.302	7.719	12.942	11.56	11.291	11.101	10.309	10.061	8.685	8.448	7.341	8.501	7.415	8.627	8.355	8.835	8.786	10.654
FBgn0031894	CG4496		protein_coding	0.8906	1.399e-12	-0.01748	0.9565	-0.06014	0.7213	-0.1505	0.369	11.921	9.053	10.756	11.425	5.716	4.807	5.577	6.564	8.531	8.352	6.892	9.387	6.863	6.804	6.363	7.881	7.135	6.838	7.144	6.319
FBgn0027108	Inx2		protein_coding	1.328	1.453e-12	0.03663	0.8518	0.03511	0.8515	0.3445	0.04575	102.235	66.799	93.274	86.051	34.573	28.213	36.228	35.661	38.899	40.228	36.713	50.474	39.789	38.429	40.037	45.478	39.315	73.98	65.627	32.607
FBgn0261535	l(2)34Fd	NOL10	protein_coding	-0.7148	1.453e-12	-0.2455	0.01865	-0.1154	0.3922	-0.273	0.03219	15.261	19.444	13.919	13.39	27.355	27.529	24.892	24.276	22.011	27.341	19.602	16.369	19.088	16.238	20.39	20.574	19.157	17.662	18.594	17.734
FBgn0035083	Tina-1	GGACT	protein_coding	-2.022	1.466e-12	-0.04794	0.7174	-0.1644	0.255	-0.9043	0.002926	14.324	17.47	30.793	30.386	97.802	31.149	140.118	126.117	103.837	80.075	58.118	66.7	75.228	49.367	53.385	56.088	46.411	40.271	43.264	22.234
FBgn0000578	ena		protein_coding	-0.6994	1.589e-12	-0.04641	0.7996	-0.1264	0.3278	0.008037	0.9743	12.586	12.852	11.745	10.624	17.3	18.833	20.998	22.118	21.994	22.36	18.553	21.609	17.86	19.29	20.326	16.956	17.398	22.785	21.097	19.632
FBgn0040321	GNBP3		protein_coding	-2.643	1.762e-12	-0.08083	0.4758	-0.05798	0.6999	-0.372	0.09036	2.058	1.932	1.295	1.845	20.447	7.891	9.487	9.711	21.702	14.537	24.92	12.71	13.978	11.877	18.476	15.434	13.17	13.562	15.034	3.071
FBgn0011829	Ret	RET	protein_coding	1.67	1.77e-12	0.5783	0.01511	0.9359	0.001376	0.2919	0.1131	64.17	65.825	109.285	119.532	21.17	45.069	20.476	22.26	24.365	32.298	39.641	54.235	53.786	74.798	65.93	63.139	76.852	54.138	53.86	37.645
FBgn0038965	mats	MOB1B,MOB1A	protein_coding	0.4552	1.868e-12	0.06676	0.6097	0.06377	0.5692	0.04002	0.7827	56.018	50.495	57.951	61.721	40.202	42.493	39.987	39.998	45.942	39.928	41.534	49.319	44.962	43.111	44.909	44.968	45.968	34.437	45.726	47.652
FBgn0034479	CG8654		protein_coding	5.026	1.921e-12	2.304	0.004986	2.577	0.002068	4.106	4.604e-07	1.474	1.231	1.933	2.114	0.01	0.078	0.051	0.035	0.187	0.232	0.016	1.652	1.128	0.611	1.369	2.091	0.302	4.272	3.992	1.384
FBgn0010226	GstS1	HPGDS	protein_coding	1.251	2.321e-12	-0.03702	0.8522	-0.08779	0.5831	-0.1915	0.2796	263.179	183.386	305.522	305.301	72.15	109.165	132.525	117.089	149.291	149.252	167.996	146.902	135.097	140.491	135.018	133.781	126.032	141.111	144.056	85.388
FBgn0032553	CG4480		protein_coding	6.425	2.391e-12	4.301	3.667e-07	4.857	2.243e-09	5.411	6.61e-12	3.001	3.223	1.096	1.475	0	0.021	0.028	0.025	0.247	0.127	0	3.309	1.679	2.524	3.885	3.997	3.624	9.566	5.242	2.87
FBgn0031568	CG10019		protein_coding	2.069	2.403e-12	1.109	0.003095	1.07	0.003069	0.6907	0.01053	22.479	20.8	40.148	39.314	8.857	6.93	5.719	6.404	6.472	7.02	10.121	21.539	20.311	17.124	22.812	19.445	15.916	19.357	21.998	9.217
FBgn0040257	Ugt86Dc		protein_coding	7.575	2.59e-12	0.0711	0.597	0.3517	0.1703	0.2829	0.224	2.616	2.421	2.143	1.811	0	0	0	0.023	0.149	0	0	0.194	0.145	0.049	0.227	0.231	0.232	0	0.41	0.077
FBgn0026015	Top3beta		protein_coding	-0.7598	2.673e-12	-0.1435	0.2198	-0.08751	0.5432	-0.3804	0.002425	73.907	93.306	78.772	81.126	140.934	136.337	145.176	144.184	91.592	96.572	112.949	73.002	83.983	90.606	94.679	83.976	91.114	79.793	72.967	65.163
FBgn0039417	CG6073	HGH1	protein_coding	-0.7492	2.722e-12	-0.004301	0.9941	0.02616	0.886	-0.03704	0.8606	12.684	11.446	12.07	9.955	19.367	20.19	20.746	18.895	17.437	19.229	15.464	17.28	19.082	15.353	16.115	19.908	17.615	16.169	13.63	19.406
FBgn0034259	P32	C1QBP	protein_coding	-0.8804	2.933e-12	-0.03227	0.8864	-0.00638	0.9812	-0.00585	0.9869	70.609	97.986	57.019	53.697	137.531	147.042	121.094	122.016	128.478	109.98	117.115	114.423	106.652	113.87	105.433	126.909	119.174	99.879	121.485	130.392
FBgn0038306	Art3	PRMT3	protein_coding	-0.7349	3.039e-12	-0.06992	0.6514	-0.1325	0.3188	-0.2733	0.03526	22.466	22.487	23.84	20.985	38.368	39.529	38.283	36.619	38.551	36.502	31.31	38.524	27.444	29.895	29.651	34.588	26.776	26.708	28.562	27.623
FBgn0039756	CG9743		protein_coding	-1.691	3.112e-12	-1.958	1.01e-10	-1.569	3.422e-07	-2.31	3.141e-14	3.144	4.716	3.402	3.949	11.891	9.841	14.614	14.717	14.224	18.839	17.304	4.099	3.938	4.305	5.022	6.96	4.262	4.301	3.169	2.572
FBgn0266399	CR45039		ncRNA	4.116	3.188e-12	4.372	1.981e-07	4.571	2.473e-08	5.197	5.566e-11	20.393	21.741	12.387	13.61	0.343	1.512	0.849	0.772	0	0.161	0.987	19.44	11.122	7.064	16.484	17.428	10.588	33.972	31.094	5.872
FBgn0003525	stg		protein_coding	-1.671	3.214e-12	-0.14	0.2424	-0.124	0.3931	-0.1992	0.2868	52.492	89.013	38.115	40.673	208.827	227.19	140.864	149.42	148.043	169.469	219.607	93.751	91.172	171.295	112.855	110.538	173.295	125.45	99.62	170.528
FBgn0038257	smp-30		protein_coding	4.306	3.642e-12	2.487	0.001598	2.931	0.0001709	0.3066	0.1807	9.915	13.906	12.134	12.398	0.569	0.352	0.68	0.552	1.859	0.497	0.678	3.801	3.194	15.812	4.354	6.057	18.886	2.237	2.512	3.152
FBgn0001197	His2Av	H2AFZ,H2AFV	protein_coding	-0.6285	3.928e-12	-0.1238	0.2933	-0.1225	0.3207	-0.2413	0.0357	133.42	133.391	136.015	127.924	223.2	179.829	215.579	218.349	199.451	196.109	214.751	163.396	178.519	183.543	165.179	193.051	177.589	154.191	159.198	183.454
FBgn0026702	l(1)G0045		protein_coding	-0.7085	4.47e-12	-0.2439	0.02045	-0.3079	0.009003	-0.4512	0.0003276	9.774	11.007	10.395	9.082	15.831	17.856	17.179	16.488	16.67	16.084	15.152	10.503	11.821	13.254	10.179	11.027	13.581	10.058	10.635	11.625
FBgn0038053	CG18549	MFSD11	protein_coding	0.7204	4.47e-12	0.03613	0.8692	0.2316	0.07082	0.1224	0.4599	10.664	11.385	11.027	13.033	6.953	5.89	6.884	7.713	6.893	6.012	8.738	5.934	8.254	8.841	9.682	9.519	9.398	6.907	9.397	8.136
FBgn0264672	Eogt	EOGT	protein_coding	0.5904	4.486e-12	0.09431	0.4829	0.2242	0.06144	0.4978	2.162e-05	22.641	25.059	23.356	24.152	16.784	15.391	14.633	15.28	9.048	10.58	12.089	11.238	12.316	12.972	12.515	13.499	14.148	13.958	16.373	16.958
FBgn0085358	Diedel3		protein_coding	5.121	4.935e-12	3.21	0.002664	3.58	0.0008108	1.952	0.008882	2.161	2.102	3.025	4.064	0.06	0.08	0.104	0.027	0.131	0.034	0	0.966	1.064	0.4	1.134	1.267	0.516	0.294	1.154	0.112
FBgn0040066	wds	WDR5,WDR5B	protein_coding	-0.4739	4.949e-12	-0.1702	0.06401	-0.1011	0.3477	-0.2484	0.007725	51.224	49.179	47.615	46.076	67.974	68.904	69.577	66.909	65.489	60.691	56.19	46.652	53.234	53.605	55.694	56.826	52.559	54.506	42.819	52.711
FBgn0036886	CG9300		protein_coding	-0.6062	5.022e-12	-0.1525	0.164	-0.2136	0.06003	-0.2628	0.02186	21.681	25.654	26.107	27.868	38.005	42.534	39.238	37.775	39.604	34.851	29.985	28.724	30.743	27.537	28.511	30.311	26.07	30.249	27.66	26.144
FBgn0036801	MYPT-75D	PPP1R16B,PPP1R16A	protein_coding	-0.94	5.298e-12	-0.07978	0.5824	-0.1969	0.1507	-1.047	9.44e-09	2.094	2.399	3.066	3.836	4.94	4.732	6.655	6.266	5.675	5.62	6.058	5.104	5.579	4.301	5.017	4.233	4.258	3.018	2.563	2.687
FBgn0050456	CG30456		protein_coding	1.25	5.314e-12	0.4379	0.01396	0.3552	0.02862	0.3884	0.02577	23.001	21.135	24.171	26.62	10.004	8.171	9.523	10.977	7.601	8.514	8.226	13.663	12.499	14.461	11.114	12.56	14.725	14.802	13.305	9.782
FBgn0001330	kz	DHX37	protein_coding	-0.7055	5.769e-12	-0.0689	0.6546	-0.2132	0.08418	-0.3161	0.01189	8.347	10.522	10.699	10.072	15.943	17.892	16.36	16.082	16.891	17.541	12.553	14.826	14.375	13.1	14.268	11.721	11.642	9.083	13.754	12.036
FBgn0052075	CG32075		protein_coding	-0.6672	5.769e-12	-0.1001	0.4393	-0.1665	0.1809	-0.123	0.3967	15.592	12.337	14.725	14.162	23.625	23.864	21.792	22.533	26.985	25.591	22.116	22.119	22.721	20.232	16.788	24.11	20.854	19.743	24.818	21.522
FBgn0264618	CR43958		ncRNA	0.7858	6.207e-12	0.7551	2.33e-06	0.7781	5.117e-07	0.5947	2.728e-05	46.972	51.289	49.615	59.243	30.252	29.28	29.434	28.405	25.895	23.085	31.361	57.214	38.661	44.748	49.895	39.977	53.04	47.879	45.114	40.739
FBgn0032997	CG17486	ASNSD1	protein_coding	-0.6725	8.446e-12	0.02821	0.9034	-0.08663	0.5322	-0.1705	0.2019	27.846	33.3	34.167	33.166	47.579	60.784	51.133	50.083	53.074	49.961	63.105	64.549	48.924	60.392	46.337	49.665	53.634	49.284	50.165	44.312
FBgn0040322	GNBP2		protein_coding	-2.192	8.446e-12	-0.01763	0.9329	-0.1101	0.4352	-0.2123	0.2635	0.908	1.303	0.594	0.795	4.555	4.24	4.286	4.315	6.426	5.76	4.379	6.07	6.319	2.744	6.282	3.28	2.313	2.66	3.921	4.068
FBgn0046214	vig2	SERBP1	protein_coding	-0.5106	8.67e-12	-0.3598	1.629e-05	-0.2378	0.01224	-0.4065	6.281e-06	229.499	215.823	204.9	189.02	296.939	266.05	339.959	312.541	338.857	352.52	291.499	226.386	246.353	248.336	277.461	280.708	243.407	237.065	247.835	233.285
FBgn0011224	heph	PTBP1,PTBP2,PTBP3	protein_coding	1.113	8.792e-12	0.9537	8.444e-06	0.9849	2.622e-06	1.117	2.904e-08	19.902	17.621	18.127	18.99	6.893	11.411	7.548	7.582	9.826	9.28	7.601	21.586	16.941	14.413	20.736	18.125	15.485	22.117	22.152	15.433
FBgn0040777	CG14767		protein_coding	0.7729	9.203e-12	0.1131	0.3736	0.2794	0.02282	0.2587	0.05435	255.001	250.539	288.254	300.501	156.91	182.019	134.941	151.335	122.916	118.33	155.203	155.289	138.362	175.372	175.746	168.691	185.242	174.852	182.68	144.998
FBgn0031657	CG3756	POLR1C	protein_coding	-0.7613	9.896e-12	-0.1855	0.09581	-0.1054	0.4595	-0.2573	0.06384	21.415	23.702	21.186	18.568	36.257	37.194	36.493	37.537	36.873	30.071	32.332	24.11	26.385	26.083	30.824	33.516	22.997	23.549	25.407	28.018
FBgn0053170	CG33170		protein_coding	-0.7475	1.01e-11	-0.06788	0.6666	-0.4614	0.0002769	-0.2626	0.04974	12.757	11.291	13.829	13.008	23.02	18.649	22.723	23.096	29.16	34.252	26.949	23.271	29.711	27.677	18.008	19.704	21.5	18.46	22.617	27.554
FBgn0029943	Atg5	ATG5	protein_coding	1.044	1.013e-11	0.4392	0.009552	0.97	8.258e-06	0.6424	0.0005672	11.709	9.407	9.749	10.759	4.452	6.646	4.28	4.049	4.703	5.189	5.939	9.366	8.973	7.946	12.276	8.592	11.668	11.076	11.344	6.977
FBgn0032886	CG9328		protein_coding	-2.367	1.047e-11	-0.3366	0.09202	-0.3453	0.09074	-1.057	0.004034	6.846	10.112	7.257	9.031	58.626	45.52	39.052	39.505	38.764	37.451	87.657	16.242	16.891	44.376	19.701	17.597	43.301	21.98	18.301	21.205
FBgn0038912	CG6656		protein_coding	-1.588	1.159e-11	-0.8672	0.002558	-1.04	0.0004174	-2.304	1.289e-15	2.761	2.341	3.824	4.764	11.731	10.439	10.128	10.382	19.539	18.966	22.278	7.612	11.777	10.23	12.465	6.704	8.574	2.935	4.665	3.881
FBgn0051522	CG31522	ELOVL1,ELOVL7	protein_coding	-1.472	1.179e-11	-0.1663	0.1745	-0.2029	0.1631	-0.9983	0.000108	16.106	18.971	25.46	31.717	73.711	39.557	72.318	79.176	49.208	53.41	45.634	32.82	35.056	30.676	35.711	32.045	33.203	24.178	27.151	16.57
FBgn0031836	CG11050		protein_coding	-0.7925	1.198e-11	0.01374	0.9653	-0.2239	0.08064	-0.2543	0.06601	28.783	26.897	32.387	33.806	58.035	42.395	59.064	56.971	57.241	59.693	46.011	56.702	65.653	44.525	40.11	45.697	40.999	37.521	41.164	49.058
FBgn0051358	CG31358	STOML3	protein_coding	5.005	1.201e-11	4.064	0.0004847	4.478	6.974e-05	2.959	0.002202	0.705	0.927	1.394	1.074	0.036	0.017	0.033	0.02	0	0.025	0.028	0.809	0.542	0.536	1.551	0.645	0.408	0.441	0.685	0.118
FBgn0033557	CG12325	PWP2,FP565260.1	protein_coding	-1.158	1.245e-11	-0.1372	0.2468	-0.2653	0.06677	-0.4402	0.009517	9.089	8.603	7.904	7.843	17.353	22.597	18.77	18.261	30.383	26.323	17.498	19.882	20.624	14.858	19.622	16.854	14.794	16.393	17.373	13.664
FBgn0035524	CG11583	BRIX1	protein_coding	-0.617	1.332e-11	-0.235	0.01652	-0.3287	0.002068	-0.4509	5.125e-05	49.469	47.503	42.747	41.538	71.738	73.704	69.712	68.23	78.884	75.821	61.881	51.643	60.56	54.638	51.229	60.995	47.923	44.188	48.115	55.756
FBgn0259822	Ca-beta		protein_coding	2.787	1.38e-11	1.184	0.01133	1.534	0.00292	1.919	0.0001456	2.599	2.299	2.633	2.33	0.278	0.777	0.097	0.159	0.399	0.451	0.688	1.701	1.274	2.046	1.498	1.974	2.14	3.569	2.27	1.14
FBgn0050424	CG30424		protein_coding	-2.117	1.468e-11	-0.06967	0.5543	-0.2238	0.1599	-0.4809	0.03819	0.845	1.376	1.07	1.026	6.722	2.886	4.606	5.736	6.674	5.423	4.676	4.959	4.052	2.949	2.646	4.311	2.673	2.02	2.672	3.494
FBgn0260722	CR42549		ncRNA	0.7316	1.591e-11	0.1646	0.1454	0.3313	0.006277	0.3366	0.0101	28.295	27.085	25.378	29.349	15.325	17.223	16.117	16.045	17.609	20.983	20.247	26.681	23.276	24.166	28.563	27.203	26.384	26.105	22.394	30.472
FBgn0039644	CG11897		protein_coding	-1.914	1.594e-11	-0.03625	0.8172	-0.02103	0.9123	0.1867	0.3245	22.475	28.207	19.953	18.319	110.276	165.755	32.047	42.413	52.336	43.489	54.952	47.581	40.788	37.503	57.811	42.271	40.138	73.492	69.977	68.375
FBgn0036809	CG12477		protein_coding	4.766	1.768e-11	0.1133	0.4089	0.1072	0.4617	0.149	0.4298	26.282	17.333	11.705	10.709	0.691	0.746	0.214	0.389	1.348	1.249	0.194	3.613	3.405	0.645	1.779	3.994	0.613	2.813	1.678	1.429
FBgn0039868	CG11563		protein_coding	-0.8929	1.791e-11	-0.1431	0.2293	-0.1878	0.1675	-0.2838	0.05713	34.324	28.723	25.519	27.727	60.382	62.017	48.93	49.867	68.93	60.538	47.641	52.408	44.961	41.987	42.549	57.758	38.396	41.642	45.953	45.121
FBgn0038833	CG15696		protein_coding	3.216	1.855e-11	0.1563	0.3035	0.3568	0.1403	0.4227	0.113	8.502	11.929	5.748	5.531	1.201	0.544	0.535	0.811	0	1.08	0.302	1.361	0.679	1.712	1.065	1.807	1.518	1.564	1.152	1.524
FBgn0031574	CG3964	TTLL4	protein_coding	-1.031	1.929e-11	-0.05349	0.7493	-0.1441	0.3149	-0.7438	5.229e-05	3.693	3.082	4.285	2.74	5.788	7.252	8.171	7.903	7.447	9.838	8.253	6.986	8.065	7.61	6.659	6.321	7.429	5.171	3.236	5.493
FBgn0000826	png		protein_coding	-2.346	2.205e-11	0.03043	0.8394	-0.04261	0.784	-0.411	0.07802	0.841	1.846	0.89	1.014	10.394	4.382	5.629	4.823	2.566	4.376	2.627	6.1	2.7	3.139	1.953	2.21	3.448	0.239	1.057	2.522
FBgn0050151	CG30151		protein_coding	-1.834	2.25e-11	-0.7202	0.01359	-1.58	5.605e-06	-2.396	3.583e-13	18.852	20.746	37.084	42.943	145.462	69.374	111.071	119.665	88.387	94.263	95.545	34.676	45.332	51.133	19.791	23.284	43.686	17.986	15.362	16.441
FBgn0261801	CG42747		protein_coding	-2.803	2.292e-11	-1.865	0.0006499	-1.374	0.005449	-2.601	7.585e-07	1.132	1.474	1.301	1.121	10.968	6.846	10.748	9.661	7.086	11.106	4.511	2.216	1.903	1.224	4.125	2.197	0.491	1.025	1.602	0.641
FBgn0052484	Sk2		protein_coding	0.4972	2.477e-11	0.06616	0.6415	0.2023	0.052	0.4056	1.881e-05	37.714	37.773	37.667	37.757	24.779	25.811	27.747	26.843	24.148	24.818	30.425	27.625	28.406	30.317	33.413	30.649	31.918	34.89	32.467	41.34
FBgn0029804	CG3097		protein_coding	1.948	2.49e-11	1.492	0.0001026	1.416	0.0001991	1.407	0.0001026	39.287	40.156	43.452	41.222	8.924	6.575	11.425	13.678	8.528	6.354	9.788	19.392	20.066	35.347	17.739	20.232	33.447	26.176	22.555	23.282
FBgn0004629	Cys		protein_coding	1.575	2.619e-11	-0.002906	0.9977	0.03716	0.8327	0.03784	0.882	101.328	58.64	86.402	95.341	29.939	18.449	31.598	30.567	35.677	43.704	37.133	36.695	38	40.3	42.334	51.872	35.556	55.548	48.366	23.09
FBgn0031693	Cyp4ac1		protein_coding	2.787	2.636e-11	0.6128	0.05795	0.08199	0.5492	1.608	0.002592	3.935	4.455	3.896	2.977	0.51	0.464	0.534	0.53	0.715	0.386	0.308	3.059	0.417	0.84	0.327	1.182	0.665	2.397	1.884	1.43
FBgn0032791	CG18094	NUDT19	protein_coding	-1.538	2.695e-11	-0.04365	0.7896	-0.09658	0.5296	-0.02273	0.9345	0.941	1.072	1.205	1.157	2.362	3.097	3.399	4.475	5.441	2.846	4.276	4.211	2.983	3.608	4.677	2.811	2.83	5.1	4.53	3.105
FBgn0025674	CycK	CCNK	protein_coding	-0.4342	2.962e-11	-0.000349	1	0.01484	0.9082	-0.06567	0.5912	23.314	23.763	25.408	25.582	32.035	29.779	36.798	35.829	29.518	27.694	27.506	28.393	27.092	29.065	29.994	27.438	28.848	29.082	25.919	25.812
FBgn0284246	l(2)k09848	WDR74	protein_coding	-0.6869	3.105e-11	-0.1307	0.2753	-0.1146	0.3994	-0.2164	0.1035	24.135	24.142	22.656	22.246	37.972	40.455	38.183	36.823	39.45	42.157	32.923	36.916	32.009	27.272	31.411	39.524	28.912	34.434	28.906	31.221
FBgn0033902	eIF3m	EIF3M	protein_coding	-0.5402	3.153e-11	-0.06005	0.6889	-0.02746	0.8431	-0.1017	0.4304	169.806	210.702	165.94	175.435	292.212	255.882	253.945	267.941	194.808	207.074	222.577	181.828	193.808	204.047	188.511	207.284	207.457	182.986	194.521	195.879
FBgn0031435	Elba2		protein_coding	-2.7	3.19e-11	0.03483	0.8151	0.1079	0.4421	0.221	0.2463	0.342	0.437	0.066	0.21	2.498	1.759	1.409	1.602	2.712	2.464	1.479	3.62	3.099	1.509	4.494	3.709	1.633	5.17	2.277	3.109
FBgn0032168	CG13126	METTL17	protein_coding	-0.7236	3.341e-11	-0.0762	0.6117	-0.1719	0.1924	-0.4258	0.001632	7.491	9.353	9.043	10.101	14.752	16.233	15.561	14.599	14.369	13.086	14.664	11.181	15.819	10.471	10.849	9.653	13.517	8.833	9.797	10.04
FBgn0038746	Surf6		protein_coding	-0.7705	3.369e-11	-0.1487	0.2036	-0.2682	0.03398	-0.29	0.03445	47.607	38.808	37.7	34.339	75.262	66.953	67.055	67.333	63.582	74.135	49.384	47.406	58.44	44.328	43.834	51.689	44.123	52.312	46.739	44.713
FBgn0035980	mRRF1	MRRF	protein_coding	-0.9396	3.388e-11	-0.1409	0.2372	-0.4294	0.006774	-0.1424	0.4263	9.078	5.853	5.839	7.187	14.721	13.351	12.896	13.218	12.43	16.205	11.584	9.013	12.853	8.809	6.716	7.735	10.03	11.651	10.861	11.583
FBgn0003278	RpI135	POLR1B	protein_coding	-0.7663	3.432e-11	-0.114	0.3708	-0.2061	0.1123	-0.1338	0.3954	16.58	17.658	16.878	17.14	28.342	34.694	28.221	27.829	28.235	31.25	21.784	27.386	21.875	19.166	22.539	20.995	20.786	23.602	23.264	24.383
FBgn0030863	CG8188	UBE2S	protein_coding	0.599	3.478e-11	0.1315	0.2522	0.03285	0.8266	0.2094	0.08121	59.077	50.031	53.491	54.438	35.009	37.488	33.917	33.822	30.813	34.099	34.411	40.919	39.526	36.333	35.815	32.955	35.054	43.339	39.89	36.255
FBgn0030057	Ppt1	PPT1	protein_coding	0.8168	3.48e-11	0.1171	0.356	0.08536	0.5774	-0.02834	0.9018	66.482	56.48	77.226	77.164	38.087	34.213	38.272	42.768	40.511	44.864	38.375	53.477	53.347	43.349	44.987	50.951	43.731	41.124	39.313	39.829
FBgn0031874	CG13775		protein_coding	1.053	3.657e-11	0.05258	0.7461	-0.1421	0.3277	-0.1281	0.5088	12.549	10.89	12.398	11.963	4.956	4.313	6.39	6.674	6.889	5.405	5.045	6.807	5.948	6.886	4.246	3.56	5.324	7.089	3.182	4.935
FBgn0030081	CG7246		protein_coding	-0.74	3.688e-11	-0.1844	0.09655	-0.2118	0.0985	-0.343	0.009942	15.545	15.684	15.182	13.429	24	28.613	25.982	23.832	29.553	26.245	21.967	20.939	23.327	16.356	17.485	22.831	20.535	17.459	19.588	19.489
FBgn0015520	nonA-l		protein_coding	0.7263	4.053e-11	0.1349	0.2562	0.09364	0.5203	0.2406	0.07638	33.085	28.918	34.111	32.06	17.806	18.126	19.756	19.92	23.506	26.281	19.141	29.74	28.68	25.039	26.376	24.8	26.338	27.736	27.298	30.324
FBgn0004107	Cdk2	CDK3	protein_coding	-0.5174	4.295e-11	-0.06894	0.628	-0.1305	0.2539	-0.3643	0.0002755	24.628	24.756	27.177	27.472	40.963	35.359	36.939	38.483	39.057	39.084	38.484	32.11	37.132	37.621	30.918	34.475	36.592	27.673	27.76	31.158
FBgn0266694	CR45184		ncRNA	-0.706	4.319e-11	-0.1472	0.2022	0.05919	0.7019	0.005345	0.987	103.625	132.716	102.912	100.537	172.035	233.39	159.786	169.703	200.951	202.546	213.15	162.541	151.917	192.116	244.232	221.052	201.977	223.585	217.518	179.401
FBgn0030407	CG2543	FPGS	protein_coding	-1.208	4.402e-11	-0.102	0.4106	-0.07354	0.6598	-0.1822	0.3145	2.366	2.976	2.591	2.543	6.333	7.757	5.241	5.79	7.012	6.931	6.942	5.82	4.631	5.674	5.808	5.159	6.888	6.018	5.113	5.552
FBgn0004584	Rrp1		protein_coding	-0.5685	4.402e-11	-0.07797	0.5731	-0.06774	0.6071	-0.2638	0.01552	56.34	61.624	68.272	62.832	86.822	84.698	102.819	102.877	96.259	88.399	92.654	77.915	83.298	89.985	79.823	89.203	86.975	70.122	73.155	79.142
FBgn0039114	Lsd-1		protein_coding	-1.742	4.402e-11	-0.002934	0.9967	0.01747	0.9342	0.07659	0.7322	3.041	3.531	4.475	4.1	14.62	9.49	14.387	14.458	9.843	11.778	14.042	10.007	8.853	16.255	11.657	10.36	15.639	12.495	10.142	18.134
FBgn0033373	CG8080	NADK2	protein_coding	-1.301	4.453e-11	-0.1075	0.3767	-0.2551	0.08823	-0.3297	0.06094	1.553	1.56	1.489	1.381	4.194	2.205	4.515	4.403	6.005	4.835	5.592	4.723	3.599	4.169	2.821	3.499	4.359	4.713	2.877	3.768
FBgn0267327	Acp33A		protein_coding	7.298	4.785e-11	0.2341	0.2615	0	1	5.57	8.523e-06	12.271	10.324	7.432	5.355	0	0	0.119	0	0	0	0	0.908	0	0.457	0	0	0	10.178	4.616	3.592
FBgn0038744	CG4733		protein_coding	-1.887	4.985e-11	-0.9968	0.004986	-0.4307	0.04564	-1.617	9.402e-06	1.627	2.149	2.002	2.194	11.207	9.59	4.838	5.295	6.014	7.206	8.453	2.867	3.411	2.885	4.257	4.502	2.561	3.197	2.428	1.217
FBgn0035471	Sc2	TECR,TECRL	protein_coding	0.923	5.065e-11	0.18	0.1204	0.3088	0.02439	0.4405	0.003458	270.765	196.041	187.386	170.62	108.817	106.197	108.779	98.051	126.092	133.666	100.979	174.144	170.841	138.118	181.654	191.455	141.837	178.505	184.035	179.668
FBgn0036058	CG6707	PIP4P2,PIP4P1	protein_coding	0.4441	5.457e-11	0.01651	0.9467	0.03209	0.7896	-0.01371	0.9373	102.731	81.398	92.956	97.599	68.109	67.455	66.346	69.209	67.538	67.232	72.954	72.122	69.03	71.149	71	72.007	72.964	73.869	68.472	64.633
FBgn0027608	CG2082	NDRG2,NDRG3,NDRG1	protein_coding	2.041	5.746e-11	1.596	7.691e-05	2.318	7.85e-10	3.132	5.721e-18	44.596	111.242	52.25	54.012	15.196	17.084	13.687	14.468	12.433	11.64	14.885	29.23	27.257	71.341	52.298	61.912	94.193	155.647	114.225	95.369
FBgn0043456	CG4747	GLYR1	protein_coding	-0.427	5.904e-11	-0.0266	0.884	-0.04481	0.6862	-0.1408	0.1384	120.391	134.133	144.052	143.622	170.571	173.445	197.963	197.413	192.089	204.345	188.524	192.287	193.597	181.296	192.148	184.371	180.1	176.193	184.085	164.147
FBgn0039154	Npc2f		protein_coding	-1.82	5.904e-11	-1.635	3.429e-06	-1.753	4.513e-07	-2.598	2.009e-14	14.35	10.494	13.013	16.577	60.321	42.527	50.573	47.089	60.714	65.489	72.119	14.967	24.369	20.41	13.498	19.186	22.096	11.216	7.347	12.094
FBgn0262562	CG43102		protein_coding	3.812	5.948e-11	0.02478	0.8583	0.08352	0.5444	0.1219	0.5125	1.418	1.082	0.333	0.438	0.062	0.043	0.046	0.054	0.264	0.151	0.169	0.317	0.313	0.172	0.431	0.485	0.139	0.437	0.483	0.08
FBgn0000346	comt	NSF	protein_coding	-0.9436	6.083e-11	-0.1269	0.302	-0.178	0.2003	-0.2779	0.07352	10.509	11.176	9.823	10.332	20.101	17.325	22.542	23.057	22.606	25.294	20.56	20.311	16.825	17.067	19.795	16.066	17.705	17.591	17.539	16.419
FBgn0035039	Adck	ADCK1	protein_coding	-0.675	6.083e-11	-0.1101	0.3865	-0.1375	0.2975	-0.145	0.3235	12.26	12.654	13.778	12.115	19.438	23.391	20.96	19.375	23.688	20.159	17.582	14.443	19.06	18.264	17.944	18.756	15.569	19.362	15.595	18.583
FBgn0030406	CG1463		protein_coding	-0.7812	6.152e-11	-0.08759	0.5348	0.02272	0.9059	0.02224	0.9244	10.583	10.598	12.473	11.843	21.876	20.994	18.659	18.854	19.084	19.38	18.401	16.564	16.494	15.983	19.906	22.44	16.822	24.352	20.957	14.718
FBgn0037235	CG1103		protein_coding	0.5186	6.19e-11	0.2418	0.008742	0.324	0.001023	0.4247	2.899e-05	59.515	65.563	59.942	58.182	41.499	47.1	38.831	39.208	36.103	34.885	41.832	46.376	43.959	54.207	53.017	44.029	53.644	48.572	50.545	57.866
FBgn0030276	Dlic	DYNC1LI2,DYNC1LI1	protein_coding	0.5656	6.301e-11	0.1356	0.2257	0.05309	0.7025	0.1293	0.3133	94.706	73.46	96.314	98.613	55.456	70.161	56.669	58.009	61.278	61.706	57.83	69.945	71.359	70.001	64.994	58.16	69.46	72.293	68.94	61.052
FBgn0004878	cas		protein_coding	3.478	6.374e-11	0.07378	0.5269	0.1244	0.3912	1.703	0.003096	4.161	5.761	8.193	8.727	0.571	0.716	0.424	0.444	2.154	1.81	0.684	4.95	3.084	0.765	3.913	3.906	1.383	11.067	9.836	0.892
FBgn0039437	TwdlL		protein_coding	6.51	6.374e-11	-0.0003272	1	0.02958	0.8344	0.1721	0.379	37.939	25.59	5.02	3.534	0.153	0.116	0.114	0.138	2.346	1.725	0.048	2.463	1.411	0.219	3.572	2.194	0.554	5.244	5.521	1.547
FBgn0039627	CG11837	DIMT1	protein_coding	-0.7825	6.374e-11	-0.2189	0.0493	-0.2766	0.03157	-0.319	0.02219	20.456	23.186	17.295	16.507	36.032	35.687	32.425	32.598	42.755	36.02	33.845	24.643	29.049	29.308	20.878	33.696	27.455	28.236	22.172	32.278
FBgn0037517	CG10086		protein_coding	4.689	6.629e-11	0.7208	0.06363	0.4877	0.1008	2.207	0.002169	1.599	3.094	2.259	2.56	0.07	0.133	0.043	0.059	1.15	0.345	0.028	2.154	2.73	1.793	1.167	3.169	1.189	4.427	4.911	1.376
FBgn0034573	CG3295	RMND5B,RMND5A	protein_coding	0.708	6.952e-11	0.1998	0.06563	0.3853	0.001461	0.3735	0.003562	80.319	74.635	78.534	79.147	45.791	48.938	44.89	47.071	34.961	33.254	50.047	48.923	47.443	57.202	50.298	58.447	61.702	59.904	57.449	48.116
FBgn0261363	PPO3		protein_coding	-2.313	7.518e-11	-0.2068	0.1733	-0.1291	0.3599	-0.5136	0.04182	0.688	0.54	0.778	0.845	4.639	1.844	4.267	4.377	4.543	3.096	3.25	1.733	2.855	1.046	2.523	1.878	2.42	1.075	1.467	2.275
FBgn0001139	gro	TLE3,TLE1,TLE4	protein_coding	-0.4904	7.764e-11	-0.416	1.544e-06	-0.3165	0.0003875	-0.558	2.79e-10	122.89	120.55	114.434	117.715	162.362	159.569	181.458	176.404	157.633	176.959	174.921	113.185	115.492	134.451	136.31	120.086	134.041	113.766	113.105	108.634
FBgn0035285	CG12025	TMEM134	protein_coding	0.5157	8.626e-11	0.2705	0.002347	0.3258	0.0006795	0.4247	1.553e-05	58.782	51.063	50.875	53.34	38.828	40.442	32.064	35.402	32.383	35.343	35.505	49.938	42.374	42.646	46.114	45.994	45.06	48.756	54.264	41.838
FBgn0035699	CG13300		protein_coding	-2.177	8.756e-11	-0.2029	0.1745	-0.1292	0.359	-0.2055	0.2809	0.416	0.956	0.357	0.481	3.527	3.784	1.73	1.651	1.799	2.223	1.289	1.113	1.075	0.614	1.348	1.287	0.772	1.67	0.942	0.908
FBgn0037749	CG9471	BLVRB	protein_coding	-0.8833	8.756e-11	0.01624	0.9598	-0.06819	0.683	0.04047	0.8581	17.189	14.11	19.902	15.302	32.642	24.627	35.126	34.108	40.235	43.098	34.967	44.102	43.68	34.628	31.486	38.492	35.771	39.817	32.968	49.251
FBgn0028582	lqf		protein_coding	0.736	8.892e-11	0.1288	0.2927	0.05093	0.7552	0.3279	0.01268	27.537	20.678	23.235	23.145	12.079	17.081	13.029	13.11	15.851	16.036	18.828	21.173	18.2	21.939	16.6	16.344	21.452	20.165	19.955	27.57
FBgn0037758	CG9467	KCTD3,SHKBP1	protein_coding	0.5159	8.904e-11	0.1347	0.2204	0.0607	0.6417	0.2914	0.004948	41.287	39.785	38.641	42.427	26.23	30.46	26.934	27.602	24.866	27.388	28.016	31.713	31.719	30.131	26.857	27.671	31.425	35.074	35.532	31.667
FBgn0011204	cue		protein_coding	-0.8772	9.528e-11	-0.237	0.0417	-0.1859	0.1717	-0.4714	0.001392	48.332	59.687	73.712	65.539	103.106	97.258	138.968	128.96	146.042	151.661	91.955	88.659	97.709	93.051	114	101.013	91.659	91.043	93.146	71.272
FBgn0029830	Grip		protein_coding	-2.017	9.562e-11	-0.9054	0.009833	-0.9475	0.006917	-1.068	0.002227	0.498	0.759	0.276	0.334	1.382	1.445	2.601	2.571	2.31	2.883	2.469	1.805	0.492	0.991	0.963	0.85	1.315	0.636	1.008	1.217
FBgn0083940	RhoU		protein_coding	1.145	9.615e-11	0.2187	0.08719	0.164	0.2517	0.1638	0.3778	2.379	2.673	1.941	1.472	0.819	1.201	0.78	0.875	1.95	1.683	1.698	2.033	3.12	2.72	2.329	2.767	2.087	2.65	1.932	2.157
FBgn0035707	CG8368		protein_coding	-0.3628	1.047e-10	-0.1049	0.2857	-0.1071	0.2475	-0.1304	0.1468	25.424	28.752	26.858	26.549	33.189	35.358	36.339	35.161	35.195	33.725	33.428	30.761	31.981	29.925	32.845	31.05	29.549	31.994	31.169	29.838
FBgn0267972	Der-1	DERL1	protein_coding	0.4897	1.077e-10	0.1516	0.1386	0.2036	0.05011	0.02867	0.8679	100.282	87.299	103.162	99.957	67.315	59.483	73.333	73.309	64.19	73.323	75.681	81.008	85.615	84.211	80.525	91.981	83.842	59.748	73.332	82.194
FBgn0033134	Tsp42El		protein_coding	-1.612	1.111e-10	0.03117	0.87	0.02368	0.9053	-0.0843	0.7029	3.928	2.975	2.659	1.951	7.515	7.186	10.172	11.436	19.624	14.895	11.749	13.379	17.754	20.415	15.537	14.833	18.5	17.796	12.93	10.293
FBgn0020445	E23		protein_coding	-1.143	1.186e-10	-0.1482	0.2114	0.009902	0.967	-0.1945	0.2708	3.059	4.09	3.849	4.243	9.815	9.931	7.292	7.898	11.448	10.252	11.598	6.659	8.447	9.01	12.678	11.306	10.084	10.701	10.667	5.313
FBgn0033138	Tsp42Eq		protein_coding	7.311	1.191e-10	0.03938	0.7455	0.1532	0.3469	4.248	7.031e-07	6.166	6.286	4.003	2.74	0.03	0	0	0.034	0	1.196	0.048	0.574	0.537	1.082	1.347	1.714	0.48	13.099	15.907	4.083
FBgn0264979	CG4267		protein_coding	2.065	1.318e-10	0.3573	0.07917	0.07445	0.6082	0.3175	0.1167	21.54	6.848	14.419	11.768	2.608	2.152	3.634	3.93	3.984	5.1	2.8	7.644	8.641	8.12	2.161	3.61	9.749	6.71	4.735	9.376
FBgn0014073	Tie		protein_coding	-2.55	1.336e-10	-0.09251	0.4216	-0.06826	0.6303	-0.2364	0.2273	0.098	0.172	0.047	0.168	0.943	0.808	0.58	0.745	0.66	0.632	0.284	0.501	0.155	0.267	0.45	0.517	0.183	0.254	0.4	0.222
FBgn0028412	Mst33A		protein_coding	7.637	1.36e-10	0.0971	0.508	0.06747	0.6567	0.03398	0.8668	3.553	2.915	3.249	3.228	0.024	0	0	0	0	0	0.038	0	0.086	0.232	0	0	0.165	0	0.097	0
FBgn0040237	bor	ATAD3A	protein_coding	-0.6479	1.399e-10	-0.1613	0.1454	-0.3805	0.0007712	-0.2094	0.1049	46.297	51.288	47.35	42.085	75.778	77.689	73.589	73.126	85.256	76.06	59.792	59.588	64.734	55.823	55.497	51.192	49.48	54.495	50.831	76.727
FBgn0028663	VhaM9.7-b		protein_coding	0.5112	1.409e-10	-0.01496	0.9602	0.07239	0.5693	0.2151	0.05044	86.964	73.238	82.186	80.182	60.74	55.899	50.806	54.296	56.703	61.186	62.455	57.533	55.934	63.202	59.498	71.352	64.809	73.772	68.077	74.025
FBgn0029137	Patsas		protein_coding	-2.326	1.774e-10	-0.05371	0.6528	-0.2376	0.1647	-0.3003	0.1436	0.345	0.305	0.141	0.153	1.512	1.128	0.952	1.343	0.821	1.231	0.833	0.752	1.032	0.347	0.368	0.449	0.599	0	0.53	0.718
FBgn0038532	CG14322		protein_coding	-0.6971	1.774e-10	-0.02195	0.9358	-0.04516	0.7826	-0.2212	0.1092	4.115	5.492	4.79	5.56	7.734	9.566	7.576	8.403	8.191	9.839	8.279	9.057	8.993	7.42	8.856	7.925	7.989	7.018	8.134	6.389
FBgn0034419	CG15111		protein_coding	-0.4103	1.865e-10	0.004404	0.9922	0.04847	0.6807	-0.02129	0.895	19.844	18.026	18.147	17.148	24.644	25.806	24.179	23.51	26.344	25.068	25.24	23.706	27.417	25.523	28.754	27.503	25.301	27.641	26.052	23.193
FBgn0267495	CR45185		ncRNA	2.705	1.9e-10	2.748	4.308e-06	3.393	2.752e-09	2.503	1.425e-05	0.944	2.084	1.327	1.372	0.131	0.428	0.125	0.113	0.22	0.17	0.206	0.808	1.318	2.345	1.842	2.766	2.456	0.902	1.53	1.523
FBgn0261258	rgn		protein_coding	-1.281	1.962e-10	-0.1074	0.3736	-0.1659	0.2449	-0.9281	8.423e-05	82.421	127.485	144.164	164.858	301.859	300.724	348.261	358.515	297.361	352.362	294.353	232.864	241.328	230.213	246.288	212.951	230.484	163.904	166.706	122.698
FBgn0011705	rost		protein_coding	-1.926	1.966e-10	-1.357	0.0004944	-2.147	9.473e-09	-1.568	2.637e-05	2.65	2.521	1.453	1.24	14.329	7.322	5.254	4.317	16.178	12.053	14.166	4.529	6.438	4.185	1.845	4.566	2.431	7.009	3.444	3.289
FBgn0038139	PK2-R2		protein_coding	5.455	2.038e-10	0.1944	0.2748	0.1943	0.2856	0.06387	0.7367	1.074	1.454	1.42	1.392	0	0.053	0.014	0.025	0.162	0.22	0	0.579	0.197	0.583	0.186	0.588	0.403	0.182	0.134	0.229
FBgn0038681	Cyp12a4		protein_coding	-3.209	2.043e-10	-0.01075	0.9632	0.003161	0.993	0.02084	0.9367	0.201	0.177	0.029	0.037	1.099	1.001	1.168	1.063	0.842	0.705	0.756	0.819	0.273	0.962	0.641	0.87	0.783	0.627	1.002	0.756
FBgn0052409	CG32409	RRS1	protein_coding	-0.7538	2.053e-10	-0.1726	0.1283	-0.2444	0.05589	-0.3601	0.008032	41.915	41.346	41.015	35.242	71.293	67.617	68.493	69.001	76.715	76.503	63.78	55.452	65.683	48.481	58.625	59.186	48	54.06	52.162	50.7
FBgn0263510	nclb		protein_coding	-0.72	2.074e-10	-0.1758	0.1161	-0.3732	0.002512	-0.3279	0.0128	37.597	41.372	43.759	38.423	63.098	63.071	75.066	71.609	80.186	75.7	63.548	54.935	63.624	53.88	47.292	54.265	51.02	51.039	55.046	56.771
FBgn0036282	Smyd4-2		protein_coding	-3.907	2.08e-10	-0.05214	0.6528	-0.1418	0.358	-0.1632	0.3879	0.118	0.208	0.183	0.058	4.457	0.628	2.28	2.618	0.935	0.34	0.712	0.499	0.534	0.108	0.503	0.227	0.171	0.246	0.302	0.395
FBgn0261283	SREBP		protein_coding	-0.5895	2.097e-10	-0.05491	0.7315	-0.0735	0.5882	-0.2225	0.05977	125.512	165.764	164.037	165.036	216.795	209.416	260.784	267.916	231.274	246.156	250.605	215.512	217.601	242.343	228.58	194.861	243.867	215.657	198.326	189.378
FBgn0035159	CG13896		protein_coding	0.9994	2.493e-10	0.0727	0.6207	0.07697	0.6393	0.09197	0.6571	21.637	18.677	18.983	19.364	9.296	10.399	9.3	8.924	13.168	19.446	12.103	17.526	21.542	14.095	14.773	18.502	17.623	15.491	19.661	14.69
FBgn0037565	CG9626		protein_coding	-2.142	2.536e-10	-0.6233	0.03354	-0.4802	0.05005	-2.089	5.177e-07	2.43	4.699	4.928	5.647	26.309	24.252	15.232	17.41	9.151	11.971	15.893	4.02	4.839	7.004	5.241	3.756	8.168	1.72	3.052	3.037
FBgn0033876	Syngr		protein_coding	1.025	2.631e-10	0.07496	0.6028	0.1256	0.3977	0.08387	0.6883	6.127	6.865	5.375	6.232	3.428	3.284	2.568	2.363	5.801	8.348	6.954	8.548	9.22	7.484	7.762	10.263	8.04	9.037	6.708	7.887
FBgn0019938	RpI1	POLR1A	protein_coding	-0.7809	2.696e-10	-0.1589	0.1713	-0.2469	0.0559	-0.3899	0.004645	21.026	22.88	26.023	24.072	35.506	40.267	44.163	46.34	55.252	49.625	33.471	38.685	38.998	31.31	39.208	33.349	32.174	32.815	32.244	32.23
FBgn0038581	CG14314		protein_coding	-1.573	2.729e-10	-0.03998	0.7998	-0.03257	0.8591	-0.1364	0.4933	3.605	5.589	5.307	4.183	15.133	13.178	14.989	14.918	10.233	12.369	9.176	10.289	11.524	5.226	10.274	10.652	8.002	5.47	8.713	10.381
FBgn0036663	CG9674		protein_coding	1.391	2.898e-10	1.005	0.0005368	1.073	0.0001615	0.6546	0.003206	37.877	48.911	42.87	41.905	12.981	28.25	10.987	10.707	17.395	16.669	16.838	31.405	32.61	44.784	38.381	27.045	48.148	33.535	30.977	31.623
FBgn0261859	CG42788		protein_coding	1.085	3.113e-10	0.2045	0.0953	0.1934	0.1717	0.4362	0.01047	23.979	18.277	25.582	24.555	9.002	8.466	12.484	12.044	16.689	16.231	11.781	23.953	21.989	18.922	22.618	20.266	17.763	29.74	25.232	15.199
FBgn0034438	CG9416	ERMP1	protein_coding	-2.602	3.133e-10	-1.133	0.01238	-2.18	2.559e-05	-3.561	3.688e-13	1.041	1.604	7.38	8.308	24.433	21.499	40.712	34.76	56.761	64.888	35.022	19.42	22.344	8.261	11.543	12.079	6.809	3.84	3.978	4.041
FBgn0024956	Mat1	MNAT1	protein_coding	-0.4501	3.249e-10	-0.1408	0.1733	-0.1185	0.2867	-0.2595	0.008664	44.362	51.261	44.156	43.321	66.418	67.143	60.771	60.164	57.825	58.077	60.874	46.471	53.975	51.955	49.629	53.976	53.705	48.059	50.349	46.015
FBgn0051038	CG31038		protein_coding	2.409	3.297e-10	0.2934	0.126	1.255	0.006	1.377	0.002071	4.373	2.76	1.454	1.512	0.25	0.882	0.284	0.335	0.931	0.455	0.549	1.429	1.734	1.128	2.372	2.434	1.178	2.25	2.921	1.12
FBgn0031746	CG9029		protein_coding	3.871	3.337e-10	2.296	0.004052	2.763	0.0007407	2.96	0.0001299	5.464	4.29	5.299	5.372	0.117	0.055	0.288	0.787	0.637	0.164	0.641	2.478	5.773	3.047	6.141	4.388	3.555	10.913	2.331	3.701
FBgn0011824	CG4038	GAR1	protein_coding	-0.6987	3.35e-10	-0.4641	0.0002806	-0.3061	0.01092	-0.373	0.003601	83.098	92.954	64.925	62.52	127.697	126.203	134.184	117.522	196.363	172.405	137.574	103.604	117.124	115.711	121.642	130.4	119.472	129.341	115.199	121.434
FBgn0034614	CG9752	C9orf64	protein_coding	-0.719	3.427e-10	-0.1135	0.3721	-0.2907	0.01895	-0.5248	7.701e-05	34.178	28.375	40.042	33.75	56.744	47.944	65.034	60.98	80.128	71.883	66.331	64.588	68.013	51.669	54.029	53.211	53.811	45.895	44.286	49.999
FBgn0011217	eff		protein_coding	0.5888	3.499e-10	0.2141	0.03226	0.1164	0.359	0.2745	0.01702	273.751	222.896	251.246	255.121	172.724	177.59	151.203	150.061	192.946	196.251	173.938	253.017	243.134	218.959	211.865	213.701	213.804	208.806	238.428	260.832
FBgn0025628	CG4199		protein_coding	0.8517	3.502e-10	0.01787	0.9559	0.09584	0.5336	0.2499	0.1016	61.243	56.85	60.391	66.515	31.545	35.122	31.653	33.259	26.815	25.484	25.543	23.075	26.291	31.149	28.351	25.818	35.447	29.648	28.263	41.603
FBgn0014931	CG2678		protein_coding	-1.775	3.576e-10	0.0501	0.7131	-0.02504	0.8962	-0.2236	0.2355	0.85	0.976	0.792	0.564	3.593	2.175	2.686	2.995	4.34	3.719	2.102	6.014	3.985	2.677	3.893	3.625	1.917	1.728	2.546	2.317
FBgn0035497	CG14995		protein_coding	0.7501	3.63e-10	0.09975	0.4543	-0.009058	0.9677	-0.2091	0.1581	29.501	23.948	26.82	28.645	15.598	16.043	15.158	16.124	17.363	16.474	17.137	22.781	19.898	17.461	16.617	15.682	17.899	13.698	14.196	13.737
FBgn0026749	Yippee	YPEL5	protein_coding	0.727	3.678e-10	0.1659	0.1476	0.2903	0.02371	0.4006	0.003643	42.605	39.441	37.592	38.553	25.703	24.636	20.777	21.717	19.341	21.765	25.377	27.591	25.496	32.213	30.572	31.315	29.875	39.939	33.074	25.268
FBgn0034070	SP2353		protein_coding	3.455	3.733e-10	1.47	0.01235	1.827	0.004492	0.6242	0.0542	28.285	31.952	42.415	45.634	1.851	7.518	1.251	1.364	6.905	7.666	4.904	35.082	37.164	18.047	43.421	33.995	22.549	27.675	28.722	4.086
FBgn0263490	mld		protein_coding	-0.9552	3.733e-10	-0.2388	0.05018	-0.7549	7.292e-05	-1.048	2.673e-08	13.911	16.127	22.774	26.812	35.973	41.082	40.195	42.586	42.357	48.886	30.57	30.242	31.818	22.63	25.419	20.091	22.421	19.615	19.557	17.942
FBgn0026401	Nipped-B		protein_coding	-1.088	4.071e-10	-0.03553	0.8622	-0.09101	0.564	-0.001866	1	25.184	28.184	26.557	30.301	59.347	78.373	51.479	53.956	62.587	65.903	51.119	65.724	50.934	47.047	56.119	53.328	42.317	64.336	65.671	49.266
FBgn0035988	CG3982		protein_coding	1.872	4.115e-10	1.142	0.004511	0.1949	0.2058	0.5085	0.03729	3.687	3.929	4.052	4.401	1.259	1.147	0.973	0.784	0.9	1.517	1.588	5.095	3.737	2.297	1.495	2.622	2.843	1.647	3.505	2.98
FBgn0260231	CG42505		protein_coding	4.954	4.223e-10	4.182	0.0009666	4.537	0.0002598	2.571	0.005071	0.741	0.96	1.467	1.13	0.038	0.018	0.035	0.021	0	0.027	0.015	0.852	0.571	0.564	1.579	0.571	0.407	0.309	0.721	0.071
FBgn0260230	CG42504		protein_coding	4.954	4.223e-10	4.182	0.0009666	4.537	0.0002598	2.571	0.005071	0.741	0.96	1.467	1.13	0.038	0.018	0.035	0.021	0	0.027	0.015	0.852	0.571	0.564	1.579	0.571	0.407	0.309	0.721	0.071
FBgn0266581	pit	DDX18	protein_coding	-0.7446	4.39e-10	-0.1325	0.2737	-0.3446	0.006192	-0.4525	0.0007525	34.282	33.701	36.751	35.466	54.141	60.499	64.955	62.059	84.021	76.454	57.286	66.098	62.608	49.573	52.657	53.755	47.267	45.265	52.7	48.805
FBgn0001341	l(1)1Bi		protein_coding	-1.127	4.46e-10	-0.1232	0.3044	-0.1279	0.3873	-0.3073	0.07088	12.98	12.713	14.811	13.085	27.288	31.779	31.344	31.132	36.309	35.063	21.572	25.6	25.744	18.245	30.205	24.681	18.806	22.134	25.836	17.292
FBgn0053508	ppk13		protein_coding	3.054	4.952e-10	2.895	0.003107	4.671	9.188e-07	5.883	7.805e-11	7.086	5.631	2.585	2.654	0.54	1.02	0.107	0.243	0	0.061	0.102	0.306	0.917	1.283	0.958	3.252	3.269	7.736	4.837	5.97
FBgn0037518	CG2641		protein_coding	1.178	5.014e-10	0.2647	0.05856	0.2525	0.09175	0.4475	0.0146	14.097	13.914	17.457	15.508	5.047	5.688	8.44	6.824	8.044	9.806	10.168	13.91	16.164	14.255	11.408	13.856	16.484	16.923	19.14	10.515
FBgn0011703	RnrL	RRM1	protein_coding	-0.649	5.148e-10	-0.03403	0.8768	-0.1358	0.2974	-0.1331	0.3598	103.118	93.985	111.998	95.111	149.868	153.167	172.399	174.758	183.968	175.158	140.517	161.209	167.608	145.075	149.381	138.209	140.554	133.147	137.324	171.143
FBgn0262876	CG43231		protein_coding	6.665	5.158e-10	0.4607	0.1401	0.9362	0.05556	1.76	0.01403	3.319	4.929	3.485	2.713	0.028	0.052	0	0	0	0	0.044	0.393	0	0.593	0	0.209	1.001	0.451	1.108	0.311
FBgn0038869	Smyd5	SMYD5	protein_coding	-0.724	5.253e-10	-0.1859	0.09732	-0.1498	0.2728	-0.2023	0.1715	20.219	23.149	18.307	16.853	35.484	37.938	32.283	27.656	30.211	30.317	29.954	22.551	24.397	22.579	22.599	29.225	23.204	25.127	24.497	24.905
FBgn0033438	Mmp2		protein_coding	2.205	5.927e-10	0.1153	0.3375	0.0459	0.7675	0.04206	0.8602	6.153	5.336	6.633	6.037	0.891	1.202	1.206	1.599	2.868	3.632	1.47	5.122	6.098	2.531	4.153	3.134	2.566	3.837	3.666	1.483
FBgn0036109	Cpr67Fa2		protein_coding	5.39	5.955e-10	0.03682	0.7599	0.02632	0.8567	0.1828	0.3484	6.781	5.414	7.717	4.334	0.058	0.055	0.143	0.195	2.74	2.116	0.273	3.553	2.662	2.476	0.963	4.792	0.915	4.24	6.944	0.865
FBgn0266948	CR45399		ncRNA	4.785	5.964e-10	4.797	0.00015	4.998	4.324e-05	6.093	2.086e-07	2.45	1.563	1.129	2.033	0.078	0	0	0.132	0	0.11	0	1.852	3.051	1.584	3.914	0.738	3.277	8.299	5.175	4.32
FBgn0030061	CG1785	NOP53	protein_coding	-0.5968	6.031e-10	-0.2111	0.03959	-0.1892	0.1193	-0.1913	0.136	43.588	50.544	43.082	42.765	73.889	65.548	69.691	69.817	74.737	63.183	59.657	49.731	52.713	51.902	49.54	58.434	54.307	59.169	59.665	48.855
FBgn0033507	CG12909		protein_coding	-1.044	6.4e-10	-0.1229	0.3084	-0.3402	0.02723	-0.2861	0.08666	31.795	27.188	26.096	23.627	61.804	63.293	55.488	51.759	63.991	56.198	36.906	43.74	43.195	32.561	30.954	41.182	29.945	39.244	40.464	33.94
FBgn0039993	CG17691	BCKDHB	protein_coding	-0.7575	6.843e-10	0.01209	0.9728	0.06291	0.7019	0.3172	0.02271	33.654	30.504	27.333	25.266	55.941	53.039	44.899	49	39.724	40.508	52.712	56.723	35.183	45.042	55.152	48.204	43.553	59.005	64.263	56.03
FBgn0029133	REG	PSME3,PSME2,PSME1	protein_coding	-0.5552	7.044e-10	-0.1431	0.1973	-0.1638	0.1642	-0.06532	0.6788	149.537	152.708	142.905	135.582	223.824	216.195	218.85	213.837	254.703	238.113	213.645	194.017	196.076	206.927	197.873	201.485	200.631	178.043	194.022	291.792
FBgn0035385	FMRFaR		protein_coding	6.98	7.267e-10	4.637	0.0004466	5.628	7.671e-06	1.054	0.03606	0.424	0.392	0.153	0.432	0	0	0	0	0	0.022	0	0.183	0.247	0.903	1.548	0.759	0.683	0.063	0.124	0.116
FBgn0000547	ed		protein_coding	1.162	7.278e-10	-0.01801	0.9489	0.1079	0.4775	0.2353	0.1797	65.306	73.114	56.404	66.466	32.777	38.933	18.86	21.709	26.023	26.596	32.008	28.171	22.469	29.632	36.689	35.322	32.717	48.805	41.869	22.992
FBgn0036813	Atg3	ATG3	protein_coding	0.4917	7.602e-10	0.08843	0.5031	0.03105	0.8319	0.3312	0.00205	43.095	38.604	39.525	40.467	26.334	30.593	28.198	27.398	28.479	29.602	30.322	33.898	28.8	35.959	28.662	29.13	33.572	37.498	32.025	44.763
FBgn0034243	Ns2	GNL2	protein_coding	-0.556	8.373e-10	-0.1047	0.4026	-0.02605	0.8688	-0.04084	0.8202	64.096	72.78	61.331	63.682	103.99	116.836	85.392	87.647	85.702	87.809	92.419	77.322	69.881	86.026	87.293	84.38	85.569	88.691	92.592	76.192
FBgn0029837	Tsp5D		protein_coding	-2.136	8.611e-10	-0.5893	0.03558	-1.54	0.0003503	-4.136	3.723e-19	0.929	0.809	1.175	0.864	5.819	2.448	5.048	4.452	13.05	11.605	9.817	7.106	5.762	2.47	4.731	3.561	2.488	0.505	0.744	0.521
FBgn0032346	Csl4	EXOSC1	protein_coding	-0.552	8.867e-10	-0.1634	0.1364	0.02258	0.8945	-0.3658	0.002283	26.811	24.005	25.407	22.976	38.417	39.312	35.293	35.315	32.179	34.635	33.486	28.752	28.303	25.545	37.23	35.874	31.43	17.84	26.851	26.181
FBgn0040491	Buffy		protein_coding	-3.625	9.024e-10	-1.969	0.00139	-2.281	0.0002761	-4.014	1.484e-07	0.082	0.145	0.239	0.242	5.389	1.369	1.676	1.844	5.966	5.316	4.848	1.19	1.337	0.824	0.349	2.134	0.285	0.256	0.378	0.176
FBgn0032191	CG5734	SNX17	protein_coding	0.4896	9.134e-10	0.2488	0.0068	0.5037	3.665e-07	0.471	3.058e-06	49.04	41.981	43.931	45.357	30.767	29.594	32.256	33.197	25.438	22.648	30.32	37.541	29.587	34.678	37.005	38.233	41.803	38.993	35.645	39.41
FBgn0035203	CG9149	ACAT2	protein_coding	-0.8914	9.134e-10	-0.3683	0.00897	-0.7907	2.067e-05	-0.7985	4.465e-06	65.796	55.79	67.625	65.487	133.205	78.907	137.091	139.614	123.225	95.356	94.348	63.106	70.578	71.175	53.05	51.144	67.803	47.356	53.983	65.524
FBgn0052580	Muc14A		protein_coding	4.416	9.316e-10	0.1046	0.4483	0.07271	0.6082	0.107	0.5629	0.344	0.242	0.058	0.086	0.01	0.013	0.002	0.003	0	0.008	0.004	0.025	0.005	0.011	0.026	0.003	0.003	0.011	0.013	0.004
FBgn0033454	CG1671	TBL3	protein_coding	-0.5583	9.33e-10	-0.07238	0.6259	-0.01198	0.9478	-0.1575	0.2222	27.47	31.78	31.147	29.313	43.419	50.466	43.649	43.031	39.554	46.549	44.999	40.706	38.374	40.164	42.906	42.974	43.297	35.766	42.556	36.089
FBgn0026192	par-6	PARD6A,PARD6B,PARD6G	protein_coding	0.4223	9.478e-10	0.2808	0.0003688	0.1661	0.09849	0.1854	0.05734	67.902	58.464	59.827	62.907	44.707	47.405	44.968	45.797	49.724	46.379	46.116	61.174	63.178	58.769	54.601	53.782	55.784	54.783	53.398	56.214
FBgn0044020	Roc2	RNF7	protein_coding	0.685	9.581e-10	-0.005262	0.9922	0.05399	0.74	0.02543	0.9088	92.445	68.205	66.348	69.408	41.514	47.324	49.105	40.929	62.057	48.775	71.943	64.994	53.716	63.254	65.306	63.483	68.987	62.86	62.456	62.841
FBgn0051015	PH4alphaPV		protein_coding	1.776	9.958e-10	0.2984	0.08983	1.185	0.001425	1.673	3.448e-06	43.424	34.939	30.405	27.703	11.698	8.64	7.909	9.649	8.738	7.267	9.537	13.471	13.769	21.012	26.515	16.544	22.7	28.955	34.892	23.844
FBgn0030996	CG14194		protein_coding	0.3578	1.051e-09	0.07295	0.5286	0.06135	0.5459	0.1959	0.02041	76.893	71.779	74.578	80.873	58.272	61.062	56.954	58.296	51.686	54.28	58.522	63.367	59.268	55.959	60.38	52.59	62.666	70.253	62.086	61.477
FBgn0267607	CR45945		ncRNA	6.568	1.094e-09	3.647	0.001885	3.676	0.001282	4.498	5.805e-05	8.974	10.055	11.846	10.975	0.168	0	0	0.095	0.918	0	0	5.161	8.623	5.593	8.857	5.062	6.266	19.16	12.439	2.041
FBgn0035162	Sf3b3	SF3B3	protein_coding	-0.7027	1.117e-09	-0.1278	0.2983	0.05472	0.7354	0.009824	0.9708	90.218	123.086	94.942	91.556	149.014	214.974	148.571	156.893	186.704	187.973	196.013	148.301	138.226	186.347	234.941	194.598	186.756	206.669	197.631	172.173
FBgn0037489	CG1234	NOC3L	protein_coding	-0.6264	1.17e-09	-0.1418	0.2242	-0.2191	0.07339	-0.2833	0.02521	18.836	19.828	20.459	22.652	31.222	38.645	28.676	31.022	36.717	32.504	27.611	24.859	27.794	27.101	23.97	27.035	25.673	24.632	23.237	27.044
FBgn0036111	Aps	NUDT4,NUDT4B	protein_coding	0.4583	1.174e-09	0.2524	0.002725	0.3329	0.0001712	0.5825	4.151e-11	229.355	195.749	190.558	206.123	156.495	161.32	132.635	136.837	130.862	137.347	141.881	182.35	167.959	171.259	175.272	186.956	180.037	233.462	222.594	179.146
FBgn0040283	SMC1		protein_coding	-0.4936	1.21e-09	0.008046	0.9812	-0.03676	0.7882	-0.1012	0.4369	37.842	41.838	45.331	46.431	57.61	61.4	63.059	64.386	56.782	53.695	53.194	58.799	58.869	47.984	53.095	53.192	50.181	44.23	55.99	49.567
FBgn0052232	CG32232		protein_coding	6.646	1.252e-09	3.038	0.006629	1.255	0.03697	3.088	0.002927	1.192	0.839	0.914	1.094	0.022	0	0	0	0	0	0	0.264	0.119	0.186	0.186	0.042	0.101	0.364	0.179	0.104
FBgn0267298	CR45734		ncRNA	7.039	1.407e-09	4.37	0.00108	3.817	0.002038	3.034	0.003309	5.008	4.24	6.376	7.848	0	0	0	0	0	0	0	2.271	6.379	2.571	3.333	2.262	3.53	2.936	4.327	0.225
FBgn0267795	Frl		protein_coding	0.7124	1.419e-09	0.148	0.2062	0.1513	0.2622	0.1474	0.339	97.297	86.592	104.931	108.517	56.316	48.598	63.512	67.158	50.938	52.153	53.323	64.029	58.522	71.545	58.413	54.159	75.165	67.832	65.357	47.349
FBgn0053203	CG33203		protein_coding	2.545	1.419e-09	0.1644	0.2591	0.8804	0.0281	2.037	0.0002079	0.735	1.005	1.085	0.813	0.081	0.238	0.125	0.125	0.257	0.227	0.174	0.048	0.606	0.695	0.839	0.417	0.774	1.724	0.887	0.753
FBgn0028563	sut1		protein_coding	-1.562	1.436e-09	0.0004271	1	-0.02797	0.8838	-0.1885	0.3179	1.483	1.123	1.931	1.822	3.824	2.588	6.693	6.576	8.245	5.605	3.981	5.378	6.187	6.089	5.864	4.388	5.971	3.311	3.307	5.925
FBgn0051935	CG31935		protein_coding	0.5261	1.454e-09	0.1511	0.1745	0.251	0.02595	0.3101	0.007293	18.543	16.89	19.946	20.366	11.905	14.57	11.854	13.082	10.748	10.707	13.786	12.676	14.525	15.298	14.765	15.454	15.023	15.582	16.764	14.159
FBgn0015929	dpa	MCM4	protein_coding	-0.5833	1.454e-09	-0.01605	0.9583	-0.09256	0.4905	-0.2257	0.06549	64.073	68.955	81.736	75.58	102.317	104.603	120.716	118.425	102.8	108.05	118.282	100.125	111.907	109.44	99.667	88.365	107.434	86.159	85.51	98.97
FBgn0266568	yar		ncRNA	3.493	1.556e-09	0.01819	0.9042	0.03351	0.8103	-0.004639	0.9898	5.154	4.362	3.201	1.82	0.2	0.519	0.123	0.281	0.363	0.468	0.522	0.786	0.588	0.435	0.738	0.501	0.639	0.542	0.732	0.155
FBgn0032755	CG17344		protein_coding	5.289	1.556e-09	0.6813	0.09076	0.8935	0.05812	0.3653	0.1652	7.316	9.429	2.962	4.378	0.081	0.192	0.05	0.137	0.148	0.115	0.064	0.769	0.288	2.129	0	1.839	1.472	0.331	0.814	0.608
FBgn0263982	CG43731		protein_coding	5.289	1.556e-09	0.6813	0.09076	0.8935	0.05812	0.3653	0.1652	7.316	9.429	2.962	4.378	0.081	0.192	0.05	0.137	0.148	0.115	0.064	0.769	0.288	2.129	0	1.839	1.472	0.331	0.814	0.608
FBgn0011335	vers		protein_coding	-0.5034	1.556e-09	-0.02711	0.904	-0.02016	0.8995	-0.1969	0.09563	24.086	25.984	24.692	26.806	39.931	37.126	34.682	35.343	34.711	34.161	39.199	32.868	34.786	36.569	35.354	34.245	36.027	24.631	33.624	31.805
FBgn0033654	Sobp		protein_coding	1.86	1.586e-09	0.06123	0.6078	0.151	0.2923	0.3655	0.08262	3.182	3.005	3.065	3.135	0.854	1.194	0.587	0.581	1.458	1.244	1.323	2.388	1.64	1.652	2.921	2.141	1.499	3.516	3.286	0.905
FBgn0032123	Oatp30B		protein_coding	0.9408	1.724e-09	0.1119	0.3716	0.09504	0.5444	0.3684	0.02087	26.713	30.558	22.399	24.647	11.962	20.805	9.482	10.096	16.516	16.215	13.148	19.315	18.467	20.05	18.097	18.656	17.059	23.037	22.753	21.02
FBgn0025592	Gk1	GK3P,GK2,GK	protein_coding	-0.6683	1.777e-09	-0.1378	0.2462	-0.005551	0.9845	0.02663	0.9027	14.571	16.387	19.717	18.252	25.578	26.231	31.178	30.03	28.851	26.168	32.9	20.618	23.731	27.519	26.451	26.961	33.503	29.638	29.526	31.101
FBgn0031764	CG9107	RRP7A	protein_coding	-0.5045	1.854e-09	-0.2081	0.03539	-0.1525	0.2015	-0.1494	0.2419	28.03	30.662	23.45	24.147	41.624	36.617	36.634	39.01	30.897	35.552	33.608	27.485	24.733	27.558	28.96	26.154	30.574	30.888	26.769	30.654
FBgn0039883	RhoGAP100F		protein_coding	-1.846	1.87e-09	-1.34	0.0007999	-0.4198	0.05336	-2.107	9.44e-09	5.769	10.954	6.525	7.55	27.377	50.58	19.275	19.699	22.044	29.844	61.277	11.041	11.474	17.871	23.589	14.837	18.817	9.201	9.2	5.96
FBgn0029525	CG18273		protein_coding	-0.5488	1.911e-09	-0.07006	0.6395	-0.09672	0.4592	-0.08675	0.5686	15.001	16.064	15.656	15.182	21.395	25.724	22.624	23.004	25.644	20.482	18.106	18.567	20.513	19.042	18.751	20.323	18.201	20.783	18.764	19.817
FBgn0265785	CG44574		protein_coding	5.026	1.912e-09	3.76	0.00122	3.869	0.0006375	0.6001	0.0841	2.418	5.187	3.618	6.24	0.133	0.125	0.082	0.075	0	0	0.312	4.699	5.397	1.576	4.781	5.991	1.948	1.62	1.326	0.495
FBgn0030177	CG2972	NOB1	protein_coding	-0.458	2.009e-09	-0.07603	0.5732	-0.02045	0.8911	-0.05377	0.7255	31.871	30.911	30.462	28.829	44.082	44.732	40.458	41.348	38.616	42.031	34.866	35.626	33.229	36.233	42.619	36.961	33.675	42.869	36.145	33.159
FBgn0038603	PKD		protein_coding	2.116	2.088e-09	0.06443	0.5759	0.05417	0.7199	0.9321	0.00758	7.437	6.692	13.145	9.63	1.508	0.866	3.084	2.515	1.931	2.983	2.998	3.578	3.457	4.717	2.857	2.31	4.929	7.771	8.06	4.754
FBgn0030955	CG6891	COTL1	protein_coding	1.157	2.094e-09	0.1741	0.1512	0.2928	0.05698	0.2592	0.1384	326.158	224.161	301.405	302.799	109.731	76.147	154	156.804	100.444	91.616	110.54	137.859	144.869	159.688	151.781	148.706	164.662	144.747	152.671	120.927
FBgn0026064	KP78a		protein_coding	1.102	2.101e-09	0.312	0.03524	0.5336	0.005456	1.031	4.919e-06	85.212	105.356	86.759	100.718	38.127	57.613	33.831	39.496	26.787	27.399	34.373	45.266	41.65	53.499	52.457	39.872	59.57	75.62	63.501	52.461
FBgn0026063	KP78b		protein_coding	1.102	2.101e-09	0.312	0.03524	0.5336	0.005456	1.031	4.919e-06	85.212	105.356	86.759	100.718	38.127	57.613	33.831	39.496	26.787	27.399	34.373	45.266	41.65	53.499	52.457	39.872	59.57	75.62	63.501	52.461
FBgn0030587	CG9522		protein_coding	2.277	2.175e-09	0.09179	0.4487	0.2191	0.2203	0.9271	0.02346	3.459	2.701	2.962	2.493	0.732	0.592	0.517	0.37	0.272	0.168	0.117	0.352	0.422	0.319	0.414	0.674	0.236	0.486	1.015	0.362
FBgn0015789	Rab10		protein_coding	0.471	2.25e-09	0.1821	0.05811	0.1075	0.3563	0.0508	0.7406	108.398	95.417	112.29	114.76	68.277	69.981	84.19	82.506	73.002	79.724	73.067	93.68	90.519	88.554	76.381	86.297	88.657	88.085	80.84	68.283
FBgn0038275	CG3817		protein_coding	-0.7374	2.273e-09	-0.1558	0.1822	-0.09921	0.51	-0.3261	0.02394	34.29	26.584	25.479	23.999	53.401	47.101	45.061	43.208	45.386	39.236	35.752	28.287	31.188	33.771	38.576	35.423	30.922	29.375	32.434	26.539
FBgn0036502	CG7841		protein_coding	-1.621	2.297e-09	-0.03669	0.8178	-0.01696	0.9356	-0.007138	0.9855	4.55	7.054	3.926	3.201	17.661	25.241	8.251	9.314	10.387	10.507	13.878	8.727	9.095	11.408	11.806	9.752	11.433	8.175	8.997	16.617
FBgn0284421	Psn		protein_coding	0.4285	2.322e-09	0.1054	0.3568	0.0508	0.683	0.2968	0.001532	77.952	69.781	79.403	82.065	53.681	51.792	58.929	61.601	58.613	54.786	52.452	63.419	61.395	60.672	60.56	51.68	62.968	65.248	71.327	71.534
FBgn0029711	Usf		protein_coding	0.5847	2.549e-09	0.1554	0.1694	0.158	0.2141	0.3098	0.01191	30.979	25.149	21.959	22.634	17.653	17.922	14.709	15.018	13.532	15.739	13.984	19.086	16.662	17.209	16.243	18.033	17.092	21.637	19.307	16.326
FBgn0013343	Syx1A	STX4,STX3,STX1B,STX19,STX11,STX2,STX1A	protein_coding	0.9412	2.739e-09	0.2504	0.04664	0.1807	0.1995	0.4161	0.01014	111.46	71.436	78.796	83.499	46.442	38.25	43.47	44.889	38.981	35.14	33.246	57.302	50.559	49.679	45.636	46.609	48.335	63.224	62.185	37.515
FBgn0261458	capt	CAP2,CAP1	protein_coding	0.5549	2.864e-09	0.1262	0.2857	0.2863	0.008298	0.2031	0.09649	160.28	137.436	152.737	152.654	98.394	81.806	107.797	112.696	90.209	81.813	103.222	101.079	101.72	118.955	119.912	111.307	128.346	109.506	109.702	108.687
FBgn0087007	bbg		protein_coding	0.857	3.109e-09	1.04	1.869e-08	1.044	1.317e-08	1.187	2.338e-11	21.77	24.517	24.394	23.071	12.588	15.901	10.784	10.683	14.571	12.922	12.1	28.245	27.569	26.812	29.474	26.583	26.95	34.19	35.733	21.99
FBgn0039212	Syx18	STX18	protein_coding	0.5536	3.197e-09	0.1866	0.08277	0.2687	0.0222	0.6038	4.59e-07	36.431	34.461	30.134	26.254	22.23	21.084	20.005	21.132	19.325	20.537	17.377	27.953	23.825	20.748	27.161	23.044	24.483	29.351	30.926	30.746
FBgn0039189	CG18528	GTPBP3	protein_coding	0.8349	3.209e-09	0.2317	0.05232	0.2171	0.1172	0.4924	0.001823	30.024	21.751	24.745	21.689	13.096	13.421	13.204	13.351	13.5	14.926	15.135	21.654	18.428	21.885	17.635	19.092	21.373	18.424	19.195	29.769
FBgn0032906	RPA2		protein_coding	-0.6257	3.349e-09	-0.1413	0.2265	-0.1802	0.1539	-0.2631	0.04062	100.174	90.76	112.834	99.552	156.215	139.053	176.537	167.962	167.315	175.437	182.841	145.777	146.544	142.588	142.538	145.69	144.114	120.795	121.543	171.029
FBgn0038292	CG3987		protein_coding	5.081	3.349e-09	0.181	0.2983	0.4564	0.1229	1.164	0.02562	4.076	3.415	2.506	2.286	0.022	0.125	0.082	0.05	0.482	0.372	0.035	2.187	0.546	0.629	0.978	2.905	0.398	2.154	3.086	0.659
FBgn0037713	CG16790	USB1	protein_coding	-1.21	3.691e-09	0.03042	0.8824	-0.003297	0.9943	0.0937	0.6625	3.23	3.171	3.229	2.993	9.959	6.342	7.242	6.945	7.993	8.231	8.591	12.469	7.652	7.786	6.703	11.253	6.754	9.84	9.668	9.089
FBgn0052579	CG32579		protein_coding	0.5698	3.755e-09	0.0442	0.8211	0.07946	0.5904	0.2082	0.1281	24.492	25.617	24.001	28.026	18.885	16.455	15.371	16.329	15.593	14.6	15.363	15.507	16.637	16.607	13.532	17.701	18.44	14.808	17.567	20.964
FBgn0036043	CG8177		protein_coding	-1.394	3.895e-09	-0.3224	0.05404	-0.7878	0.003798	-1.386	2.149e-06	19.407	20.585	20.251	22.424	52.892	54.271	60.168	59.91	75.041	91.037	28.135	44.515	44.252	23.256	41.22	31.233	23.489	25.589	26.685	18.498
FBgn0034443	cer		protein_coding	0.9944	4.175e-09	0.08058	0.5543	0.05934	0.7349	0.1611	0.3767	104.16	58.62	69.587	73.899	36.199	32.451	39.4	39.246	36.9	35.344	58.065	50.65	43.29	66.295	39.038	53.735	54.094	51.953	56.311	52.098
FBgn0265276	l(3)neo38		protein_coding	-1.962	4.29e-09	0.02723	0.8688	0.04143	0.7933	0.07975	0.7127	2.815	2.491	1.601	1.492	9.579	7.773	8.421	9.006	12.139	18.357	7.949	20.472	16.691	8.478	20.114	16.239	9.363	20.685	17.994	7.695
FBgn0259789	zld		protein_coding	0.7074	4.427e-09	0.08148	0.5759	0.1091	0.4477	0.16	0.3007	33.632	31.676	31.593	33.596	21.85	15.989	19.949	19.704	16.226	16.59	14.376	18.262	18.521	17.264	19.612	16.131	18.777	20.984	20.705	13.642
FBgn0020372	TM4SF		protein_coding	1.771	4.43e-09	0.2097	0.1505	0.4606	0.04348	-0.08286	0.7036	86.404	83.08	309.875	321.937	55.216	60.702	49.188	57.314	44.395	52.316	42.97	75.156	84.485	91.571	95.321	80.276	103.761	42.232	40.475	34.814
FBgn0045800	Uhg1		ncRNA	-1.118	4.457e-09	-0.07004	0.6205	-0.1005	0.5179	-0.2208	0.2147	19.827	17.139	13.818	14.443	48.559	41.747	27.77	29.2	31.645	34.801	36.161	24.652	31.172	28.238	26.05	30.623	26.978	22.745	24.068	29.932
FBgn0034447	CG7744		protein_coding	-0.7429	4.785e-09	-0.005822	0.9902	-0.01368	0.9492	-0.1891	0.2224	13.142	15.053	18.497	17.972	26.333	25.686	30.05	29.94	27.18	29.067	22.586	26.646	26.446	24.771	23.709	30.089	23.201	23.066	21.703	20.647
FBgn0262018	CadN2		protein_coding	4.054	5.01e-09	0.6782	0.0711	0.7775	0.05565	1.588	0.009684	7.556	6.302	5.129	4.393	0.246	0.19	0.334	0.419	0.239	0.53	0.977	1.102	1.52	5.856	1.135	0.539	6.647	3.099	3.323	4.395
FBgn0030418	CG4004		protein_coding	0.8393	5.219e-09	0.1946	0.0953	0.2211	0.1091	0.04314	0.8506	20.559	16.433	22.908	23.928	12.345	10.349	11.718	10.788	12.305	14.657	16.412	19	20.866	19.733	15.6	20.314	22.022	18.356	16.633	11.109
FBgn0050417	tbrd-3		protein_coding	4.31	5.239e-09	4.854	0.0002365	5.048	7.803e-05	4.669	0.0001338	2.323	3.688	2.469	2.458	0	0.147	0.096	0.218	0.141	0	0	1.466	1.235	4.886	2.366	2.336	4.556	2.842	3.723	1.014
FBgn0040290	RecQ4	RECQL4	protein_coding	-0.698	5.43e-09	0.0172	0.9569	-0.01718	0.9342	-0.1326	0.4115	8.58	10.166	13.25	11.695	16.547	20.294	18.018	18.398	18.45	16.31	18.763	18.045	17.256	19.855	19.64	13.94	18.637	15.842	13.698	17.396
FBgn0039381	SppL	SPPL3	protein_coding	0.4058	5.525e-09	0.1461	0.1415	0.176	0.08468	0.2322	0.01574	29.465	28.81	33.68	33.673	22.837	24.935	22.242	23.388	23.339	24.864	26.973	31.819	27.785	28.22	31.527	30.427	26.773	30.409	32.508	28.253
FBgn0038381	EndoU		protein_coding	0.865	5.811e-09	0.2592	0.04328	0.3105	0.03407	0.5202	0.002202	9.575	10.608	11.295	11.564	6.701	4.977	5.362	5.772	6.443	7.995	5.463	7.98	12.306	8.881	12.676	8.23	8.8	8.738	10.732	11.991
FBgn0032450	CG5776	SPATA5	protein_coding	-0.5024	5.835e-09	0.04581	0.7965	0.0209	0.8979	-0.04852	0.7801	9.087	10.319	10.079	10.939	14.764	16.022	14.265	13.606	14.675	13.448	14.336	15.708	15.107	14.479	14.808	13.787	15.003	14.832	12.492	13.665
FBgn0037671	VhaM8.9	ATP6AP2	protein_coding	0.4424	5.879e-09	0.1456	0.1586	0.2692	0.004639	0.2695	0.006141	161.066	169.392	153.032	153.748	117.583	120.747	110.929	111.109	112.922	110.325	105.671	132.029	127.808	123.286	130.56	161.047	123.317	140.167	143.695	124.799
FBgn0062565	Or19b		protein_coding	3.427	6.026e-09	3.623	0.0001243	1.516	0.01951	0.3513	0.1635	4.316	3.145	2.98	3.883	0.197	0.425	0.278	0.253	0	0.158	0.221	3.184	3.081	1.135	1.09	1.797	0.381	0.229	1.011	0.315
FBgn0037515	Sp7		protein_coding	1.396	6.08e-09	0.2354	0.1028	0.115	0.4288	0.9302	0.0007511	15.471	17.525	21.766	21.598	5.53	4.715	9.296	8.208	9.74	9.034	5.802	13.543	11.85	15.496	7.415	9.754	15.382	20.873	20.069	12.976
FBgn0040227	eIF3d1	EIF3D	protein_coding	-0.3594	6.161e-09	-0.1644	0.04769	-0.2019	0.0156	-0.2053	0.01262	192.632	192.678	202.675	186.256	231.005	224.142	279.93	270.421	279.784	274.443	255.52	224.21	237.154	236.062	241.077	223.447	223.267	224.781	224.96	240.904
FBgn0032713	CG17323		protein_coding	-1.162	6.171e-09	-0.06338	0.6584	-0.009093	0.9699	-0.281	0.1116	9.581	16.619	11.979	13.136	30.036	30.816	29.806	29.604	29	30.602	30.29	24.099	26.135	24.013	31.403	29.212	27.498	22.114	22.017	19.032
FBgn0261700	CR42736		ncRNA	4.094	6.212e-09	0.1387	0.3599	0.2144	0.2571	2.238	0.003601	15.709	6.106	11.244	9.151	0.181	0.057	1.269	0.611	1.099	0.339	0.379	2.28	2.134	1.29	3.68	1.362	1.09	8.349	5.067	2.817
FBgn0000181	bic	BTF3L4	protein_coding	-0.6614	6.623e-09	-0.2145	0.04769	-0.09639	0.505	-0.2276	0.09796	428.142	476.05	372.125	368.978	698.3	645.082	671.957	665.896	629.097	586.671	753.295	436.74	435.384	622.828	549.96	576.184	612.948	521.707	513.043	562.412
FBgn0026323	Tak1		protein_coding	0.4584	6.656e-09	-0.09941	0.4161	-0.2293	0.02862	-0.2853	0.006138	35.993	32.917	34.084	35.27	23.381	27.84	23.355	24.009	27.196	27.14	26.228	25.119	21.984	24.648	21.487	18.581	25.076	21.817	20.508	21.616
FBgn0029148	NHP2	NHP2	protein_coding	-0.8757	6.71e-09	-0.1577	0.18	-0.2814	0.04508	-0.5369	0.001107	52.547	45.586	44.79	41.399	89.461	77.223	94.851	89.344	109.176	109.043	77.582	77.713	76.425	67.361	73.598	65.868	67.807	58.964	64.3	57.706
FBgn0030170	CG2990		protein_coding	-0.7962	6.823e-09	-0.03362	0.8797	-0.2677	0.04753	-0.4781	0.001676	7.028	6.753	10.359	8.233	13.518	13.347	16.269	15.219	17.04	19.278	14.667	15.515	19.221	12.913	13.982	10.426	12.574	10.191	10.617	11.922
FBgn0036299	Tsf2		protein_coding	0.6075	6.922e-09	0.07339	0.6309	-0.01072	0.9601	0.2053	0.1384	26.836	25.472	30.134	26.341	18.601	15.941	16.694	18.223	17.178	14.318	15.704	17.832	17.528	17.46	11.506	14.765	19.361	17.814	17.549	21.09
FBgn0250791	alphaSnap	NAPA,NAPB	protein_coding	0.3166	6.985e-09	0.02796	0.8617	0.09139	0.3142	0.1334	0.1169	60.423	49.927	55.796	58.748	42.523	46.107	44.895	45.034	51.604	53.67	53.706	55.135	53.869	55.185	54.748	62.13	55.912	59.154	59.703	57.705
FBgn0030701	CG16952	BTBD7	protein_coding	0.3779	7.028e-09	0.2299	0.003458	0.09469	0.3647	0.1955	0.03349	39.914	38.501	42.002	42.226	29.651	31.948	30.936	30.956	31.413	31.52	28.1	38.075	40.487	33.711	39.287	29.086	31.772	34.785	37.419	33.716
FBgn0053970	CG33970		protein_coding	2.121	7.028e-09	0.71	0.03003	1.2	0.005122	2.069	2.168e-06	1.595	1.47	2.357	2.243	0.33	0.571	0.409	0.326	0.851	1.246	1.607	3.159	2.708	3.504	3.038	3.609	4.113	3.673	3.771	9.842
FBgn0264302	CG43780		protein_coding	0.6487	7.142e-09	0.1491	0.2019	0.06414	0.6898	0.3598	0.006744	69.187	56.737	57.483	59.709	40.259	34.916	37.176	38.038	39.89	37.688	28.619	45.467	41.092	44.452	36.772	34.167	44.006	54.355	42.434	49.324
FBgn0264303	CG43781		protein_coding	0.6487	7.142e-09	0.1491	0.2019	0.06414	0.6898	0.3598	0.006744	69.187	56.737	57.483	59.709	40.259	34.916	37.176	38.038	39.89	37.688	28.619	45.467	41.092	44.452	36.772	34.167	44.006	54.355	42.434	49.324
FBgn0020278	loco		protein_coding	0.5267	7.176e-09	0.104	0.409	0.3113	0.003502	0.674	6.101e-10	33.742	35.927	35.093	33.801	23.619	26.612	20.828	22.832	17.868	17.576	19.218	19.025	19.286	23.968	25.6	21.883	25.294	30.398	30.005	30.387
FBgn0002525	Lam		protein_coding	-0.4949	7.185e-09	-0.05067	0.7541	-0.134	0.2541	-0.2317	0.03456	146.205	153.628	180.373	179.325	219.23	193.394	269.523	268.332	220.552	228.801	215.811	207.459	206.244	209.089	207.431	172.436	201.695	190.686	191.354	167.778
FBgn0039827	CG1544	DHTKD1	protein_coding	-4.138	7.185e-09	-0.0007181	1	-0.3407	0.1395	-0.3331	0.1512	0	0.034	0.051	0.086	0.614	0.095	1.573	1.494	1.95	1.255	0.998	1.738	1.499	0.928	0.124	0.672	0.605	0.908	0.223	0.604
FBgn0034657	LBR		protein_coding	-0.6409	7.225e-09	0.004049	0.9947	-0.02206	0.9053	-0.3191	0.01405	32.685	39.892	45.758	44.023	58.183	53.029	76.6	73.226	62.505	66.697	55.541	66.437	63.849	55.769	64.693	62.021	52.449	49.494	48.632	41.417
FBgn0039507	mrt		protein_coding	0.7428	7.319e-09	0.2008	0.07979	0.1975	0.1461	0.4061	0.005389	14.373	16.736	17.191	18.451	9.455	11.008	8.703	9.443	11.028	8.458	10.897	12.812	13.464	14.692	14.459	11.436	13.276	16.006	13.751	14.727
FBgn0020909	Rtc1	RCL1	protein_coding	-0.5498	7.355e-09	-0.052	0.7578	0.02257	0.8962	0.04555	0.8074	28.599	28.599	25.745	23.115	41.309	44.814	37.691	35.19	36.522	35.275	36.745	34.662	30.408	35.48	39.722	37.366	35.369	33.964	39.304	38.866
FBgn0033589	CG13227		protein_coding	2.455	7.401e-09	0.1232	0.3461	0.07419	0.5882	0.155	0.4081	8.616	7.363	12.19	13.204	1.428	0.797	3.05	1.679	2.835	1.277	1.121	3.983	4.361	2.313	2.159	2.198	3.371	1.056	2.595	3.999
FBgn0037051	CG10565		protein_coding	-0.3337	7.551e-09	-0.09999	0.3044	-0.1632	0.05292	-0.2592	0.0005608	96.483	100.349	95.055	91.304	115.324	116.442	131.465	124.734	130.395	125.27	109.091	109.591	114.853	107.133	105.095	111.869	102.146	99.743	106.559	93.599
FBgn0261046	Dscam3		protein_coding	1.212	7.607e-09	0.2101	0.1072	1.005	0.0002023	1.404	5.797e-08	85.454	87.447	82.297	87.152	35.873	37.032	33.447	34.874	27.547	32.922	26.664	51.473	44.94	39.01	78.776	61.622	45.702	97.476	105.642	36.109
FBgn0031020	Naa15-16	NAA16,NAA15	protein_coding	-0.435	7.704e-09	-0.1761	0.06138	-0.2224	0.02394	-0.296	0.001931	59.959	65.639	61.13	56.211	79.188	81.366	87.52	86.472	80.272	84.039	72.04	65.923	68.488	63.515	71.437	59.864	63.663	51.54	61.625	72.299
FBgn0013770	Cp1		protein_coding	0.5767	7.779e-09	-0.1163	0.348	-0.06862	0.6325	-0.1209	0.4023	545.399	387.371	598.776	560.604	296.673	348.557	364.672	355.823	435.769	417.864	497.658	367.405	359.394	432.139	392.932	404.356	442.764	398.385	423.729	391.12
FBgn0039182	CG5728		protein_coding	-0.6979	7.937e-09	-0.1169	0.3567	-0.2603	0.04219	-0.2874	0.03876	24.39	29.054	28.398	26.827	41.111	48.191	46.218	46.525	47.923	47.099	35.362	34.717	41.644	31.961	38.054	28.518	31.337	32.482	35.227	31.948
FBgn0264384	CR43836		ncRNA	1.181	7.94e-09	0.3364	0.0492	0.1842	0.2045	1.187	2.858e-05	9.132	5.503	7.618	6.383	3.204	3.314	2.508	2.966	1.034	2.965	3.565	4.979	3.944	4.866	4.384	3.205	4.213	7.426	7.054	5.263
FBgn0032925	CG9246	NOC2L	protein_coding	-0.7962	8.005e-09	-0.09729	0.4673	-0.2312	0.08841	-0.3472	0.01967	32.512	28.334	31.623	28.411	50.044	52.038	58.479	56.843	71.223	62.889	41.234	50.187	55.249	40.691	45.957	44.472	40.745	40.079	44.85	40.023
FBgn0014879	Set		protein_coding	-0.5108	8.103e-09	-0.02434	0.919	-0.07513	0.5689	-0.266	0.01687	139.551	122.895	153.985	145.167	194.975	168.044	236.243	220.028	223.912	227.128	203.727	201.072	227.785	203.745	187.841	223.189	188.724	163.722	182.462	177.406
FBgn0263706	CG43658		protein_coding	0.7507	8.57e-09	0.144	0.2257	0.01597	0.9407	0.3155	0.02924	31.774	27.656	26.854	27.66	15.721	18.248	15.55	15.938	11.912	11.915	10.934	14.868	12.882	16.199	10.148	8.605	16.752	14.095	15.876	16.905
FBgn0086604	CG12484		protein_coding	2.232	8.959e-09	0.001843	1	-0.01395	0.9403	0.4815	0.05754	7.126	12.017	5.676	5.334	1.485	2.401	1.065	0.969	2.032	1.853	0.96	2.103	1.848	0.973	2.041	1.542	0.925	4.591	5.176	1.053
FBgn0036423	CG3919		protein_coding	-1.416	9.118e-09	-0.3004	0.07021	-0.331	0.06332	-0.4724	0.02521	2.967	2.604	3.101	3.126	8.864	8.219	6.964	8.926	8.639	9.158	8.217	7.25	3.373	4.366	4.772	3.326	6.672	2.083	3.069	8.035
FBgn0260482	CG32599		protein_coding	-3.123	9.319e-09	-0.7284	0.05037	-1.407	0.01159	-3.538	1.375e-07	1.795	2.359	1.648	1.68	20.825	17.09	18.67	17.67	15.646	14.694	40.021	2.63	6.661	10.21	3.824	1.896	10.303	1.295	0.424	2.972
FBgn0030893	RhoGAP16F		protein_coding	-1.162	9.319e-09	-0.02478	0.9106	-0.0001445	1	0.009995	0.9749	2.613	3.379	2.474	2.436	6.544	6.693	5.757	6.577	4.657	5.534	7.106	5.715	4.141	6.172	5.673	4.739	6.91	5.606	5.154	6.779
FBgn0037551	Gie		protein_coding	0.4597	9.425e-09	0.09351	0.4633	0.07194	0.5817	0.03917	0.8225	35.428	28.567	30.912	32.762	22.816	23.404	21.176	23.29	22.051	25.06	28.551	29.165	25.496	30.658	26.994	26.09	29.489	25.065	27.449	26.149
FBgn0014000	Hf		protein_coding	-1.559	9.577e-09	-1.983	5.121e-09	-2.088	7.189e-10	-3.011	2.511e-18	8.362	8.171	9.622	8.969	27.417	24.828	29.486	27.232	40.139	35.823	40.46	10.169	10.586	7.198	10.321	6.868	8.738	1.783	5.254	5.589
FBgn0284251	l(2)05287		protein_coding	-0.6065	9.577e-09	-0.1108	0.3826	-0.05428	0.7293	-0.173	0.2184	23.672	23.303	24.096	21.904	34.011	37.671	37.055	36.909	36.676	34.313	28.626	28.387	30.626	25.993	35.158	31.025	26.599	28.222	29.577	27.13
FBgn0003435	sm	HNRNPLL,HNRNPL	protein_coding	-1.993	9.967e-09	-0.05008	0.6849	-0.1039	0.4568	-0.3122	0.1244	0.194	0.16	0.277	0.249	0.865	0.773	1.107	1.011	1.475	1.791	0.772	1.244	1.266	0.472	1.232	0.999	0.511	0.88	1.116	0.283
FBgn0024836	stan		protein_coding	3.122	1.051e-08	0.113	0.3809	0.1299	0.377	0.2725	0.2018	15.915	10.107	18.93	19.844	0.841	1.235	2.221	2.238	3.581	3.866	0.857	7.554	7.606	3.198	7.408	4.601	4.966	8.693	7.681	2.36
FBgn0031762	CG9098	BCAR3	protein_coding	-1.781	1.059e-08	-0.03422	0.8238	-0.04915	0.7601	-0.2789	0.1508	3.701	3.798	1.599	1.323	8.967	10.208	9.634	9.039	13.878	11.993	9.722	8.566	10.611	10.133	11.75	10.436	7.425	10.151	9.381	2.329
FBgn0259821	CG42402		protein_coding	1.507	1.059e-08	-0.1067	0.3603	-0.04334	0.797	0.06081	0.7975	25.151	27.178	20.961	22.776	7.284	13.101	5.58	6.174	5.6	6.288	12.48	5.676	4.023	6.725	6.306	7.174	7.808	7.784	8.527	10.944
FBgn0021944	Coprox	CPOX	protein_coding	-0.6237	1.069e-08	-0.1266	0.3027	-0.08514	0.5601	-0.1388	0.36	43.936	49.905	49.481	46.734	76.079	54.191	88.832	82.862	60.315	57.425	59.19	48.531	45.339	53.342	56.61	53.439	48.736	54.436	42.968	57.738
FBgn0039113	CG10217		protein_coding	0.6703	1.101e-08	0.2	0.07329	0.03661	0.8314	0.3997	0.00356	38.733	28.841	36.186	33.639	20.708	18.221	21.07	23.624	20.953	17.239	19.5	27.173	25.773	23.361	18.437	15.996	25.893	25.301	23.704	32.64
FBgn0039026	CG7029		protein_coding	0.757	1.129e-08	0.161	0.1678	0.2826	0.03393	0.5606	0.0001532	31.671	34.953	34.491	35.103	18.079	22.639	18.178	18.967	20.393	22.548	15.821	28.073	24.937	23.052	29.885	25.466	25.867	35.932	36.989	22.087
FBgn0086251	del		protein_coding	-0.6752	1.134e-08	-0.04874	0.7906	-0.3305	0.008524	-0.3138	0.02144	22.657	29.794	26.038	27.329	40.888	45.726	43.973	43.968	47.136	40.397	39.869	36.545	41.076	39.397	28.697	26.057	35.673	27.735	26.934	40.069
FBgn0050359	Mal-A5		protein_coding	-1.857	1.144e-08	-0.08933	0.4329	-0.1978	0.1994	-1.326	0.0005886	20.213	19.776	36.937	36.289	78.29	74.994	151.266	131.645	226.957	232.853	126.027	157.009	156.781	65.509	139.316	139.347	61.878	81.808	90.524	31.231
FBgn0052152	CG32152		protein_coding	-0.5995	1.184e-08	-0.05613	0.7345	-0.1568	0.228	-0.1061	0.5106	12.203	12.51	11.133	11.288	17.59	18.428	18.02	19.421	15.008	16.106	12.186	13.144	13.442	12.936	12.38	10.877	12.762	10.518	12.506	15.335
FBgn0032049	Bace		protein_coding	-9.894	1.185e-08	0.009622	0.9671	0.03925	0.7946	0.007451	0.9762	0	0	0	0	0	0	0	0.026	0.505	0.39	0	0.546	0.736	0	0.897	1.479	0	0.376	0.555	0.086
FBgn0020633	Mcm7	MCM7	protein_coding	-0.7545	1.242e-08	-0.0186	0.9529	-0.01768	0.9342	-0.261	0.07908	63.953	65.141	87.594	80.303	117.189	113.025	146.036	142.72	119.233	129.416	141.414	113.418	119.496	143.116	130.428	114.082	134.731	95.573	101.484	104.77
FBgn0033548	CG7637	NOP10	protein_coding	-0.8578	1.378e-08	-0.1401	0.2415	-0.1879	0.1775	-0.3569	0.02356	68.169	74.424	51.273	55.431	121.111	109.802	129.185	109.243	157.903	174.624	122.848	112.896	118.236	116.564	107.304	144.88	95.597	103.612	117.534	95.467
FBgn0004133	blow		protein_coding	0.8453	1.401e-08	0.1181	0.3448	0.2497	0.07157	0.3799	0.01446	134.921	103.987	86.153	92.079	52.488	51.792	62.179	56.884	54.275	60.871	49.816	70.386	72.093	65.24	85.315	72.165	70.618	96.831	86.006	57.98
FBgn0266685	CR45175		ncRNA	2.188	1.461e-08	0.2342	0.1782	0.2923	0.1451	0.1965	0.3062	6.827	6.146	4.881	4.099	1.311	1.203	1.066	0.843	1.773	0.948	0.471	4.423	1.193	1.602	2.285	2.256	2.284	1.525	1.498	2.099
FBgn0284257	Ttd14		protein_coding	-0.4807	1.476e-08	-0.01877	0.9443	0.003995	0.9881	-0.07406	0.6266	26.127	30.67	26.163	24.361	37.028	39.937	37.555	38.738	29.699	28.67	33.839	30.285	28.767	30.992	34.674	28.763	29.894	25.961	26.146	33.565
FBgn0027080	TyrRS	YARS	protein_coding	-0.4903	1.489e-08	-0.1508	0.1663	-0.1115	0.3685	-0.09082	0.5275	43.942	48.814	46.471	44.171	62.429	59.823	69.791	71.839	62.603	55.15	65.933	45.607	48.595	59.631	52.319	53.717	56.844	54.862	49.697	64.482
FBgn0013763	Idgf6		protein_coding	1.835	1.524e-08	1.071	0.006148	2.03	3.453e-07	1.745	1.07e-05	188.059	203.984	196.77	181.968	52.795	92.145	30.606	27.556	33.602	45.4	98.643	144.63	150.548	164.257	297.571	309	181.243	287.21	289.284	75.636
FBgn0024556	mEFTu1	TUFM	protein_coding	-0.4768	1.551e-08	-0.2373	0.01016	-0.3076	0.001997	-0.4231	3.017e-05	114.963	121.606	122.671	114.712	157.437	141.333	190.832	184.945	175.345	175.859	173.158	127.48	140.945	142.423	132.727	134.781	132.082	114.96	121.794	137.231
FBgn0039089	beat-IV		protein_coding	6.665	1.551e-08	0.04775	0.7107	0.2146	0.2728	3.604	0.0004285	0.659	0.687	0.516	0.542	0	0.009	0	0	0.071	0.055	0	0.184	0.103	0	0	0.33	0.132	0.951	1.48	0.145
FBgn0037217	CG14636		protein_coding	1.989	1.57e-08	1.015	0.01228	1.301	0.003493	1.226	0.002631	16.054	14.25	10.343	11.415	4.449	2.871	2.343	2.553	2.646	2.973	2.732	9.984	7.011	6.123	8.914	8.039	8.207	8.604	6.605	9.294
FBgn0036035	CG18178		protein_coding	-0.7231	1.595e-08	-0.1196	0.3416	-0.2005	0.1375	-0.2756	0.06094	30.353	28.364	27.346	26.934	50.963	46.228	47.253	48.377	57.907	52.864	36.023	39.376	43.885	36.244	44.293	38.048	32.363	41.249	41.23	30.441
FBgn0033494	KCNQ		protein_coding	3.021	1.613e-08	0.1156	0.3721	0.1855	0.2633	0.362	0.1295	27.751	31.2	31.161	31.739	3.613	5.573	1.702	2.308	2.274	2.896	11.409	6.536	6.12	23.884	7.113	6.352	24.436	14.975	15.356	11.047
FBgn0032895	twit		protein_coding	-3.276	1.671e-08	-0.1651	0.2834	-0.8751	0.03925	-2.411	0.0005097	3.48	5.276	5.86	5.732	56.66	14.777	72.086	83.782	20.711	12.556	28.532	3.089	4.929	15.474	1.261	3.318	10.661	0.463	1.478	6.054
FBgn0087011	CG41520		protein_coding	-1.663	1.671e-08	0.1706	0.1909	0.1886	0.204	0.814	0.00431	0.859	0.799	0.58	0.429	2.969	2.714	1.527	1.64	2.247	2.064	2.305	4.522	3.688	2.983	4.188	4.004	2.523	4.503	5.105	4.907
FBgn0033913	CG8468		protein_coding	2.341	1.751e-08	-0.03459	0.7897	-0.1092	0.4305	-0.1724	0.36	15.821	9.292	12.134	8.765	1.247	2.239	2.921	1.886	9.531	9.357	3.746	5.809	7.651	3.492	5.264	5.344	3.095	5.847	6.735	1.573
FBgn0259244	CG42342		protein_coding	1.264	1.797e-08	0.0126	0.9652	0.02331	0.9076	0.09442	0.6622	53.466	42.325	44.637	47.069	18.618	14.78	19.825	21.149	29.085	31.76	20.743	31.965	29.065	24.475	32.635	28.258	25.849	37.428	37.825	19.217
FBgn0031252	CG13690	RNASEH2A	protein_coding	-0.7174	1.832e-08	-0.04886	0.7896	-0.09812	0.5162	-0.4907	0.0007102	35.413	32.004	33.046	29.254	58.766	52.543	55.394	53.83	52.461	51.454	72.074	49.283	53.14	58.585	48.344	48.663	56.288	39.088	37.656	38.074
FBgn0001227	Hsp67Ba		protein_coding	3.154	1.835e-08	0.4164	0.1094	0.1197	0.4105	0.2436	0.2367	140.465	46.123	137.637	112.16	10.06	5.812	13.844	13.06	30.029	33.964	8.83	105.424	113.07	17.847	57.443	74.566	15.087	44.852	63.993	50.849
FBgn0034075	Asph		protein_coding	-2.253	1.857e-08	-0.1493	0.2426	-0.08937	0.5356	-0.3059	0.1245	0.02	0.097	0.167	0.166	0.307	0.282	1.032	0.85	2.893	2.721	1.655	1.709	1.503	1.009	1.876	1.776	1.599	1.089	1.73	1.307
FBgn0005671	Vha55	ATP6V1B2	protein_coding	0.4778	1.867e-08	0.06976	0.6309	0.215	0.04751	0.1574	0.1896	130.13	138.393	116.935	120.179	85.486	101.94	84.474	83.103	101.775	94.609	88.395	113.971	96.948	99.995	131.081	110.392	106.123	115.037	116.132	94.43
FBgn0028484	Ack	TNK2	protein_coding	0.4667	1.876e-08	0.184	0.0666	0.1622	0.161	0.2594	0.01799	25.022	22.749	27.374	27.697	17.952	18.849	17.627	18.397	16.129	16.853	18.211	22.851	21.302	18.821	20.019	19.807	20.293	21.208	24.292	18.419
FBgn0041721	snRNA:U12		snRNA	2.185	1.887e-08	-0.03255	0.815	-0.07058	0.6147	-0.1589	0.4002	34.344	10.535	14.781	14.509	3.573	1.558	4.59	5.257	21.015	16.23	9.493	8.436	16.525	10.448	9.142	9.308	13.344	7.829	8.242	12.573
FBgn0038601	CG18600		protein_coding	-0.5754	1.893e-08	-0.186	0.08571	-0.3085	0.008266	-0.09847	0.5371	24.568	24.008	26.036	24.109	35.695	41.276	37.54	36.829	46.826	46.505	38.675	32.657	39.021	32.425	30.392	34.728	31.967	39.345	36.163	44.009
FBgn0051720	mthl15		protein_coding	-2.512	1.954e-08	-1.499	0.004258	-1.554	0.003026	-1.816	0.0004782	0.3	0.283	0.297	0.266	1.822	2.157	1.755	1.492	1.932	2.529	6.754	0.653	0.775	1.617	0.511	0.564	1.849	0.845	0.692	1.077
FBgn0259140	CG42255	CUBN	protein_coding	-1.826	1.98e-08	-0.06107	0.6097	-0.9259	0.009219	-0.611	0.02153	0.54	0.69	0.566	0.65	2.48	1.421	2.457	2.886	2.318	3.228	1.61	1.807	1.642	1.659	0.907	0.67	1.299	0.689	0.619	1.914
FBgn0030000	CG2260	WDR46	protein_coding	-0.6098	2.059e-08	-0.135	0.2562	-0.186	0.1492	-0.2217	0.108	22.306	22.195	21.313	20.082	33.526	33.688	34.846	32.983	39.696	31.849	26.828	32.521	25.975	22.762	28.23	30.645	21.082	25.636	27.93	26.085
FBgn0034703	CG3045	PUS3	protein_coding	-0.7063	2.068e-08	-0.0335	0.8816	0.001094	1	-0.09514	0.6083	10.189	12.604	9.624	11.854	19.512	21.273	14.743	19.231	17.186	19.467	18.773	18.666	15.372	18.084	22.461	19.167	14.79	15.206	19.109	15.827
FBgn0037248	srl		protein_coding	-0.9527	2.088e-08	-0.08684	0.5152	-0.2029	0.1517	-0.2023	0.2431	15.572	17.835	18.37	18.299	33.253	38.671	34.026	35.748	46.178	45.41	26.338	38.26	32.594	25.01	32.382	27.785	26.094	35.209	34.033	23.891
FBgn0259992	CG42489		protein_coding	-2.768	2.104e-08	-0.7124	0.04528	-2.872	4.564e-06	-2.999	1.123e-06	0.776	2.134	1.883	0.763	15.361	9.955	9.776	8.39	16.831	21.664	18.651	9.388	6.153	2.952	1.929	2.431	2.245	2.023	3.776	0.464
FBgn0035336	CG9004	NOM1	protein_coding	-0.5143	2.183e-08	-0.1329	0.2494	-0.3204	0.003106	-0.4034	0.0003667	22.041	22.647	24.756	24.25	32.577	34.229	35.304	35.226	37.599	36.203	29.41	29.427	31.439	26.601	23.235	28.95	24.247	25.459	23.132	25.347
FBgn0016917	Stat92E	STAT5B,STAT5A,STAT6	protein_coding	0.694	2.188e-08	0.8024	6.961e-07	0.5434	0.0001519	0.4223	0.002236	134.792	135.102	191.098	192.287	82.918	95.674	106.939	104.961	98.424	110.715	92.231	191.668	181.659	160.564	167.753	148.652	161.754	166.101	159.719	113.111
FBgn0032943	Tsp39D		protein_coding	0.7692	2.43e-08	0.2073	0.07685	0.4955	0.001663	0.1568	0.36	19.779	17.962	20.416	23.287	11.301	8.304	13.12	13.37	11.51	12.32	9.295	14.206	17.26	14.231	16.68	21.181	14.841	15.459	13.749	10.588
FBgn0037183	CG14451		protein_coding	-1.927	2.455e-08	-0.03446	0.8065	-0.09082	0.5196	-0.3989	0.08408	1.284	0.989	0.575	1.165	5.161	3.441	3.614	3.714	2.487	2.241	3.276	2.329	2.281	1.893	1.262	1.713	2.313	0.926	0.607	1.913
FBgn0260005	wtrw		protein_coding	-1.723	2.661e-08	-0.4417	0.05037	-0.1908	0.2052	-0.8635	0.005319	1.54	2.71	1.169	0.834	8.666	7.181	2.891	3.202	9.653	9.73	8.007	5.8	4.556	3.007	6.353	5.383	4.786	3.474	4.672	3.566
FBgn0262617	CG43143		protein_coding	1.107	2.719e-08	0.4754	0.01477	0.92	0.0003194	0.9028	0.0001188	14.754	19.062	16.572	17.448	7.303	10.39	5.971	6.344	7.59	7.794	5.936	13.754	13.188	9.988	19.631	13.584	10.157	16.885	18.262	8.869
FBgn0039487	gb		protein_coding	-0.6852	2.771e-08	-0.06391	0.6909	-0.02348	0.9053	-0.1325	0.4404	4.556	5.347	4.795	4.884	7.448	11.21	7.048	6.886	6.96	6.946	8.204	6.506	6.365	6.842	7.157	6.352	7.82	6.97	6.601	6.095
FBgn0041625	Or65a		protein_coding	2.523	2.849e-08	0.06606	0.5668	0.01877	0.9053	-0.02179	0.9235	6.179	6.118	3.675	2.653	0.887	1.059	0.387	0.558	0.38	0.587	0.532	0.862	0.738	1.177	1.012	0.196	0.648	0.212	0.417	0.584
FBgn0031360	CG31937	DHRS7	protein_coding	-0.9437	2.854e-08	-0.2128	0.08853	-0.1101	0.4671	-0.1829	0.3059	14.382	22.616	11.592	13.946	35.97	28.34	31.232	30.399	25.547	24.39	22.595	15.392	17.292	16.343	18.99	19.645	20.399	18.211	15.243	23.777
FBgn0032897	CG9336		protein_coding	-1.468	2.943e-08	-0.2704	0.09066	-0.04395	0.7937	-1.241	0.0001185	96.899	155.112	104.335	153.676	460.02	290.217	348.222	388.715	199.071	262.408	416.22	129.466	139.413	226.845	266.125	232.363	266.868	128.46	123.783	88.184
FBgn0039828	CG1542	EBNA1BP2	protein_coding	-0.5941	2.943e-08	-0.2345	0.02873	-0.2257	0.0697	-0.2473	0.06379	59.467	49.729	46.716	45.617	86.722	81.274	72.939	71.867	77.352	79.091	63.857	49.133	64.306	51.699	56.937	62.606	53.544	53.371	68.152	53.934
FBgn0032779	CG16771		protein_coding	0.9296	2.979e-08	1.096	1.543e-06	0.27	0.06723	0.5362	0.003242	8.156	6.345	9.02	8.525	3.504	3.347	4.89	4.382	5.366	3.074	4.199	9.863	10.735	7.05	6.223	5.656	6.634	6.514	8.625	6.05
FBgn0030870	CG6398		protein_coding	2.45	2.986e-08	0.005702	0.9821	0.01342	0.9418	0.1021	0.6063	1.295	1.424	3.09	1.942	0.265	0.266	0.39	0.373	3.986	4.617	1.875	5.404	3.93	1.734	3.494	5.242	2.547	5.939	6.632	1.796
FBgn0039930	CG11077	MPV17	protein_coding	-0.6832	3.147e-08	-0.06037	0.7131	-0.06962	0.6642	-0.01023	0.9708	20.697	26.715	20.122	21.659	33.758	42.141	37.514	35.142	51.83	47.791	54.114	48.107	45.63	44.906	33.784	54.996	48.81	59.67	49.874	45.423
FBgn0051145	CG31145	FAM20C	protein_coding	1.198	3.202e-08	0.02261	0.9188	-0.07775	0.6218	0.1015	0.6341	10.658	6.591	6.573	5.624	3.837	3.518	1.964	2.85	3.034	3.032	2.783	2.998	3.509	3.112	2.457	2.539	2.255	4.468	3.517	2.593
FBgn0027783	SMC2	SMC2	protein_coding	-0.413	3.271e-08	-0.02554	0.9038	-0.07001	0.5533	-0.2052	0.04218	47.902	50.851	52.314	50.515	63.71	66.542	72.43	70.713	61.964	66.422	58.78	60.98	68.495	51.974	60.049	58.7	54.864	53.887	52.027	52.843
FBgn0036519	CG7650		protein_coding	0.6484	3.327e-08	0.3156	0.00961	0.2432	0.06521	0.2177	0.1512	18.904	17.73	21.471	21.152	11.896	10.52	13.751	12.859	10.491	11.77	11.492	16.271	16.181	16.467	13.815	14.505	16.355	15.369	14.635	12.65
FBgn0026404	Dronc		protein_coding	0.5775	3.502e-08	0.1974	0.07093	0.1113	0.4283	0.6708	3.631e-07	25.649	22.447	26.581	27.792	17.824	17.312	15.32	16.146	18.912	13.647	12.257	19.008	18.772	19.475	15.208	15.575	19.574	26.289	22.781	25.609
FBgn0262515	VhaAC45		protein_coding	0.3898	3.527e-08	-0.007167	0.9821	0.1251	0.2352	0.2643	0.004042	126.806	131.701	115.169	119.171	94.832	105.001	84.032	86.165	94.536	87.263	90.709	92.141	87.402	90.487	103.859	102.1	100.204	123.773	108.624	104.511
FBgn0032863	Cdc23	CDC23	protein_coding	-0.6617	3.738e-08	-0.07253	0.637	-0.06817	0.6747	-0.107	0.5413	12.528	12.481	10.281	10.482	20.419	20.049	17.467	16.796	16.315	14.585	17.599	13.335	14.319	15.028	14.698	14.096	15.162	17.472	12.963	13.908
FBgn0001098	Gdh	GLUD2,GLUD1	protein_coding	-0.7073	3.847e-08	-0.1573	0.1776	-0.3685	0.005727	-1.2	2.009e-14	175.775	179.006	209.464	202.656	297.967	265.256	381.771	352.632	401.785	402.691	271.385	304.59	318.534	218.368	271.254	238.629	227.41	156.67	163.039	142.362
FBgn0031117	GstT3		protein_coding	0.7519	3.871e-08	0.671	0.0001532	0.7127	3.355e-05	0.3216	0.03145	110.021	111.168	166.814	179.175	79.59	65.27	87.595	92.154	68.895	69.866	76.029	107.057	119.476	134.132	119.736	126.306	126.84	110.249	94.381	90.732
FBgn0032138	CG4364	PES1	protein_coding	-0.696	3.936e-08	-0.06781	0.6686	0.02623	0.8911	-0.006631	0.9843	105.909	123.331	95.597	100.056	190.964	188.612	160.461	172.871	130.076	127.561	157.286	102.158	118.669	146.601	141.202	138.946	152.135	139.362	140.813	132.314
FBgn0038516	P5cr-2	PYCR3	protein_coding	2.213	3.971e-08	0.01406	0.9375	0.04961	0.7275	0.201	0.2978	2.228	2.038	2.252	2.292	0.541	0.489	0.502	0.203	0.656	0.633	0.389	0.851	0.558	0.535	0.5	0.932	0.763	0.55	1.531	0.799
FBgn0029755	Sas10	UTP3	protein_coding	-0.5432	3.977e-08	-0.1153	0.3585	-0.11	0.4159	-0.3856	0.001788	25.087	26.776	24.521	24.048	37.077	34.724	40.361	38.418	35.375	35.836	28.407	27.489	31.44	25.887	30.094	32.266	25.182	23.21	27.996	20.638
FBgn0259483	Mob4	HSPE1-MOB4,MOB4	protein_coding	0.3275	4.028e-08	0.08689	0.4273	0.1536	0.09828	0.1701	0.05614	90.816	103.665	85.163	88.098	72.83	74.968	71.61	70.637	68.312	63.978	70.074	72.887	76.088	72.205	78.837	77.847	74.481	76.348	83.18	72.374
FBgn0031526	CG8838		protein_coding	1.8	4.079e-08	0.5917	0.03787	1.559	0.0003793	2.417	2.172e-09	23.539	14.533	21.133	17.164	5.211	3.429	6.154	5.787	2.57	4.442	5.541	12.698	8.56	8.625	17.704	14.166	10.475	29.546	34.677	11.235
FBgn0264835	CR44043		ncRNA	1.693	4.089e-08	0.3895	0.06893	0.8588	0.01169	1.169	0.001648	6.074	7.498	4.913	5.795	2.268	2.79	0.799	1.187	1.344	1.705	1.821	3.984	2.984	3.32	4.093	4.117	3.632	4.184	4.902	4.16
FBgn0038638	CG7702		protein_coding	1.437	4.119e-08	0.08039	0.5002	0.07416	0.6327	0.1849	0.3285	49.301	42.364	85.658	88.245	15.552	14.575	30.579	32.302	32.15	31.6	23.752	39.316	37.724	43.768	34.093	33.583	41.415	44.513	40.582	34.827
FBgn0263116	5-HT1B		protein_coding	-2.986	4.165e-08	-1.394	0.02539	-0.6823	0.06629	-0.7682	0.04675	0.148	0.324	0.172	0.39	3.347	1.719	1.96	2.404	0.207	0.297	0.638	0.115	0.057	0.019	0.225	0	0.073	0.066	0.13	0.076
FBgn0036782	CG7320		protein_coding	4.017	4.332e-08	0.1568	0.3248	0.2069	0.2644	0.06037	0.7552	1.01	1.264	1.225	1.334	0	0.199	0.02	0.018	0.235	0.227	0.025	0.458	0.229	0.768	0.448	0.243	0.73	0.526	0.194	0.091
FBgn0020305	dbe	KRR1	protein_coding	-0.4937	4.347e-08	-0.08691	0.5282	-0.08416	0.5412	-0.189	0.1443	33.914	28.479	29.645	28.875	48.058	36.19	44.999	44.815	40.399	32.131	33.799	28.672	33.189	31.871	31.063	30.326	33.844	27.855	30.791	30.302
FBgn0085422	CG34393		protein_coding	1.81	4.551e-08	1.783	0.0001808	1.892	5.035e-05	1.881	3.258e-05	1.942	1.782	1.23	1.284	0.428	0.528	0.326	0.37	0.599	0.216	0.43	1.398	1.28	2.007	1.52	0.991	2.477	1.518	1.579	1.925
FBgn0040968	CG14933		protein_coding	6.304	4.551e-08	0.01733	0.9142	0.05699	0.6901	0.1915	0.338	1.15	1.396	1.087	1.378	0.028	0	0	0	0.201	0.388	0	0.782	0.098	0	0.918	0.208	0.062	0.674	0.773	0.155
FBgn0001229	Hsp67Bc		protein_coding	3.343	4.613e-08	1.533	0.01527	0.464	0.104	1.241	0.01552	10.093	3.607	25.653	22.39	1.061	0.376	1.558	2.237	1.207	1.025	1.977	9.232	10.313	4.488	3.858	5.611	5.687	6.473	7.155	6.744
FBgn0031413	CG9967		protein_coding	0.6715	4.806e-08	0.4184	0.003287	0.2143	0.1162	0.2823	0.06247	10.888	9.956	13.339	12.078	5.962	6.412	8.214	7.575	7.481	6.551	8.035	8.575	12.716	12.247	8.746	10.216	9.983	9.256	8.728	10.96
FBgn0036460	CG5114		protein_coding	-0.6334	4.906e-08	-0.1151	0.3658	-0.07978	0.6026	-0.1413	0.3699	28.608	30.923	19.918	20.383	40.975	43.668	39.487	35.649	44.221	39.792	33.137	34.285	33.545	29.892	34.815	39.793	30.233	35.137	32.258	34.442
FBgn0263740	eIF2gamma		protein_coding	-0.4037	5.052e-08	-0.09083	0.4466	-0.03037	0.8089	-0.1182	0.2967	119.155	129.584	136.882	133.915	162.661	159.24	191.217	186.735	168.819	176.548	172.391	143.711	166.448	158.275	178.198	173.907	147.82	157.322	160.756	152.74
FBgn0031632	CG15628		protein_coding	-4.046	5.25e-08	0.02663	0.8456	0.08038	0.5591	-0.0382	0.8552	0.065	0.064	0	0.064	1.747	0.495	0.792	0.721	0.999	0.959	0.483	2.317	0.735	0.494	2.029	1.941	0.582	1.151	0.865	0.062
FBgn0014861	Mcm2	MCM2	protein_coding	-0.8442	5.337e-08	-0.06242	0.6916	-0.08663	0.5875	-0.2342	0.1514	48.918	53.796	68.817	64.645	103.368	103.779	118.541	116.744	88.925	97.332	113.666	71.783	84.38	104.551	81.027	75.507	102.455	73.758	66.742	91.665
FBgn0041182	Tep2		protein_coding	1.877	5.427e-08	0.03525	0.8002	-0.04336	0.7826	0.006622	0.986	5.33	2.56	6.493	6.079	1.126	0.754	1.515	1.81	4.369	2.226	1.272	3.417	2.844	3.586	1.509	1.815	3.031	2.265	1.434	4.134
FBgn0034315	CG5721	ARMC6	protein_coding	0.6672	5.427e-08	0.09064	0.5125	0.1229	0.3882	0.1587	0.3155	92.536	70.722	92.071	88.389	47.319	44.561	61.18	56.02	55.043	56.755	45.127	62.219	63.653	56.983	64.67	67.569	52.638	55.699	64.613	62.403
FBgn0004456	mew		protein_coding	1.564	5.761e-08	-0.1501	0.2318	-0.5842	0.02395	-1.562	1.469e-05	40.936	27.24	35.428	45.555	13.049	11.506	11.864	11.188	14.279	16.577	19.3	10.862	10.269	9.169	9.268	7.757	7.324	8.951	5.453	1.69
FBgn0064225	RpL5	RPL5	protein_coding	-0.5684	5.875e-08	-0.09184	0.501	0.0001038	1	-0.1608	0.2501	523.429	604.194	544.695	534.231	840.412	773.724	871.017	886.638	780.664	749.465	989.328	664.906	626.749	917.939	737.456	873.203	909.117	709.519	721.031	748.312
FBgn0267385	PyK		protein_coding	-0.5443	5.95e-08	-0.1086	0.3914	-0.2229	0.06205	-0.2975	0.01432	97.106	125.451	108.754	99.27	158.314	153.741	169.394	165.037	164.448	131.02	129.266	117.86	129.965	118.678	109.669	106.273	122.616	102.701	85.979	138.67
FBgn0033359	CG8213		protein_coding	-2	6.273e-08	-0.2698	0.13	-0.3465	0.09667	-0.9516	0.008148	1.206	2.425	1.911	2.299	9.783	8.64	7.541	7.963	5.796	8.259	10.731	3.211	3.05	5.503	4.344	2.967	4.474	4.291	4.217	0.939
FBgn0034733	CG4752	OPLAH	protein_coding	-1.029	6.517e-08	-0.07617	0.5732	-0.1599	0.2651	-0.5848	0.003185	5.925	5.485	6.09	5.799	10.808	8.306	15.353	15.504	12.52	14.572	8.972	9.742	10.597	8.714	9.305	9.766	7.728	6.996	7.202	6.206
FBgn0034093	CG15706		protein_coding	0.7172	6.723e-08	0.1761	0.1285	0.07155	0.6641	0.2563	0.09557	17.311	13.524	20.354	19.321	9.931	9.327	11.038	11.033	12.518	11.321	8.487	14.098	15.919	12.737	13.167	10.894	11.952	14.543	11.531	15.457
FBgn0052364	tut		protein_coding	2.615	6.828e-08	2.061	0.001241	0.3046	0.1515	-0.08657	0.6461	1.384	0.815	1.374	1.02	0.188	0.177	0.039	0.246	0.228	0.528	0.295	3.839	1.106	0.891	0.693	0.824	1.13	0.509	0.25	0.117
FBgn0029911	CG14435	ZNRF2	protein_coding	0.5487	7.056e-08	-0.06978	0.6521	-0.1884	0.1413	-0.2891	0.02672	24.603	20.642	18.391	20.796	16.214	15.033	12.631	12.047	12.248	11.547	14.851	12.497	10.689	11.765	10.129	9.637	11.625	10.145	10.446	9.516
FBgn0039696	CG7837		protein_coding	0.6561	7.065e-08	0.09498	0.4854	-0.06459	0.6983	0.1273	0.4548	13.319	14.974	18.2	18.886	8.649	9.657	10.979	10.873	9.277	10.717	11.366	13.742	11.685	11.811	9.129	8.067	11.156	9.778	11.926	13.536
FBgn0261609	eIF2alpha	EIF2S1	protein_coding	-0.4443	7.196e-08	-0.293	0.001052	-0.3376	0.0004599	-0.3346	0.00103	136.152	116.861	122.55	115.562	169.689	143.664	183.434	185.684	195.055	184.663	167.163	129.426	144.23	138.587	129.877	147.781	130.214	128.101	135.426	152.65
FBgn0016983	smid	NVL	protein_coding	-0.3918	7.259e-08	-0.06552	0.6301	-0.05413	0.647	-0.2575	0.005549	106.669	123.54	140.392	137.784	153.031	172.763	177.402	175.524	170.893	167.83	165.876	149.648	157.352	161.247	166.439	154.11	154.59	138.127	139.081	134.96
FBgn0025642	CG32812		protein_coding	1.459	7.599e-08	0.04103	0.7637	-0.05846	0.7089	0.1581	0.412	11.16	7.067	7.501	7.225	3.523	2.548	2.266	2.944	1.905	4.018	1.928	2.566	4.057	3.061	1.785	1.969	2.409	4.423	3.863	2.743
FBgn0031148	Cbs	CBS,CBSL	protein_coding	-1.099	7.74e-08	-0.3662	0.03121	-0.4368	0.01895	-0.7063	0.001292	37.971	42.265	38.297	24.349	58.944	61.135	109.064	93.276	111.299	95.226	112.888	52.671	53.634	83.567	51.384	51.698	84.492	54.52	58.856	54.69
FBgn0038327	Trax	TSNAX	protein_coding	-0.3837	7.74e-08	-0.281	0.0006748	-0.2375	0.01277	-0.451	7.867e-07	57.428	50.778	59.601	56.781	78.959	69.902	72.854	75.862	71.946	72.895	84.548	56.539	61.122	59.701	54.61	63.477	67.999	51.366	57.311	53.689
FBgn0030511	CG11158		protein_coding	-3.386	7.935e-08	-0.001141	1	-0.1119	0.4231	-0.4516	0.07943	0.053	0.062	0.092	0.078	0.976	0.576	0.956	1.099	1.703	1.601	0.734	2.017	1.726	0.338	1.015	1.072	0.367	0.497	0.976	0.266
FBgn0259676	DNApol-alpha60	PRIM2	protein_coding	-0.7078	7.94e-08	0.01742	0.9565	0.0007198	1	0.005954	0.987	17.534	17.049	20.209	17.513	29.202	28.853	33.765	30.903	22.554	25.76	32.895	23.346	29.694	31.163	26.17	27.45	28.019	20.803	28.423	31.666
FBgn0032422	atilla		protein_coding	-3.614	8.505e-08	-0.1684	0.2887	-0.04678	0.7376	-1.747	0.00585	0.919	0.601	0.535	0.753	14.198	4.334	10.915	11.164	22.846	33.082	11.76	10	11.928	1.864	22.177	21.102	1.506	2.873	7.684	0.805
FBgn0030749	AnxB11		protein_coding	0.466	8.718e-08	0.03354	0.8724	-0.001542	0.9999	0.296	0.006141	173.492	144.857	157.202	152.821	112.826	122.031	102.723	106.562	106.402	101.054	88.739	105.086	102.614	102.071	96.573	95.528	103.046	119.858	115.089	141.569
FBgn0265523	Smr		protein_coding	0.7083	9.222e-08	0.01094	0.9755	0.06092	0.7156	0.04408	0.841	86.516	83.842	56.094	63.693	46.616	43.4	42.564	38.392	37.754	41.388	36.612	44.808	36.085	37.41	51.48	36.228	39.464	48.304	44.675	28.4
FBgn0029903	pod1	CORO7,CORO7-PAM16	protein_coding	0.4777	9.435e-08	0.109	0.3759	0.03775	0.7945	0.08776	0.5509	33.734	33.29	37.278	38.799	23.348	25.707	25.438	25.774	27.961	28.219	26.116	33.537	31.775	28.872	29.566	27.204	29.539	28.167	32.269	28.257
FBgn0265718	CR44525		ncRNA	5.494	9.634e-08	1.125	0.04885	0.2936	0.2078	0.4681	0.1167	1.822	2.311	1.305	2.222	0.027	0.051	0.033	0	0	0	0	0.254	0.286	0.384	0	0.101	0.243	0.219	0.323	0
FBgn0010470	Fkbp14		protein_coding	-1.518	9.862e-08	-0.04778	0.72	-0.2317	0.145	-0.4966	0.02771	6.906	4.875	10.157	7.778	14.938	12.29	34.749	28.379	44.261	45.78	22.536	29.515	34.895	24.824	21.558	23.383	21.912	22.035	24.993	12.383
FBgn0035945	CG5026		protein_coding	0.3323	9.884e-08	0.2263	0.003425	0.0414	0.7151	0.1492	0.1201	34.003	32.606	33.36	33.927	26.683	26.485	26.394	25.483	29.075	29.363	25.82	37.05	35.948	30.538	29.75	29.786	28.554	31.128	29.937	32.828
FBgn0037680	pasi2		protein_coding	0.5933	9.975e-08	0.1031	0.4326	0.0001231	1	0.2817	0.0516	12.859	13.712	11.962	12.607	9.038	8.502	7.777	7.453	6.881	6.682	9.929	10.514	8.404	9.825	7.158	6.97	9.423	11.574	10.25	10.131
FBgn0051146	Nlg1		protein_coding	1.887	1.005e-07	-0.003247	0.9937	0.06238	0.6688	0.2223	0.2493	4.536	5.085	2.731	2.477	1.116	1.492	0.458	0.65	0.773	0.567	0.547	0.489	0.481	0.828	1.177	0.738	0.652	0.975	1.023	1.129
FBgn0262475	bru2		protein_coding	1.867	1.048e-07	0.02735	0.8611	0.246	0.1515	0.473	0.05033	12.6	8.762	8.389	8.189	2.329	5.47	0.956	0.906	2.423	2.882	3.581	3.649	2.847	4.258	6.842	5.533	4.556	7.643	7.274	3.667
FBgn0004168	5-HT1A		protein_coding	-4.274	1.077e-07	-0.0505	0.6695	-0.2377	0.2227	-0.9424	0.03518	0	0.02	0.03	0.05	0.88	0.431	0.548	0.667	0.546	0.366	0.542	0.554	0.115	0.124	0.289	0.123	0.074	0.159	0.13	0.024
FBgn0037469	Dpck	DCAKD	protein_coding	-0.8343	1.105e-07	-0.02059	0.9394	-0.2964	0.0427	-0.01736	0.9476	13.321	13.496	16.588	16.417	26.662	20.722	31.428	32.977	30.619	25.659	26.18	25.345	28.982	23.976	16.069	18.986	20.283	16.892	25.469	35.345
FBgn0264326	DNApol-epsilon255	POLE	protein_coding	-0.4996	1.12e-07	0.01185	0.9718	-0.06712	0.6336	-0.2334	0.0554	15.763	17.981	18.187	17.087	23.517	25.208	25.613	25.97	20.309	21.606	22.005	19.933	21.635	23.418	20.121	16.262	22.42	15.935	17.357	18.778
FBgn0036341	Syx13		protein_coding	0.5614	1.127e-07	0.03572	0.8702	0.1167	0.4057	-0.05174	0.7974	30.752	23.892	27.222	27.587	18.972	15.921	17.659	19.224	21.366	17.041	17.277	15.444	24.223	18.833	20.479	22.297	21.202	17.694	15.462	19.183
FBgn0037901	CG6744	EXD2	protein_coding	0.6722	1.173e-07	0.111	0.3846	0.1926	0.1529	0.5808	7.928e-05	57.987	44.916	52.322	51.4	31.669	28.818	32.292	32.134	28.931	26.452	28.8	37.439	31.785	32.888	34.458	39.506	33.269	34.043	35.599	65.522
FBgn0032744	Ttc19		protein_coding	-1.11	1.177e-07	0.05119	0.7307	0.09256	0.5501	0.261	0.1466	8.928	9.89	6.572	6.322	23.624	24.053	11.014	13.366	13.563	11.943	14.05	15.765	15.825	15.434	14.859	18.033	16.054	15.528	15.802	24.215
FBgn0053107	CG33107		protein_coding	-0.6811	1.181e-07	-0.1989	0.08352	-0.2429	0.07045	-0.5489	0.0003409	21.625	23.263	17.414	19.888	40.344	36.051	30.183	29.973	29.242	30.34	35.468	23.158	19.297	27.748	20.733	25.029	24.851	17.214	15.811	24.553
FBgn0264975	Nrg		protein_coding	0.9114	1.21e-07	0.0277	0.9038	0.03449	0.8566	-0.03011	0.9052	125.913	91.516	121.14	118.703	58.408	50.878	61.212	61.306	63.626	78.336	63.704	81.245	71.956	68.057	80.527	73.514	66.223	81.555	74.977	41.747
FBgn0040087	p115	USO1	protein_coding	0.3515	1.21e-07	0.1789	0.04293	0.238	0.00758	0.1275	0.2259	41.551	45.149	46.084	45.141	30.788	32.17	38.067	36.778	31.732	31.712	32.776	39.796	39.144	35.587	42.009	36.618	39.162	36.319	37.188	33.576
FBgn0053329	Sp212		protein_coding	-3.172	1.214e-07	0.03301	0.7906	-0.01619	0.922	-0.05884	0.7715	0.203	0.358	0.442	0.336	4.495	4.099	2.696	3.021	3.188	2.517	2.658	2.94	2.684	6.657	0.647	0.879	5.536	0.95	3.345	1.962
FBgn0028397	Tob		protein_coding	1.573	1.249e-07	0.1465	0.2431	0.02451	0.8943	0.06755	0.7671	5.126	4.068	2.591	2.482	0.935	2.334	0.63	0.595	1.333	1.432	2.286	3.456	2.279	2.807	1.169	1.781	2.569	1.716	2.004	2.117
FBgn0030791	CG9132	NECAP1,NECAP2	protein_coding	0.4715	1.301e-07	0.03313	0.8764	0.02552	0.8717	-0.1068	0.4466	47.764	46.859	60.407	62.897	38.902	38.186	39.309	37.017	44.696	48.579	59.05	54.309	51.499	54.201	49.969	55.733	52.161	45.932	48.797	44.64
FBgn0035519	CG1309		protein_coding	0.3186	1.362e-07	0.06257	0.6352	0.1892	0.04235	0.1618	0.09386	39.206	37.602	38.754	39.75	31.461	29.335	29.272	33.061	30.813	26.369	27.042	33.147	28.249	28.885	36.675	31.711	30.871	34.795	31.797	30.058
FBgn0032369	CG6614		protein_coding	1.598	1.387e-07	0.02642	0.8701	0.5495	0.03866	0.1894	0.3179	2.645	2.789	2.872	2.836	1.349	0.855	0.465	0.778	0.373	0.864	0.63	0.726	0.695	0.832	1.61	1.478	1.138	0.904	1.229	0.781
FBgn0036760	CG5567		protein_coding	-0.5658	1.391e-07	0.03922	0.8518	0.08846	0.5461	-0.008711	0.9743	9.916	11.29	11.233	12.722	19.073	16.744	17.936	15.458	17.567	15.566	18.857	14.389	19.488	21.056	18.583	19.492	20.3	14.26	18.378	18.017
FBgn0039882	CG11576	SLC52A3,SLC52A1,SLC52A2	protein_coding	-0.438	1.391e-07	-0.269	0.005198	-0.2442	0.02812	-0.2403	0.03981	9.864	9.62	10.608	11.783	13.657	15.764	14.267	14.291	15.065	16.962	14.063	10.663	12.543	11.379	11.848	11.805	12.595	10.115	12.908	13.272
FBgn0033259	CG11210		protein_coding	0.4639	1.4e-07	0.1456	0.1949	0.2737	0.0129	0.37	0.001081	21.353	21.613	26.081	27.543	15.607	18.81	16.689	17.302	15.265	15.451	15.317	19.042	17.414	18.538	20.774	18.785	20.097	23.616	20.19	19.453
FBgn0052183	Ccn		protein_coding	1.256	1.404e-07	1.462	3.206e-06	1.626	1.045e-07	0.8293	0.001951	15.355	13.159	8.65	10.893	4.981	5.505	4.369	4.133	3.429	4.238	4.418	12.508	12.825	9.874	11.749	17.233	10.422	12.457	8.662	5.144
FBgn0035207	Sherpa		protein_coding	0.4755	1.404e-07	0.1336	0.2449	0.04545	0.7567	0.2482	0.03253	45.625	39.972	47.894	45.069	28.139	32.13	32.103	32.849	34.872	34.941	28.065	41.358	39.061	34.528	38.109	30.326	35.129	41.716	38.909	39.921
FBgn0032210	CYLD		protein_coding	-0.6477	1.462e-07	0.01794	0.9559	-0.003421	0.993	0.0934	0.6114	7.787	8.85	9.147	8.532	13.182	16.267	13.694	12.724	12.061	11.398	15.471	13.728	12.408	14.379	10.539	14.569	13.572	13.878	12.016	16.781
FBgn0037834	Art1	PRMT8	protein_coding	-0.4132	1.477e-07	-0.1434	0.1721	-0.2222	0.02929	-0.2743	0.006141	97.347	104.03	104.674	97.378	126.367	123.386	151.692	146.897	167.408	158.838	131.867	124.823	138.763	128.769	121.873	123.151	130.124	115.849	116.227	133.447
FBgn0030054	Caf1-180		protein_coding	-0.6742	1.494e-07	-0.02106	0.9401	-0.04377	0.7973	-0.2401	0.1063	34.432	31.801	33.653	31.15	54.919	54.588	52.216	55.363	42.504	42.447	53.851	40.452	40.513	52.338	39.467	39.694	50.494	38.187	31.441	40.194
FBgn0264556	Gr39a		protein_coding	1.214	1.501e-07	0.7683	0.006629	0.3015	0.07463	0.8319	0.001651	6.844	4.676	6.182	6.366	2.681	2.54	2.21	2.359	2.19	2.053	2.806	5.76	4.011	4.695	3.572	4.687	3.647	4.055	4.569	6.128
FBgn0004400	rhi		protein_coding	-1.482	1.538e-07	-0.06631	0.5733	-0.007382	0.9753	-0.2077	0.2748	0.597	1.15	1.799	1.839	3.021	2.696	4.999	5.602	1.972	2.343	2.159	1.18	1.989	1.386	0.808	2.273	2.87	0.848	0.833	2.1
FBgn0052412	QC	QPCTL,QPCT	protein_coding	0.7258	1.538e-07	0.04167	0.8349	0.1005	0.5127	-0.01836	0.9427	77.309	73.964	70.088	78.574	45.009	31.412	50.812	47.027	43.001	39.093	44.328	39.117	46.533	51.897	50.536	44.87	52.174	39.894	43.669	40.302
FBgn0030053	CG12081		protein_coding	0.4315	1.599e-07	0.06677	0.655	0.2261	0.04125	0.4238	6.298e-05	31.864	29.719	29.214	29.09	20.536	19.649	23.298	23.498	22.496	18.637	21.596	20.288	23.264	24.452	25.112	26.193	26.099	27.92	28.566	30.876
FBgn0002638	Rcc1		protein_coding	-0.4428	1.599e-07	-0.03675	0.8518	0.04361	0.7551	-0.01824	0.9244	49.97	51.205	49.695	46.456	68.007	66.902	69.164	70.306	63.396	61.753	67.742	58.445	59.426	65.683	65.937	72.073	65.677	65.732	56.735	67.575
FBgn0010246	Myo61F		protein_coding	1.604	1.647e-07	0.03022	0.8522	-0.06146	0.6952	-0.03272	0.8973	71.107	38.176	82.284	75.958	15.739	13.132	25.574	28.158	27.882	25.556	11.127	31.005	30.564	14.972	17.835	17.768	15.818	21.605	24.965	13.588
FBgn0265998	Doa		protein_coding	0.5325	1.669e-07	0.1745	0.1088	0.2547	0.03064	0.2379	0.06128	31.615	37.085	33.686	35.493	22.706	26.588	20.989	22.233	21.42	22.281	18.848	28.152	25.996	23.669	30.381	24.347	25.903	27.618	28.346	21.256
FBgn0033266	Socs44A		protein_coding	0.5748	1.678e-07	0.1656	0.1441	0.1621	0.2201	0.2335	0.0946	43.544	33.412	37.969	41.934	27.288	23.358	24.341	26.802	20.905	22.492	27.237	29.377	30.427	29.774	24.637	30.767	30.226	32.406	34.684	22.436
FBgn0037092	M6		protein_coding	0.6705	1.717e-07	0.1412	0.2371	0.2967	0.02587	0.3191	0.02843	22.418	22.626	24.916	25.925	14.183	15.987	13.61	14.225	14.857	17.176	18.846	23.05	18.283	23.167	22.275	21.854	26.938	27.913	25.124	17.318
FBgn0029590	CG14811		protein_coding	4.229	1.778e-07	-0.02193	0.8826	-0.03391	0.8089	0.03384	0.8711	4.413	3.189	1.984	4.215	0.27	0.036	0.191	0.087	0.982	0.867	0.242	0	0.817	0.458	1.068	0.435	0	0.314	1.848	0.36
FBgn0032402	CG14945		protein_coding	-2.055	1.816e-07	-0.5336	0.05404	-1.23	0.006402	-1.817	0.0001314	2.603	3.106	3.269	3.813	16.197	11.21	15.314	15.322	22.514	20.939	43.459	11.431	10.004	13.472	8.315	8.564	11.438	7.495	5.103	8.77
FBgn0250816	AGO3	PIWIL2	protein_coding	1.114	1.906e-07	-0.05838	0.6739	-0.08831	0.5646	0.6762	0.002774	2.997	3.057	2.009	1.381	1.079	0.893	0.966	1.18	2.058	1.879	2.324	1.699	1.272	2.051	1.311	2.089	1.578	3.764	3	5.067
FBgn0003969	vap	RASA1	protein_coding	0.4285	1.974e-07	0.1475	0.1666	0.0411	0.7664	0.1678	0.1463	59.927	54.521	63.311	62.43	38.288	48.193	43.063	45.093	43.819	43.622	40.842	48.684	54.554	47.581	42.84	44.457	47.345	50.945	50.82	45.928
FBgn0031227	CG3709	PUS10	protein_coding	-0.7417	1.987e-07	-0.03912	0.8503	-0.01125	0.962	-0.01991	0.9396	7.617	7.969	9.099	8.684	13.092	16.094	14.026	15.076	16.892	14.724	10.941	12.271	14.297	12.121	13.661	15.139	12.607	13.317	14.548	13.299
FBgn0037374	jagn	JAGN1	protein_coding	0.3501	2.019e-07	0.06322	0.6393	0.07963	0.4685	0.07614	0.5369	58.811	52.243	55.317	55.244	44.85	42.364	42.274	41.712	50.986	49.135	48.36	58.815	48.682	52.214	57.29	53.661	50.703	55.369	51.232	51.81
FBgn0267487	Ptp61F		protein_coding	0.3564	2.029e-07	0.1149	0.2808	0.1328	0.1977	0.1785	0.06639	33.979	29.877	29.856	31.179	24.308	25.74	22.799	23.183	23.233	24.17	22.887	27.152	24.549	27.273	27.368	25.673	26.287	27.808	27.366	25.971
FBgn0038395	CG10407		protein_coding	-1.827	2.037e-07	-1.101	0.008062	-0.2332	0.1622	-1.749	7.433e-05	5.449	6.062	3.876	5.134	25.907	22.356	14.421	15.67	19.583	22.563	19.307	7.962	6.375	7.875	10.315	12.799	9.782	4.732	4.301	6.948
FBgn0019968	Khc-73		protein_coding	0.6635	2.039e-07	0.2173	0.05437	0.1744	0.1995	0.6201	2.488e-05	42.558	42.418	44.948	45.871	22.128	32.372	24.957	27.39	22.372	23.32	20.765	31.874	30.503	27.884	31.95	22.423	28.515	39.594	39.959	31.123
FBgn0262593	Shab		protein_coding	1.774	2.061e-07	0.05871	0.6178	0.1469	0.3075	1.3	0.001545	0.899	0.596	0.694	0.586	0.173	0.174	0.207	0.201	0.178	0.34	0.258	0.394	0.479	0.274	0.479	0.553	0.299	0.68	0.979	0.667
FBgn0265178	CG44243	LIPT1	protein_coding	0.5729	2.071e-07	-0.01582	0.9605	0.05316	0.7407	-0.009535	0.9715	76.475	72.979	84.112	89.658	56.067	54.712	50.555	48.873	59.492	57.5	58.535	62.564	57.035	51.582	66.858	64.841	57.507	65.394	62.952	46.648
FBgn0053217	CG33217		protein_coding	-0.7434	2.071e-07	-0.05898	0.7155	-0.2258	0.1002	-0.2784	0.07328	10.667	9.637	12.37	12.207	18.507	22.379	18.839	18.641	30.266	27.669	23.726	27.046	25.14	20.204	22.228	17.96	20.596	22.232	21.845	17.605
FBgn0259713	CG42367		protein_coding	1.386	2.096e-07	2.382	8.173e-12	1.943	6.426e-08	2.413	1.925e-12	16.507	13.611	14.662	13.71	4.139	3.153	6.358	7.511	5.347	3.754	5.24	30.257	31.397	18.079	14.802	24.865	19.143	31.508	24.287	26.795
FBgn0003942	RpS27A		protein_coding	-0.5485	2.103e-07	-0.06966	0.6521	0.09077	0.5239	0.07304	0.6729	2434.94	2307.67	2174.1	2196	3766.77	3098.58	3410.45	3478.21	3067.5	3024.86	4247.65	2681.26	3015.13	3622.53	3577.82	4246.75	3749.62	3676.77	3872.73	3513.79
FBgn0036754	CG5589	DDX52	protein_coding	-0.6312	2.177e-07	-0.07732	0.6029	-0.2046	0.1276	-0.2569	0.0819	8.99	10.399	9.924	10.048	16.541	16.926	14.884	14.986	16.521	16.722	12.643	10.603	15.774	13.172	13.909	11.246	10.736	12.856	11.146	11.739
FBgn0025186	ari-2	ARIH2	protein_coding	0.5285	2.192e-07	0.1439	0.2169	0.01028	0.9616	0.2699	0.03606	22.22	21.171	23.539	24.295	15.714	15.099	15.01	15.538	18.568	16.419	14.442	22.488	20.151	17.361	16.638	17.061	16.23	23.717	20.564	18.881
FBgn0050085	Rif1		protein_coding	-0.6174	2.227e-07	0.008487	0.9821	-0.02263	0.9053	-0.1285	0.4291	27.956	32.297	38.272	33.375	46.313	47.838	58.372	57.366	48.281	53.963	51.382	51.077	50.615	54.27	50.165	43.669	54.613	44.914	42.627	47.966
FBgn0266709	Zmynd10	ZMYND10	protein_coding	3.046	2.256e-07	0.05054	0.6686	-0.0462	0.7413	-0.02583	0.9043	1.82	1.775	1.324	1.636	0.175	0.124	0.135	0.246	0.08	0.614	0.309	1.135	0.232	0.571	0	0.329	0.247	0.356	0.262	0.286
FBgn0050287	CG30287		protein_coding	6.32	2.265e-07	0.07385	0.6045	0	1	0.3959	0.1457	5.528	2.205	1.764	1.841	0	0.032	0	0.039	0	0	0	0.323	0	0	0	0	0	0	0.274	0.192
FBgn0036787	CG4306	GGCT	protein_coding	3.113	2.292e-07	0.1375	0.337	0.03537	0.7987	3.088	1.717e-05	10.591	3.021	3.082	2.868	0.381	0.18	0.472	0.894	1.042	1.966	0.299	3.302	3.934	1.208	0.881	1.555	1.938	15.263	15.759	4.926
FBgn0033273	Gasz		protein_coding	0.4184	2.334e-07	0.2143	0.02751	0.2771	0.008102	0.3122	0.004153	28.337	27.438	28.384	28.857	20.521	22.509	19.741	19.964	18.724	18.991	21.368	25.578	23.583	25.618	25.374	28.768	22.762	20.369	27.211	27.429
FBgn0036187	RIOK1	RIOK1	protein_coding	-0.8121	2.347e-07	-0.1297	0.2834	-0.07702	0.6382	0.007079	0.9847	20.433	22.011	18.291	18.204	44.2	45.246	26.991	28.578	30.6	30.483	24.718	24.465	22.851	18.466	25.305	28.664	20.963	32.003	29.349	25.452
FBgn0036155	CG6163		protein_coding	0.6942	2.449e-07	-0.03414	0.8768	-0.06351	0.7083	-0.05708	0.7924	37.05	30.856	29.484	28.439	21.084	19.058	16.484	17.964	18.865	23.265	16.498	19.419	18.095	17.081	17.863	18.643	16.381	18.449	24.019	13.06
FBgn0000568	Eip75B		protein_coding	1.272	2.454e-07	0.01052	0.9709	0.05648	0.7364	0.1848	0.3274	9.584	11.199	11.055	12.444	4.076	7.079	3.008	3.116	3.506	3.371	5.31	3.904	3.208	5.644	4.786	3.824	5.749	5.779	4.395	6.297
FBgn0038585	Non3	RPF2	protein_coding	-0.6575	2.471e-07	-0.08912	0.525	-0.09388	0.5386	-0.2559	0.08536	45.805	40.786	36.719	36.13	71.077	58.656	66.036	65.187	61.232	69.586	48.342	50.16	58.419	44.151	64.202	51.345	41.761	46.029	47.262	45.703
FBgn0259740	CG42394		protein_coding	1.249	2.544e-07	-0.04724	0.7436	-0.1867	0.2013	-0.7544	0.003263	111.197	70.788	43.531	52.781	27.912	20.761	34.077	27.457	64.615	58.459	71.03	54.321	53.093	53.073	29.172	42.512	55.802	29.81	36.923	27.837
FBgn0085192	CG34163		protein_coding	-0.5978	2.648e-07	-0.01748	0.9565	0.02661	0.887	-0.2514	0.08365	16.209	16.785	20.421	17.469	32.026	28.635	25.731	25.177	33.384	30.784	40.499	29.724	37.509	34.79	31.865	40.423	37.084	27.287	25.171	29.768
FBgn0086130	Dbp21E2	DDX28	protein_coding	-0.5121	2.68e-07	-0.1795	0.104	-0.306	0.01134	-0.518	7.578e-05	9.291	10.452	10.385	10.15	15.505	13.825	15.347	14.704	15.264	13.328	14.735	12.216	9.417	12.473	9.841	11.938	10.021	5.994	9.287	11.001
FBgn0262026	CG42837		protein_coding	0.5677	2.694e-07	-0.01625	0.9596	0.05465	0.7343	-0.005941	0.9855	81.628	78.382	90.401	96.516	60.309	58.909	54.527	52.622	64.098	62.017	62.698	67.036	61.338	55.611	72.411	69.36	62.145	70.826	67.813	50.264
FBgn0032089	Rcd-1r	CNOT9	protein_coding	3.093	2.768e-07	-0.03469	0.7789	-0.1866	0.2962	-0.2962	0.2068	3.596	1.694	1.967	1.591	0.221	0.078	0.342	0.249	1.408	0.233	0.087	0.652	0	0.328	0.153	0.104	0.187	0	0.221	0.155
FBgn0027598	cindr		protein_coding	0.8531	2.813e-07	0.05453	0.7318	0.1324	0.3666	0.2429	0.149	43.248	27.697	28.515	26.341	16.846	17.748	15.751	15.954	16.783	14.697	16.918	15.503	15.78	24.053	16.88	17.977	25.65	18.328	19.917	25.465
FBgn0011576	Cyp4d2		protein_coding	0.9768	2.828e-07	-0.002818	0.9995	0.1973	0.1707	0.02701	0.9187	18.672	18.761	17.313	17.331	8.725	9.255	8.265	8.458	5.406	6.375	9.866	6.824	5.861	8.883	9.629	10.227	11.257	7.877	8.111	6.882
FBgn0034284	CG14491		protein_coding	5.906	2.837e-07	3.729	0.003002	1.508	0.02777	0.6532	0.07504	4.249	3.103	3.264	4.01	0	0	0.081	0.073	0	0	0	2.158	1.385	1.241	0.724	0.983	0.59	0.531	0.783	0.122
FBgn0002521	pho	YY1	protein_coding	-0.6553	2.839e-07	0.01545	0.9628	0.03504	0.8423	-0.003169	0.9966	25.997	30.411	27.781	32.169	47.067	57.265	43.959	42.243	49.765	52.184	59.005	57.663	54.023	54.308	55.746	62.801	51.68	63.613	54.925	43.063
FBgn0024558	Dph5	DPH5	protein_coding	-0.6685	2.86e-07	-0.1867	0.1028	-0.194	0.1515	-0.3197	0.02814	54.875	57.524	52.447	46.085	89.866	79.379	94.797	84.731	97.972	92.784	83.852	67.224	66.246	72.749	64.461	74.737	75.169	55.692	62.026	82.182
FBgn0264089	sli		protein_coding	-1.188	2.868e-07	0.04051	0.8065	0.03438	0.8502	0.3543	0.05983	7.702	9.473	11.457	13.023	21.735	30.675	23.241	24.99	24.664	27.08	13.598	30.508	28.407	17.314	31.164	23.621	16.979	37.197	40.751	26.312
FBgn0265309	CR44282		ncRNA	6.184	2.881e-07	0	1	0.6102	0.09558	2.645	0.005214	0.714	1.935	1.247	0.948	0	0.026	0	0	0	0	0	0	0	0	0	0.103	0.434	0.893	0.329	0.41
FBgn0037856	Leash		protein_coding	0.9079	2.891e-07	0.03252	0.8769	-0.005719	0.9858	0.03377	0.8936	56.522	45.635	76.332	76.879	29.82	33.841	33.104	32.578	42.055	44.538	31.471	50.605	44.487	34.04	40.941	42.842	32.888	42.524	47.211	33.645
FBgn0045759	bin		protein_coding	-1.103	2.896e-07	-0.2714	0.06814	-0.3947	0.03138	-1.226	8.453e-06	12.355	20.582	21.939	25.014	48.076	38.045	47.084	48.673	30.66	30.427	29.294	18.248	20.862	15.883	21.801	18.675	12.83	16.444	11.007	9.646
FBgn0052264	CG32264		protein_coding	-0.5934	2.964e-07	-0.4622	0.0005338	-0.3111	0.01239	-0.3245	0.01568	17.754	15.884	13.343	14.089	26.279	27.014	19.713	22.384	15.753	16.143	20.294	10.453	10.195	13.818	12.51	12.34	13.019	12.771	13.688	12.5
FBgn0262534	CG43088		protein_coding	3.32	2.965e-07	0.02555	0.8536	-0.2339	0.2571	0.1368	0.4643	1.221	0.846	1.129	0.689	0.083	0.052	0.068	0.124	0.603	0.155	0.043	0.521	0.098	0.393	0	0	0.062	0.674	0.331	0.412
FBgn0037921	CG6808		protein_coding	-1.021	2.968e-07	-0.06133	0.6645	-0.07684	0.6329	-0.0906	0.6755	1.085	1.438	0.837	0.78	2.335	2.895	1.805	1.841	1.594	2.257	2.258	1.329	2.138	1.56	1.734	1.765	1.671	1.357	1.542	2.219
FBgn0000320	eya	EYA4,EYA3,EYA1,EYA2	protein_coding	1.641	2.97e-07	0.006779	0.9805	0.04359	0.7866	0.1583	0.41	27.851	32.288	33.838	33.467	8.067	13.439	9.331	7.311	29.304	30.332	12.455	31.306	30.47	13.394	37.051	35.153	13.611	39.46	42.104	19.313
FBgn0052512	CG32512		protein_coding	-1.317	2.971e-07	-0.3508	0.05486	-0.375	0.05007	-1.273	6.642e-05	33.113	27.503	33.164	35.686	78.207	30.244	120.326	114.004	75.385	68.894	38.896	34.929	37.466	27.866	37.466	36.867	27.811	20.386	27.074	22.41
FBgn0030089	AP-1gamma	AP1G1,AP1G2	protein_coding	0.3005	2.996e-07	0.163	0.04422	0.198	0.01507	0.2865	0.0001368	41.573	40.311	38.425	40.465	31.538	37.007	29.823	30.784	31.781	32.156	32.162	36.973	39.119	35.144	40.573	37.792	34.773	37.578	40.468	40.805
FBgn0029770	CG4151		protein_coding	5.003	3.029e-07	0.4224	0.1531	0.714	0.07771	1.375	0.02221	5.472	4.374	3.033	3.026	0.05	0.095	0.093	0.113	0	0	0.039	0	0.885	0.178	1.11	0.188	0.113	0.815	1.101	0
FBgn0050413	CG30413		protein_coding	4.71	3.029e-07	0.05537	0.6521	0.1957	0.2868	0.2183	0.2946	6.313	7.436	7.63	8.474	0.187	0.294	0	0.35	6.339	6.12	0.195	11.451	12.095	5.171	11.721	25.503	7.442	16.7	20.139	0.813
FBgn0036463	Reck	RECK	protein_coding	3.241	3.075e-07	0.04618	0.6919	-0.004704	0.9839	0.08648	0.6499	0.778	0.341	0.151	0.147	0.015	0.036	0.047	0.026	0.251	0.151	0.072	0.217	0.434	0.127	0.127	0.202	0.104	0.312	0.214	0.186
FBgn0030766	mthl1		protein_coding	-0.7498	3.193e-07	-0.1537	0.1924	-0.1379	0.3381	-0.2385	0.1351	14.456	16.879	18.258	18.527	30.259	33.061	27.747	28.686	30.387	28.479	34.408	23.061	19.935	27.671	26.22	19.273	30.34	31.526	20.428	21.037
FBgn0085484	Pdxk	PDXK	protein_coding	-0.982	3.305e-07	-0.1296	0.2737	-0.2079	0.1524	-0.3274	0.06772	3.802	8.326	4.363	5.015	12.282	11.543	10.484	10.902	10.486	9.949	9.01	6.993	6.038	7.82	6.272	6.27	7.525	4.855	4.277	9.448
FBgn0037756	CG8507	LRPAP1	protein_coding	-0.349	3.305e-07	-0.197	0.0199	-0.1805	0.06012	-0.1886	0.04609	105.199	110.833	110.302	111.003	143.462	127.451	143.855	150.667	150.063	140.079	143.102	116.274	121.106	122.122	118.438	124.582	127.546	115.208	116.698	138.683
FBgn0083123	Uhg5		ncRNA	-0.8976	3.313e-07	-0.02659	0.9065	-0.05676	0.7469	-0.03262	0.8978	29.927	22.59	27.043	28.205	71.493	58.62	39.557	41.13	33.751	36.082	51.349	36.698	35.361	40.874	30.969	41.125	36.107	37.227	35.77	43.231
FBgn0002780	mod		protein_coding	-0.8248	3.44e-07	-0.1271	0.2959	-0.2737	0.05593	-0.4672	0.005014	177.845	177.666	197.586	185.766	309.168	302.662	381.089	380.126	522.223	488.233	302.256	349.864	368.163	287.934	307.787	329.819	272.993	297.85	294.492	239.573
FBgn0012036	Aldh	AC002996.1,ALDH2	protein_coding	-0.6565	3.539e-07	-0.06965	0.6528	-0.06594	0.6901	-0.703	3.26e-06	234.577	279.526	303.656	288.768	481.079	357.914	496.346	479.126	371.298	402.04	522.544	348.416	398.934	394.927	383.676	385.56	405.192	258.861	246.771	238.195
FBgn0034988	cN-IIIB	NT5C3A,NT5C3B	protein_coding	-0.5296	3.541e-07	-0.02365	0.9295	-0.1363	0.3119	-0.176	0.224	11.631	12.946	14.282	12.926	18.963	17.67	20.15	20.71	20.081	20.137	17.989	17.463	21.471	16.913	13.155	18.662	16.848	12.179	14.531	20.236
FBgn0000543	ecd	ECD	protein_coding	0.4728	3.573e-07	0.07097	0.637	0.1549	0.2105	0.1666	0.2066	69.305	56.333	62.902	63.437	46.364	41.537	45.304	43.432	38.903	33.382	37.207	39.59	43.771	37.479	46.73	39.59	42.761	32.851	46.104	46.078
FBgn0037330	mRpL44	MRPL44	protein_coding	-0.5382	3.609e-07	-0.05162	0.7637	-0.1997	0.1162	-0.2536	0.05652	35.439	35.083	32.767	30.832	48.249	40.37	58.668	53.892	59.544	56.476	48.466	52.993	54.332	44.326	44.766	51.115	36.732	44.84	42.543	43.27
FBgn0050419	CG30419		protein_coding	6.264	3.717e-07	0.0413	0.7385	0.1498	0.3671	1.044	0.0331	0.491	0.46	0.351	0.379	0	0	0	0.01	0.062	0.265	0	0.324	0.243	0.102	0.285	0.581	0.194	0.978	1.132	0.24
FBgn0026533	Dek		protein_coding	-0.4742	3.752e-07	-0.1305	0.2597	-0.1064	0.4111	-0.2567	0.02741	102.551	118.915	107.802	110.059	156.501	178.035	143.765	148.749	128.124	136.841	161.095	110.995	117.099	134.911	124.054	119.144	135.332	119.844	114.122	109.415
FBgn0011638	La	SSB	protein_coding	-0.4929	3.779e-07	-0.1139	0.3593	-0.07463	0.5953	0.1312	0.345	227.343	233.145	197.265	188.914	319.522	349.422	276.103	280.854	300.293	263.971	225.783	214.657	239.636	226.204	244.539	263.858	212.71	286.985	290.26	308.613
FBgn0260971	CG42594		protein_coding	4.372	3.86e-07	0.0004947	1	0.2053	0.2831	0.955	0.03982	1.03	0.372	0.29	0.135	0.019	0.024	0.016	0.007	0.07	0.018	0.01	0.03	0.045	0.015	0.106	0.192	0.072	0.415	0.255	0.048
FBgn0035488	CG11593		protein_coding	0.3511	3.899e-07	0.1483	0.1365	0.115	0.2947	0.3033	0.001155	30.582	26.962	30.09	29.342	23.639	20.457	22.133	24.062	19.755	23.813	20.888	24.171	25.154	25.529	26.091	21.88	24.345	27.358	26.127	28.189
FBgn0032163	TbCMF46		protein_coding	4.426	3.93e-07	2.303	0.01405	2.038	0.01507	1.89	0.01179	0.966	1.308	1.068	0.961	0.037	0.088	0	0.021	0.068	0	0.029	1.139	0.459	0.573	1.44	0.14	0.419	0.453	0.668	0.589
FBgn0034837	RpL22-like		protein_coding	2.561	3.93e-07	0.04264	0.7131	0.03398	0.8101	0.01684	0.9427	4.354	2.931	1.166	0.917	0.478	0.301	0.361	0.239	0.773	0.97	0.5	0.877	1.502	1.072	1.325	0.999	0.659	0.216	0.743	1.14
FBgn0036348	CG17687		protein_coding	3.126	4.051e-07	0.1535	0.3323	0.2032	0.2728	2.451	0.002227	1.362	1.136	0.937	1.448	0.197	0.135	0.084	0.054	0.025	0.038	0.064	0.16	0.072	0.226	0	0.23	0.2	0.553	0.516	0.305
FBgn0038755	Hs6st	HS6ST3,HS6ST2,HS6ST1	protein_coding	-0.6306	4.07e-07	-0.1137	0.3721	-0.1352	0.3358	-0.4514	0.001554	8.322	10.741	12.259	14.521	18.17	20.91	17.306	17.546	20.859	25.069	20.987	19.579	19.329	16.62	19.478	19.651	16.988	17.088	16.284	11.997
FBgn0285937	Rab1	RAB1A	protein_coding	0.3392	4.114e-07	0.1084	0.3033	0.04463	0.6951	0.07503	0.5184	253.449	206.916	235.382	245.944	187.957	188.38	178.07	179.504	192.889	183.427	188.09	226.605	200.12	202.629	188.965	205.685	198.405	200.086	192.759	205.716
FBgn0035959	CG4911		protein_coding	0.6471	4.118e-07	0.08623	0.541	0.1037	0.4854	0.03762	0.8674	29.849	28.05	30.901	34.658	19.578	20.809	17.641	17.75	22.92	23.055	20.841	31.243	24.443	22.328	28.177	26.47	22.815	27.372	24.731	17.828
FBgn0031971	Sirup	SDHAF4	protein_coding	-1.934	4.211e-07	-0.1784	0.2168	0.01611	0.9313	-0.2124	0.2684	171.576	282.038	244.333	297.244	1412.84	395.202	1126.6	1207.19	177.893	244.279	423.364	88.584	104.854	233.768	278.848	408.315	232.246	182.709	182.405	145.32
FBgn0267746	CR46077		ncRNA	4.642	4.211e-07	5.505	3.852e-05	5.486	2.509e-05	4.112	0.0006663	6.94	5.502	2.796	2.952	0.41	0.097	0	0	0	0	0	10.651	3.989	4.385	13.074	5.015	2.315	5.007	3.69	0.766
FBgn0034073	CG8414		protein_coding	-0.6276	4.319e-07	0.0232	0.9307	-0.2872	0.02865	-0.3469	0.01498	9.702	10.211	11.339	10.941	15.462	19.487	16.529	16.328	21.21	18.259	15.472	20.555	19.79	16.941	13.717	11.431	14.498	12.49	13.483	13.43
FBgn0031220	CG4822		protein_coding	3.533	4.345e-07	0.04762	0.6839	0.04009	0.7774	0.1617	0.3921	0.343	0.202	0.411	0.446	0.054	0	0.019	0.026	0.31	0.261	0.061	0.622	0.329	0.147	0.258	0.583	0.052	0.756	0.279	0.246
FBgn0266521	stai		protein_coding	0.9861	4.349e-07	0.06767	0.6319	0.2794	0.06857	0.205	0.2561	162.204	155.644	177.286	200.764	85.485	104.245	69.735	72.761	65.039	63.932	121.588	75.915	79.312	150.623	116.963	108.79	158.179	108.316	105.843	113.649
FBgn0002632	E(spl)m6-BFM		protein_coding	4.333	4.422e-07	0.02281	0.8768	0.1305	0.4084	0.4956	0.1032	1.573	10.761	1.961	1.491	0.058	0.462	0.036	0.032	0.524	0.971	2.123	1.087	1.933	2.529	4.944	3.897	1.689	9.365	5.636	1.558
FBgn0267072	CR45516		ncRNA	5.032	4.52e-07	0.06388	0.6521	0	1	2.218	0.008418	13.623	11.143	5.065	5.581	0.291	0.412	0	0	0	0	0	0	0.514	0.345	0	0	0	5.915	0.581	1.628
FBgn0038811	PUS1	PUS1	protein_coding	-0.517	4.611e-07	-0.2516	0.01863	-0.3197	0.007679	-0.1707	0.2329	13.59	12.485	16.527	14.561	21.019	19.79	21.913	21.84	25.507	24.278	20.14	18.857	16.728	16.22	12.616	19.392	17.684	15.797	19.447	22.328
FBgn0037857	Tengl4		protein_coding	3.837	4.794e-07	3.817	0.0006618	3.654	0.0007427	4.801	3.433e-06	1.572	0.819	0.352	0.892	0	0.066	0.115	0.026	0.169	0	0.036	2.413	0.986	0.883	2.189	0.787	1.102	3.025	3.251	2.299
FBgn0265351	nac	SLC35C1	protein_coding	-0.7469	4.808e-07	-0.002661	1	-0.001662	1	0.03495	0.8866	6.672	4.339	5.177	4.408	8.224	8.323	9.776	9.433	8.652	8.108	7.294	9.834	7.365	6.915	8.585	7.334	7.959	9.127	8.007	8.076
FBgn0039064	CG4467		protein_coding	-2.165	4.896e-07	-0.01747	0.9193	-0.07291	0.6011	-1.304	0.004488	0.91	1.391	1.535	2.345	8.605	7.392	6.997	7.754	7.268	8.973	3.412	7.231	7.404	2.124	5.03	5.579	2.699	2.629	2.637	0.62
FBgn0263077	CG43340		protein_coding	-0.7408	4.945e-07	-0.1392	0.2445	-0.1592	0.2627	-0.742	5.719e-05	0.965	0.88	0.958	0.879	1.957	1.711	1.276	1.48	1.754	1.66	1.957	1.349	1.628	1.161	1.348	1.412	1.466	1.038	0.963	0.957
FBgn0036629	GluRS-m	EARS2	protein_coding	-0.703	4.973e-07	-0.05281	0.7555	-0.1827	0.1916	-0.2513	0.1205	3.556	3.982	5.101	4.062	6.176	7.979	7.639	6.841	7.846	7.574	7.068	7.449	5.171	7.314	5.226	4.633	6.908	7.203	5.539	5.065
FBgn0037249	eIF3a	EIF3A	protein_coding	-0.3195	4.997e-07	-0.04601	0.7318	-0.01441	0.9053	0.05288	0.6606	169.259	197.01	173.126	167.199	212.34	212.588	229.339	238.289	201.334	179.896	170.789	168.167	175.353	180.755	186.544	174.296	181.195	180.493	189.076	204.434
FBgn0027934	alpha-Est4aPsi		pseudogene	5.73	5.027e-07	2	0.01877	3.973	0.001	2.165	0.008278	0.76	1.491	0.958	1.447	0	0.023	0	0.027	0	0.068	0.038	1.608	0.516	0.289	1.753	2.013	0.824	0.198	0.875	1.044
FBgn0004034	y		protein_coding	2.917	5.062e-07	0.07521	0.5264	0.07154	0.6026	2.329	0.0005401	3.802	5.364	0.851	0.709	0.273	0.243	0.337	0.361	1.402	1.264	0.101	2.804	1.703	0.991	1.957	1.872	0.834	8.49	8.406	1.588
FBgn0085397	Fili		protein_coding	2.091	5.071e-07	0.1095	0.3678	0.02622	0.8705	0.1431	0.4507	3.147	3.105	3.427	3.289	0.673	1.572	0.324	0.182	1.86	1.787	1.448	4.531	3.107	1.821	1.52	1.969	2.406	3.093	3.214	1.454
FBgn0032370	CG12307		protein_coding	2.243	5.182e-07	0.2195	0.1973	0.2671	0.166	-0.01458	0.952	10.518	3.982	6.849	4.986	1.539	0.909	1.606	0.92	0.525	2.299	2.114	6.132	3.232	3.2	4.8	3.801	3.584	0.391	2.308	1.706
FBgn0053509	CG33509		protein_coding	3.183	5.192e-07	0.08803	0.5379	2.562	0.008558	4.152	0.0004569	2.242	1.999	0.811	0.626	0.14	0.286	0	0.079	0	0	0.037	0.11	0	0.166	0.129	0.701	0.789	0.947	1.21	1
FBgn0267986	CR46253		ncRNA	3.834	5.201e-07	-0.05426	0.682	-0.01373	0.936	0.00472	0.9887	2.861	4.509	1.861	2.668	0.259	0.244	0.12	0.036	0.235	0	0.406	0.305	0	0	0	0	0.438	0	0.129	0.422
FBgn0029930	CG12541		protein_coding	-2.026	5.216e-07	-0.382	0.09553	-0.6608	0.04133	-0.1505	0.4286	0.303	0.674	0.255	0.248	2.613	1.747	1.136	1.208	1.177	1.927	1.36	0.794	0.503	0.553	0.789	0.243	0.643	0.632	0.569	1.545
FBgn0050334	CG30334		protein_coding	-3.561	5.335e-07	-4.006	0.0003482	-3.313	0.0004805	-2.77	0.0006796	0.133	0.236	0.311	0.098	2.205	0.969	4.185	4.442	5.786	2.018	4.99	0	0	0.365	0.284	0.193	0.347	0	0.205	0.67
FBgn0260933	rempA	IFT140	protein_coding	-0.619	5.339e-07	-0.05472	0.7468	-0.1999	0.1426	0.1129	0.5262	3.599	3.588	3.665	3.317	6.653	5.878	4.808	5.267	3.569	4.653	3.959	3.666	3.206	4.066	3.33	2.495	3.57	4.842	3.965	4.909
FBgn0266758	Esyt2		protein_coding	1.882	5.369e-07	0.03903	0.7597	-0.03041	0.8502	-0.1004	0.6214	2.086	1.286	1.426	0.823	0.224	0.202	0.53	0.451	2.239	3.406	1.097	3.476	2.933	2.369	0.982	2.665	2.062	1.972	2.347	0.94
FBgn0000053	ade3	GART	protein_coding	-0.7896	5.44e-07	-0.1211	0.3254	-0.2348	0.0959	-0.7885	2.523e-05	19.683	21.212	28.931	26.86	37.672	30.639	54.729	52.432	51.646	51.41	44.775	36.832	37.775	40.35	37.176	32.261	37.223	26.786	27.605	24.466
FBgn0037635	CG9837		protein_coding	1.643	5.656e-07	0.2231	0.1502	1.093	0.005087	1.353	0.0005986	35.965	25.395	23.499	22.599	8.815	14.981	4.227	3.942	5.77	8.528	12.303	20.927	12.566	17.501	24.227	27.716	18.171	32.644	30.046	16.134
FBgn0004607	zfh2		protein_coding	2.599	5.663e-07	0.1817	0.2462	0.0956	0.49	0.406	0.1071	1.316	1.457	0.814	0.793	0.132	0.346	0.059	0.092	0.585	0.385	0.12	1.38	0.95	0.338	0.803	0.822	0.315	1.2	0.884	0.683
FBgn0010453	Wnt4		protein_coding	2.158	5.704e-07	0.05133	0.6563	0.07169	0.6047	0.1838	0.3333	4.375	2.874	1.913	2.144	0.641	0.771	0.457	0.404	0.743	1.175	0.29	1.33	1.512	0.554	1.346	1.133	0.834	1.976	1.515	0.435
FBgn0031851	Aatf		protein_coding	-0.6626	5.783e-07	-0.03677	0.8639	-0.1159	0.4288	-0.04616	0.834	26.848	29.769	25.051	25.29	49.728	47.643	39.413	39.655	44.684	45.957	30.514	39.539	38.445	34.406	32.262	40.614	29.405	38.921	38.55	37.58
FBgn0033571	Rpb5	POLR2E	protein_coding	-0.544	5.783e-07	-0.1727	0.1243	-0.2266	0.07272	-0.3202	0.01534	47.118	43.134	44.978	44.009	69.613	57.985	74.082	68.531	69.14	67.057	53.343	53.378	50.649	45.645	44.011	56.995	46.395	39.541	50.152	50.277
FBgn0267821	da		protein_coding	0.3444	5.908e-07	0.1185	0.2562	0.1982	0.03712	0.108	0.3282	63.923	65.704	58.666	62.085	46.764	53.828	47.476	46.22	41.514	44.44	47.715	48.864	51.881	50.253	55.057	48.196	55.287	49.722	45.552	50.712
FBgn0283649	elgi	RNF41	protein_coding	0.4349	6.071e-07	0.1026	0.4163	0.154	0.2033	0.1642	0.1996	40.22	33.897	36.692	37.061	26.111	27.694	25.867	26.888	25.059	28.715	34.169	31.348	29.583	39.457	34.329	34.683	34.89	33.377	31.497	36.808
FBgn0039767	CG2218		protein_coding	0.3343	6.441e-07	0.04095	0.798	0.2099	0.0238	0.1276	0.2243	57.2	62.259	54.603	57.892	45.528	44.458	45.418	46.145	40.779	41.129	46.598	40.915	44.641	49.133	55.136	48.615	50.554	53.891	44.782	45.542
FBgn0035762	Rint1	RINT1	protein_coding	0.54	6.454e-07	0.1362	0.2522	0.286	0.02089	0.119	0.4646	30.16	29.597	34.295	35.666	21.506	18.933	23.592	22.291	16.018	20.361	18.382	20.772	24.014	22.073	24.162	22.311	27.211	18.569	21.468	21.07
FBgn0026313	X11L		protein_coding	0.345	6.459e-07	0.01072	0.9717	0.07961	0.4865	0.1158	0.3128	12.982	13.582	12.658	12.8	9.403	11.216	9.409	10.316	11.453	10.469	10.819	11.45	10.477	11.224	11.573	11.685	12.179	14.289	11.639	10.838
FBgn0267773	CR46104		ncRNA	2.444	6.459e-07	0.2017	0.2371	0.2237	0.2222	2.654	7.928e-05	8.828	5.451	6.463	4.619	1.367	0.62	0.88	1.231	0.597	0.308	1.202	0.258	1.354	4.288	2.123	1.029	2.717	8.458	6.561	3.881
FBgn0261429	CR42646		ncRNA	3.105	6.529e-07	0.012	0.9502	-0.08197	0.5533	0.2017	0.3078	24.657	33.089	13.415	14.015	1.813	4.45	0.854	1.193	2.56	3.433	1.549	3.552	3.402	2.051	0.273	1.299	2.312	1.004	1.627	13.77
FBgn0035213	CG2199		protein_coding	-0.5072	6.561e-07	-0.03961	0.8472	-0.08882	0.5313	-0.2158	0.102	34.022	28.435	30.61	31.348	45.565	46.453	44.633	45.6	41.503	38.123	36.701	35.577	39.067	34.696	34.4	36.049	33.67	31.077	36.943	27.967
FBgn0027620	Acf		protein_coding	-0.5639	6.625e-07	-0.02627	0.9155	-0.1033	0.468	-0.1619	0.2778	18.591	19.963	25.696	23.387	28.737	31.317	35.989	38.331	42.955	41.955	33.505	38.07	41.473	33.66	39.914	28.738	35.061	33.805	36.022	31.767
FBgn0030788	Sap30	SAP30L,SAP30	protein_coding	0.5206	6.668e-07	0.05708	0.73	0.02041	0.9123	0.08241	0.6403	35.484	23.765	32.08	32.241	20.899	17.788	22.116	22.462	22.695	20.156	21.194	25.791	22.624	21.902	22.279	23.947	19.891	25.097	19.413	24.807
FBgn0024920	Ts		protein_coding	-0.6465	6.711e-07	-0.0513	0.7693	-0.09267	0.5444	-0.606	5.805e-05	59.588	57	70.862	58.304	96.697	91.773	109.502	102.998	95.464	96.068	126.885	92.135	88.001	108.943	90.394	79.639	108.21	64.867	58.102	69.144
FBgn0030855	CG5800	DDX10	protein_coding	-0.4388	6.841e-07	-0.1178	0.3301	-0.07562	0.575	0.1647	0.1904	30.429	30.5	28.64	25.663	43.758	44.017	35.46	36.761	34.012	32.312	27.779	29.406	26.307	25.6	29.251	31.198	25.615	31.175	34.782	40.835
FBgn0000723	FER		protein_coding	-1.63	6.923e-07	-0.1145	0.3339	-0.166	0.2571	-0.8583	0.007357	4.417	8.938	6.735	7.591	26.67	25.324	19.961	20.368	18.369	21.575	31.753	12.589	12.835	17.912	13.189	9.384	20.654	9.499	9.64	10.682
FBgn0039435	TwdlP		protein_coding	7.373	6.937e-07	0.01066	0.9632	0.02999	0.8414	0.1209	0.5158	11.922	3.908	3.142	1.327	0	0	0	0	1.259	3.159	0	3.264	2.598	0.205	3.114	4.552	0.293	8.439	6.738	0
FBgn0037195	CG11226		protein_coding	3.866	7.016e-07	0.2697	0.2257	0.5178	0.1157	0.5755	0.08966	1.621	1.773	2.111	2.106	0.119	0.028	0.037	0.234	0	0	0.14	0.14	0.315	0.775	0.822	0.112	0.67	0.965	0.119	0.498
FBgn0030018	slpr		protein_coding	0.4831	7.028e-07	0.02664	0.9103	-0.05457	0.7178	-0.02257	0.9134	45.476	41.17	31.406	33.745	26.215	27.563	27.416	24.205	20.679	26.78	23.201	25.442	23.938	24.261	20.474	20.362	24.861	26.88	21.218	21.632
FBgn0034240	MESR4		protein_coding	-0.5902	7.078e-07	-0.03673	0.8648	-0.05703	0.7284	0.06683	0.7285	12.636	17.03	15.659	16.793	25.807	31.653	19.315	20.376	19.501	21.11	18.259	18.64	17.253	19.243	20.482	14.731	19.018	21.23	21.236	20.427
FBgn0031453	Bacc		protein_coding	-1.024	7.214e-07	-0.07306	0.5818	0.03358	0.8595	-0.08828	0.6836	239.643	253.657	178.323	207.958	553.284	407.767	463.439	474.14	261.615	273.909	488.646	218.303	202.45	394.149	348.176	367.127	395.33	329.556	303.944	268.426
FBgn0033816	CG4679	PTCD3	protein_coding	-0.5683	7.214e-07	-0.1217	0.3304	-0.3736	0.003261	-0.4835	0.0003374	20.034	19.881	26.667	22.944	30.104	33.96	38.397	35.405	42.693	38.849	30.705	31.76	33.379	27.967	23.936	24.511	28.736	22.07	27.197	24.354
FBgn0017577	Mcm5	MCM5	protein_coding	-0.758	7.288e-07	-0.0375	0.8548	-0.04626	0.7933	-0.2956	0.06403	43.336	50.145	59.995	53.104	84.537	83.505	98.687	99.871	79.262	85.967	98.551	70.668	74.301	96.978	83.268	69.214	90.547	55.8	62.562	74.318
FBgn0031816	Rchy1	RCHY1	protein_coding	1.163	7.424e-07	1.003	0.001401	1.382	6.944e-06	1.943	1.205e-11	45.294	57.225	25.522	28.352	18.679	16.752	14.588	15.492	12.691	9.883	14.981	22.013	20.905	39.545	36.072	30.822	36.011	44.799	39.256	67.386
FBgn0034001	mRpL41	MRPL41	protein_coding	-0.5938	7.44e-07	-0.221	0.0512	-0.3628	0.006972	-0.2371	0.112	26.375	21.273	27.777	25.895	39.594	30.741	44.477	43.99	46.512	42.578	36.74	32.759	32.91	26.688	28.084	30.25	27.355	24.199	36.547	35.16
FBgn0033246	ACC	ACACB	protein_coding	-0.7563	7.502e-07	-0.03143	0.8873	-0.3638	0.01406	-0.6861	8.411e-05	34.238	38.874	45.816	44.177	60.395	57.006	87.583	84.032	85.897	86.238	69.494	80.6	84.111	60.122	59.755	46.15	53.723	46.269	44.915	45.126
FBgn0030530	jub		protein_coding	0.4074	7.646e-07	0.09688	0.4426	0.04248	0.7678	0.2151	0.06094	28.864	27.342	26.41	25.771	19.317	19.392	20.353	20.869	18.848	17.718	20.868	21.867	19.765	23.143	20.737	17.719	22.148	20.657	20.253	26.98
FBgn0037504	CG1142		protein_coding	-0.5188	7.803e-07	-0.03379	0.8775	0.02654	0.8824	-0.1856	0.191	46.357	48.658	41.553	41.005	79.927	66.203	59.422	57.082	48.628	61.178	61.495	47.976	55.107	59.028	58.12	65.52	55.212	42.953	50.818	49.806
FBgn0263132	Cht6		protein_coding	1.11	8.422e-07	1.069	0.0004748	1.276	1.699e-05	1.065	0.0001236	2.543	2.287	2.107	2.092	1.027	1.241	0.861	0.793	1.543	1.39	1.1	3.24	3.034	2.719	3.793	3.562	2.858	3.597	3.47	2.201
FBgn0027779	VhaSFD	ATP6V1H	protein_coding	0.5024	8.478e-07	0.1597	0.1538	0.2206	0.06857	0.2533	0.04503	118.912	111.97	102.512	101.175	70.219	84.697	71.349	70.938	86.379	83.093	76.452	109.727	103.448	88.724	111.334	105.408	91.743	116.3	109.004	82.741
FBgn0266350	CR44999		ncRNA	-0.9621	8.977e-07	-0.214	0.09782	-0.194	0.1771	-0.2604	0.1404	49.867	60.099	34.353	38.32	102.993	121.864	79.338	73.023	66.218	66.263	89.842	39.124	40.443	65.314	49.16	37.681	69.884	52.844	44.949	61.671
FBgn0259989	CG42486		protein_coding	5.776	9.216e-07	0.01697	0.9186	0.05501	0.7011	0.1406	0.4566	1.01	1.19	0.909	1.355	0.035	0	0	0	0.257	0.496	0	1	0.125	0	1.174	0.266	0.08	0.861	0.846	0.132
FBgn0001301	kel		protein_coding	1.023	9.261e-07	0.9935	0.0003961	1.297	1.397e-06	0.4677	0.01486	149.422	175.809	187.344	198.402	72.23	41.443	103.34	112.242	85.531	101.374	53.674	139.772	143.493	223.449	199.638	174.581	238.695	148.7	137.321	119.538
FBgn0031217	CG11377		protein_coding	-0.5638	9.267e-07	-0.02281	0.9317	-0.1845	0.1608	-0.405	0.00281	31.411	30.378	37.341	37.201	48.125	42.198	58.042	60.888	51.231	49.557	43.467	46.243	53.27	39.125	37.8	42.293	35.973	26.569	36.185	36.494
FBgn0036974	eRF1	ETF1	protein_coding	-0.3184	9.28e-07	-0.1085	0.2925	-0.1915	0.03176	-0.1437	0.1245	78.632	77.698	87.617	87.052	97.868	93.962	114.341	111.909	117.288	112.951	100.437	95.779	100.917	100.208	89.906	94.201	97.451	88.873	97.537	107.34
FBgn0039301	Nup37	NUP37	protein_coding	-0.6913	9.705e-07	-0.1131	0.3708	-0.1214	0.4117	-0.4188	0.007174	18.319	19.535	21.039	17.448	32.044	23.997	38.48	34.703	35.037	35.078	32.977	24.921	29.696	28.12	26.748	28.987	29.736	19.091	23.022	25.632
FBgn0039120	Nup98-96		protein_coding	-0.5328	9.848e-07	-0.02786	0.9065	-0.05367	0.7358	0.2415	0.06929	104.284	135.66	107.796	104.683	157.914	223.546	142.863	153.123	143.753	137.388	115.209	128.607	125.828	124.294	142.073	107.304	119.075	163.346	160.539	168.7
FBgn0032889	CG9331		protein_coding	-1.301	1.002e-06	-0.2048	0.1408	-1.531	9.723e-06	-0.856	0.002845	4.905	6.247	4.523	4.627	13.412	9.143	16.165	14.842	22.677	17.306	8.606	11.498	9.477	7.559	4.274	6.078	5.333	6.373	4.844	10.464
FBgn0015795	Rab7	RAB7A	protein_coding	0.548	1.024e-06	0.06002	0.7136	0.1079	0.443	0.09621	0.5691	207.1	173.088	195.861	212.315	130.957	147.87	116.424	124.89	112.993	125.726	161.417	145.534	126.969	168.857	139.621	147.756	171.528	157.209	143.932	138.733
FBgn0039156	CG6178		protein_coding	-0.8529	1.025e-06	-0.2152	0.08599	-0.2325	0.1078	-0.5799	0.001826	27.137	35.386	35.681	39.583	61.088	65.749	68.021	68.07	56.756	49.282	88.505	34.379	39.518	57.508	39.462	36.467	60.397	32.876	35.43	44.159
FBgn0034029	eIF2Bgamma	EIF2B3	protein_coding	-0.4107	1.032e-06	-0.008738	0.9792	-0.2096	0.06302	0.05632	0.7285	25.026	24.489	28.071	27.214	35.161	40.418	33.846	33.094	35.08	34.637	35.161	32.823	36.391	34.286	25.77	30.211	29.439	30.781	40.129	37.635
FBgn0038819	Cpr92F		protein_coding	6.25	1.044e-06	0.02967	0.8315	0.05693	0.6938	0.2937	0.2122	0.687	0.486	0.613	0.439	0	0	0	0	0.705	0.693	0	1.164	0.934	0.376	1.074	1.59	0.159	2.436	2.745	0.362
FBgn0030065	CG12075		protein_coding	2.496	1.096e-06	0.02042	0.8915	0.03575	0.8012	0.05187	0.8059	3.844	3.161	3.507	3.307	0.313	0.509	0.65	0.666	1.938	2.637	0.783	3.047	3.058	0.664	3.282	3.029	0.676	2.274	3.883	0.484
FBgn0031298	Atg4a	ATG4A,ATG4B	protein_coding	0.4102	1.096e-06	0.06217	0.6886	0.1179	0.3406	0.3709	0.0005786	21.797	18.727	20.06	19.983	15.304	15.911	13.632	14.322	11.593	12.99	14.506	12.99	13.899	15.607	15.029	14.546	15.033	16.188	17.83	18.689
FBgn0037556	CG9636	CUEDC2	protein_coding	0.533	1.121e-06	0.006909	0.9851	0.07038	0.6442	-0.02626	0.9037	61.037	58.784	65.601	71.971	41.553	44.079	41.809	44.372	47.719	51.457	45.931	53.546	45.406	47.923	56.427	52.769	50.377	53.711	53.008	35.773
FBgn0262579	Ect4		protein_coding	0.7315	1.124e-06	0.1131	0.3678	-0.02075	0.9225	0.387	0.01418	19.277	19.393	22.316	22.479	10.351	15.662	11.169	10.731	10.974	11.893	8.58	13.874	12.652	12.984	11.049	6.904	12.274	14.102	15.99	16.053
FBgn0086442	mib2	MIB2	protein_coding	0.4488	1.136e-06	0.04954	0.7732	0.08053	0.5553	0.1859	0.1425	32.324	31.2	38.337	37.479	22.264	24.912	25.841	26.416	20.967	19.608	22.767	20.854	22.779	24.264	22.614	19.665	27.278	23.617	24.524	26.152
FBgn0035001	Slik		protein_coding	-0.5193	1.178e-06	-0.1783	0.105	-0.3691	0.001826	-0.5605	7.017e-06	36.437	42.132	48.398	49.41	59.113	64.895	67.55	70.001	62.047	59.394	59.479	46.575	49.432	47.551	46.885	34.723	46.129	36.355	35.944	42.777
FBgn0265534	CR44384		ncRNA	3.686	1.218e-06	1.723	0.02528	3.232	0.003503	3.379	0.001517	2.056	3.229	2.692	3.411	0.132	0.124	0.163	0.296	0	0.185	0.103	1.554	1.164	2.658	2.919	2.229	3.418	8.57	1.316	0.614
FBgn0028479	Mtpalpha	HADHA	protein_coding	-0.6561	1.231e-06	-0.1943	0.0917	-0.499	0.0009645	-0.7544	2.805e-06	116.8	135.509	136.283	126.174	157.499	150.064	284.665	255.488	244.529	242.254	181.127	164.551	182.729	147.556	146.33	126.396	149.459	116.309	113.15	140.461
FBgn0259481	Mob2		protein_coding	0.523	1.259e-06	0.5427	7.59e-05	0.327	0.006972	0.1574	0.2916	21.109	27.955	21.865	24.811	17.744	17.945	13.417	15.292	11.965	10.816	11.443	19.717	17.75	15.616	18.251	13.583	15.69	13.867	13.186	12.736
FBgn0002023	Lim3		protein_coding	5.082	1.314e-06	0.007837	0.9728	0.09358	0.5322	0.1543	0.4219	0.975	1.206	0.532	0.66	0.015	0.007	0	0.043	0.306	0.215	0.036	0.289	0.243	0.127	0.889	0.402	0.259	0.933	0.55	0.1
FBgn0037987	CG14739	UBE2H	protein_coding	4.09	1.315e-06	0.405	0.1607	0.8241	0.06616	2.508	0.00585	7.363	4.003	2.747	2.158	0.399	0.034	0.09	0.204	0	0	0.114	0.514	0.128	1.12	1.608	0.136	0.737	2.951	1.595	0.406
FBgn0278598	CR46268		ncRNA	-0.5163	1.349e-06	-0.1132	0.3721	-0.04782	0.7692	-0.6125	3.573e-06	8.343	11.187	11.495	12.605	16.135	18.587	14.623	15.37	14.9	14.975	15.797	13.018	11.473	14.183	13.543	13.477	15.609	8.374	9.171	10.149
FBgn0266451	fau		protein_coding	2.238	1.363e-06	-0.04563	0.7117	0.06102	0.6856	0.2394	0.216	1.836	1.917	0.389	0.492	0.257	0.151	0.238	0.216	3.386	2.975	4.934	3.331	2.949	2.209	4.978	7.119	3.041	7.568	8.077	3.832
FBgn0010909	msn		protein_coding	0.6216	1.369e-06	1.211	4.561e-14	1.191	1.264e-13	1.31	1.005e-16	88.944	90.58	98.915	100.058	62.103	85.972	41.358	46.438	37.401	42.478	36.755	94.498	87.233	92.038	94.02	83.085	92.624	97.509	101.054	94.315
FBgn0035211	CG2211		protein_coding	0.5415	1.381e-06	0.07091	0.6474	0.1965	0.1414	0.4357	0.001761	16.625	12.53	15.827	17.758	10.836	9.376	10.589	10.694	7.976	9.571	11.402	10.741	9.833	12.491	12.144	12.237	12.748	10.423	15.901	15.668
FBgn0030330	Tango10		protein_coding	0.3649	1.429e-06	0.2037	0.0303	0.08759	0.4744	0.04128	0.8046	16.913	15.212	17.472	18.852	11.313	13.151	14.167	13.59	13.827	13.652	12.984	17.598	16.886	15.508	13.403	14.972	15.627	15.33	13.815	13.241
FBgn0039687	Naa40	NAA40	protein_coding	-0.6921	1.453e-06	-0.04164	0.8341	-0.218	0.1163	-0.5065	0.001667	46.968	26.98	39.45	35.315	64.932	52.139	71.242	62.604	68.928	64.478	67.047	60.432	69.938	53.108	44.839	56.017	48.37	39.422	36.248	48.788
FBgn0033587	CG13218		protein_coding	1.713	1.488e-06	0.05784	0.62	0.1488	0.3056	0.4025	0.08198	12.536	8.917	7.769	6.602	2.001	2.422	2.785	2.815	4.554	2.638	3.142	6.201	5.751	3.566	5.201	6.118	6.355	6.617	5.001	9.108
FBgn0266596	CR45121		ncRNA	5.428	1.52e-06	2.714	0.009308	0.7305	0.07692	0.4208	0.1373	1.994	1.626	3.303	2.036	0	0.056	0.073	0	0	0.166	0	2.504	0.417	2.1	0	0.443	1.464	0.48	0.471	0.44
FBgn0265595	CG44422		protein_coding	3.573	1.558e-06	0.0386	0.7461	0.01917	0.9003	1.533	0.009431	0.183	0.185	0.148	0.09	0.008	0.022	0.01	0	0.085	0.11	0.006	0.184	0.124	0.028	0.13	0.103	0.018	0.54	0.437	0.109
FBgn0027569	cert	COL4A3BP	protein_coding	-0.8989	1.564e-06	-0.1094	0.3652	-0.3372	0.04063	-0.303	0.08693	3.112	3.718	4.288	5.239	6.587	8.118	8.719	9.023	5.256	7.897	6.02	6.337	4.148	3.966	5.44	2.249	4.381	3.304	5.186	4.422
FBgn0037562	CG11671		protein_coding	1.438	1.565e-06	-0.09616	0.4028	-0.4316	0.05236	-0.2114	0.2655	53.012	39.026	52.386	33.558	14.986	11.887	19.249	14.916	28.329	30.521	23.676	19.957	21.232	12.552	16.508	14.458	10.412	12.899	15.363	25.288
FBgn0261561	CG42675		protein_coding	2.75	1.578e-06	0.4651	0.104	0.17	0.3006	1.106	0.01993	3.723	1.48	1.12	1.304	0.298	0.225	0.221	0.215	0.043	0.436	0.262	1.463	0.59	0.821	1.123	0.449	0.404	1.164	0.81	1.38
FBgn0035584	CG17030		protein_coding	5.122	1.593e-06	2.143	0.01646	4.149	0.00148	1.237	0.02642	3.774	3.334	3.101	4.829	0.043	0.04	0.105	0.096	0	0	0	2.618	0.151	0.203	2.128	2.246	1.348	1.041	0.853	0
FBgn0031814	retm		protein_coding	-0.6415	1.594e-06	-0.03551	0.8717	-0.03741	0.8326	-0.29	0.05502	7.065	5.922	7.231	7.483	9.76	10.998	12.094	12.274	13.067	14.069	13.892	11.812	14.475	11.95	13.575	14.203	11.019	12.158	12.194	7.064
FBgn0032727	CG10623		protein_coding	-1.042	1.594e-06	-0.1246	0.2927	-0.1316	0.3644	-0.2154	0.2408	15.252	16.221	21.916	23.002	40.656	41.733	46.111	39.405	36.727	37.161	65.25	23.546	30.243	43.247	33.217	32.177	38.45	31.48	31.69	39.084
FBgn0003870	ttk		protein_coding	0.613	1.601e-06	0.09643	0.4741	0.1523	0.273	0.4266	0.002914	28.956	32.05	25.866	26.61	18.799	22.041	14.589	15.701	17.949	19.569	16.892	22.194	18.613	23.589	22.747	21.497	22.216	30.857	26.858	22.57
FBgn0027610	Dic1	AC139530.2,SLC25A10	protein_coding	-1.012	1.601e-06	-0.05333	0.7163	-0.07011	0.6747	-0.4731	0.01541	8.247	11.022	7.568	9.623	19.811	20.258	18.797	19.586	27.633	25.501	25.524	21.534	23.332	20.926	21.134	21.614	23.703	24.225	16.843	6.403
FBgn0024245	dnt		protein_coding	-0.6533	1.619e-06	-0.07404	0.626	-0.1198	0.4152	-0.3767	0.01262	11.163	12.275	17.123	19.127	26.5	23.568	23.088	25.186	23.556	23.977	21.053	19.546	19.944	19.729	19.789	20.799	16.989	17.047	18.98	12.079
FBgn0025336	CG4882		protein_coding	-0.5637	1.619e-06	-0.1408	0.2371	-0.1589	0.2371	-0.1599	0.3007	39.273	37.007	30.564	25.291	49.951	50.26	51.431	51.062	56.028	50.566	48.286	39.037	51.719	34.362	50.294	42.386	35.385	47.148	42.788	42.928
FBgn0029176	eEF1gamma	EEF1G	protein_coding	-0.3938	1.656e-06	-0.1149	0.3213	-0.04397	0.7433	-0.1024	0.425	839.634	964.612	725.918	702.902	1061.8	1047.04	1128.3	1102.86	1081.9	1023.64	1004.02	848.904	892.836	989.357	990.501	968.296	990.196	920.755	900.55	1033.12
FBgn0263663	CR43654		ncRNA	3.226	1.673e-06	3.372	0.001483	0.4294	0.1353	1.083	0.03145	1.903	0.786	0.992	0.875	0.104	0.063	0.082	0.15	0.035	0.027	0.045	0.852	0.907	0.226	0	0.179	0.386	0.309	0.38	0.177
FBgn0027081	ThrRS		protein_coding	-0.3338	1.693e-06	-0.1111	0.3012	-0.191	0.04439	-0.1565	0.1123	113.751	121.483	115.367	104.97	133.925	141.075	156.831	150.933	143.431	123.313	129.153	105.269	119.828	127.78	108.32	106.411	121.22	109.473	111.856	127.197
FBgn0036691	beg	MCAT	protein_coding	-0.5313	1.693e-06	-0.1535	0.1868	-0.07128	0.6482	-0.1896	0.2034	21.89	22.854	22.83	21.067	32.137	31.464	36.203	33.147	30.02	24.95	29.918	21.657	22.015	23.871	22.401	29.381	24.846	22.664	21.505	25.946
FBgn0051693	CG31693		protein_coding	-2.246	1.739e-06	-0.03753	0.7541	-1.737	0.006483	-5.621	3.468e-06	0.437	0.468	1.155	0.79	3.019	1.412	5.526	5.456	1.443	1.415	1.221	1.224	1.079	0.543	0.338	0.23	0.241	0	0	0
FBgn0034398	CG15098		protein_coding	0.6928	1.757e-06	0.01611	0.9598	0.189	0.1718	0.385	0.0123	1245.44	1222.47	1130.93	1228.17	841.201	886.03	518.485	601.429	559.947	489.952	634.13	552.603	521.805	670.108	758.602	717.37	711.237	820.361	841.613	790.49
FBgn0038390	Rbf2		protein_coding	-0.6527	1.77e-06	0.05149	0.764	-0.003015	0.9955	-0.09137	0.6418	7.145	8.044	8.85	8.719	13.142	12.483	13.837	14.541	12.205	11.645	13.633	14.05	11.168	16.39	11.649	9.688	15.715	11.466	11.024	11.52
FBgn0026090	CG14812		protein_coding	0.5407	1.786e-06	-0.03867	0.8536	0.0599	0.7115	0.0554	0.7825	100.644	91.223	76.238	81.413	61.301	67.958	50.447	51.395	52.713	64.332	70.557	56.614	57.26	62.012	62.402	72.43	69.899	63.395	68.976	66.246
FBgn0033754	Ak6	AK6	protein_coding	-0.6876	1.818e-06	-0.01579	0.9605	-0.09189	0.5575	-0.1415	0.4299	16.167	17.843	17.283	16.424	27.236	29.811	30.159	27.382	29.479	36.348	27.516	29.541	32.701	27.761	22.443	30.291	26.801	32.198	27.038	22.332
FBgn0032485	CG9426		protein_coding	0.3938	1.83e-06	0.06041	0.6923	0.05088	0.7135	0.08222	0.5691	27.891	24.852	27.871	29.636	18.595	22.067	20.737	20.667	23.787	20.45	21.933	24.01	20.236	26.944	20.616	23.617	25.563	23.409	24.274	23.207
FBgn0030347	CG15739		protein_coding	-1.321	1.845e-06	-0.02964	0.8693	-0.1458	0.3055	-0.1704	0.3719	1.949	1.213	1.296	1.15	4.321	2.283	4.207	4.044	5.063	8.421	4.97	6.565	6.128	3.558	3.202	4.668	4.444	4.178	4.448	4.833
FBgn0264305	CG43783		protein_coding	0.4809	1.86e-06	0.06483	0.6818	0.09516	0.4958	0.02667	0.8986	14.727	15.746	18.349	19.553	10.217	14.751	10.827	11.698	12.45	13.613	15.239	15.976	14.724	14.966	15.532	15.237	15.755	14.696	14.92	13.027
FBgn0035827	Srp9	SRP9	protein_coding	0.374	1.883e-06	0.1066	0.3787	0.1009	0.4124	0.2875	0.006661	74.047	68.468	62.222	57.735	51.117	49.977	49.969	47.113	46.852	55.114	51.412	64.709	57.203	53.667	54.332	58.912	57.576	64.197	54.955	73.193
FBgn0050416	CG30416		protein_coding	6.422	1.986e-06	1.138	0.0485	2.259	0.01225	0.9806	0.04061	0.919	2.193	0.803	0.814	0	0	0.022	0	0	0	0.139	1.167	0.874	1.427	1.273	2.658	1.196	1.006	1.554	0.099
FBgn0026415	Idgf4		protein_coding	1.594	2.029e-06	0.1093	0.3555	0.1523	0.2899	0.02343	0.9288	15.831	21.491	30.34	29.063	6.225	9.148	7.192	7.003	23.441	27.38	12.431	43.957	46.799	13.855	39.647	47.04	16.914	22.642	32.944	11.454
FBgn0037525	CG17816		protein_coding	1.415	2.038e-06	1.497	0.0001333	1.774	2.3e-06	0.5117	0.02923	10.933	15.274	16.034	20.439	6.348	4.727	5.252	5.476	6.173	5.795	7.046	11.825	12.445	33.768	19.002	15.27	35.676	14.691	9.557	13.243
FBgn0004101	bs		protein_coding	-0.9343	2.059e-06	-0.06422	0.6512	0.05929	0.7327	-0.1127	0.5823	2.221	4.228	2.544	3.289	6.916	7.881	4.788	5.469	4.598	6.104	5.691	3.385	4.756	5.239	8.44	5.574	4.949	4.111	4.286	5.468
FBgn0266669	Sec3		protein_coding	-0.381	2.077e-06	-0.1316	0.2371	-0.1488	0.1943	-0.1511	0.2072	15.966	19.306	19.889	21.365	25.209	24.686	25.909	26.196	26.736	26.327	22.214	19.125	22.845	22.42	24.846	19.595	20.858	21.747	23.093	21.273
FBgn0015268	Nap1		protein_coding	-0.4231	2.134e-06	-0.2843	0.002558	-0.1643	0.1606	-0.2939	0.007426	265.496	327.779	244.484	248.708	357.27	392.17	378.803	366.094	434.796	409.091	386.708	283.981	282.969	357.206	343.396	345.327	357.112	326.597	307.682	331.165
FBgn0004868	Gdi	GDI1,GDI2	protein_coding	0.4015	2.147e-06	0.03684	0.8518	0.001775	0.9989	0.01685	0.9302	265.951	212.007	256.617	246.385	165.213	159.896	208.212	192.562	204.462	189.673	183.879	205.443	214.928	186.458	185.386	200.278	193.346	192.965	194.885	198.124
FBgn0036029	CG16719		protein_coding	3.868	2.19e-06	0.1924	0.2959	0.3479	0.1689	1.523	0.01636	0.867	1.161	0.963	0.639	0.091	0.029	0.037	0.034	0.221	0	0.048	0.858	0.321	0.072	0.839	0.114	0.41	0.739	0.848	0.735
FBgn0031974	CG12560		protein_coding	-1.529	2.194e-06	-0.05306	0.6725	-0.03478	0.8328	-0.3243	0.1114	1.198	1.512	0.747	1.073	2.696	1.615	4.92	4.956	4.787	4.714	4.387	2.328	3.604	4.217	4.738	2.597	4.751	1.605	1.446	3.989
FBgn0039059	CG13829		protein_coding	6.455	2.216e-06	0.2795	0.2242	0.2805	0.2131	0.1883	0.3393	4.205	5.386	5.016	4.573	0	0	0.1	0	0	0	0	0.191	0.286	0.48	0	0	0.729	0	0.323	0.075
FBgn0003963	ush		protein_coding	0.9622	2.275e-06	1.055	0.0001532	0.5317	0.01016	0.607	0.003727	10.678	11.029	12.627	12.395	5.273	5.432	5.388	6.41	6.837	7.131	3.997	14.923	14.903	9.143	11.005	10.039	10.827	11.988	14.626	6.174
FBgn0264493	rdx		protein_coding	0.5652	2.276e-06	0.1444	0.2237	0.1967	0.1376	0.2639	0.06198	59.186	43.637	44.617	46.197	36.177	33.379	26.502	29.658	25.643	26.612	23.407	33.61	32.05	28.62	30.356	34.458	30.56	36.059	32.679	28.457
FBgn0036660	CG13025		protein_coding	-0.5302	2.313e-06	-0.08811	0.5317	0.009302	0.9667	-0.05392	0.7904	5.198	4.177	5.183	4.651	7.021	6.042	8.027	7.653	8.179	7.574	7.119	6.335	7.062	6.301	8.648	8.257	6.505	6.687	6.653	7.903
FBgn0037377	CG1218	HPF1	protein_coding	-0.5232	2.346e-06	-0.02528	0.9217	0.1171	0.4041	-0.1306	0.4105	20.706	21.157	18.173	20.399	30.602	27.202	31.641	30.347	27.22	31.532	33.095	25.859	31.897	30.257	38.072	34.999	34.01	31.483	30.848	20.775
FBgn0030300	Sk1		protein_coding	0.9633	2.347e-06	0.1054	0.3759	0.6602	0.005191	1.038	6.862e-05	13.076	13.275	13.343	15.784	7.352	7.269	5.66	6.388	4.176	4.579	7.112	6.606	6.205	9.101	10.49	11.435	8.339	13.44	15.132	7.516
FBgn0262636	dati		protein_coding	3.113	2.357e-06	0.01977	0.8946	0.07117	0.6071	1.132	0.02138	0.648	0.617	0.401	0.224	0.042	0.08	0.007	0.048	0.231	0.089	0.017	0.05	0.262	0.113	0.235	0.259	0.108	0.517	0.445	0.593
FBgn0030376	CG2750		protein_coding	3.791	2.363e-06	-0.005955	0.9792	-0.1085	0.4769	-0.008208	0.9744	0.83	0.866	0.313	0.225	0.056	0.048	0.007	0.013	0.041	0.236	0.035	0.026	0.059	0.173	0.031	0	0.063	0.182	0.022	0.104
FBgn0086347	Myo31DF	MYO1G	protein_coding	0.5387	2.378e-06	0.3068	0.007099	0.2741	0.0288	0.4608	0.0004978	65.82	56.16	62.274	61.43	38.945	46.732	36.514	40.646	29.427	30.841	38.898	44.707	40.558	54.853	42.161	36.368	54.137	50.365	52.305	44.875
FBgn0264268	CR43768		ncRNA	5.222	2.397e-06	0.5977	0.1057	1.289	0.03465	1.951	0.01121	2.895	3.663	2.995	3.242	0.041	0.117	0	0.046	0	0	0.065	0.389	0.728	1.077	1.599	1.395	0.372	0.671	3.459	0
FBgn0036007	path		protein_coding	-1.638	2.417e-06	-0.04366	0.7266	-0.02457	0.8886	-0.09047	0.6654	32.885	57.396	28.442	27.491	129.142	209.771	76.788	79.445	110.663	99.597	251.023	72.796	75.016	200.365	105.334	105.736	201.49	118.307	98.196	152.948
FBgn0265713	CR44520		ncRNA	6.187	2.418e-06	0.1153	0.4586	0.1988	0.3003	1.043	0.03518	0.578	0.681	0.785	1.089	0	0	0	0	0	0	0	0	0	0.234	0	0	0.279	0.401	0.592	0
FBgn0034494	CG10444	SLC5A6	protein_coding	-0.9637	2.442e-06	-0.07352	0.5793	-0.6865	0.003586	-1.058	3.503e-05	10.681	10.892	24.508	20.477	28.654	25.991	44.635	39.401	56.854	48.687	34.435	43.785	39.553	28.076	23.852	23.379	27.082	18.891	22.921	20.575
FBgn0031244	CG11601		protein_coding	-0.5804	2.446e-06	-0.09909	0.4563	0.04043	0.8165	0.0484	0.8236	7.33	7.701	8.941	9.167	12.21	15.002	13.347	11.203	14.271	13.745	11.882	11.381	10.675	11.132	14.986	14.494	13.022	13.016	13.06	15.057
FBgn0035985	Cpr67B		protein_coding	2.142	2.47e-06	1.74	0.005961	2.342	0.0004599	3.006	1.827e-06	5.058	8.44	2.649	1.927	1.036	1.254	0.641	0.692	0.354	0.82	0.407	2.294	2.176	3.155	3.052	2.559	4.241	4.48	6.215	4.656
FBgn0001128	Gpdh	GPD1,GPD1L	protein_coding	-0.3653	2.487e-06	-0.06559	0.6437	-0.135	0.2259	-0.3378	0.0005986	18.774	22.145	22.448	23.245	27.013	29.005	29.471	28.466	32.379	32.738	34.928	32.681	31.524	28.697	28.764	31.119	28.189	28.629	28.794	20.614
FBgn0267242	CR45682		ncRNA	2.215	2.488e-06	0.3432	0.1419	0.05595	0.6898	0.2394	0.2508	0.771	0.653	1.375	1.28	0.204	0.245	0.115	0.208	0.202	0.26	0.058	0.962	0.459	0.264	0.411	0.209	0.209	0	0.296	0.588
FBgn0003204	ras	IMPDH1	protein_coding	-0.4612	2.499e-06	-0.1973	0.0588	-0.0245	0.8862	-0.1586	0.2434	32.56	41.694	31.188	31.501	45.413	56.9	46.952	45.123	49.737	47.075	54.072	38.528	36.123	44.494	50.298	45.904	49.893	45.139	44.17	42.104
FBgn0027079	ValRS		protein_coding	-0.4856	2.551e-06	-0.01557	0.9606	-0.03809	0.8104	0.0694	0.692	49.834	52.129	52.322	51.558	72.045	88.481	68.75	68.546	62.65	59.084	46.789	59.023	57.328	48.01	55.376	50.029	54.334	53.597	61.556	63.699
FBgn0022288	l(2)09851	GRWD1	protein_coding	-0.6002	2.553e-06	-0.04709	0.802	-0.08461	0.5868	-0.251	0.09302	32.863	33.836	29.083	28.219	47.955	47.002	49.595	51.617	52.606	45.299	35.131	47.158	39.857	34.628	40.851	40.706	35.727	29.691	38.85	34.429
FBgn0261479	nero		protein_coding	-0.5822	2.621e-06	-0.06442	0.6893	-0.2205	0.09977	-0.2333	0.1208	22.929	24.982	24.107	22.036	37.232	36.416	36.427	36.869	41.05	35.747	28.763	33.965	34.993	24.833	27.508	27.508	25.393	20.072	22.892	37.277
FBgn0032077	CG9515		protein_coding	-0.6343	2.675e-06	-0.04911	0.7818	-0.01553	0.9448	0.1086	0.5638	6.702	7.651	6.5	7.505	12.27	15.373	8.925	9.371	10.3	10.993	12.426	8.705	10.342	11.177	10.925	9.807	12.13	11.9	13.218	12.938
FBgn0038279	Sdr		protein_coding	-2.425	2.711e-06	-0.3366	0.1296	-1.241	0.01521	-0.7623	0.03336	0.084	0.098	0.243	0.092	0.554	0.326	1.033	1.382	1.666	0.926	0.718	0.72	0.256	0.248	0.178	0.363	0.272	0.327	0.257	0.435
FBgn0034933	CG3735	UTP25	protein_coding	-0.4309	2.718e-06	0.001633	1	-0.1456	0.2473	-0.1454	0.2937	10.784	9.576	11.644	11.646	15.884	16.677	14.506	13.295	15.686	15.197	14.368	16.732	14.786	13.991	12.296	13.861	12.377	12.863	12.843	13.708
FBgn0051755	SoYb		protein_coding	-0.6206	2.737e-06	-0.06891	0.6573	-0.2921	0.02932	-0.3951	0.006891	20.015	23.719	27.08	28.034	39.607	42.195	38.233	38.977	44.515	47.736	39.069	45.743	36.995	32.657	33.909	29.382	30.738	32.589	32.848	25.589
FBgn0004858	elB		protein_coding	-1.001	2.752e-06	-0.9875	0.00076	-0.8803	0.001368	-0.7273	0.001984	9.779	12.921	7.359	8.834	23.535	15.867	20.789	23.038	17.007	17.393	10.035	6.547	6.191	8.014	6.542	6.29	8.616	6.723	7.078	8.63
FBgn0030328	Amun		protein_coding	0.3385	2.807e-06	0.04123	0.7996	0.007194	0.9631	-0.02829	0.8568	141.472	125.249	116.646	116.749	95.908	82.77	108.611	101.96	97.301	95.756	94.402	101.58	99.041	101.211	100.741	85.047	104.174	98.294	95.699	87.439
FBgn0025637	SkpA	SKP1	protein_coding	0.3445	2.823e-06	0.017	0.9465	0.02004	0.8836	-0.1523	0.1463	224.253	197.743	208.014	208.384	156.152	134.383	178.279	180.654	203.902	196.501	187.484	205.023	202.785	192.619	189.042	214.511	198.503	167.972	183.132	168.673
FBgn0033058	CCHa2-R	NMBR,GRPR	protein_coding	3.251	2.832e-06	0.5316	0.1183	2.125	0.01277	3.816	0.0004773	0.348	0.513	0.186	0.299	0.022	0.084	0	0	0.041	0	0.017	0.158	0.079	0.238	0.309	0.168	0.403	0.453	0.579	0.624
FBgn0034924	CG17658		protein_coding	-1.199	2.844e-06	0.04327	0.7598	-0.0209	0.9127	0.00175	1	0.5	0.535	0.502	0.703	1.605	1.269	1.252	1.394	1.27	0.932	1.232	1.483	1.172	1.533	0.967	0.656	1.418	1.136	0.976	1.27
FBgn0005655	PCNA	PCNA	protein_coding	-0.4901	2.848e-06	0.01704	0.9569	-0.04696	0.7681	-0.1871	0.1702	252.328	213.091	249.593	205.421	354.984	292.454	349.113	340.165	318.419	317.076	376.767	329.659	350.156	360.512	276.056	321.132	352.248	254.25	246.521	351.912
FBgn0039403	Sld5	GINS4	protein_coding	-0.6586	2.864e-06	-0.04626	0.8034	-0.1736	0.2143	-0.1859	0.2709	14.65	18.683	18.204	13.157	28.225	27.819	27.478	24.138	31.736	19.631	28.298	24.774	20.501	26.439	18.062	25.155	18.537	24.794	17.087	23.384
FBgn0033379	Mys45A	SDAD1	protein_coding	-0.5058	2.889e-06	-0.08469	0.5507	-0.2093	0.0985	-0.2995	0.02169	36.2	35.679	35.463	33.563	52.213	56.094	49.127	49.749	58.37	55.104	39.421	43.773	51.41	38.969	38.09	43.861	39.392	42.189	42.331	32.903
FBgn0039136	CG5902	AMMECR1,AMMECR1L	protein_coding	0.5492	2.901e-06	0.1605	0.1657	0.1086	0.4503	0.2287	0.112	56.893	40.428	56.514	56.555	34.299	30.186	36.756	36.953	37.443	43.116	35.256	55.901	49.912	41.198	45.239	47.693	40.932	50.898	51.482	42.055
FBgn0265453	CR44353		ncRNA	5.005	2.911e-06	0.06466	0.6352	0.1996	0.2982	0.653	0.07589	5.608	1.651	3.857	4.323	0.196	0.093	0	0	0	0.275	0.154	0.925	0.346	0.465	1.086	1.105	0.663	3.188	0	1.828
FBgn0029814	CG15765		protein_coding	4.764	2.935e-06	0.05595	0.6521	0.04776	0.7376	0.1784	0.3633	0.621	0.263	0.339	0.401	0.022	0	0.018	0	0.19	0.168	0.012	0.141	0.633	0.071	0.331	0.28	0.05	0.303	0.626	0.07
FBgn0032698	CG10336		protein_coding	-0.6826	2.954e-06	-0.02956	0.8987	0.009179	0.969	-0.07498	0.7212	17.103	16.545	17.067	15.115	29.105	26.304	27.784	27.809	23.662	22.742	30.72	20.047	21.977	29.923	21.828	27.309	29.137	22.778	22.855	25.198
FBgn0035968	Slc45-1	SLC45A2	protein_coding	2.229	2.958e-06	-0.001247	1	-0.04866	0.7343	-0.2223	0.2606	6.472	8.365	27.128	35.075	2.694	3.943	4.064	3.775	8.334	10.348	3.888	9.923	8.654	3.704	7.548	6.2	2.696	5.541	5.326	1.013
FBgn0266768	CR45233		ncRNA	-1.654	2.958e-06	-0.1204	0.3241	-0.4226	0.07459	-0.1571	0.4108	1.024	0.517	0.766	0.971	3.26	2.867	2.503	2.213	2.455	3.002	3.353	0	3.776	1.202	1.558	1.057	1.396	1.372	3.146	1.679
FBgn0260985	RfC4	RFC2	protein_coding	-0.5673	2.959e-06	-0.1882	0.09553	-0.2046	0.1233	-0.1653	0.2894	93.605	107.408	97.997	83.505	159.372	146.069	142.376	142.801	149.625	120.204	128.122	89.072	107.668	106.117	97.501	109.201	105.055	96.604	87.262	151.668
FBgn0026207	mbo	NUP88	protein_coding	-0.3145	2.994e-06	-0.00575	0.9851	-0.04089	0.7242	-0.2874	0.001026	37.296	37.618	40.009	37.826	42.806	49.91	49.477	50.428	49.519	51.002	56.592	53.445	54.05	49.242	47.84	54.724	47.781	44.607	44.442	38.197
FBgn0052344	CG32344	DDX54	protein_coding	-0.5931	3.004e-06	-0.1772	0.1237	-0.1325	0.35	-0.1825	0.2483	20.101	25.817	19.569	19.669	34.41	40.267	29.255	30.232	30.147	29.461	25.007	21.268	22.757	20.249	27.933	21.425	21.467	21.145	22.961	25.728
FBgn0016685	Nlp		protein_coding	-0.4245	3.004e-06	-0.2357	0.01503	-0.1776	0.132	-0.4657	1.469e-05	290.829	262.795	219.434	213.925	333.615	287.343	386.563	351.873	404.786	412.41	367.43	284.565	316.067	318.679	335.621	341.519	317.185	273.092	270.394	274.185
FBgn0250837	dUTPase	DUT	protein_coding	-0.7543	3.054e-06	-0.08166	0.5547	-0.1017	0.5127	-0.4257	0.01018	263.388	209.707	268.727	232.157	428.053	315.045	509.41	482.139	416.949	425.689	502.771	336.801	383.098	393.638	355.61	388.626	383.012	260.376	240.287	373.153
FBgn0004666	sim		protein_coding	2.278	3.062e-06	0.006946	0.9743	0.1344	0.373	-0.01254	0.9571	0.6	0.198	0.168	0.177	0.083	0.035	0.034	0.042	0	0.026	0.145	0.174	0.065	0.044	0.051	0.104	0.271	0	0.074	0.086
FBgn0267428	CG45781		protein_coding	3.977	3.066e-06	0.01278	0.9542	-0.009539	0.9595	0.6569	0.07506	0.796	0.672	0.101	0.204	0.013	0.038	0.016	0.015	0	0.037	0.021	0.063	0.047	0	0	0	0.03	0.216	0	0.323
FBgn0054046	CR34046		ncRNA	4.811	3.116e-06	0.1316	0.4141	0.6889	0.08285	0.8036	0.05558	3.26	2.936	3.236	3.535	0.074	0.139	0	0.083	0	0.207	0	1.391	0	0.175	0.408	1.109	1.497	0.6	2.062	0.413
FBgn0034689	CG2921	ARMT1	protein_coding	-0.63	3.165e-06	0.1434	0.2276	-0.005222	0.9874	0.02142	0.9329	11.463	11.241	12.783	11.283	18.455	16.542	20.368	20.533	17.598	18.831	13.794	24.95	24.192	15.62	18.053	16.954	14.8	13.668	19.899	16.902
FBgn0278600	CG46270		protein_coding	6.065	3.2e-06	0.2348	0.2616	1.37	0.03153	0.9106	0.04458	2.661	4.179	3.269	2.834	0	0	0	0	0.413	0	0	2.145	0.803	0.809	4.407	2.991	2.565	3.697	3.179	0.212
FBgn0001224	Hsp23		protein_coding	1.752	3.274e-06	0.1745	0.2203	0.05575	0.7083	0.3068	0.1383	534.557	159.68	525.245	421.366	53.395	32.715	184.716	173.147	119.491	120.058	114.664	214.71	253.33	224.688	112.201	151.192	199.772	175.253	179.153	308.519
FBgn0001981	esg		protein_coding	-1.074	3.275e-06	-0.1954	0.138	-0.4257	0.03122	-0.8336	0.001381	31.39	32.187	45.668	55.131	121.027	71.867	86.861	91.885	50.82	43.941	39.557	31.73	32.264	19.761	28.559	27.343	19.724	24.125	25.948	14.401
FBgn0040395	Unc-76	FEZ1,FEZ2	protein_coding	-0.5985	3.313e-06	-0.05953	0.7154	-0.04402	0.7972	-0.1616	0.3176	16.11	19.208	16.379	15.956	26.665	29.826	24.368	26.209	27.155	27.46	30.125	24.546	23.157	28.078	25.676	24.578	28.815	25.28	24.489	22.364
FBgn0019643	Dat		protein_coding	-1.736	3.323e-06	-0.09903	0.3996	-0.6479	0.04479	-0.1218	0.5284	0.135	0.611	0.578	0.466	2.097	1.228	1.608	1.872	1.01	1.511	1.034	0.982	0.552	0.535	0.673	0.391	0.313	0.705	1.663	0.291
FBgn0003965	v	TDO2	protein_coding	5.459	3.356e-06	0.002366	0.9956	0.07542	0.5911	0.1163	0.5295	1.044	0.5	0.342	0.674	0.025	0	0	0	0.183	0.846	0	0.473	0.62	0	0.417	1.415	0.226	0.816	1.002	0.234
FBgn0035523	Ctl1		protein_coding	0.5143	3.411e-06	0.1858	0.0934	0.2574	0.03877	0.583	8.787e-06	46.047	58.351	57.976	56.85	36.696	37.345	35.659	38.386	37.924	38.015	36.318	45.58	41.535	56.649	45.277	45.477	56.308	55.229	51.585	72.118
FBgn0025885	Inos	ISYNA1	protein_coding	-1.616	3.612e-06	-0.04888	0.6907	-0.4364	0.06205	-1.14	0.002962	27.61	41.787	52.342	46.944	109.084	56.287	215.553	183.197	166.698	143.695	141.688	96.115	111.713	123.372	56.79	47.902	105.694	26.807	26.932	109.037
FBgn0039150	CG13605		protein_coding	0.306	3.68e-06	0.07127	0.5824	-0.04054	0.744	0.1221	0.2697	30.509	28.302	29.446	31.795	24.646	22.526	25.012	23.649	24.431	24.325	21.99	23.23	28.945	23.985	22.52	22.701	21.981	24.978	24.784	27.191
FBgn0259683	Ir40a		protein_coding	2.448	3.699e-06	0.02667	0.8472	-0.008222	0.9639	0.3023	0.1715	84.109	82.096	40.117	34.94	10.19	15.881	5.353	6.645	12.7	10.553	10.935	16.471	14.093	15.946	9.363	8.432	14.184	7.816	7.636	63.273
FBgn0030793	CG9125		protein_coding	0.4726	3.707e-06	0.08312	0.564	0.2245	0.07316	0.09418	0.5804	32.161	29.015	28.409	29.006	21.487	18.692	22.284	20.187	19.355	21.452	21.753	18.709	25.154	26.722	25.105	27.133	27.399	22.233	21.058	24.813
FBgn0028426	JhI-1	ELAC2	protein_coding	-0.5897	3.718e-06	-0.02028	0.9425	-0.1065	0.4735	0.1304	0.4448	17.928	21.025	20.885	19.644	31.502	38.259	27.276	27.993	28.331	27.553	21.378	27.156	25.083	21.989	21.234	22.186	22.674	29.402	27.102	31.425
FBgn0032704	Jwa	PRAF2	protein_coding	0.3264	3.719e-06	-0.01641	0.9502	0.004376	0.9826	0.2822	0.002048	136.05	140.131	138.464	140.402	109.063	104.598	110.85	111.803	110.791	102.836	108.72	105.818	105.473	104.571	107.293	107.334	109.291	114.082	119.014	162.848
FBgn0032511	ND-B22	NDUFB9	protein_coding	0.4134	3.756e-06	-0.06932	0.6416	-0.1014	0.4305	-0.1559	0.2253	161.294	142.086	128.791	124.339	102.45	89.25	108.461	106.858	130.025	119.738	108.416	109.578	115.806	100.817	103.883	120.103	95.568	102.992	115.613	94.442
FBgn0033651	Ir48c		protein_coding	2.171	3.779e-06	0.04174	0.718	0.7899	0.04017	0.6948	0.04112	2.424	1.695	2.116	2.123	0.485	0.458	0.312	0.371	0.424	0.764	0.213	1.374	0.549	0.323	1.183	1.971	1.402	0.947	2.017	1.159
FBgn0005536	Mbs		protein_coding	-0.3678	3.839e-06	-0.04509	0.7889	-0.1703	0.1233	-0.01548	0.9356	17.396	18.966	19.001	19.124	22.747	23.76	25.146	26.451	19.871	21.267	18.71	18.579	18.441	19.425	17.395	14.695	18.851	21.986	18.819	18.586
FBgn0053978	CG33978		protein_coding	-2.036	3.881e-06	0.0253	0.864	0.0576	0.6898	0.1024	0.6023	0.151	0.167	0.182	0.258	0.849	0.798	0.904	0.935	0.859	1.08	0.795	1.66	0.99	0.803	1.244	1.759	0.794	1.506	1.591	0.704
FBgn0029924	CG4586		protein_coding	-2.456	3.899e-06	-0.03548	0.7778	-0.09444	0.4938	-0.2251	0.2517	0.114	0.246	0.066	0.084	1.022	0.331	0.957	1.019	3.243	3.079	0.94	1.103	2.634	1.492	1.052	1.593	1.715	2.139	0.292	1.581
FBgn0037538	CG3223		protein_coding	0.3747	4.084e-06	0.01419	0.9636	0.1033	0.4102	0.303	0.004921	42.229	37.137	41.457	42.53	28.27	29.319	32.818	32.944	27.371	35.662	29.47	31.759	30.318	32.274	30.83	35.813	36.136	36.315	37.88	43.01
FBgn0039004	Nup133	NUP133	protein_coding	-0.3436	4.112e-06	0.01552	0.9562	-0.004487	0.9827	-0.09951	0.4107	29.784	31.947	35.023	32.951	35.237	42.333	44.664	45.388	39.876	43.01	40.796	44.862	42.041	39.498	44.871	41.703	36.93	39.907	39.003	35.658
FBgn0032420	CG6583		protein_coding	0.6818	4.126e-06	0.2816	0.03259	0.08692	0.5868	0.3415	0.03419	42.612	28.841	36.733	34.938	22.509	20.396	20.777	20.927	21.127	14.169	21.383	25.956	27.217	31.49	23.195	17.926	24.827	31.068	21.369	29.251
FBgn0037137	Nopp140		protein_coding	-0.7247	4.283e-06	-0.1099	0.3809	-0.2542	0.07272	-0.4182	0.01032	82.641	77.653	76.775	72.087	122.158	134.353	143.118	139.752	183.457	181.717	99.393	131.501	135.752	99.925	119.388	114.502	94.838	115.964	110.101	79.736
FBgn0033934	CG17385		protein_coding	0.273	4.284e-06	0.1696	0.04328	0.2375	0.003798	0.1691	0.05987	52.842	53.852	50.564	49.636	43.955	39.568	43.93	42.225	36.697	41.542	39.378	42.172	49.503	45.585	47.166	48.285	47.433	41.229	44.039	47.424
FBgn0050463	CG30463		protein_coding	-0.8348	4.292e-06	-0.1838	0.1308	-0.2871	0.05708	-0.8982	4.798e-05	23.418	25.586	41.029	42.592	55.872	44.783	73.483	77.508	62.813	69.131	52.435	45.994	43.133	37.345	48.534	37.722	35.725	32.592	37.298	21.21
FBgn0053100	eIF4EHP		protein_coding	0.69	4.344e-06	0.2073	0.08272	0.2749	0.0508	0.2372	0.1451	39.839	27.854	28.765	32.585	21.727	18.602	17.304	18.264	18.054	17.282	15.658	28.298	23.322	20.341	22.772	28.035	21.727	24.097	26.673	15.367
FBgn0034237	eIF3b	EIF3B	protein_coding	-0.3085	4.393e-06	-0.03873	0.8053	-0.04297	0.7019	-0.02229	0.8815	227.463	259.062	227.29	224.303	275.074	307.335	300.148	294.516	300.071	303.955	258.353	265.975	273.183	285.165	280.44	259.31	281.366	284.95	272.428	289.425
FBgn0083124	Uhg4		ncRNA	-0.8727	4.403e-06	-0.04119	0.8178	-0.02166	0.9185	-0.08279	0.7053	38.497	31.353	26.54	26.724	78.745	59.843	51.17	49.695	43.172	49.449	54.173	36.801	37.93	53.969	45.055	42.36	52.198	51.503	34.625	45.894
FBgn0262509	nrm		protein_coding	-1.289	4.459e-06	-0.07742	0.5079	-0.07977	0.5958	-0.2083	0.2709	0.394	0.408	0.548	0.795	1.467	1.013	1.481	1.724	1.916	1.877	1.198	1.335	1.314	0.883	1.386	1.25	1.203	1.124	1.052	1.216
FBgn0010316	dap		protein_coding	-0.6879	4.605e-06	-0.003303	0.9977	0.004677	0.9898	-0.1537	0.3809	23.827	28.898	26.204	29.729	48.199	49.777	43.033	43.465	44.481	48.711	61.396	46.453	44.944	62.014	48.736	45.726	61.423	45.452	43.007	42.048
FBgn0004913	Gnf1	RFC1	protein_coding	-0.3592	4.65e-06	-0.05027	0.7461	-0.05118	0.6928	-0.09091	0.4831	42.572	44.386	52.863	50.375	58.757	57.793	66.384	65.984	64.236	62.164	58.83	59.011	55.646	59.291	59.205	57.25	57.955	57.889	56.321	57.524
FBgn0035557	CG11353		protein_coding	-2.136	4.754e-06	-0.0458	0.6938	-0.0145	0.9354	-0.26	0.2066	1.394	2.125	1.113	1.491	11.351	11.069	3.793	4.336	6.461	5.078	4.764	5.503	3.973	1.347	6.578	6.637	1.636	2.991	2.729	2.411
FBgn0036298	nst	PGM3	protein_coding	0.4581	4.885e-06	0.1356	0.2486	0.09486	0.4989	0.1148	0.4554	36.849	27.441	35.485	32.189	20.782	19.644	26.844	25.772	27.906	29.111	22.526	31.631	31.309	32.008	32.856	27.33	29.081	25.749	28.626	32.67
FBgn0000071	Ama		protein_coding	-0.6853	4.895e-06	-0.1204	0.331	-0.1078	0.4769	-0.3513	0.02534	121.722	103.459	133.75	138.115	199.775	139.609	248.155	254.629	191.42	191.971	195.791	143.247	135.468	176.902	155.236	154.628	176.754	128.582	130.038	146.394
FBgn0033890	Ctf4		protein_coding	-0.6466	4.96e-06	-0.05321	0.7544	-0.07572	0.6418	-0.3906	0.01116	18.319	19.406	25.612	21.26	32.744	27.04	41.512	38.023	34.324	30.926	34.829	25.234	30.797	33.308	33.125	26.021	29.509	17.2	22.475	27.993
FBgn0040383	CG5254		protein_coding	1.834	5.004e-06	0.02304	0.8824	0.003137	0.9928	0.2905	0.1608	21.602	24.521	6.271	5.782	3.187	7.472	2.38	1.64	4.953	3.224	6.56	6.332	5.498	6.187	3.34	4.826	6.758	10.439	8.625	9.434
FBgn0053051	CG33051		protein_coding	-0.7652	5.064e-06	-0.05419	0.7307	-0.1958	0.1694	-0.1962	0.2698	14.21	10.601	10.957	12.399	24.567	18.048	22.227	21.396	18.882	21.617	24.639	15.465	22.845	18.265	15.888	15.576	16.025	16.66	12.914	20.979
FBgn0025814	Mgstl	PTGES,MGST1	protein_coding	-0.9763	5.183e-06	-0.1596	0.1891	-0.4368	0.02436	-1.032	0.0001292	12.451	10.894	10.932	10.667	19.411	14.417	32.216	28.807	32.414	23.789	32.988	15.013	18.578	25.29	11.802	15.189	23.475	10.126	11.165	17.551
FBgn0030683	CG8239	MVD	protein_coding	-0.7697	5.201e-06	-0.03916	0.8409	-0.09214	0.5587	-0.05421	0.818	3.936	4.319	6.414	5.621	7.672	6.721	11.32	11.211	11.996	11.144	11.769	10.596	10.582	10.323	6.971	11.618	10.459	12.176	8.337	12.154
FBgn0030510	CG12177		protein_coding	-1.968	5.272e-06	-0.4706	0.07346	-0.7724	0.03192	-0.4834	0.0638	0.402	0.5	0.234	0.066	1.852	1.167	1.252	0.984	2.685	1.688	1.346	1.458	0.546	0.326	0.666	1.033	0.349	1.117	0.754	0.672
FBgn0010520	Bka	FCF1	protein_coding	-0.4601	5.273e-06	-0.1734	0.1241	-0.1053	0.4575	-0.2822	0.03839	16.849	20.111	19.806	19.547	32.797	29.226	23.592	23.111	25.451	25.601	26.149	18.948	18.923	22.349	19.616	22.081	24.75	16.856	20.186	21.027
FBgn0003483	spn-E	TDRD9	protein_coding	0.8028	5.301e-06	0.09603	0.447	0.1049	0.4956	0.08864	0.6746	166.429	159.953	211.973	212.732	84.845	107.427	107.77	105.089	134.234	145.581	92.193	183.489	170.345	119.205	177.644	155.087	121.036	161.092	168.322	87.425
FBgn0263241	Mocs1	MOCS1	protein_coding	-0.7915	5.357e-06	-0.1001	0.4211	-0.1848	0.1951	0.2662	0.1185	8.589	9.013	9.91	8.601	22.234	21.097	10.337	12.711	18.047	15.193	10.338	12.858	11.058	9.893	11.662	10.518	9.631	18.762	17.053	23.217
FBgn0031920	CG6441		protein_coding	2.562	5.422e-06	0.2516	0.2041	1.031	0.03469	1.321	0.01469	2.794	2.529	2.985	3.443	0.785	0.166	0.317	0.415	0.117	0.36	0.101	0.303	0.963	0.647	1.243	0.964	0.651	0.261	0.384	2.093
FBgn0264491	how		protein_coding	0.9176	5.509e-06	0.228	0.09066	0.1772	0.2155	0.5572	0.005585	74.045	64.431	71.156	77.916	35.701	35.15	36.091	35.254	39.711	45.55	30.692	76.065	62.931	42.949	60.858	57.809	44.336	82.746	80.174	42.325
FBgn0000036	nAChRalpha1		protein_coding	1.966	5.524e-06	0.004422	0.9868	-0.009789	0.9595	-0.08188	0.6858	26.021	17.412	11.952	14.239	4.263	3.46	4.106	4.068	5.551	7.823	3.427	7.717	7.668	2.149	5.887	6.975	2.961	5.6	5.681	1.65
FBgn0039328	CHKov2		protein_coding	2.092	5.531e-06	1.178	0.0152	0.3945	0.1002	1.084	0.01116	10.687	8.991	6.219	6.668	2.256	2.621	0.698	1.142	5.995	4.567	1.877	18.639	18.588	6.377	10.129	14.174	7.029	13.952	12.988	13.435
FBgn0085273	CG34244		protein_coding	5.214	5.54e-06	2.26	0.01511	2.117	0.01409	0.4624	0.1202	1.335	1.391	0.956	1.666	0.039	0	0.049	0	0	0	0.062	0.931	1.535	0.656	0.219	1.781	0.802	1.284	0	0.147
FBgn0032701	CG10341		protein_coding	-0.6027	5.589e-06	-0.08867	0.525	-0.118	0.4237	-0.06548	0.7552	15.592	15.528	16.587	15.721	25.707	26.724	24.538	23.952	25.814	22.292	17.793	18.058	21.492	15.89	17.523	17.15	20.19	16.77	19.271	24.062
FBgn0013467	igl		protein_coding	6.014	5.624e-06	0.02007	0.899	0.1094	0.4776	0.138	0.4657	0.765	0.243	0.086	0.217	0	0	0	0	0.494	0.477	0.035	0.694	0.879	0	1.441	1.488	0.281	1.38	1.31	0.063
FBgn0266739	CR45212		ncRNA	-1.059	5.628e-06	-0.4454	0.03418	-0.4255	0.03621	-1.359	4.772e-05	7.46	11.059	13.173	10.053	25.595	27.537	21.268	20.347	21.587	23.339	31.802	18.663	11.532	11.973	11.504	13.385	16.736	4.021	11.458	10.332
FBgn0014011	Rac2	RAC2	protein_coding	0.6884	5.73e-06	0.1172	0.3461	0.07463	0.6521	0.3279	0.03846	183.888	136.54	188.646	201.658	102.71	112.484	98.372	104.514	96.682	104.16	91.05	126.716	127.198	116.612	114.514	103.867	113.419	160.328	161.358	89.302
FBgn0037315	Cerk		protein_coding	0.8552	5.738e-06	0.0688	0.6209	0.1691	0.2365	0.4448	0.01644	6.248	4.942	7.026	5.786	2.609	2.147	3.901	3.809	4.812	3.651	4.114	4.982	4.018	6.363	5.271	5.279	6.65	5.284	4.96	9.763
FBgn0034068	casp	FAF1	protein_coding	0.4458	5.97e-06	0.1026	0.4272	0.01283	0.9473	0.1983	0.1244	80.649	71.208	86.435	85.263	56.336	59.655	56.276	58.076	65.648	66.777	57.36	83.895	73.281	61.121	67.564	59.087	66.372	69.043	67.14	88.659
FBgn0044452	Atg2	ATG2B,ATG2A	protein_coding	0.4126	6.072e-06	0.06378	0.6795	0.09111	0.4858	0.08533	0.569	50.127	54.242	58.499	61.149	36.271	45.345	41.291	41.02	40.234	39.746	43.802	42.417	42.016	50.351	47.864	38.103	51.346	43.841	48.963	40.68
FBgn0259111	Ndae1		protein_coding	2.853	6.097e-06	0.1455	0.3076	0.1097	0.4365	0.2958	0.1797	0.169	0.156	0.183	0.196	0.023	0.009	0.029	0.021	0.287	0.313	0.036	0.854	0.394	0.242	0.334	0.628	0.23	0.792	0.556	0.156
FBgn0053523	CG33523		protein_coding	0.3766	6.186e-06	0.01587	0.9578	0.04377	0.7586	0.2893	0.007704	27.224	22.585	26.739	26.685	20.204	17.854	19.028	20.64	19	20.136	19.963	20.625	20.387	19.558	22.295	21.019	19.467	25.038	25.106	24.917
FBgn0032059	PrBP	PDE6D	protein_coding	0.4425	6.248e-06	0.01502	0.9636	0.1274	0.3359	0.02262	0.9157	49.899	37.575	40.015	39.066	31.642	28.443	30.495	27.902	37.523	32.144	32.767	38.166	32.772	33.951	35.369	46.056	36.702	32.187	38.09	33.579
FBgn0039233	CG7006	NIP7	protein_coding	-0.5935	6.264e-06	-0.2464	0.03696	-0.2499	0.06332	-0.4637	0.002056	49.787	42	44.229	42.032	69.764	64.151	74.859	72.253	95.875	75.082	65.999	57.369	56.693	53.562	62.491	57.363	54.873	46.245	51.535	55.462
FBgn0036733	U4-U6-60K	PRPF4	protein_coding	-0.3904	6.306e-06	0.006622	0.9851	0.1352	0.2676	0.1024	0.4717	22.672	22.904	25.256	23.154	30.453	29.035	34.089	32.761	26.792	25.964	26.623	25.214	26.698	27.98	31.543	31.276	28.819	30.008	30.184	27.092
FBgn0025366	Ip259	NSA2	protein_coding	-0.5021	6.364e-06	-0.06907	0.6573	0.004563	0.9881	-0.2151	0.1206	190.865	199.042	170.729	175.153	300.551	253.372	258.975	268.864	230.666	230.565	262.59	199.876	200.859	247.553	227.531	258.318	242.921	234.724	215.29	146.735
FBgn0260658	CG42541		protein_coding	1.48	6.375e-06	0.153	0.2479	0.06531	0.6521	0.08455	0.6826	1.535	1.1	0.536	0.776	0.347	0.334	0.267	0.341	0.368	0.256	0.106	0.62	0.31	0.392	0.355	0.304	0.297	0.219	0.323	0.315
FBgn0036254	CG5645	KRI1	protein_coding	-0.6535	6.494e-06	-0.08094	0.5682	-0.1128	0.451	-0.2087	0.2101	12.097	11.6	11.191	10.178	21.008	24.166	14.326	15.029	15.184	14.373	13.936	11.646	12.979	11.918	12.551	11.253	12.458	10.182	12.244	11.88
FBgn0025456	CREG	CREG1	protein_coding	0.9118	6.746e-06	1.282	4.677e-06	1.061	0.0001922	1.245	5.061e-06	7.25	4.419	10.695	8.827	3.465	3.396	4.246	4.409	7.664	4.826	3.864	13.303	14.889	12.003	12.029	13.038	10.311	13.968	10.488	14.995
FBgn0036732	Oatp74D		protein_coding	0.6961	6.836e-06	0.001011	1	0.009239	0.969	-0.2663	0.1017	104.099	123.088	128.519	153.518	80.758	82.422	65.362	68.98	64.771	62.222	60.105	67.496	65.23	54.88	70.239	64.533	55.671	53.418	54.159	32.861
FBgn0036686	CG7728	BMS1	protein_coding	-0.5357	6.863e-06	-0.1265	0.3035	-0.1882	0.1546	-0.3514	0.01052	31.602	37.414	37.104	35.551	48.376	58.583	54.968	52.214	58.912	58.66	40.353	45.26	47.34	36.962	45.541	42.832	37.864	36.868	45.87	31.922
FBgn0259227	CG42327		protein_coding	-0.6462	6.901e-06	-0.07855	0.5856	-0.03139	0.8705	-0.05377	0.8107	6.561	8.299	8.468	8.453	11.984	14.81	12.318	13.304	11.885	14.042	10.592	10.229	8.789	11.907	12.992	9.329	12.25	13.547	12.603	8.541
FBgn0034160	CG5550		protein_coding	2.279	6.909e-06	0.03762	0.7512	0.09315	0.5047	0.3181	0.1657	9.259	7.431	7.448	8.367	0.837	2.503	1.38	1.059	0.508	0.686	1.15	1.317	0.37	2.071	1.546	1.837	1.26	2.838	1.673	1.823
FBgn0261588	pdm3		protein_coding	-0.5616	6.985e-06	-0.129	0.2941	-0.05817	0.7274	-0.01909	0.939	92.549	121.313	100.155	99.651	151.357	142.146	167.058	177.474	108.796	121.007	109.54	88.541	91.49	95.169	119.188	90.524	101.504	120.258	114.931	97.85
FBgn0034763	RYBP		protein_coding	0.3726	7.036e-06	0.1373	0.2199	-0.02822	0.8514	0.02301	0.9041	30.989	26.66	25.039	26.155	20.557	19.693	21.276	20.552	20.769	23.669	20.659	23.352	24.043	28.387	20.057	20.585	21.809	21.253	21.466	23.18
FBgn0022069	Nnp-1		protein_coding	-0.4564	7.083e-06	-0.08952	0.5139	-0.1651	0.1916	-0.1358	0.346	51.051	52.685	53.606	47.816	69.79	72.279	74.066	74.729	79.088	78.406	54.307	65.858	65.101	55.437	60.086	62.005	54.767	67.61	70.652	49.52
FBgn0037750	Whamy		protein_coding	1.702	7.083e-06	0.02371	0.8724	0.1759	0.265	0.05927	0.776	0.936	1.561	0.839	1.064	0.359	0.453	0.148	0.253	0.382	0.337	0.235	0.495	0.265	0.427	0.664	0.733	0.507	0.488	0.479	0.28
FBgn0035390	scramb2	PLSCR1	protein_coding	0.3788	7.094e-06	0.07387	0.5987	0.06332	0.6314	0.06127	0.6945	105.276	102.914	96.691	97.855	76.496	79.093	70.483	76.645	77.639	75.558	97.615	88.125	92.189	95.397	87.233	86.599	96.679	101.206	86.168	79.897
FBgn0028662	VhaPPA1-1	ATP6V0B	protein_coding	0.3456	7.151e-06	-0.01495	0.9582	0.1772	0.09538	0.09533	0.45	166.887	177.212	149.268	152.08	125.591	127.519	124.517	121.132	109.75	115.437	144.514	113.543	115.93	133.634	153.027	143.915	139.142	138.018	145.48	119.291
FBgn0032586	Tpr2		protein_coding	-0.269	7.326e-06	0.09805	0.3263	0.006151	0.9626	-0.09467	0.324	96.392	89.743	90.076	84.714	103.43	113.679	112.134	109.549	106.407	100.703	106.849	124.545	114.191	106.387	103.683	103.455	109.03	105.497	100.307	87.819
FBgn0034253	CG10936		protein_coding	1.318	7.335e-06	0.0391	0.7728	0.1405	0.3218	0.3045	0.1257	3.626	2.387	4.165	3.865	1.028	0.914	1.482	1.759	1.085	1.112	0.487	1.264	0.817	1.243	1.18	1.625	1.319	1.535	2.335	0.761
FBgn0028406	Drep4		protein_coding	0.5392	7.392e-06	0.1126	0.3779	0.08036	0.6072	0.2529	0.08621	18.052	14.113	17.963	19.63	11.6	12.655	10.972	10.718	14.595	11.142	14.07	17.919	14.931	15.462	12.421	18.466	13.767	21.707	14.443	15.822
FBgn0020621	Pkn		protein_coding	0.3523	7.401e-06	0.02955	0.884	-0.005355	0.9788	-0.05846	0.6883	25.862	29.429	29.288	29.855	20.622	24.656	20.807	21.9	23.594	27.634	27.472	27.994	27.55	26.325	28.324	24.254	25.782	26.837	27.564	21.066
FBgn0030073	CG10962	DHRS11	protein_coding	1.259	7.916e-06	0.03938	0.7637	0.1153	0.4124	0.5471	0.02922	9.672	4.155	6.09	6.255	2.985	2.618	1.959	2.399	0.776	2.141	3.012	1.869	2.693	3.256	3.883	2.979	2.751	2.726	5.479	4.435
FBgn0003721	Tm1		protein_coding	0.5144	7.934e-06	0.5315	0.000167	0.8184	3.382e-08	0.7043	3.318e-07	46.409	40.633	43.181	48.007	31.68	35.008	25.691	27.523	25.962	26.649	25.145	41.437	38.444	40.739	46.678	50.981	42.319	51.73	50.235	32.441
FBgn0026778	Rad1	RAD1	protein_coding	-0.5447	8.398e-06	-0.2194	0.05467	-0.1374	0.331	-0.145	0.3823	8.09	8.211	10.25	9.815	12.784	11.597	15.54	15.723	17.654	14.936	13.91	9.991	11.38	12.044	11.974	13.352	12.841	13.453	12.161	14.033
FBgn0085343	Sws1		protein_coding	-0.5447	8.398e-06	-0.2194	0.05467	-0.1374	0.331	-0.145	0.3823	8.09	8.211	10.25	9.815	12.784	11.597	15.54	15.723	17.654	14.936	13.91	9.991	11.38	12.044	11.974	13.352	12.841	13.453	12.161	14.033
FBgn0027094	AlaRS	AARS	protein_coding	-0.3457	8.42e-06	-0.06034	0.6773	-0.07904	0.5047	-0.004042	0.9884	109.607	117.914	113.664	106.934	137.545	148.52	147.367	146.673	143.926	133.437	112.518	120.488	133.786	108.353	124.486	122.808	110.958	132.974	129.465	125.98
FBgn0038088	CG10126	CAPSL	protein_coding	1.649	8.604e-06	0.0002002	1	-0.0903	0.5131	-0.002853	0.9968	10.012	3.025	3.648	4.75	2.375	1.358	1.282	1.091	1.826	1.693	1.05	1.895	1.656	1.033	0.742	1.007	0.906	0.272	1.337	2.185
FBgn0266210	CR44905		ncRNA	4.113	8.662e-06	0.07308	0.5921	0.1394	0.4087	0.1778	0.369	1.219	1.602	0.546	1.245	0.072	0.034	0	0.081	0.262	0	0	0.17	0.255	0.257	0.399	0.136	0.325	0.293	0.288	0.202
FBgn0032218	CG5381		protein_coding	0.9341	8.68e-06	-0.02222	0.9217	-0.09341	0.5421	-0.1322	0.5084	7.635	6.187	6.167	8.264	4.552	2.416	3.28	3.485	5.168	4.684	4.439	4.985	4.232	3.958	4.488	2.913	3.947	4.296	4.034	3.417
FBgn0263391	hts		protein_coding	-0.543	8.797e-06	0.01748	0.9565	-0.005038	0.9874	0.009456	0.9727	33.822	36.186	46.758	46.802	56.237	49.352	67.144	76.134	48.668	52.959	44.477	51.484	50.255	49.13	53.843	42.391	48.75	54.615	55.367	37.685
FBgn0050383	CG30383		protein_coding	-0.8992	8.797e-06	-0.01282	0.9653	-0.1748	0.2214	-0.1826	0.3247	9.255	6.022	9.797	6.239	16.863	11.387	17.591	16.725	20.094	22.945	21.103	22.222	20.596	18.824	11.262	16.435	17.356	13.502	14.486	20.735
FBgn0038673	CG14286		protein_coding	-0.485	9.038e-06	-0.02868	0.904	-0.1818	0.1675	-0.1697	0.2613	16.09	17.176	18.467	16.725	25.456	21.733	27.238	25.453	30.475	32.346	27.224	26.55	29.45	28.962	27.603	25.68	20.452	22.008	21.796	29.813
FBgn0031436	ND-B17.2	NDUFA12	protein_coding	0.3814	9.285e-06	-0.07572	0.5939	-0.1717	0.144	-0.2356	0.04102	119.062	96.8	96.122	90.019	72.516	70.815	82.076	75.513	105.277	100.626	95.833	91.651	95.316	86.614	85.592	93.184	76.479	78.804	77.253	89.061
FBgn0259143	CG42258		protein_coding	0.5382	9.311e-06	0.1644	0.1544	0.1322	0.3471	0.3317	0.01883	10.748	9.646	8.399	9.495	6.496	7.043	5.594	6.061	9.506	8.889	9.729	10.694	11.375	13.92	8.502	11.422	13.266	15.937	11.855	11.174
FBgn0011672	Mvl		protein_coding	0.4867	9.4e-06	0.1546	0.1821	0.3798	0.002426	0.3076	0.02252	6.906	7.53	9.748	9.917	5.468	6.779	5.388	5.846	6.791	6.417	6.202	9.134	7.641	7.514	9.729	9.655	8.659	9.899	9.055	7.083
FBgn0033087	Hsepi	GLCE	protein_coding	0.458	9.615e-06	0.1159	0.3594	0.2671	0.02912	0.2638	0.048	14.888	14.63	15.348	17.72	10.304	12.717	10.214	10.785	11.113	10.962	11.282	12.996	13.219	13.282	16.446	14.87	13.035	17.084	15.801	10.638
FBgn0044510	mRpS5	MRPS5	protein_coding	-0.6425	9.903e-06	0.05698	0.7262	-0.02629	0.8961	0.07242	0.7286	18.628	17.321	26.836	28.33	32.244	44.013	35.383	38.444	39.578	47.187	45.671	57.937	48.759	43.428	41.72	46.901	38.071	47.952	54.814	41.281
FBgn0266720	Snap24	SNAP25,SNAP23	protein_coding	0.3807	1.002e-05	0.109	0.3721	0.1143	0.3536	0.215	0.06325	80.808	67.149	79.798	87.814	58.067	51.835	63.975	62.839	54.383	53.208	53.658	67.096	58.714	58.555	61.097	62.602	58.535	71.523	69.781	53.658
FBgn0014869	Pglym78		protein_coding	0.4516	1.012e-05	-0.08891	0.5241	-0.2471	0.04222	-0.348	0.005869	75.4	81.485	87.364	79.915	54.94	51.894	64.427	58.346	73.486	67.114	58.31	53.7	69.852	50.689	45.651	55.251	52.209	48.739	40.638	56.23
FBgn0003345	sd	TEAD1,TEAD3,TEAD2,TEAD4	protein_coding	0.6916	1.019e-05	0.04928	0.7755	0.06324	0.7136	0.2569	0.1167	56.607	44.482	41.923	45.321	30.173	29.833	24.217	25.895	27.075	28.17	23.472	32.575	27.843	28.057	30.717	28.458	29.035	41.42	36.67	26.521
FBgn0262656	Myc		protein_coding	-0.8698	1.03e-05	-0.2153	0.0984	-0.1908	0.1839	-0.3266	0.06621	45.877	43.435	24.855	27.571	84.744	85.525	55.971	51.548	55.128	56.645	73.372	35.856	30.274	53.82	36.977	34.277	59.112	41.917	35.753	46.271
FBgn0028292	ric8a	RIC8B,RIC8A	protein_coding	0.4294	1.03e-05	0.04337	0.8239	0.1628	0.1992	0.1252	0.3973	24.196	20.396	25.658	25.007	15.628	16.26	18.935	17.819	16.961	16.133	18.015	17.836	19.513	17.373	19.048	21.506	20.417	19.359	22.237	16.203
FBgn0032693	Cyp310a1		protein_coding	1.985	1.03e-05	0.01858	0.9064	0.1321	0.3616	-0.05453	0.795	0.976	1.996	4.244	3.029	0.454	0.466	0.61	0.777	1.006	1.331	0.65	1.025	1.535	1.031	2.078	2.45	1.114	0.642	0.868	0.81
FBgn0030797	CG13004		protein_coding	0.7652	1.069e-05	0.06249	0.6773	0.1712	0.2282	0.03369	0.8944	26.674	23.962	29.741	31.181	17.749	14.803	14.585	14.481	10.794	12.793	20.57	16.321	13.867	22.332	17.269	19.226	23.077	12.009	13.548	20.28
FBgn0032520	CG10859		protein_coding	-1.911	1.086e-05	-0.2336	0.1721	-1.54	0.003402	-0.9064	0.01515	1.233	0.341	0.404	0.512	2.769	1.063	3.498	2.916	8.033	4.372	3.766	2.587	2.461	2.181	0.493	1.449	2.24	1.085	2.427	1.935
FBgn0037955	CG6950	KYAT3	protein_coding	-0.4193	1.086e-05	-0.09391	0.4818	-0.03234	0.8343	-0.09358	0.5445	28.548	29.209	24.814	25.307	38.316	37.743	35.231	37.078	39.547	36.974	40.684	32.817	36.19	34.228	40.467	38.57	33.834	31.409	28.348	46.103
FBgn0266446	CG45076		protein_coding	1.624	1.143e-05	0.04167	0.7468	0.1476	0.3024	0.437	0.05645	1.425	1.004	0.296	0.375	0.205	0.194	0.266	0.231	1.957	1.814	2.286	2.169	2.903	2.786	2.438	4.265	3.134	5.17	4.376	2.646
FBgn0015808	ScpX	SCP2	protein_coding	0.4595	1.166e-05	0.06405	0.6904	0.2394	0.05231	0.1415	0.346	57.787	54.672	52.416	53.247	38.599	38.658	37.644	38.268	29.408	25.056	39.268	38.302	29.609	36.44	42.37	40.065	39.107	41.137	35.073	32.496
FBgn0037717	CG8301		protein_coding	-1.544	1.179e-05	-0.06525	0.5725	-0.1189	0.3976	-0.1984	0.2975	0.743	0.6	0.432	0.365	2.675	0.889	1.543	1.701	2.348	2.675	1.012	1.747	1.795	0.578	1.582	1.352	0.931	1.721	1.014	1.165
FBgn0035719	tow		protein_coding	1.792	1.184e-05	0.04686	0.6889	0.2088	0.2143	0.733	0.02896	4.913	4.866	3.936	4.352	0.98	1.308	1.107	1.269	0.669	0.758	0.423	1.273	1.083	0.466	1.291	1.798	0.803	2.593	2.303	0.435
FBgn0266259	CG44954		protein_coding	1.814	1.185e-05	0.1016	0.4003	0.1004	0.4661	1.784	0.0007567	6.948	5.131	4.557	5.205	1.483	1.641	1.101	1.287	0.463	2.263	1.596	3.201	2.248	3.12	2.349	3.188	2.105	9.655	8.301	1.978
FBgn0032507	CG9377		protein_coding	3.314	1.189e-05	0.1662	0.3323	0.2514	0.2331	0.6778	0.07017	6.72	7.915	2.08	2.688	0.659	0.363	0.238	0.247	0.1	0	0.172	0.13	0.68	0.587	0.152	0.62	0.682	1.565	0.549	0.256
FBgn0040382	CG5273		protein_coding	0.5129	1.19e-05	0.03849	0.8543	0.107	0.4627	0.2272	0.1208	21.043	29.84	25.667	22.559	16.765	14.075	17.323	18.678	17.757	18.872	15.267	17.042	19.358	18.958	19.183	20.427	20.14	19.664	17.234	26.649
FBgn0031875	CG3430	MCMBP	protein_coding	-0.4387	1.193e-05	-0.03207	0.8846	0.01887	0.9179	-0.2281	0.0784	22.095	23.179	31.743	26.984	33.887	33.152	38.818	40.067	37.241	44.982	40.184	35.615	39.281	41.434	41.632	41.481	42.564	31.166	31.286	36.864
FBgn0032873	CG2614	EEF1AKNMT	protein_coding	-0.2998	1.193e-05	-0.04048	0.805	-0.05182	0.66	-0.1047	0.3568	25.323	21.545	24.929	22.977	28.691	28.6	30.155	30.576	29.586	32.062	31.253	28.398	30.592	29.582	25.915	32	29.366	29.155	29.987	26.972
FBgn0034939	thoc5	THOC5	protein_coding	-0.4807	1.193e-05	0.0479	0.7961	-0.02182	0.9064	0.1495	0.3216	21.631	22.005	29.632	27.118	34.462	32.4	38.609	40.202	32.537	28.698	37.799	34.606	34.958	37.728	32.523	28.364	35.133	40.681	32.068	41.622
FBgn0031307	MFS3		protein_coding	-2	1.222e-05	-0.07928	0.4891	-0.8168	0.03209	-0.8458	0.0216	9.777	13.865	14.09	12.686	73.127	15.959	70.428	70.014	50.652	35.083	11.54	23.672	23.773	7.124	11.618	12.738	7.39	7.74	8.766	15.922
FBgn0040009	CG17490		protein_coding	-0.477	1.223e-05	-0.111	0.3846	-0.06638	0.6725	-0.5195	9.735e-05	10.062	13.665	13.674	15.145	18.282	22.198	17.719	17.909	18.503	18.796	18.723	15.836	14.354	17.125	16.765	15.186	19.023	10.64	11.728	13.373
FBgn0040075	rept	RUVBL2	protein_coding	-0.4205	1.245e-05	-0.1261	0.2925	-0.3357	0.002243	-0.4424	0.0001095	73.996	78.669	81.788	72.455	93.055	92.046	123.224	115.039	135.955	122.642	92.237	98.659	109.668	89.9	85.854	87.094	83.738	78.415	81.33	83.848
FBgn0027617	CG5808	PPIL4	protein_coding	-0.547	1.265e-05	-0.0689	0.6573	-0.02042	0.9217	-0.01464	0.9535	12.753	11.438	9.822	9.895	19.261	16.636	14.991	15.996	12.241	15.666	15.005	10.13	12.626	14.682	12.603	14.819	14.099	15.896	11.714	15.035
FBgn0250819	CG33521		protein_coding	1.212	1.309e-05	-0.008823	0.974	-0.05938	0.7083	0.06921	0.7616	4.954	3.417	4.364	3.713	1.745	1.639	1.418	1.692	3.56	2.956	2.872	2.879	3.644	2.423	2.565	2.611	2.422	3.679	4.414	2.768
FBgn0031832	CG9596	TRMT6	protein_coding	-0.4857	1.309e-05	-0.07831	0.597	-0.02544	0.8911	-0.1623	0.2867	14.463	13.398	14.528	13.773	21.695	20.123	20.704	19.147	16.976	19.587	22.004	17.204	14.317	20.099	19.038	18.647	19.009	13.747	18.587	17.359
FBgn0263133	mEFG1	GFM1	protein_coding	-0.4915	1.312e-05	-0.1082	0.4031	-0.2019	0.1207	-0.3089	0.02215	20.954	20.775	29.377	30.225	36.134	33.687	38.551	39.949	36.159	34.024	37.501	27.457	31.749	31.823	26.659	29.846	29.007	30.309	28.475	23.276
FBgn0261041	stj		protein_coding	-1.79	1.312e-05	-0.06928	0.5402	-0.2058	0.2105	-0.2604	0.1961	0.869	2.782	0.6	0.821	6.513	6.846	2.864	3.473	4.841	3.812	2.669	2.413	2.748	1.821	2.081	2.354	1.26	2.504	1.814	1.772
FBgn0259245	DIP-beta		protein_coding	1.957	1.316e-05	0.1109	0.3752	0.03269	0.8222	0.1288	0.4933	1.87	0.959	0.891	1.165	0.378	0.31	0.184	0.23	0.519	0.331	0.204	0.848	0.876	0.368	0.721	0.396	0.224	0.403	0.817	0.382
FBgn0284222	CG46306		protein_coding	0.7628	1.328e-05	0.06061	0.6889	0.1705	0.2305	0.03938	0.8752	28.47	25.678	31.738	33.302	18.976	15.808	15.593	15.469	11.461	13.503	21.974	17.352	14.498	23.828	18.344	20.493	24.598	12.869	14.518	21.732
FBgn0003371	sgg	GSK3B,GSK3A	protein_coding	0.4176	1.389e-05	0.1153	0.351	-0.005074	0.9848	0.08829	0.5674	43.526	37.166	33.495	34.299	27.582	30.773	24.597	24.947	29.655	31.149	28.466	37.154	33.294	33.125	27.698	26.948	33.894	33.966	33.102	29.575
FBgn0035087	CG2765		protein_coding	-1.001	1.417e-05	0.002889	0.9977	-0.3659	0.04531	-0.4441	0.02642	27.933	26.377	28.787	29.923	57.396	34.746	79.674	73.411	77.302	75.43	37.205	75.096	76.405	40.65	36.954	36.597	36.325	35.648	37.168	37.266
FBgn0022153	l(2)k05819	TMEM94	protein_coding	0.3706	1.428e-05	0.1676	0.1064	0.3159	0.001861	0.405	0.0001006	29.555	35.424	29.827	31.547	25.053	28.1	21.077	21.299	21.112	20.564	20.036	26.201	23.858	24.353	30.797	25.125	26.032	30.547	28.369	26.658
FBgn0034091	mrj		protein_coding	0.4588	1.445e-05	0.02172	0.9364	0.05766	0.7152	-0.1366	0.3705	20.703	14.39	21.939	22.239	13.787	12.835	14.393	14.627	16.272	17.325	17.814	17.577	16.721	18.99	18.596	19.625	17.555	17.903	14.845	13.269
FBgn0030343	ATP7	ATP7B	protein_coding	-0.4674	1.447e-05	-0.07842	0.5968	-0.108	0.447	-0.009517	0.972	3.533	4.142	4.814	4.991	5.981	7.597	5.758	5.809	5.334	6.224	6.044	4.941	5.316	5.274	5.239	4.94	5.185	5.11	5.325	6.702
FBgn0020626	Osbp		protein_coding	0.3014	1.47e-05	0.1714	0.06229	0.09994	0.3606	0.3067	0.0006823	34.314	35.617	36.459	35.006	24.915	27.244	31.726	29.449	25.335	26.475	26.591	28.624	34.26	29.859	28.639	27.964	29.858	30.487	35.795	32.903
FBgn0033739	Dyb	DTNA	protein_coding	-0.6702	1.482e-05	-0.1194	0.3323	-0.1007	0.5182	-0.1166	0.5413	13.358	13.322	12.517	12.966	19.552	13.877	26.932	27.597	17.699	17.241	20.552	12.386	15.858	14.88	14.679	14.096	17.882	14.41	14.422	19.361
FBgn0026761	Trap1	TRAP1	protein_coding	-0.2932	1.56e-05	-0.1838	0.03187	-0.2347	0.007211	-0.2659	0.002262	58.412	73.558	68.784	66.912	80.337	90.497	81.259	80.57	92.223	83.172	84.318	71.423	75.202	71.782	74.345	69.779	69.746	67.998	80.271	63.237
FBgn0035063	CG3594		protein_coding	-0.477	1.594e-05	-0.1038	0.4284	-0.1739	0.1904	-0.2507	0.07663	32.755	23.591	24.114	23.498	41.504	35.372	37.458	34.926	43.191	34.315	33.38	28.991	36.324	28.274	29.836	31.231	28.585	28.377	30.005	28.517
FBgn0051453	pch2	TRIP13	protein_coding	0.4636	1.6e-05	0.1357	0.2526	-0.00577	0.9828	0.06799	0.7109	75.935	57.899	70.679	66.863	43.774	42.901	51.34	51.712	46.155	47.249	40.558	58.976	54.489	48.845	43.697	45.772	43.201	43.692	48.142	50.291
FBgn0001986	Mtr4	MTREX	protein_coding	-0.3066	1.605e-05	-0.01284	0.9638	0.006519	0.9675	-0.1628	0.113	27.883	28.59	32.479	31.487	35.384	35.232	40.255	40.447	36.606	35.633	29.993	32.568	33.976	33.598	36.72	33.883	32.428	28.141	31.518	29.452
FBgn0266441	CG45071		protein_coding	1.152	1.61e-05	0.3316	0.07016	0.1734	0.232	0.3242	0.09762	39.174	32.633	36.438	33.493	13.403	9.317	17.813	17.918	14.16	10.098	6.408	20.018	24.845	12.403	19.521	17.468	10.84	16.396	21.364	12.986
FBgn0022349	CG1910		protein_coding	-0.3737	1.672e-05	0.007951	0.9821	0.05194	0.708	-0.05741	0.7173	99.756	117.344	113.826	117.322	143.101	158.165	148.477	145.093	128.207	132.045	146.599	135.658	132.379	143.418	149.754	139.459	144.325	143.539	141.692	103.619
FBgn0262570	CG43110		protein_coding	1.807	1.7e-05	1.742	0.002949	1.244	0.01184	2.267	5.599e-05	0.576	0.321	0.371	0.311	0.059	0.108	0.103	0.129	0.072	0.122	0.093	0.616	0.294	0.357	0.526	0.298	0.25	1.158	0.411	0.229
FBgn0000447	Dhod	DHODH	protein_coding	-0.4138	1.743e-05	-0.2109	0.0417	-0.2873	0.01166	-0.1965	0.1303	39.622	46.363	39.686	42.438	57.932	50.439	63.876	58.704	52.181	56.731	51.907	43.331	39.056	43.078	37.817	39.713	43.754	43.762	48.775	42.69
FBgn0001105	Gbeta13F		protein_coding	0.4934	1.748e-05	0.04297	0.8289	0.05078	0.7573	-0.06083	0.753	387.803	269.323	228.806	241.25	219.921	188.409	182.571	177.972	200.164	198.311	185.049	217.7	212.154	197.704	201.998	220.494	204.698	205.402	188.571	156.489
FBgn0036973	Rbbp5	RBBP5	protein_coding	-0.3901	1.751e-05	-0.05249	0.7553	-0.07502	0.5947	-0.1416	0.3087	13.141	13.855	11.391	11.35	16.752	15.64	18.013	16.485	16.581	17.173	18.123	14.085	16.48	17.32	16.244	15.077	16.183	13.36	14.539	16.907
FBgn0083120	Uhg8		ncRNA	-1.131	1.751e-05	-0.03889	0.798	-0.02767	0.8828	0.04269	0.8638	7.553	5.763	4.296	5.316	18.004	15.262	9.788	11.056	12.245	10.754	18.531	13.389	9.562	12.064	12.43	12.902	12.955	13.417	11.338	19.823
FBgn0015221	Fer2LCH		protein_coding	0.4809	1.76e-05	-0.06122	0.7096	0.002293	0.9981	0.1725	0.2367	452.068	470.623	436.764	515.935	364.28	344.499	274.738	308.958	329.151	297.502	304.947	295.193	268.688	279.903	302.687	317.084	314.754	354.06	325.515	414.396
FBgn0266409	CG45049		protein_coding	0.4948	1.772e-05	0.0863	0.5417	0.05292	0.7492	0.01185	0.9626	44.524	39.407	37.843	41.211	28.511	30.572	25.685	26.222	28.969	31.475	29.081	39.026	34.128	30.032	26.798	36.709	32.886	29.72	32.694	28.212
FBgn0032247	CG5188	METAP1D	protein_coding	-0.5549	1.824e-05	-0.1158	0.3592	-0.1865	0.1769	-0.177	0.2867	7.703	7.784	6.182	7.414	10.592	13.624	11.02	9.323	13.043	13.138	13.204	8.678	11.017	11.619	12.779	8.791	9.637	13.183	9.466	10.818
FBgn0003261	Rm62		protein_coding	-0.3014	1.828e-05	0.004084	0.9933	0.1068	0.3012	0.01721	0.9148	211.848	245.733	210.842	216.591	285.15	272.756	262.302	285.817	250.512	255.398	242.492	254.251	242.579	255.26	290.64	281.626	255.409	270.392	269.932	219.136
FBgn0038146	CG9799	WDR36	protein_coding	-0.5242	1.831e-05	-0.1136	0.3721	-0.1638	0.2261	-0.1732	0.2654	33.779	36.359	32.184	28.881	46.979	50.577	49.847	49.851	59.685	52.571	39.171	46.399	42.585	36.567	44.668	41.875	36.666	43.203	45.476	38.897
FBgn0036816	Indy	SLC13A5,SLC13A1,SLC13A4,SLC13A2,SLC13A3	protein_coding	0.6109	1.855e-05	0.08595	0.5365	-0.0139	0.9505	0.2031	0.2141	84.368	102.052	115.559	105.298	52.85	78.414	60.141	61.389	58.323	50.279	40.137	57.242	57.856	61.778	34.342	42.412	67.634	61.242	64.942	58.385
FBgn0037543	CG10903	BUD23	protein_coding	-0.4072	1.863e-05	-0.1604	0.1471	0.004792	0.9858	-0.1512	0.2732	19.146	19.097	19.38	16.603	24.889	27.472	24.602	24.331	37.244	32.04	27.402	26.045	27.659	24.857	33.595	36.346	27.31	27.188	28.268	27.996
FBgn0015801	Reg-5		protein_coding	-1.229	1.87e-05	-0.09438	0.4114	0.02752	0.8793	-0.3302	0.09781	10.422	16.781	10.933	13.113	37.853	37.004	27.828	29.095	21.865	24.167	41.633	17.516	18.38	22.383	34.616	37.453	25.131	27.65	16.154	8.366
FBgn0264785	Hph		protein_coding	-0.4159	1.932e-05	-0.07338	0.6267	-0.04595	0.7661	-0.007382	0.9764	24.576	24.874	21.199	21.585	33.449	23.935	33.574	35.852	26.03	26.91	27.886	24.589	22.51	25.776	24.185	22.775	28.952	25.281	25.815	28.942
FBgn0011259	Sema1a		protein_coding	1.148	1.96e-05	0.4452	0.0417	0.5244	0.02764	0.8889	0.002631	15.617	12.125	17.364	18.878	5.675	6.78	6.766	7.165	8.239	10.731	6.102	20.369	16.653	12.034	19.752	17.126	12.634	24.973	24.295	7.293
FBgn0262560	wcd		protein_coding	-0.4707	2.008e-05	-0.1106	0.3875	-0.2149	0.09492	-0.1789	0.2232	20.94	24.514	22.793	20.424	32.12	28.853	33.452	33.461	37.882	34.066	29.148	31.853	29.214	24.486	23.007	30.194	25.76	22.089	27.996	33.196
FBgn0264832	CG44040		protein_coding	3.81	2.01e-05	-0.03629	0.8034	0.01162	0.9473	-0.006911	0.9792	5.694	4.152	4.103	1.6	0.313	0	0.387	0.117	0.379	0.293	0.327	0	0.368	0	1.155	0.392	0	0	0	0.583
FBgn0034230	CG4853		protein_coding	0.2641	2.014e-05	0.1653	0.05404	0.1554	0.09977	0.2334	0.005995	33.551	35.48	34.876	35.42	29.277	29.844	27.504	28.303	26.986	27.142	28.781	30.093	34.254	32.284	30.181	30.521	33.647	31.761	34.749	32.738
FBgn0035148	CG3402	TAX1BP3	protein_coding	0.3238	2.026e-05	0.1108	0.3416	0.217	0.03534	0.1904	0.08018	65.976	54.505	58.596	60.356	49.619	49.047	45.032	43.736	46.829	55.537	53.135	60.73	63.145	53.533	64.121	65.043	60.658	65.069	58.123	60.36
FBgn0265711	CR44518		ncRNA	3.974	2.026e-05	0.8825	0.06741	1.059	0.04701	0.4695	0.1183	2.58	2.026	2.102	2.79	0.132	0.062	0.082	0.149	0.481	0	0	2.496	1.869	0.785	2.198	2.984	0.149	1.613	1.321	0.247
FBgn0036402	CG6650		protein_coding	0.3099	2.044e-05	0.1818	0.05018	0.1759	0.09218	0.2017	0.04823	30.148	31.605	31.339	32.714	25.494	22.985	24.905	26.65	21.141	25.752	24.035	29.882	25.484	29.898	27.789	26.013	29.266	28.302	28.561	27.024
FBgn0035498	Fit1	FERMT2,FERMT1,FERMT3	protein_coding	0.4207	2.078e-05	0.1937	0.06617	0.1356	0.2914	0.2101	0.1019	59.55	56.129	73.409	73.208	44.762	43.759	49.841	51.646	43.874	48.094	43.285	58.767	58.048	54	58.486	47.489	51.45	62.034	57.604	43.966
FBgn0040793	CG7630		protein_coding	0.441	2.083e-05	-0.1332	0.2612	-0.1739	0.1704	-0.2087	0.1172	379.37	300.748	319.746	300.361	201.831	181.456	284.663	257.529	353.834	354.641	378.16	312.948	297.09	297.791	261.336	318.447	317.224	295.555	283.821	320.278
FBgn0041629	Hexo2	HEXB,HEXA	protein_coding	-1.667	2.111e-05	-0.5403	0.05404	-1.646	0.001	-3.005	1.479e-10	15.437	23.291	30.285	34.266	67.958	178.308	69.838	50.99	203.004	222.83	168.3	96.704	103.62	35.405	69.056	62.283	30.269	31.968	29.822	4.794
FBgn0034013	unc-5	UNC5B,UNC5C	protein_coding	-1.073	2.144e-05	0.03806	0.8137	0.06838	0.6688	0.272	0.1468	14.589	24.273	9.559	10.626	33.354	49.27	26.284	26.771	33.463	34.082	27.965	38.381	38.315	36.398	43.47	37.944	35.738	60.713	55.858	29.56
FBgn0085383	CG34354		protein_coding	2.65	2.144e-05	1.174	0.02902	1.899	0.006763	1.772	0.005319	0.536	1.349	0.258	0.518	0.106	0.174	0.053	0.008	0.078	0.259	0.201	1.24	0.552	1.045	0.669	1.949	0.817	0.982	1.731	0.556
FBgn0025608	Faf2		protein_coding	0.2654	2.145e-05	0.02107	0.9158	0.04887	0.6464	0.2385	0.004083	67.633	69.944	65.681	65.301	58.293	58.036	52.555	52.251	48.781	53.169	55.252	53.675	47.139	60.251	53.448	52.284	59.917	62.951	62.959	63.363
FBgn0026598	Apc2		protein_coding	0.4042	2.153e-05	0.09535	0.4731	0.1662	0.1816	0.2479	0.04607	23.694	26.196	24.866	25.912	17.444	17.793	19.894	18.834	14.801	15.529	15.32	17.015	17.098	17.874	16.79	17.581	19.878	17.004	22.309	17.236
FBgn0032899	CG9338		protein_coding	-1.147	2.17e-05	-0.06341	0.6115	0.01284	0.9522	-0.1849	0.3298	99.791	104.349	85.194	93.278	299.027	217.473	192.651	219.088	125.77	136.218	258.682	95.049	105.777	189.09	168.315	168.811	207.106	132.239	130.657	111.013
FBgn0015376	cutlet	CHTF18	protein_coding	-0.6448	2.194e-05	-0.05952	0.7109	-0.03179	0.8701	-0.06263	0.778	7.367	10.072	10.841	9.487	15.112	18.322	14.303	14.989	15.824	13.187	15.662	9.974	13.476	15.297	10.366	15.327	16.16	14.724	12.407	14.437
FBgn0037541	CG2747		protein_coding	0.4979	2.219e-05	0.07226	0.6393	0.04823	0.775	0.2198	0.1273	24.296	21.258	27.408	25.523	14.042	18.117	17.509	17.204	18.418	18.805	14.432	21.735	19.083	17.523	18.575	17.847	18.92	20.353	23.15	20.051
FBgn0083121	Uhg7		ncRNA	-0.4354	2.282e-05	-0.1266	0.2983	-0.03613	0.8216	-0.07356	0.6695	512.683	468.93	418.865	424.712	749.152	651.114	551.423	599.417	431.655	473.168	521.418	398.382	358.286	444.289	405.723	495.203	456.49	433.746	431.472	467.512
FBgn0023091	dimm		protein_coding	-1.874	2.288e-05	-0.3976	0.097	-1.742	0.002303	-0.8287	0.02197	0.672	0.548	0.451	0.324	2.373	2.654	1.633	1.608	4.156	2.149	1.293	0.656	1.264	0.943	0.11	0.336	1.188	0.485	1.23	0.797
FBgn0038156	CG14372		protein_coding	-1.951	2.288e-05	-0.2782	0.1513	-0.6989	0.04342	-0.3268	0.1411	0.133	0.734	0.3	0.551	2.05	2.81	1.414	1.415	1.836	2.244	2.255	0.844	1.242	0.47	0.743	0.649	0.735	1.403	1.2	0.405
FBgn0262029	d		protein_coding	2.043	2.32e-05	0.04351	0.7117	0.01647	0.9225	0.3435	0.1332	0.766	1.009	0.462	0.359	0.123	0.142	0.099	0.181	0.623	0.391	0.227	0.783	0.946	0.153	0.148	0.805	0.399	1.219	0.941	0.659
FBgn0001987	Gli		protein_coding	0.6792	2.32e-05	0.2067	0.09075	0.1043	0.4993	0.875	1.314e-05	16.503	13.12	19.03	16.918	10.059	8.796	8.729	10.914	12.101	11.054	8.137	16.868	14.653	13.601	10.633	12.285	14.481	18.826	19.611	22.839
FBgn0040271	Sulf1		protein_coding	0.4525	2.364e-05	0.03952	0.8503	-0.003489	0.9927	0.05535	0.7756	16.573	14.57	13.65	14.125	9.19	10.643	10.635	11.019	11.781	11.784	11.591	11.087	12.162	14.101	10.045	9.856	14.738	13.242	11.114	12.784
FBgn0027602	CG8611	DDX31	protein_coding	-0.4007	2.375e-05	-0.09364	0.4829	-0.05968	0.6884	-0.08349	0.6021	15.381	18.58	17.623	16.893	21.687	27.255	22.145	22.04	23.282	19.366	17.039	17.858	16.967	17.57	19.01	17.138	18.959	17.127	17.741	19.935
FBgn0034885	Eglp4		protein_coding	5.136	2.379e-05	0.005625	0.9805	0.1575	0.3417	0.7119	0.05929	0.708	0.667	0.027	0.174	0	0.017	0	0	1.122	0.663	0.057	0.942	0.962	0.129	2.513	2.524	0.409	4.132	4.06	0.914
FBgn0013759	CASK		protein_coding	0.3888	2.389e-05	0.04385	0.8153	0.1385	0.265	0.2377	0.04622	22.397	22.366	18.854	18.863	16.278	17.817	13.117	14.069	13.289	13.28	13.218	14.982	12.977	14.392	16.717	15.934	13.575	17.686	16.685	14.606
FBgn0002183	dre4	SUPT16H	protein_coding	-0.2446	2.391e-05	-0.005797	0.9828	0.00364	0.9805	0.06376	0.5273	174.187	200.253	187.29	184.212	202.246	228.89	224.274	235.755	201.706	193.308	193.985	193.026	189.811	201.98	210.81	176.934	204.044	207.903	205.7	204.752
FBgn0030710	CG8924		protein_coding	-0.357	2.398e-05	-0.05989	0.698	-0.07026	0.596	-0.2534	0.02394	19.74	20.584	22.013	22.138	28.137	26.841	27.842	27.913	27.193	28.251	25.585	25.07	24.123	25.591	22.886	25.426	25.901	23.259	22.905	19.992
FBgn0011746	ana		protein_coding	-1.64	2.401e-05	-0.1681	0.2419	-0.5331	0.05953	-0.2869	0.1668	0.424	0.845	0.342	0.481	2.618	2.296	1.131	1.297	1.095	0.845	2.026	0.887	0.443	0.655	0.486	0.424	0.622	0.612	0.351	1.006
FBgn0035101	p130CAS	NEDD9	protein_coding	0.8082	2.422e-05	0.5694	0.008029	0.7442	0.001679	1.032	2.138e-05	62.565	71.308	83.08	83.337	42.326	38.978	37.004	41.094	27.92	26.543	26.821	52.371	53.166	39.186	60.073	50.951	42.939	70.006	68.404	39.749
FBgn0035644	DNApol-epsilon58	POLE2	protein_coding	-0.616	2.427e-05	-0.1633	0.1663	-0.07026	0.6791	-0.1806	0.2932	10.996	9.625	13.121	12.534	19.63	16.986	19.414	19.012	14.956	19.614	19.408	9.149	13.431	16.895	17.51	14.217	16.365	13.404	15.96	14.652
FBgn0003447	sn	FSCN2,FSCN1	protein_coding	1.319	2.432e-05	0.03738	0.7906	-0.0633	0.681	-0.2561	0.1852	22.385	6.434	15.329	15.038	4.748	3.498	6.553	6.685	13.243	12.011	8.126	17.791	16.492	7.357	8.376	9.545	8.129	6.604	6.638	7.122
FBgn0015271	Orc5	ORC5	protein_coding	-0.3888	2.439e-05	0.000681	1	0.05401	0.7135	-0.2555	0.03526	21.097	22.026	27.755	24.86	30.325	29.285	33.887	35.69	30.707	30.638	35.552	29.935	32.844	34.271	36.33	33.85	34.193	25.878	25.969	26.172
FBgn0050389	CG30389		protein_coding	0.3245	2.491e-05	0.1728	0.07752	0.009664	0.9539	0.1769	0.108	17.543	20.871	18.354	18.437	14.357	16.464	13.845	14.396	14.783	15.972	13.944	20.512	17.053	16.118	16.032	13.747	15.451	17.862	17.034	16.861
FBgn0030600	hiw		protein_coding	1.543	2.514e-05	0.03688	0.7737	0.04644	0.7581	0.1503	0.4299	0.692	1.289	0.486	0.503	0.194	0.231	0.249	0.242	0.278	0.429	0.169	0.563	0.346	0.251	0.379	0.522	0.207	0.302	0.453	0.511
FBgn0039056	CenB1A		protein_coding	-0.5539	2.538e-05	-0.1282	0.2983	-0.211	0.1203	-0.4397	0.002899	49.947	43.875	66.547	64.669	77.162	67.112	97.572	105.378	70.331	75.619	67.8	51.975	54.606	64.511	55.935	46.897	61.002	50.189	48.054	44.844
FBgn0031395	CG10874		protein_coding	0.4933	2.552e-05	0.1386	0.2462	0.06299	0.703	0.1574	0.3232	33.982	32.344	32.209	33.37	24.502	20.65	21.352	23.297	18.471	20.122	24.444	23.37	26.329	28.957	17.721	22.193	28.733	23.833	19.872	29.725
FBgn0029935	CG4615		protein_coding	-0.4267	2.576e-05	0.01645	0.9583	-0.07566	0.6103	-0.1456	0.3318	9.623	11.03	11.753	12.474	14.739	14.642	15.256	17.944	16.417	12.166	15.511	15.968	15.771	13.785	12.958	12.413	14.3	11.198	13.19	13.433
FBgn0030268	Klp10A	KIF2C	protein_coding	0.3538	2.576e-05	0.1288	0.2486	0.1274	0.2792	0.1529	0.1988	58.228	55.218	66.683	66.354	41.355	42.134	53.271	52.045	49.323	51.181	50.89	59.556	56.422	59.18	58.658	50.399	62.945	54.427	59.066	58.317
FBgn0038110	CG8031	MEMO1	protein_coding	0.6135	2.593e-05	0.1423	0.2329	-0.02789	0.8887	0.1017	0.6043	56.526	37.818	67.931	61.449	37.401	26.513	36.007	38.338	35.148	38.727	35.531	49.097	53.8	40.859	27.791	40.245	35.585	38.374	47.727	36.743
FBgn0015614	CanB2		protein_coding	0.4178	2.666e-05	0.007506	0.9834	0.01344	0.9462	0.07913	0.6394	51.475	41.021	34.787	39.052	33.98	35.829	25.696	24.749	36.055	35.966	33.361	34.394	35.134	36.837	36.336	35.41	35.55	36.939	38.707	37.423
FBgn0040285	Scamp		protein_coding	0.3127	2.683e-05	0.0491	0.7459	0.04787	0.7005	-0.05746	0.6808	79.635	67.115	75.229	74.232	58.362	56.654	59.63	59.946	61.216	63.917	62.867	68.132	61.476	69.725	64.976	68.819	64.932	61.414	66.574	52.276
FBgn0032195	CG4908	BCS1L	protein_coding	-0.4646	2.738e-05	-0.00376	0.9956	-0.08338	0.5828	-0.2006	0.1752	9.958	12.58	11.271	10.941	15.973	16.822	15.308	16.314	13.928	16.35	18.047	14.812	16.573	16.814	15.588	13.746	14.297	14.01	12.236	13.964
FBgn0010383	Cyp18a1		protein_coding	-1.021	2.747e-05	-0.03833	0.8137	-0.06408	0.6961	-0.1057	0.6152	12.455	10.526	13.781	17.049	45.273	21.645	24.893	27.52	17.342	16.771	10.677	12.866	12.52	12.488	12.548	12.472	12.015	10.127	12.01	14.841
FBgn0036108	Cpr67Fa1		protein_coding	5.737	2.748e-05	0.01341	0.9445	0.02841	0.8473	0.06326	0.7384	2.92	2.263	2.862	2.04	0	0	0.073	0	2.794	2.988	0	5.575	1.67	0.842	4.255	4.443	0.533	4.805	5.665	0.11
FBgn0264562	Hr4		protein_coding	1.64	2.783e-05	0.4744	0.06688	1.633	0.001066	2.354	6.937e-07	0.882	1.324	0.438	0.447	0.172	0.518	0.102	0.087	0.591	0.695	0.41	1.644	1.14	1.375	2.27	2.045	1.86	3.964	2.983	2.856
FBgn0039585	CG1894	KAT8	protein_coding	3.066	2.884e-05	0.2197	0.2511	-0.01886	0.906	-0.09117	0.6252	0.777	0.317	0.626	0.397	0.023	0.108	0.028	0.026	0.167	0.065	0.036	0.759	0	0.327	0.254	0	0	0	0	0.043
FBgn0026174	SkpD	SKP1	protein_coding	4.327	2.886e-05	3.385	0.00482	4.395	0.0008595	0.5764	0.08811	1.428	2.14	1.662	1.436	0.05	0.047	0.123	0	0	0	0	1.648	1.763	0.474	1.935	1.876	1.914	1.217	0.199	0
FBgn0003346	RanGAP		protein_coding	-0.3921	2.886e-05	-0.003119	0.9986	-0.1617	0.1819	-0.3591	0.001527	78.938	75.415	78.893	67.96	89.698	91.585	115.157	110.055	125.535	110.661	95.234	112.564	114.469	102.598	93.797	96.467	90.225	80.933	89.273	75.973
FBgn0004397	Vinc	VCL	protein_coding	0.449	2.925e-05	0.02578	0.9183	0.01873	0.9225	0.1363	0.3644	91.184	84.416	87.179	87.637	59.416	63.287	61.145	63.621	47.841	43.845	58.817	47.356	45.528	64.017	49.054	42.713	62.723	51.979	54.732	63.894
FBgn0035146	CG13893		protein_coding	-1.329	3.045e-05	-0.02596	0.8824	-0.1165	0.411	0.09272	0.6648	0.155	0.57	0.316	0.314	1.22	0.97	0.957	0.787	1.138	1.423	1.822	1.476	1.158	1.273	1.32	0.728	1.042	2.18	1.428	1.889
FBgn0266096	CR44833		ncRNA	1.888	3.101e-05	1.895	0.003466	0.3832	0.1192	2.133	0.00058	11.263	4.385	4.111	5.771	2.274	2.217	0.544	0.825	0.534	2.474	0.576	5.887	9.337	2.788	0.813	5.795	3.146	5.372	9.676	4.929
FBgn0029857	wuho		protein_coding	-0.4404	3.103e-05	-0.05092	0.7714	-0.03121	0.8555	-0.1731	0.2286	30.379	32.87	33.935	32.314	44.448	38.141	50.994	48.777	39.479	43.815	43.943	38.319	42.142	37.128	40.529	43.407	38.167	30.567	42.996	34.228
FBgn0031164	CG1724	TIMM17A,TIMM17B	protein_coding	1.983	3.114e-05	3.369	2.054e-05	2.904	0.0002316	2.917	9.325e-05	4.747	4.818	1.234	2.011	0.543	0.696	0.768	0.786	0.141	0	0.548	2.931	4.116	3.503	3.657	1.314	3.242	3.473	1.706	3.405
FBgn0260995	dpr21		protein_coding	1.301	3.168e-05	-0.04229	0.7385	-0.03813	0.8087	0.1229	0.5353	8.746	6.817	6.886	8.03	3.722	2.987	2.037	2.372	4.317	3.983	5.326	3.266	4.077	3.13	5.296	3.594	2.975	4.825	6.058	7.011
FBgn0002732	E(spl)malpha-BFM		protein_coding	2.285	3.211e-05	0.03173	0.8034	0.1019	0.4652	0.2758	0.1994	13.855	45.546	10.921	10.402	1.5	10.284	0.958	1.089	18.321	19.999	11.926	33.126	27.892	11.955	31.92	45.514	17.482	41.74	45.076	28.276
FBgn0005695	gcl		protein_coding	0.9345	3.316e-05	0.1363	0.2499	0.5044	0.02032	0.4759	0.02085	14.219	12.911	16.075	18.792	7.379	7.992	6.547	7.847	4.509	4.619	11.338	7.817	8.299	14.929	12.792	11.87	13.6	11.776	12.927	11.926
FBgn0025682	scf		protein_coding	-0.8244	3.316e-05	-0.09414	0.4407	-0.1867	0.1945	-0.5056	0.009436	121.011	101.073	204.448	171.592	250.602	215.372	354.338	324.506	318.037	331.374	313.871	209.166	255.928	265.813	186.199	228.756	262.94	210.957	220.523	130.686
FBgn0039277	CG13650		protein_coding	-1.2	3.327e-05	-0.07401	0.5282	-0.04078	0.8029	-0.211	0.2655	3.113	9.019	4.197	5.177	12.437	19.703	10.975	11.563	10.087	11.702	11.975	6.8	8.287	8.554	11.637	8.863	8.654	7.449	6.051	9.069
FBgn0037944	CG6923		protein_coding	0.3442	3.346e-05	0.2001	0.04328	0.1979	0.08338	0.3315	0.002356	11.618	12.517	12.73	12.929	9.298	9.556	9.686	9.923	8.343	8.23	7.945	9.125	10.864	10.364	11.83	8.835	9.254	10.451	10.999	10.613
FBgn0037667	CG16734		protein_coding	-0.3918	3.394e-05	-0.0453	0.8102	-0.01599	0.9332	-0.2523	0.04767	13.141	12.095	13.054	12.484	15.169	17.611	17.572	18.124	20.945	20.269	18.763	16.297	18.933	20.027	17.182	21.204	19.565	11.274	15.115	18.763
FBgn0261873	sdt		protein_coding	0.799	3.405e-05	0.2063	0.1068	0.5847	0.005793	0.5443	0.005453	31.453	42.202	30.482	31.505	17.86	20.603	16.785	17.028	14.43	14.784	21.201	22.98	20.302	33.696	29.115	24.309	36.903	30.11	25.973	31.745
FBgn0051133	Slimp		protein_coding	-0.4484	3.432e-05	0.04354	0.8263	-0.03759	0.8255	-0.08316	0.6518	11.616	11.685	10.317	10.86	15.693	17.405	15.211	14.534	11.038	14.528	16.457	14.415	16.083	15.369	12.664	13.496	13.981	11.294	11.353	15.426
FBgn0036931	CG14183	IQCA1	protein_coding	1.024	3.458e-05	0.0395	0.7903	0.007497	0.9755	0.1621	0.3998	6.122	4.678	5.17	6.297	2.497	2.336	2.432	2.714	2.415	2.34	1.685	2.506	2.73	2.493	2.006	1.452	2.969	1.963	3.472	2.972
FBgn0027054	CSN4	COPS4	protein_coding	0.3216	3.504e-05	0.06237	0.6695	0.2582	0.008434	0.2978	0.002907	64.545	67.87	61.623	65.289	48.441	51.489	53.952	50.028	51.397	45.903	50.324	52.507	50.127	56.354	60.797	67.497	57.119	60.491	56.826	68.885
FBgn0051646	DIP-theta		protein_coding	4.532	3.515e-05	0.03671	0.8009	0.114	0.4771	0.2208	0.2965	1.507	0.801	0.482	0.109	0	0.011	0.042	0.026	0.041	0.032	0	0.054	0.12	0	0.063	0.128	0.103	0	0.182	0.148
FBgn0262740	Evi5		protein_coding	0.8292	3.522e-05	0.05957	0.6804	0.03394	0.8572	0.052	0.8299	27.507	20.953	25.982	25.605	12.962	13.17	12.672	13.239	14.973	15.126	9.432	19.982	17.831	10.128	16.811	15.025	11.104	16.397	16.339	10.025
FBgn0029746	CG15465		protein_coding	1.628	3.531e-05	0.01313	0.9505	0.01603	0.9304	0.02565	0.9167	0.792	0.751	0.568	0.581	0.176	0.161	0.24	0.196	0.886	0.722	0.162	0.958	0.723	0.293	0.656	1.037	0.237	0.756	0.642	0.511
FBgn0263773	fok		protein_coding	-1.605	3.54e-05	-0.01636	0.9296	0.03496	0.8196	0.05162	0.8194	6.746	3.929	3.214	6.232	19.794	1.802	24.324	22.799	6.118	5.085	3.376	4.908	3.424	4.33	4.815	8.948	3.794	5.331	7.003	4.626
FBgn0052528	parvin	PARVA,PARVG,PARVB	protein_coding	0.344	3.558e-05	0.1453	0.1791	0.285	0.004921	0.2399	0.0283	74.038	72.192	75.049	77.181	57.599	51.047	59.082	62.584	49.447	48.433	55.898	58.837	58.088	64.237	69.377	67.622	62.259	70.599	64.82	54.397
FBgn0263240	Coop		protein_coding	0.7649	3.59e-05	0.03785	0.8409	0.1937	0.1769	0.1529	0.4194	41.161	50.441	40.313	41.347	23.691	20.915	24.059	26.132	17.616	19.7	38.071	25.13	22.656	37.107	32.295	32.916	41.388	35.597	29.096	28.8
FBgn0015903	apt		protein_coding	0.5905	3.616e-05	-0.0864	0.5346	-0.1293	0.3761	-0.4104	0.008137	118.939	144.451	151.473	166.893	93.786	90.643	89.86	91.11	100.464	104.485	83.039	85.826	87.35	68.395	89.584	80.748	66.645	80.592	74.341	39.506
FBgn0001942	eIF4A	EIF4A1	protein_coding	-0.3284	3.627e-05	-0.1111	0.3323	-0.02299	0.8701	-0.09317	0.4604	874.304	947.775	839.962	855.333	1076.61	1029.88	1204.28	1189.15	1155.24	1083.26	1160.78	918.777	952.721	1137.47	1121.22	1027.39	1154.38	1076.04	1099.64	973.889
FBgn0032397	Tom70	TOMM70	protein_coding	-0.3255	3.627e-05	-0.0785	0.5503	-0.09795	0.4041	-0.1777	0.1019	50.674	51.667	59.486	54.053	63.65	71.514	70.644	69.922	73.611	75.936	69.315	67.717	71.074	61.039	72.292	65.17	60.893	66.166	64.799	58.939
FBgn0052181	CG32181		protein_coding	4.28	3.628e-05	0.8712	0.06895	3.086	0.005173	0.1013	0.5841	0.823	0.837	0.196	0.497	0	0.014	0	0.065	0	0.04	0.023	0.068	0.356	0.751	0.956	1.136	0.617	0.234	0.057	0
FBgn0034511	GNBP-like3		protein_coding	-2.491	3.674e-05	-0.5383	0.09766	-0.0659	0.6303	-0.277	0.2128	1.323	1.655	0.577	1.585	17.53	5.22	5.813	6.717	2.775	1.25	4.686	0.3	0.674	0.754	0.704	1.673	2.438	0	0.254	2.253
FBgn0028963	Or49b		protein_coding	4.491	3.692e-05	2.208	0.01582	2.903	0.006402	0	1	0.294	0.548	0.627	0.686	0.038	0.018	0	0	0	0	0	0.178	0.2	0.536	0.209	0.212	0.68	0	0	0
FBgn0033631	Sod3		protein_coding	1.638	3.748e-05	0.08702	0.4436	0.3115	0.09736	0.08786	0.6776	0.464	0.696	0.319	0.404	0.178	0.077	0.221	0.073	0.236	0.684	1.578	0.765	1.376	1.925	0.719	1.769	2.452	1.187	0.907	1.271
FBgn0038261	CG14856		protein_coding	-1.301	3.759e-05	-1.892	8.444e-06	-2.392	2.381e-08	-3.214	1.88e-12	1.065	1.204	1.363	1.319	2.602	2.071	4.878	4.069	6.196	7.637	4.213	1.545	2.025	0.933	1.361	1.108	0.776	0.399	0.523	0.703
FBgn0037855	CG6621		protein_coding	-0.5273	3.863e-05	6.681e-05	1	-0.04502	0.7941	0.07317	0.7151	12.819	16.033	9.862	11.045	19.416	16.753	19.08	20.061	15.101	14.408	16.418	13.436	15.411	16.989	15.6	12.84	14.44	14.613	16.163	18.487
FBgn0264263	CR43763		ncRNA	5.213	3.937e-05	0.4019	0.1624	0.3059	0.2001	0.6558	0.07395	1.194	1.875	1.273	3.227	0.076	0	0	0	0.278	0	0	2.165	0	1.089	0.424	0.575	1.208	1.866	1.222	0.428
FBgn0085421	Epac		protein_coding	1.181	4.004e-05	0.1021	0.3766	0.1378	0.3313	0.07088	0.7545	26.039	58.582	48.446	56.197	26.101	16.552	15.762	17.068	11.336	10.766	11.186	18.213	17.523	15.548	19.311	14.392	16.613	16.011	17.974	4.705
FBgn0261514	NimA		protein_coding	2.649	4.014e-05	-0.008795	0.9653	-0.08135	0.5587	-0.1413	0.4501	1.894	1.272	4.977	4.888	0.284	0.204	0.563	0.614	1.283	1.151	0.161	0.698	1.327	0.216	0	0.642	0.59	0.463	0.727	0.127
FBgn0038984	AdipoR		protein_coding	0.2602	4.016e-05	0.03739	0.8102	0.05696	0.5842	0.05951	0.6163	59.063	59.762	66.298	66.789	48.484	56.54	52.725	50.576	54.963	52.186	54.148	55.776	58.974	53.611	56.543	58.627	56.153	52.338	55.261	60.204
FBgn0013720	pck		protein_coding	0.4293	4.039e-05	-0.000881	1	-0.01734	0.9312	-0.06433	0.7312	44.473	45.293	41.704	41.841	35.72	30.27	27.1	31.125	30.537	26.943	27.273	28.004	25.67	30.547	25.886	24.481	31.483	25.755	22.829	30.162
FBgn0265098	CR44203		ncRNA	1.879	4.109e-05	0.2365	0.1848	0.03654	0.7972	0.06968	0.7285	16.688	11.533	9.811	11.05	4.383	3.584	1.618	1.914	3.573	2.575	3.492	9.266	10.411	4.663	7.616	1.969	3.398	7.986	4.185	1.71
FBgn0285952	eEF5	EIF5A,EIF5AL1,EIF5A2	protein_coding	-0.2832	4.119e-05	-0.06927	0.5769	0.02684	0.8161	-0.02827	0.8464	1298.79	1222.98	1145.13	1145.8	1486.72	1352.77	1581.48	1510.32	1849.02	1788.54	1785.32	1590.68	1577	1864.82	1773.49	2005.41	1820.31	1757.79	1747.91	1796.33
FBgn0022359	Sodh-2	SORD	protein_coding	-1.323	4.119e-05	-0.208	0.1662	-0.2411	0.15	-0.5427	0.03171	7.148	4.21	12.737	7.23	20.098	8.172	31.982	27.096	24.596	27.399	27.353	10.097	16.5	15.357	14.953	11.704	16.681	15.821	13.7	8.62
FBgn0085753	28SrRNA-Psi:CR40596		pseudogene	3.189	4.119e-05	0.009185	0.9652	0.0182	0.9064	-0.009868	0.969	1.074	7.011	0.411	0.385	0.259	0.189	0.19	0.093	0.172	0.298	0.093	0.223	0.25	0.196	0.261	0.266	0.186	0	0.236	0.22
FBgn0263144	bin3		protein_coding	-0.3143	4.197e-05	-0.2207	0.01235	-0.2757	0.003423	-0.4087	1.232e-05	22.225	26.355	21.897	23.224	28.262	30.975	29.598	29.742	30.022	33.262	24.421	24.119	23.789	22.586	24.687	20.65	23.729	21.548	21.833	20.431
FBgn0028399	TMS1		protein_coding	0.4142	4.247e-05	0.006842	0.9851	0.1487	0.2446	0.3923	0.001119	118.633	127.164	127.698	132.315	95.021	110.789	76.955	84.581	95.566	88.585	94.154	95.267	86.542	99.39	103.849	116.802	107.299	140.854	134.7	112.598
FBgn0032819	CG10463	DUS3L	protein_coding	-0.4486	4.297e-05	-0.09555	0.4818	-0.09846	0.4988	0.1406	0.3609	18.128	16.054	15.011	12.648	23.958	25.123	19.313	18.986	22.627	22.358	20.796	19.053	21.015	16.666	19.917	20.693	17.379	21.201	27.095	25.94
FBgn0011206	bol	BOLL	protein_coding	1.309	4.38e-05	0.03758	0.7831	0.03552	0.8255	0.0852	0.688	4.972	3.425	2.293	2.459	1.129	1.536	1.075	1.018	1.735	1.644	0.962	2.023	1.798	1.655	1.976	1.808	1.275	1.564	1.905	1.802
FBgn0051125	CG31125		protein_coding	0.6947	4.392e-05	0.1521	0.2005	0.1171	0.4323	0.4283	0.01545	27.598	22.098	24.911	20.87	15.114	10.675	14.091	15.178	13.633	10.148	11.084	18	15.636	15.381	15.006	13.241	15.281	15.054	15.783	23.374
FBgn0037439	CG10286		protein_coding	-0.4143	4.403e-05	-0.06348	0.6907	-0.0757	0.6031	-0.1639	0.2413	37.367	37.416	38.952	37.389	48.054	51.725	56.013	52.372	53.647	48.571	38.721	40.35	49.206	38.295	40.885	44.113	42.475	37.868	45.599	37.504
FBgn0035833	CG7565		protein_coding	-0.4367	4.487e-05	0.05068	0.7757	0.1234	0.3761	0.286	0.03475	4.003	4.19	4.566	4.875	6.328	5.935	6.109	6.437	6.015	5.733	5.105	6.556	5.781	5.95	7.064	6.514	6.112	8.654	7.589	6.136
FBgn0037669	Ibf2		protein_coding	-0.5733	4.524e-05	0.009006	0.98	-0.02734	0.8911	-0.2689	0.09449	26.217	28.259	24.634	22.701	41.627	33.821	43.83	40.961	31.79	41.178	34.378	34.683	38.394	36.44	28.172	35.113	38.077	22.935	19.949	35.278
FBgn0036685	CG6664	CCDC6	protein_coding	0.2912	4.534e-05	0.05245	0.7153	0.02226	0.8641	0.1886	0.05402	63.834	56.803	68.824	63.461	49.755	45.648	53.119	55.362	52.77	58.145	50.602	58.065	58.117	55.419	54.986	54.03	56.696	63.842	60.925	62.799
FBgn0086909	CG31751	HYKK	protein_coding	0.5514	4.6e-05	0.144	0.2257	0.1406	0.3277	0.1201	0.5155	13.133	11.83	15.357	15.621	8.076	9.414	9.158	9.578	9.213	10.189	10.544	13.792	13.423	11.987	10.305	12.342	14.038	9.28	14.926	9.916
FBgn0052425	CG32425		protein_coding	-0.4935	4.612e-05	-0.0771	0.6045	0.04699	0.7826	0.09684	0.5876	41.055	39.042	40.458	37.859	61.78	54.982	57.348	59.184	42.062	42.291	57.446	36.892	33.531	53.627	52.857	48.11	51.384	54.23	52.768	49.537
FBgn0011710	Sep1		protein_coding	0.4704	4.625e-05	0.03469	0.8764	0.001523	1	0.03515	0.8713	175.877	135.386	170.631	175.363	104.508	90.815	130.521	129.154	146.831	145.987	120.211	157.334	151.415	129.796	132.817	142.387	138.423	135.198	153.821	138.021
FBgn0000473	Cyp6a2		protein_coding	1.478	4.713e-05	0.03586	0.783	-0.002285	0.9971	-0.09546	0.6356	4.578	9.106	10.626	11.176	3.244	2.123	3.142	2.858	3.201	2.527	2.147	3.875	4.561	1.95	3.141	2.5	2.162	2.862	2.734	0.693
FBgn0050493	CG30493	COQ9	protein_coding	-0.3956	4.733e-05	-0.1144	0.3613	-0.2883	0.01315	-0.3701	0.002663	21.92	20.732	21.334	19.826	28.002	29.232	28.734	27.561	33.227	26.36	27.221	27.91	24.352	22.224	20.007	22.398	22.341	22.112	20.566	20.679
FBgn0285925	Fas1		protein_coding	-0.6303	4.871e-05	-0.02172	0.9344	-0.03091	0.8743	-0.02158	0.9353	115.681	128.064	109.96	120.525	227.542	250.678	143.07	160.107	105.396	101.314	146.162	101.648	101.164	131.967	111.156	89.997	132.01	112.685	105.298	126.01
FBgn0025355	SuUR		protein_coding	-0.3918	4.894e-05	0.06656	0.6693	0.05075	0.7399	-0.05719	0.7512	8.185	9.734	10.366	10.275	12.188	14.27	13.115	12.69	14.255	11.667	12.484	14.969	13.142	14.077	12.293	13.167	15.159	11.984	12.26	12.081
FBgn0266540	CG45101		protein_coding	-0.3918	4.894e-05	0.06656	0.6693	0.05075	0.7399	-0.05719	0.7512	8.185	9.734	10.366	10.275	12.188	14.27	13.115	12.69	14.255	11.667	12.484	14.969	13.142	14.077	12.293	13.167	15.159	11.984	12.26	12.081
FBgn0043799	CG31381	TRIT1	protein_coding	-0.718	5.05e-05	-0.06309	0.66	-0.1203	0.4159	0.01089	0.9726	2.506	3.837	3.558	4.176	6.334	7.165	6.358	5.22	5.958	5.467	4.05	4.454	3.676	4.437	2.668	4.056	4.738	3.29	5.003	6.362
FBgn0028581	mei-217		protein_coding	0.4137	5.119e-05	0.1419	0.2247	0.01798	0.925	0.1971	0.1468	15.447	16.07	17.711	17.699	11.32	12.717	11.365	13.221	13.015	13.965	10.516	16.508	16.455	12.452	14.745	12.442	11.378	14.52	15.338	14.752
FBgn0085582	CR41257		ncRNA	3.365	5.14e-05	-0.01876	0.9065	-0.03733	0.7935	-0.1859	0.3534	6.464	2.937	3.224	4.358	0.142	0.402	0	0.639	0.517	0	1.225	0	1.255	0	0	0.267	0.641	0	0	0.265
FBgn0262527	nsl1		protein_coding	-0.3685	5.245e-05	-0.07032	0.6352	0.01389	0.938	0.02435	0.9001	30.355	40.888	33.126	35.939	45.801	51.166	43.828	45.188	33.193	34.263	37.539	32.379	30.085	33.25	40.455	31.05	35.677	33.843	36.192	37.122
FBgn0266098	rg		protein_coding	1.594	5.283e-05	0.01217	0.9562	0.01294	0.9459	0.0131	0.9612	0.772	0.719	0.553	0.566	0.174	0.161	0.231	0.197	0.854	0.731	0.155	0.949	0.694	0.284	0.619	1.008	0.238	0.714	0.606	0.488
FBgn0263076	Klp54D		protein_coding	1.251	5.284e-05	0.06576	0.5725	-0.004848	0.9866	-0.1108	0.5799	1.848	2.139	1.65	1.48	0.661	0.763	0.681	0.578	1.248	1.308	0.98	1.965	2.208	0.989	0.95	1.382	1.078	1.594	0.734	0.617
FBgn0039867	CstF50	CSTF1	protein_coding	-0.4323	5.303e-05	-0.07333	0.6317	-0.07871	0.6029	-0.46	0.0006123	19.123	20.243	19.685	17.759	24.364	23.014	32.206	28.145	25.138	23.139	26.897	19.977	25.815	21.153	24.099	21.43	22.468	13.243	16.916	19.011
FBgn0034501	CG13868		protein_coding	-1.412	5.422e-05	-0.05167	0.6687	-0.07431	0.6051	-0.005912	0.9881	15.352	15.797	9.974	9.238	51.201	48.291	23.615	27.278	11.323	10.912	25.196	7.642	7.162	19.045	7.657	8.449	18.159	12.758	11.79	22.102
FBgn0001624	dlg1		protein_coding	-0.4459	5.425e-05	-0.05945	0.7155	-0.05474	0.7327	-0.1717	0.2346	53.284	62.505	53.459	60.572	92.775	91.51	68.285	72.834	60.636	67.116	76.731	61.869	54.594	69.523	66.006	56.459	67.209	59.74	56.164	58.488
FBgn0034631	TAF1C-like		protein_coding	-0.35	5.447e-05	0.03371	0.8735	0.1085	0.3926	0.01567	0.9407	11.876	13.388	14.218	13.09	16.931	18.058	16.709	17.058	16.568	14.465	15.612	17.615	15.21	16.146	18.179	17.479	16.956	17.308	13.871	16.326
FBgn0032219	CG4995	SLC25A29	protein_coding	2.502	5.457e-05	0.004499	0.9843	0.0145	0.9302	-0.0245	0.909	2.429	1.497	1.381	1.416	0.347	0.164	0.268	0.171	0.632	0.427	0.102	0.307	0.384	0.464	0	0.653	0.539	0	0.174	0.567
FBgn0037135	CG7414	EIF2A	protein_coding	0.3597	5.457e-05	0.0917	0.4829	0.2775	0.008298	0.3217	0.003086	186.943	203.807	151.87	159.965	144.68	121.282	132.58	135.676	116.602	95.677	107.184	111.772	117.351	128.782	145.279	128.686	137.686	136.532	130.824	147.95
FBgn0266681	CR45171		ncRNA	1.228	5.46e-05	0.03314	0.8262	0.03212	0.8452	0.04879	0.8359	10.56	7.737	6.097	6.989	2.651	4.254	2.608	2.444	5.815	6.107	2.608	5.429	7.681	4.477	6.375	5.529	4.616	6.759	5.747	3.996
FBgn0033169	CG11123		protein_coding	-0.2993	5.572e-05	-0.08003	0.5395	-0.008886	0.9578	-0.07729	0.5691	22.871	24.033	24.19	24.231	28.795	27.665	31.44	31.426	28.06	24.747	26.255	21.907	22.949	26.477	28.455	22.909	26.871	22.58	25.021	25.584
FBgn0037569	tex	THOC3	protein_coding	-0.5071	5.657e-05	-0.03166	0.8882	-0.06321	0.7078	-0.08776	0.6499	19.784	24.011	20.276	19.786	30.433	27.874	35.891	31.159	30.472	28.291	30.336	28.33	29.381	26.171	27.634	28.944	24.527	22.788	19.93	36.25
FBgn0031361	CG17652	UTP23	protein_coding	-0.4875	5.694e-05	-0.0073	0.984	-0.2029	0.1413	0.02953	0.901	9.381	9.041	8.437	9.223	15.618	14.701	10.739	11.612	10.537	11.669	11.916	11.473	12.745	9.86	6.357	8.835	10.173	11.999	10.698	12.54
FBgn0265529	CR44379		ncRNA	2.687	5.699e-05	-0.000681	1	0.02999	0.8311	0.06616	0.7289	7.427	5.228	6.009	5.343	0.696	1.315	0.172	0.705	0.76	0.391	2.185	0.657	0.492	2.149	0.386	1.047	3.143	1.699	2.226	1.429
FBgn0264815	Pde1c		protein_coding	2.486	5.928e-05	0.05248	0.6528	0.2231	0.2282	0.5347	0.07975	0.321	0.302	0.162	0.252	0.037	0.062	0.01	0.037	0.105	0.196	0.026	0.213	0.276	0.107	0.341	0.463	0.093	0.434	0.591	0.069
FBgn0032050	CG13096		protein_coding	-0.5031	5.932e-05	-0.131	0.2834	-0.158	0.249	-0.3803	0.007357	82.711	74.869	82.614	75.236	103.498	107.181	132.736	125.549	146.744	144.972	97.27	111.762	113.218	88.905	110.276	119.152	87.817	92.569	103.501	78.092
FBgn0016672	Ipp	INPP1	protein_coding	0.395	5.932e-05	0.03473	0.8747	0.3317	0.004422	0.1728	0.2184	50.77	49.823	40.536	36.362	34.763	31.602	32.638	31.736	24.548	25.386	28.824	24.234	31.765	27.381	40.87	34.498	34.19	27.341	34.7	30.011
FBgn0031016	kek5		protein_coding	0.4675	5.936e-05	-0.05016	0.7795	-0.1066	0.4581	-0.07985	0.664	63.039	49.496	50.822	53.096	33.674	33.926	41.965	40.427	38.285	40.932	38.754	33.91	31.978	42.239	33.654	25.431	43.277	35.55	40.515	33.07
FBgn0025582	eIF3e	EIF3E	protein_coding	-0.2766	5.936e-05	-0.04994	0.7194	0.04553	0.6898	0.05661	0.6564	233.865	259.664	238.19	238.986	299.127	287.384	294.387	310.013	269.669	243.353	285.223	233.586	240.327	280.008	278.55	272.454	289.267	279.676	272.137	283.364
FBgn0025809	Paf-AHalpha	PAFAH1B3,PAFAH1B2	protein_coding	0.349	5.964e-05	-0.006673	0.9851	0.09278	0.4669	0.02493	0.8955	95.257	79.959	67.697	72.572	67.352	58.432	55.949	59.807	54.526	60.112	67.091	54.929	59.717	65.436	67.26	65.006	69.792	60.233	60.659	64.877
FBgn0002709	mei-218		protein_coding	0.4144	5.964e-05	0.1313	0.2737	0.02332	0.8972	0.1971	0.149	13.48	13.835	14.872	14.984	9.829	10.895	9.489	11.262	11.248	11.922	9.204	13.877	14.225	10.702	13.247	10.513	9.821	13.078	12.995	12.572
FBgn0261239	Hr39		protein_coding	-0.3434	5.964e-05	-0.1299	0.2467	-0.008316	0.9631	0.08579	0.5402	48.244	45.999	44.518	47.906	55.366	57.101	61.726	67.904	49.245	53.9	54.337	42.916	39.896	52.762	55.737	47.658	52.579	62.596	60.482	47.112
FBgn0032845	CG10747		protein_coding	0.6217	6.022e-05	0.04334	0.8151	0.1798	0.2052	0.3524	0.03466	15.424	12.582	15.101	15.792	9.929	9.965	7.849	8.108	6.924	7.43	12.476	8.412	9.698	12.175	11.319	12.202	12.837	11.078	17.528	11.324
FBgn0046776	CR14033		pseudogene	1.572	6.139e-05	0.02567	0.8656	0.07131	0.6101	0.00775	0.9808	10.001	12.528	11.414	9.208	1.719	4.852	3.203	3.009	13.524	9.907	2.432	12.728	13.436	5.648	15.885	15.414	5.512	8.464	14.003	3.963
FBgn0260768	CG42566		protein_coding	0.7724	6.159e-05	0.08156	0.5282	0.3315	0.04336	0.05809	0.8071	76.074	79.152	111.867	102.911	46.049	58.927	49.403	45.697	56.474	58.047	84.582	75.361	67.708	110.733	95.544	106.999	117.008	81.412	68.16	67.854
FBgn0051612	CG31612		protein_coding	-1.595	6.205e-05	-0.02125	0.8995	-0.2993	0.1279	-0.1724	0.3609	0.124	0.073	0.245	0.165	0.41	0.612	0.554	0.536	1.006	0.804	0.628	0.99	0.775	0.362	0.528	0.072	0.516	0.775	0.648	0.285
FBgn0040104	lectin-24A		protein_coding	2.187	6.233e-05	0.07641	0.5281	0.4441	0.1096	2.372	0.0006765	1.224	1.339	0.814	1.096	0.134	0.317	0.125	0.227	0.367	0.378	0.211	1.11	0.594	0.399	1.117	1.264	0.834	1.64	3.222	1.693
FBgn0029896	CG3168		protein_coding	-1.334	6.304e-05	-0.6077	0.03603	-0.5619	0.03814	-1.189	0.002099	14.358	15.399	17.018	14.545	39.352	57.922	37.837	38.29	43.941	42.507	69.65	19.443	14.675	32.701	18.795	15.47	35.323	14.208	12.316	29.253
FBgn0033195	CG1360		protein_coding	-0.5797	6.304e-05	-0.03712	0.8549	-0.05566	0.7526	-0.007395	0.9833	4.458	4.795	4.315	5.038	7.633	8.652	6.54	6.619	6.642	6.124	7.277	4.834	6.913	6.457	4.541	5.814	7.314	4.697	6.401	7.925
FBgn0037061	CG12975		protein_coding	-0.4404	6.36e-05	-0.1428	0.227	-0.09754	0.5064	-0.3254	0.01743	42.232	34.15	33.585	36.448	52.535	54.649	51.234	47.074	50.332	52.071	54.625	39.41	39.48	47.592	38.174	46.912	51.478	26.746	40.672	44.803
FBgn0029766	CG15784		protein_coding	-1.069	6.452e-05	-0.07106	0.5543	-0.01685	0.9356	0.08171	0.7119	259.493	484.076	196.584	225.515	861.922	863.77	451.843	532.005	304.284	260.349	383.728	170.79	189.124	330.868	275.056	289.273	330.893	345.706	324.687	439.046
FBgn0283535	Vha26	ATP6V1E2,ATP6V1E1	protein_coding	0.4378	6.455e-05	0.03756	0.8583	-0.003901	0.9905	0.02914	0.8916	286.393	198.916	232.399	234.908	166.246	162.849	174.333	173.347	218.964	228.538	182.863	250.288	232.81	187.182	217.083	217.034	192.676	225.344	229.508	193.369
FBgn0034786	CG13531		protein_coding	0.5063	6.474e-05	0.1269	0.3032	-0.01481	0.9468	0.0771	0.6998	10.521	8.533	13.058	13.676	6.837	6.85	8.306	8.725	6.306	7.939	6.608	9.242	9.005	7.805	6.626	6.626	7.067	7.236	8.241	7.147
FBgn0029813	CG15766		protein_coding	-1.169	6.538e-05	-0.1145	0.3323	-0.05627	0.7213	-0.09732	0.6452	5.961	7.074	6.42	7.02	17.5	16.143	17.545	15.229	15.43	14.223	20.497	5.81	8.461	16.565	14.021	12.989	13.815	10.292	13.665	16.4
FBgn0039792	CG2267		protein_coding	1.866	6.538e-05	0.2875	0.156	0.05442	0.6987	1.877	0.001262	2.357	2.024	1.743	2.752	0.34	0.588	0.373	0.785	0.206	0.955	0.592	0.802	1.868	2.106	0.627	1.136	0.852	3.838	4.073	1.021
FBgn0029942	CG2059	ABHD11	protein_coding	-0.6563	6.553e-05	-0.04682	0.7865	-0.02695	0.8943	0.1834	0.3026	17.422	26.669	18.383	16.395	38.414	37.908	27.509	29.448	26.169	22.406	26.002	18.321	21.274	25.924	20.933	25.868	23.64	26.916	22.386	42.641
FBgn0001255	ImpE3		protein_coding	1.296	6.585e-05	1.088	0.01167	0.1249	0.3764	0.3456	0.1145	3.035	2.567	2.763	3.73	1.017	0.847	1.294	1.245	0.218	1.261	1.173	2.965	4.018	1.492	1.326	2.137	1.35	0.73	1.913	2.512
FBgn0051680	CG31680		protein_coding	5.692	6.657e-05	0.02658	1	0.03917	0.7956	0	1	2.262	1.618	1.974	1.549	0	0	0	0	0	0	0	0	0	0.147	0	0	0.14	0	0	0
FBgn0260429	CG42524		protein_coding	1.562	6.667e-05	2.345	8.065e-05	2.067	0.0004599	1.883	0.0006823	4.422	3.854	3.15	3.652	1.658	1.836	0.42	0.55	0.544	0.267	0.277	2.951	1.634	1.647	1.13	2.096	1.995	2.212	0.924	1.801
FBgn0028427	Ilk	ILK	protein_coding	0.2873	6.727e-05	0.1823	0.04361	0.2061	0.03398	0.1567	0.1319	83.341	68.215	77.536	76.781	58.893	55.977	65.407	66.709	52.731	51.825	59.144	60.036	64.089	71.338	63.873	64.251	67.538	64.749	64.387	57.822
FBgn0265598	Bx		protein_coding	-0.7255	6.769e-05	-0.1855	0.1304	-0.1777	0.2134	-0.325	0.06209	8.033	10.841	8.197	9.39	16.666	21.026	14.635	12.745	19.089	18.135	28.229	14.087	12.465	17.859	15.769	12.794	19.154	16.842	17.104	10.908
FBgn0036814	CG14073		protein_coding	-0.6091	6.777e-05	-0.9646	5.608e-06	-0.9037	1.398e-05	-0.5033	0.002774	10.332	8.707	8.844	9.421	15.11	19.325	13.07	13.035	13.093	14.99	13.574	6.59	6.048	8.195	5.507	5.977	9.796	7.436	6.368	11.793
FBgn0266448	CG45078		protein_coding	1.66	6.792e-05	0.00333	0.9937	0.1202	0.3917	0.3308	0.1135	1.371	1.068	0.309	0.196	0.187	0.225	0.168	0.21	2.165	1.72	2.614	2.567	2.764	1.453	3.579	4.859	1.995	5.116	4.688	2.665
FBgn0038966	pinta		protein_coding	-0.4893	6.792e-05	-0.06142	0.708	-0.07574	0.6328	-0.05241	0.8059	20.254	18.697	18.253	17.229	32.222	30.598	23.653	22.751	25.753	27.364	29.408	23.839	27.085	23.006	19.066	26.89	27.208	20.644	29.842	26.777
FBgn0031191	Cp110		protein_coding	-0.526	6.797e-05	-0.1398	0.2435	-0.2109	0.1245	-0.1228	0.4929	7.502	9.875	9.142	8.521	13.047	12.799	13.578	13.864	11.972	14.222	12.283	10.868	8.003	11.19	10.187	8.151	10.854	10.862	8.584	13.958
FBgn0263219	Dscam4		protein_coding	-0.8746	6.797e-05	-0.5658	0.01958	-0.3147	0.06952	-0.9331	0.001381	0.194	0.437	0.382	0.444	0.984	0.816	0.557	0.614	0.783	0.976	0.798	0.683	0.292	0.383	0.481	0.498	0.513	0.404	0.496	0.286
FBgn0011674	insc		protein_coding	0.8309	6.871e-05	0.06429	0.6393	0.03878	0.8284	0.3257	0.07514	17.743	16.087	19.388	17.606	6.715	11.939	9.253	8.597	16.789	16.42	5.086	16.171	16.04	15.254	14.321	13.14	14.612	19.86	17.731	20.707
FBgn0037841	CG4565		protein_coding	-1.561	6.882e-05	-0.5898	0.04892	-1.325	0.005868	-1.682	0.0007903	1.573	1.505	1.831	1.45	4.721	2.426	7.662	6.63	8.388	7.222	7.945	1.783	2.805	4.217	2.513	1.847	2.729	1.23	0.453	3.667
FBgn0028398	Taf10		protein_coding	0.4767	7e-05	-0.02249	0.9333	0.02736	0.887	-0.002836	0.9968	49.24	39.572	41.937	41.886	30.395	28.384	29.43	30.096	31.027	33.796	37.042	38.144	25.26	34.875	30.585	34.66	40.489	36.08	39.982	27.867
FBgn0033459	CG12744		protein_coding	-0.5814	7.34e-05	0.08115	0.5668	0.04748	0.7893	-0.04616	0.8411	49.328	46.706	62.107	67.909	90.243	93.81	89.27	85.91	88.719	110.107	83.076	129.57	113.267	92.437	104.214	117.666	84.671	93.105	100.148	74.665
FBgn0033737	Nup54	NUP54	protein_coding	-0.3229	7.357e-05	-0.004742	0.9925	-0.04941	0.7165	-0.04961	0.7596	28.561	28.059	29.371	28.295	35.905	32.496	39.056	38.402	35.005	32.647	33.773	30.39	32.533	37.223	31.874	30.046	33.395	27.555	29.949	37.691
FBgn0262473	Tl		protein_coding	-0.8964	7.376e-05	-0.1024	0.3817	-0.047	0.7866	-0.3215	0.08693	1.622	3.598	3.66	3.889	5.884	5.469	7.13	7.724	7.033	5.609	6.391	4.189	5.163	4.096	5.512	6.606	4.604	4.25	5.912	2.091
FBgn0032506	CG9395		protein_coding	3.02	7.457e-05	0.02906	0.8306	0.03538	0.7996	0.005101	0.988	0.264	0.598	0.26	0.24	0.047	0.022	0.048	0.009	0.199	0.022	0.049	0.221	0.138	0.074	0.303	0.088	0.035	0.191	0.094	0.029
FBgn0050035	Tret1-1		protein_coding	-1.01	7.584e-05	0.01093	0.9664	-0.2248	0.1487	-0.01388	0.9622	6.862	4.487	5.153	2.865	11.679	5.264	12.923	13.238	12.914	7.167	5.416	7.916	10.522	8.289	4.029	4.813	6.478	7.256	8.215	9.138
FBgn0027341	Gfat1	GFPT2	protein_coding	0.7199	7.584e-05	0.138	0.2445	0.02105	0.9219	0.01963	0.9427	5.943	6.288	6.905	6.497	3.039	3.978	3.554	3.853	6.363	5.29	5.191	9.552	7.405	6.639	6.284	6.605	4.817	5.253	5.414	6.467
FBgn0028708	Mst85C		protein_coding	0.4122	7.584e-05	0.001626	1	0.04281	0.793	0.1015	0.5416	38.294	37.429	33.8	35.103	27.367	24.202	25.884	27.47	22.222	21.939	27.798	21.218	20.715	29.958	25.532	24.564	26.757	25.291	26.638	27.466
FBgn0259237	CG42335		protein_coding	4.881	7.591e-05	0.2905	0.2198	2.493	0.009565	1.978	0.01097	0.397	0.342	0.036	0.135	0.012	0	0	0	0	0	0	0.166	0.042	0.028	0.195	0.309	0.212	0.287	0.235	0.088
FBgn0038608	WRNexo		protein_coding	-0.6774	7.594e-05	-0.01829	0.9484	-0.01855	0.9337	-0.2486	0.1481	23.02	22.896	29.339	29.715	46.161	48.862	42.376	43.067	38.477	41.625	61.153	40.001	37.065	57.218	42.003	40.832	53.151	28.609	44.174	32.002
FBgn0031209	Ir21a		protein_coding	3.437	7.603e-05	0.05002	0.6902	0.2038	0.2806	0.04306	0.8287	0.777	0.877	0.565	0.454	0.062	0.024	0.046	0.042	0.272	0.14	0	0.235	0.396	0.236	0.759	0.14	0.59	0.101	0.398	0.046
FBgn0036336	ste14	ICMT	protein_coding	-0.5281	7.628e-05	0.1198	0.3357	-0.1368	0.342	-0.1078	0.569	12.837	11.239	9.651	8.545	17.062	19.314	14.277	13.227	13.491	13.192	17.619	20.516	18.666	17.036	14.187	11.836	10.895	10.847	15.028	13.189
FBgn0025878	wrapper		protein_coding	-2.974	7.644e-05	-0.08903	0.4889	-0.0976	0.5017	-2.068	0.005119	7.623	10.323	13.91	12.321	98.66	71.202	141.675	153.148	27.528	28.237	140.853	7.109	7.372	59.274	10.731	8.84	64.669	2.289	3.704	16.279
FBgn0267454	CR45804		ncRNA	2.693	7.661e-05	0.04154	0.7294	0.2711	0.2025	0.2083	0.3061	1.347	1.983	2.519	1.703	0.444	0.07	0.229	0.166	0.807	0	0.29	0.873	0	1.054	0.615	0.695	2.253	2.105	0.296	0.69
FBgn0034258	eIF3c	EIF3C,EIF3CL	protein_coding	-0.3843	7.673e-05	-0.04113	0.8336	-0.06921	0.6223	-0.1038	0.4844	173.031	209.593	214.261	215.475	254.749	232.84	297.351	307.707	237.529	212.821	232.501	199.638	201.392	241.995	215.833	184.698	226.405	209.442	205.676	207.698
FBgn0034914	CG5554		protein_coding	0.2735	7.673e-05	-0.02795	0.8816	0.01799	0.8882	-0.07671	0.5125	284.206	246.202	263.674	254.731	203.398	182.227	239.229	231.976	248.911	215.656	227.93	211.986	214.353	242.485	228.887	233.336	244.863	223.393	215.708	212.891
FBgn0023541	Cyp4d14		protein_coding	0.7746	7.704e-05	-0.009544	0.974	0.04382	0.7987	0.278	0.1314	6.936	6.601	5.44	6.226	3.302	4.195	2.794	3.215	2.109	2.117	3.637	3.009	2.595	2.294	2.676	3.705	2.79	5.028	3.86	3.605
FBgn0037442	godzilla		protein_coding	0.5036	7.704e-05	0.06027	0.7131	0.2053	0.1285	0.2211	0.1466	36.603	45.591	44.022	48.545	30.044	34.573	25.235	27.47	25.74	28.987	35.178	30.141	33.633	37.018	39.433	34.705	42.107	40.784	40.525	31.361
FBgn0034996	CG13575		protein_coding	5.588	7.776e-05	0.1498	0.3804	0.1391	0.4124	0.6904	0.06439	0.498	0.453	0.5	0.434	0	0	0	0	0	0.049	0	0.246	0	0.289	0	0	0.353	1.132	0.208	0
FBgn0030869	Socs16D		protein_coding	0.3923	7.827e-05	-0.01336	0.9653	0.09768	0.4788	0.2134	0.1035	23.429	24.163	17.401	18.594	17.855	16.626	13.871	13.293	14.637	14.022	13.041	14.103	13.84	12.878	15.228	16.607	15.025	20.347	15.887	14.763
FBgn0260450	CalpC		protein_coding	0.4012	7.921e-05	0.1715	0.1202	0.3856	0.0008678	0.3684	0.002726	51.112	59.028	54.048	57.432	40.83	37.658	40.805	43.171	35.367	30.154	37.418	41.325	42.576	44.335	51.827	43.649	51.43	50.623	49.352	41.727
FBgn0031315	CG14341		protein_coding	0.5989	7.974e-05	0.09574	0.4567	0.09403	0.5501	0.1934	0.2705	47.053	31.981	33.058	30.419	25.014	18.414	23.799	20.794	22.859	19.789	19.951	22.95	34.738	20.69	23.859	23.814	26.182	34.201	22.673	23.822
FBgn0030752	CG9947	TMEM30A,TMEM30B	protein_coding	0.3239	8.093e-05	-0.01431	0.9629	0.03061	0.8292	-0.02473	0.8935	45.239	48.133	48.296	53.779	36.305	38.333	39.324	39.229	35.203	38.505	43.252	38.1	33.685	43.082	38.457	42.534	40.947	39.636	42.61	33.822
FBgn0011659	Mlh1	MLH1	protein_coding	-0.6602	8.179e-05	-0.02089	0.9364	-0.003152	0.9954	-0.1001	0.6274	16.413	18.584	17.646	16.036	30.298	29.483	27.122	29.637	21.809	27.169	29.424	20.765	23.135	30.072	24.555	22.064	31.217	22.963	19.349	26.723
FBgn0037766	Teh1		protein_coding	2.415	8.319e-05	1.343	0.02346	1.831	0.008602	0.03953	0.847	0.844	0.53	0.535	0.609	0.065	0.191	0.036	0.081	0.052	0.263	0.034	0.442	0.484	1.027	0.399	1.112	0.7	0.176	0.288	0.013
FBgn0036565	CG5235	MOXD1	protein_coding	-0.4163	8.583e-05	-0.03147	0.8882	-0.1116	0.4172	-0.2971	0.02083	28.643	34.478	38.802	39.184	45.548	51.081	47.726	51.07	48.54	55.262	50.762	51.042	47.575	48.443	43.676	46.35	44.899	43.007	40.521	35.884
FBgn0264379	CR43831		ncRNA	5.47	8.64e-05	1.317	0.03582	1.402	0.02782	0.5153	0.0976	1.946	2.722	1.557	2.691	0	0	0	0	0	0	0	3.089	2.313	1.776	3.108	2.461	1.477	3.042	0	0.174
FBgn0004244	Rdl		protein_coding	3.335	8.649e-05	0.04005	0.7445	0.05643	0.6925	0.2103	0.306	0.237	0.273	0.132	0.209	0.033	0.017	0.004	0.004	0.079	0.184	0	0.223	0.232	0.052	0.202	0.219	0.074	0.385	0.291	0.088
FBgn0037035	CG10589		protein_coding	3.91	8.66e-05	2.813	0.008803	3.47	0.003502	2.074	0.009972	0.811	0.771	1.053	0.782	0.048	0.091	0	0	0	0	0	0.339	0.508	0.797	1.461	0.361	0.325	0.975	0.383	0.045
FBgn0037759	CG8526	ASPG	protein_coding	-1.694	8.711e-05	-0.006857	0.9778	-0.03842	0.7906	0.0864	0.6642	0.37	0.557	0.551	0.425	2.324	1.21	1.545	2.117	1.036	0.667	1.092	1.12	0.615	0.901	0.438	0.654	1	0.129	0.379	2.774
FBgn0039735	Nph		protein_coding	-0.3693	8.711e-05	-0.2007	0.04892	-0.05668	0.6984	-0.2433	0.0413	233.365	201.621	172.026	165.168	272.439	237.847	259.368	254.738	268.892	232.17	241.867	184.267	200.378	204.912	225.438	245.99	220.405	198.179	192.968	211.275
FBgn0284442	Mcm3	MCM3	protein_coding	-0.6782	8.769e-05	-0.0313	0.8831	-0.06745	0.695	-0.3	0.07852	48.384	51.623	57.665	52.155	80.793	72.817	105.542	102.315	78.293	73.956	95.221	66.509	73.186	87.073	71.157	62.946	82.006	53.103	51.654	69.605
FBgn0026149	BCL7-like	BCL7A	protein_coding	-0.3687	9.056e-05	-0.09637	0.4595	-0.03889	0.7935	-0.3135	0.006299	93.228	81.666	108.029	114.887	137.879	125.427	133.848	130.932	134.188	133.586	149.511	119.355	118.107	130.667	129.238	136.827	130.941	116.139	102.798	103.126
FBgn0036749	CG7460		protein_coding	1.02	9.08e-05	0.08026	0.4868	0.2736	0.1158	1.955	3.763e-08	6.893	7.217	4.358	4.581	2.877	2.918	2.345	2.06	2.44	2.114	0.949	2.547	2.659	2.602	2.356	4.059	3.101	7.716	10.065	4.639
FBgn0051807	CG31807		protein_coding	2.106	9.191e-05	0.1121	0.3837	-0.0275	0.8484	0.04809	0.8175	2.079	1.428	2.117	1.916	0.333	0.44	0.37	0.3	1.09	1.684	0.261	2.514	3.413	0.711	0.738	0.876	0.676	0.542	1.463	1.429
FBgn0039407	CG14544	TRMT61A	protein_coding	-0.6239	9.283e-05	-0.143	0.227	-0.02824	0.8884	-0.4396	0.01189	9.637	9.804	8.899	9.044	15.208	15.925	15.479	14.976	18.938	12.475	17.389	10.257	11.145	13.957	16.623	15.887	13.888	4.731	10.154	13.596
FBgn0086676	spin	SPNS1,SPNS3,SPNS2	protein_coding	-0.625	9.349e-05	-0.01625	0.9578	-0.1946	0.1678	-0.2575	0.1208	60.388	64.971	74.092	68.312	85.954	73.541	143.939	138.533	125.732	114.08	74.285	104.042	118.679	78.58	82.132	76.481	74.344	87.371	82.094	65.595
FBgn0034913	Snap29	SNAP29	protein_coding	0.3579	9.371e-05	0.07158	0.6333	-0.009385	0.9626	0.1775	0.1695	62.734	49.938	69.498	73.35	48.85	44.765	50.873	49.768	41.956	40.824	51.646	46.127	50.583	52.062	41.292	42.242	49.118	45.463	55.03	55.626
FBgn0260962	pic	DDB1	protein_coding	-0.3071	9.446e-05	-0.03881	0.8284	-0.2219	0.02637	-0.1384	0.2192	86.723	91.801	92.113	84.734	99.968	116.678	116.225	114.684	125.868	115.192	101.11	112.296	112.246	101.376	99.657	87.649	94.299	88.41	101.63	114.159
FBgn0000274	Pka-C2		protein_coding	0.8546	9.581e-05	-0.001496	1	0.2156	0.1515	0.4329	0.03154	31.621	20.221	22.809	25.364	13.749	7.558	14.276	14.759	6.974	8.931	7.613	7.785	7.889	7.719	11.963	13.32	11.443	16.773	15.414	9.19
FBgn0003520	stau		protein_coding	0.4226	9.588e-05	0.05699	0.7302	-0.02652	0.8833	0.09428	0.5727	60.421	49.519	44.168	47.066	35.391	39.322	35.492	34.28	39.881	40.289	36.181	45.621	41.409	40.324	39.278	33.421	39.275	36.887	39.167	50.536
FBgn0036500	CG7275	DCAF13	protein_coding	-0.3512	9.588e-05	-0.1698	0.1093	-0.0988	0.4447	-0.1337	0.3187	39.981	38.506	39.241	35.864	52.096	53.052	47.792	47.782	45.643	45.092	58.905	39.875	38.145	45.066	45.119	43.383	46.045	46.294	47.762	40.767
FBgn0037632	CCT7	CCT7	protein_coding	-0.4457	9.706e-05	-0.2182	0.04599	-0.3266	0.008302	-0.4931	0.0001874	184.984	176.298	205.03	193.302	229.422	205.409	333.533	310.31	320.031	302.503	247.568	204.763	226.046	223.789	203.946	202.84	217.442	172.536	164.737	235.131
FBgn0010397	LamC		protein_coding	0.7876	9.809e-05	0.1689	0.1694	0.2212	0.1365	0.2272	0.2112	127.472	111.423	109.936	105.705	53.418	50.923	67.805	69.204	62.266	56.007	103.075	87.052	94.191	151.739	96.362	90.268	143.92	106.259	111.561	85.097
FBgn0036577	CG13073		protein_coding	3.642	0.0001002	0.03163	0.8409	0.09392	0.546	0.1739	0.3733	1.078	0.401	0.727	0.419	0.044	0.041	0.054	0	0	0	0	0.103	0	0	0	0.082	0.049	0	0.174	0
FBgn0030570	CG12540		protein_coding	0.7154	0.0001006	0.06437	0.6468	0.3908	0.02756	0.9216	0.0001292	53.38	39.687	48.971	46.843	27.244	20.131	27.618	31.225	15.889	16.797	16.096	17.204	18.13	24.058	33.118	29.492	19.517	44.825	32.356	26.658
FBgn0026175	SkpC	SKP1	protein_coding	2.506	0.0001028	1.115	0.03209	0.06843	0.6173	0.525	0.08425	3.113	1.993	2.284	2.495	0.26	0.246	0.515	0.351	0.757	2.339	0.082	5.402	5.701	4.695	0.865	1.761	2.701	5.502	4.574	1.068
FBgn0285991	hpRNA:CR18854		ncRNA	0.7659	0.0001036	0.1188	0.3167	0.3677	0.03392	1.466	9.44e-09	123.498	116.307	125.127	120.986	51.005	73.832	70.613	66.902	77.193	81.423	82.311	106.673	106.876	121.019	125.457	147.646	124.443	148.046	150.057	390.084
FBgn0000032	Acph-1		protein_coding	0.3533	0.0001037	0.01317	0.9653	0.1543	0.2105	0.07527	0.6449	25.535	23.635	31.898	33.531	22.561	20.486	21.848	22.656	22.711	22.947	23.011	25.027	21.775	23.382	26.966	28.883	25.106	27.882	24.295	22.418
FBgn0010894	sinu		protein_coding	0.5698	0.0001053	0.1392	0.2436	0.07737	0.6362	0.3394	0.03518	28.739	22.316	25.002	26.511	17.646	14.962	14.302	18	13.379	14.831	11.041	18.398	16.805	16.558	11.064	16.866	16.524	17.016	19.949	18.69
FBgn0031049	Sec61gamma		protein_coding	-0.4785	0.0001055	-0.09912	0.4576	-0.2092	0.117	-0.4073	0.003991	70.526	62.712	71.404	67.817	96.696	76.778	115.747	108.932	142.367	164.114	118.463	116.892	141.33	100.691	100.207	124.612	104.958	98.404	87.84	106.525
FBgn0027556	CG4928	UNC93A	protein_coding	1.765	0.0001063	0.09251	0.4326	0.0978	0.4775	1.37	0.004953	48.468	48.092	51.905	49.587	11.007	25.975	6.445	6.351	9.564	10.377	8.111	16.708	17.863	18.258	14.402	14.022	19.004	49.116	40.101	13.862
FBgn0035591	CG4611	PTCD1	protein_coding	-0.4237	0.0001072	0.02047	0.9413	-0.1018	0.4801	-0.2459	0.08014	13.181	13.741	14.393	15.444	19.775	22.692	17.889	18.761	18.647	18.615	15.807	16.007	22.641	16.109	16.294	15.165	14.949	11.486	16.929	13.148
FBgn0037282	CG14657		protein_coding	0.3514	0.0001073	0.1596	0.1385	0.1602	0.1807	0.1282	0.3392	46.865	43.37	47.525	47.91	34.283	37.711	34.738	35.149	33.111	39.555	39.701	49.15	46.735	40.039	46.941	46.011	39.772	48.338	42.976	35.628
FBgn0011509	SrpRbeta		protein_coding	-0.3418	0.0001081	-0.1191	0.3207	-0.2225	0.05004	-0.09378	0.5217	48.911	46.301	44.528	43.643	62.769	49.98	62.63	62.418	58.757	61.988	49.992	50.889	47.085	49.09	41.697	49.987	45.292	49.486	45.513	59.884
FBgn0250907	Cht10		protein_coding	-1.774	0.0001089	0.007082	0.9766	-0.02125	0.8962	0.2585	0.2058	0.092	0.265	0.128	0.085	0.506	1.291	0.209	0.314	0.452	0.748	0.299	0.712	0.549	0.358	0.344	0.651	0.301	1.408	0.763	0.803
FBgn0035243	CG13926	HIKESHI	protein_coding	-0.517	0.0001089	0.06833	0.6602	0.04304	0.8061	0.2115	0.185	18.178	22.931	16.584	16.69	27.664	27.663	27.585	29.655	34.119	33.57	27.796	32.547	38.877	37.035	24.726	34.921	40.592	32.999	43.052	40.796
FBgn0261356	CG42633		protein_coding	1.7	0.0001123	0.2381	0.1831	2.045	0.0006352	2.911	2.349e-07	6.427	2.984	1.716	1.896	0.842	1.152	0.575	0.817	0.74	1.389	0.912	1.92	2.466	3.106	4.187	4.044	6.953	7.801	14.286	4.935
FBgn0260855	Sec22	SEC22B	protein_coding	0.3622	0.0001127	0.1766	0.09715	0.2276	0.05006	0.4014	0.0004463	82.174	71.676	63.883	63.716	55.134	57.254	50.104	50.269	49.228	45.485	40.897	58.543	61.97	46.874	58.576	58.544	52.28	61.639	62.884	63.373
FBgn0043002	Chrac-14		protein_coding	-0.5559	0.0001127	-0.02365	0.9278	-0.2418	0.08468	-0.5342	0.001513	34.949	27.529	36.826	29.27	53.762	33.089	58.774	55.079	54.917	59.811	48.66	55.044	54.515	45.418	36.755	42.409	38.302	33.274	26.288	38.993
FBgn0263979	Caf1-55	RBBP7	protein_coding	-0.357	0.000113	-0.001984	1	-0.06261	0.6552	-0.2769	0.01535	105.685	110	130.023	118.077	131.808	124.45	176.374	177.63	159.999	166.177	152.165	155.451	160.918	160.392	159.603	138.689	145.214	126.688	126.914	125.577
FBgn0262867	Ptr		protein_coding	-2.973	0.0001133	-0.06468	0.597	-0.1055	0.4736	-0.2289	0.2755	0.229	0.101	0.125	0.148	1.67	0.814	1.753	2.181	3.139	4.339	0.319	1.893	1.379	0.104	1.705	1.446	0.062	1.296	1.361	0.133
FBgn0065099	snRNA:7SK		snRNA	1.609	0.0001144	0.01415	0.9358	0.04341	0.7586	0.006791	0.9826	23.395	12.988	11.383	16.827	3.315	3.131	6.47	5.388	1.073	2.278	1.272	0.348	2.605	2.275	2.042	2.217	2.163	2.998	1.178	1.238
FBgn0037546	mAChR-B		protein_coding	1.921	0.0001145	-0.0208	0.8879	0.003217	0.9907	0.2529	0.2363	0.724	0.333	0.462	0.391	0.122	0.167	0.042	0.084	0	0.095	0.075	0.032	0	0.081	0.113	0.051	0.046	0.221	0.19	0.101
FBgn0005619	Hdc	HDC	protein_coding	5.277	0.0001154	0.005125	0.9845	0.207	0.2905	0.2942	0.2122	0.111	0.197	0.246	0.131	0	0	0	0	0.031	0.024	0	0.04	0	0.02	0.142	0.29	0	0	0.41	0
FBgn0035571	CG12493		protein_coding	2.492	0.0001189	0.07388	0.5404	-0.03392	0.807	1.698	0.007199	4.791	2.009	3.041	2.462	0.474	0.211	0.517	0.502	2.234	0.314	0.306	1.975	2.465	1.656	0.155	0.839	0.819	0.227	2.564	13.536
FBgn0042092	CG13773		protein_coding	-0.4025	0.000119	-0.06064	0.7131	-0.06122	0.708	0.08236	0.6523	14.571	13.545	12.834	12.371	19.275	19.664	17.516	16.205	14.652	16.59	15.295	13.286	13.911	14.593	11.071	16.166	14.69	19.207	13.791	17.908
FBgn0023180	Orc6	ORC6	protein_coding	-0.5745	0.000119	-0.03975	0.8409	-0.04803	0.7886	-0.4247	0.01077	12.351	14.961	17.23	15.696	25.677	23.777	22.643	23.816	18.745	23.56	30.64	19.702	22.849	24.144	20.707	20.005	26.216	11.502	13.051	21.236
FBgn0052039	CG32039		protein_coding	0.4776	0.0001194	-0.01774	0.9559	0.07374	0.65	-0.0134	0.9594	31.313	26.694	29.751	34.634	22.648	21.323	20.068	19.55	22.033	22.653	25.645	24.542	19.17	24.433	25.11	29.196	24.983	27.797	21.079	22.181
FBgn0024943	PIP82		protein_coding	3.027	0.00012	0.0297	0.8518	0.04748	0.7537	0.03063	0.8805	0.125	0.11	0.254	0.169	0	0.038	0.02	0	0	0.022	0	0	0	0.038	0	0.03	0.018	0	0	0.015
FBgn0268063	ltl		protein_coding	-1.673	0.0001201	-0.6887	0.04328	-2.157	0.000183	-1.699	0.001248	0.352	0.476	0.362	0.489	2.046	2.535	0.808	0.851	3.827	2.664	2.762	0.789	1.689	0.7	0.706	0.509	0.557	0.583	0.987	0.654
FBgn0052369	CG32369		protein_coding	-0.8325	0.0001232	-0.05035	0.7268	-0.06185	0.7132	0.06024	0.8006	10.598	15.028	9.708	9.986	28.983	29.856	14.277	15.636	13.381	12.481	13.144	10.547	9.565	12.21	10.123	11.084	11.917	13.646	13.087	16.157
FBgn0063449	Uhg2		ncRNA	-0.6302	0.0001235	0.02751	0.9018	-0.01513	0.9473	0.357	0.03625	27.839	23.457	25.306	26.971	54.725	47.12	33.796	35.836	30.98	33.144	31.496	36.859	34.785	32.085	30.726	33.191	28.909	44.471	53.996	43.87
FBgn0024985	CG11448		protein_coding	0.324	0.0001237	0.05625	0.7155	0.1363	0.2446	0.1843	0.1112	41.283	47.927	42.753	48.52	35.07	39.396	32.705	34.051	32.883	30.164	30.412	34.351	35.746	30.458	40.38	31.812	35.131	39.449	34.252	35.638
FBgn0040942	CG12643		protein_coding	-1.731	0.0001237	-0.09408	0.4257	-0.01775	0.9162	-0.238	0.233	1.569	4.037	1.922	2.497	15.895	10.878	5.533	6.889	4.505	8.028	20.42	7.19	4.712	5.804	8.794	12.176	8.597	7.746	7.611	2.31
FBgn0066101	LpR1		protein_coding	-1.258	0.0001237	0.03944	0.7607	0.2126	0.1816	0.1475	0.4449	0.218	0.287	0.172	0.151	0.66	0.94	0.317	0.322	0.538	0.333	0.534	0.535	0.714	0.562	1.147	0.946	0.49	0.642	0.729	0.616
FBgn0263659	CR43650		ncRNA	2.51	0.0001239	0.001477	1	-0.05282	0.707	-0.06559	0.7321	0.508	0.289	0.472	0.489	0.063	0.056	0.07	0.05	0.252	0.256	0.035	0.312	0.178	0.067	0.139	0.178	0.014	0.205	0.151	0.035
FBgn0266449	Kr-h2	TMEM33	protein_coding	0.2858	0.000124	0.047	0.758	0.05292	0.6632	0.04404	0.7677	84.663	79.507	93.949	93.411	69.059	70.692	71.71	72.691	79.817	84.802	81.909	90.517	86.739	83.896	79.759	96.733	84.995	99.352	81.376	77.62
FBgn0034940	CG16787		protein_coding	-0.4131	0.000125	-0.1304	0.2842	-0.1216	0.3846	0.01229	0.9602	22.975	24.253	21.142	17.821	34.085	29.57	29.314	26.081	35.359	27.135	26.274	25.667	25.813	21.477	19.978	28.613	26.068	28.334	30.283	30.049
FBgn0052133	Ptip		protein_coding	-0.4755	0.000125	-0.009924	0.9792	-0.0807	0.606	-0.07839	0.683	7.335	8.154	8.137	8.342	10.983	13.155	11.203	11.322	12.34	12.927	8.694	12.098	11.742	9.458	12.204	7.993	9.997	11.812	11.249	8.425
FBgn0010198	RpS15Aa	RPS15A	protein_coding	-0.4166	0.0001252	-0.06285	0.6969	0.05174	0.7453	-0.01698	0.941	806.07	765.556	629.483	643.784	1096.11	899.682	974.469	972.459	911.823	905.655	1160.46	865.437	837.775	996.635	1020.54	1134.62	1042.17	987.784	1052.59	891.763
FBgn0039642	CG11882		protein_coding	0.7355	0.0001256	0.05058	0.7385	-0.001628	1	0.05915	0.8039	30.627	16.284	31.087	30.669	15.016	9.806	15.521	19.603	12.928	21.49	16.628	24.295	20.219	16.228	12.678	21.285	16.715	12.734	20.332	21.686
FBgn0037815	Rrp46	EXOSC5	protein_coding	-0.5139	0.0001258	-0.1111	0.3809	-0.1307	0.3682	-0.1691	0.3165	23.599	21.184	23.473	23.534	35.626	30.633	37.494	34.601	38.678	32.228	31.098	27.72	30.649	24.005	31.217	30.955	22.365	26.652	25.708	31.392
FBgn0032919	CG9253	DDX47	protein_coding	-0.7237	0.0001265	-0.1159	0.3323	-0.1647	0.2493	-0.266	0.1314	74.329	69.824	59.701	55.748	117.651	128.068	111.339	108.776	148.556	148.395	77.1	97.067	104.307	73.146	107.34	94.164	72.222	90.272	102.412	74.021
FBgn0031951	r2d2		protein_coding	0.3806	0.0001278	0.182	0.09249	0.3295	0.004024	0.2747	0.02855	48.576	37.575	47.966	48.582	32.85	31.341	37.853	33.923	34.921	27.507	33.777	43.397	41.308	36.394	43.426	48.927	39.583	46.892	45.031	32.143
FBgn0029689	CG6428	ASPG	protein_coding	-0.7393	0.0001286	-0.08391	0.5037	-0.02336	0.9081	0.1462	0.45	8.77	13.154	8.463	7.955	21.391	24.773	11.303	12.286	9.53	10.325	11.453	5.722	8.357	9.962	8.196	9.667	11.603	13.314	11.193	14.051
FBgn0030854	CG8289		protein_coding	-0.3086	0.0001299	-0.02437	0.9125	-0.2001	0.05916	-0.4005	4.856e-05	42.476	42.807	39.135	40.897	46.996	51.373	58.516	51.669	62.571	65.053	64.839	66.923	60.516	59.533	48.251	60.422	51.66	54.141	48.764	39.988
FBgn0027515	CG7115	PPM1L	protein_coding	0.3694	0.0001311	0.1927	0.071	0.0855	0.5492	0.228	0.08145	12.146	12.912	13.006	12.539	8.399	10.259	9.537	9.896	9.046	10.332	11.244	13.549	13.448	12.305	11.123	11.675	11.511	12.056	15.391	10.672
FBgn0260642	Antp		protein_coding	0.8805	0.0001311	0.1588	0.2007	0.2353	0.1309	1.442	2.703e-06	3.878	2.805	3.056	3.462	1.364	1.667	1.8	1.647	2.236	1.972	1.771	3.044	2.542	3.788	2.56	3.147	3.807	5.602	7.594	3.945
FBgn0029094	asf1	ASF1B,ASF1A	protein_coding	-0.3595	0.0001318	0.02421	0.9229	-0.04847	0.744	-0.1917	0.1268	53.066	47.113	58.404	57.359	72.202	64.196	77.986	70.402	72.56	74.675	82.192	75.423	85.007	77.502	64.338	74.987	76.019	58.898	67.344	67.317
FBgn0053303	CG33303	RPN1	protein_coding	-0.4027	0.000132	-0.06055	0.7117	-0.1651	0.1995	-0.2781	0.03016	72.115	78.43	75.883	68.783	91.289	78.428	118.218	116.56	104.999	106.318	76.374	91.815	92.42	77.842	79.432	84.456	75.252	70.17	77.917	76.145
FBgn0267431	Myo81F		protein_coding	2.969	0.0001323	-0.04243	0.7471	-0.02506	0.8688	-0.03551	0.8615	0.157	0.269	0.053	0.096	0.015	0.014	0.012	0.011	0	0.042	0.039	0.047	0	0	0	0	0.045	0.041	0	0.028
FBgn0035371	AhcyL1	AHCYL1,AHCYL2	protein_coding	0.4266	0.0001342	0.07494	0.6229	0.02644	0.8848	0.1082	0.5094	401.05	259.905	323.77	334.825	232.958	202.182	257.352	250.708	232.969	245.818	212.894	271.544	271.871	235.314	245.391	238.805	234.467	256.584	256.315	253.514
FBgn0027615	CG6404	OXA1L	protein_coding	-0.3552	0.0001346	-0.1118	0.3696	-0.02891	0.8562	-0.2782	0.0196	28.084	28.496	31.35	29.421	36.007	37.805	40.703	39.822	40.264	32.614	41.396	32.316	33.441	33.249	42.636	31.716	36.32	22.72	33.847	31.879
FBgn0262353	CR43051		ncRNA	2.961	0.0001369	0.057	0.6255	0.03787	0.7885	-0.1281	0.4907	1.203	0.089	1.226	0.887	0.058	0.109	0.143	0	0.631	0.975	0.817	1.637	1.431	1.373	0.641	1.957	0.783	1.411	0.231	0.216
FBgn0260639	gammaTub23C	TUBG1	protein_coding	-0.4634	0.0001373	-0.008387	0.9821	-0.1431	0.3019	-0.227	0.1237	31.572	28.921	34.925	31.832	41.551	38.747	53.274	50.35	56.647	56.523	46.852	51.34	57.774	48.264	41.166	41.844	49.346	41.439	44.818	41.823
FBgn0028506	CG4455		protein_coding	0.3759	0.000139	0.06155	0.7036	0.1055	0.4346	0.05022	0.7882	72.049	61.828	66.475	76.136	58.87	47.316	47.104	53.181	50.269	44.058	48.593	49.323	50.418	56.349	59.216	50.098	52.978	51.217	48.014	50.517
FBgn0259878	Fs		protein_coding	-1.228	0.0001413	-0.06975	0.5425	-0.0516	0.7399	-0.006747	0.9859	10.999	19.531	14.471	13.329	30.754	42.012	40.174	42.239	23.543	29.236	28.321	11.84	16.079	26.907	21.845	17.315	26.03	32.517	25.781	21.608
FBgn0032033	CG13392		protein_coding	-0.4661	0.0001452	-0.08786	0.5273	-0.1211	0.4124	-0.2545	0.1102	7.849	8.376	9.781	9.125	12.949	12.6	13.822	11.815	10.462	11.671	11.918	8.543	9.409	10.451	9.637	7.475	10.975	5.197	7.092	11.26
FBgn0033391	CG8026	SLC25A32,AC012213.5	protein_coding	-0.5136	0.000146	-0.002651	1	-0.2284	0.09543	-0.1373	0.4317	34.307	29.539	36.415	39.597	60.791	49.407	48.582	52.269	45.803	39.017	32.796	45.205	42.564	29.267	28.319	32.089	27.252	37.141	37.147	27.555
FBgn0259113	DNApol-alpha180	POLA1	protein_coding	-0.4485	0.000146	0.0048	0.9934	-0.0863	0.5678	-0.1219	0.464	24.066	27.762	31.171	30.074	38.327	41.495	40.992	40.599	32.888	38.168	36.857	33.232	36.148	39.426	31.685	24.965	38.99	27.114	29.159	38.973
FBgn0025629	CG4045	METTL1	protein_coding	-0.4145	0.0001466	-0.05846	0.7228	-0.05329	0.744	0.03783	0.8582	32.655	33.738	32.477	31.221	50.076	39.266	44.929	45.933	38.965	37.266	48.234	38.818	34.088	40.58	38.701	40.801	36.81	34.896	40.523	51.541
FBgn0027343	fz3		protein_coding	1.194	0.000147	-0.008837	0.9729	0.1221	0.386	0.134	0.4935	2.696	3.767	3.098	2.527	1.036	1.849	0.923	0.849	2.812	3.06	1.309	2.735	2.638	1.397	5.254	4.194	1.625	4.928	3.088	1.901
FBgn0004198	ct		protein_coding	1.846	0.000147	0.07454	0.5169	-0.02502	0.8711	0.001503	1	5.357	1.652	3.492	3.449	0.314	0.585	1.333	1.022	1.648	1.991	0.645	3.777	3.045	1.036	1.493	1.39	0.69	1.853	2.054	0.425
FBgn0030092	fh		protein_coding	-0.5735	0.0001478	-0.06977	0.6384	-0.0573	0.7438	-0.1186	0.539	14.145	17.202	12.133	11.649	24.206	23.231	20.164	19.969	16.7	18.552	25.037	15.494	20.215	15.844	22.886	18.587	14.262	12.922	20.315	18.38
FBgn0266486	CG45085		protein_coding	-0.513	0.0001479	-0.002423	1	-0.2279	0.09604	-0.1368	0.4336	35.21	30.316	37.339	40.639	62.369	50.686	49.805	53.606	46.967	40.044	33.642	46.395	43.684	30.037	29.064	32.934	27.969	38.118	38.125	28.28
FBgn0039854	CG1635	ACOT9	protein_coding	-0.3746	0.0001484	-0.06354	0.6919	-0.06666	0.6642	-0.07618	0.668	10.285	9.848	11.555	11.032	13.059	14.61	14.113	15.406	11.847	15.922	13.799	11.473	14.198	12.098	11.245	14.946	11.928	14.273	10.814	13.886
FBgn0053519	Unc-89		protein_coding	-1.949	0.0001492	-0.02499	0.8603	-0.05535	0.6952	-0.1165	0.5354	0.064	0.129	0.071	0.038	0.476	0.249	0.326	0.369	0.682	0.846	0.325	0.699	0.541	0.176	0.793	0.408	0.089	0.341	0.671	0.189
FBgn0032474	DnaJ-H		protein_coding	0.5614	0.0001493	0.1334	0.2649	0.1205	0.4183	0.7478	4.044e-05	32.601	25.106	32.085	33.12	18.238	19.164	20.365	20.387	18.186	19.399	22.375	24.552	31.703	22.342	18.758	28.88	25.27	28.014	28.112	52.918
FBgn0032922	CG9249		protein_coding	-0.6734	0.0001494	-0.06544	0.6494	-0.07714	0.6361	-0.3299	0.06297	7.275	8.193	6.327	5.6	12.47	13.606	10.181	10.989	11.517	11.313	15.863	12.616	8.146	11.602	14.132	7.858	11.443	5.999	8.105	10.837
FBgn0015838	Vang	VANGL2,VANGL1	protein_coding	0.3596	0.0001499	0.1843	0.07839	0.3882	0.0002973	0.3499	0.002202	94.043	99.456	81.701	86.245	72.952	75.199	60.201	65.543	61.146	60.364	57.422	76.997	73.472	71.5	97.258	83.668	71.766	90.636	83.552	65.965
FBgn0039152	Root		protein_coding	2.708	0.0001523	0.8312	0.0613	0.6919	0.07316	1.926	0.007293	0.333	0.494	0.214	0.161	0.04	0.079	0.005	0.01	0.064	0.05	0.007	0.542	0.125	0.084	0.171	0.183	0.279	0.539	0.124	0.346
FBgn0261808	cu	NOCT	protein_coding	-0.7972	0.0001537	-0.1764	0.1765	-0.00812	0.9735	-0.09721	0.6518	0.55	0.771	0.914	0.733	1.438	1.501	1.244	1.573	0.659	1.272	1.484	1.187	0.391	0.669	1.672	0.794	1.113	0.327	1.126	1.201
FBgn0038353	CG5399		protein_coding	2.617	0.000154	0.0242	0.8635	0.06186	0.6552	0.1388	0.4573	0.441	0.422	3.141	1.706	0.169	0.28	0.157	0.095	2.927	1.725	0.299	3.596	2.02	1.458	3.167	4.936	0.478	3.099	5.668	0.83
FBgn0263755	Su(var)3-9	SUV39H1	protein_coding	-0.3525	0.0001541	-0.1058	0.4028	-0.01504	0.9354	-0.1982	0.1153	16.772	18.494	19.354	21.655	22.497	23.568	27.436	26.73	31.394	28.331	24.039	23.431	25.016	24.133	31.31	26.461	24.486	23.317	24.719	22.242
FBgn0017418	ari-1	ARIH1	protein_coding	0.3492	0.0001557	0.01604	0.9582	-0.03846	0.7966	-0.0284	0.8831	28.222	23.745	27.589	28.686	19.789	23.71	19.267	19.949	20.157	20.724	23.28	23.254	21.117	21.513	20.223	17.483	23.27	20.566	22.272	19.899
FBgn0086444	l(2)37Cb	DHX16	protein_coding	-0.2619	0.0001577	-0.05688	0.693	0.04964	0.6884	-0.176	0.09418	16.077	17.446	17.203	17.141	19.502	19.129	23.063	20.926	19.67	15.85	17.699	16.932	16.081	16.622	18.061	19.755	18.286	15.546	16.4	14.441
FBgn0038597	CG8064	WDR3	protein_coding	-0.403	0.0001614	-0.07433	0.6267	-0.05203	0.7453	-0.1828	0.2019	22.159	21.451	20.12	20.148	27.625	27.425	30.291	29.635	29.433	24.76	20.444	25.287	21.891	19.287	25.752	22.187	21.463	22.114	19.024	21.64
FBgn0265843	CR44632		ncRNA	1.934	0.0001619	1.054	0.03393	0.04468	0.7499	0.548	0.07773	7.915	4.111	6.941	5.188	0.993	0.758	1.672	1.806	0.692	0.119	0.133	2.493	1.12	0.652	0.468	0.079	0.715	1.031	0.675	1.222
FBgn0037980	DCAF12		protein_coding	0.5422	0.0001619	-0.0004096	1	0.1716	0.2234	0.2289	0.1741	7.765	7.798	9.298	9.035	5.742	4.332	5.993	5.898	6.215	5.139	6.93	6.839	5.244	6.349	10.897	5.904	7.67	7.718	6.963	8.917
FBgn0035756	unc-13-4A	BAIAP3	protein_coding	1.264	0.000165	0.1025	0.3792	0.1825	0.2282	2.519	1.82e-09	18.608	14.97	8.382	8.827	4.611	6.24	3.856	3.803	2.811	3.285	4.147	5.852	4.545	6.722	6.177	5.558	6.351	23.196	19.521	22.096
FBgn0031008	CG8010		protein_coding	-0.4083	0.0001662	-0.1529	0.1868	-0.2507	0.04647	0.006821	0.9822	22.681	21.833	19.813	20.069	31.649	29.724	26.881	27.855	26.399	28.328	26.885	20.901	19.905	24.507	20.209	19.896	21.936	21.354	24.265	34.442
FBgn0040384	CG32795	TMEM120B,TMEM120A	protein_coding	-0.4699	0.0001662	0.03328	0.8824	0.05592	0.7413	-0.1666	0.3103	4.248	3.286	3.624	4.062	4.467	6.062	5.936	5.524	7.05	6.066	8.272	7.901	7.826	7.36	8.204	7.546	7.839	5.065	7.907	5.164
FBgn0039566	CG4849	EFTUD2	protein_coding	-0.3368	0.0001662	-0.03257	0.8769	-0.1295	0.2892	-0.2753	0.01432	33.998	33.044	40.251	36.447	40.807	40.889	53.957	50.472	48.924	47.795	41.845	43.517	46.929	41.853	42.443	39.92	38.668	31.878	36.264	40.869
FBgn0031040	CG14210		protein_coding	-0.5684	0.0001675	-0.08425	0.5382	-0.2774	0.0548	-0.214	0.2095	39.193	29.008	23.594	26.353	57.402	43.921	41.029	43.488	45.366	57.095	42.112	36.226	46.922	35.908	32.939	33.861	32.566	39.436	31.829	41.466
FBgn0010173	RpA-70	RPA1	protein_coding	-0.2781	0.0001727	-0.04155	0.798	-0.03877	0.7509	0.1385	0.1871	199.041	199.874	205.503	179.084	237.644	258.884	227.892	239.466	243.306	235.973	216.748	228.799	211.626	221.844	225.065	225.042	214.833	250.357	247.037	278.74
FBgn0030839	CG5613	ENGASE	protein_coding	-0.5608	0.0001736	0.01885	0.9468	-0.04769	0.7901	-0.3833	0.02454	3.962	3.702	4.545	4.185	7.01	5.986	6.173	6.652	4.422	5.473	6.433	5.666	5.641	6.015	4.787	3.965	6.114	4.526	3.628	3.197
FBgn0035811	CG12262		protein_coding	0.5115	0.0001742	-0.0656	0.6776	-0.04002	0.8226	-0.3179	0.03679	124.481	135.607	137.046	128.659	66.003	74.398	110.99	97.284	88.928	98.704	110.465	80.548	81.787	98.612	96.31	80.53	102.119	71.422	68.656	76.91
FBgn0026361	Sep5	SEPT10	protein_coding	-0.5342	0.0001753	0.02601	0.9149	-0.02172	0.9172	-0.02745	0.912	11.422	11.212	12.796	11.791	17.809	13.765	21.145	20.037	21.102	19.946	14.667	18.905	22.63	17.288	15.812	19.606	17.711	18.45	21.272	14.405
FBgn0035437	Strip	STRIP2,STRIP1	protein_coding	0.2385	0.0001753	0.1453	0.105	0.09457	0.3366	0.2006	0.01838	41.197	41.587	44.526	43.924	32.501	36.261	36.936	38.191	34.713	36.288	37.141	45.17	40.022	39.056	40.469	38.788	39.161	44.901	42.442	39.803
FBgn0051368	CG31368	AQR	protein_coding	-0.2717	0.0001753	0.01771	0.9413	-0.03764	0.7583	-0.1368	0.1994	29.957	29.989	32.308	29.655	32.774	37.951	39.943	38.599	35.932	36.43	32.218	37.258	36.776	32.879	34.934	32.562	32.543	29.609	32.906	30.837
FBgn0039829	CG15561		protein_coding	-0.7434	0.0001755	-0.1031	0.3846	-0.09549	0.5351	-0.187	0.3157	18.167	16.242	9.298	9.253	31.421	27.111	18.201	19.899	15.715	20.411	13.772	13.234	10.705	12.385	13.673	14.026	12.152	12.317	12.999	12.559
FBgn0010220	Dbp45A	DDX49	protein_coding	-0.4537	0.0001763	-0.08129	0.5759	-0.06579	0.6901	0.05574	0.7882	22.535	26.424	21.51	25.226	35.139	42.386	28.708	31.051	28.453	28.527	35.299	24.691	21.888	33.178	26.819	25.572	31.269	32.357	35.239	30.571
FBgn0085188	CG34159		protein_coding	0.3928	0.0001766	0.06667	0.6741	0.1135	0.4156	0.1713	0.2412	53.488	50.252	46.901	48.764	36.729	36.938	36.698	36.134	28.245	33.997	46.302	37.949	41.524	42.591	49.787	37.868	40.244	46.072	39.121	44.496
FBgn0001189	hfw		protein_coding	0.4852	0.0001769	0.09928	0.4525	0.1194	0.4159	0.4276	0.004389	19.17	24.098	18.952	19.467	14.169	16.516	11.346	13.35	12.23	8.688	13.539	15.759	10.623	15.296	11.579	12.639	16.629	17.261	19.199	15.217
FBgn0010803	TrpRS	WARS	protein_coding	-0.308	0.000177	-8.644e-05	1	-0.001361	1	0.1169	0.3553	41.383	44.782	40.863	37.155	53.001	60.748	45.795	47.605	50.38	45.684	48.786	46.157	51.617	46.958	50.315	47.678	46.87	50.929	49.032	58.637
FBgn0015270	Orc2	ORC2	protein_coding	-0.5257	0.000177	-0.03872	0.8518	-0.06805	0.6898	-0.2176	0.1807	18.48	19.455	21.707	20.55	30.497	26.483	32.346	33.279	30.682	29.365	34.722	28.101	27.541	31.473	23.177	24.182	36.763	20.014	24.91	29.386
FBgn0037636	CG9821		protein_coding	0.8088	0.0001772	-0.001346	1	0.0537	0.7558	0.01427	0.961	284.447	271.283	112.544	153.201	148.116	128.605	77.143	71.108	63.584	65.444	99.922	70.04	62.186	95.55	70.82	81.186	111.677	83.498	71.828	78.989
FBgn0036020	CG8336		protein_coding	-0.4702	0.0001816	-0.07906	0.5896	-0.1793	0.1912	-0.2405	0.1165	17.339	19.875	15.783	17.098	27.441	28.061	23.39	23.155	22.37	18.841	24.566	16.429	18.845	21.258	17.857	14.813	19.262	17.315	13.912	20.084
FBgn0265297	pAbp		protein_coding	0.5992	0.0001844	0.0443	0.8112	0.09498	0.5447	0.05791	0.8008	1870.3	1378.01	897.902	951.393	934.468	830.452	683.794	685.264	830.122	832.675	627.954	929.566	823.237	807.466	904.271	933.593	878.985	875.159	815.299	767.943
FBgn0028997	nmdyn-D7	NME7	protein_coding	0.4933	0.0001852	0.1778	0.1311	0.02699	0.8937	0.4027	0.01262	11.744	8.934	10.572	9.201	7.308	5.771	6.946	7.112	6.759	6.211	5.128	8.099	8.975	7.592	3.778	6.277	7.8	10.9	8.268	8.335
FBgn0086451	l(2)k09022	HEATR1	protein_coding	-0.6378	0.000187	-0.0408	0.8284	-0.1346	0.3572	-0.2189	0.2112	16.339	17.177	16.598	15.424	23.704	29.35	29.1	27.989	32.403	30.921	15.797	26.535	26.774	17.386	24.739	19.491	17.746	19.454	19.883	21.146
FBgn0061196	CG15468		protein_coding	2.431	0.0001939	0.04081	0.7339	0.1284	0.4099	0.464	0.1102	3.406	1.588	1.652	1.831	0.382	0.335	0.135	0.337	0.298	0.23	0.257	0.129	1.157	0.194	0.151	0.718	1.108	0.887	1.853	0.407
FBgn0036740	Vps60	CHMP5	protein_coding	0.3324	0.0001939	0.005318	0.9915	0.1268	0.3033	0.1319	0.3195	144.125	113.236	125.807	131.044	104.733	95.135	96.438	102.11	73.942	81.099	99.104	77.78	80.971	97.56	89.839	105.057	96.689	86.149	92.733	105.148
FBgn0036897	CG8786		protein_coding	0.31	0.0001939	0.1664	0.1056	0.0423	0.7642	0.0922	0.5085	18.345	15.933	19.32	19.095	13.848	13.149	14.992	15.507	14.939	16.025	14.851	19.442	18.145	17.488	16.848	15.164	16.293	17.141	15.211	17.199
FBgn0037440	CRAT	CRAT	protein_coding	-0.3688	0.0001939	0.06287	0.6929	0.1081	0.4238	-0.002315	0.9979	8.652	11.399	10.368	9.097	11.917	13.291	14.344	13.353	12.729	15.507	16.002	16.74	15.977	16.144	19.586	17.138	14.427	16.831	14.618	13.675
FBgn0033051	Strica		protein_coding	-1.452	0.0001943	-0.372	0.09464	-2.256	0.0001295	-1.732	0.0008809	0.282	0.369	0.219	0.115	0.734	0.329	0.863	1.231	2.189	0.913	0.925	0.454	0.893	0.343	0.133	0.181	0.326	0.391	0.577	0.112
FBgn0029866	CG3842		protein_coding	0.6765	0.0002012	-0.03498	0.8409	0.002981	0.9955	0.09012	0.6788	2.662	2.552	2.468	2.305	1.7	1.067	1.279	1.699	1.645	1.705	0.952	1.235	1.472	0.96	1.977	1.521	0.94	1.548	1.854	1.443
FBgn0000180	bib		protein_coding	1.614	0.0002013	0.02687	0.8516	-0.02175	0.8928	0.129	0.4952	1.222	1.362	2.707	3.43	0.579	0.688	0.556	0.595	1.418	1.348	0.909	2.074	1.907	0.807	1.384	1.052	0.767	2.031	2.595	1.007
FBgn0000283	Cp190		protein_coding	-0.309	0.0002026	-0.0006392	1	-0.1439	0.205	-0.1946	0.07658	64.716	70.761	73.451	74.102	80.675	90.676	93.206	93.168	82.47	88.926	75.187	82.309	86.762	77.256	75.605	69.748	69.3	73.725	74.969	61.865
FBgn0024804	Dbp80		protein_coding	-0.6647	0.0002064	-0.0671	0.641	-0.3154	0.04451	-0.1585	0.3956	17.194	13.94	17.186	17.134	23.672	25.767	31.297	31.858	50.01	41.924	35.014	36.538	39.291	29.252	23.671	29.117	28.614	27.777	27.736	47.007
FBgn0038202	CG12402		protein_coding	3.744	0.0002065	0.0232	0.8775	0.08135	0.5766	0.09749	0.6012	1.102	0.144	0.413	0.199	0	0.009	0.023	0.053	0.274	0.291	0.015	0.489	0.366	0.089	0.626	0.814	0.042	0.459	0.752	0.018
FBgn0030611	CG15027		protein_coding	-0.5906	0.000209	-0.1536	0.1947	-0.2197	0.1272	-0.3763	0.02902	18.104	17.409	18.354	15.956	30.048	27.972	27.891	26.96	33.234	24.902	22.092	22.319	17.87	17.297	16.868	23.101	16.318	16.361	12.165	22.317
FBgn0029990	CG2233		protein_coding	1.521	0.0002113	0.1979	0.2054	-0.005518	0.9812	0.0004832	1	118.626	130.308	266.054	226.101	20.731	58.871	69.9	71.118	42.405	32.375	31.503	61.357	83.16	86.005	15.315	18.793	68.32	18.705	20.942	66.267
FBgn0015905	ast		protein_coding	-0.3245	0.0002128	0.07008	0.641	-0.1745	0.154	-0.09316	0.5434	11.259	12.404	11.263	11.71	15.122	15.589	14.665	14.399	13.058	12.598	9.353	12.434	12.853	12.626	7.795	10.357	10.171	9.212	10.91	11.035
FBgn0040308	Jafrac2	PRDX4	protein_coding	-0.39	0.0002196	-0.0323	0.8848	-0.1014	0.4671	-0.2237	0.09634	56.047	45.999	45.647	40.438	60.166	56.32	70.977	67.549	68.077	76.978	72.616	74.665	67.947	64.615	64.535	72.098	55.947	51.352	52.929	71.455
FBgn0039111	PTPMT1	PTPMT1	protein_coding	-0.4423	0.0002196	-0.006327	0.9878	0.05911	0.7225	0.109	0.536	14.908	17.701	14.66	14.461	24.226	20.945	20.722	22.054	20.182	20.409	28.655	24.149	20.687	24.375	21.902	30.767	23.721	24.177	29.633	24.359
FBgn0083990	sphinx		ncRNA	2.295	0.0002212	0.7308	0.07093	2.929	0.001425	2.061	0.00521	2.482	1.137	0.883	0.61	0.291	0.25	0.066	0.179	0	0.074	0.291	1	0.562	1.07	1.468	2.093	1.794	2.802	0.635	0.791
FBgn0037298	CG2604	SCCPDH	protein_coding	-0.449	0.0002218	0.03461	0.8768	0.04093	0.8105	0.1307	0.4329	40.019	58.502	41.605	43.303	65.534	61.616	72.563	63.078	60.574	54.258	54.399	57.09	63.24	59.873	63.997	63.593	52.775	56.8	61.391	73.571
FBgn0031419	CG15390		protein_coding	0.7135	0.0002248	1.223	2.541e-05	1.125	0.0001091	0.7033	0.002688	10.906	8.528	13.76	12.975	7.676	5.853	5.574	6.616	6.281	5.544	5.804	17.621	15.191	10.456	12.101	18.149	10.415	7.45	13.936	11.964
FBgn0263199	Galk	GALK2	protein_coding	-0.4007	0.0002268	-0.03594	0.8698	-0.1717	0.1909	-0.1728	0.2415	9.154	8.421	10.118	8.926	11.278	11.871	14.258	12.841	14.28	13.807	13.932	12.182	13.76	13.52	10.035	11.626	12.474	10.583	11.688	12.956
FBgn0266895	CR45355		ncRNA	2.044	0.0002285	0.243	0.2203	0.06986	0.6152	0.7593	0.05082	15.307	13.147	12.433	11.287	1.348	4.166	1.97	2.619	0	0.689	1.539	1.735	6.065	2.037	2.716	0	2.49	5.982	1.469	5.032
FBgn0037021	CG11399	PCIF1	protein_coding	-0.4559	0.0002292	0.01043	0.9778	-0.02487	0.8975	-0.06801	0.7319	13.79	19.803	12.253	12.81	20.331	25.697	19.63	18.868	20.632	19.803	21.438	22.073	20.149	20.953	20.119	16.577	22.727	19.773	19.552	18.49
FBgn0051118	RabX4		protein_coding	0.6461	0.0002297	0.0164	0.9561	0.1989	0.1657	0.05701	0.8108	20.685	20.504	16.271	18.799	13.052	14.728	8.143	8.915	8.999	12.081	15.412	13.524	9.885	15.256	18.056	17.73	16.378	12.783	15.701	11.515
FBgn0036483	CG12316		protein_coding	0.4346	0.0002304	0.01006	0.9792	0.05106	0.7646	0.409	0.003562	13.115	16.673	11.805	12.723	10.779	11.599	7.783	8.256	8.941	8.773	8.179	8.247	8.87	9.168	9.683	8.566	9.675	14.215	12.475	11.065
FBgn0000057	adp	WDTC1	protein_coding	0.3125	0.0002312	0.1652	0.1197	0.1301	0.2899	0.2518	0.02814	20.701	22.413	25.499	24.006	17.647	16.912	18.613	20.096	16.998	13.97	19.298	17.796	20.651	22.285	19.074	18.372	20.407	20.566	19.751	21.938
FBgn0000084	AnxB10		protein_coding	-1.093	0.0002316	-0.0216	0.9062	-0.1604	0.2692	-0.2835	0.1468	12.563	5.388	9.973	9.767	20.355	8.573	29.881	32.553	45.457	38.425	15.977	32.448	31.724	23.556	18.467	22.502	20.73	20.493	19.192	19.834
FBgn0283450	Glo1	GLO1	protein_coding	-0.3866	0.0002316	-0.1959	0.06895	-0.2101	0.09249	-0.2462	0.06115	109.859	98.548	94.073	76.821	119.029	109.127	148.459	136.578	158.948	140.507	147.414	111.967	129.329	107.497	113.581	121.361	121.766	113.871	111.706	131.042
FBgn0025525	bab2		protein_coding	-0.7825	0.0002338	-0.1015	0.391	-0.08094	0.6072	-0.5241	0.01177	19.876	28.466	20.17	24.935	45.39	50.261	39.696	42.292	29.535	34.312	37.397	27.594	24.128	21.431	34.899	27.415	20.412	21.661	23.189	11.967
FBgn0058006	CG40006		protein_coding	1.051	0.0002404	0.004827	0.9878	-0.03725	0.8192	0.1608	0.4013	5.128	4.782	3.884	3.709	1.844	3.4	1.015	1.137	2.023	2.06	3.489	3.637	1.831	2.49	2.31	1.711	2.538	3.392	3.181	4.103
FBgn0267390	dop		protein_coding	0.3036	0.0002411	0.03605	0.8518	0.0749	0.5501	0.2011	0.06723	23.375	26.647	26.802	27.513	19.86	23.067	20.003	20.038	20.524	19.205	19.259	20.021	21.832	19.931	24.913	17.535	21.797	21.754	24.317	23.331
FBgn0086917	spok		protein_coding	2.785	0.0002426	0.0146	0.9335	-0.118	0.4593	-0.3447	0.1775	2.602	2.668	0.925	1.528	0.148	0.192	0.229	0.229	0.27	0.26	0.058	0.262	0.327	0.176	0.103	0.07	0	0	0	0.035
FBgn0026430	Grip84	TUBGCP2	protein_coding	-0.2614	0.0002465	-0.01956	0.9317	-0.02164	0.8688	-0.1084	0.3383	14.29	15.162	15.702	15.18	16.625	17.731	19.691	19.306	17.012	16.352	18.167	15.961	17.129	17.217	18.828	14.608	17.015	14.907	15.181	16.87
FBgn0005638	slbo		protein_coding	1.44	0.0002502	0.05685	0.6242	0.1501	0.3077	0.5186	0.05431	2.414	4.698	2.223	2.884	1.456	1.209	0.45	0.727	2.009	1.849	0.719	2.993	2.533	1.478	2.799	3.534	1.962	3.726	5.445	1.6
FBgn0024733	RpL10	RPL10,RPL10L	protein_coding	-0.4121	0.0002502	-0.09236	0.5016	0.003548	0.9926	-0.1507	0.3165	1724.25	1745.97	1626.35	1647.64	2383.03	2109.08	2490.16	2363.14	2256.29	2145.73	3003.85	1934.03	1851.53	2634.43	2286.03	2541.12	2617.8	2064.22	2070.73	2290.38
FBgn0039744	CG15526		protein_coding	4.005	0.0002512	0.006755	0.9792	0.01419	0.9361	0.07293	0.6977	6.318	4.518	6.128	4.77	0.405	0	0.143	0.195	0	0.487	0.091	0.273	0	0.412	0	0	0.652	0	0	1.079
FBgn0034618	CG9485	AGL	protein_coding	-0.7148	0.0002533	-0.07081	0.5974	-0.4274	0.02311	-0.1818	0.3276	3.644	2.712	4.945	4.413	7.828	5.025	7.545	7.895	8.09	6.968	5.639	6.469	5.224	4.826	3.335	4.057	4.573	3.103	3.977	8.486
FBgn0020503	CLIP-190		protein_coding	-0.3823	0.0002548	-0.1113	0.3809	-0.04036	0.7987	-0.1891	0.1677	10.733	9.979	12.242	12.526	16.647	15.77	14.03	14.916	16.744	17.192	17.123	14.33	14.44	14.871	16.848	16.136	15.391	13.843	15.729	13.455
FBgn0052187	CG32187		protein_coding	-1.679	0.0002563	-0.07817	0.4983	-0.1518	0.314	-0.1192	0.5284	1.862	2.42	2.391	1.799	9.325	4.777	9.703	8.77	6.826	5.757	7.9	3.028	2.53	5.626	3.555	2.692	4.01	2.007	2.367	8.704
FBgn0040348	CG3703	RUNDC1	protein_coding	-0.8614	0.0002582	-0.176	0.1745	-0.1762	0.2227	-1.341	5.805e-05	3.479	4.179	3.375	3.22	7.85	6.028	7.424	7.667	7.061	7.148	7.509	4.084	5.747	3.518	5.303	5.72	3.403	3.519	3.615	1.223
FBgn0052865	alphagamma-element:CR3286		ncRNA	3.015	0.0002629	0.1715	0.3416	0.2627	0.2303	0.2332	0.2799	1.255	0.185	0.584	0.509	0.072	0.023	0.119	0	0.088	0	0	0.341	0.085	0.115	0.134	0.181	0.218	0.196	0.289	0
FBgn0041096	rols		protein_coding	-1.169	0.0002687	-0.09996	0.3864	-0.08846	0.5343	-0.2372	0.2181	2.321	4.294	3.338	2.9	8.165	13.674	5.649	5.757	5.311	5.55	8.712	3.086	3.598	5.307	4.704	3.795	5.308	3.558	4.829	3.588
FBgn0023395	Chd3		protein_coding	-0.4685	0.000271	0.02472	0.9255	-0.1744	0.204	-0.3411	0.02049	18.412	18.138	22.641	18.265	24.463	24.629	32.264	31.689	31.656	29.066	25.222	29.971	35.238	25.016	21.527	24.486	22.163	17.451	21.498	22.408
FBgn0028480	CG17841		protein_coding	0.3685	0.0002711	0.07009	0.6511	0.07098	0.633	0.6385	2.609e-07	25.256	22.21	19.397	18.118	16.263	18.938	13.676	14.659	17.662	17.3	15.355	19.615	17.667	18.521	17.054	17.461	20.157	29.101	29.488	24.398
FBgn0263343	CR43424		ncRNA	3.836	0.0002724	0.9694	0.0582	3.184	0.004877	0.6297	0.07728	0.447	1.217	0.455	0.618	0.043	0.061	0	0	0	0	0	0.506	0.379	0	0.832	0.404	0.678	0.524	0.086	0.04
FBgn0031745	rau		protein_coding	1.903	0.0002726	0.009209	0.9652	-0.0752	0.5829	-0.05926	0.7721	157.599	113.467	180.279	172.79	23.249	25.448	43.081	43.423	48.937	43.267	7.539	46.168	53.196	12.575	23.985	24.907	10.747	34.624	37.826	4.927
FBgn0284221	Sema5c		protein_coding	0.5278	0.000273	0.2088	0.07964	0.7815	4.895e-05	0.3766	0.01627	51.397	72.65	74.995	80.106	45.436	43.446	44.121	48.762	48.64	43.96	41.395	63.325	59.987	65.162	96.142	77.799	69.362	73.028	72.293	50.178
FBgn0028554	x16	SRSF3	protein_coding	-0.2876	0.000278	-0.1353	0.2022	-0.1684	0.1176	-0.4071	1.674e-05	82.523	80.001	73.172	68.263	95.642	87.798	101.27	92.47	103.16	100.975	115.973	88.929	92.759	95.669	89.496	91.114	94.029	78.651	74.646	80.069
FBgn0029856	CG11700	UBB	protein_coding	-0.8457	0.0002787	-0.01362	0.9592	-0.0807	0.5968	-0.09606	0.6555	1.813	1.546	3.42	3.227	4.611	3.72	5.406	6.512	6.033	3.781	3.959	4.649	3.057	5.021	3.062	4.518	3.091	4.104	4.513	3.049
FBgn0036929	CG7668		protein_coding	-0.5762	0.0002815	0.04023	0.8369	-0.0253	0.9003	0.01609	0.9524	44.632	31.658	47.065	43.543	68.398	53.892	76.908	68.178	68.187	66.327	53.36	79.798	74.828	53.403	54.523	68.057	56.033	60.874	59.663	70.601
FBgn0030345	CG1847	AIPL1,AIP	protein_coding	0.4067	0.0002834	0.05779	0.7268	0.2123	0.1069	0.1662	0.2866	16.732	15.106	19.724	20.539	13.003	12.787	13.691	12.806	12.807	11.444	15.439	12.87	14.329	16.714	20.318	14.067	17.217	11.841	14.948	18.774
FBgn0053094	Synd	PACSIN1,PACSIN2,PACSIN3	protein_coding	0.2989	0.0002834	0.1534	0.1415	0.1098	0.3568	0.235	0.02843	33.393	36.778	39.706	38.293	26.837	31.461	29.88	30.195	31.895	36.655	36.136	36.708	41.144	45.616	38.79	35.521	42.886	44.629	40.465	42.483
FBgn0037880	CG17726	NDUFAF7	protein_coding	-0.4543	0.0002837	-0.1502	0.2027	-0.0764	0.6357	-0.05824	0.7875	7.433	9.467	6.963	7.887	11.793	11.183	12.175	10.709	10.396	12.01	10.496	6.576	9.277	9.045	9.781	10.045	9.383	6.423	10.488	12.179
FBgn0010926	l(3)07882	NOP14	protein_coding	-0.4642	0.0002838	-0.1092	0.396	-0.1895	0.1625	-0.1525	0.3547	19.337	18.419	16.88	17.343	25.471	31.155	24.087	23.813	30.082	26.834	18.362	22.548	22.813	16.676	20.255	20.621	18.075	22.023	23.307	18.993
FBgn0030658	CG7872	DNAJC25	protein_coding	-0.4735	0.0002843	-0.2562	0.03118	-0.2658	0.04742	-0.5038	0.000757	60.42	75.536	58.121	60.124	101.495	83.738	95.675	91.639	119.807	115.837	72.535	77.078	77.676	62.666	78.542	84.876	61.393	65.058	76.979	54.972
FBgn0033131	CR12842		pseudogene	2.155	0.0002843	0.05279	0.6521	0.05158	0.711	-0.1284	0.4905	2.04	1.522	0.95	1.304	0.209	0.247	0.259	0.294	2.093	0	0.41	1.974	1.293	0.993	1.159	1.769	0.708	0	0.209	0.585
FBgn0031604	Elp3	ELP3	protein_coding	-0.2458	0.0002858	-0.1427	0.1454	-0.05019	0.6685	-0.02702	0.8621	28.29	31.276	28.857	30.094	35.414	34.38	36.527	35.993	36.563	32.088	34.591	30.092	28.065	31.159	35.331	31.841	31.003	31.863	31.589	36.189
FBgn0263198	Acn		protein_coding	-0.2026	0.000291	-0.01194	0.9578	-0.02376	0.7997	-0.09073	0.312	67.294	75.909	72.727	73.913	84.043	85.636	81.378	84.822	73.273	71.405	74.882	72.933	69.888	73.84	66.48	69.01	77.209	68.891	66.446	69.648
FBgn0003162	Pu	GCH1	protein_coding	-1.302	0.000291	-0.05072	0.6719	-0.2155	0.1892	-0.2668	0.1813	1.86	1.375	1.358	1.342	4.484	3.489	4.568	4.412	7.526	8.846	3.484	6.961	5.053	2.094	3.286	4.689	2.437	3.958	3.221	3.888
FBgn0085430	CG34401	ZSWIM8	protein_coding	0.714	0.0002924	0.005684	0.988	0.01096	0.9629	-0.04717	0.8483	29.32	34.663	29.9	34.545	16.236	22.598	16.926	15.49	16.094	18.513	36.552	20.59	19.61	32.386	25.651	15.102	32.387	23.415	21.98	21.056
FBgn0053054	CG33054	OARD1	protein_coding	-0.6004	0.0002931	-0.1574	0.1846	-0.2813	0.06003	-0.2734	0.1111	10.684	12.26	10.769	14.213	18.238	13.99	22.82	23.615	22.338	28.197	26.04	16.583	18.107	19.704	11.729	20.379	18.345	14.119	17.257	22.436
FBgn0035763	CG8602	MFSD1	protein_coding	0.4014	0.0002982	0.09443	0.4877	0.1756	0.1782	0.1497	0.3216	75.404	60.408	81.436	86.576	54.004	50.589	57.901	58.655	45.086	51.889	59.381	63.998	58.872	58.448	70.132	63.067	58.771	66.807	66.763	47.785
FBgn0027592	MED15	MED15	protein_coding	0.4407	0.0002983	0.3541	0.004986	0.479	0.0006375	0.5107	0.0003076	53.051	57.071	59.699	57.744	38.944	37.024	41.754	42.226	41.533	43.678	39.522	65.004	65.825	52.496	76.462	65.144	51.633	71.888	78.204	44.388
FBgn0000667	Actn	ACTN1	protein_coding	-0.2986	0.0003002	-0.1349	0.2169	-0.01386	0.9334	-0.07975	0.5652	32.559	35.82	36.306	37.774	45.194	41.985	44.71	46.771	35.667	37.541	38.619	34.772	31.025	30.777	42.821	37.07	30.569	36.859	33.736	34.322
FBgn0264075	tgo		protein_coding	0.3144	0.0003002	0.03404	0.8692	-0.008248	0.9643	0.0631	0.6863	31.806	33.623	33.734	36.643	24.059	25.38	28.99	28.525	36.209	36.456	29.821	37.665	36.623	32.929	37.514	31.441	32.462	39.226	36.944	32.46
FBgn0030151	CG1354	OLA1	protein_coding	-0.3095	0.000302	-0.05151	0.7466	0.05146	0.7061	-0.09015	0.5125	94.339	106.76	94.468	87.258	113.868	137.252	118.12	115.316	132.14	121.714	150.858	119.914	114.674	144.005	150.289	141.876	139.065	127.346	119.055	129.061
FBgn0039356	CG5039		protein_coding	0.3892	0.0003023	-0.02841	0.9042	-0.107	0.4634	0.03488	0.8752	26.408	24.061	25.084	25.846	19.381	18.736	18.625	17.71	19.379	20.21	27.067	21.05	24.776	19.13	17.653	23.279	17.874	20.362	22.008	26.075
FBgn0264753	Rgk1		protein_coding	-1.893	0.000303	-0.1141	0.3809	-0.07442	0.5866	-0.2824	0.1954	0.182	0.428	0.141	0.071	0.888	2.148	0.334	0.434	0.372	0.654	0.606	0.307	0.28	0.144	0.464	0.315	0.21	0.378	0.204	0.148
FBgn0000239	bur	GMPS	protein_coding	-0.194	0.0003036	-0.03784	0.7571	-0.1121	0.171	-0.04171	0.6951	53.092	54.538	57.244	57.161	59.217	68.001	63.998	64.333	70.206	70.57	68.883	68.297	69.308	64.142	65.873	65.208	60.42	61.764	69.712	70.103
FBgn0037722	CG8319		protein_coding	0.415	0.0003059	0.09515	0.4833	0.1842	0.1736	0.2049	0.185	26.102	18.354	19.284	18.956	15.888	13.432	15.527	14.295	9.288	15.056	14.195	15.265	15.185	15.722	13.862	16.156	18.593	15.416	14.138	17.825
FBgn0030283	CG15198		protein_coding	5.008	0.0003063	0.8216	0.06617	0.9735	0.04569	0.5678	0.08288	2.882	2.854	1.906	3.67	0	0	0	0.113	0	0	0	0.238	0.712	2.391	0.279	0.757	2.386	0	1.811	0
FBgn0037073	Tsr1	TSR1	protein_coding	-0.4496	0.0003063	-0.08972	0.5194	-0.2203	0.0985	-0.2182	0.1476	34.878	36.427	36.273	35.541	48.916	57.579	49.904	49.005	63.689	57.917	40.444	49.253	50.678	38.39	41.315	42.451	40.332	48.483	43.96	38.457
FBgn0035415	CG14966		protein_coding	-0.7073	0.0003075	-0.05905	0.6818	-0.3798	0.0332	-0.5332	0.008682	25.819	14.608	17.051	18.075	28.364	23.107	44.8	38.558	60.051	50.763	30.792	42.095	46.506	28.065	29.964	24.949	29.066	22.674	24.952	30.898
FBgn0036032	CG16711		protein_coding	0.4054	0.0003079	0.1012	0.4436	0.08178	0.5931	0.2477	0.08082	13.023	12.608	9.968	10.831	9.024	9.373	7.71	7.509	6.406	7.398	6.408	7.24	9.11	7.417	8.042	5.853	8.681	9.337	8.755	7.652
FBgn0267703	CR46036		ncRNA	2.7	0.0003107	0.00442	0.987	0.1081	0.486	0.1234	0.5098	2.705	1.549	1.093	0.831	0.202	0.191	0.143	0.13	0.105	0.162	0	0	0	0.206	0	0	0.652	0.235	0.115	0.269
FBgn0033257	sand		protein_coding	-2.372	0.0003179	0.04818	0.6776	-0.03902	0.7833	-0.29	0.191	0	0.127	0.05	0.063	0.281	0.515	0.552	0.465	0.963	0.604	0.649	1.64	1.17	0.786	0.458	0.622	0.523	0.404	0.331	0.216
FBgn0037363	Atg17		protein_coding	0.4245	0.0003182	0.08321	0.564	0.06265	0.7019	0.2731	0.05273	20.128	18.958	23.017	25.24	14.443	18.48	13.865	15.444	14.359	16.255	19.503	19.161	17.6	20.971	18.929	14.429	21.561	23.439	21.807	19.862
FBgn0034368	CG5482		protein_coding	0.3488	0.0003196	0.08574	0.535	0.04006	0.7924	0.1005	0.5047	86.276	70.836	84.416	85.17	59.643	62.058	63.108	64.396	70.74	66.029	68.587	79.272	85.025	66.75	75.596	73.69	67.441	82.411	79.733	63.62
FBgn0005593	RpL7	RPL7,RPL7L1	protein_coding	-0.4371	0.0003239	-0.08535	0.5486	0.07932	0.6077	-0.001152	1	1382.51	1535.19	1232.46	1215.78	2018.96	1820.2	1875.46	1902.69	1461.19	1482.77	2029.54	1214.46	1323.65	1761.6	1863.29	1876.74	1828.26	1636.15	1648.33	1683.8
FBgn0004959	phm		protein_coding	1.796	0.0003267	0.09591	0.4329	0.1417	0.3469	0.7805	0.03447	0.155	0.478	0.99	1.14	0.148	0.238	0.165	0.1	0.162	0.584	0.21	0.491	1.103	0.423	1.399	0.391	0.369	1.692	0.89	0.748
FBgn0030269	CDK2AP1		protein_coding	0.2432	0.0003301	0.16	0.08343	0.1771	0.06789	0.2002	0.03296	59.475	63.235	63.106	63.228	52.058	49.729	53.605	52.983	41.56	44.201	49.218	55.668	49.024	53.772	55.854	50.747	51.835	54.663	53.211	51.629
FBgn0025865	Cortactin		protein_coding	0.4519	0.0003329	0.06919	0.657	0.004578	0.9893	-0.01271	0.9612	87.194	65.475	92.868	94.148	55.1	46.711	65.559	68.708	62.509	58.747	49.903	69.97	63.502	60.867	60.097	54.553	57.641	61.17	55.834	52.12
FBgn0034391	CG15080		protein_coding	-2.925	0.0003355	0.004189	0.9868	0.03196	0.8204	0.08662	0.6452	0.015	0.009	0.045	0.023	0.277	0.279	0.255	0.246	1.052	1.393	0.25	1.615	1.147	0.14	1.471	2.108	0.2	2.112	2.122	0.176
FBgn0052062	Rbfox1		protein_coding	0.4156	0.0003355	-0.05928	0.7174	-0.02334	0.901	-0.07403	0.6925	56.182	47.977	35.021	41.162	38.882	34.993	27.558	28.006	27.316	25.736	27.928	25.141	21.979	26.106	24.89	25.014	28.245	27.917	25.179	22.42
FBgn0262954	Rpb12	POLR2K	protein_coding	-0.4836	0.0003361	-0.1179	0.348	-0.3207	0.02143	-0.1161	0.5248	94.309	90.772	81.972	91.417	142.332	119.825	138.681	129.486	185.546	152.412	178.776	143.937	139.595	132.303	108.385	122.373	125.331	130.456	118.922	200.677
FBgn0030467	CG1764		protein_coding	0.4365	0.0003374	0.03067	0.8945	0.09533	0.5326	0.2369	0.1145	16.933	20.847	20.209	17.001	12.9	11.63	14.706	13.77	15.99	15.397	16.299	13.795	16.571	19.82	15.382	19.912	19.129	22.432	18.955	19.453
FBgn0284231	CG46315		protein_coding	-0.5977	0.0003385	-0.007935	0.9821	0.03261	0.866	0.2966	0.08106	9.113	13.586	9.308	9.507	21.709	18.297	13.467	14.491	9.729	7.418	9.967	6.804	8.387	11.228	11.134	7.344	10.57	11.59	10.163	16.324
FBgn0011741	Arp6	ACTR6	protein_coding	0.2592	0.0003397	0.07491	0.5671	0.1089	0.3297	0.1385	0.214	60.113	54.872	53.006	48.1	44.415	42.504	47.366	43.715	46.15	42.673	41.133	42.192	48.176	49.787	44.827	51.622	47.266	44.464	50	49.145
FBgn0038129	TBC1D5		protein_coding	0.555	0.0003422	0.07764	0.5791	0.1724	0.2227	0.1422	0.4449	21.304	37.554	20.328	21.993	17.018	15.702	15.237	16.274	15.053	11.347	15.75	14.125	16.019	20.517	18.774	18.476	18.417	17.8	13.315	18.942
FBgn0262512	Vha14-1	ATP6V1F	protein_coding	0.3604	0.0003432	-0.03798	0.8543	-0.03145	0.8478	0.005646	0.986	102.586	81.418	97.818	89.553	64.378	63.576	82.451	69.807	93.426	79.129	88.672	69.602	85.483	89.737	88.875	85.159	76.998	95.328	83.944	84.884
FBgn0036372	Abp1		protein_coding	0.4588	0.0003432	0.06785	0.6668	-0.02999	0.8744	0.1221	0.4884	37.565	29.846	30.106	29.734	19.574	22.036	23.676	22.508	29.629	27.774	20.868	29.405	35.442	24.059	23.863	27.223	23.221	31.943	30.131	26.894
FBgn0028494	CG6424		protein_coding	-0.5976	0.0003459	-0.008395	0.981	0.0319	0.8701	0.2951	0.08289	8.427	12.568	8.594	8.778	20.069	16.898	12.46	13.397	9.002	6.864	9.202	6.282	7.744	10.367	10.28	6.78	9.759	10.701	9.383	15.081
FBgn0030968	CG7322	DCXR	protein_coding	-1.425	0.0003507	0.1409	0.2817	0.03761	0.8014	0.06861	0.7467	0.749	0.441	0.396	0.452	2.434	1.112	1.424	1.325	1.429	1.471	1.807	3.089	4.257	1.803	0.87	2.461	2.304	0.639	0.942	3.566
FBgn0040228	DCTN5-p25	DCTN5	protein_coding	0.4763	0.0003516	0.1448	0.2238	0.1847	0.1828	0.01505	0.954	33.941	27.27	33.394	29.585	21.195	18.454	22.668	22.031	29.201	22.803	25.815	31.311	33.434	35.767	30.801	28.323	40.167	22.243	22.752	31.873
FBgn0052982	CG32982		protein_coding	1.264	0.0003527	0.03196	0.8172	0.08414	0.5444	1.328	0.002485	2.871	1.457	1.766	1.687	0.592	0.813	0.466	0.888	0.914	0.681	0.69	0.931	0.793	1.193	0.398	1.248	1.64	2.043	1.111	3.934
FBgn0030930	GalNAc-T2		protein_coding	0.2451	0.0003543	-0.001557	1	0.1321	0.1994	-0.05934	0.6568	19.591	22.817	21.532	24.237	17.782	18.018	18.53	19.405	21.103	20.334	19.263	20.757	19.615	20.084	24.223	23.889	20.579	18.869	20.786	18.181
FBgn0002733	E(spl)mbeta-HLH		protein_coding	1.341	0.0003553	0.05474	0.6393	0.1951	0.2184	1.02	0.008233	301.747	599.48	176.104	183.34	67.628	259.371	44.554	51.892	120.792	118.675	87.314	187.283	186.757	110.445	243.437	249.915	130.5	395.749	350.344	185.452
FBgn0052436	CG32436		protein_coding	1.322	0.0003593	0.0813	0.4737	-0.07323	0.6031	0.08613	0.6738	3.496	1.808	4.353	2.705	0.847	0.514	1.407	1.45	3.304	2.466	1.301	5.37	4.535	1.768	1.375	1.07	2.418	1.28	3.193	4.393
FBgn0038260	CG14855		protein_coding	-1.105	0.0003714	-0.2012	0.1779	-0.9354	0.01265	-2.11	1.154e-05	0.906	1.576	1.18	1.527	4.112	2.443	3.445	2.984	2.354	4.988	2.004	1.644	2.228	1.024	1.838	0.686	1.123	0.944	0.795	0.371
FBgn0036988	CG5262	TMEM104	protein_coding	0.4334	0.0003745	0.1577	0.1776	0.151	0.2817	0.1276	0.465	13.318	12.801	16.549	16.954	11.456	11.307	9.254	10.083	9.665	10.54	11.568	15.953	12.062	13.455	13.29	12.047	13.806	15.058	12.094	10.363
FBgn0038921	CG6332		protein_coding	2.956	0.0003776	0.1643	0.3516	0.1496	0.3874	0.8677	0.04973	0.453	0.457	0.339	0.286	0.05	0.047	0	0.028	0	0.07	0	0	0.176	0.236	0.413	0	0.056	0.202	0.298	0.325
FBgn0012051	CalpA	CAPN9	protein_coding	0.3409	0.0003777	0.05198	0.7571	0.08434	0.5392	0.2672	0.02495	37.25	34.722	38.486	39.786	27.642	33.358	27.533	26.81	35.276	33.258	32.765	37.173	37.359	34.562	38.585	39.533	34.01	42.018	43.605	41.541
FBgn0037950	HisCl1		protein_coding	-3.308	0.0003798	-0.005526	0.981	-0.01136	0.9473	0.01515	0.9473	0	0.08	0	0	0.367	0.429	0.281	0.413	0.318	0.344	0.302	0.495	0.124	0.291	0	0.526	0.276	0.853	0.21	0.196
FBgn0036557	mRpS31	MRPS31	protein_coding	-0.2907	0.000384	-0.02616	0.9048	-0.0002379	1	-0.1124	0.3823	52.673	47.003	50.673	52.458	67.803	58.673	63.396	62.509	59.777	55.527	61.884	54.059	56.704	60.123	55.094	62.354	59.458	58.158	51.512	52.843
FBgn0019972	Drice	CASP3,CASP7	protein_coding	0.4678	0.0003844	0.1108	0.3842	0.03663	0.8356	0.1363	0.4298	91.285	63.988	100.639	100.282	52.774	42.618	73.652	74.751	68.597	77.937	68.456	93.929	87.04	82.024	74.243	79.577	74.396	73.765	83.475	90.192
FBgn0040078	pont	RUVBL1	protein_coding	-0.3028	0.0003845	-0.179	0.07329	-0.2781	0.006058	-0.4159	4.413e-05	71.8	75.897	76.398	67.399	81.076	81.2	107.181	97.852	113.488	109.597	93.66	89.832	94.477	76.96	81.755	88.278	76.842	75.573	77.568	74.393
FBgn0024989	CG3777		protein_coding	2.377	0.000386	0.02966	0.8218	0.1054	0.4605	0.2096	0.2963	0.473	0.395	0.253	0.233	0.045	0.064	0.028	0.051	0.773	0.618	0.155	1.109	1.099	0.126	1.638	1.34	0.291	1.48	1.697	0.368
FBgn0261285	Ppcs		protein_coding	-0.3729	0.0003869	0.02837	0.904	-0.1109	0.4237	-0.3434	0.007643	8.341	10.747	10.571	12.423	13.657	15.045	13.672	14.173	13.827	17.13	13.092	18.604	14.858	12.876	10.966	14.439	12.828	11.333	9.997	11.242
FBgn0267991	CR46258		ncRNA	0.993	0.000388	0.7766	0.02899	0.3635	0.09828	0.08739	0.6636	1.079	0.995	1.037	1.314	0.487	0.357	0.602	0.507	0.394	0.557	0.226	1.447	1.147	0.557	1.299	0.746	0.61	0.293	0.793	0.37
FBgn0016687	Nurf-38	PPA1,PPA2	protein_coding	-0.3536	0.00039	-0.2729	0.007065	-0.3616	0.001175	-0.4621	7.225e-05	167.701	166.72	166.878	154.052	201.717	175.118	249.879	236.744	256.186	240.882	229.319	165.074	185.968	188.947	169.94	170.603	180.285	158.169	154.796	184.235
FBgn0001226	Hsp27		protein_coding	0.9198	0.0003907	0.08296	0.4755	0.0391	0.8164	0.1309	0.5125	132.463	57.027	95.605	87.749	35.516	14.464	63.166	60.39	45.095	43.674	42.319	60.848	76.336	50.425	41.665	49.846	58.155	41.103	44.554	81.798
FBgn0264816	koko	CCNQ	protein_coding	-0.3759	0.0003907	-0.1036	0.4288	-0.1535	0.2507	-0.1774	0.2298	11.04	12.863	11.383	13.096	15.929	15.96	16.879	16.443	18.379	18.212	16.103	16.652	13.613	14.677	13.545	14.05	15.615	12.006	11.797	18.506
FBgn0034046	tun		protein_coding	0.3012	0.0003986	0.09364	0.4716	0.2499	0.02175	0.08391	0.5772	13.294	12.463	9.514	10.194	8.825	9.57	8.549	9.097	8.589	7.53	8.318	9.603	8.591	9.316	9.402	10.292	10.928	8.354	8.311	9.369
FBgn0051477	ATPsynepsilonL		protein_coding	1.542	0.0003986	0.05531	0.6309	-0.03564	0.8032	-0.1095	0.5629	18.766	7.88	9.404	7.047	1.869	1.892	4.624	3.906	7.777	5.818	2.096	8.825	11.331	4.758	5.551	5.023	1.809	4.889	4.27	1.745
FBgn0031337	CG14346		protein_coding	3.721	0.0003991	0.07682	0.5687	-0.04879	0.7453	-0.07089	0.7045	0.357	0.21	0.156	0.395	0	0	0	0.039	0.25	0	0	0.162	0.486	0	0	0	0	0	0	0
FBgn0037899	RpL24-like		protein_coding	-0.5978	0.0004005	-0.1352	0.2522	-0.05772	0.7418	-0.08027	0.7113	169.957	205.249	136.402	143.514	307.215	278.394	247.041	241.859	232.32	209.16	293.28	147.644	158.771	232.423	183.672	231.493	238.395	219.014	221.289	222.863
FBgn0040784	karr		protein_coding	3.74	0.0004036	-0.02892	0.8493	-0.2112	0.2867	-0.5547	0.09134	8.222	3.659	1.595	1.751	0	0.199	0.347	0.079	1.789	0.592	0.22	0	1.241	0	0	0	0.158	0	0	0
FBgn0039075	CG4393		protein_coding	-1.435	0.0004111	-0.09286	0.4245	-0.08646	0.5329	-0.7325	0.02578	0.883	1.403	0.416	0.465	2.121	6.016	1.045	1.018	4.273	4.783	6.71	3.609	2.342	2.89	4.715	2.917	2.589	2.147	2.475	1.307
FBgn0000152	Axs		protein_coding	0.3898	0.0004115	0.08011	0.5838	0.05604	0.7298	0.4201	0.00143	29.428	26.153	26.554	27.332	20.719	21.034	17.88	20.652	20.858	22.608	18.147	25.31	22.236	22.453	23.167	20.408	22.947	29.255	28.796	30.309
FBgn0034433	EndoB		protein_coding	0.422	0.0004119	0.08273	0.5664	0.0472	0.7847	-0.03703	0.8713	12.223	10.706	11.944	12.216	8.975	8.922	7.922	7.691	9.21	8.701	10.075	14.675	7.328	10.9	10.144	9.872	10.208	9.088	8.984	8.968
FBgn0250848	26-29-p		protein_coding	0.3848	0.0004129	0.2429	0.024	0.4014	0.001	0.6181	1.713e-06	80.368	70.261	66.62	63.654	52.927	48.442	51.524	54.181	68.004	63.327	50.91	88.108	83.604	72.645	95.312	88.621	80.567	107.5	102.833	87.264
FBgn0260746	Ect3	GLB1L3,GLB1,GLB1L,GLB1L2	protein_coding	2.746	0.0004129	0.01116	0.9563	-0.1674	0.3268	-0.5309	0.09346	3.313	0.919	4.653	4.521	0.234	0.263	0.507	0.362	13.528	15.876	0.689	21.48	14.899	0.799	2.271	6.495	0.694	2.143	3.802	0.628
FBgn0038424	CG17565	CHURC1-FNTB,FNTB	protein_coding	-0.3682	0.000413	-0.01091	0.975	0.07316	0.6218	0.1645	0.2531	26.265	23.267	23.274	23.808	31.084	29.204	34.863	33.706	32.409	26.787	28.407	24.903	30.596	29.964	34.902	33.023	28.809	38.173	31.173	33.2
FBgn0032515	loqs		protein_coding	0.3996	0.0004154	0.2507	0.02874	0.225	0.08887	0.1764	0.2622	10.968	10.795	9.715	10.089	7.356	8.217	7.191	7.425	6.656	6.185	9.283	10.79	9.547	10.859	8.314	9.351	11.256	9.415	9.994	7.867
FBgn0031143	CG1532	GLOD4	protein_coding	-0.5739	0.0004183	-0.05814	0.7111	-0.2068	0.1474	-0.07965	0.7125	34.168	35.255	34.756	34.845	52.215	42.246	62.913	66.161	47.307	39.064	49.687	36.235	37.996	42.627	22.739	33.058	41.531	32.951	27.827	60.722
FBgn0265996	CR44771		ncRNA	3.571	0.0004239	0.2272	0.2711	0.2101	0.2884	0.0469	0.8107	3.026	2.997	1.121	0.913	0.159	0.15	0.065	0	0	0	0.166	0.998	0.934	0.377	0.293	0.596	0.835	0	0.423	0
FBgn0033033	scaf		protein_coding	0.739	0.0004249	0.03746	0.83	0.05575	0.7447	0.1068	0.6107	30.177	17.135	24.33	21.508	11.622	10.138	13.708	14.766	17.543	15.992	11.747	18.959	16.405	16.678	18.96	16.246	17.131	13.148	16.206	23.725
FBgn0263831	Gen		protein_coding	-0.3581	0.0004289	0.03995	0.8456	-0.06162	0.6948	-0.05257	0.7859	9.552	8.714	10.703	9.778	12.016	12.234	13.385	13.698	13.779	14	11.002	14.336	13.689	13.06	11.089	12.886	11.373	14.639	11.91	11.015
FBgn0266019	rudhira		protein_coding	0.654	0.0004295	0.01205	0.9671	0.114	0.4448	0.08942	0.6778	89.938	84.556	64.199	77.02	56.85	62.23	32.135	31.905	26.563	28.773	53.227	34.371	31.192	47.289	46.534	38.993	52.014	44.564	40.404	38.059
FBgn0032487	Ski6	EXOSC4	protein_coding	-0.5301	0.0004295	-0.2023	0.09471	-0.3527	0.02174	-0.4163	0.01262	18.593	20.723	16.735	14.671	28.805	24.15	30.22	26.287	30.744	32.752	22.793	19.541	23.017	17.524	17.948	18.837	19.068	17.927	17.882	19.816
FBgn0023477	Taldo	TALDO1	protein_coding	-0.5442	0.0004296	-0.1211	0.3226	-0.2762	0.05482	-0.3657	0.02495	173.721	155.377	191.711	181.427	269.186	162.68	351.725	316.482	296.544	267.005	249.889	207.854	229.17	190.861	183.763	193.868	184.185	164.581	155.386	233.329
FBgn0038429	CG14882		protein_coding	-0.429	0.0004296	-0.003286	0.9983	-0.0178	0.9341	-0.01964	0.9389	7.136	8.863	8.362	8.34	12.346	10.992	11.648	11.393	10.795	13.056	10.686	11.71	12.53	10.19	9.821	9.683	13.433	10.472	9.469	13.161
FBgn0004463	RpIII128	POLR3B	protein_coding	-0.2611	0.0004309	-0.0888	0.4672	0.0352	0.7826	-0.02376	0.8869	21.72	26.109	22.263	24.939	27.7	30.67	29.485	27.748	26.063	25.648	24.497	24.661	22.041	22.419	27.261	25.506	26.662	21.705	26.77	25.382
FBgn0262987	CG43295		protein_coding	-0.9134	0.0004335	-0.0977	0.3969	-0.3406	0.07516	-0.6849	0.01184	7.94	5.174	5.407	4.734	16.16	8.889	12.523	11.756	13.232	17.7	13.652	10.725	12.853	6.476	7.195	7.326	9.086	1.584	4.411	11.874
FBgn0052707	APC4		protein_coding	-0.3197	0.0004351	-0.0002482	1	0.1191	0.3499	0.1033	0.4844	13.73	14.773	13.783	13.818	17.574	18.5	17.949	17.747	15.426	14.725	16.541	13.573	17.062	15.946	20.925	15.425	17.47	13.935	17.74	18.551
FBgn0261456	hpo	STK3	protein_coding	0.3826	0.0004369	0.0624	0.7021	-0.03506	0.8322	-0.05665	0.7683	51.651	46.657	58.49	60.275	36.187	34.842	44.989	44.428	48.714	48.936	40.837	55.793	53.794	43.344	46.237	42.662	42.804	44.713	49.811	36.937
FBgn0004635	rho		protein_coding	-0.8648	0.0004369	-0.09853	0.3945	-0.04982	0.7661	-0.08457	0.7011	5.988	7.321	3.485	5.085	11.449	16.684	7.957	8.943	8.455	7.879	6.282	4.993	5.128	5.181	6.83	7.015	5.416	3.549	5.798	9.466
FBgn0265540	CR44390		ncRNA	0.7638	0.0004386	0.06271	0.6205	0.9564	0.002964	0.02705	0.9184	3.101	3.498	2.814	3.275	2.221	1.717	1.224	1.522	0.698	0.908	1.506	1.335	1.285	1.631	3.246	2.165	2.006	0.904	0.888	1.451
FBgn0039902	Zip102B	SLC39A9	protein_coding	-0.4043	0.0004403	0.09623	0.4766	0.07891	0.6054	0.1	0.56	28.502	34.989	27.46	30.092	41.92	51.806	37.308	36.113	40.1	40.667	38.9	52.054	45.715	41.867	40.923	49.123	43.19	44.686	47.989	39.421
FBgn0035917	Zasp66		protein_coding	-3.262	0.0004428	-0.007509	0.974	0.01198	0.9449	-0.0382	0.8494	0.182	0.285	0.176	0.134	6.863	3.472	0.892	1.099	2.033	2.355	1.333	2.307	2.509	0.028	2.515	4.245	0.105	1.704	2.465	0
FBgn0259932	CG42455		protein_coding	-0.2742	0.000445	-0.2075	0.0224	-0.2142	0.03543	-0.2576	0.01041	65.376	56.025	67.452	58.753	73.3	69.653	83.577	77.629	89.362	88.106	78.448	66.939	73.969	66.564	75.433	73.14	63.793	70.028	63.005	73.988
FBgn0051357	CG31357	MAEA	protein_coding	0.4198	0.0004483	0.081	0.5777	0.2729	0.03558	0.3316	0.01839	40.318	44.924	45.834	48.777	33.664	34.775	29.146	30.848	25.362	33.373	39.252	39.781	32.204	41.42	46.491	40.706	46.486	50.99	48.234	36.219
FBgn0034925	CG5339	METTL9	protein_coding	0.3197	0.000452	-0.04968	0.7737	0.1223	0.3381	0.1689	0.1959	35.322	30.071	35.552	34.051	25.213	25.86	28.899	25.545	29.027	29.765	32.948	25.677	27.728	31.736	37.612	32.382	35.708	37.383	34.515	35.438
FBgn0029969	CG10932	ACAT1	protein_coding	0.4919	0.0004528	0.09373	0.4854	0.2039	0.1423	0.1107	0.5559	54.912	54.838	78.421	67.862	39.505	44.2	46.273	41.292	50.626	51.038	53.768	57.914	64.054	65.884	67.34	63.987	74.038	67.673	59.15	49.858
FBgn0085468	ND-MWFE		protein_coding	0.2974	0.000454	-0.1931	0.05125	-0.3772	0.0001991	-0.2348	0.03837	67.288	64.582	66.691	67.469	51.662	50.043	56.517	54.026	70.408	75.405	68.141	56.725	63.73	53.034	44.042	59.202	49.881	63.078	58.726	55.569
FBgn0033504	CAP		protein_coding	0.9628	0.0004567	0.01439	0.9539	0.08444	0.5635	0.1238	0.5372	6.423	7.237	4.356	4.663	2.738	4.497	1.509	1.403	2.99	3.217	2.912	4.177	3.366	2.352	4.834	4.911	2.452	4.175	4.849	2.721
FBgn0031403	CG15387	C12orf57	protein_coding	0.4065	0.0004597	0.04563	0.8146	0.07435	0.6381	0.04195	0.8483	63.52	44.139	56.126	62.692	45.549	30.808	40.75	46.202	36.431	40.079	39.716	42.342	45.735	38.911	40.033	44.398	44.87	40.716	39.252	41.505
FBgn0039282	Bili		protein_coding	-1.519	0.0004597	-0.1069	0.3832	-0.1555	0.3031	-0.1488	0.4291	0.925	1.564	1.019	1.262	6.696	2.184	3.309	4.371	2.504	1.424	2.503	0.821	1.096	1.329	1.508	0.91	0.87	0.308	0.483	2.977
FBgn0037529	mRpS9	MRPS9	protein_coding	-0.2777	0.0004608	-0.13	0.2342	-0.2818	0.003572	-0.4262	1.113e-05	62.821	58.211	70.586	65.453	71.315	68.389	90.366	87.096	83.904	84.5	73.628	72.501	69.869	67.612	61.564	65.675	61.578	54.762	60.483	57.243
FBgn0032512	Bdp1		protein_coding	-0.3164	0.000461	-0.04435	0.8107	-0.07782	0.5635	-0.1478	0.2613	21.395	26.266	23.215	24.051	31.194	30.556	28.968	30.512	28.759	29.718	27.901	24.886	29.656	26.498	25.287	24.436	28.671	21.956	26.689	26.406
FBgn0013718	nuf		protein_coding	0.8408	0.0004681	0.004478	0.9919	-0.1416	0.3198	-0.1392	0.4832	19.635	10.613	20.523	18.776	7.257	6.965	9.728	10.421	13.71	13.35	6.086	13.169	13.255	7.404	6.515	8.558	7.698	8.994	8.907	7.991
FBgn0033661	CG13185	MDN1	protein_coding	-0.8129	0.0004716	-0.06276	0.6309	-0.185	0.2052	-0.2029	0.28	8.139	8.92	7.452	7.118	14.69	20.625	13.449	13.776	18.941	20.296	9.234	14.7	13.611	9.258	14.73	7.983	9.109	11.235	12.995	10.648
FBgn0058160	CG40160		protein_coding	0.6939	0.0004726	-0.0338	0.8545	0.02115	0.9191	-0.1391	0.4823	3.841	3.316	4.05	4.575	1.337	2.198	2.449	2.852	2.847	3.44	2.841	2.561	2.988	2.517	3.74	3.844	2.164	2.104	3.58	1.719
FBgn0026088	CG14818		protein_coding	0.4314	0.0004759	0.008601	0.9818	0.01481	0.9468	0.1225	0.4873	70.862	61.71	59.298	67.238	52.178	39.219	44.439	46.834	41.873	44.946	50.355	46.331	43.844	49.759	36.85	49.426	53.25	47.657	58.006	50.332
FBgn0004432	Cyp1		protein_coding	0.4151	0.0004759	0.1547	0.1833	0.3567	0.005449	0.2939	0.03443	465.481	471.981	375.832	352.594	308.655	277.243	319.973	287.971	310.577	324.401	348.855	360.354	389.161	490.004	447.33	444.135	519.063	366.42	387.962	536.574
FBgn0034491	Hsl		protein_coding	0.3898	0.0004762	0.004061	0.9947	0.1067	0.4529	0.1469	0.3391	29.892	33.399	30.853	33.062	22.101	29.26	20.508	21.435	19.358	18.986	23.268	19.009	18.233	24.739	24.908	21.156	24.818	26.336	22.277	22.772
FBgn0000246	c(3)G		protein_coding	0.5233	0.0004766	0.05314	0.7417	0.277	0.05708	0.4052	0.01581	8.809	8.125	7.821	8.502	5.649	6.1	4.571	5.236	5.028	5.492	4.395	6.286	5.94	4.907	7.863	7.958	6.096	9.214	7.661	6.318
FBgn0267035	CR45479		ncRNA	0.7573	0.0004809	0.06124	0.6443	0.1199	0.4109	0.03478	0.8933	7.74	12.599	13.179	14.057	5.424	7.035	5.534	7.249	4.361	5.535	7.456	6.565	6.816	8.765	9.921	6.941	7.025	6.274	7.155	5.243
FBgn0038609	Nup43		protein_coding	-0.414	0.0004836	-0.1368	0.2526	-0.05834	0.725	-0.282	0.04955	33.537	37.598	36.537	32.454	46.972	43.628	53.22	51.785	38.647	41.162	59.321	30.352	37.539	44.148	42.973	43.293	42.266	33.411	34.881	38.123
FBgn0026239	gukh		protein_coding	0.6462	0.0004845	-0.1523	0.2021	-0.1162	0.4342	-0.1757	0.3425	15.682	25.056	23.69	27.889	13.659	13.464	13.048	13.643	10.472	12.232	16.554	8.224	7.046	11.86	11.635	8.296	10.936	8.609	8.867	13.365
FBgn0263251	vnc	NAA10	protein_coding	-0.2733	0.0004846	-0.2073	0.02284	-0.2148	0.03532	-0.2541	0.01179	60.997	52.256	63.125	54.946	68.416	65.035	78.078	72.463	83.466	82.12	73.117	62.505	68.943	62.041	70.307	68.17	59.459	66.056	58.724	68.961
FBgn0040071	tara		protein_coding	-0.7525	0.0004847	-0.002843	0.9983	-0.01464	0.9473	0.02404	0.9296	6.84	14.45	6.777	7.733	17.059	21.084	14.108	15.13	11.823	10.835	15.442	12.788	10.483	14.421	12.064	8.821	15.669	11.678	10.775	17.081
FBgn0004861	ph-p		protein_coding	-0.6142	0.0004883	-0.03205	0.8768	-0.08556	0.594	0.1236	0.5303	2.139	2.563	2.496	2.188	4.227	4.024	3.654	3.783	5.879	7.198	3.549	5.09	5.442	4.547	5.661	4.378	3.925	7.305	6.703	5.577
FBgn0265823	CR44612		ncRNA	2.339	0.0004891	0.01101	0.9613	0.09858	0.527	0.3073	0.2058	0.805	0.508	0.402	0.573	0.066	0.115	0.068	0.075	0	0	0.035	0	0	0.053	0	0.125	0.05	0.09	0.044	0.144
FBgn0035397	CG11486	PAN3	protein_coding	0.4903	0.0004892	0.008902	0.9805	0.04998	0.7789	-0.1562	0.3633	90.764	85.655	59.252	68.199	58.269	59.408	42.959	42.58	54.446	56.13	54.239	56.041	52.633	59.405	57.384	57.566	64.431	56.101	54.708	28.657
FBgn0266711	EloC	ELOC	protein_coding	0.3919	0.000493	0.01773	0.956	0.107	0.4564	0.2155	0.1355	121.987	133.489	85.081	92.829	85.027	75.731	80.793	75.462	66.645	74.531	69.486	74.857	69.687	73.075	77.909	91.456	73.634	91.987	76.587	90.482
FBgn0261985	Ptpmeg		protein_coding	0.4223	0.000496	0.2706	0.0198	0.29	0.026	0.9357	1.312e-09	37.709	42.918	33.956	35.895	29.192	37.822	19.633	20.4	19.852	20.692	19.583	29.399	29.435	25.792	27.497	27.955	27.342	41.626	41.323	35.769
FBgn0260799	p120ctn		protein_coding	-0.4502	0.0005022	0.00151	1	-0.05012	0.7742	-0.1751	0.2759	50.801	46.895	67.78	72.252	79.345	88.986	87.185	87.271	119.22	119.405	110.29	129.762	111.796	108.503	106.635	115.507	100.322	106.774	107.447	78.126
FBgn0031694	Cyp4ac2		protein_coding	2.222	0.000508	-0.00343	0.9919	0.02632	0.8567	0.09106	0.6261	1.993	1.643	1.305	1.139	0.172	0.217	0.402	0.172	0.418	0.323	0.18	0.271	0.135	0.409	0.743	0.072	0.432	1.246	0.459	0.071
FBgn0038277	RpS5b	RPS5	protein_coding	-1.115	0.000508	-0.05066	0.6805	-0.0341	0.8313	-0.1553	0.4176	13.788	20.195	19.642	13.732	21.841	14.88	68.239	65.749	173.183	147.092	65.604	109.129	113.484	59.405	138.426	134.199	59.258	95.448	75.771	98.634
FBgn0259735	CG42389		protein_coding	-0.3243	0.0005109	-0.07242	0.6267	-0.2206	0.0548	-0.2635	0.02422	14.627	13.586	13.034	12.932	16.442	16.493	18.104	18.527	16.297	15.546	12.962	14.08	13.523	13.003	12.605	10.145	13.327	12.539	11.712	11.61
FBgn0005696	DNApol-alpha73	POLA2	protein_coding	-0.4681	0.0005112	-0.02224	0.9341	-0.03499	0.8478	-0.1675	0.3173	21.059	19.271	25.733	21.059	29.639	29.357	35.112	33.685	29.051	32.14	35.094	26.088	33.034	32.686	32.035	28.891	30.101	23.063	22.408	34.288
FBgn0037881	GCC88	GCC1	protein_coding	0.2507	0.0005165	-0.02769	0.8945	-0.07322	0.5492	0.1022	0.4109	21.121	22.502	22.662	22.577	17.722	19.001	19.462	17.704	16.617	21.23	15.657	17.692	17.286	16.532	16.399	16.166	16.477	20.75	19.205	18.594
FBgn0039306	RIOK2	RIOK2	protein_coding	-0.3821	0.0005174	-0.1119	0.3809	-0.01782	0.9289	-0.08291	0.6428	29.613	35.711	28.92	30.513	43.657	49.142	37.501	38.694	35.774	35.296	45.572	28.312	29.728	40.208	35.002	40.274	38.554	36.789	37.344	34.248
FBgn0086613	Ino80	INO80	protein_coding	-0.2502	0.0005178	-0.03578	0.8394	-0.06242	0.5904	-0.0519	0.7106	15.265	16.622	17.776	16.597	17.993	20.408	20.789	20.763	18.693	20.699	17.766	18.469	19.018	17.267	18.018	17.394	17.905	19.648	17.909	17.565
FBgn0033089	CG17266	PPIH	protein_coding	-0.4877	0.0005181	-0.1494	0.2063	-0.3204	0.02577	-0.4555	0.004572	28.225	19.771	22.537	23.163	33.611	28.039	40.458	37.289	36.461	48.922	40.491	29.935	35.161	30.382	25.561	30.632	29.283	25.505	23.333	31.61
FBgn0052767	CG32767		protein_coding	0.4507	0.0005188	0.0313	0.8902	0.01766	0.9347	0.03519	0.8791	27.452	19.167	15.434	17.652	15.869	15.138	12.088	12.103	12.642	14.126	12.734	14.642	12.945	14.468	13.903	11.668	15.072	17.824	12.534	10.908
FBgn0030731	Mfe2	HSD17B4	protein_coding	0.4485	0.0005196	0.03018	0.8967	-0.0009403	1	0.0585	0.7838	35.458	33.696	34.675	31.613	19.884	22.865	25.917	25.414	24.849	21.061	27.309	23.486	27.921	26.453	24.77	21.056	27.265	23.301	24.745	29.481
FBgn0005596	yem		protein_coding	-0.4201	0.0005201	0.03526	0.8735	-0.1056	0.474	0.03657	0.8708	11.65	13.876	13.676	12.722	16.807	15.838	19.871	20.428	14.946	16.684	15.99	16.577	16.809	17.452	14.415	9.929	16.675	16.39	15.703	17.302
FBgn0086346	ALiX		protein_coding	0.4428	0.0005258	0.0383	0.8545	0.1126	0.4421	0.2179	0.154	121.886	132.748	117.326	119.334	81.142	106.858	75.978	78.95	74.368	67.768	93.359	71.985	74.596	106.971	92.042	76.217	108.057	93.517	105.77	93.714
FBgn0035245	GC	GGCX	protein_coding	-2.045	0.0005287	-0.08331	0.501	0.02845	0.8413	-0.332	0.1714	0.063	0.093	0.111	0.187	0.999	0.518	0.512	0.466	0.266	0.206	0.574	0.288	0.086	0.116	0.27	0.825	0.303	0	0.146	0.136
FBgn0052745	CR32745		pseudogene	-1.049	0.0005293	-0.01218	0.9592	0.00114	1	-0.1904	0.3158	4.158	7.24	5.26	6.931	17.779	10.299	12.971	16.018	11.883	9.373	13.519	16.067	7.368	9.239	5.775	18.552	10.35	10.173	8.33	5.316
FBgn0032130	CG3838		protein_coding	0.3412	0.0005293	-0.009471	0.9792	0.174	0.1576	0.04491	0.8106	72.422	85.674	70.767	75.597	60.11	67.165	52.703	53.407	41.33	55.289	61.649	53.19	47.97	55.196	71.677	62.874	56.133	56.448	58.465	50.597
FBgn0020762	Atet		protein_coding	0.7529	0.0005426	0.01441	0.9577	-0.1725	0.2299	-0.5914	0.01052	5.39	8.233	7.682	9.674	4.179	5.144	3.68	3.432	4.178	3.911	3.319	4.241	4.698	3.186	2.628	1.479	3.479	1.675	1.895	2.271
FBgn0004872	piwi	PIWIL3,PIWIL1,PIWIL4	protein_coding	-0.7461	0.0005438	-0.02259	0.9176	-0.05076	0.7709	-2.929	1.106e-26	184.668	230.375	339.356	370.708	488.473	530.228	543.006	547.834	598.303	651.979	519.438	609.105	586.009	423.973	582.332	561.725	398.572	95.978	97.796	29.988
FBgn0039274	CG11920	IMP4	protein_coding	-0.436	0.000547	-0.1128	0.3759	-0.03704	0.8331	-0.1142	0.523	32.728	35.131	27.271	28.041	44.799	59.596	34.981	35.748	38.48	41.895	51.856	36.168	36.119	36.551	39.24	47.185	38.827	42.349	37.734	38.439
FBgn0035978	UGP	UGP2	protein_coding	-0.3378	0.0005501	-0.0168	0.9569	-0.1749	0.1568	-0.3178	0.008601	10.569	9.187	12.778	13.273	14.233	12.962	16.677	15.793	22.924	19.169	18.338	19.939	20.962	17.899	16.73	17.523	15.909	14.312	15.322	15.89
FBgn0016122	Acer	AC113554.1	protein_coding	-0.6664	0.0005516	-0.07689	0.5538	-0.1796	0.2114	-0.2596	0.1485	4.073	3.622	3.734	3.396	5.799	5.381	7.173	7.584	10.24	9.835	5.668	6.471	7.451	6.196	7.087	5.157	5.843	5.327	4.948	7.543
FBgn0264346	CR43802		ncRNA	4.461	0.0005548	0.06188	0.6685	0	1	1.153	0.02655	5.469	2.709	2.676	1.1	0	0.18	0	0	0	0	0	0	0	0.34	0	0	0	1.554	1.718	0.267
FBgn0052115	CG32115		protein_coding	2.673	0.0005553	-0.009956	0.9629	0.01832	0.906	0.08021	0.6683	0.546	0.354	0.349	0.644	0.063	0.079	0.026	0.024	0.305	0.177	0	0.099	0.074	0.149	0.116	0.158	0.237	0.341	0.251	0.196
FBgn0011828	Pxn		protein_coding	0.9889	0.0005625	0.07284	0.5311	0.5013	0.04034	1.055	0.002365	11.624	10.029	10.475	9.13	4.29	4.789	4.396	4.493	4.54	3.784	4.122	5.861	4.992	7.19	10.353	8.928	6.71	12.561	13.726	5.415
FBgn0036892	Lon	LONP1	protein_coding	-0.3231	0.0005701	0.03434	0.871	-0.03269	0.8281	0.08012	0.6058	39.776	40.252	47.427	45.488	51.87	63.24	51.915	55.042	60.003	54.506	49.096	63.031	57.052	51.696	55.83	50.524	50.392	58.957	58.66	57.707
FBgn0037057	CG10512		protein_coding	-0.8927	0.0005706	-0.03603	0.8178	-0.002506	0.9972	-0.3825	0.06232	22.975	23.313	36.778	34.276	64.478	64.905	63.188	56.68	65.463	76.103	83.63	65.026	70.979	52.098	88.088	87.65	47.697	54.039	57.031	17.448
FBgn0029157	ssh		protein_coding	0.3245	0.0005752	0.1428	0.2116	0.2386	0.03891	0.5096	6.858e-06	18.264	20.251	18.559	20.936	15.114	16.706	14.048	14.827	12.48	11.898	13.589	14.849	13.828	16.685	15.223	14.398	18.196	19.103	17.871	20.064
FBgn0027868	Nup107	NUP107	protein_coding	-0.3375	0.0005771	-0.03682	0.8583	-0.02468	0.8841	-0.2854	0.0174	56.261	49.35	54.366	48.098	57.011	59.393	82.168	72.033	69.742	63.954	61.959	63.88	63.865	57.588	59.641	71.122	58.353	45.787	55.057	51.734
FBgn0015031	cype		protein_coding	0.3799	0.0005815	-0.05646	0.7336	-0.06973	0.65	-0.06605	0.7227	401.742	326.517	314.66	268.448	213.808	201.009	294.523	259.944	316.653	363.645	330.719	298.224	336.384	288.655	291.442	347.991	281.147	288.119	326.693	332.248
FBgn0033551	CG7222	DESI2	protein_coding	0.3256	0.000582	0.08705	0.5269	0.07221	0.6057	0.06134	0.7185	74.924	59.078	73.649	75.672	55.151	53.187	55.026	56.68	53.789	61.583	62.735	64.585	60.65	74.813	58.533	67.638	68.121	67.599	68.652	53.623
FBgn0035528	CG15012		protein_coding	0.2886	0.000582	0.03909	0.8363	0.04107	0.7697	0.1576	0.1852	137.044	122.556	126.354	140.492	112.732	100.037	108.219	101.571	105.485	106.439	115.864	104.218	111.225	128.881	97.426	122.64	123.357	121.927	115.688	135.517
FBgn0036263	thoc6		protein_coding	-0.2677	0.0005822	-0.09727	0.4196	-0.1843	0.0859	-0.1862	0.08693	16.823	18.534	17.166	16.568	20.846	21.612	21.662	20.454	23.283	25.383	20.965	19.258	23.055	19.783	19.542	21.043	18.267	23.263	17.347	19.85
FBgn0036514	CG12301	UTP14A,UTP14C	protein_coding	-0.5379	0.000585	-0.04773	0.7831	-0.097	0.5362	-0.05582	0.8099	21.328	19.121	18.913	18.797	32.476	34.669	27.042	27.949	30.21	29.51	19.274	23.089	27.182	19.682	22.206	24.859	19.177	23.603	30.679	19.425
FBgn0052137	CG32137		protein_coding	2.575	0.0005855	0.009286	0.9644	0.06206	0.6576	0.1326	0.4787	0.132	0.171	0.846	0.565	0.071	0.029	0.063	0.034	0.185	0.571	0	0.575	0.287	0.048	0.563	0.84	0.023	1.074	0.487	0.095
FBgn0040929	CG12659		protein_coding	0.5236	0.0006033	0.1412	0.2354	0.09726	0.5349	0.346	0.03953	20.051	15.39	17.032	16.817	9.893	10.448	12.779	11.665	15.683	14.781	7.966	18.443	16.912	15.871	16.999	14.148	14.261	20.499	22.477	13.359
FBgn0036124	CG7839		protein_coding	-0.487	0.0006092	-0.09547	0.4716	-0.2042	0.1426	-0.2643	0.09663	24.92	23.142	23.173	21.857	33.221	39.516	33.345	32.948	40.722	35.708	26.808	28.775	32.453	23.601	28.268	26.609	22.91	25.73	30.001	22.346
FBgn0267702	CR46035		ncRNA	1.761	0.0006098	0.0162	0.9216	0.25	0.2114	0.3204	0.1765	1.76	1.276	0.893	1.065	0.416	0.327	0.129	0.273	0	0.195	0.218	0.082	0.245	0.247	0.192	0	1.096	1.129	0.139	0.324
FBgn0034853	Ice1		protein_coding	-0.3054	0.0006129	0.07748	0.5872	0.04313	0.7747	0.175	0.1691	8.051	9.505	9.152	8.912	11.081	12.796	10.335	10.886	9.213	8.777	8.488	9.803	10.326	9.215	10.791	7.649	9.621	9.505	10.521	10.472
FBgn0035907	GstO1		protein_coding	-0.3574	0.0006132	-0.06748	0.6695	-0.07553	0.6155	0.07624	0.6711	20.884	21.34	20.567	19.809	27.053	27.237	26.548	28.624	28.461	27.475	24.921	25.092	22.553	24.6	17.676	31.09	23.071	22.043	27.691	33.671
FBgn0003964	usp		protein_coding	0.3352	0.0006179	0.06824	0.657	0.08307	0.552	0.1383	0.3259	42.32	43.625	43.432	47.448	32.355	31.416	35.438	37.033	26.616	29.728	32.638	30.298	32.935	34.941	31.753	28.519	38.121	37.677	31.597	32.283
FBgn0033639	CG9003		protein_coding	0.7217	0.0006203	0.05647	0.6887	0.1162	0.4267	0.1851	0.3238	24.15	22.973	18.012	22.139	12.806	15.68	9.22	9.668	8.47	9.33	20.235	13.095	11.587	22.257	13.632	13.642	23.174	20.297	14.58	15.834
FBgn0036710	CG6479		protein_coding	-0.3464	0.000623	0.03874	0.8518	-0.02404	0.8922	-0.05471	0.7714	17.998	19.72	19.015	20.254	24.244	23.812	27.001	26.074	23.039	25.986	25.255	29.959	27.196	22.407	21.985	25.561	24.179	25.539	21.44	24.08
FBgn0037313	CG1161		protein_coding	0.3651	0.0006243	0.0191	0.9489	0.1095	0.4305	0.1198	0.4465	80.959	72.449	76.498	80.641	58.199	50.491	62.529	61.446	50.859	55.804	66.783	59.734	57.231	62.618	64.29	69.915	65.17	57.271	62.385	73.567
FBgn0031089	CG9572		protein_coding	1.67	0.0006275	0.001893	0.9996	0.07492	0.5842	0.3611	0.1337	1.788	1.594	1.486	0.829	0.137	0.167	0.631	0.508	0.5	0.662	0.4	0.741	0.625	0.28	1.197	0.738	0.753	2.555	0.941	0.769
FBgn0015609	CadN		protein_coding	-0.8841	0.000629	-0.1071	0.3586	-0.121	0.3966	-0.1697	0.3742	5.867	12.038	6.946	7.388	15.349	17.912	16.775	18.153	14.6	11.685	15.915	6.93	7.69	12.998	10.643	6.292	12.508	8.728	7.376	14.639
FBgn0033117	CG3358	TATDN1	protein_coding	-0.3975	0.0006321	-0.09466	0.4875	-0.009232	0.9674	-0.00568	0.9874	25.816	27.8	21.484	23.405	34.385	32.949	35.085	33.004	28.486	24.28	30.029	20.015	19.803	29.965	23.355	27.666	30.076	24.064	24.272	32.684
FBgn0027085	LeuRS-m	LARS2	protein_coding	-0.3033	0.0006353	-0.00257	1	0.0111	0.9511	-0.03912	0.8268	18.72	19.46	20.18	19.375	23.883	30.416	21.515	22.24	23.778	22.2	24.382	23.933	23.594	22.721	25.938	22.087	23.65	22.3	23.297	22.425
FBgn0037513	pyd3	UPB1	protein_coding	1.044	0.0006359	-0.7206	0.02516	-1.765	5.524e-05	-1.77	3.1e-05	15.702	13.374	19.222	17.437	2.908	6.47	9.84	8.085	26.95	21.016	10.866	8.737	8.329	7.423	4.263	4.702	6.512	7.432	6.15	2.468
FBgn0051313	CG31313		protein_coding	1.598	0.0006405	-0.0004512	1	0.07513	0.5831	-0.08817	0.6435	0.752	1.012	1.187	1.188	0.206	0.195	0.357	0.371	0.3	1.276	0.583	1.363	0.729	0.294	0.686	2.483	0.466	0.336	0.33	0.616
FBgn0086779	step	CYTH1	protein_coding	0.3721	0.0006522	0.0523	0.7603	0.03341	0.8423	0.05567	0.7749	20.216	17.87	21.755	21.348	13.52	18.593	14.198	14.086	18.726	17.311	17.761	19.208	17.729	21.51	18.945	16.93	20.46	23.465	19.304	14.717
FBgn0265605	Ric	RIT2	protein_coding	0.3419	0.0006542	0.0575	0.7273	0.2121	0.09538	0.2194	0.1134	11.972	12.454	8.703	12.155	9.112	9.257	7.815	8.318	7.772	7.976	9.222	10.012	8.968	8.85	9.134	11.913	10.514	12.126	10.196	9.389
FBgn0001108	DCTN1-p150	DCTN1	protein_coding	0.3079	0.0006542	0.1954	0.05073	0.1233	0.3163	0.2285	0.04834	44.686	40.667	52.107	49.66	33.99	33.063	39.96	40.742	35.255	33.857	30.11	44.057	42.253	36.89	41.366	34.216	37.433	40.718	42.481	37.084
FBgn0083027	snoRNA:Psi18S-531		snoRNA	-0.7284	0.000661	-0.02855	0.8757	0.07455	0.6307	0.108	0.6063	33.049	28.041	28.36	26.848	55.091	54.476	47.379	57.867	28.988	27.833	26.35	24.385	19.786	27.607	39.367	34.816	30.613	40.279	39.577	24.909
FBgn0083992	Mkp		protein_coding	0.2429	0.000661	0.458	2.734e-07	0.3115	0.0006066	0.5711	1.465e-10	30.08	29.797	28.064	27.947	25.121	26.194	22.937	22.333	19.879	20.132	22.211	30.725	28.903	30.064	24.367	26.358	29.854	33.815	29.931	32.666
FBgn0260648	Rrp40	EXOSC3	protein_coding	-0.4559	0.0006632	-0.05896	0.7154	-0.1464	0.3036	-0.3161	0.04254	21.802	18.336	16.436	16.99	28.078	25.203	27.273	25.951	26.104	23.996	28.339	23.817	19.971	25.551	20.929	21.128	21.277	12.651	18.393	23.515
FBgn0000588	esc	EED	protein_coding	-0.5052	0.0006634	-0.0414	0.8315	-0.02317	0.909	-0.0839	0.686	17.588	18.804	19.831	19.012	29.984	25.059	30.082	29.373	24.111	24.881	33.419	20.845	26.61	27.271	26.603	23.184	29.301	23.589	17.422	33.186
FBgn0260458	PGRP-LD		protein_coding	0.3378	0.0006634	0.03993	0.8456	0.05351	0.7349	-0.09337	0.5756	11.77	11.291	9.867	10.583	9.068	8.581	8.088	7.617	6.38	8.344	9.434	8.742	8.039	9.21	9.119	8.055	9.109	7.4	6.412	8.365
FBgn0260780	wisp		protein_coding	0.7284	0.0006642	0.116	0.3264	0.5209	0.01465	0.4227	0.02923	0.656	1.272	0.615	0.59	0.529	0.372	0.403	0.401	0.828	1.227	1.573	1.422	1.196	2.571	1.636	2.429	2.582	2.051	2.532	1.687
FBgn0033274	CG14757	SDHAF2,AP003108.2	protein_coding	-0.7361	0.0006642	-0.02604	0.894	-0.05577	0.7399	-0.2742	0.1443	5.415	5.768	5.364	4.078	9.915	9.449	9.69	9.512	8.863	7.343	11.743	12.957	7.2	5.889	4.662	8.16	10.394	8.645	4.778	5.867
FBgn0037171	CG14459		protein_coding	4.335	0.0006642	0.1155	0.4577	0.2158	0.2806	0.5854	0.08426	0.071	0.075	0.041	0.062	0	0	0	0	0	0.015	0	0.051	0	0.064	0.09	0.061	0.012	0.221	0.022	0.051
FBgn0243512	puc		protein_coding	0.4274	0.0006666	0.1326	0.2748	0.01489	0.9462	0.106	0.5563	47.794	49.876	43.736	49.002	30.493	39.335	30.787	33.913	27.19	29.873	20.792	38.719	30.569	28.011	24.703	23.558	31.072	29.717	29.282	27.809
FBgn0031144	CG1529		protein_coding	-0.3349	0.0006748	-0.03334	0.8785	0.0532	0.7284	0.1474	0.295	18.519	22.044	18.852	18.974	22.825	23.168	27.683	28.254	19.444	18.218	20.264	16.319	17.141	21.33	22.065	18.085	22.026	22.224	23.166	20.958
FBgn0022702	Cht2		protein_coding	0.6089	0.0006811	0.01071	0.974	0.05609	0.7496	0.1593	0.3965	13.817	11.851	9.084	9.093	8.151	5.889	5.607	6.554	12.818	10.656	9.837	10.98	12.831	10.564	13.071	14.422	10.235	14.37	12.656	14.131
[truncated: 14,388 more rows]

## Sheet: Transposons
	Log2FC and padj reported by DESeq2		Log2 fold change and adjusted p-value reported by DESeq2 (re-analyzed from Fabry et al., 2019)						RPKM per sample								RPKM per sample (re-analyzed from Fabry et al., 2019)
[truncated: 123 more rows]
