# Supplementary material for: Dimerisation of the PICTS complex via LC8/Cut-up drives co-transcriptional transposon silencing in Drosophila
Source: eLife. 2021 Feb 4;10:e65557. doi: 10.7554/eLife.65557 (PMC7861614; doi:10.7554/eLife.65557)
Supplement: Figure 4—figure supplement 1—source data 1. [file elife-65557-fig4-figsupp1-data1.csv]

Accessions	Gene	Description	GeneSymbol	Unique_peptides	Cherry01	Cherry02	Cherry03	Panx01	Panx02	Panx03	PanxMut01	PanxMut02	PanxMut03	log2FC	CI.L	CI.R	P.Value	FDR
CG6998	ctp	ctp	ctp	2	20.04	20.26	19.68	23.78	25.2	24.34	20.53	20.94	20.62	-3.74	-4.205117838	-3.282502202	1.20E-08	8.80E-06
CG34163	CG34163	CG34163	CG34163	1	21.55	21.6	21.43	22.51	22.47	22.25	21.52	21.11	21.67	-0.98	-1.315404394	-0.638239229	9.50E-05	0.025
CG7421	Nopp140	Nopp140	Nopp140	6	22.54	23.49	22.69	23.67	24.32	23.56	22.77	23.73	23.05	-0.66	-0.910745848	-0.418245942	1.60E-04	0.025
CG9579	AnxB10	AnxB10	AnxB10	1	16.18	16.59	16.32	16.85	17.2	16.84	15.95	16.23	15.37	-1.11	-1.527177897	-0.700134022	1.60E-04	0.025
CG10473	Acn	Acn	Acn	2	18.13	18.76	18.46	19.66	20.48	20.38	19.07	19.35	19.37	-0.91	-1.252342239	-0.568506656	1.80E-04	0.025
CG42863	mv	mv	mv	1	22.81	22.71	22.78	23.4	23.09	23.32	22.78	22.65	22.69	-0.56	-0.775791773	-0.342633595	2.20E-04	0.026
CG11583	CG11583	CG11583	CG11583	4	19.86	20.09	20.04	21.16	21.53	21.15	20.5	20.4	20.72	-0.74	-1.063704509	-0.415488925	5.50E-04	0.049
CG1430	bys	bys	bys	6	22.57	22.49	22.76	22.95	22.89	22.93	22.54	22.22	22.4	-0.54	-0.772240153	-0.300699575	5.60E-04	0.049
CG1957	Cpsf100	Cpsf100	Cpsf100	1	16.36	16.77	17.02	17.63	18.38	18.12	18.62	19.09	18.82	0.8	0.42923896	1.172083663	8.10E-04	0.06
CG7939	RpL32	RpL32	RpL32	4	21.2	21.16	21.43	23	22.88	22.92	22.49	22.16	22.55	-0.54	-0.785276464	-0.286065741	8.40E-04	0.06
CG10576	CG10576	CG10576	CG10576	5	21.21	21.12	21.07	21.53	21.26	21.75	20.87	20.74	21.15	-0.59	-0.879910848	-0.299254067	0.0012	0.075
CG13096	CG13096	CG13096	CG13096	17	24.67	24.76	25.02	25.44	25.41	25.63	25.04	24.72	25.26	-0.49	-0.731877781	-0.239447521	0.0015	0.075
CG7194	CG7194	CG7194	CG7194	9	24.47	24.59	24.54	25.87	26.13	25.98	25.45	25.34	25.69	-0.5	-0.758488944	-0.242618442	0.0017	0.075
CG32599	CG32599	CG32599	CG32599	1	15.49	15.6	15.32	16.94	16.34	16.45	15.85	15.91	15.52	-0.81	-1.232031705	-0.390997059	0.0017	0.075
CG5787	CG5787	CG5787	CG5787	7	21.21	21.21	21.17	21.67	21.91	21.97	21.42	21.24	21.38	-0.5	-0.767926893	-0.240774901	0.0018	0.075
CG1404	Ran	Ran	Ran	6	22.63	22.63	22.78	23.26	23.08	23.22	22.69	22.59	22.96	-0.44	-0.671825862	-0.209623157	0.0018	0.075
CG17033	elgi	elgi	elgi	1	16.89	17.06	17.08	17.9	17.67	17.52	16.93	16.96	17.1	-0.7	-1.07514081	-0.3244884	0.0021	0.075
CG2875	CG2875	CG2875	CG2875	3	19.61	19.66	19.88	20.25	20.26	20.52	19.86	19.79	19.85	-0.51	-0.790872809	-0.232092688	0.0024	0.075
CG1666	Hlc	Hlc	Hlc	3	20.2	19.84	20.25	20.66	20.76	20.72	20.1	20.15	20.25	-0.55	-0.850737076	-0.249152605	0.0024	0.075
CG4202	Sas10	Sas10	Sas10	9	23.5	23.21	23.85	24.01	23.71	23.98	23.59	23.22	23.4	-0.5	-0.771152812	-0.22183467	0.0026	0.075
CG13097	CG13097	CG13097	CG13097	15	24.71	24.48	24.79	25.05	24.76	25.06	24.74	24.35	24.61	-0.39	-0.602370876	-0.172926479	0.0026	0.075
CG9253	CG9253	CG9253	CG9253	13	24.84	24.88	25.19	25.4	25.35	25.45	25.01	24.84	25.11	-0.41	-0.642626212	-0.183152527	0.0027	0.075
CG10206	nop5	nop5	nop5	16	25.21	24.98	25.46	25.76	25.59	25.71	25.35	25.06	25.4	-0.42	-0.651174099	-0.184731231	0.0027	0.075
CG3983	Ns1	Ns1	Ns1	4	22.4	21.84	22.21	23	22.74	22.72	22.25	22.05	22.54	-0.54	-0.844706532	-0.239260359	0.0028	0.075
CG11205	phr	phr	phr	5	21.29	21.29	21.44	22.03	21.68	21.78	21.57	21.11	21.35	-0.49	-0.758659545	-0.213311084	0.0028	0.075
CG9776	CG9776	CG9776	CG9776	1	17.79	17.93	18.13	18.67	20.01	20.09	18.26	18.95	17.93	-1.21	-1.894346187	-0.527706938	0.0029	0.075
CG11847	Clbn	Clbn	Clbn	8	21.58	21.78	22.07	22.32	22.33	22.3	21.83	21.87	21.75	-0.5	-0.784186385	-0.216472818	0.003	0.075
CG10302	bsf	bsf	bsf	5	19.82	20.09	19.73	20.43	20.57	20.32	20.8	21.34	20.7	0.5	0.216918757	0.785870246	0.003	0.075
CG8019	hay	hay	hay	3	18.97	19.38	18.88	19.71	19.87	19.63	19.04	19.19	19.24	-0.58	-0.913695977	-0.25128484	0.0031	0.075
CG14999	RfC4	RfC4	RfC4	5	20.97	21.21	20.85	22	22.31	21.87	21.37	21.74	21.67	-0.47	-0.732606647	-0.200138615	0.0032	0.075
CG11920	CG11920	CG11920	CG11920	7	23.6	23.38	23.81	24.04	23.76	23.96	23.65	23.35	23.55	-0.4	-0.634473984	-0.170279485	0.0034	0.075
CG31510	CG31510	CG31510	CG31510	2	19.34	19.19	18.49	20.46	21.11	19.25	19.33	18.97	19.08	-1.14	-1.804665015	-0.483382281	0.0034	0.075
CG5800	CG5800	CG5800	CG5800	8	22.18	22.34	22.21	22.75	22.95	22.8	22.23	22.2	22.61	-0.49	-0.766574172	-0.20397904	0.0035	0.075
CG33106	mask	mask	mask	1	15.73	16.32	16.15	16.99	17.22	17.12	16.5	16.36	16.43	-0.68	-1.075709268	-0.279903773	0.0037	0.075
CG5558	Nsun5;CG42359	Nsun5;CG42359	Nsun5;CG42359	6	22.23	22.21	22.51	22.89	22.79	22.78	22.52	22.12	22.46	-0.45	-0.717982519	-0.186111457	0.0038	0.075
CG7028	CG7028	CG7028	CG7028	7	21.54	22.47	21.88	22.67	23.19	22.46	21.99	22.2	22.25	-0.63	-0.996584495	-0.253764692	0.004	0.075
CG9107	CG9107	CG9107	CG9107	1	18.62	18.5	18.64	19.26	19.33	19.14	18.71	18.39	18.84	-0.59	-0.945092942	-0.240439242	0.004	0.075
CG16788	RnpS1	RnpS1	RnpS1	1	18.55	19.37	18.95	19.52	21.14	19.9	18.59	19.02	19.67	-1.09	-1.737594593	-0.441909991	0.004	0.075
CG6621	CG6621	CG6621	CG6621	3	18.88	19.38	19.21	20.15	20.48	20.03	19.58	19.93	19.64	-0.5	-0.808417796	-0.197593423	0.0046	0.083
CG7903	CG7903	CG7903	CG7903	3	19.11	19.33	19.3	19.91	19.81	19.81	19.27	18.93	19.54	-0.6	-0.967025289	-0.226637148	0.0052	0.092
CG3633	mRpS29	mRpS29	mRpS29	1	13.97	15.43	14.89	14.92	14.89	15.11	15.33	16.17	16.21	0.93	0.348401559	1.512890618	0.0054	0.093
CG3231	snama	snama	snama	3	18.1	18.15	17.77	19.11	19.37	19.18	18.56	18.37	18.79	-0.64	-1.045984675	-0.240287032	0.0055	0.093
CG7748	Stt3B	Stt3B	Stt3B	1	17.05	16.29	17.13	18.02	18.33	17.92	17.58	16.64	17.38	-0.89	-1.464582152	-0.320971654	0.0062	0.1
CG4165	Usp16-45	Usp16-45	Usp16-45	1	19.54	21.28	19.99	20.92	22.05	20.63	20.05	20.77	20.46	-0.78	-1.278519851	-0.276017079	0.0065	0.1
CG14206	RpS10b	RpS10b	RpS10b	5	24.69	24.53	24.79	25.13	24.83	25.02	24.75	24.52	24.72	-0.33	-0.54268157	-0.116667156	0.0065	0.1
CG16903	CG16903	CG16903	CG16903	6	22.09	22.52	22.21	22.89	23.13	22.87	22.45	22.85	22.6	-0.33	-0.54581512	-0.115613382	0.0068	0.1
CG4494	smt3	smt3	smt3	2	22.64	22.04	22.25	22.97	23.29	23.61	22.75	22.55	22.75	-0.61	-1.011453151	-0.209000582	0.0072	0.1
CG1276	TfIIEbeta	TfIIEbeta	TfIIEbeta	5	21.01	20.76	21.1	21.45	21.1	21.37	21.11	20.81	20.74	-0.42	-0.69850294	-0.143761329	0.0073	0.1
CG3460	Nmd3	Nmd3	Nmd3	2	21.68	21.82	21.79	22.17	22.11	22.03	21.8	21.74	21.73	-0.35	-0.577835574	-0.118864989	0.0073	0.1
CG7065	CG7065	CG7065	CG7065	4	20.3	20.66	20.39	20.93	21.22	21.18	20.63	20.89	20.67	-0.38	-0.629560875	-0.12934465	0.0073	0.1
CG2097	Sym	Sym	Sym	1	17.53	17.08	16.39	17.77	18.02	17.94	18.54	18.92	18.91	0.88	0.299287661	1.461760704	0.0074	0.1
CG2843	Cwc25	Cwc25	Cwc25	1	17.26	17.72	16.95	18.07	18.56	17.8	17.39	17.7	17.58	-0.59	-0.974609317	-0.198343739	0.0075	0.1
CG10281	TfIIFalpha	TfIIFalpha	TfIIFalpha	11	22.38	22.55	22.67	23.08	23.13	23.09	22.69	22.78	22.84	-0.33	-0.554581154	-0.112534131	0.0075	0.1
CG9004	CG9004	CG9004	CG9004	11	22.81	22.66	22.85	23.16	23.3	23.46	22.89	23.03	22.78	-0.41	-0.677425005	-0.133023606	0.0081	0.1
CG18178	CG18178	CG18178	CG18178	10	26.66	26.53	26.83	27.16	26.96	27.17	26.84	26.6	26.96	-0.29	-0.493061412	-0.094962766	0.0084	0.1
CG5605	eRF1	eRF1	eRF1	1	18.8	18.08	18.22	19.15	19.08	19.46	19.07	18.2	18.45	-0.66	-1.104596195	-0.211422004	0.0086	0.1
CG9606	Rrp45	Rrp45	Rrp45	2	20.17	20.33	20.34	21.07	20.78	20.79	20.46	20.41	20.48	-0.43	-0.719513099	-0.137507882	0.0086	0.1
CG3584	qkr58E-3	qkr58E-3	qkr58E-3	6	22.96	22.88	23.1	23.42	23.2	23.44	23.16	22.74	23.14	-0.34	-0.566008002	-0.107443192	0.0087	0.1
CG7698	Cpsf73	Cpsf73	Cpsf73	1	16.45	16.62	16.43	17.42	17.96	17.83	17.88	18.48	18.49	0.54	0.170702519	0.91556612	0.009	0.1
CG11274	SRm160	SRm160	SRm160	1	17.37	17.58	16.39	18.13	19.29	18.74	17.87	18.42	17.29	-0.86	-1.448989048	-0.269692144	0.0091	0.1
CG10689	l(2)37Cb	l(2)37Cb	l(2)37Cb	12	21.75	22.99	21.81	22.86	23.76	22.68	22.11	22.68	22.61	-0.63	-1.066023727	-0.198408737	0.0091	0.1
CG4789	CG4789	CG4789	CG4789	1	18.88	19.07	19.09	19.66	19.41	19.42	19.13	18.98	18.94	-0.48	-0.814262147	-0.150847798	0.0092	0.1
CG3335	CG3335	CG3335	CG3335	9	21.35	21.42	21.56	21.97	22.23	22.2	21.83	21.59	21.82	-0.38	-0.645566849	-0.119534702	0.0092	0.1
CG30159	CG30159	CG30159	CG30159	2	20.54	20.42	20.62	21.35	20.91	21.19	20.9	20.64	20.79	-0.37	-0.629688325	-0.116053916	0.0093	0.1
CG4152	Mtr4	Mtr4	Mtr4	14	22.27	22.13	22.13	22.79	22.99	22.87	22.5	22.57	22.57	-0.34	-0.567349337	-0.104144733	0.0093	0.1
CG1433	Atu	Atu	Atu	1	16.61	16.44	15.97	17.25	18.48	17.92	16.61	17.2	17.21	-0.88	-1.491852089	-0.269994664	0.0096	0.1
CG10955	Rtf1	Rtf1	Rtf1	4	20.95	21.28	21.34	22.05	22.59	22.17	21.51	22.17	21.95	-0.39	-0.659710403	-0.119331357	0.0096	0.1
CG4268	Pitslre	Pitslre	Pitslre	11	23.12	23.47	23.16	23.97	24.07	23.87	23.35	23.81	23.67	-0.36	-0.609377735	-0.108230932	0.01	0.1
CG6375	pit	pit	pit	23	26.08	25.89	25.87	26.58	26.73	26.71	26.25	26.32	26.43	-0.34	-0.577906596	-0.102468962	0.01	0.1
CG3527	CG3527	CG3527	CG3527	7	23.64	23.38	23.71	24.1	24	24.09	23.86	23.53	23.86	-0.32	-0.543402659	-0.095721917	0.01	0.1
CG7438	Myo31DF	Myo31DF	Myo31DF	3	19.35	19	19.18	20.17	19.93	19.86	19.54	19.44	19.66	-0.44	-0.75364568	-0.132638081	0.01	0.1
CG6013	CG6013	CG6013	CG6013	7	24.09	23.82	24.23	24.52	24.14	24.47	24.22	23.81	24.19	-0.3	-0.517139552	-0.090201711	0.01	0.1
CG9888	Fib	Fib	Fib	16	30.58	30.71	30.85	31.26	30.96	31.06	30.88	30.59	30.78	-0.35	-0.590187225	-0.10022802	0.011	0.11
CG6538	TfIIFbeta	TfIIFbeta	TfIIFbeta	2	20.99	20.65	21.03	21.37	21.29	21.28	20.95	20.91	20.98	-0.37	-0.629500248	-0.104249227	0.011	0.11
CG1263	RpL8	RpL8	RpL8	4	23.47	23.67	23.66	24.86	25.04	25.01	24.63	24.33	24.78	-0.39	-0.667332409	-0.109988625	0.011	0.11
CG10652	RpL30	RpL30	RpL30	3	23.64	23.69	23.99	24.83	24.59	24.91	24.51	24.21	24.63	-0.33	-0.564065225	-0.092350033	0.012	0.11
CG7971	CG7971	CG7971	CG7971	4	20.68	21.2	20.52	21.42	22.12	21.41	20.92	21.51	21.29	-0.41	-0.707716563	-0.115864732	0.012	0.11
CG2746	RpL19	RpL19	RpL19	6	21.43	21.82	21.85	23.43	23.51	23.58	23.09	22.9	23.35	-0.39	-0.670916341	-0.107338998	0.012	0.11
CG5258	NHP2	NHP2	NHP2	5	23.65	23.45	23.82	24.28	23.73	23.93	23.8	23.36	23.7	-0.36	-0.618617379	-0.098570056	0.012	0.11
CG5641	CG5641	CG5641	CG5641	4	21.5	21.25	21.31	21.9	21.69	21.84	21.59	21.34	21.58	-0.31	-0.53431089	-0.083814996	0.012	0.11
CG1671	CG1671	CG1671	CG1671	7	21.61	21.72	21.58	21.74	22.24	22.12	21.72	21.65	21.56	-0.4	-0.685737943	-0.104920568	0.013	0.11
CG31137	twin	twin	twin	1	17.05	17.36	17.34	18.6	18.47	18.2	18.06	17.73	17.85	-0.55	-0.947454873	-0.144203082	0.013	0.11
CG5247	Irbp	Irbp	Irbp	2	19.02	18.87	18.52	19.26	20.1	19.56	18.67	18.71	19.27	-0.76	-1.314624501	-0.199858372	0.013	0.11
CG7283	RpL10Ab	RpL10Ab	RpL10Ab	7	23.31	23.49	23.48	24.4	24.53	24.58	24.18	23.82	24.34	-0.39	-0.673918083	-0.101645752	0.013	0.11
CG18426	ytr	ytr	ytr	5	22.38	23.05	22.85	23.3	23.53	23.25	22.87	23.09	23.01	-0.37	-0.645365909	-0.094716446	0.014	0.11
CG7035	Cbp80	Cbp80	Cbp80	10	21.4	21.39	21.54	22.06	22.31	22.26	21.86	21.98	21.81	-0.33	-0.568840861	-0.082844103	0.014	0.11
CG11107	Dhx15	Dhx15	Dhx15	17	23.79	23.91	23.82	24.33	24.41	24.38	24.07	24.08	24.13	-0.28	-0.482756202	-0.069784766	0.014	0.11
CG8055	shrb	shrb	shrb	1	15.97	16.55	16.11	17.11	17.14	17.22	16.69	16.84	15.74	-0.73	-1.287077131	-0.18241698	0.015	0.11
CG6764	RpL24-like	RpL24-like	RpL24-like	3	20.19	20.43	20.47	21.22	21.29	21.35	20.9	20.75	21.14	-0.36	-0.631795893	-0.089491557	0.015	0.11
CG1542	CG1542	CG1542	CG1542	1	17.48	16.62	16.72	18.67	18.57	18.31	17.93	17.7	18.09	-0.61	-1.074942134	-0.151396053	0.015	0.11
CG1725	dlg1	dlg1	dlg1	3	19.11	19.88	20.1	20.4	20.94	20.59	20.29	19.32	19.54	-0.93	-1.628806712	-0.22911159	0.015	0.11
CG11522	RpL6	RpL6	RpL6	6	23.79	23.85	23.82	25.22	25.44	25.41	24.97	24.58	25.23	-0.43	-0.758038903	-0.106568488	0.015	0.11
CG8571	smid	smid	smid	11	22.14	22	22.07	22.86	23.34	23.28	22.69	22.82	22.84	-0.38	-0.660214992	-0.092501956	0.015	0.11
CG11604	mbm	mbm	mbm	2	19.67	19.78	19.57	20.83	20.84	20.28	19.46	19.76	20.46	-0.76	-1.328356751	-0.184672514	0.015	0.11
CG3949	hoip	hoip	hoip	4	23.83	23.86	24.22	24.57	24.4	24.62	24.28	23.88	24.42	-0.34	-0.590708307	-0.079879729	0.016	0.12
CG3998	zf30C	zf30C	zf30C	7	21.21	21.7	21.54	22.09	22.25	21.95	21.84	21.43	21.6	-0.47	-0.835832057	-0.112205626	0.016	0.12
CG5184	mRpS11	mRpS11	mRpS11	1	19.45	18.95	19.12	19.63	19.06	19.12	19.73	19.73	19.69	0.45	0.104350164	0.789559062	0.016	0.12
CG3203	RpL17	RpL17	RpL17	3	22.09	22.11	21.82	23.64	23.76	23.63	23.14	22.72	23.54	-0.54	-0.959038458	-0.126676017	0.016	0.12
CG16865	CG16865	CG16865	CG16865	1	18.81	20.28	19.43	20.34	21.15	19.87	19.54	19.74	19.78	-0.77	-1.355044569	-0.175763128	0.016	0.12
CG13472	Tdrd3	Tdrd3	Tdrd3	7	21.66	21.39	21.47	21.94	21.8	21.78	21.74	21.44	21.47	-0.29	-0.50909172	-0.065469915	0.017	0.12
CG4994	Mpcp2	Mpcp2	Mpcp2	1	17.49	17.62	17.25	18.21	18.96	18.66	18	17.69	18.2	-0.64	-1.140031536	-0.145256851	0.017	0.12
CG1828	dre4	dre4	dre4	47	29.09	28.9	28.85	29.33	29.53	29.35	28.98	29.05	29.21	-0.33	-0.576985255	-0.073384669	0.017	0.12
CG10449	Catsup	Catsup	Catsup	1	20.82	21.34	20.6	21.5	22.56	21.55	21.9	23.06	21.82	0.4	0.08910986	0.702119221	0.017	0.12
CG18809	CG18809	CG18809	CG18809	8	22.48	22.73	22.57	23.08	23.08	23.01	22.73	22.84	22.76	-0.28	-0.502001988	-0.063558144	0.017	0.12
CG3195	RpL12	RpL12	RpL12	3	24.21	24.03	24	24.97	25.14	25.07	24.84	24.5	24.8	-0.35	-0.6186415	-0.077013703	0.017	0.12
CG12076	Ythdc1	Ythdc1	Ythdc1	7	23.4	23.16	23.44	23.82	23.5	23.81	23.47	23.3	23.55	-0.27	-0.478231694	-0.059233454	0.017	0.12
CG9193	PCNA	PCNA	PCNA	2	20.2	20.02	20.25	20.79	20.73	20.7	20.56	20.12	20.45	-0.36	-0.645136837	-0.078687457	0.018	0.12
CG7878	CG7878	CG7878	CG7878	15	25.17	24.99	25.34	25.71	25.48	25.68	25.44	25.24	25.34	-0.28	-0.501714573	-0.059717982	0.018	0.12
CG17489	RpL5	RpL5	RpL5	9	24.26	24.31	24.31	25.32	25.57	25.49	25.13	24.94	25.31	-0.33	-0.594082974	-0.070387872	0.018	0.12
CG6937	CG6937	CG6937	CG6937	3	19.42	19.55	19.38	20.08	20.62	20.7	19.86	20.02	20.23	-0.43	-0.769735482	-0.088821266	0.019	0.12
CG5824	l(3)07882	l(3)07882	l(3)07882	10	21.97	21.67	21.85	22.27	22.37	22.37	21.92	21.95	22.17	-0.32	-0.579344526	-0.066819088	0.019	0.12
CG2063	CG2063	CG2063	CG2063	2	19.86	20.28	20.16	20.97	21.13	20.74	20.49	20.84	20.38	-0.38	-0.676224321	-0.07777527	0.019	0.12
CG2173	Rs1	Rs1	Rs1	4	18.75	19.02	18.64	20.23	20.52	20.37	19.8	19.39	20.18	-0.58	-1.050093202	-0.118000389	0.019	0.12
CG6712	CG6712	CG6712	CG6712	9	22.63	22.9	22.99	23.56	23.18	23.15	22.95	22.83	22.89	-0.41	-0.729840714	-0.082005314	0.019	0.12
CG6189	Mybbp1A	Mybbp1A	Mybbp1A	4	19.84	19.48	19.56	20.56	20.53	20.7	20.02	20.08	20.43	-0.42	-0.750590897	-0.083726108	0.02	0.12
CG7769	pic	pic	pic	5	20.13	20.13	20.05	21.04	21.65	21.52	20.95	20.99	21.06	-0.4	-0.72882124	-0.080499251	0.02	0.12
CG6905	Cdc5	Cdc5	Cdc5	2	19.13	18.96	19.02	19.88	19.88	20	19.54	19.34	19.74	-0.38	-0.683378362	-0.07342277	0.02	0.12
CG1676	cactin	cactin	cactin	14	22.67	24.36	23.27	24.15	25.15	23.73	23.41	23.69	23.7	-0.75	-1.347753522	-0.142471229	0.021	0.12
CG3314	RpL7A	RpL7A	RpL7A	11	24.1	24.27	24.27	25.57	25.75	25.74	25.38	24.99	25.56	-0.38	-0.683329688	-0.071833692	0.021	0.12
CG7338	Tsr1	Tsr1	Tsr1	6	21.29	21.31	21.5	21.77	21.87	21.83	21.62	21.27	21.6	-0.33	-0.599071689	-0.062853122	0.021	0.12
CG3499	YME1L	YME1L	YME1L	2	18.23	18.38	18.2	18.55	18.6	18.43	19	19.27	18.6	0.43	0.079702158	0.772456375	0.021	0.12
CG4087	RpLP1	RpLP1	RpLP1	3	23.83	23.91	23.99	25.49	25.72	25.74	25.23	24.91	25.63	-0.39	-0.713118504	-0.072539797	0.021	0.12
CG7622	RpL36	RpL36	RpL36	4	22.69	22.94	22.91	24.33	24.57	24.64	24.14	23.81	24.44	-0.39	-0.705193016	-0.071537723	0.021	0.12
CG9282	RpL24	RpL24	RpL24	4	23.67	23.77	23.6	25.09	25.25	25.25	24.9	24.66	25.03	-0.33	-0.60258137	-0.058108142	0.022	0.13
CG4817	Ssrp	Ssrp	Ssrp	23	28.84	28.65	28.62	29.07	29.26	29.08	28.81	28.86	28.91	-0.28	-0.506032667	-0.047394659	0.023	0.13
CG5519	Prp19	Prp19	Prp19	10	22.88	23.04	22.78	23.62	23.85	23.88	23.36	23.33	23.66	-0.34	-0.617766993	-0.057073474	0.023	0.13
CG7989	wcd	wcd	wcd	4	20.78	20.71	20.35	20.85	21.5	21.32	20.55	20.8	20.91	-0.47	-0.867268076	-0.079201591	0.024	0.13
CG6090	RpL34a	RpL34a	RpL34a	1	14.05	13.13	14.38	16.08	16.09	15.64	14.87	14.52	15.8	-0.87	-1.602613554	-0.145809163	0.024	0.13
CG2970	Stoml2	Stoml2	Stoml2	1	16.71	16.9	16.48	17.51	17.68	17.42	17.72	18.43	17.79	0.44	0.0727795	0.807401599	0.024	0.13
CG12740	RpL28	RpL28	RpL28	6	22.97	23.17	23.27	24.57	24.69	24.69	24.35	23.98	24.56	-0.35	-0.653940539	-0.056015458	0.025	0.13
CG1322	zfh1	zfh1	zfh1	3	19.22	19.25	19.05	19.63	20.01	19.86	19.24	19.64	19.48	-0.38	-0.696023467	-0.058872106	0.025	0.13
CG7483	CG7483	CG7483	CG7483	4	20.06	20.4	20.32	20.62	20.82	20.69	20.46	20.36	20.25	-0.35	-0.646318879	-0.054667548	0.025	0.13
CG8332	RpS15	RpS15	RpS15	5	27.34	27.07	27.6	28.01	27.38	27.76	27.63	27.03	27.59	-0.3	-0.549335395	-0.046216472	0.025	0.13
CG16812	CG16812	CG16812	CG16812	8	23.92	24.05	24.18	24.46	24.46	24.45	24.17	24.07	24.31	-0.27	-0.49801188	-0.039437027	0.026	0.14
CG7637	CG7637	CG7637	CG7637	3	23.27	23.39	23.56	24.07	23.56	23.84	23.67	23.2	23.54	-0.35	-0.654469526	-0.050752762	0.027	0.14
CG8675	CG8675	CG8675	CG8675	3	21.06	20.56	21.36	21.43	21.22	21.64	21.25	20.91	21.05	-0.36	-0.675716195	-0.048542434	0.028	0.15
CG7946	CG7946	CG7946	CG7946	8	22.45	22.45	22.64	23.03	22.79	22.9	22.65	22.65	22.6	-0.27	-0.511304492	-0.036105068	0.028	0.15
CG5383	PSR	PSR	PSR	6	21.97	21.53	21.72	22.18	22.48	22.6	21.9	22.07	22.15	-0.38	-0.711277579	-0.048896972	0.029	0.15
CG5313	RfC3	RfC3	RfC3	6	21.42	21.32	21.3	22.08	22.29	22.29	21.85	21.79	22.11	-0.31	-0.572805067	-0.039347938	0.029	0.15
CG15218	CycK	CycK	CycK	3	20.61	21.16	20.82	21.61	22.17	21.46	21.27	21.66	21.39	-0.31	-0.574983414	-0.037150439	0.03	0.15
CG8064	CG8064	CG8064	CG8064	5	20.64	20.4	20.33	20.67	21.22	21.01	20.37	20.43	20.77	-0.44	-0.834920138	-0.053355788	0.03	0.15
CG1866	Moca-cyp	Moca-cyp	Moca-cyp	11	23.81	24.52	24.19	24.91	24.92	24.73	24.4	24.63	24.49	-0.35	-0.652785355	-0.04161472	0.03	0.15
CG10701	Moe	Moe	Moe	1	17.16	17.33	17.51	18.28	18.25	18.65	17.88	18.1	18.06	-0.38	-0.721094203	-0.044492424	0.031	0.15
CG12396	Nnp-1	Nnp-1	Nnp-1	2	18.78	18.42	18.73	19.13	19.35	19.54	18.95	18.69	19.18	-0.4	-0.755117882	-0.046307229	0.031	0.15
CG6841	CG6841	CG6841	CG6841	9	21.61	21.22	21.4	21.92	22.42	22.13	21.68	21.93	21.65	-0.4	-0.752774914	-0.046073166	0.031	0.15
CG8857	RpS11	RpS11	RpS11	3	22.61	22.48	22.43	23.66	23.88	23.89	23.5	23.3	23.68	-0.31	-0.593371366	-0.035931919	0.031	0.15
CG18740	mor	mor	mor	2	17.1	17.32	17.32	18.08	18.33	18.31	17.81	18.06	17.68	-0.39	-0.729709836	-0.044021481	0.031	0.15
CG7357	Odj	Odj	Odj	1	15.74	16.11	16.26	17.15	17.2	16.95	16.71	16.8	16.26	-0.51	-0.96230178	-0.05641382	0.031	0.15
CG9680	Dbp73D	Dbp73D	Dbp73D	6	22.07	21.59	21.79	22.21	22.14	22.26	21.88	21.87	21.97	-0.3	-0.56514699	-0.03150575	0.032	0.15
CG8611	CG8611	CG8611	CG8611	6	20.52	20.74	20.72	21.07	21.45	21.41	21.08	20.6	21.05	-0.4	-0.759198354	-0.042131145	0.032	0.15
CG1406	U2A	U2A	U2A	5	22.98	23.14	23.09	23.53	23.66	23.59	23.3	23.38	23.42	-0.23	-0.438397076	-0.023518377	0.033	0.15
CG11875	Nup37	Nup37	Nup37	6	22.44	22.65	22.69	23.3	22.99	22.98	22.94	22.69	22.66	-0.33	-0.620567431	-0.032819272	0.033	0.15
CG12750	ncm	ncm	ncm	3	18.06	18.8	18.18	18.84	19.67	19.64	18.76	18.94	19.05	-0.47	-0.895714267	-0.044167629	0.034	0.16
CG9143	CG9143	CG9143	CG9143	14	24.71	25.01	25	25.49	25.31	25.33	25.05	24.88	25.25	-0.32	-0.604719883	-0.029351156	0.034	0.16
CG10223	Top2	Top2	Top2	46	25.88	25.94	25.73	26.7	27.23	26.96	26.37	26.35	26.93	-0.41	-0.790425946	-0.037849126	0.034	0.16
CG4208	XRCC1	XRCC1	XRCC1	10	23.29	23.17	23.47	23.78	23.73	23.87	23.66	23.42	23.56	-0.25	-0.471268293	-0.022530807	0.034	0.16
CG17266	CG17266	CG17266	CG17266	1	17.48	17.82	17.92	18.54	18.49	18.7	18.15	18.08	18.39	-0.37	-0.709141461	-0.032825749	0.035	0.16
CG9633	RpA-70	RpA-70	RpA-70	1	17.36	17.46	17.71	18.17	18.16	17.97	17.94	17.54	17.5	-0.44	-0.845624833	-0.035385947	0.036	0.16
CG6422	Ythdf	Ythdf	Ythdf	5	20.67	20.69	20.76	21.11	21.32	21.28	20.91	20.98	21.05	-0.26	-0.492556712	-0.01946159	0.037	0.16
CG1109	Wdr33	Wdr33	Wdr33	4	19.65	19.43	19.68	20.1	20.61	20.55	20.58	21.04	20.8	0.39	0.029381938	0.748831504	0.037	0.16
CG8306	CG8306	CG8306	CG8306	3	18.96	19.12	18.91	19.65	19.91	19.65	19.38	19.37	19.48	-0.33	-0.634124392	-0.023187698	0.038	0.17
CG7137	CG7137	CG7137	CG7137	6	22.6	22.6	22.86	23.33	23.01	23.17	22.93	22.73	23.05	-0.27	-0.511969752	-0.01803178	0.038	0.17
CG9641	CG9641	CG9641	CG9641	1	16.33	16.87	16.3	17.15	18.02	18.14	16.76	17.83	17.22	-0.5	-0.973315216	-0.033421807	0.038	0.17
CG17420	RpL15	RpL15	RpL15	5	23.35	23.54	23.62	24.97	25.25	25.22	24.85	24.56	25.09	-0.31	-0.604020677	-0.020182984	0.039	0.17
CG31156	CG31156	CG31156	CG31156	1	15.14	15.03	15.42	16.41	16.07	16.08	15.85	15.67	15.78	-0.42	-0.813099425	-0.026928202	0.039	0.17
CG1785	CG1785	CG1785	CG1785	8	22.26	22.54	22.58	23.09	22.92	23.02	22.72	22.53	22.9	-0.29	-0.568727609	-0.017994045	0.039	0.17
CG2199	CG2199	CG2199	CG2199	3	19.75	19.38	19.82	20.55	20.21	20.41	20.18	19.96	20.14	-0.29	-0.571774898	-0.017545517	0.039	0.17
CG11555	CG11555	CG11555	CG11555	5	23.71	23.51	23.63	24.01	24.27	24.32	23.97	23.89	23.92	-0.27	-0.530637368	-0.015485359	0.04	0.17
CG7490	RpLP0	RpLP0	RpLP0	9	24.3	24.32	24.31	25.57	25.77	25.71	25.37	25.02	25.66	-0.34	-0.652665599	-0.018835313	0.04	0.17
CG8801	Non1	Non1	Non1	1	18.07	17.63	17.66	19.56	20.37	20.27	19.14	19.41	19.9	-0.58	-1.137280479	-0.029626121	0.041	0.17
CG9203	mh	mh	mh	1	16.63	17.05	16.81	17.59	17.59	17.09	16.86	16.86	17.14	-0.47	-0.912500333	-0.023685649	0.041	0.17
CG4063	ebi	ebi	ebi	1	16.89	16.85	16.41	17.66	17.59	17.63	16.96	17.36	17.25	-0.43	-0.842195107	-0.021423864	0.041	0.17
CG11414	CG11414	CG11414	CG11414	1	17.48	17.29	17.52	18.53	18.21	18	18.1	17.69	17.81	-0.38	-0.744570979	-0.016673088	0.042	0.17
CG4912	eEF1delta	eEF1delta	eEF1delta	5	22.28	22.15	21.81	22.7	22.79	22.46	22.84	23.32	22.66	0.29	0.012776976	0.572209924	0.042	0.17
CG4901	CG4901	CG4901	CG4901	6	20.69	20.37	20.37	21.01	21.5	21.46	20.91	21.02	20.92	-0.37	-0.731469791	-0.015845435	0.042	0.17
CG17064	mars	mars	mars	1	14.48	13.85	14.64	14.96	15.5	15.6	14.84	14.73	14.84	-0.55	-1.073554532	-0.023012814	0.042	0.17
CG4510	Surf6	Surf6	Surf6	3	19.29	19.05	19.2	20.17	20.58	20.56	19.9	20.07	20.27	-0.35	-0.695230361	-0.013754595	0.043	0.17
CG7839	CG7839	CG7839	CG7839	14	23.2	22.66	22.93	23.17	23.32	23.55	23.01	22.91	23.15	-0.32	-0.631224501	-0.01209524	0.043	0.17
CG10128	tra2	tra2	tra2	2	21.11	21.81	21.23	21.9	22.1	21.5	21.68	21.59	21.2	-0.35	-0.680760776	-0.011700239	0.044	0.17
CG5581	Ote	Ote	Ote	6	21.96	21.57	21.92	22.11	21.94	22.3	21.8	21.76	22.04	-0.25	-0.489239299	-0.008291151	0.044	0.17
CG7977	RpL23A	RpL23A	RpL23A	8	24.57	24.46	24.62	25.76	25.93	25.97	25.67	25.33	25.84	-0.27	-0.543744509	-0.005942958	0.046	0.18
CG7351	PCID2	PCID2	PCID2	2	18.67	18.58	18.53	19.33	19.57	19.59	19	19.01	19.41	-0.36	-0.711827325	-0.007211453	0.046	0.18
CG12909	CG12909	CG12909	CG12909	11	26.23	25.91	26.32	26.52	26.36	26.52	26.41	26.12	26.14	-0.24	-0.476083243	-0.003589444	0.047	0.18
CG13625	CG13625	CG13625	CG13625	6	22.3	23.21	22.96	23.88	23.62	23.26	23.03	23.17	23.1	-0.49	-0.967213497	-0.005310377	0.048	0.18
CG4918	RpLP2	RpLP2	RpLP2	5	24.32	24.25	24.21	25.35	25.55	25.44	25.19	24.84	25.38	-0.31	-0.621307564	-0.003215889	0.048	0.18
CG8912	Psi	Psi	Psi	2	18.9	19.18	18.81	19.26	19.37	19.2	19.44	19.92	19.4	0.31	0.002295111	0.621628712	0.049	0.19
CG5728	CG5728	CG5728	CG5728	17	23.39	23.35	23.06	23.46	23.91	23.86	23.49	23.24	23.45	-0.35	-0.696959859	-0.002130983	0.049	0.19
CG5451	Smu1	Smu1	Smu1	5	28.35	28.33	28.49	29	28.71	28.66	28.65	28.45	28.56	-0.24	-0.469991605	-9.93E-04	0.049	0.19
CG7993	Non3	Non3	Non3	4	20.38	20.05	20.16	21.2	21.59	21.57	20.98	20.89	21.39	-0.37	-0.729899878	-3.93E-04	0.05	0.19
CG3875	nsr	nsr	nsr	1	19.32	19.59	19.8	20.22	20.03	20.27	19.94	19.68	19.92	-0.33	-0.654211856	-5.88E-05	0.05	0.19
CG4800	Tctp	Tctp	Tctp	3	20.91	20.31	20.28	20.87	21.4	21.32	21.41	22.21	21.58	0.54	-2.55E-05	1.072104816	0.05	0.19
CG4897	RpL7	RpL7	RpL7	14	24.47	24.58	24.54	25.93	26.17	26.17	25.87	25.46	26.02	-0.31	-0.617571243	0.002586919	0.052	0.19
CG32418	vito	vito	vito	3	20.05	20.41	20.5	21.01	20.92	20.79	20.76	20.43	20.46	-0.36	-0.721919591	0.003574116	0.052	0.19
CG4069	CG4069	CG4069	CG4069	5	22.35	22.38	22.3	23.17	22.9	22.74	22.64	22.68	22.72	-0.26	-0.523204754	0.002800301	0.052	0.19
CG2028	CkIalpha	CkIalpha	CkIalpha	5	21.5	21.57	21.56	22.14	22.14	22.06	22.01	21.82	21.82	-0.23	-0.463166255	0.002757578	0.052	0.19
CG5792	Pih1D1	Pih1D1	Pih1D1	2	18.66	18.73	18.77	19.27	19.43	19.3	18.99	18.97	19.14	-0.3	-0.606776484	0.003817919	0.052	0.19
CG18259	CG18259	CG18259	CG18259	14	26.46	26.66	26.83	27.27	26.88	26.95	26.87	26.61	26.74	-0.29	-0.59468443	0.006556052	0.054	0.19
CG3733	Chd1	Chd1	Chd1	2	18.06	18.78	19.02	19.51	19.9	19.98	19.37	19.2	19.63	-0.4	-0.804156034	0.009028416	0.054	0.19
CG17540	Spf45	Spf45	Spf45	1	18.13	17.89	18.01	18.47	19.05	19.05	19	19.5	19.29	0.41	-0.01086947	0.826041604	0.055	0.2
CG12608	CG12608	CG12608	CG12608	8	25.54	26.16	25.86	26.64	26.76	26.19	25.98	26.15	26.36	-0.37	-0.748707557	0.010735389	0.056	0.2
CG9018	CG9018	CG9018	CG9018	5	21.06	20.93	20.98	21.6	21.48	21.53	21.46	21.21	21.28	-0.22	-0.444007343	0.006841362	0.056	0.2
CG6686	CG6686	CG6686	CG6686	25	25.18	26.22	25.79	26.44	26.58	25.96	25.86	25.9	25.9	-0.44	-0.890985121	0.013837898	0.056	0.2
CG11076	CG11076	CG11076	CG11076	5	21.71	21.61	21.61	22	22.05	22.07	21.84	21.81	21.84	-0.21	-0.433114452	0.006876564	0.056	0.2
CG18591	SmE	SmE	SmE	3	23.36	23.27	23.39	23.8	23.6	23.94	23.6	23.36	23.74	-0.21	-0.435107936	0.007009787	0.056	0.2
CG7843	Ars2	Ars2	Ars2	23	24.33	24.29	24.43	24.83	25.13	25.03	24.69	24.89	24.72	-0.23	-0.46471653	0.007782086	0.057	0.2
CG4111	RpL35	RpL35	RpL35	2	20.77	20.43	20.64	21.79	22.05	22.24	21.88	21.16	21.92	-0.37	-0.759211712	0.015700538	0.058	0.2
CG3071	CG3071	CG3071	CG3071	2	18.54	18.63	18.13	18.98	19.25	19.28	18.52	18.95	18.89	-0.38	-0.780799999	0.017173016	0.059	0.2
CG4464	RpS19a	RpS19a	RpS19a	6	24.39	24.29	24.3	25.11	25.28	25.24	25.02	24.83	25.08	-0.23	-0.474041129	0.010591919	0.059	0.2
CG8460	CG8460	CG8460	CG8460	2	19.24	18.71	19.05	19.84	19.35	19.74	19.37	19.2	19.48	-0.3	-0.603823101	0.013506302	0.059	0.2
CG9911	CG9911	CG9911	CG9911	2	19.88	20.15	19.77	20.35	20.77	20.29	20.56	21.38	20.41	0.31	-0.016130171	0.635874192	0.06	0.2
CG7597	Cdk12	Cdk12	Cdk12	8	21.29	22.2	21.57	22.38	22.77	22.12	21.97	22.27	22.1	-0.31	-0.633212632	0.017175571	0.061	0.2
CG14788	Ns3	Ns3	Ns3	16	23.59	23.16	23.47	23.81	23.66	23.96	23.71	23.46	23.61	-0.22	-0.449457815	0.012489213	0.061	0.2
CG3751	RpS24	RpS24	RpS24	2	22.59	22.09	22.11	23.43	23.72	23.8	23.33	23.06	23.5	-0.35	-0.730986955	0.022779632	0.063	0.21
CG15119	mip40	mip40	mip40	2	18.22	18.06	18.37	19.03	18.59	18.91	18.49	18.59	18.45	-0.34	-0.692578025	0.022453861	0.063	0.21
CG11030	CG11030	CG11030	CG11030	2	20.02	19.74	19.77	20.32	20.67	20.59	19.91	20.32	20.33	-0.34	-0.702388093	0.023733033	0.064	0.21
CG5931	l(3)72Ab	l(3)72Ab	l(3)72Ab	31	24.16	24.62	23.83	24.48	24.96	24.66	24.36	24.54	24.37	-0.28	-0.575264512	0.021736708	0.066	0.21
CG9373	rump	rump	rump	8	24.24	24.11	24.22	24.67	24.74	24.91	24.32	24.59	24.72	-0.23	-0.478086105	0.018092827	0.066	0.21
CG9246	CG9246	CG9246	CG9246	9	22.76	22.35	22.42	22.94	22.99	23.15	22.73	22.61	22.94	-0.27	-0.555729381	0.021341852	0.066	0.21
CG9750	rept	rept	rept	2	18.75	18.54	18.67	19.42	19.77	19.91	19.14	19.58	19.36	-0.34	-0.71632807	0.028529992	0.066	0.22
CG4978	Mcm7	Mcm7	Mcm7	1	17.01	17.33	17.54	18.05	18.35	17.8	17.87	17.53	17.48	-0.44	-0.914979936	0.036840687	0.067	0.22
CG12301	CG12301	CG12301	CG12301	1	18.47	18.27	18.41	18.9	19.28	19.36	18.7	18.22	19.29	-0.45	-0.928827083	0.03808948	0.067	0.22
CG2260	CG2260	CG2260	CG2260	4	20.39	20.46	20.49	20.81	21.06	21.11	20.65	20.53	21	-0.26	-0.551842089	0.023568056	0.068	0.22
CG6876	Prp31	Prp31	Prp31	7	21.32	21.45	21.67	21.98	22.02	21.96	21.76	21.74	21.77	-0.23	-0.477339825	0.022183795	0.07	0.22
CG8264	Bx42	Bx42	Bx42	2	18.53	18.36	18.36	18.88	19.21	19.36	18.76	18.82	18.88	-0.33	-0.688941426	0.032239814	0.07	0.22
CG7172	CRIF	CRIF	CRIF	1	18.57	18.91	18.66	19.07	19.14	18.79	19.45	19.59	18.92	0.32	-0.032287507	0.672736337	0.07	0.22
CG32701	l(1)G0320	l(1)G0320	l(1)G0320	1	19.76	18.11	19.7	20.29	20.01	20.08	19.32	19.49	19.69	-0.63	-1.324944922	0.069224108	0.072	0.23
CG10203	x16	x16	x16	4	25.06	25.73	25.22	25.91	26.2	25.71	25.4	25.47	25.88	-0.36	-0.753442917	0.039667649	0.072	0.23
CG3167	MAN1	MAN1	MAN1	2	19.97	19.67	19.43	20.34	20	20.34	19.95	19.66	20.1	-0.33	-0.692742247	0.038109143	0.074	0.23
CG11844	vig2	vig2	vig2	10	25.64	25.28	25.41	25.81	25.89	25.93	25.66	25.59	25.73	-0.22	-0.462056871	0.025535632	0.074	0.23
CG6510	RpL18A	RpL18A	RpL18A	8	24.18	24.37	24.27	25.46	25.67	25.61	25.36	25.02	25.54	-0.28	-0.583669112	0.032795453	0.074	0.23
CG2863	Nle	Nle	Nle	2	18.18	17.93	17.98	18.44	18.79	18.81	18.39	17.89	18.59	-0.39	-0.833622698	0.049341282	0.076	0.23
CG7697	CstF64	CstF64	CstF64	5	21.46	21.56	21.33	22.02	22.29	22.16	22.2	22.47	22.44	0.21	-0.027311693	0.454291126	0.076	0.23
CG6413	Dis3	Dis3	Dis3	5	20.52	20.91	20.73	21.4	21.2	21.25	21.11	20.89	21.04	-0.27	-0.581539104	0.035200732	0.076	0.23
CG4236	Caf1-55	Caf1-55	Caf1-55	1	19.11	18.97	18.04	20.12	19.99	20.17	19.58	19.72	19.62	-0.45	-0.961415089	0.058830167	0.077	0.23
CG11130	Rtc1	Rtc1	Rtc1	1	17.85	17.63	17.79	18.48	18.48	18.44	18.23	18.04	18.29	-0.28	-0.60090644	0.042697213	0.082	0.25
CG5913	CG5913	CG5913	CG5913	8	22.79	22.54	22.64	22.94	23.01	23.08	22.83	22.72	22.87	-0.2	-0.430682173	0.031896414	0.083	0.25
CG5502	RpL4	RpL4	RpL4	16	25.21	25.35	25.31	26.68	27.02	26.93	26.66	26.3	26.85	-0.27	-0.588844771	0.044092359	0.084	0.25
CG8068	Su(var)2-10	Su(var)2-10	Su(var)2-10	3	19.22	19.08	18.81	19.94	20.37	20.21	19.68	19.85	20.01	-0.33	-0.710277258	0.053745619	0.084	0.25
CG11266	Caper	Caper	Caper	16	26.96	27.35	27.28	27.83	27.76	27.7	27.56	27.53	27.54	-0.22	-0.472997647	0.035906902	0.084	0.25
CG15784	CG15784	CG15784	CG15784	1	19.15	19.3	18.74	19.46	20.74	21.19	19.94	18.91	20.07	-0.82	-1.794249806	0.144739783	0.086	0.25
CG10851	B52	B52	B52	8	26.75	27.09	26.97	27.5	27.56	27.59	27.19	27.54	27.38	-0.18	-0.396691343	0.030770795	0.085	0.25
CG1677	CG1677	CG1677	CG1677	3	19.32	19.87	19.27	19.95	20.94	20.39	20.13	20.12	19.98	-0.35	-0.758961562	0.060209183	0.086	0.25
CG1475	RpL13A	RpL13A	RpL13A	4	22.84	23.38	22.96	24	24.19	23.77	23.87	23.88	23.52	-0.23	-0.501676361	0.039998744	0.086	0.25
CG6340	CG6340	CG6340	CG6340	8	23.42	24.72	23.96	24.81	25.23	24.14	24.27	24.61	24.1	-0.4	-0.867528436	0.069678744	0.087	0.25
CG12288	CG12288	CG12288	CG12288	2	19.14	19.15	19.28	20.18	20.47	20.47	20.05	19.96	20.34	-0.25	-0.552173946	0.044825071	0.087	0.25
CG15415	Spindly	Spindly	Spindly	12	22.75	22.37	22.23	22.93	23.45	23.28	23.33	24.24	23.34	0.41	-0.075161421	0.901563672	0.088	0.25
CG6846	RpL26	RpL26	RpL26	8	24.54	24.69	24.8	25.54	25.46	25.51	25.41	25.03	25.39	-0.22	-0.488900143	0.041097679	0.089	0.25
CG17665	IntS3	IntS3	IntS3	1	15.48	15.38	15.79	15.6	17.02	16.77	15.95	15.72	16.07	-0.55	-1.200536425	0.102845165	0.089	0.26
CG3186	eEF5	eEF5	eEF5	1	19.2	18.86	19.04	19.94	20.12	20.14	20.07	20.89	20.36	0.38	-0.07202789	0.822138564	0.091	0.26
CG5214	CG5214	CG5214	CG5214	3	19.35	19.08	19.38	20.7	20.6	20.37	20.51	20.36	19.89	-0.3	-0.669294907	0.060519074	0.092	0.26
CG2922	kra	kra	kra	2	21.07	21.13	21.2	21.63	21.27	21.4	22.07	21.95	21.28	0.33	-0.066652649	0.725986665	0.093	0.26
CG8877	Prp8	Prp8	Prp8	35	24.08	23.97	23.8	24.52	25.06	24.9	24.48	24.72	24.53	-0.25	-0.560613567	0.054338772	0.096	0.27
CG8153	Xpc	Xpc	Xpc	1	21.71	22.19	22.31	22.89	22.48	22.45	22.34	22.33	22.12	-0.34	-0.75159244	0.073042518	0.096	0.27
CG5645	CG5645	CG5645	CG5645	8	23.97	23.75	23.67	24.13	24.35	24.28	23.99	24.08	24.05	-0.21	-0.471939121	0.046468042	0.097	0.27
CG1513	CG1513	CG1513	CG1513	1	20.92	21.58	20.9	21.3	22.06	21.34	21.04	21.98	21.11	-0.19	-0.428345772	0.042700105	0.097	0.27
CG6815	bor	bor	bor	10	21.46	21.41	21.2	22.73	23.18	22.91	22.57	22.58	22.87	-0.26	-0.585983113	0.058812044	0.098	0.27
CG12775	RpL21	RpL21	RpL21	4	23.33	23.34	23.38	24.63	24.74	24.86	24.56	24.26	24.76	-0.22	-0.480957567	0.048535066	0.098	0.27
CG10305	RpS26	RpS26	RpS26	2	23.32	23.12	23.27	24.02	24.32	24.32	24	23.9	24.12	-0.21	-0.476844287	0.048211297	0.098	0.27
CG4452	CG4452	CG4452	CG4452	3	22.13	22.55	22.67	23.19	22.94	22.96	22.95	22.55	22.69	-0.3	-0.669784862	0.068319312	0.099	0.27
CG11840	Spp	Spp	Spp	1	18.06	18.11	18	19.08	19.34	18.92	19.22	19.43	19.53	0.28	-0.064125274	0.627480624	0.099	0.27
CG43770	Sxl	Sxl	Sxl	2	19.29	19.52	19.55	19.97	20.03	20.08	19.89	19.69	19.75	-0.25	-0.551783799	0.057802084	0.1	0.27
CG10628	CG10628	CG10628	CG10628	2	19.5	19.3	19.4	20.05	19.67	19.91	19.67	19.58	19.68	-0.23	-0.517346995	0.054514867	0.1	0.27
CG13773	CG13773	CG13773	CG13773	3	20.9	20.69	20.94	21.26	21.34	21.14	20.89	21.05	21.12	-0.23	-0.509636576	0.055629765	0.1	0.28
CG14817	CG14817	CG14817	CG14817	1	17.25	17	17.22	18.73	18.09	18.02	18	18.08	17.76	-0.33	-0.752049363	0.083510089	0.1	0.28
CG9854	hrg	hrg	hrg	5	21.34	21.42	21.38	21.67	22	21.93	21.64	21.6	21.76	-0.2	-0.447610094	0.050173834	0.1	0.28
CG7183	CG7183	CG7183	CG7183	1	16.04	16.88	16.24	17.06	17.01	16.78	16.69	16.81	16.3	-0.35	-0.790282262	0.090230218	0.11	0.28
CG12877	CG12877	CG12877	CG12877	1	16.57	16.83	16.92	17.08	17.42	17.38	17.03	16.76	17.18	-0.3	-0.679020564	0.079553821	0.11	0.29
CG6122	piwi	piwi	piwi	32	27.9	28.41	28.12	28.71	28.58	28.42	28.38	28.41	28.25	-0.22	-0.500766393	0.058719463	0.11	0.29
CG2691	CG2691	CG2691	CG2691	9	21.68	21.48	21.44	22.22	22.35	22.47	21.98	22.18	22.23	-0.22	-0.491320912	0.058326044	0.11	0.29
CG4806	CG4806	CG4806	CG4806	4	19.71	19.74	19.46	20.15	20.77	20.47	19.8	20.23	20.44	-0.31	-0.705402218	0.08476867	0.11	0.29
CG7111	Rack1	Rack1	Rack1	10	26.89	26.71	26.71	27.28	27.14	27.2	27.12	26.92	27.11	-0.16	-0.358322416	0.043687893	0.11	0.29
CG10753	SmD1	SmD1	SmD1	4	23.72	23.04	23.41	24.21	24.14	24.38	24.22	24.02	23.59	-0.3	-0.689620684	0.084798208	0.11	0.29
CG2931	CG2931	CG2931	CG2931	4	22.1	22.22	22.47	22.68	22.58	22.61	22.48	22.15	22.6	-0.21	-0.490268709	0.061030912	0.11	0.29
CG1810	mRNA-cap	mRNA-cap	mRNA-cap	3	20.65	20.4	20.41	21.04	21.39	21.23	20.82	21.22	20.87	-0.25	-0.574593154	0.072104118	0.11	0.29
CG33522	scaf6	scaf6	scaf6	2	18.35	17.92	17.81	18.85	19.13	19.03	18.46	18.63	18.89	-0.35	-0.790144342	0.099438468	0.11	0.29
CG1710	Hcf	Hcf	Hcf	1	16.7	16.95	16.64	17.49	17.54	17.72	17.31	17.49	17.1	-0.29	-0.657601228	0.083760646	0.11	0.29
CG41128	CG41128	CG41128	CG41128	1	18.38	18.46	18.79	19.39	19.46	19.15	19.64	19.79	19.46	0.3	-0.087102499	0.681638322	0.11	0.29
CG12753	ema	ema	ema	1	17.29	17.23	17.53	17.8	17.88	17.59	17.95	18.26	17.95	0.3	-0.088095495	0.678723193	0.12	0.3
CG4849	CG4849	CG4849	CG4849	12	22.96	22.75	22.61	23.31	23.86	23.68	23.31	23.39	23.39	-0.26	-0.588373909	0.076809399	0.12	0.3
CG4863	RpL3	RpL3	RpL3	7	24.09	24.17	24.09	25.28	25.52	25.47	25.26	25.02	25.37	-0.21	-0.47332144	0.062650268	0.12	0.3
CG42668	CG42668	CG42668	CG42668	1	16.56	16.74	16.35	17.03	17.4	17.33	17.03	17.06	16.82	-0.28	-0.656192488	0.087305882	0.12	0.3
CG7434	RpL22	RpL22	RpL22	3	25.19	25.35	25.7	25.94	25.57	25.89	25.74	25.29	25.69	-0.23	-0.528762304	0.071954356	0.12	0.3
CG4364	CG4364	CG4364	CG4364	7	22.14	22.21	21.98	22.28	22.72	22.66	22.4	22.29	22.3	-0.22	-0.514437728	0.07111605	0.12	0.3
CG14230	CG14230	CG14230	CG14230	16	26.01	25.42	25.86	26.26	26.37	26.54	26.15	26.1	26.24	-0.22	-0.521867362	0.07236103	0.12	0.3
CG11788	CG11788	CG11788	CG11788	1	17.12	17.08	16.81	17.73	17.66	17.71	17	17.71	17.42	-0.33	-0.76086947	0.10565246	0.12	0.3
CG8615	RpL18	RpL18	RpL18	5	23.19	23.61	23.54	24.68	25.03	24.95	24.72	24.49	24.77	-0.23	-0.524306396	0.074105427	0.12	0.31
CG18081	CG18081	CG18081	CG18081	1	21.81	21.4	21.75	22.26	22.19	22.29	22.52	22.47	22.35	0.2	-0.0671718	0.462760788	0.13	0.31
CG4759	RpL27	RpL27	RpL27	4	24.02	24.13	24.15	25.07	24.92	25.03	24.95	24.41	24.98	-0.22	-0.525341251	0.076387455	0.13	0.31
CG13350	Ctf4	Ctf4	Ctf4	1	17.32	16.92	16.83	17.67	18.97	18.41	17.49	18.34	17.82	-0.47	-1.092240102	0.16028463	0.13	0.31
CG2099	RpL35A	RpL35A	RpL35A	1	19.94	20.89	20.7	22.11	22.34	22.37	21.99	21.64	22.17	-0.34	-0.787734546	0.117280946	0.13	0.32
CG7008	Tudor-SN	Tudor-SN	Tudor-SN	4	20.33	20.2	20.42	22.01	21.47	22.08	22.15	21.37	20.7	-0.45	-1.049242443	0.158751975	0.13	0.32
CG16940	Dis3l2	Dis3l2	Dis3l2	1	16.09	15.63	15.92	17.86	18.22	17.84	17.65	17.08	18.02	-0.39	-0.929755029	0.141383221	0.13	0.32
CG2706	fs(1)Yb	fs(1)Yb	fs(1)Yb	17	23.63	23.78	23.46	24.18	24.28	24.25	24.29	24.73	24.26	0.19	-0.067346456	0.442097071	0.13	0.32
CG8939	CG8939	CG8939	CG8939	5	19.71	19.99	19.53	20.64	21.35	21.42	20.59	20.74	21.13	-0.31	-0.743257056	0.114833636	0.13	0.32
CG4651	RpL13	RpL13	RpL13	4	23.45	23.68	23.59	24.98	25.27	25.25	24.97	24.63	25.2	-0.23	-0.554284849	0.089263133	0.14	0.33
CG8436	Ibf1	Ibf1	Ibf1	4	21.27	21.23	21.26	21.67	21.97	21.83	21.45	21.81	21.65	-0.18	-0.434055816	0.070217912	0.14	0.33
CG11622	Rlip	Rlip	Rlip	1	16.27	16.03	16.72	17.11	16.88	17.18	17.39	18.08	17.06	0.45	-0.176979282	1.084068676	0.14	0.33
CG9630	CG9630	CG9630	CG9630	6	21.06	20.99	20.99	21.35	21.56	21.36	21.3	21.15	21.27	-0.18	-0.437592802	0.071795649	0.14	0.33
CG17521	RpL10	RpL10	RpL10	4	23.85	23.95	23.82	24.8	25.01	25	24.77	24.45	24.95	-0.22	-0.518595527	0.085417887	0.14	0.33
CG6253	RpL14	RpL14	RpL14	8	23.96	24.16	24.13	25.51	25.71	25.77	25.49	25.14	25.71	-0.22	-0.520584444	0.086240583	0.14	0.33
CG3613	qkr58E-1	qkr58E-1	qkr58E-1	17	24.54	24.32	24.72	24.82	24.69	24.94	24.67	24.6	24.71	-0.16	-0.378823472	0.063141834	0.14	0.33
CG8044	HP4	HP4	HP4	1	18.79	18.48	19.31	19.97	19.2	19.57	19.47	18.91	19.53	-0.28	-0.673776273	0.113139372	0.14	0.33
CG2048	dco	dco	dco	2	21.01	20.95	20.84	21.13	21.43	21.72	21.3	21.06	21.18	-0.25	-0.594650114	0.100047193	0.14	0.33
CG11661	Nc73EF	Nc73EF	Nc73EF	5	21.03	21.1	21.01	21.73	21.52	21.4	21.51	21.36	21.26	-0.17	-0.418570009	0.070921505	0.14	0.33
CG10466	CG10466	CG10466	CG10466	2	22.1	22.82	22.54	23.2	23.22	22.95	22.62	23.09	22.96	-0.23	-0.561124619	0.095641732	0.14	0.33
CG1825	Map60	Map60	Map60	2	19.97	20.06	19.95	20.6	20.41	20.16	20.82	20.78	20.24	0.22	-0.091664465	0.537132691	0.14	0.33
CG33553	Doa	Doa	Doa	6	22.26	22.72	22.47	23.04	23.51	23.06	22.86	23.25	23.03	-0.16	-0.375141478	0.064125361	0.14	0.33
CG5836	SF1	SF1	SF1	11	23.8	23.98	23.98	24.42	24.28	24.48	24.32	24.22	24.09	-0.18	-0.435396763	0.074774799	0.15	0.33
CG8900	RpS18	RpS18	RpS18	8	26.35	26.29	26.45	26.87	26.6	26.87	26.68	26.35	26.84	-0.16	-0.377844051	0.06510647	0.15	0.33
CG4972	CG4972	CG4972	CG4972	1	16.32	16.51	16.47	16.99	16.83	17.21	17.38	17.22	17.21	0.26	-0.110065348	0.63128433	0.15	0.34
CG4264	Hsc70-4	Hsc70-4	Hsc70-4	16	25.19	25.06	25.15	25.72	25.88	25.9	25.72	25.65	25.67	-0.16	-0.376382705	0.066032926	0.15	0.34
CG5320	Gdh	Gdh	Gdh	18	26.07	26.19	25.44	26.22	26.35	26.01	26.16	26.62	26.6	0.27	-0.115249616	0.652634707	0.15	0.34
CG6987	SF2	SF2	SF2	11	28.85	29.18	29.13	29.64	29.36	29.35	29.33	29.19	29.25	-0.19	-0.474030346	0.084968357	0.15	0.34
CG7885	RpII33	RpII33	RpII33	2	19.62	19.51	19.51	20.27	20.35	20.63	20.13	20.24	20.23	-0.21	-0.509113561	0.092057376	0.15	0.34
CG1938	Dlic	Dlic	Dlic	1	17.09	17.27	17.03	17.45	17.77	17.68	17.29	17.62	17.3	-0.23	-0.560393582	0.101909161	0.15	0.34
CG3756	CG3756	CG3756	CG3756	3	21.71	21.77	21.54	22.24	22.69	22.56	22.16	21.92	22.59	-0.27	-0.660528926	0.121364634	0.15	0.35
CG17170	su(f)	su(f)	su(f)	6	21.27	21.16	21	21.74	21.97	21.8	21.84	22.17	22.07	0.19	-0.086517343	0.459802347	0.16	0.35
CG16932	Eps-15	Eps-15	Eps-15	7	21.71	22.09	21.66	22.48	22.45	22.16	22.41	22.75	22.45	0.17	-0.080377259	0.426575655	0.16	0.35
CG17520	CkIIalpha	CkIIalpha	CkIIalpha	13	24.4	24.22	24.2	24.75	25.08	24.88	24.6	24.7	24.85	-0.19	-0.46804509	0.088790606	0.16	0.35
CG5527	Nep7	Nep7	Nep7	1	15.37	15.75	14.97	16.47	16.33	15.93	15.73	16.38	15.74	-0.29	-0.721209697	0.13712981	0.16	0.35
CG8241	pea	pea	pea	18	23.42	23.43	23.47	23.78	23.82	23.81	23.7	23.65	23.64	-0.14	-0.349303366	0.066579951	0.16	0.35
CG2098	FeCH	FeCH	FeCH	2	19.65	20.24	20.46	21.12	20.54	20.89	20.49	20.41	20.71	-0.31	-0.770706647	0.148203477	0.16	0.35
CG8367	cg	cg	cg	3	20.31	20.39	20.42	20.85	20.95	20.78	20.66	20.77	20.64	-0.17	-0.417130234	0.081096797	0.16	0.36
CG6779	RpS3	RpS3	RpS3	13	27.23	26.98	27	27.55	27.66	27.72	27.46	27.35	27.63	-0.17	-0.41236089	0.080944912	0.16	0.36
CG5215	Zn72D	Zn72D	Zn72D	9	22.17	22.13	22.22	22.64	22.31	22.62	22.46	22.24	22.42	-0.15	-0.377182389	0.07416513	0.16	0.36
CG8108	CG8108	CG8108	CG8108	2	19.22	19.62	19.57	20.16	20.85	20.3	19.98	20.35	20.35	-0.21	-0.528932271	0.10448939	0.16	0.36
CG11505	Larp4B	Larp4B	Larp4B	7	20.03	20.24	20.21	20.65	20.7	20.65	20.35	20.61	20.53	-0.17	-0.430340551	0.085625472	0.17	0.36
CG42665	Exn	Exn	Exn	1	22.7	22.89	22.8	23.3	23.21	23.22	23.06	23.19	23.02	-0.15	-0.374170191	0.074546253	0.17	0.36
CG6179	CG6179	CG6179	CG6179	1	17.34	16.76	17.47	17.95	17.76	17.83	17.73	17.5	17.53	-0.26	-0.644828096	0.129654508	0.17	0.36
CG6057	SMC1	SMC1	SMC1	3	18.02	17.85	17.63	18.1	18.69	18.41	18.11	18.31	17.98	-0.26	-0.662900699	0.13503547	0.17	0.36
CG5179	Cdk9	Cdk9	Cdk9	7	21.89	21.48	21.66	22.24	22.16	22.27	22	22	22.16	-0.17	-0.423413032	0.086278292	0.17	0.36
CG1559	Upf1	Upf1	Upf1	1	15.16	15.67	15.63	16.71	17.27	16.65	16.44	16.94	16.48	-0.26	-0.645932844	0.131681774	0.17	0.36
CG10110	Cpsf160	Cpsf160	Cpsf160	10	21.84	21.46	21.42	22.22	22.64	22.58	22.4	22.93	22.89	0.26	-0.137661242	0.66181437	0.17	0.37
CG9354	RpL34b	RpL34b	RpL34b	1	17.43	17.27	17.72	18.51	19.31	19.27	18.56	18.02	19.36	-0.38	-0.968200398	0.201418598	0.17	0.37
CG1017	Mfap1	Mfap1	Mfap1	3	20.26	19.91	19.93	20.52	21.11	20.93	20.64	20.55	20.6	-0.26	-0.651024478	0.135515312	0.17	0.37
CG6015	CG6015	CG6015	CG6015	2	18.04	18.19	17.97	18.66	18.95	18.52	18.39	18.47	18.59	-0.23	-0.572946878	0.120550951	0.18	0.37
CG4447	mRRF1	mRRF1	mRRF1	9	24.6	24.49	24.95	25.34	24.83	25.07	25.1	24.79	24.74	-0.21	-0.526783525	0.112352953	0.18	0.37
CG12128	CG12128	CG12128	CG12128	1	16.2	16.42	16.76	17.24	17.03	17.01	16.92	16.79	16.76	-0.27	-0.686210496	0.147452118	0.18	0.38
CG1469	Fer2LCH	Fer2LCH	Fer2LCH	7	23.59	23.5	23.52	24.13	24.27	24.35	24.07	23.99	24.25	-0.15	-0.383896617	0.084063276	0.18	0.38
CG3727	dock	dock	dock	1	17.23	16.75	17.03	17.65	17.55	17.68	17.48	17.48	17.2	-0.24	-0.617394239	0.13571493	0.18	0.38
CG8711	Cul4	Cul4	Cul4	1	17.93	17.53	17.5	18.5	18.86	18.56	18.22	18.23	18.61	-0.28	-0.726281295	0.159723707	0.18	0.38
CG5170	Dp1	Dp1	Dp1	14	22.41	22.01	21.83	22.73	23.02	22.73	22.97	23.25	22.88	0.2	-0.116497846	0.525648067	0.18	0.38
CG8597	lark	lark	lark	8	23.84	23.82	23.68	24.13	24.33	24.29	24.07	24.01	24.21	-0.16	-0.403388402	0.090274787	0.19	0.39
CG4973	mdlc	mdlc	mdlc	5	21.52	21.55	21.5	22.2	22.6	22	21.98	22.09	22.15	-0.19	-0.492660002	0.112867913	0.19	0.39
CG7182	CG7182	CG7182	CG7182	2	19.35	18.75	18.88	19.76	19.89	19.63	20.04	20.12	19.82	0.23	-0.137385475	0.59739556	0.19	0.39
CG1796	Tango4	Tango4	Tango4	3	19.09	19.27	19.3	19.86	20.03	20.38	19.88	19.65	20.13	-0.2	-0.527748412	0.121800417	0.19	0.39
CG17766	Rbcn-3B	Rbcn-3B	Rbcn-3B	2	17.24	16.92	16.75	18.11	17.97	18.05	17.69	17.74	17.98	-0.24	-0.634743498	0.146628378	0.19	0.39
CG2910	nito	nito	nito	19	25.02	24.99	24.87	25.28	25.54	25.37	25.16	25.36	25.24	-0.14	-0.36586615	0.085192697	0.19	0.4
CG4164	shv	shv	shv	3	19.9	19.83	19.95	20.72	20.55	20.68	20.57	20.48	20.4	-0.16	-0.42632852	0.09972414	0.19	0.4
CG43443	hts	hts	hts	4	20.14	20.07	20.31	20.78	20.38	20.51	20.49	20.35	20.28	-0.18	-0.480297845	0.115267435	0.2	0.41
CG7961	alphaCOP	alphaCOP	alphaCOP	22	24.46	24.37	24.19	24.65	24.76	24.72	24.81	24.89	24.86	0.14	-0.090086275	0.375143344	0.2	0.41
CG4033	RpI135	RpI135	RpI135	6	21.67	21.43	21.19	21.91	22.02	21.9	21.79	21.77	21.77	-0.17	-0.439250821	0.106257819	0.2	0.41
CG18005	beag	beag	beag	5	20.87	20.78	20.86	21.3	21.56	21.49	21.32	21.31	21.25	-0.15	-0.406384818	0.098536463	0.2	0.41
CG32344	CG32344	CG32344	CG32344	1	16.86	17.55	17.27	18	18.16	17.78	17.73	17.89	17.61	-0.23	-0.619830635	0.151442312	0.2	0.41
CG12186	ProRS-m	ProRS-m	ProRS-m	1	17.71	18.04	17.94	18.71	18.36	18.13	18.54	18.86	18.55	0.25	-0.164937641	0.669571867	0.21	0.41
CG4291	CG4291	CG4291	CG4291	6	22.65	22.83	22.79	23.23	23.14	23.05	23.4	23.39	23.09	0.15	-0.099911082	0.403958808	0.21	0.41
CG7619	Rpn10	Rpn10	Rpn10	1	19.17	18.84	19.07	19.42	20.01	19.72	19.94	20.2	19.76	0.25	-0.166775727	0.664322376	0.21	0.42
CG11777	CG11777	CG11777	CG11777	4	24.34	24.12	24.25	24.53	24.35	24.39	24.7	24.57	24.4	0.13	-0.090704637	0.359119386	0.21	0.42
CG17168	CG17168	CG17168	CG17168	7	23.91	24.37	24.38	24.78	24.92	24.61	24.63	24.61	24.52	-0.18	-0.480375728	0.124166853	0.22	0.43
CG6501	Ns2	Ns2	Ns2	8	22.63	22.77	22.65	23.17	23.25	23.1	23.2	23.02	22.9	-0.14	-0.369729448	0.095636179	0.22	0.43
CG11254	mael	mael	mael	2	20.17	20.28	20.27	20.75	20.68	20.75	20.53	20.85	20.18	-0.21	-0.55518221	0.143704078	0.22	0.43
CG6755	EloA	EloA	EloA	9	23.07	22.9	22.99	23.2	23.48	23.44	23.23	23.23	23.22	-0.15	-0.394067186	0.10220582	0.22	0.43
CG5242	mRpL40	mRpL40	mRpL40	3	20.68	20.11	20.46	21.28	20.97	21.07	20.92	21.15	20.58	-0.23	-0.611243888	0.159558749	0.22	0.43
CG14235	COX6B	COX6B	COX6B	2	21.55	21.3	21.33	22.12	21.9	22.17	22.11	22.55	22.13	0.2	-0.142288111	0.541269823	0.22	0.43
CG13364	CG13364	CG13364	CG13364	1	21.15	21.28	21.1	21.88	21.9	21.95	21.81	22.5	21.97	0.18	-0.131842409	0.500858546	0.22	0.43
CG12792	l(2)09851	l(2)09851	l(2)09851	1	17.07	16.25	17.04	17.93	17.31	17.54	17.32	17.43	17.18	-0.28	-0.760242183	0.200958065	0.22	0.43
CG8882	eIF3i	eIF3i	eIF3i	9	22.29	22.01	22.17	23.04	22.96	23.11	22.83	23.02	22.81	-0.15	-0.411295549	0.10925919	0.22	0.43
CG8542	Hsc70-5	Hsc70-5	Hsc70-5	2	22.08	22.16	22.14	23.51	23.83	23.84	23.6	23.19	23.81	-0.19	-0.52257059	0.139585634	0.22	0.43
CG42724	CG42724	CG42724	CG42724	17	22.5	22.52	22.78	23.17	23	23.21	23.01	23.05	22.86	-0.15	-0.419914346	0.113371322	0.23	0.44
CG6701	CG6701	CG6701	CG6701	3	18.44	18.72	18.94	19.58	19.82	19.51	19.6	19.18	19.42	-0.24	-0.651801301	0.179301993	0.23	0.44
CG6782	sea	sea	sea	3	19.24	19.11	19.29	19.91	19.42	19.53	19.65	19.37	19.29	-0.18	-0.505038168	0.139950935	0.23	0.45
CG4389	Mtpalpha	Mtpalpha	Mtpalpha	5	21.18	21.06	20.79	21.48	21.15	21.24	21.58	21.67	21.13	0.17	-0.128132114	0.461462139	0.23	0.45
CG9412	rin	rin	rin	6	22.45	22.14	22.37	22.63	22.64	22.7	22.51	22.56	22.5	-0.14	-0.376109321	0.105714916	0.24	0.45
CG3395	RpS9	RpS9	RpS9	13	27.23	27.12	27.19	27.75	27.61	27.81	27.66	27.43	27.74	-0.11	-0.314625096	0.088449145	0.24	0.45
CG4043	Rrp46	Rrp46	Rrp46	4	22.92	22.89	22.52	23.27	23.13	23.37	23.81	23.2	23.33	0.19	-0.148916279	0.529312816	0.24	0.45
CG5994	Nelf-E	Nelf-E	Nelf-E	2	19.12	19.1	19.69	19.82	19.75	19.92	19.86	19.47	19.48	-0.22	-0.624474238	0.175744881	0.24	0.45
CG8396	Ssb-c31a	Ssb-c31a	Ssb-c31a	5	24.92	25.93	25.29	26.25	26.75	25.73	25.78	25.9	26.18	-0.29	-0.798065098	0.224900696	0.24	0.45
CG6493	Dcr-2	Dcr-2	Dcr-2	30	24.95	24.79	24.75	25.6	25.6	25.57	25.5	25.44	25.47	-0.12	-0.327704783	0.093490061	0.24	0.45
CG1455	CanA1	CanA1	CanA1	1	17.86	18.02	17.59	18.27	18.63	18.76	18.23	18.66	18.09	-0.23	-0.640722072	0.182863665	0.24	0.45
CG7872	CG7872	CG7872	CG7872	2	19.39	18.98	18.94	19.62	20.13	20.04	19.59	19.73	19.78	-0.23	-0.651064503	0.188313952	0.25	0.46
CG7556	CG7556	CG7556	CG7556	1	17.01	16.33	16.57	17.44	17.19	17.12	17.2	17.21	16.66	-0.23	-0.6438192	0.187391133	0.25	0.46
CG5393	apt	apt	apt	9	23.11	22.86	22.43	23.28	23.83	23.59	23.47	24.52	23.53	0.27	-0.223513764	0.767590224	0.25	0.46
CG3585	Rbcn-3A	Rbcn-3A	Rbcn-3A	4	19.15	18.79	18.79	19.72	19.89	19.69	19.94	19.95	19.96	0.18	-0.14768034	0.506591003	0.25	0.46
CG2331	TER94	TER94	TER94	12	23.52	23.36	23.17	23.66	23.83	23.84	23.51	23.67	23.69	-0.15	-0.429618469	0.125936902	0.25	0.46
CG8280	eEF1alpha1	eEF1alpha1	eEF1alpha1	15	28.42	28.18	28.29	28.63	28.62	28.62	28.79	28.94	28.55	0.14	-0.113193701	0.385369412	0.25	0.46
CG5317	RpL7-like	RpL7-like	RpL7-like	4	22.84	23.07	23.02	23.21	23.3	23.37	23.17	23.14	23.22	-0.12	-0.338403937	0.099882697	0.25	0.46
CG34412	Tlk	Tlk	Tlk	2	18.04	17.83	18.09	18.53	19.06	18.77	18.66	18.56	18.49	-0.22	-0.61418131	0.182768748	0.25	0.46
CG1249	SmD2	SmD2	SmD2	4	23.91	23.91	24	24.46	23.97	24.32	24.16	24	24.19	-0.14	-0.387701534	0.115830305	0.25	0.47
CG1453	Klp10A	Klp10A	Klp10A	3	20	19.85	19.86	20.33	20.6	20.57	20.46	20.83	20.7	0.16	-0.141623833	0.470552346	0.26	0.47
CG6944	Lam	Lam	Lam	24	25.28	25.34	25.15	25.74	25.78	25.76	25.55	25.64	25.73	-0.12	-0.339533346	0.102634772	0.26	0.47
CG9539	Sec61alpha	Sec61alpha	Sec61alpha	1	19.97	19.76	19.19	19.79	20.36	19.99	20.25	20.22	20.42	0.25	-0.217909438	0.719444056	0.26	0.47
CG1898	HBS1	HBS1	HBS1	3	18.99	18.8	18.67	19.22	19.75	19.59	19.27	19.28	19.4	-0.21	-0.591746738	0.179302554	0.26	0.47
CG6379	CG6379	CG6379	CG6379	3	19.1	19.26	19.24	19.64	19.72	19.41	19.36	19.48	19.43	-0.16	-0.470591797	0.142715508	0.26	0.47
CG7414	CG7414	CG7414	CG7414	5	21.52	21.18	21.27	21.71	21.73	21.74	21.62	21.6	21.56	-0.13	-0.382164852	0.116366854	0.26	0.47
CG4338	CG4338	CG4338	CG4338	1	17.21	18.34	18.11	19.34	19.17	18.16	18.32	18.45	18.69	-0.4	-1.162021488	0.354919387	0.26	0.47
CG5000	msps	msps	msps	4	19.08	19.34	18.88	19.81	19.84	19.88	19.68	19.72	19.63	-0.17	-0.484364165	0.149095046	0.26	0.47
CG9987	RtcB	RtcB	RtcB	6	22.07	21.93	21.83	22.66	22.89	22.83	22.48	22.74	22.74	-0.14	-0.409572626	0.126931147	0.27	0.47
CG6050	mEFTu1	mEFTu1	mEFTu1	2	18.34	18.68	18.14	18.9	18.93	18.79	18.97	19.8	18.56	0.24	-0.216002046	0.693028991	0.27	0.48
CG4169	UQCR-C2	UQCR-C2	UQCR-C2	10	23.21	22.94	22.86	23.5	23.66	23.64	23.51	23.58	23.27	-0.14	-0.416010307	0.130172773	0.27	0.48
CG1913	alphaTub84B	alphaTub84B	alphaTub84B	6	22.38	22.36	22.32	22.87	23.14	22.88	23.03	23.29	22.92	0.12	-0.112814352	0.358359154	0.27	0.48
CG1691	Imp	Imp	Imp	10	21.69	21.92	21.78	22.85	22.96	22.78	22.69	22.6	22.89	-0.14	-0.400159668	0.126375383	0.27	0.48
CG11444	CG11444	CG11444	CG11444	3	22.29	22.92	22.66	23.51	23.49	22.95	22.97	23.31	23.11	-0.19	-0.549082881	0.174047347	0.27	0.48
CG6258	RfC38	RfC38	RfC38	5	20.46	20.83	20.54	21.38	21.39	21.44	21.06	21.49	21.24	-0.14	-0.405429683	0.13005304	0.28	0.49
CG7441	TrpRS-m	TrpRS-m	TrpRS-m	3	19.48	19.34	19.28	19.95	19.9	19.76	19.94	20.46	19.76	0.19	-0.17630511	0.549579514	0.28	0.49
CG18600	CG18600	CG18600	CG18600	5	21.82	21.74	21.56	22.02	22.02	22.21	21.9	22.12	21.81	-0.14	-0.421881004	0.137171299	0.28	0.49
CG8043	CG8043	CG8043	CG8043	4	21.16	20.78	20.93	21.4	21.61	21.38	21.28	21.32	21.35	-0.15	-0.443872754	0.145117774	0.28	0.49
CG15561	CG15561	CG15561	CG15561	12	24.05	23.63	23.77	24.4	24.53	24.51	24.33	24.51	24.14	-0.16	-0.464462845	0.151886074	0.28	0.49
CG10986	g	g	g	7	21.75	21.9	21.88	22.64	22.14	22.1	22.24	22.22	21.94	-0.16	-0.487546741	0.1597787	0.28	0.49
CG6137	aub	aub	aub	1	22.73	23.19	22.93	23.72	23.31	23.29	23.23	23.31	23.26	-0.17	-0.515415338	0.169075589	0.28	0.49
CG7726	RpL11	RpL11	RpL11	2	23.79	23.76	23.55	24.63	24.81	24.92	24.66	24.39	24.83	-0.16	-0.472932022	0.15540479	0.28	0.49
CG4659	Srp54k	Srp54k	Srp54k	1	18.59	18.77	18.13	20.28	19.15	19.06	19.88	20.3	19.21	0.3	-0.292973008	0.886715598	0.29	0.49
CG6322	U4-U6-60K	U4-U6-60K	U4-U6-60K	3	18.62	19.54	19.14	19.73	20.02	20.19	19.83	19.57	19.85	-0.23	-0.686745532	0.226977615	0.29	0.49
CG6370	OstDelta	OstDelta	OstDelta	2	19.25	18.85	18.37	19.35	19.93	19.63	19.61	20.25	19.83	0.26	-0.255371325	0.772019852	0.29	0.49
CG8203	Cdk5	Cdk5	Cdk5	1	19.42	18.75	18.85	19.58	19.94	19.98	19.72	20.31	20.26	0.26	-0.259117339	0.783131097	0.29	0.49
CG11710	CG11710	CG11710	CG11710	2	18.89	18.67	18.91	19.43	19.5	19.38	19.06	19.42	19.31	-0.17	-0.514693628	0.170777765	0.29	0.49
CG31671	tho2	tho2	tho2	5	19.74	19.86	19.84	20.33	20.96	20.76	20.45	20.65	20.49	-0.15	-0.460542773	0.152898079	0.29	0.49
CG6195	CG6195	CG6195	CG6195	1	17.06	17.07	16.93	17.24	17.68	17.11	17.38	17.86	17.33	0.18	-0.179855288	0.5404958	0.29	0.49
CG1789	CG1789	CG1789	CG1789	6	23.87	24.28	24.3	24.65	24.42	24.61	24.49	24.3	24.44	-0.15	-0.454781758	0.151395313	0.29	0.49
CG12752	Nxt1	Nxt1	Nxt1	1	20.85	21.29	21.32	22.45	23.75	22.91	22.75	23.77	23.15	0.18	-0.184615621	0.55404662	0.29	0.49
CG15715	CG15715	CG15715	CG15715	2	21.57	21.26	21.63	22.04	21.99	22.17	22.19	22.28	22.13	0.13	-0.135592609	0.405305085	0.29	0.49
CG4884	CG4884	CG4884	CG4884	5	22.61	22.4	22.67	23.04	23.01	22.92	22.98	22.87	22.77	-0.12	-0.365684144	0.123449855	0.29	0.49
CG11660	RIOK1	RIOK1	RIOK1	6	22.05	21.28	21.78	22.14	22.1	22.41	22.16	22.12	21.79	-0.2	-0.59786269	0.20242102	0.29	0.49
CG33303	CG33303	CG33303	CG33303	3	20.02	19.76	19.55	20.08	20.52	20.4	20.28	20.71	20.6	0.19	-0.200003222	0.586143154	0.3	0.5
CG6833	CG6833	CG6833	CG6833	4	21.75	21.39	21.69	21.9	22.05	22.19	21.9	21.81	22.03	-0.13	-0.391642091	0.133803634	0.3	0.5
CG1745	HP5	HP5	HP5	1	14.71	15.37	14.9	15.28	15.98	15.22	15.53	16.05	15.44	0.18	-0.189406887	0.551013239	0.3	0.5
CG6597	SCCRO4	SCCRO4	SCCRO4	1	14.71	15.37	14.9	15.28	15.98	15.22	15.53	16.05	15.44	0.18	-0.189406887	0.551013239	0.3	0.5
CG16973	msn	msn	msn	5	19.91	19.58	19.55	20.13	20.3	20.22	20.17	20.52	20.48	0.17	-0.180138127	0.522911674	0.3	0.5
CG6699	beta'COP	beta'COP	beta'COP	9	22.48	22.26	21.97	22.77	22.97	22.66	22.82	23.05	22.95	0.14	-0.150806848	0.43454105	0.3	0.5
CG7106	lectin-28C	lectin-28C	lectin-28C	1	18.02	17.94	18.13	18.55	18.94	18.92	18.46	18.79	18.66	-0.17	-0.506969973	0.17621696	0.3	0.5
CG1410	waw	waw	waw	4	20.48	20.71	20.88	21.13	21.2	21.1	20.98	21.09	20.96	-0.13	-0.407033934	0.142547907	0.31	0.51
CG7014	RpS5b	RpS5b	RpS5b	1	21.93	21.58	21.52	22.66	23.07	22.93	22.73	22.52	22.89	-0.17	-0.535728599	0.187973547	0.31	0.51
CG7752	pzg	pzg	pzg	6	22.39	22.4	22.43	22.82	22.81	23.06	22.81	22.71	22.85	-0.1	-0.324619539	0.115881384	0.31	0.51
CG5838	Dref	Dref	Dref	5	21.58	21.53	21.47	22.25	22.12	22.03	22.12	22.12	21.84	-0.11	-0.331797797	0.11848041	0.31	0.51
CG9802	SMC3	SMC3	SMC3	1	17.77	17.17	17.12	17.9	18.03	18.08	18.34	17.78	18.61	0.24	-0.266000331	0.744856017	0.31	0.51
CG12225	Spt6	Spt6	Spt6	22	23.59	23.58	23.35	23.9	24.31	24.13	23.8	24.07	24.08	-0.13	-0.404874775	0.145232636	0.32	0.51
CG2186	CG2186	CG2186	CG2186	6	20.54	20.64	20.62	21.12	21.22	21.07	21.03	21.12	20.93	-0.11	-0.35102546	0.126202529	0.32	0.51
CG14781	mei-38	mei-38	mei-38	1	18.01	17.47	17.28	18.34	17.96	18.14	18.38	18.68	18.01	0.21	-0.240235884	0.660641997	0.32	0.52
CG33122	cutlet	cutlet	cutlet	1	18.18	18.79	17.98	18.93	19.65	19.35	19.37	19.57	19.56	0.19	-0.217996197	0.597059875	0.32	0.52
CG3542	CG3542	CG3542	CG3542	10	22.8	22.71	22.74	23.19	23.43	23.28	23.1	23.36	23.12	-0.11	-0.347156424	0.127773385	0.32	0.53
CG1244	MEP-1	MEP-1	MEP-1	5	20.97	21.16	20.73	21.4	21.65	21.62	21.2	21.64	21.43	-0.13	-0.412176151	0.153846909	0.33	0.53
CG15081	Phb2	Phb2	Phb2	4	22.03	22.06	22.09	22.34	22.31	22.36	22.27	22.28	22.16	-0.1	-0.316202624	0.118190008	0.33	0.53
CG32438	SMC5	SMC5	SMC5	2	18.92	18.53	18.5	19.36	19.74	19.46	19.1	19.48	19.41	-0.19	-0.597628737	0.223837332	0.33	0.53
CG7808	RpS8	RpS8	RpS8	7	25.24	24.85	24.89	25.87	26.19	26.13	25.91	25.8	26.05	-0.14	-0.458504344	0.173971381	0.34	0.54
CG4611	CG4611	CG4611	CG4611	4	20.11	19.83	19.99	20.7	20.42	20.15	20.35	20.32	20.19	-0.14	-0.445763533	0.169452106	0.34	0.54
CG4887	CG4887	CG4887	CG4887	19	24.87	24.89	24.78	25.12	25.35	25.34	25.06	25.35	25.08	-0.1	-0.339484819	0.129671742	0.34	0.54
CG4118	nxf2	nxf2	nxf2	9	22.35	22.8	21.67	24.44	25.74	25.13	24.76	25.81	25.46	0.23	-0.290025812	0.758774067	0.34	0.54
CG5899	Etl1	Etl1	Etl1	2	19.28	19.12	19.07	19.56	19.84	19.47	19.46	19.39	19.57	-0.15	-0.491824299	0.18961308	0.34	0.55
CG33129	CG33129	CG33129	CG33129	3	19.95	19.72	19.94	20.31	20.79	20.89	20.5	20.36	20.68	-0.16	-0.505945714	0.19566864	0.34	0.55
CG10159	BEAF-32	BEAF-32	BEAF-32	1	19.23	19.79	19.7	20.28	20.05	20	19.86	20.24	19.69	-0.18	-0.59587538	0.23087784	0.35	0.55
CG9075	eIF4A	eIF4A	eIF4A	13	23.71	23.85	23.43	24.13	24.16	24.18	24.22	24.38	24.2	0.11	-0.137410725	0.353330128	0.35	0.55
CG9277	betaTub56D	betaTub56D	betaTub56D	6	22.26	21.89	21.85	22.47	22.66	22.64	22.72	22.92	22.55	0.14	-0.174280052	0.447942151	0.35	0.55
CG9543	epsilonCOP	epsilonCOP	epsilonCOP	3	21.11	20.93	20.73	21.48	21.73	21.39	21.64	21.63	21.72	0.13	-0.161263585	0.414258961	0.35	0.55
CG5809	CaBP1	CaBP1	CaBP1	4	20.87	20.57	19.98	20.68	21.36	21.22	20.95	21.91	21.14	0.24	-0.314846336	0.804831457	0.35	0.55
CG4046	RpS16	RpS16	RpS16	10	25.9	25.54	25.58	26.46	26.53	26.7	26.4	26.28	26.64	-0.12	-0.404534165	0.158277464	0.35	0.55
CG10944	RpS6	RpS6	RpS6	4	23.87	23.8	23.69	24.83	25.17	25.21	24.95	24.79	25.09	-0.13	-0.424750384	0.166200604	0.35	0.55
CG5205	obe	obe	obe	3	19.41	19.2	18.83	19.74	20.02	19.92	19.68	19.71	19.79	-0.16	-0.541983899	0.213564287	0.35	0.55
CG9677	eIF3e	eIF3e	eIF3e	5	20.76	20.48	20.26	21.27	21.2	21.14	21.04	21.02	21.16	-0.13	-0.424457311	0.167714115	0.35	0.55
CG18076	shot	shot	shot	6	20.49	20.41	20.68	21.2	21.01	20.95	20.94	20.98	20.88	-0.12	-0.403088741	0.159509298	0.35	0.55
CG5505	scny	scny	scny	8	21.47	21.52	21.3	21.7	22.13	22.13	21.74	21.92	21.95	-0.12	-0.40749326	0.161886567	0.36	0.55
CG9601	CG9601	CG9601	CG9601	3	19.98	19.94	20.02	20.52	20.57	20.63	20.3	20.5	20.58	-0.11	-0.378474692	0.150620037	0.36	0.55
CG32491	mod(mdg4)	mod(mdg4)	mod(mdg4)	2	19.54	19.61	19.24	19.81	20.51	20.22	20.2	20.66	20.14	0.15	-0.202684219	0.508544261	0.36	0.55
CG34261	CG34261	CG34261	CG34261	2	19.02	18.99	18.64	19.75	19.29	19.79	19.75	19.83	19.76	0.17	-0.224819986	0.562340466	0.36	0.55
CG9684	CG9684	CG9684	CG9684	1	17.18	17.21	17.34	18.09	18.67	18.54	18.06	18.37	18.42	-0.15	-0.499359124	0.199892373	0.36	0.55
CG5796	Ppox	Ppox	Ppox	1	16.8	16.9	17.35	18.5	17.56	17.59	17.83	17.43	17.68	-0.23	-0.785869689	0.316647874	0.36	0.55
CG3661	RpL23	RpL23	RpL23	6	28	27.89	28.05	28.41	28.04	28.28	28.26	27.96	28.25	-0.09	-0.291472549	0.118496577	0.37	0.56
CG9769	eIF3f1	eIF3f1	eIF3f1	4	20.85	20.8	20.44	21.67	21.68	21.77	21.61	21.55	21.6	-0.12	-0.401769288	0.164288866	0.37	0.56
CG13425	HnRNP-K	HnRNP-K	HnRNP-K	9	26.09	25.99	26.12	26.41	26.24	26.51	26.44	26.37	26.59	0.08	-0.115186115	0.281613451	0.37	0.56
CG15693	RpS20	RpS20	RpS20	4	26.55	26.56	26.22	26.97	27.18	27.14	27.03	27.38	27.22	0.11	-0.15321502	0.373532328	0.37	0.56
CG14998	ens	ens	ens	3	21.61	21.77	21.44	22	22.15	22.33	22.1	22.22	22.56	0.13	-0.1853839	0.450626976	0.37	0.56
CG8142	CG8142	CG8142	CG8142	4	20.98	20.74	20.69	21.5	21.74	21.7	21.54	21.55	21.5	-0.11	-0.391121253	0.161147863	0.37	0.56
CG2118	Mccc1	Mccc1	Mccc1	2	18.84	18.29	18.59	19.28	18.95	19.09	19.24	19.28	19.22	0.14	-0.200411074	0.486412644	0.37	0.56
CG8478	CG8478	CG8478	CG8478	6	20.51	20.72	20.68	21.17	21.12	21.09	20.95	21.1	21.03	-0.1	-0.349164732	0.145945761	0.38	0.57
CG5886	CG5886	CG5886	CG5886	1	17.17	16.91	16.53	17.48	17.7	17.47	17.31	17.15	17.62	-0.19	-0.658672656	0.278534561	0.38	0.58
CG15442	RpL27A	RpL27A	RpL27A	2	22.7	22.76	22.82	23.97	24.3	24.55	24.14	23.85	24.45	-0.13	-0.435861059	0.184724074	0.39	0.58
CG2621	sgg	sgg	sgg	4	20.03	20.26	20.01	20.75	20.58	20.47	20.48	20.63	20.34	-0.11	-0.394680883	0.16732929	0.39	0.58
CG12165	Incenp	Incenp	Incenp	2	18.73	18.42	18.6	19.22	19.35	19.48	18.98	19.35	19.29	-0.15	-0.507864905	0.215704663	0.39	0.58
CG11856	Nup358	Nup358	Nup358	1	18.58	19.17	18.92	19.34	19.28	19.56	19.65	19.94	19.17	0.19	-0.280662766	0.654736939	0.39	0.58
CG12264	Nfs1	Nfs1	Nfs1	5	21.67	21.48	21.24	21.73	22.22	21.93	21.88	21.9	21.72	-0.13	-0.438669	0.188063044	0.39	0.58
CG3548	CG3548	CG3548	CG3548	1	15.98	15.76	16.51	17.47	17.44	17.67	17.26	17.46	17.36	-0.16	-0.576426794	0.24813154	0.39	0.58
CG1444	spidey	spidey	spidey	4	21.8	21.94	21.84	22.27	22.38	22.23	22.28	22.18	22.16	-0.09	-0.313354503	0.135041865	0.39	0.58
CG7583	CtBP	CtBP	CtBP	6	21.94	21.94	21.74	22.5	22.59	22.49	22.18	22.7	22.38	-0.11	-0.378337168	0.164404054	0.4	0.59
CG6455	Mitofilin	Mitofilin	Mitofilin	5	19.87	19.9	19.54	20.77	21.32	20.82	20.99	21.12	21.21	0.14	-0.209477918	0.480039518	0.4	0.59
CG4119	CG4119	CG4119	CG4119	15	23.39	23.3	23.24	24.32	25.04	24.47	24.24	24.89	24.3	-0.13	-0.47477191	0.208418444	0.4	0.59
CG8507	CG8507	CG8507	CG8507	10	24.88	24.44	24.85	25.07	24.86	25.03	25.16	25.09	25	0.1	-0.157145605	0.356219032	0.4	0.59
CG17255	nocte	nocte	nocte	4	19.21	19.33	19.14	19.75	19.95	19.77	19.83	20.01	19.95	0.11	-0.170927978	0.384677502	0.41	0.6
CG13900	Sf3b3	Sf3b3	Sf3b3	3	19.85	20.22	19.95	20.38	20.96	20.68	20.44	20.69	20.58	-0.1	-0.37226815	0.167788398	0.42	0.61
CG11271	RpS12	RpS12	RpS12	1	23.59	23.25	22.94	23.69	23.8	23.78	23.96	23.96	23.7	0.11	-0.190969684	0.420707264	0.42	0.61
CG1528	gammaCOP	gammaCOP	gammaCOP	9	22.65	22.54	22.4	23.16	23.4	23.05	23.21	23.33	23.37	0.1	-0.163590983	0.358922322	0.42	0.61
CG18124	mTTF	mTTF	mTTF	1	16.88	15.88	16.76	17.63	17.56	16.95	17.05	16.68	17.66	-0.25	-0.919622937	0.420107018	0.42	0.61
CG10712	Chro	Chro	Chro	2	19.01	18.93	18.87	19.53	19.78	19.79	19.5	19.39	19.83	-0.13	-0.478160875	0.219491328	0.43	0.62
CG14792	sta	sta	sta	7	23	22.74	22.71	23.61	23.83	23.61	23.57	23.45	23.71	-0.11	-0.388852036	0.178840136	0.43	0.62
CG17611	eIF6	eIF6	eIF6	6	23.56	23.57	23.25	24.02	24.07	23.73	24.01	23.64	23.86	-0.1	-0.386133322	0.179525316	0.43	0.62
CG1577	mRpL52	mRpL52	mRpL52	1	18.93	18.62	19.23	20.03	19.4	19.24	19.36	19.32	19.48	-0.17	-0.638826862	0.297657076	0.43	0.62
CG5064	Srp68	Srp68	Srp68	3	19.73	19.73	19.73	20.06	20.19	20.14	20.18	20.26	20.23	0.09	-0.16776491	0.357195215	0.44	0.63
CG33546	gfzf	gfzf	gfzf	1	17.25	17.65	17.73	18.47	18.34	18.78	18.42	19.04	18.59	0.15	-0.273031451	0.578835418	0.44	0.63
CG5920	RpS2	RpS2	RpS2	9	26	26.07	25.99	26.66	26.68	26.65	26.63	26.58	26.58	-0.07	-0.264211909	0.125409834	0.44	0.63
CG9900	Zw10	Zw10	Zw10	4	19.57	19.4	19.19	20.13	20.41	20.18	20.08	20.73	20.3	0.13	-0.235100267	0.494367138	0.44	0.63
CG10840	eIF5B	eIF5B	eIF5B	15	23.76	23.3	23.63	24.04	23.74	24.08	23.96	23.76	23.91	-0.08	-0.30287303	0.144114058	0.44	0.63
CG10470	CG10470	CG10470	CG10470	1	18.92	18.55	18.79	19.47	19.76	19.72	19.66	19.3	19.61	-0.13	-0.489837185	0.233245007	0.44	0.63
CG7185	CG7185	CG7185	CG7185	10	24.86	24.41	24.81	25.12	24.69	25.02	25.2	24.96	24.92	0.09	-0.162101172	0.334449443	0.45	0.65
CG7269	Hel25E	Hel25E	Hel25E	8	22.79	22.88	22.74	23.3	23.38	23.27	23.14	23.51	23.06	-0.08	-0.319988553	0.155541544	0.46	0.65
CG1527	RpS14b	RpS14b	RpS14b	10	27.92	27.81	28.15	28.42	28.04	28.46	28.3	28.09	28.32	-0.07	-0.280798285	0.136785228	0.46	0.65
CG4916	me31B	me31B	me31B	8	23.17	23.11	22.99	23.74	23.9	23.66	23.74	23.95	23.84	0.08	-0.151238971	0.30858075	0.46	0.65
CG6227	CG6227	CG6227	CG6227	8	22.42	22.26	22.37	22.61	22.63	22.62	22.51	22.53	22.6	-0.07	-0.289944572	0.143048578	0.46	0.65
CG5166	Atx2	Atx2	Atx2	4	18.54	18.72	18.19	19.23	19.36	19.23	19.12	19.24	19.13	-0.11	-0.439960268	0.218434621	0.47	0.66
CG6801	vers	vers	vers	1	18.28	17.99	17.94	18.52	18.73	18.78	18.49	18.41	18.74	-0.13	-0.507637401	0.252168409	0.47	0.66
CG1316	CG1316	CG1316	CG1316	6	22.13	22.13	22.02	22.69	22.68	22.53	22.55	22.56	22.58	-0.07	-0.287947173	0.144656275	0.47	0.66
CG9946	eIF2alpha	eIF2alpha	eIF2alpha	8	22.95	22.67	22.71	23.14	23.09	23.25	23.27	23.33	23.12	0.08	-0.170522809	0.338382539	0.48	0.67
CG9805	eIF3a	eIF3a	eIF3a	17	23.6	23.68	23.22	24.06	24.36	24.16	24.13	24.2	24	-0.08	-0.339362923	0.172038223	0.48	0.67
CG5524	jnj	jnj	jnj	1	17.16	16.47	16.14	17.46	17.84	17.26	17.29	18.13	17.74	0.2	-0.417770538	0.816268968	0.49	0.68
CG7507	Dhc64C	Dhc64C	Dhc64C	1	16	16.48	15.97	16.53	16.8	16.62	16.08	16.85	16.64	-0.13	-0.521686355	0.267701321	0.49	0.68
CG11120	Mink	Mink	Mink	2	17.48	17.01	17.54	17.97	18.13	18.04	17.69	18.09	17.96	-0.14	-0.561086377	0.289363083	0.49	0.68
CG5175	kuk	kuk	kuk	3	20.26	20.56	20.33	20.92	20.78	20.66	20.81	20.69	20.59	-0.09	-0.375626197	0.194004955	0.49	0.68
CG7626	Spt5	Spt5	Spt5	4	20.84	20.94	20.58	21.46	21.84	21.7	21.29	21.44	21.91	-0.12	-0.501132842	0.259241562	0.49	0.68
CG14648	lost	lost	lost	9	22.67	22.55	22.71	22.98	23.09	23.24	23.16	23.37	23.05	0.09	-0.186975027	0.361123864	0.49	0.68
CG3265	Eb1	Eb1	Eb1	7	22.09	21.97	21.72	22.65	22.69	22.61	22.55	22.93	22.74	0.09	-0.192375127	0.371244596	0.49	0.68
CG11375	polybromo	polybromo	polybromo	1	17.71	17.52	17.05	18.08	18.09	17.88	17.93	17.83	17.93	-0.12	-0.498695681	0.260170139	0.5	0.68
CG4147	Hsc70-3	Hsc70-3	Hsc70-3	6	21.39	21.22	21.13	21.7	22.16	21.79	21.96	22.07	21.88	0.09	-0.195613347	0.372668022	0.5	0.69
CG1994	l(1)G0020	l(1)G0020	l(1)G0020	22	24.88	24.57	24.29	24.96	25.64	25.36	24.95	25.27	25.33	-0.13	-0.567018269	0.298923963	0.5	0.69
CG7831	ncd	ncd	ncd	5	20.74	20.31	20.33	20.82	21.47	21.44	21.01	21	21.32	-0.14	-0.58322041	0.308774235	0.51	0.69
CG17141	CG17141	CG17141	CG17141	1	18.34	18.99	18.27	19.13	19.59	19.18	19.08	19.39	19.13	-0.1	-0.424393384	0.224781318	0.51	0.69
CG8427	SmD3	SmD3	SmD3	2	24.46	24.08	24.36	24.78	24.79	24.97	25.04	24.99	24.78	0.09	-0.196076513	0.369328924	0.51	0.69
CG10722	nesd	nesd	nesd	4	20.1	20.06	19.75	20.43	20.99	20.96	20.51	20.9	20.63	-0.11	-0.480981043	0.256112922	0.51	0.69
CG3731	UQCR-C1	UQCR-C1	UQCR-C1	2	19.1	19.58	19.42	20.31	19.82	19.83	20.14	20.44	19.79	0.14	-0.318085283	0.593482742	0.51	0.7
CG12220	mRpL32	mRpL32	mRpL32	1	18.79	18.54	18.24	18.91	19.21	19.06	19.4	19.56	18.63	0.13	-0.3142501	0.582953704	0.52	0.7
CG3707	wapl	wapl	wapl	1	18.81	17.98	21.04	22.73	22.55	22.72	22.63	22.06	22.06	-0.41	-1.950811531	1.122143983	0.53	0.71
CG8625	Iswi	Iswi	Iswi	10	22.06	21.97	22.04	22.45	22.88	22.88	22.62	22.69	22.66	-0.08	-0.351125152	0.190273463	0.52	0.7
CG4747	Ndf	Ndf	Ndf	16	24.94	24.92	24.75	25.4	25.49	25.41	25.4	25.61	25.48	0.07	-0.155286919	0.286243506	0.52	0.7
CG5371	RnrL	RnrL	RnrL	5	21.72	21.96	21.64	22.14	22.41	22.42	22.27	22.34	22.13	-0.08	-0.332585001	0.181017536	0.52	0.7
CG9128	Sac1	Sac1	Sac1	2	18.71	18.29	18.44	18.81	19.5	19.59	19.34	19.53	19.45	0.14	-0.336626035	0.617780668	0.52	0.7
CG33714	SLIRP1	SLIRP1	SLIRP1	1	20.41	20.13	19.81	20.85	20.81	20.7	20.72	21.04	20.9	0.1	-0.247959003	0.448798186	0.53	0.71
CG2986	RpS21	RpS21	RpS21	1	21.25	21.18	20.65	21.64	21.92	21.81	21.7	21.96	22.03	0.11	-0.266163295	0.480934643	0.53	0.71
CG8013	Su(z)12	Su(z)12	Su(z)12	1	16.44	16.92	16.86	17.56	18.21	17.63	17.35	18.2	17.54	-0.11	-0.480124018	0.266016622	0.53	0.71
CG5942	brm	brm	brm	2	16.98	16.82	16.28	17.47	18.08	17.94	17.37	17.93	17.75	-0.15	-0.655026857	0.363082452	0.53	0.71
CG10754	Sf3a2	Sf3a2	Sf3a2	2	19.29	19.56	19.21	20.08	20.41	19.94	19.98	20.32	19.91	-0.08	-0.343518063	0.192184653	0.54	0.72
CG10122	RpI1	RpI1	RpI1	20	23.24	23.11	22.82	23.4	23.65	23.56	23.39	23.51	23.48	-0.08	-0.363263375	0.203550201	0.54	0.72
CG7845	l(2)k09848	l(2)k09848	l(2)k09848	3	19.8	19.88	19.91	20.68	20.66	20.65	20.53	20.67	20.57	-0.07	-0.328480655	0.185323709	0.55	0.72
CG7928	ZIPIC	ZIPIC	ZIPIC	7	23.62	23.81	23.53	24.37	24.57	24.18	24.36	24.77	24.18	0.06	-0.164473232	0.289973572	0.55	0.73
CG16944	sesB	sesB	sesB	14	25.42	25.31	25.26	25.65	25.87	25.73	25.67	25.82	25.57	-0.06	-0.291811628	0.167157905	0.56	0.73
CG10880	CG10880	CG10880	CG10880	1	19.96	19.65	19.29	20.19	20.44	20.41	20.14	20.24	20.34	-0.11	-0.514043196	0.296680372	0.56	0.74
CG3320	Rab1	Rab1	Rab1	1	14.74	14.92	14.55	15.22	15.39	15.18	15.13	15.36	15.65	0.12	-0.318181988	0.551200721	0.56	0.74
CG31739	AspRS-m	AspRS-m	AspRS-m	11	22.83	22.76	22.61	23.16	23.51	23.39	23.25	23.38	23.67	0.08	-0.223726417	0.384672922	0.57	0.74
CG1420	Slu7	Slu7	Slu7	20	25.48	25.46	25.56	26.05	25.86	25.99	26.06	26.1	25.92	0.06	-0.167287468	0.28670679	0.57	0.74
CG6512	CG6512	CG6512	CG6512	3	18.62	18.61	18.81	19.28	19.32	19.27	19.2	19.1	19.33	-0.08	-0.383821893	0.224396147	0.57	0.74
CG5903	CG5903	CG5903	CG5903	1	18.06	18.67	18.68	19.39	19.47	19.12	19.57	19.47	19.28	0.11	-0.320255043	0.54769172	0.57	0.74
CG11180	CG11180	CG11180	CG11180	1	16.78	16.75	16.38	17.1	17.03	16.95	17.3	17.24	16.81	0.09	-0.255176572	0.436255423	0.57	0.74
CG42632	mRpL37	mRpL37	mRpL37	4	20.51	20.31	20.38	20.74	20.68	20.65	20.89	20.73	20.65	0.07	-0.184522946	0.31505307	0.57	0.74
CG10306	eIF3k	eIF3k	eIF3k	5	23.04	23.02	23.26	23.53	23.88	24.06	24.16	23.45	23.51	-0.12	-0.563984259	0.330731394	0.57	0.74
CG10034	tj	tj	tj	1	13.29	13.63	13.93	14.84	15.06	14.48	14.01	15.02	14.9	-0.15	-0.729038821	0.427782227	0.57	0.74
CG9320	Ns4	Ns4	Ns4	2	18.79	18.74	18.8	19.42	19.23	19.25	19.29	19.19	19.19	-0.08	-0.370026069	0.21814584	0.58	0.74
CG6141	RpL9	RpL9	RpL9	9	25.52	25.56	25.41	26.04	26.01	26.1	25.99	25.78	26.18	-0.06	-0.319681633	0.191178977	0.58	0.75
CG3845	NAT1	NAT1	NAT1	5	19.18	19.17	19.11	19.64	19.75	19.6	19.67	19.82	19.7	0.07	-0.211770022	0.349688476	0.59	0.76
CG31196	14-3-3epsilon	14-3-3epsilon	14-3-3epsilon	3	21.07	20.49	20.86	21.4	21.73	21.59	21.3	21.67	21.45	-0.1	-0.491757624	0.297993181	0.59	0.76
CG3249	spoon	spoon	spoon	1	17.47	16.87	17.11	18.06	18.76	18.43	18.04	18.32	18.51	-0.13	-0.649304018	0.394904819	0.6	0.76
CG1987	Rbp1-like	Rbp1-like	Rbp1-like	1	24.61	25.21	24.85	25.26	25.33	25.08	25.32	25.56	25	0.07	-0.21876716	0.359634607	0.6	0.76
CG8479	Opa1	Opa1	Opa1	10	21.87	21.89	21.88	22.56	22.44	22.25	22.38	22.23	22.46	-0.06	-0.321309049	0.195831671	0.6	0.76
CG4548	XNP	XNP	XNP	4	19.24	19.23	19.27	19.92	19.86	19.63	19.79	19.93	19.9	0.07	-0.230613495	0.374943269	0.6	0.77
CG17498	mad2	mad2	mad2	1	17.72	17.32	17.52	18.15	18.55	18.15	17.97	18.31	18.28	-0.1	-0.525059735	0.324169724	0.61	0.77
CG9191	Klp61F	Klp61F	Klp61F	8	21.06	20.61	20.29	21.3	22.17	22.09	21.78	22.11	22.06	0.13	-0.426677431	0.689119035	0.61	0.77
CG8987	tam	tam	tam	1	16.05	15.85	16.2	16.67	16.48	16.44	16.39	16.49	16.46	-0.09	-0.458942336	0.286243995	0.61	0.78
CG1149	MstProx	MstProx	MstProx	1	19.04	18.95	19	19.8	19.64	20.2	19.85	19.95	19.56	-0.09	-0.496149025	0.31180289	0.62	0.78
CG17952	LBR	LBR	LBR	7	22.13	21.85	22.11	22.64	22.67	22.77	22.59	22.68	22.65	-0.05	-0.294180985	0.185045817	0.62	0.78
CG8798	Lon	Lon	Lon	1	17.21	16.95	16.61	17.89	18.37	17.96	17.89	18.07	17.98	-0.09	-0.511641332	0.322405321	0.62	0.78
CG31155	Rpb7	Rpb7	Rpb7	1	18.62	18.57	18.08	18.97	19.22	19.31	19.18	19.35	19.24	0.09	-0.309731711	0.490455305	0.62	0.78
CG9748	bel	bel	bel	24	26.56	26.32	26.7	27	26.66	26.86	26.92	26.72	26.72	-0.05	-0.285249092	0.181101986	0.63	0.79
CG10565	CG10565	CG10565	CG10565	9	22.11	22.02	22.07	22.44	22.57	22.41	22.61	22.59	22.38	0.05	-0.179304647	0.280913289	0.63	0.79
CG11279	CG11279	CG11279	CG11279	2	21.38	21.62	21.47	22.55	22.06	21.78	22.19	22.14	21.84	-0.08	-0.428373464	0.275039165	0.64	0.8
CG11979	Rpb5	Rpb5	Rpb5	3	21.52	21.19	20.92	21.51	21.83	21.75	21.5	21.82	21.55	-0.08	-0.437548359	0.28334696	0.64	0.8
CG5650	Pp1-87B	Pp1-87B	Pp1-87B	2	20.72	20.63	20.72	21.13	21.24	21.41	21.19	21.15	21.28	-0.05	-0.294744317	0.190906272	0.64	0.8
CG6711	Taf2	Taf2	Taf2	16	23.42	23.3	23.02	23.89	23.86	23.94	23.8	23.92	23.8	-0.06	-0.316520497	0.205599388	0.64	0.8
CG5746	CG5746	CG5746	CG5746	4	28.9	25.68	25.69	29.51	26.21	26	29.34	26.23	26.02	-0.05	-0.262672036	0.170946559	0.65	0.8
CG4620	unk	unk	unk	1	16.95	17.38	17.44	18	17.74	17.73	17.76	18.24	17.75	0.09	-0.350557521	0.53474439	0.65	0.81
CG14104	CG14104	CG14104	CG14104	1	17.98	17.88	18.12	18.47	18.51	18.56	18.53	18.35	18.47	-0.07	-0.380649229	0.249590568	0.65	0.81
CG2261	CstF50	CstF50	CstF50	2	20.32	20.25	20.56	20.94	20.86	21.06	20.65	21.08	20.94	-0.06	-0.364830948	0.239460495	0.65	0.81
CG3180	RpII140	RpII140	RpII140	11	22.19	21.98	21.84	22.28	22.65	22.66	22.44	22.79	22.56	0.07	-0.256074969	0.386436038	0.66	0.81
CG42551	larp	larp	larp	6	20.83	20.83	20.78	21.19	21.66	21.3	21.41	21.51	21.39	0.05	-0.213627465	0.322208782	0.66	0.81
CG33807	His1:CG33807	His1:CG33807	His1:CG33807	4	24.97	25.54	25.66	26.2	26.01	26.07	26.09	25.6	26.92	0.11	-0.434656132	0.653450408	0.66	0.81
CG2216	Fer1HCH	Fer1HCH	Fer1HCH	4	21.2	19.98	19.82	20.8	22.04	21.91	21.13	21.9	22.46	0.24	-1.117909068	1.607791616	0.68	0.82
CG9742	SNRPG	SNRPG	SNRPG	2	22.41	22.42	22.56	22.86	22.79	22.91	22.98	22.88	22.84	0.04	-0.178894216	0.267875829	0.66	0.82
CG6143	Pep	Pep	Pep	11	23.07	23.23	23.54	23.62	23.41	23.84	23.76	23.51	23.76	0.05	-0.210741119	0.314071257	0.67	0.82
CG1569	rod	rod	rod	6	20.88	20.37	20.07	20.9	21.64	21.58	21.12	22.01	21.35	0.12	-0.480826775	0.714904117	0.67	0.82
CG5014	Vap33	Vap33	Vap33	4	23.35	23.09	22.74	23.53	24.08	23.86	23.91	24.01	23.76	0.07	-0.29578529	0.438934219	0.67	0.82
CG2072	Mad1	Mad1	Mad1	2	18.21	18.25	17.92	18.86	19.11	18.92	18.88	18.94	18.88	-0.06	-0.386670167	0.260591123	0.67	0.82
CG8309	eIF3m	eIF3m	eIF3m	4	20.32	20.28	20.05	20.94	21.08	20.72	20.9	21.01	20.69	-0.05	-0.295090228	0.199148619	0.67	0.82
CG9423	Kap-alpha3	Kap-alpha3	Kap-alpha3	3	19.49	19.28	18.98	19.6	19.88	20.07	19.54	20.05	19.7	-0.08	-0.52061182	0.351372178	0.67	0.82
CG5119	pAbp	pAbp	pAbp	10	23.1	22.87	22.65	23.53	23.98	23.86	23.64	23.71	23.81	-0.07	-0.407700027	0.275363579	0.67	0.82
CG12129	CG12129	CG12129	CG12129	1	17.53	18	17.94	18.28	18.54	18.28	18.29	18.64	17.94	-0.08	-0.473472374	0.320064268	0.67	0.82
CG11943	Nup205	Nup205	Nup205	1	19.42	19.62	19.42	19.97	19.98	20.33	20.08	19.78	20.23	-0.07	-0.416907785	0.284166314	0.68	0.82
CG9797	M1BP	M1BP	M1BP	3	20.36	20.28	20.08	20.57	20.86	20.72	20.74	21	20.58	0.06	-0.236990982	0.347029833	0.68	0.82
CG17252	BCL7-like	BCL7-like	BCL7-like	1	16.93	17.06	16.78	17.42	17.55	17.83	17.35	17.64	17.6	-0.07	-0.442987993	0.30531196	0.69	0.83
CG2807	Sf3b1	Sf3b1	Sf3b1	6	20.15	19.82	19.7	22.47	22.53	22.82	22.74	22.44	22.46	-0.06	-0.393274684	0.271837493	0.69	0.83
CG18428	CG18428	CG18428	CG18428	4	22.56	23.45	22.45	23.49	24.27	23.05	23.51	24.05	23.11	-0.05	-0.29726071	0.205639691	0.69	0.83
CG32675	Tango5	Tango5	Tango5	7	21.66	21.63	21.53	22.29	22.3	22.12	22.18	22.23	22.18	-0.04	-0.257064585	0.177974276	0.69	0.83
CG32435	chb	chb	chb	2	21.53	21.47	21.21	21.65	21.91	21.77	21.69	22.02	21.77	0.05	-0.219895585	0.317096466	0.69	0.83
CG10161	eIF3d1	eIF3d1	eIF3d1	12	24.56	23.92	24.18	24.79	24.58	24.85	24.7	24.74	24.61	-0.06	-0.363776833	0.252578296	0.69	0.83
CG1554	RpII215	RpII215	RpII215	14	22.42	22.08	21.79	22.53	22.89	22.96	22.61	22.84	22.72	-0.07	-0.462769213	0.322213732	0.7	0.83
CG4200	sl	sl	sl	6	20.33	20.61	20.1	20.94	20.97	20.79	20.9	21.06	20.61	-0.05	-0.309220226	0.215779635	0.7	0.83
CG6384	Cp190	Cp190	Cp190	10	22.24	22.23	22	22.81	22.89	22.73	22.7	22.92	22.7	-0.04	-0.260475253	0.182317868	0.7	0.83
CG1240	Non2	Non2	Non2	6	25.46	26.49	25.99	26.86	26.87	26.22	26.39	26.51	26.77	-0.09	-0.607932606	0.426829817	0.7	0.83
CG10377	Hrb27C	Hrb27C	Hrb27C	9	23.81	24.08	23.97	24.49	24.47	24.48	24.48	24.48	24.36	-0.04	-0.269071919	0.189943376	0.71	0.83
CG4039	Mcm6	Mcm6	Mcm6	3	19.62	19.41	19.39	20.04	19.98	20.27	20.3	20.2	19.97	0.06	-0.272991692	0.386630828	0.71	0.83
CG7538	Mcm2	Mcm2	Mcm2	2	18.56	18.97	18.49	19.41	19.16	19.56	19.42	19.04	19.45	-0.08	-0.511357616	0.361309338	0.71	0.83
CG8295	Mlf	Mlf	Mlf	1	16.89	17.49	16.93	18.16	18.27	17.9	17.44	18.81	17.83	-0.08	-0.577383436	0.410167553	0.71	0.84
CG10686	tral	tral	tral	19	25.27	25.06	25.13	25.69	25.63	25.58	25.61	25.69	25.71	0.04	-0.184176445	0.258708666	0.71	0.84
CG18767	mRpL36	mRpL36	mRpL36	1	19.54	18.92	18.4	19.94	20.24	20.42	20.45	20.18	20.25	0.09	-0.469212697	0.653764728	0.72	0.84
CG9281	CG9281	CG9281	CG9281	9	22.48	22.1	22.12	22.91	23.18	23.28	23.04	23.11	23.05	-0.05	-0.371660831	0.267943335	0.72	0.85
CG15792	zip	zip	zip	2	18.33	18.33	17.98	18.92	18.82	19.18	19.17	18.94	18.99	0.06	-0.320487463	0.441909087	0.73	0.85
CG34191	Ufm1	Ufm1	Ufm1	1	17.28	17.53	17.81	18.56	18.19	18.31	18.66	18.06	18.11	-0.07	-0.543376988	0.395024517	0.73	0.85
CG10354	Rat1	Rat1	Rat1	13	23.42	23.53	23.29	23.85	23.69	23.57	23.74	23.64	23.62	-0.04	-0.261230908	0.190915216	0.73	0.86
CG10084	swm	swm	swm	4	18.83	18.69	18.84	19.21	19.18	19.21	18.98	19.19	19.28	-0.05	-0.363555364	0.266744429	0.74	0.86
CG1451	Apc	Apc	Apc	1	17.18	17.09	17.28	17.73	17.68	17.46	17.74	17.67	17.62	0.05	-0.289706151	0.392169279	0.74	0.86
CG7830	Ostgamma	Ostgamma	Ostgamma	1	17.44	16.73	17.4	17.78	18.14	18.16	17.89	18.22	17.74	-0.08	-0.611334042	0.451933236	0.74	0.86
CG17870	14-3-3zeta	14-3-3zeta	14-3-3zeta	3	20.55	20.38	20.23	20.82	21.08	21	20.88	21.1	21.06	0.04	-0.254974565	0.344364273	0.74	0.86
CG17078	CG17078	CG17078	CG17078	8	21.59	21.72	21.58	22.16	22.11	22.09	22.15	22.13	22.17	0.03	-0.189632913	0.253614168	0.75	0.87
CG4003	pont	pont	pont	1	18.29	17.96	17.67	18.45	19.05	18.65	18.34	18.63	18.96	-0.07	-0.60074675	0.451869956	0.76	0.87
CG3158	spn-E	spn-E	spn-E	16	23.02	22.84	22.56	23.46	24.45	24.18	23.69	24.31	23.9	-0.07	-0.528783426	0.398427783	0.76	0.87
CG1837	prtp	prtp	prtp	1	16.72	16.97	16.06	17.25	17.44	17.39	17.23	17.88	17.16	0.06	-0.392310542	0.519733117	0.76	0.87
CG11198	ACC	ACC	ACC	3	18.37	17.95	17.94	19.07	19.35	19.31	19.05	19.61	19.25	0.06	-0.375841198	0.496980254	0.76	0.88
CG4913	ear	ear	ear	10	21.56	21.32	21.63	21.92	21.69	22.09	21.98	22.09	21.77	0.04	-0.274057957	0.361368686	0.76	0.88
CG9754	Panx	Panx	Panx	3	22.9	22.75	20.44	23.21	24.43	23.99	23.56	24.43	24.2	0.19	-1.33756347	1.713107967	0.77	0.88
CG6543	Echs1	Echs1	Echs1	2	19.69	20.05	19.74	20.44	20.19	20.26	20.43	20.55	20.06	0.05	-0.297168177	0.390966985	0.77	0.88
CG2998	RpS28b	RpS28b	RpS28b	2	26.06	25.77	25.42	26.35	26.3	26.41	26.25	26.17	26.49	-0.05	-0.396322948	0.301831032	0.77	0.88
CG8053	eIF1A	eIF1A	eIF1A	4	26.57	25.99	26.47	26.91	26.55	27.04	26.95	26.93	26.75	0.04	-0.273553404	0.356455925	0.77	0.88
CG7424	RpL36A	RpL36A	RpL36A	1	18.93	18.16	18.53	19.7	19.76	20.37	20.48	19.15	20.42	0.07	-0.491449185	0.639678329	0.77	0.88
CG9740	Ibf2	Ibf2	Ibf2	3	20.49	20.27	20.25	20.72	21.06	20.98	20.75	21.05	21.09	0.04	-0.280145588	0.364061699	0.78	0.88
CG10849	Sc2	Sc2	Sc2	3	20.06	19.72	19.19	20.39	21	20.78	19.84	21.01	21.05	-0.09	-0.789840167	0.608491774	0.78	0.88
CG11513	armi	armi	armi	18	23.46	23.36	23.25	24.22	24.58	24.38	24.36	24.58	24.35	0.03	-0.220292696	0.284756254	0.78	0.88
CG3157	gammaTub23C	gammaTub23C	gammaTub23C	2	19.71	19.66	19.24	20.05	20.38	20.4	20.29	20.39	20.29	0.05	-0.314080216	0.404406804	0.78	0.89
CG1065	Scsalpha1	Scsalpha1	Scsalpha1	5	22.25	22.35	22.09	23.13	22.83	22.74	22.97	22.96	22.85	0.03	-0.213176818	0.27382222	0.79	0.89
CG3605	Sf3b2	Sf3b2	Sf3b2	2	19.16	18.97	18.68	19.67	20	19.9	19.86	19.65	19.91	-0.05	-0.435503441	0.340385941	0.79	0.89
CG1078	Fip1	Fip1	Fip1	6	22.44	22.43	22.43	23.08	23.08	23.04	22.8	23.32	22.98	-0.03	-0.304786843	0.238256139	0.79	0.89
CG32346	E(bx)	E(bx)	E(bx)	1	15.8	16.53	16.09	16.65	17.08	17.4	17.13	17.17	16.64	-0.06	-0.594272691	0.466217204	0.79	0.89
CG11447	CG11447	CG11447	CG11447	4	21.19	21.44	21.47	21.94	21.89	21.79	21.94	21.89	21.69	-0.03	-0.308454545	0.242428387	0.79	0.89
CG5642	eIF3l	eIF3l	eIF3l	4	21.28	21.21	20.85	21.98	21.95	21.83	21.85	22.13	21.88	0.03	-0.235099748	0.298519976	0.8	0.89
CG7139	CG7139	CG7139	CG7139	5	19.96	19.71	19.49	20.56	20.42	20.46	20.47	20.87	19.97	-0.05	-0.447764968	0.355497795	0.8	0.9
CG7138	r2d2	r2d2	r2d2	2	19.06	19.25	19.1	19.96	19.96	19.93	20.27	19.82	19.87	0.04	-0.299297166	0.376703501	0.8	0.9
CG10691	l(2)37Cc	l(2)37Cc	l(2)37Cc	3	20.49	20.21	20.15	20.75	20.67	20.59	20.81	20.84	20.46	0.03	-0.243462046	0.305405218	0.81	0.9
CG43665	eIF2gamma	eIF2gamma	eIF2gamma	9	23.01	22.79	22.81	23.36	23.29	23.4	23.42	23.45	23.26	0.03	-0.208068096	0.260353878	0.81	0.9
CG12085	hfp	hfp	hfp	15	25.09	25.21	25.07	25.74	25.87	25.85	25.72	25.99	25.69	-0.02	-0.239668046	0.192087819	0.81	0.9
CG42799	dikar	dikar	dikar	1	15.32	15.16	15.17	15.65	16.36	16.17	15.75	16.46	16.12	0.05	-0.413011387	0.514623103	0.81	0.9
CG12819	sle	sle	sle	6	20.06	19.3	19.47	19.98	20.49	20.7	20.18	20.34	20.48	-0.06	-0.580930317	0.467579381	0.81	0.9
CG4206	Mcm3	Mcm3	Mcm3	3	19.52	19	19.14	19.88	19.9	19.85	19.92	20.07	19.75	0.04	-0.316667885	0.391416862	0.82	0.9
CG9028	ssp2	ssp2	ssp2	1	18.45	18.15	18.28	18.68	18.89	18.72	18.72	18.9	18.78	0.04	-0.308604991	0.380183443	0.82	0.91
CG16724	tra	tra	tra	1	19.01	20.83	19.06	20.23	21.15	19.58	20.01	20.68	20.09	-0.05	-0.593071619	0.484691039	0.83	0.91
CG2684	lds	lds	lds	3	18.8	19.32	19.07	19.97	19.75	19.51	19.7	19.89	19.53	-0.04	-0.413077309	0.340799757	0.83	0.92
CG2033	RpS15Aa	RpS15Aa	RpS15Aa	2	26.39	26.23	26.11	26.56	26.51	26.74	26.55	26.54	26.65	-0.02	-0.269591342	0.223010775	0.84	0.92
CG4619	CG4619	CG4619	CG4619	3	19.56	19.22	18.99	19.75	20.38	20.18	19.96	20.42	19.81	-0.04	-0.496226145	0.412371402	0.84	0.92
CG4877	RAF2	RAF2	RAF2	1	17.56	18.23	17.13	18.74	19.39	18.08	17.99	19.67	18.41	-0.05	-0.549389088	0.457944145	0.84	0.92
CG6146	Top1	Top1	Top1	15	23	22.86	22.96	23.28	23.55	23.59	23.54	23.45	23.49	0.02	-0.23066523	0.275310675	0.85	0.93
CG10811	eIF4G1	eIF4G1	eIF4G1	10	21.6	21.39	21.35	22.27	22.38	22.44	22.28	22.38	22.36	-0.02	-0.275240553	0.230771479	0.85	0.93
CG7636	mRpL2	mRpL2	mRpL2	1	15.04	14.76	15.23	15.97	15.5	15.75	15.6	15.96	15.55	-0.04	-0.518667936	0.437838393	0.85	0.93
CG13277	LSm7	LSm7	LSm7	1	17.51	17.69	17.94	18.32	18.31	18.67	18.6	18.48	18.11	-0.04	-0.483615522	0.408330285	0.85	0.93
CG4539	Bka	Bka	Bka	2	19.78	19.73	19.69	20.46	20.52	20.46	20.32	20.44	20.61	-0.02	-0.304724249	0.258437516	0.86	0.93
CG18212	alt	alt	alt	19	24.11	23.64	23.52	24.47	24.58	24.4	24.25	24.54	24.78	0.03	-0.375384755	0.442095298	0.86	0.93
CG17737	eIF1	eIF1	eIF1	4	23.13	22.89	23.3	23.71	23.78	23.96	23.86	23.92	23.73	0.02	-0.261785376	0.306393797	0.86	0.93
CG4082	Mcm5	Mcm5	Mcm5	2	17.66	17.65	17.35	18.08	18.57	18.65	18.45	18.37	18.39	-0.03	-0.454843116	0.388753577	0.86	0.93
CG12306	polo	polo	polo	6	21.38	21.03	21.06	21.47	21.82	21.74	21.69	21.9	21.52	0.03	-0.310004653	0.362251955	0.86	0.93
CG16941	Sf3a1	Sf3a1	Sf3a1	8	20.98	21.02	20.83	21.61	21.9	21.56	21.42	21.87	21.71	-0.02	-0.288350536	0.248223162	0.87	0.94
CG6223	betaCOP	betaCOP	betaCOP	13	23.97	24.08	24.02	24.49	24.4	24.29	24.46	24.44	24.33	0.02	-0.202170429	0.233818609	0.87	0.94
CG5363	Cdk1	Cdk1	Cdk1	5	22.07	21.6	21.63	22.11	22.56	22.51	22.31	22.51	22.44	0.03	-0.350698668	0.404330915	0.88	0.94
CG9035	Tapdelta	Tapdelta	Tapdelta	2	20.79	20.48	20.69	21.21	21.25	21.14	21.23	21.28	21.04	-0.02	-0.294860132	0.256649757	0.88	0.94
CG32409	CG32409	CG32409	CG32409	2	20.97	21.01	20.62	21.66	21.67	21.74	21.53	21.86	21.61	-0.02	-0.309386504	0.269521062	0.88	0.94
CG5499	His2Av	His2Av	His2Av	1	22.05	22.36	22.54	23.21	22.63	22.98	23.03	22.74	22.98	-0.02	-0.382189207	0.333158657	0.88	0.94
CG31184	LSm3	LSm3	LSm3	1	18.12	18.2	18.74	18.6	18.91	19.01	18.79	18.87	18.78	-0.03	-0.402534886	0.351244265	0.88	0.94
CG2925	noi	noi	noi	5	21.73	21.94	21.71	22.28	22.51	22.33	22.26	22.61	22.31	0.01	-0.199532673	0.228643728	0.88	0.94
CG11148	Gyf	Gyf	Gyf	2	18.12	18.2	18.09	18.73	18.63	18.8	18.62	18.75	18.85	0.02	-0.301601423	0.341024557	0.89	0.95
CG32685	ZAP3	ZAP3	ZAP3	3	17.79	18.16	18.03	18.35	18.61	18.75	18.54	18.7	18.41	-0.02	-0.370570845	0.329148075	0.9	0.95
CG8103	Mi-2	Mi-2	Mi-2	20	22.67	22.75	22.58	23.12	23.44	23.31	23.23	23.37	23.23	-0.01	-0.237197526	0.210984546	0.9	0.95
CG12892	Caf1-105	Caf1-105	Caf1-105	1	18.01	18.36	18.2	18.84	18.88	18.83	18.71	19.06	18.72	-0.02	-0.342138727	0.30455997	0.9	0.95
CG9124	eIF3h	eIF3h	eIF3h	6	22.35	21.96	21.82	22.52	22.45	22.62	22.45	22.53	22.55	-0.02	-0.320724982	0.286288187	0.9	0.95
CG4954	eIF3c	eIF3c	eIF3c	15	22.71	22.48	22.44	23.36	23.34	23.42	23.38	23.43	23.35	0.01	-0.222661982	0.24860709	0.9	0.96
CG17949	His2B:CG17949	His2B:CG17949	His2B:CG17949	4	27.54	27.8	28.01	28.46	27.98	28.4	28.46	27.98	28.46	0.02	-0.304475252	0.339601595	0.9	0.96
CG33526	PNUTS	PNUTS	PNUTS	2	18.76	18.7	18.87	19.35	19.32	19.35	19.33	19.54	19.21	0.02	-0.309121107	0.344560881	0.91	0.96
CG9054	Ddx1	Ddx1	Ddx1	3	19.5	19.3	19.26	19.94	19.83	20.07	19.89	19.89	20.01	-0.02	-0.314852893	0.282874027	0.91	0.96
CG10077	CG10077	CG10077	CG10077	16	23.88	23.4	23.6	23.96	24.21	24.25	24.21	24.06	24.21	0.02	-0.290103083	0.321683316	0.91	0.96
CG7050	Nrx-1	Nrx-1	Nrx-1	1	17.57	17.55	17.26	17.86	18.14	18.08	17.86	18.32	17.85	-0.02	-0.389674651	0.35189071	0.91	0.96
CG32479	Usp10	Usp10	Usp10	1	16.7	17.07	16.77	17.59	17.6	17.66	17.23	18.03	17.63	0.02	-0.379527212	0.418872604	0.91	0.96
CG10542	Bre1	Bre1	Bre1	6	20.66	20.39	20.18	20.78	21.3	21.13	20.79	21.49	20.99	0.02	-0.395107849	0.435996081	0.91	0.96
CG3198	CG3198	CG3198	CG3198	3	21.53	21.92	21.77	22.02	22.35	22.04	22.09	22.27	22.01	-0.01	-0.24538936	0.223417183	0.92	0.96
CG9091	RpL37a	RpL37a	RpL37a	1	23.1	22.95	22.75	23.74	24.06	23.89	23.63	23.94	24.08	-0.01	-0.34127367	0.312438886	0.92	0.96
CG6292	CycT	CycT	CycT	12	22.56	22.32	22.43	23.05	22.81	22.98	23.03	22.97	22.82	-0.01	-0.238200551	0.218364585	0.92	0.96
CG4602	Srp54	Srp54	Srp54	9	24.16	24.22	24.05	24.54	24.69	24.69	24.48	24.78	24.64	-0.01	-0.238823636	0.21905067	0.92	0.96
CG17051	dod	dod	dod	7	23.33	23.31	22.86	23.69	23.91	23.69	23.64	24.1	23.59	0.01	-0.267493031	0.291536682	0.92	0.96
CG6249	Csl4	Csl4	Csl4	1	20.03	20.54	20.43	20.83	20.79	20.8	20.9	20.73	20.83	0.01	-0.316883918	0.343681822	0.93	0.96
CG8415	RpS23	RpS23	RpS23	6	25.68	25.74	25.78	26.12	25.91	26.12	26.19	25.85	26.14	0.01	-0.221246605	0.238472242	0.93	0.97
CG3436	CG3436	CG3436	CG3436	3	20.46	20.27	20.27	20.9	21.21	21.09	21.14	20.93	21.15	0.01	-0.290590748	0.312280738	0.94	0.97
CG4153	eIF2beta	eIF2beta	eIF2beta	3	21.41	20.96	21.19	21.63	21.71	21.82	21.75	21.76	21.69	0.01	-0.275142377	0.294991989	0.94	0.97
CG11858	CG11858	CG11858	CG11858	4	23.49	23.53	23.91	24.62	23.97	24.16	24.42	24.3	24.06	0.01	-0.37677237	0.403926744	0.94	0.97
CG10984	CG10984	CG10984	CG10984	2	18.72	18.94	18.64	19.15	19.5	19.88	19.44	19.77	19.27	-0.02	-0.453710692	0.423698423	0.94	0.97
CG6418	CG6418	CG6418	CG6418	13	22.98	23.05	22.88	23.48	23.45	23.42	23.5	23.52	23.3	-0.01	-0.220108536	0.206349788	0.94	0.97
CG1616	dpa	dpa	dpa	3	19.55	19.31	19.33	19.81	20.22	20.21	20	20.15	20.07	-0.01	-0.357606986	0.335485783	0.94	0.97
CG9088	lid	lid	lid	19	23.33	22.83	22.66	23.31	23.95	23.82	23.35	24.05	23.73	0.02	-0.488930082	0.519707871	0.95	0.97
CG7925	tko	tko	tko	1	20.27	19.75	19.77	20.57	20.05	20.31	20.49	20.28	20.19	0.01	-0.28173552	0.298702774	0.95	0.97
CG8949	wcy	wcy	wcy	3	19.37	19.36	19.3	19.73	20.47	20.02	19.73	20.46	20.01	-0.01	-0.382737138	0.362555279	0.95	0.97
CG2238	eEF2	eEF2	eEF2	29	26.48	26.25	26.11	26.68	26.79	26.8	26.72	26.81	26.76	0.01	-0.244602107	0.258212943	0.95	0.97
CG34186	Rpb12	Rpb12	Rpb12	1	19.95	19.13	19.35	20.13	20.08	20.25	20.19	20.29	20.03	0.01	-0.408083135	0.429903228	0.95	0.97
CG4896	CG4896	CG4896	CG4896	1	15.41	15.24	14.89	15.85	15.81	16	15.88	15.7	16.06	-0.01	-0.448584158	0.426382146	0.96	0.97
CG4878	eIF3b	eIF3b	eIF3b	11	22.67	21.9	22.06	22.94	23.16	23.08	23.08	23.05	23.08	0.01	-0.374709992	0.393643521	0.96	0.97
CG9992	CG9992	CG9992	CG9992	1	19.37	19.73	19.3	20.19	19.97	20.08	20.09	20.56	19.62	0.01	-0.414978261	0.433831636	0.96	0.98
CG5651	pix	pix	pix	13	23.17	23.19	23.08	23.8	23.34	23.41	23.63	23.55	23.36	0	-0.263306209	0.253701659	0.97	0.98
CG13922	mRpL46	mRpL46	mRpL46	2	17.94	17.55	17.55	18.19	17.98	18.31	18.3	18.23	17.98	0.01	-0.364785217	0.378134409	0.97	0.98
CG13628	Rpb10	Rpb10	Rpb10	3	21.26	21.19	20.79	21.61	21.73	21.83	21.58	21.98	21.59	0	-0.336043616	0.327104897	0.98	0.99
CG1966	Acf	Acf	Acf	5	20.31	20.29	20.09	20.68	20.81	20.91	20.74	20.72	20.95	0	-0.293209928	0.300520271	0.98	0.99
CG2522	Gtp-bp	Gtp-bp	Gtp-bp	2	16.56	16.71	16.61	17.16	17.14	17.02	17.16	17.29	16.86	0	-0.35150746	0.343134341	0.98	0.99
CG12010	CG12010	CG12010	CG12010	1	16.69	15.77	16.08	17.34	17.04	16.87	17.04	17.36	16.82	0	-0.507414324	0.497470443	0.98	0.99
CG32163	CG32163	CG32163	CG32163	1	17.7	18	17.67	18.65	19.23	18.22	18.87	18.18	19.07	0	-0.661094804	0.670714366	0.99	0.99
CG10923	Klp67A	Klp67A	Klp67A	4	21.18	20.88	20.68	21.3	22.06	21.66	21.32	21.94	21.74	0	-0.44358521	0.437760274	0.99	0.99
CG10777	mahe	mahe	mahe	9	22.96	22.67	22.47	23.16	23.3	23.36	23.17	23.29	23.37	0	-0.31419805	0.316808927	0.99	1
CG1715	Chchd3	Chchd3	Chchd3	2	17.69	17.19	17.11	18.21	18.74	18.72	18.53	18.29	18.86	0	-0.523594538	0.527041921	0.99	1
CG8573	su(Hw)	su(Hw)	su(Hw)	1	17.93	17.98	18.01	18.79	18.91	18.53	18.65	18.71	18.86	0	-0.351511342	0.351392833	1	1
