# Supplementary material for: Dimerisation of the PICTS complex via LC8/Cut-up drives co-transcriptional transposon silencing in Drosophila
Source: eLife. 2021 Feb 4;10:e65557. doi: 10.7554/eLife.65557 (PMC7861614; doi:10.7554/eLife.65557)
Supplement: Figure 4—source data 1. [file elife-65557-fig4-data1.csv]

Accessions	Gene	GeneSymbol	Description	Unique_peptides	527.1	527.2	527.3	476.1	476.2	476.3	log2FC	P.Value	FDR
CG6998	FBgn0011760	ctp	FBgn0011760	7	21.99	21.85	22	29.58	30.04	29.59	7.79	7.50E-10	1.50E-06
CG31037	FBgn0000247	ca	FBgn0000247	3	18.54	18.32	18.4	21.45	21.53	21.42	3.04	3.80E-09	2.60E-06
CG4897	FBgn0005593	RpL7	FBgn0005593	6	21.13	21.06	21.18	23.86	23.73	24.02	2.75	3.80E-09	2.60E-06
CG8092	FBgn0033998	row	FBgn0033998	16	21.88	21.97	21.81	24.29	24.57	24.35	2.52	8.20E-09	4.10E-06
CG6510	FBgn0010409	RpL18A	FBgn0010409	6	21.85	21.73	21.68	24.58	24.33	24.69	2.78	1.10E-08	4.30E-06
CG9754	FBgn0034617	Panx	FBgn0034617	7	20.26	20.07	20.23	23.67	24.12	23.6	3.61	2.40E-08	7.40E-06
CG5965	FBgn0010328	woc	FBgn0010328	15	22.54	22.65	22.52	24.44	24.65	24.42	1.93	2.60E-08	7.40E-06
CG33967	FBgn0262127	kibra	FBgn0262127	15	20.86	20.58	20.99	24.4	24.88	24.52	3.79	6.10E-08	1.40E-05
CG1962	FBgn0032876	Cen	FBgn0032876	9	20.99	20.72	20.86	23.24	23.55	23.21	2.47	6.40E-08	1.40E-05
CG5502	FBgn0003279	RpL4	FBgn0003279	13	24.02	24.2	23.99	25.69	25.6	25.8	1.63	7.30E-08	1.50E-05
CG8262	FBgn0027513	ana2	FBgn0027513	12	19.98	19.34	19.35	26.41	26.89	26.51	7.05	8.80E-08	1.50E-05
CG7283	FBgn0036213	RpL10Ab	FBgn0036213	6	21.88	22.06	21.75	24.22	24.02	24.36	2.3	9.00E-08	1.50E-05
CG4863	FBgn0020910	RpL3	FBgn0020910	5	22.66	22.58	22.57	24.03	23.89	24.13	1.41	1.50E-07	2.20E-05
CG8079	FBgn0034002	CG8079	FBgn0034002	5	19.61	19.56	19.49	22.61	23.24	22.67	3.29	1.60E-07	2.20E-05
CG6253	FBgn0017579	RpL14	FBgn0017579	5	21.49	21.59	21.32	23.8	23.47	23.83	2.23	1.60E-07	2.20E-05
CG16910	FBgn0041205	key	FBgn0041205	5	19.18	19.36	19.29	21.71	22.13	21.66	2.55	1.90E-07	2.40E-05
CG8615	FBgn0035753	RpL18	FBgn0035753	4	23.43	23.39	23.33	24.66	24.47	24.58	1.18	2.10E-07	2.40E-05
CG7917	FBgn0016685	Nlp	FBgn0016685	4	22.83	22.9	22.94	24.39	24.67	24.38	1.59	2.10E-07	2.40E-05
CG12752	FBgn0028411	Nxt1	FBgn0028411	1	19.03	19.07	19.18	21.09	21.52	21.29	2.21	2.70E-07	2.80E-05
CG4651	FBgn0011272	RpL13	FBgn0011272	6	24.33	24.31	24.2	25.68	25.49	25.76	1.36	2.70E-07	2.80E-05
CG12775	FBgn0032987	RpL21	FBgn0032987	7	22.26	22.16	22.21	23.76	23.66	23.99	1.59	3.00E-07	2.90E-05
CG3329	FBgn0023174	Prosbeta2	FBgn0023174	8	24.41	24.37	24.35	25.21	25.21	25.13	0.81	3.30E-07	2.90E-05
CG7434	FBgn0015288	RpL22	FBgn0015288	3	22.5	22.54	22.34	23.88	23.86	24.08	1.48	3.40E-07	2.90E-05
CG1263	FBgn0261602	RpL8	FBgn0261602	5	22.93	22.75	22.62	24.39	24.39	24.62	1.7	3.40E-07	2.90E-05
CG6509	FBgn0032363	Dlg5	FBgn0032363	14	20.62	21.13	20.93	25.5	25.98	25.34	4.72	5.60E-07	4.40E-05
CG3183	FBgn0033081	geminin	FBgn0033081	10	19.91	18.81	19.32	27.55	27.97	27.45	8.31	6.80E-07	4.40E-05
CG18000	FBgn0003654	sw	FBgn0003654	3	18.4	17.54	17.84	22.12	22.26	21.85	4.15	6.40E-07	4.40E-05
CG4759	FBgn0039359	RpL27	FBgn0039359	3	21.44	21.57	21.47	23	23.01	23.32	1.61	5.90E-07	4.40E-05
CG4030	FBgn0034585	Rbpn-5	FBgn0034585	9	21.24	21.29	21.21	23.92	24.36	23.71	2.75	7.00E-07	4.40E-05
CG3265	FBgn0027066	Eb1	FBgn0027066	8	21.57	21.66	21.61	22.76	23.01	22.91	1.28	6.30E-07	4.40E-05
CG9139	FBgn0262937	Rabex-5	FBgn0262937	9	20.24	20.23	20.33	22.81	23.34	22.71	2.69	6.90E-07	4.40E-05
CG6450	FBgn0029688	lva	FBgn0029688	13	21.14	21.31	21.21	22.3	22.33	22.3	1.09	7.00E-07	4.40E-05
CG18212	FBgn0038535	alt	FBgn0038535	36	25.99	25.93	26.58	30.72	30.78	30.58	4.52	1.00E-06	5.70E-05
CG1475	FBgn0037351	RpL13A	FBgn0037351	2	20.82	20.78	21.11	22.6	22.66	22.9	1.81	7.60E-07	4.70E-05
CG9354	FBgn0037686	RpL34b	FBgn0037686	2	22	21.71	21.84	24.11	23.7	24.16	2.14	8.80E-07	5.30E-05
CG6187	FBgn0032256	RluA-2	FBgn0032256	10	20.13	19.65	19.35	25.45	26.09	25.45	5.96	1.30E-06	6.20E-05
CG3820	FBgn0010660	Nup214	FBgn0010660	5	20.75	21.07	21.1	22.62	22.78	22.56	1.68	9.90E-07	5.70E-05
CG3314	FBgn0014026	RpL7A	FBgn0014026	7	23.95	23.84	23.61	25.29	25.11	25.34	1.45	1.10E-06	6.00E-05
CG42336	FBgn0259238	CG42336	FBgn0259238	1	20.5	20.71	20.55	22.28	22.14	21.95	1.54	1.10E-06	6.00E-05
CG3836	FBgn0003459	stwl	FBgn0003459	14	21.65	22.15	21.54	26.55	27.16	26.61	4.99	1.70E-06	7.20E-05
CG17489	FBgn0064225	RpL5	FBgn0064225	7	23.47	23.34	23.39	24.31	24.2	24.31	0.87	1.20E-06	6.00E-05
CG11125	FBgn0033174	CG11125	FBgn0033174	7	20.76	20.76	20.54	23.91	24.62	23.97	3.48	1.50E-06	6.90E-05
CG4904	FBgn0250843	Prosalpha6	FBgn0250843	17	25.58	25.58	25.68	26.36	26.36	26.27	0.71	1.20E-06	6.10E-05
CG1519	FBgn0023175	Prosalpha7	FBgn0023175	9	25.11	25.1	24.98	25.76	25.83	25.8	0.74	1.30E-06	6.20E-05
CG4918	FBgn0003274	RpLP2	FBgn0003274	4	22.4	22.36	22.2	23.49	23.32	23.4	1.09	1.50E-06	7.00E-05
CG11555	FBgn0086856	CG11555	FBgn0086856	2	21.56	21.37	21.41	20.31	20.13	20.14	-1.26	1.60E-06	7.00E-05
CG4118	FBgn0036640	nxf2	FBgn0036640	10	19.72	19.49	19.07	23.4	24.11	23.58	4.27	2.20E-06	8.50E-05
CG12323	FBgn0029134	Prosbeta5	FBgn0029134	6	23.41	23.62	23.56	24.51	24.48	24.4	0.93	1.60E-06	7.20E-05
CG10158	FBgn0031871	Fgop2	FBgn0031871	8	20.81	20.45	20.65	23.68	24.24	23.56	3.19	2.00E-06	8.30E-05
CG17494	FBgn0040011	Slmap	FBgn0040011	15	24.26	24.2	24.23	25.98	26.22	25.73	1.75	2.10E-06	8.30E-05
CG1691	FBgn0285926	Imp	FBgn0285926	12	22.99	22.83	22.78	23.92	23.79	23.91	1	1.90E-06	8.10E-05
CG14224	FBgn0031057	Ubqn	FBgn0031057	16	20.73	20.11	19.93	24.85	25.44	24.94	4.82	2.90E-06	1.10E-04
CG3422	FBgn0004066	Prosalpha4	FBgn0004066	4	24.34	24.34	24.36	25	25.11	24.98	0.68	2.20E-06	8.50E-05
CG6819	FBgn0026207	mbo	FBgn0026207	12	22.02	22.03	22.03	23.5	23.87	23.4	1.57	2.20E-06	8.50E-05
CG9635	FBgn0023172	RhoGEF2	FBgn0023172	9	19.34	18.72	18.55	22.95	23.56	23.02	4.31	3.20E-06	1.10E-04
CG12740	FBgn0035422	RpL28	FBgn0035422	4	22.55	22.5	22.5	23.79	23.5	23.82	1.19	2.50E-06	9.20E-05
CG2297	FBgn0033268	Obp44a	FBgn0033268	1	19.54	19.34	19.49	20.71	20.74	20.56	1.21	3.50E-06	1.20E-04
CG12000	FBgn0250746	Prosbeta7	FBgn0250746	7	24.91	24.87	24.92	25.44	25.48	25.41	0.54	3.50E-06	1.20E-04
CG7583	FBgn0020496	CtBP	FBgn0020496	8	22.99	23.02	22.91	24	24.4	24.21	1.23	3.60E-06	1.20E-04
CG14648	FBgn0263594	lost	FBgn0263594	15	25.19	25.25	25.24	25.77	25.71	25.77	0.52	4.00E-06	1.30E-04
CG10845	FBgn0039246	CG10845	FBgn0039246	1	18.95	18.95	19.19	20.25	20.33	20.36	1.29	4.10E-06	1.30E-04
CG6392	FBgn0040232	cmet	FBgn0040232	22	20.55	19.57	20.04	24.07	24.54	24.21	4.22	6.50E-06	2.00E-04
CG1009	FBgn0261243	Psa	FBgn0261243	9	22.94	22.73	22.96	24.19	24.02	23.89	1.16	4.70E-06	1.50E-04
CG42679	FBgn0261565	Lmpt	FBgn0261565	2	19.32	19.11	19.34	20.49	20.51	20.37	1.2	5.20E-06	1.70E-04
CG10305	FBgn0261597	RpS26	FBgn0261597	2	23.1	23.21	23.21	24.21	23.97	24.25	0.97	5.60E-06	1.80E-04
CG10600	FBgn0032717	CG10600	FBgn0032717	8	20.08	19.95	19.52	22.6	23.25	22.63	2.97	8.40E-06	2.50E-04
CG8857	FBgn0033699	RpS11	FBgn0033699	4	24.47	24.42	24.48	25.08	24.96	25.09	0.59	7.00E-06	2.10E-04
CG10938	FBgn0016697	Prosalpha5	FBgn0016697	6	24.08	24.05	24.12	24.69	24.77	24.63	0.62	7.00E-06	2.10E-04
CG18397	FBgn0032723	ssp3	FBgn0032723	4	19.68	19.09	19.05	23.33	24.02	23.1	4.21	1.10E-05	3.10E-04
CG8274	FBgn0013756	Mtor	FBgn0013756	11	21.54	21.47	21.39	22.39	22.37	22.21	0.86	8.70E-06	2.60E-04
CG31732	FBgn0045842	yuri	FBgn0045842	1	20.02	19.9	19.85	20.89	20.81	20.8	0.91	8.80E-06	2.60E-04
CG7194	FBgn0035868	CG7194	FBgn0035868	10	24.61	24.45	24.43	25.21	25.12	25.24	0.69	1.00E-05	2.90E-04
CG8053	FBgn0026250	eIF1A	FBgn0026250	4	26.91	26.89	26.93	26.53	26.47	26.52	-0.4	1.10E-05	3.10E-04
CG34412	FBgn0283657	Tlk	FBgn0283657	16	22.36	21.32	21.39	26.44	27.09	26.66	5.04	2.00E-05	5.00E-04
CG17046	FBgn0001316	klar	FBgn0001316	7	20.61	20.12	20.35	21.84	22.26	21.91	1.64	1.20E-05	3.40E-04
CG31671	FBgn0031390	tho2	FBgn0031390	13	24.74	24.72	24.73	24.04	23.7	23.85	-0.87	1.30E-05	3.50E-04
CG8171	FBgn0000996	dup	FBgn0000996	15	19.7	18.08	19.28	25.49	25.98	25.44	6.61	2.20E-05	5.30E-04
CG1619	FBgn0001206	Hmr	FBgn0001206	5	19.2	18.42	18.48	21.73	22.46	21.99	3.36	1.80E-05	4.70E-04
CG10542	FBgn0086694	Bre1	FBgn0086694	3	20.1	20.59	20.17	21.82	21.61	21.7	1.42	1.40E-05	3.60E-04
CG16983	FBgn0025637	SkpA	FBgn0025637	4	20.62	20.67	20.64	21.37	21.49	21.33	0.75	1.60E-05	4.30E-04
CG4051	FBgn0000562	egl	FBgn0000562	7	18.96	17.58	18.73	23.51	24.05	23.54	5.28	2.90E-05	6.40E-04
CG8553	FBgn0261270	Sps1	FBgn0261270	4	21	20.93	21.06	21.83	22.1	21.82	0.92	1.90E-05	4.90E-04
CG10944	FBgn0261592	RpS6	FBgn0261592	3	23.62	23.62	23.6	24.22	24.21	24.43	0.68	2.00E-05	5.00E-04
CG8979	FBgn0033669	PI31	FBgn0033669	6	18.7	16.99	17.47	23.5	23.73	23.36	5.81	3.30E-05	7.00E-04
CG9086	FBgn0030809	Ubr1	FBgn0030809	14	22.82	22.83	22.86	23.31	23.39	23.35	0.51	2.10E-05	5.20E-04
CG16901	FBgn0263396	sqd	FBgn0263396	7	22.41	22.36	21.98	23.35	23.58	23.43	1.2	2.20E-05	5.30E-04
CG7041	FBgn0030082	HP1b	FBgn0030082	2	19.25	19.65	19.37	20.64	20.85	20.56	1.26	2.30E-05	5.50E-04
CG14996	FBgn0035499	Chd64	FBgn0035499	10	26.84	26.84	26.88	27.19	27.23	27.2	0.35	2.30E-05	5.50E-04
CG7808	FBgn0039713	RpS8	FBgn0039713	10	26.27	26.22	26.13	26.67	26.63	26.67	0.45	2.40E-05	5.50E-04
CG17280	FBgn0034877	levy	FBgn0034877	2	24	23.72	23.96	23.06	22.74	22.75	-1.04	2.50E-05	5.70E-04
CG3203	FBgn0029897	RpL17	FBgn0029897	3	20.38	20.37	20.18	21.94	22.47	22.75	2.08	3.40E-05	7.10E-04
CG6251	FBgn0034118	Nup62	FBgn0034118	6	20.95	21.14	21.12	22.38	22.88	22.3	1.45	3.00E-05	6.50E-04
CG2244	FBgn0027951	MTA1-like	FBgn0027951	22	24.41	24.37	24.31	24.86	24.82	24.78	0.46	2.90E-05	6.40E-04
CG6946	FBgn0259139	glo	FBgn0259139	4	20.95	20.91	20.84	21.7	22.07	22.09	1.05	2.90E-05	6.40E-04
CG4877	FBgn0036624	RAF2	FBgn0036624	15	21.36	21.87	22.06	24.1	24.57	24.09	2.48	4.20E-05	8.40E-04
CG17947	FBgn0010215	alpha-Cat	FBgn0010215	1	17.68	17.9	17.85	18.93	18.89	18.9	1.1	3.10E-05	6.70E-04
CG18811	FBgn0042134	Capr	FBgn0042134	13	24.35	24.25	24.33	23.84	23.66	23.73	-0.57	3.20E-05	6.90E-04
CG7471	FBgn0015805	HDAC1	FBgn0015805	7	23.29	23.2	22.99	23.98	24.21	23.97	0.89	3.40E-05	7.10E-04
CG4857	FBgn0026083	tyf	FBgn0026083	8	21.9	21.93	21.94	22.95	23.32	22.82	1.1	3.50E-05	7.20E-04
CG6459	FBgn0034259	P32	FBgn0034259	3	19.95	20	20.05	22.1	22.9	22.04	2.35	4.60E-05	9.00E-04
CG7239	FBgn0031740	CG7239	FBgn0031740	4	20.28	20.45	20.48	21.09	21.19	21.17	0.74	3.80E-05	7.90E-04
CG8815	FBgn0022764	Sin3A	FBgn0022764	4	19.65	19.72	19.64	20.36	20.59	20.53	0.82	4.00E-05	8.10E-04
CG11522	FBgn0039857	RpL6	FBgn0039857	4	21.62	20.51	20.62	24.41	24.23	24.49	3.46	6.30E-05	0.0011
CG7490	FBgn0000100	RpLP0	FBgn0000100	7	22.68	22.71	22.8	23.9	23.46	23.66	0.94	4.20E-05	8.40E-04
CG15445	FBgn0031161	CG15445	FBgn0031161	5	18.58	17.58	17.81	20.75	21.43	20.78	3	5.50E-05	9.60E-04
CG7622	FBgn0002579	RpL36	FBgn0002579	3	22.11	22.38	22.2	23.11	23.41	23.6	1.14	4.70E-05	9.00E-04
CG5684	FBgn0036239	Pop2	FBgn0036239	1	18.87	18.8	18.94	17.73	17.94	17.79	-1.05	4.70E-05	9.00E-04
CG18495	FBgn0263121	Prosalpha1	FBgn0263121	7	25.24	25.37	25.38	26.07	25.95	25.83	0.62	4.70E-05	9.00E-04
CG31196	FBgn0020238	14-3-3epsilon	FBgn0020238	6	22.16	22.21	22.25	22.78	22.68	22.74	0.52	4.80E-05	9.00E-04
CG7424	FBgn0031980	RpL36A	FBgn0031980	1	21.4	20.99	21.31	22.19	22.17	22.36	1.01	4.80E-05	9.00E-04
CG18332	FBgn0027055	CSN3	FBgn0027055	5	21.8	21.69	21.81	22.29	22.33	22.32	0.55	4.90E-05	9.10E-04
CG14962	FBgn0035407	Asciz	FBgn0035407	4	17.84	15.61	16.52	22.99	23.04	22.77	6.28	7.90E-05	0.0012
CG2615	FBgn0086657	IKKepsilon	FBgn0086657	18	21.86	20.26	20.32	26.17	26.68	26.06	5.49	8.30E-05	0.0013
CG6846	FBgn0036825	RpL26	FBgn0036825	6	24.92	24.95	24.87	25.34	25.25	25.32	0.39	5.20E-05	9.50E-04
CG7893	FBgn0040068	Vav	FBgn0040068	2	18.84	18.8	18.9	19.72	19.61	19.69	0.82	5.20E-05	9.50E-04
CG6905	FBgn0265574	Cdc5	FBgn0265574	5	21.04	21.21	21.06	21.82	21.71	21.72	0.65	5.20E-05	9.50E-04
CG9327	FBgn0261394	Prosalpha3	FBgn0261394	7	24.72	24.97	25.04	25.72	25.62	25.58	0.73	5.30E-05	9.50E-04
CG5519	FBgn0261119	Prp19	FBgn0261119	6	21.32	21.51	21.24	22.09	22.02	22.07	0.7	5.40E-05	9.60E-04
CG34379	FBgn0085408	Shrm	FBgn0085408	11	19.19	20.7	18.63	25.57	25.83	25.45	6.11	8.90E-05	0.0013
CG4535	FBgn0029174	Fkbp59	FBgn0029174	4	19.56	19.68	19.69	20.46	20.32	20.36	0.74	5.50E-05	9.60E-04
CG5986	FBgn0043455	CG5986	FBgn0043455	1	21.64	21.66	21.69	21.04	21.02	21.16	-0.59	5.90E-05	0.001
CG6964	FBgn0010825	Gug	FBgn0010825	2	17.06	16.54	16.21	19.51	20.89	20.15	3.58	7.40E-05	0.0012
CG6513	FBgn0061515	endos	FBgn0061515	3	24.26	24.2	24.32	23.79	23.75	23.86	-0.46	6.20E-05	0.0011
CG15435	FBgn0031608	CG15435	FBgn0031608	1	19.01	19.16	19.02	19.9	20.01	19.81	0.84	6.50E-05	0.0011
CG10360	FBgn0003231	ref(2)P	FBgn0003231	3	17.11	14.88	15.78	22.11	22.7	21.83	6.29	1.00E-04	0.0014
CG11267	FBgn0036334	CG11267	FBgn0036334	3	20.39	20.73	20.69	19.7	19.75	19.64	-0.9	6.50E-05	0.0011
CG10367	FBgn0263782	Hmgcr	FBgn0263782	5	17.85	15.61	16.52	22.42	22.69	22.45	5.86	1.00E-04	0.0015
CG3395	FBgn0010408	RpS9	FBgn0010408	12	26.51	26.47	26.51	26.9	26.8	26.93	0.38	6.90E-05	0.0012
CG3576	FBgn0040918	schlank	FBgn0040918	2	18.99	19.34	19.2	20.27	20.11	20.07	0.97	7.10E-05	0.0012
CG10652	FBgn0086710	RpL30	FBgn0086710	2	22.75	22.51	22.41	23.45	23.38	23.73	0.96	7.30E-05	0.0012
CG5214	FBgn0037891	CG5214	FBgn0037891	2	19.65	19.51	19.4	20.34	20.25	20.41	0.81	7.30E-05	0.0012
CG1703	FBgn0030321	CG1703	FBgn0030321	19	25.26	25.24	25.2	24.87	24.92	24.9	-0.34	7.40E-05	0.0012
CG11140	FBgn0010548	Aldh-III	FBgn0010548	2	20.55	20.39	20.36	19.77	19.59	19.63	-0.77	7.40E-05	0.0012
CG15442	FBgn0285948	RpL27A	FBgn0285948	3	24.43	24.66	24.67	25.42	25.17	25.43	0.75	8.00E-05	0.0012
CG31098	FBgn0051098	CG31098	FBgn0051098	13	28.1	28.07	28.06	28.41	28.35	28.47	0.33	8.40E-05	0.0013
CG11897	FBgn0039644	rdog	FBgn0039644	1	20.37	20.14	20.3	21.24	21.21	21.69	1.11	8.50E-05	0.0013
CG3647	FBgn0001978	stc	FBgn0001978	1	18.28	18.25	18.19	19.07	19.23	19.4	0.99	8.80E-05	0.0013
CG3606	FBgn0285954	caz	FBgn0285954	5	25.38	25.43	25.43	25.04	25.11	25.08	-0.34	8.90E-05	0.0013
CG12114	FBgn0086362	spn-F	FBgn0086362	13	24.35	23.97	24.03	25.53	25.76	25.26	1.4	1.20E-04	0.0016
CG16812	FBgn0032488	CG16812	FBgn0032488	1	20.85	20.86	20.72	20.16	19.81	19.91	-0.85	9.10E-05	0.0014
CG4457	FBgn0015298	Srp19	FBgn0015298	1	17.86	17.75	17.6	16.46	16.62	16.46	-1.23	9.40E-05	0.0014
CG5870	FBgn0250788	beta-Spec	FBgn0250788	18	22.88	22.93	22.73	23.38	23.4	23.33	0.53	9.50E-05	0.0014
CG42278	FBgn0259173	corn	FBgn0259173	9	18.8	16.46	17.81	23.62	24.05	23.58	6.06	1.50E-04	0.0019
CG17838	FBgn0038826	Syp	FBgn0038826	2	18.58	18.76	18.57	19.86	19.47	19.65	1.02	1.00E-04	0.0014
CG17521	FBgn0024733	RpL10	FBgn0024733	3	24.11	24.01	24.11	24.52	24.56	24.75	0.54	1.00E-04	0.0015
CG6654	FBgn0038301	CG6654	FBgn0038301	3	17.11	14.88	15.78	21.09	21.51	21.05	5.3	1.50E-04	0.0019
CG1193	FBgn0037375	kat-60L1	FBgn0037375	1	19.54	18.81	19.18	17.73	17.48	17.76	-1.52	1.10E-04	0.0015
CG11858	FBgn0039305	CG11858	FBgn0039305	4	23.18	23.24	23.19	22.69	22.81	22.78	-0.44	1.10E-04	0.0015
CG14781	FBgn0260986	mei-38	FBgn0260986	1	20.14	19.58	20.37	18.6	18.44	18.55	-1.5	1.10E-04	0.0015
CG10249	FBgn0027596	Kank	FBgn0027596	22	21.24	21.35	19.1	26.7	26.98	26.68	6.22	1.80E-04	0.0022
CG4747	FBgn0043456	Ndf	FBgn0043456	16	24.55	24.55	24.31	25.13	25.06	24.98	0.59	1.10E-04	0.0015
CG6621	FBgn0037855	CG6621	FBgn0037855	6	21.87	22.18	21.98	22.68	22.75	22.64	0.68	1.10E-04	0.0016
CG11981	FBgn0026380	Prosbeta3	FBgn0026380	5	23.2	23.42	23.41	23.95	24.09	23.87	0.63	1.10E-04	0.0016
CG9135	FBgn0031769	CG9135	FBgn0031769	3	20.5	20.11	20.32	19.42	19.42	19.5	-0.86	1.20E-04	0.0016
CG12363	FBgn0024432	Dlc90F	FBgn0024432	3	19.04	20.58	18.83	24.07	24.31	24.04	4.66	1.90E-04	0.0023
CG4087	FBgn0002593	RpLP1	FBgn0002593	2	20.77	20.79	21.04	21.92	21.55	21.84	0.9	1.20E-04	0.0016
CG31884	FBgn0040070	Trx-2	FBgn0040070	4	22.27	22.52	22.41	21.72	21.85	21.66	-0.66	1.20E-04	0.0016
CG6056	FBgn0043012	AP-2sigma	FBgn0043012	2	20.44	20.53	20.61	21.05	21.2	21.21	0.63	1.20E-04	0.0016
CG6831	FBgn0260442	rhea	FBgn0260442	11	21.55	21.7	21.73	22.21	22.38	22.21	0.61	1.30E-04	0.0016
CG10119	FBgn0010397	LamC	FBgn0010397	7	21.64	21.74	21.49	22.22	22.25	22.17	0.59	1.30E-04	0.0017
CG1621	FBgn0263240	Coop	FBgn0263240	3	17.11	14.88	15.78	20.76	21.32	20.92	5.08	1.90E-04	0.0023
CG8507	FBgn0037756	CG8507	FBgn0037756	10	26.53	26.5	26.48	26.23	26.22	26.24	-0.28	1.40E-04	0.0018
CG6122	FBgn0004872	piwi	FBgn0004872	23	24.68	24.59	24.61	25.19	24.97	25.11	0.46	1.50E-04	0.0019
CG34394	FBgn0085423	GramD1B	FBgn0085423	1	19.22	19.26	19.32	19.95	19.91	19.86	0.64	1.50E-04	0.0019
CG5825	FBgn0014857	His3.3A	FBgn0014857	2	23.16	23.16	23.25	23.64	23.54	23.59	0.4	1.60E-04	0.002
CG10849	FBgn0035471	Sc2	FBgn0035471	4	22.31	22.75	22.44	23.23	23.31	23.31	0.79	1.60E-04	0.002
CG7065	FBgn0030091	CG7065	FBgn0030091	9	21.71	21.87	21.62	22.25	22.36	22.34	0.58	1.70E-04	0.002
CG9998	FBgn0005411	U2af50	FBgn0005411	8	24.61	24.59	24.51	24.13	24.21	24.24	-0.38	1.70E-04	0.002
CG12400	FBgn0031505	ND-B14.5B	FBgn0031505	3	19.88	19.14	19.43	20.65	20.83	20.76	1.27	1.80E-04	0.0021
CG9128	FBgn0283500	Sac1	FBgn0283500	4	20.72	20.87	20.91	21.39	21.34	21.44	0.55	1.90E-04	0.0023
CG1234	FBgn0037489	CG1234	FBgn0037489	2	20.39	20.39	20.36	20.87	20.86	20.83	0.48	2.00E-04	0.0024
CG1406	FBgn0033210	U2A	FBgn0033210	1	17.38	17.07	17.06	18.34	18.15	18.18	1.05	2.00E-04	0.0024
CG8542	FBgn0001220	Hsc70-5	FBgn0001220	10	22.99	22.88	23.05	23.45	23.58	23.39	0.5	2.10E-04	0.0024
CG30159	FBgn0050159	CG30159	FBgn0050159	3	22.12	22.04	22.08	22.5	22.47	22.47	0.4	2.10E-04	0.0025
CG33213	FBgn0053213	CG33213	FBgn0053213	1	15.53	13.29	15.51	19.76	20.03	19.6	5.02	3.00E-04	0.0032
CG12359	FBgn0027603	Ulp1	FBgn0027603	3	17.06	15.76	17.21	19.33	19.72	19.52	2.85	2.60E-04	0.0029
CG13364	FBgn0026879	CG13364	FBgn0026879	1	25.02	24.94	25.13	24.66	24.46	24.52	-0.49	2.20E-04	0.0026
CG31211	FBgn0051211	CG31211	FBgn0051211	4	20.57	20.65	20.58	19.71	19.89	20.06	-0.71	2.30E-04	0.0027
CG2096	FBgn0000711	flw	FBgn0000711	1	17.18	17.47	17.01	18.27	18.26	18.32	1.07	2.40E-04	0.0027
CG32675	FBgn0052675	Tango5	FBgn0052675	6	22.97	23	23.15	22.54	22.28	22.51	-0.6	2.40E-04	0.0027
CG3949	FBgn0286786	hoip	FBgn0286786	3	22.78	22.9	22.91	23.41	23.27	23.28	0.45	2.40E-04	0.0027
CG4111	FBgn0029785	RpL35	FBgn0029785	3	23.94	24.02	23.93	24.45	24.38	24.68	0.54	2.50E-04	0.0029
CG3983	FBgn0038473	Ns1	FBgn0038473	12	23.06	22.82	22.87	23.51	23.38	23.4	0.51	2.60E-04	0.0029
CG9148	FBgn0025682	scf	FBgn0025682	11	24.41	24.48	24.46	24.84	24.72	24.83	0.34	2.70E-04	0.003
CG1622	FBgn0030468	CG1622	FBgn0030468	14	26.6	26.58	26.66	26.35	26.37	26.31	-0.27	2.80E-04	0.003
CG15100	FBgn0034401	MetRS	FBgn0034401	7	21.25	21.25	21.28	21.81	21.68	21.66	0.46	2.80E-04	0.003
CG11856	FBgn0039302	Nup358	FBgn0039302	25	24.44	24.39	24.34	24.86	24.7	24.74	0.37	2.90E-04	0.0031
CG16903	FBgn0040394	CG16903	FBgn0040394	12	24.05	23.91	23.94	24.33	24.3	24.31	0.35	2.90E-04	0.0031
CG12340	FBgn0027499	wde	FBgn0027499	4	17.53	15.29	16.19	20.81	21.57	20.69	4.69	4.20E-04	0.0042
CG32190	FBgn0052190	NUCB1	FBgn0052190	10	23.95	23.88	23.83	24.25	24.19	24.24	0.34	3.00E-04	0.0032
CG3621	FBgn0025839	ND-B14.5A	FBgn0025839	2	20.83	20.77	20.9	20.26	19.78	19.81	-0.88	3.00E-04	0.0032
CG44037	FBgn0264829	CG44037	FBgn0264829	1	23.62	23.64	23.85	24.44	24.2	24.21	0.58	3.00E-04	0.0032
CG10805	FBgn0086451	l(2)k09022	FBgn0086451	2	17.78	17.39	17.62	18.89	19.01	18.46	1.19	3.10E-04	0.0033
CG7726	FBgn0013325	RpL11	FBgn0013325	3	24.65	24.53	24.61	24.98	24.88	25.01	0.36	3.10E-04	0.0033
CG15715	FBgn0036538	CG15715	FBgn0036538	1	23.55	23.34	23.58	22.81	22.83	23.05	-0.59	3.20E-04	0.0034
CG9373	FBgn0267790	rump	FBgn0267790	4	20.53	20.71	20.27	21.2	21.58	21.6	0.95	3.30E-04	0.0034
CG5942	FBgn0000212	brm	FBgn0000212	7	20.71	20.88	20.88	21.29	21.34	21.3	0.49	3.40E-04	0.0035
CG1911	FBgn0039680	Cap-D2	FBgn0039680	7	21.56	21.32	21.57	22.09	22.02	21.99	0.55	3.40E-04	0.0035
CG8485	FBgn0033915	CG8485	FBgn0033915	1	21.04	20.93	21.1	20.58	20.5	20.45	-0.51	3.50E-04	0.0035
CG17331	FBgn0032596	Prosbeta4	FBgn0032596	8	24.27	24.44	24.54	24.87	24.85	24.93	0.46	3.60E-04	0.0037
CG5338	FBgn0039129	RpS19b	FBgn0039129	2	20.75	20.67	20.59	21.26	21.12	21.14	0.5	3.60E-04	0.0037
CG4097	FBgn0002284	Prosbeta6	FBgn0002284	7	24	24.16	24.14	24.53	24.87	24.63	0.58	3.70E-04	0.0037
CG4602	FBgn0024285	Srp54	FBgn0024285	4	20.85	20.96	20.83	21.61	21.4	21.35	0.57	3.80E-04	0.0038
CG11143	FBgn0025885	Inos	FBgn0025885	2	18.58	18.22	18.66	20.03	21.05	21.21	2.28	4.90E-04	0.0047
CG32491	FBgn0002781	mod(mdg4)	FBgn0002781	4	20.77	20.88	20.81	21.37	21.25	21.24	0.47	3.80E-04	0.0038
CG1977	FBgn0250789	alpha-Spec	FBgn0250789	32	24.32	24.35	24.29	24.57	24.6	24.61	0.28	3.90E-04	0.0038
CG5353	FBgn0027081	ThrRS	FBgn0027081	4	20.93	21.14	21.14	21.81	21.71	21.53	0.61	4.30E-04	0.0042
CG4849	FBgn0039566	CG4849	FBgn0039566	13	23.39	23.42	23.3	23.66	23.76	23.73	0.35	4.60E-04	0.0045
CG1420	FBgn0039626	Slu7	FBgn0039626	11	24.3	24.22	24.34	23.83	23.8	24	-0.41	4.60E-04	0.0045
CG2003	FBgn0039886	CG2003	FBgn0039886	3	23.62	23.78	23.98	23.31	23.17	23.17	-0.58	4.80E-04	0.0046
CG5215	FBgn0263603	Zn72D	FBgn0263603	1	18.57	18.81	18.84	19.62	19.46	19.39	0.75	4.90E-04	0.0047
CG10923	FBgn0004379	Klp67A	FBgn0004379	2	21.19	21.05	21.5	20.35	20.03	20.52	-0.95	4.90E-04	0.0047
CG16973	FBgn0010909	msn	FBgn0010909	3	20.21	20.23	20.24	20.75	20.63	20.65	0.45	5.00E-04	0.0047
CG1877	FBgn0015509	Cul1	FBgn0015509	1	16.58	16.49	16.37	17.32	17.52	17.47	0.96	5.00E-04	0.0047
CG3226	FBgn0029882	CG3226	FBgn0029882	3	21.03	21.18	21.01	21.67	21.73	21.47	0.55	5.20E-04	0.0048
CG2173	FBgn0021995	Rs1	FBgn0021995	7	23.28	23.34	23.19	23.57	23.72	23.66	0.38	5.20E-04	0.0048
CG10123	FBgn0040268	Top3alpha	FBgn0040268	4	20.55	20.16	20.25	21.04	20.93	21.02	0.67	5.20E-04	0.0048
CG6531	FBgn0030941	wgn	FBgn0030941	1	20.63	20.81	20.58	21.54	21.17	21.34	0.68	5.20E-04	0.0048
CG6875	FBgn0000140	asp	FBgn0000140	5	21.27	21.32	21.2	20.9	20.77	20.72	-0.47	5.20E-04	0.0048
CG33804	FBgn0053804	His1:CG33804	FBgn0053804	4	24.56	24.44	24.35	24.77	24.86	24.92	0.4	5.30E-04	0.0049
CG6016	FBgn0033844	bbc	FBgn0033844	1	18.04	18.04	17.96	19.04	18.62	18.91	0.84	5.30E-04	0.0049
CG13900	FBgn0035162	Sf3b3	FBgn0035162	6	20.92	21.04	21.09	21.58	21.4	21.56	0.49	5.40E-04	0.0049
CG1799	FBgn0003204	ras	FBgn0003204	1	19.01	19.28	19.12	19.91	19.72	19.76	0.66	5.40E-04	0.0049
CG8368	FBgn0286051	Rexo5	FBgn0286051	1	16.74	16.51	16.57	17.54	17.46	17.55	0.91	5.50E-04	0.005
CG17420	FBgn0028697	RpL15	FBgn0028697	4	22.04	20.62	20.66	24.07	23.81	24.1	2.89	8.70E-04	0.0069
CG2922	FBgn0250753	kra	FBgn0250753	7	22.72	22.65	22.52	23.07	23.13	22.97	0.43	6.30E-04	0.0056
CG2919	FBgn0261004	asl	FBgn0261004	1	18.2	18.05	18.48	19.32	19.08	19.01	0.89	6.40E-04	0.0057
CG4236	FBgn0263979	Caf1-55	FBgn0263979	7	24.43	24.36	24.36	24.75	24.62	24.67	0.3	6.40E-04	0.0057
CG15367	FBgn0040467	Dlip1	FBgn0040467	1	15.53	13.29	16.96	21.95	22.26	21.29	6.57	9.70E-04	0.0074
CG1084	FBgn0037240	Cont	FBgn0037240	4	19.97	19.62	19.49	21.01	20.61	20.47	1	6.50E-04	0.0058
CG4143	FBgn0262732	mbf1	FBgn0262732	3	24.25	24.22	24.29	23.92	23.9	24.02	-0.31	6.50E-04	0.0058
CG31729	FBgn0051729	CG31729	FBgn0051729	4	19.93	20.27	20.06	20.78	20.65	20.65	0.61	6.60E-04	0.0058
CG14235	FBgn0031066	COX6B	FBgn0031066	1	22.73	22.28	22.53	21.86	21.56	21.85	-0.76	6.60E-04	0.0058
CG8055	FBgn0086656	shrb	FBgn0086656	5	21.56	21.72	21.62	21.98	22.08	22.05	0.4	6.70E-04	0.0059
CG6178	FBgn0039156	CG6178	FBgn0039156	2	19.46	19.46	19.07	20.23	20.17	19.96	0.79	6.80E-04	0.0059
CG2746	FBgn0285950	RpL19	FBgn0285950	4	22.68	22.88	22.74	23.66	23.2	23.5	0.69	6.90E-04	0.006
CG12085	FBgn0028577	hfp	FBgn0028577	3	20.47	20.28	20.18	21.33	20.92	20.95	0.76	6.90E-04	0.006
CG18617	FBgn0028670	Vha100-2	FBgn0028670	3	21.42	21.33	21.24	21.68	21.87	21.88	0.48	7.00E-04	0.006
CG5676	FBgn0032200	CG5676	FBgn0032200	1	18.9	18.89	18.96	18	16.85	17.24	-1.55	7.00E-04	0.006
CG5330	FBgn0015268	Nap1	FBgn0015268	8	23.8	23.88	23.77	24.24	24.08	24.16	0.34	7.00E-04	0.006
CG6605	FBgn0000183	BicD	FBgn0000183	21	24.14	23.95	23.92	24.5	24.36	24.38	0.41	7.10E-04	0.006
CG1347	FBgn0037363	Atg17	FBgn0037363	7	19.1	16.85	17.77	21.65	22.01	21.6	3.85	0.0011	0.0077
CG8396	FBgn0015299	Ssb-c31a	FBgn0015299	6	27.97	27.97	28	27.77	27.8	27.78	-0.19	7.50E-04	0.0063
CG4806	FBgn0260456	CG4806	FBgn0260456	4	21.07	21.16	20.98	21.47	21.75	21.57	0.53	7.70E-04	0.0065
CG8996	FBgn0010516	wal	FBgn0010516	3	20.99	20.92	21.04	21.36	21.43	21.34	0.39	7.70E-04	0.0065
CG9750	FBgn0040075	rept	FBgn0040075	4	20.48	20.63	20.37	20.96	20.98	20.98	0.48	7.90E-04	0.0066
CG2890	FBgn0030208	PPP4R2r	FBgn0030208	8	21.53	21.56	21.56	22.02	21.9	21.87	0.38	8.00E-04	0.0067
CG2021	FBgn0035271	CG2021	FBgn0035271	1	19.16	19.04	19.13	19.59	19.63	19.68	0.52	8.20E-04	0.0068
CG12186	FBgn0027082	ProRS-m	FBgn0027082	1	18.37	17.96	18.38	17.11	17.17	17.47	-0.98	8.30E-04	0.0068
CG1559	FBgn0030354	Upf1	FBgn0030354	3	18.79	18.59	18.73	19.38	19.28	19.26	0.6	8.40E-04	0.0068
CG6620	FBgn0024227	aurB	FBgn0024227	4	21.77	21.92	21.75	21.44	21.15	21.28	-0.52	8.40E-04	0.0068
CG2331	FBgn0286784	TER94	FBgn0286784	36	30	29.9	29.99	30.32	30.17	30.23	0.28	8.50E-04	0.0069
CG7971	FBgn0035253	CG7971	FBgn0035253	8	24.14	24.28	24.32	24.56	24.6	24.55	0.32	8.60E-04	0.0069
CG4254	FBgn0011726	tsr	FBgn0011726	5	25.06	25.05	24.99	24.61	24.68	24.81	-0.33	8.60E-04	0.0069
CG12252	FBgn0035026	Fcp1	FBgn0035026	2	20.75	20.68	20.69	21.29	21.14	21.06	0.46	8.60E-04	0.0069
CG10897	FBgn0033636	tou	FBgn0033636	4	20.25	20.34	20.17	21.02	20.75	20.71	0.58	8.70E-04	0.0069
CG5474	FBgn0011016	SsRbeta	FBgn0011016	3	24.31	24.32	24.25	24.83	24.62	24.59	0.39	8.70E-04	0.0069
CG4527	FBgn0035001	Slik	FBgn0035001	6	21.58	21.65	21.48	22.01	21.92	21.94	0.39	9.00E-04	0.0072
CG11471	FBgn0027086	IleRS	FBgn0027086	26	24.39	24.42	24.46	24.65	24.69	24.65	0.24	9.10E-04	0.0072
CG15697	FBgn0038834	RpS30	FBgn0038834	2	28.29	28.15	28.09	27.77	27.77	27.92	-0.36	9.10E-04	0.0072
CG10333	FBgn0032690	CG10333	FBgn0032690	14	23.68	23.69	23.64	24.05	23.94	23.91	0.3	9.40E-04	0.0073
CG9401	FBgn0002736	mago	FBgn0002736	1	19.13	19.05	19.12	19.56	19.62	19.61	0.5	9.50E-04	0.0074
CG5393	FBgn0015903	apt	FBgn0015903	11	25.21	25.32	25.3	25.9	25.67	25.58	0.44	9.60E-04	0.0074
CG3496	FBgn0003977	vir	FBgn0003977	5	23.02	23.11	23.15	22.82	22.66	22.71	-0.36	9.70E-04	0.0074
CG5394	FBgn0005674	GluProRS	FBgn0005674	34	25.22	25.16	25.24	25.56	25.43	25.45	0.27	9.80E-04	0.0074
CG4389	FBgn0028479	Mtpalpha	FBgn0028479	22	25.58	25.63	25.57	25.91	25.81	25.8	0.25	9.80E-04	0.0074
CG14472	FBgn0011230	poe	FBgn0011230	9	21.12	21.08	21.24	21.48	21.67	21.57	0.43	9.80E-04	0.0074
CG3224	FBgn0029885	CG3224	FBgn0029885	5	22.75	22.79	22.76	22.46	22.51	22.42	-0.3	9.80E-04	0.0074
CG2843	FBgn0031452	Cwc25	FBgn0031452	7	23.67	23.58	23.61	23.98	23.88	23.89	0.29	9.90E-04	0.0075
CG8759	FBgn0086904	Nacalpha	FBgn0086904	5	24.13	24.16	24.1	23.79	23.86	23.91	-0.28	9.90E-04	0.0075
CG3499	FBgn0034792	YME1L	FBgn0034792	7	21.62	21.45	21.49	22.04	22.39	21.98	0.62	0.001	0.0075
CG6692	FBgn0013770	Cp1	FBgn0013770	4	22.38	22.49	22.56	22.96	22.78	22.88	0.4	0.001	0.0075
CG7977	FBgn0026372	RpL23A	FBgn0026372	9	26.3	26.14	26.16	26.51	26.43	26.52	0.29	0.001	0.0075
CG6303	FBgn0266717	Bruce	FBgn0266717	2	18.71	18.57	18.7	19.55	19.21	19.26	0.68	0.001	0.0075
CG7928	FBgn0039740	ZIPIC	FBgn0039740	6	24.66	24.8	24.67	24.99	24.98	24.98	0.28	0.001	0.0077
CG6339	FBgn0034728	rad50	FBgn0034728	10	22.61	22.54	22.59	23	22.89	22.85	0.33	0.001	0.0077
CG8282	FBgn0032005	Snx6	FBgn0032005	3	21.28	21.25	21.2	20.91	20.89	20.81	-0.37	0.001	0.0077
CG11009	FBgn0036318	Wbp2	FBgn0036318	1	20.13	20.51	20.26	21.09	20.96	20.81	0.65	0.0011	0.0077
CG17471	FBgn0039924	PIP4K	FBgn0039924	5	22.46	22.35	22.43	22.72	22.75	22.7	0.31	0.0011	0.0077
CG5787	FBgn0032454	CG5787	FBgn0032454	11	23.73	23.6	23.61	23.35	23.32	23.38	-0.3	0.0011	0.008
CG3158	FBgn0003483	spn-E	FBgn0003483	4	20.74	20.54	20.6	21.03	21.08	21.02	0.42	0.0011	0.008
CG9282	FBgn0032518	RpL24	FBgn0032518	2	24.22	24.08	23.99	24.47	24.46	24.41	0.35	0.0011	0.008
CG7358	FBgn0030974	Flacc	FBgn0030974	7	22.73	22.69	22.57	22.96	23.07	23.19	0.41	0.0011	0.008
CG3214	FBgn0031436	ND-B17.2	FBgn0031436	2	21.79	21.8	22.01	22.36	22.23	22.29	0.43	0.0011	0.0081
CG7939	FBgn0002626	RpL32	FBgn0002626	1	17.04	17.06	17.25	17.99	18.27	17.79	0.9	0.0011	0.0082
CG33554	FBgn0053554	Nipped-A	FBgn0053554	1	19.64	19.28	19.3	20.16	20.62	20.08	0.88	0.0012	0.0082
CG4046	FBgn0034743	RpS16	FBgn0034743	11	27.76	27.71	27.74	27.97	27.93	28.09	0.26	0.0012	0.0083
CG12301	FBgn0036514	CG12301	FBgn0036514	15	24.32	24.3	24.11	24.54	24.67	24.6	0.37	0.0012	0.0084
CG11417	FBgn0024364	CG11417	FBgn0024364	10	23.11	23.12	23.1	22.88	22.78	22.82	-0.28	0.0012	0.0084
CG31611	FBgn0051611	His4:CG31611	FBgn0051611	6	24.95	24.92	25.06	25.45	25.22	25.48	0.4	0.0012	0.0084
CG7057	FBgn0263351	AP-2mu	FBgn0263351	6	22.07	22.03	22.08	22.43	22.31	22.4	0.32	0.0012	0.0084
CG10315	FBgn0034858	eIF2Bdelta	FBgn0034858	5	21.01	21.22	21.12	21.49	21.51	21.55	0.4	0.0012	0.0084
CG6582	FBgn0286781	cass	FBgn0286781	3	22.44	22.42	22.54	22.16	21.81	21.89	-0.52	0.0012	0.0086
CG2931	FBgn0037342	CG2931	FBgn0037342	4	21.43	21.32	21.45	20.84	20.94	21.09	-0.44	0.0013	0.0087
CG18426	FBgn0021895	ytr	FBgn0021895	6	24.71	24.92	24.83	25.13	25.12	25.12	0.3	0.0013	0.0087
CG32082	FBgn0052082	IRSp53	FBgn0052082	1	18.49	18.22	18.47	19.06	19.13	18.94	0.65	0.0013	0.0088
CG11844	FBgn0046214	vig2	FBgn0046214	9	26.19	26.05	26.11	25.82	25.83	25.91	-0.26	0.0013	0.0088
CG3510	FBgn0000405	CycB	FBgn0000405	2	20	20.01	20.08	19.55	19.52	19.67	-0.45	0.0013	0.0088
CG13849	FBgn0038964	Nop56	FBgn0038964	10	23.95	23.95	23.93	24.26	24.15	24.35	0.31	0.0013	0.0088
CG17291	FBgn0260439	Pp2A-29B	FBgn0260439	10	23.85	23.83	23.97	24.13	24.2	24.18	0.29	0.0013	0.0089
CG8475	FBgn0031995	CG8475	FBgn0031995	5	20.89	20.76	20.79	21.34	21.14	21.21	0.42	0.0013	0.0091
CG6141	FBgn0015756	RpL9	FBgn0015756	2	21.32	21.47	21.39	21.78	21.96	22.23	0.6	0.0014	0.0091
CG42312	FBgn0259212	cno	FBgn0259212	4	20.45	20.32	20.23	20.69	20.97	20.97	0.54	0.0014	0.0091
CG2145	FBgn0030251	CG2145	FBgn0030251	1	16.31	13.29	14.19	19.09	18.66	19.05	4.34	0.0018	0.011
CG12304	FBgn0036515	AIMP2	FBgn0036515	5	21.75	21.71	21.83	22.24	22.04	22.14	0.38	0.0014	0.0091
CG9809	FBgn0037248	srl	FBgn0037248	3	21.88	21.53	21.57	22.24	22.27	22.09	0.54	0.0014	0.0091
CG1994	FBgn0027330	l(1)G0020	FBgn0027330	29	25.65	25.62	25.47	25.96	25.82	25.89	0.31	0.0014	0.0092
CG8732	FBgn0263120	Acsl	FBgn0263120	1	17.68	17.83	17.93	18.36	18.54	18.56	0.67	0.0014	0.0092
CG5720	FBgn0028471	Nab2	FBgn0028471	4	20.94	21.08	20.77	21.45	21.54	21.33	0.51	0.0014	0.0093
CG17170	FBgn0003559	su(f)	FBgn0003559	2	19.11	19.24	19	19.61	19.61	19.72	0.53	0.0014	0.0093
CG7538	FBgn0014861	Mcm2	FBgn0014861	17	23.97	24.08	23.94	24.3	24.22	24.33	0.29	0.0014	0.0093
CG3845	FBgn0010488	NAT1	FBgn0010488	9	22.14	22.24	22.22	21.85	21.94	21.84	-0.33	0.0014	0.0094
CG12141	FBgn0027084	LysRS	FBgn0027084	8	22.05	22.03	22.21	22.53	22.39	22.5	0.38	0.0014	0.0094
CG1822	FBgn0014133	bif	FBgn0014133	1	18.42	18.3	18.41	17.86	17.68	17.6	-0.66	0.0015	0.0095
CG4817	FBgn0010278	Ssrp	FBgn0010278	34	31.43	31.35	31.44	31.74	31.57	31.67	0.25	0.0015	0.0097
CG10302	FBgn0284256	bsf	FBgn0284256	13	22.29	22.48	22.4	22.72	22.72	22.73	0.33	0.0015	0.0098
CG6235	FBgn0004889	tws	FBgn0004889	6	22.46	22.41	22.49	22.73	22.81	22.71	0.3	0.0015	0.0098
CG6057	FBgn0040283	SMC1	FBgn0040283	1	17.36	17.57	17.56	18.26	18.09	18.16	0.67	0.0015	0.0098
CG31368	FBgn0051368	CG31368	FBgn0051368	16	23.01	23.04	23.08	23.28	23.33	23.45	0.31	0.0015	0.0098
CG8844	FBgn0021967	ND-PDSW	FBgn0021967	3	22.31	22.33	22.3	21.98	21.54	21.46	-0.65	0.0016	0.0099
CG11752	FBgn0030292	CG11752	FBgn0030292	1	19.11	19.06	18.99	18.4	18.55	18.12	-0.7	0.0016	0.0099
CG12156	FBgn0029959	Rab39	FBgn0029959	4	22.05	21.92	21.97	22.48	22.25	22.38	0.39	0.0016	0.01
CG5395	FBgn0005322	nmd	FBgn0005322	2	19.58	19.05	19.65	18.66	18.56	18.5	-0.85	0.0016	0.01
CG10851	FBgn0004587	B52	FBgn0004587	9	25.91	25.84	25.83	26.13	26.03	26.18	0.25	0.0016	0.01
CG18259	FBgn0030956	CG18259	FBgn0030956	7	23.93	23.85	23.91	23.48	23.67	23.61	-0.31	0.0016	0.01
CG1554	FBgn0003277	RpII215	FBgn0003277	28	24.22	24.09	24.14	24.55	24.42	24.4	0.3	0.0017	0.01
CG11660	FBgn0036187	RIOK1	FBgn0036187	13	25.09	24.88	25.14	24.64	24.37	24.66	-0.48	0.0017	0.01
CG6272	FBgn0036126	Irbp18	FBgn0036126	2	20.85	20.7	21	20.18	20.28	20.46	-0.55	0.0017	0.01
CG11586	FBgn0035520	CG11586	FBgn0035520	5	22.91	22.96	22.96	22.64	22.46	22.67	-0.35	0.0017	0.01
CG5317	FBgn0032404	RpL7-like	FBgn0032404	3	21.74	19.65	19.6	23.75	23.78	23.81	3.45	0.0024	0.014
CG2168	FBgn0017545	RpS3A	FBgn0017545	14	28.04	28	28.04	28.23	28.17	28.22	0.18	0.0017	0.01
CG1866	FBgn0039581	Moca-cyp	FBgn0039581	7	24.66	24.65	24.59	24.81	24.91	24.92	0.25	0.0017	0.011
CG10579	FBgn0005640	Eip63E	FBgn0005640	12	25.02	25.08	25.26	24.76	24.72	24.84	-0.35	0.0017	0.011
CG10648	FBgn0030067	Rbm13	FBgn0030067	3	19.97	20.57	20.5	21.1	21.17	21.05	0.76	0.0018	0.011
CG5014	FBgn0029687	Vap33	FBgn0029687	6	23.12	23.23	23.16	23.51	24.01	23.72	0.58	0.0019	0.011
CG18608	FBgn0014269	prod	FBgn0014269	2	20.21	20.05	19.91	20.46	20.68	20.56	0.51	0.0019	0.011
CG5838	FBgn0015664	Dref	FBgn0015664	9	22.82	22.89	22.78	23.17	23.11	23.06	0.29	0.0019	0.011
CG8597	FBgn0011640	lark	FBgn0011640	4	21.48	21.39	21.47	21.82	21.72	21.97	0.39	0.0019	0.011
CG43665	FBgn0263740	eIF2gamma	FBgn0263740	9	23.97	24.13	24.09	24.37	24.29	24.39	0.29	0.0019	0.011
CG7748	FBgn0011336	Stt3B	FBgn0011336	4	20.93	21	21.17	21.54	21.35	21.54	0.44	0.002	0.012
CG14005	FBgn0031739	CG14005	FBgn0031739	6	22.93	22.97	22.81	23.47	23.33	23.17	0.42	0.002	0.012
CG4164	FBgn0031256	shv	FBgn0031256	1	19.15	18.69	18.89	18.27	18.24	18.11	-0.7	0.002	0.012
CG2206	FBgn0027280	l(1)G0193	FBgn0027280	2	22.59	22.92	22.83	23.72	23.37	23.25	0.67	0.0021	0.012
CG11857	FBgn0039303	CG11857	FBgn0039303	2	19.69	19.67	19.47	20.13	20.03	20.06	0.46	0.002	0.012
CG15118	FBgn0034418	CG15118	FBgn0034418	6	20.75	20.66	20.72	20.43	20.15	20.24	-0.44	0.0021	0.012
CG6838	FBgn0037182	ArfGAP3	FBgn0037182	1	19.77	19.74	19.57	19.28	19.06	18.89	-0.61	0.0021	0.012
CG8029	FBgn0262515	VhaAC45	FBgn0262515	1	18.61	18.98	18.73	19.28	19.73	19.51	0.73	0.0021	0.012
CG15415	FBgn0031549	Spindly	FBgn0031549	18	28.12	28.09	28.19	28.46	28.31	28.35	0.24	0.0021	0.012
CG6815	FBgn0287225	bor	FBgn0287225	6	21.74	21.79	21.98	22.35	22.14	22.3	0.43	0.0021	0.012
CG7029	FBgn0039026	CG7029	FBgn0039026	3	18.52	17.73	18.02	19.33	20.38	19.43	1.62	0.0024	0.014
CG4464	FBgn0010412	RpS19a	FBgn0010412	6	28.34	28.2	28.21	27.98	28.06	28.01	-0.23	0.0022	0.012
CG9539	FBgn0086357	Sec61alpha	FBgn0086357	4	22.22	22.38	22.26	22.71	22.53	22.7	0.36	0.0022	0.013
mCherry	NA	NA	NA	11	31.18	31.55	31.51	28.07	27.79	25.37	-4.34	0.0035	0.018
CG5352	FBgn0262601	SmB	FBgn0262601	4	22.44	22.39	22.51	22.74	22.69	22.74	0.28	0.0023	0.013
CG32315	FBgn0024510	dlt	FBgn0024510	2	17	17.37	17.23	18.01	17.94	17.82	0.73	0.0023	0.013
CG5508	FBgn0027579	mino	FBgn0027579	1	15.53	16.42	14.19	17.83	18.32	17.94	2.65	0.0027	0.015
CG1725	FBgn0001624	dlg1	FBgn0001624	1	18.06	17.85	18.23	18.73	18.6	18.99	0.72	0.0025	0.014
CG18081	FBgn0036537	CG18081	FBgn0036537	1	19.95	19.92	20.22	19.58	19.34	19.54	-0.54	0.0025	0.014
CG9088	FBgn0031759	lid	FBgn0031759	31	24.8	24.7	24.67	25.2	24.94	25.03	0.34	0.0025	0.014
CG4035	FBgn0015218	eIF4E1	FBgn0015218	2	19.67	19.58	19.6	19.94	20.02	20.13	0.41	0.0025	0.014
CG9983	FBgn0001215	Hrb98DE	FBgn0001215	8	23.89	23.92	23.82	23.56	23.66	23.64	-0.25	0.0026	0.014
CG9328	FBgn0032886	CG9328	FBgn0032886	1	18.26	17.46	17.87	17.08	16.5	16.43	-1.2	0.0026	0.015
CG10417	FBgn0033021	CG10417	FBgn0033021	10	22.86	22.83	22.98	23.35	23.14	23.19	0.34	0.0026	0.015
CG31012	FBgn0027598	cindr	FBgn0027598	2	20.52	20.62	20.4	20.94	20.83	20.95	0.39	0.0026	0.015
CG11205	FBgn0003082	phr	FBgn0003082	1	16.89	16.95	16.6	15.83	16.02	15.33	-1.09	0.0026	0.015
CG10798	FBgn0262656	Myc	FBgn0262656	1	21.04	21.2	21.3	21.65	21.52	21.55	0.39	0.0027	0.015
CG11207	FBgn0030241	feo	FBgn0030241	1	20.49	20.42	20.73	20.1	19.72	20.03	-0.6	0.0027	0.015
CG4039	FBgn0025815	Mcm6	FBgn0025815	16	24.42	24.51	24.39	24.62	24.87	24.82	0.33	0.0027	0.015
CG7597	FBgn0037093	Cdk12	FBgn0037093	7	22.74	22.9	22.73	23.07	23.16	23.07	0.31	0.0028	0.015
CG8877	FBgn0033688	Prp8	FBgn0033688	34	24.47	24.45	24.47	24.7	24.65	24.63	0.2	0.0028	0.015
CG32593	FBgn0264078	Flo2	FBgn0264078	2	17.99	17.29	17.45	18.6	18.45	18.36	0.89	0.0028	0.015
CG30176	FBgn0034918	Pym	FBgn0034918	2	21.98	21.86	21.66	21.38	21.46	21.43	-0.41	0.0028	0.015
CG2072	FBgn0026326	Mad1	FBgn0026326	4	20.04	20.41	20.49	21.1	20.85	20.84	0.62	0.0028	0.015
CG12051	FBgn0000043	Act42A	FBgn0000043	4	24.48	24.49	24.39	24.97	24.65	24.88	0.38	0.0028	0.015
CG12264	FBgn0032393	Nfs1	FBgn0032393	7	21.54	21.72	21.65	22.02	21.96	21.92	0.33	0.0028	0.015
CG4147	FBgn0001218	Hsc70-3	FBgn0001218	18	24.84	24.97	24.96	25.21	25.15	25.12	0.24	0.0028	0.015
CG3333	FBgn0259937	Nop60B	FBgn0259937	9	24	24.06	24.03	24.2	24.33	24.41	0.28	0.0028	0.015
CG12176	FBgn0030506	DNAlig4	FBgn0030506	1	21.39	21.1	21.11	21.59	21.82	21.62	0.48	0.0029	0.015
CG15717	FBgn0030451	CG15717	FBgn0030451	1	18.83	18.8	18.67	19.19	19.33	19.22	0.48	0.0029	0.016
CG12749	FBgn0004237	Hrb87F	FBgn0004237	6	22.89	22.86	22.71	22.43	22.56	22.51	-0.32	0.0029	0.016
CG7611	FBgn0037094	CG7611	FBgn0037094	1	16.96	13.29	14.19	19.54	19.62	19.33	4.68	0.0039	0.019
CG5266	FBgn0086134	Prosalpha2	FBgn0086134	7	23.83	24.02	24	24.18	24.56	24.49	0.46	0.003	0.016
CG18591	FBgn0261790	SmE	FBgn0261790	2	22.07	22	21.95	22.24	22.31	22.35	0.29	0.003	0.016
CG12343	FBgn0033556	CG12343	FBgn0033556	1	17.87	17.99	18	17.48	17.08	16.9	-0.8	0.003	0.016
CG4429	FBgn0262734	eIF4H1	FBgn0262734	8	26.05	26.03	26.09	25.7	25.83	25.89	-0.25	0.003	0.016
CG8949	FBgn0030812	wcy	FBgn0030812	6	23.96	24.1	24.1	24.32	24.33	24.26	0.25	0.003	0.016
CG2658	FBgn0024992	Spg7	FBgn0024992	1	17.8	17.98	17.8	18.85	18.51	18.35	0.71	0.0031	0.016
CG15304	FBgn0083167	Neb-cGP	FBgn0083167	1	21.55	21.64	21.6	21.3	21.16	21.33	-0.33	0.0031	0.016
CG8153	FBgn0004698	Xpc	FBgn0004698	1	18.41	18.33	18.32	17.7	17.59	17.94	-0.61	0.0031	0.016
CG32438	FBgn0052438	SMC5	FBgn0052438	1	17.63	17.53	17.51	18	18.22	18.28	0.6	0.0031	0.016
CG1403	FBgn0011710	Sep-01	FBgn0011710	5	22.22	22.31	22.38	22.58	22.57	22.65	0.29	0.0031	0.016
CG6061	FBgn0033846	mip120	FBgn0033846	7	21.68	21.59	21.71	21.37	21.05	21.31	-0.42	0.0032	0.017
CG5363	FBgn0004106	Cdk1	FBgn0004106	5	21.29	21.33	21.27	21.61	21.54	21.57	0.28	0.0033	0.017
CG4937	FBgn0030808	RhoGAP15B	FBgn0030808	1	20.99	20.81	21.16	20.43	20.16	20.6	-0.59	0.0033	0.017
CG9615	FBgn0037569	tex	FBgn0037569	1	18.52	18.35	18.46	18.82	19.05	19.06	0.53	0.0033	0.017
CG8863	FBgn0038145	Droj2	FBgn0038145	7	23.18	23.3	23.33	23.52	23.6	23.51	0.27	0.0033	0.017
CG12532	FBgn0010380	AP-1-2beta	FBgn0010380	11	23.39	23.41	23.48	23.71	23.62	23.82	0.29	0.0033	0.017
CG3712	FBgn0040907	mRpL33	FBgn0040907	1	22.57	22.38	22.42	22.01	21.92	22.21	-0.41	0.0033	0.017
CG14206	FBgn0285947	RpS10b	FBgn0285947	7	26.41	26.23	26.28	25.89	26.05	26.09	-0.3	0.0034	0.017
CG10354	FBgn0031868	Rat1	FBgn0031868	6	22.77	22.51	22.59	22.36	22.16	22.21	-0.38	0.0034	0.017
CG6779	FBgn0002622	RpS3	FBgn0002622	14	28.12	28.04	28.16	28.42	28.28	28.3	0.23	0.0034	0.017
CG5655	FBgn0011305	Rsf1	FBgn0011305	3	23.31	23.28	23.29	22.93	22.91	23.13	-0.31	0.0034	0.017
CG2252	FBgn0004656	fs(1)h	FBgn0004656	5	22.61	22.78	22.75	22.95	23.18	23.04	0.34	0.0034	0.017
CG10465	FBgn0033017	CG10465	FBgn0033017	1	16.1	15.45	15.79	16.51	17.17	17.03	1.12	0.0034	0.017
CG11808	FBgn0034000	CG11808	FBgn0034000	2	21.59	21.62	21.72	21.91	21.91	21.96	0.28	0.0035	0.018
CG8392	FBgn0010590	Prosbeta1	FBgn0010590	8	23.73	23.83	23.74	23.96	24.27	24.12	0.35	0.0035	0.018
CG4183	FBgn0001225	Hsp26	FBgn0001225	3	22.44	22.49	22.41	22.89	22.67	22.72	0.31	0.0035	0.018
CG7911	FBgn0039735	Nph	FBgn0039735	4	22.77	22.92	22.94	23.12	23.42	23.26	0.39	0.0036	0.018
CG13389	FBgn0010265	RpS13	FBgn0010265	5	23.54	23.76	23.65	24.04	24.61	24.68	0.8	0.0043	0.02
CG7564	FBgn0036734	CG7564	FBgn0036734	10	26.12	26.17	26.18	25.95	26	26	-0.17	0.0037	0.018
CG7437	FBgn0262737	mub	FBgn0262737	1	21.3	21.27	21.2	20.57	21	20.76	-0.48	0.0038	0.019
CG8583	FBgn0035771	Sec63	FBgn0035771	4	20.04	19.92	20.15	20.47	20.34	20.5	0.4	0.0039	0.019
CG7014	FBgn0038277	RpS5b	FBgn0038277	3	24.24	24.23	24.35	24.51	24.45	24.56	0.23	0.0039	0.019
CG32343	FBgn0052343	Atac3	FBgn0052343	1	19.77	19.62	19.89	19.09	19.34	19.35	-0.5	0.0039	0.019
CG42514	FBgn0260388	CG42514	FBgn0260388	1	17.67	17.38	17.61	18.35	18.04	18.16	0.63	0.004	0.019
CG4537	FBgn0032153	CG4537	FBgn0032153	1	20.48	20.43	20.57	20.06	20.17	20.2	-0.35	0.004	0.019
CG3722	FBgn0003391	shg	FBgn0003391	1	17.01	16.4	17.13	15.88	14.25	15.11	-1.77	0.004	0.019
CG9805	FBgn0037249	eIF3a	FBgn0037249	27	26.41	26.36	26.41	26.59	26.52	26.59	0.17	0.004	0.02
CG3756	FBgn0031657	CG3756	FBgn0031657	3	23.66	23.51	23.19	21.24	22.53	21.9	-1.56	0.0053	0.024
CG3480	FBgn0023509	mip130	FBgn0023509	3	21.96	21.85	21.75	21.56	21.48	21.57	-0.32	0.0041	0.02
CG17183	FBgn0035149	MED30	FBgn0035149	3	21.18	21.11	21.21	21.74	21.42	21.52	0.4	0.0041	0.02
CG3585	FBgn0023458	Rbcn-3A	FBgn0023458	10	22.18	22.14	22.14	22.59	22.34	22.48	0.32	0.0041	0.02
CG9281	FBgn0030672	CG9281	FBgn0030672	8	22.6	22.64	22.55	22.83	22.82	22.99	0.28	0.0042	0.02
CG8604	FBgn0027356	Amph	FBgn0027356	1	16.51	16.52	16.83	17.52	17.18	17.42	0.75	0.0042	0.02
CG32435	FBgn0021760	chb	FBgn0021760	1	16.65	16.39	16.77	17.41	17.24	17.31	0.71	0.0042	0.02
CG42668	FBgn0261550	CG42668	FBgn0261550	3	17.23	17.76	15.78	19.38	19.7	18.86	2.39	0.0053	0.024
CG31278	FBgn0051278	CG31278	FBgn0051278	1	17.47	18.04	18.12	18.47	18.86	18.89	0.86	0.0043	0.021
CG3338	FBgn0031598	Vps53	FBgn0031598	1	20.37	20.21	20.32	20.92	20.69	20.59	0.43	0.0044	0.021
CG2446	FBgn0030328	Amun	FBgn0030328	1	18.14	17.96	18.15	18.58	18.77	18.52	0.54	0.0044	0.021
CG6944	FBgn0002525	Lam	FBgn0002525	22	26.36	26.54	26.41	26.63	26.76	26.66	0.24	0.0045	0.021
CG4494	FBgn0264922	smt3	FBgn0264922	1	20.37	20.37	20.56	20.75	20.77	20.78	0.34	0.0046	0.021
CG17921	FBgn0010228	HmgZ	FBgn0010228	1	19.54	19.44	19.62	18.48	17.3	16.52	-2.09	0.0056	0.025
CG5205	FBgn0038344	obe	FBgn0038344	1	17.25	16.79	17.16	17.7	17.72	17.93	0.72	0.0046	0.022
CG1416	FBgn0032961	CG1416	FBgn0032961	3	20.33	20.14	20.15	20.54	20.64	20.52	0.36	0.0046	0.022
CG7421	FBgn0037137	Nopp140	FBgn0037137	11	26.76	26.72	26.65	26.88	26.95	26.86	0.19	0.0046	0.022
CG3289	FBgn0016698	Ptpa	FBgn0016698	1	17.35	17.66	16.79	18.14	18.16	18.25	0.92	0.0046	0.022
CG9241	FBgn0032929	Mcm10	FBgn0032929	1	20.97	21.05	21.03	20.78	20.48	20.65	-0.38	0.0047	0.022
CG8110	FBgn0024187	syd	FBgn0024187	1	15.53	13.29	14.74	16.83	16.61	16.6	2.16	0.0049	0.023
CG4659	FBgn0010747	Srp54k	FBgn0010747	3	20.2	20.36	20.5	20.75	20.69	20.77	0.38	0.0048	0.022
CG3180	FBgn0262955	RpII140	FBgn0262955	18	23.95	23.96	24.03	24.25	24.13	24.21	0.22	0.0049	0.023
CG4153	FBgn0004926	eIF2beta	FBgn0004926	5	23.23	23.21	23.14	23.45	23.36	23.44	0.23	0.0049	0.023
CG32230	FBgn0052230	ND-MLRQ	FBgn0052230	3	22.3	22.38	22.26	22.12	22	22.02	-0.27	0.0049	0.023
CG18124	FBgn0028530	mTTF	FBgn0028530	7	21.53	21.53	21.86	22.06	22	22.07	0.41	0.005	0.023
CG8103	FBgn0262519	Mi-2	FBgn0262519	28	24.77	24.75	24.72	24.91	24.91	24.92	0.17	0.005	0.023
CG4973	FBgn0038772	mdlc	FBgn0038772	4	23.55	23.31	23.55	23.12	22.85	23.17	-0.42	0.0051	0.023
CG17143	FBgn0035110	thoc7	FBgn0035110	1	17.63	18.41	18.25	18.98	18.96	18.82	0.83	0.0051	0.023
CG7830	FBgn0032015	Ostgamma	FBgn0032015	3	18.99	19.27	20.25	21.1	20.67	21.04	1.44	0.0065	0.028
CG12909	FBgn0033507	CG12909	FBgn0033507	8	24.28	24.27	24.19	24.11	23.93	23.92	-0.26	0.0054	0.024
CG6259	FBgn0036740	Vps60	FBgn0036740	3	21.46	21.33	21.3	21.62	21.66	21.66	0.28	0.0054	0.024
CG13345	FBgn0086356	tum	FBgn0086356	1	17.2	16.68	17.1	17.78	18.09	17.57	0.82	0.0054	0.024
CG12225	FBgn0028982	Spt6	FBgn0028982	4	20.43	20.36	20.23	20.78	20.69	20.61	0.35	0.0055	0.025
CG9915	FBgn0030738	CG9915	FBgn0030738	8	22.79	22.75	22.76	22.57	22.57	22.52	-0.21	0.0055	0.025
CG9028	FBgn0036389	ssp2	FBgn0036389	1	17.57	16.97	17.5	18.08	18	18.25	0.76	0.0055	0.025
CG3109	FBgn0023519	mRpL16	FBgn0023519	1	17.43	16.81	17.08	16.44	16.02	16.23	-0.88	0.0055	0.025
CG8590	FBgn0011606	Klp3A	FBgn0011606	2	22.38	22.53	22.54	22.25	22.22	22.17	-0.27	0.0055	0.025
CG2028	FBgn0015024	CkIalpha	FBgn0015024	5	20.91	20.75	20.66	21.06	21.22	21.12	0.36	0.0056	0.025
CG17569	FBgn0286567	gry	FBgn0286567	11	22.37	22.34	22.34	22.74	22.53	22.6	0.28	0.0056	0.025
CG3095	FBgn0001189	hfw	FBgn0001189	1	24.39	24.34	24.31	24.49	24.55	24.63	0.21	0.0056	0.025
CG2867	FBgn0004901	Prat	FBgn0004901	3	20.47	20.59	20.62	20.94	20.83	20.85	0.31	0.0057	0.025
CG7516	FBgn0261535	l(2)34Fd	FBgn0261535	3	22.92	22.95	23.1	22.76	22.59	22.72	-0.3	0.0057	0.025
CG31638	FBgn0051638	CG31638	FBgn0051638	3	20.78	20.38	20.58	21.03	21	20.98	0.43	0.0057	0.025
CG5271	FBgn0003942	RpS27A	FBgn0003942	4	22.16	22.83	22.32	23.67	24.07	23.17	1.2	0.0073	0.03
CG16865	FBgn0028919	CG16865	FBgn0028919	4	22.04	21.86	22.21	21.58	21.29	21.7	-0.51	0.0058	0.025
CG4264	FBgn0266599	Hsc70-4	FBgn0266599	17	27.6	27.59	27.57	27.82	27.72	27.71	0.16	0.0058	0.025
CG1071	FBgn0024371	E2f2	FBgn0024371	3	19.95	20.01	19.66	20.25	20.45	20.3	0.46	0.0058	0.025
CG3762	FBgn0263598	Vha68-2	FBgn0263598	21	24.28	24.35	24.29	24.46	24.52	24.49	0.18	0.0059	0.026
CG14788	FBgn0266284	Ns3	FBgn0266284	6	22.88	22.77	22.77	22.63	22.46	22.53	-0.27	0.006	0.026
CG31363	FBgn0051363	Jupiter	FBgn0051363	6	24.12	24.14	24.05	23.92	23.88	23.94	-0.19	0.006	0.026
CG2614	FBgn0032873	CG2614	FBgn0032873	3	17.82	18.76	17.43	19.17	19.26	19.46	1.3	0.0066	0.028
CG2046	FBgn0037378	PSMG1	FBgn0037378	1	17	17.74	16.97	18.11	18.04	18.13	0.86	0.0061	0.026
CG6133	FBgn0026079	Nsun2	FBgn0026079	28	26.52	26.44	26.54	26.88	26.63	26.78	0.26	0.0061	0.026
CG7262	FBgn0038274	Nup93-2	FBgn0038274	18	24.26	24.35	24.3	24.53	24.45	24.48	0.19	0.0062	0.027
CG10293	FBgn0264491	how	FBgn0264491	1	18.69	18.84	19	19.27	19.27	19.31	0.45	0.0062	0.027
CG4170	FBgn0024183	vig	FBgn0024183	8	23.53	23.57	23.42	23.21	23.33	23.27	-0.24	0.0063	0.027
CG18102	FBgn0003392	shi	FBgn0003392	3	21.24	21.12	21.02	21.69	21.44	21.42	0.39	0.0064	0.027
CG2968	FBgn0028342	ATPsyndelta	FBgn0028342	3	23.1	23.34	23.15	22.4	22.91	22.73	-0.52	0.0066	0.028
CG44255	FBgn0265190	PIG-S	FBgn0265190	3	19.71	19.6	19.67	20	19.96	19.96	0.31	0.0065	0.028
CG5010	FBgn0260747	Chchd2	FBgn0260747	1	19.35	19.65	19.24	19.91	19.82	19.92	0.47	0.0065	0.028
CG14941	FBgn0000588	esc	FBgn0000588	2	20.08	19.56	19.58	20.21	20.4	20.34	0.58	0.0065	0.028
CG3057	FBgn0019830	colt	FBgn0019830	1	19.66	19.85	19.87	20.36	20.05	20.25	0.43	0.0066	0.028
CG4033	FBgn0003278	RpI135	FBgn0003278	8	22.2	22.18	22.03	22.38	22.38	22.44	0.27	0.0066	0.028
CG5920	FBgn0004867	RpS2	FBgn0004867	9	27.12	27.21	27.2	27.33	27.31	27.39	0.16	0.0066	0.028
CG1469	FBgn0015221	Fer2LCH	FBgn0015221	1	19.38	19.12	19.26	18.7	18.94	18.6	-0.51	0.0067	0.028
CG5174	FBgn0034345	CG5174	FBgn0034345	5	22.05	21.88	22.45	22.7	22.66	22.58	0.52	0.0068	0.028
CG12109	FBgn0030054	Caf1-180	FBgn0030054	2	20.06	20.44	20.16	20.72	20.68	20.55	0.43	0.0068	0.028
CG10269	FBgn0022935	D19A	FBgn0022935	1	18.15	18.15	18.21	18.9	18.5	18.67	0.52	0.0068	0.028
CG32210	FBgn0262517	Ltn1	FBgn0262517	3	19.23	19.27	19.06	19.8	19.79	19.45	0.49	0.0068	0.028
CG12019	FBgn0011573	Cdc37	FBgn0011573	2	20.43	20.33	20.28	20.64	20.69	21.02	0.43	0.0068	0.028
CG3231	FBgn0086129	snama	FBgn0086129	15	24.34	24.33	24.14	24.55	24.58	24.46	0.26	0.0069	0.029
CG12819	FBgn0037810	sle	FBgn0037810	7	22.09	22.19	22.06	22.29	22.45	22.39	0.26	0.0069	0.029
CG3752	FBgn0012036	Aldh	FBgn0012036	18	25.8	25.88	25.88	26.19	26	26.04	0.23	0.0069	0.029
CG12223	FBgn0278608	Dsp1	FBgn0278608	1	19.96	19.97	19.88	20.24	20.18	20.35	0.32	0.0069	0.029
CG4337	FBgn0010438	mtSSB	FBgn0010438	6	25.99	26.02	25.95	25.75	25.87	25.8	-0.18	0.007	0.029
CG1451	FBgn0015589	Apc	FBgn0015589	1	18.04	18.07	18.13	17.66	17.62	17.57	-0.46	0.007	0.029
CG13418	FBgn0038903	RpI12	FBgn0038903	1	17.11	17.19	17.15	17.78	17.65	17.6	0.52	0.007	0.029
CG33950	FBgn0284408	trol	FBgn0284408	2	16.97	14.99	16.86	18.28	18.29	18.87	2.21	0.0083	0.032
CG2767	FBgn0037537	CG2767	FBgn0037537	1	17.46	17.03	16.65	16.42	15.75	15.58	-1.13	0.0071	0.029
CG1101	FBgn0010774	Ref1	FBgn0010774	9	26.29	26.22	26.11	25.86	25.98	26.05	-0.25	0.0071	0.029
CG6066	FBgn0039488	CG6066	FBgn0039488	2	22.71	22.66	22.45	22.9	23.03	22.86	0.32	0.0071	0.029
CG4038	FBgn0011824	CG4038	FBgn0011824	6	24.22	24.36	24.35	24.5	24.52	24.51	0.2	0.0071	0.029
CG12179	FBgn0025388	CG12179	FBgn0025388	1	22.05	21.61	21.77	21.26	20.77	21.36	-0.69	0.0076	0.03
CG5913	FBgn0039385	CG5913	FBgn0039385	2	21.86	21.77	21.95	21.61	21.6	21.59	-0.26	0.0073	0.029
CG3689	FBgn0035987	Cpsf5	FBgn0035987	6	23.61	23.53	23.9	23.27	22.95	23.33	-0.5	0.0076	0.03
CG18347	FBgn0260743	GC1	FBgn0260743	2	19.42	19.58	19.52	19.9	19.89	19.77	0.35	0.0073	0.03
CG5263	FBgn0016070	smg	FBgn0016070	1	16.54	16.01	16.82	15.79	14.26	14.49	-1.61	0.0074	0.03
CG5003	FBgn0039554	CG5003	FBgn0039554	1	17.2	17.17	17.3	18.05	17.65	17.75	0.59	0.0074	0.03
CG10161	FBgn0040227	eIF3d1	FBgn0040227	10	25.18	25.2	25.16	25	25.02	25.06	-0.15	0.0074	0.03
CG1242	FBgn0001233	Hsp83	FBgn0001233	21	26.34	26.45	26.53	26.75	26.63	26.61	0.23	0.0075	0.03
CG9206	FBgn0001108	DCTN1-p150	FBgn0001108	7	22.17	21.98	22.06	21.36	21.74	21.77	-0.44	0.0075	0.03
CG11347	FBgn0035542	DOR	FBgn0035542	1	16.48	16.58	16.49	17.07	17.06	17.55	0.71	0.0076	0.03
CG4738	FBgn0262647	Nup160	FBgn0262647	2	19.97	20.02	20.01	20.46	20.26	20.26	0.33	0.0076	0.03
CG7765	FBgn0001308	Khc	FBgn0001308	30	25.76	25.67	25.81	26.03	25.91	25.91	0.21	0.0076	0.03
CG5728	FBgn0039182	CG5728	FBgn0039182	1	19.87	19.71	20.06	19.58	19.32	19.29	-0.48	0.0076	0.03
CG12076	FBgn0027616	Ythdc1	FBgn0027616	1	19.17	19.46	19.02	18.26	18.86	18.08	-0.82	0.0076	0.03
CG2272	FBgn0030018	slpr	FBgn0030018	1	19.09	19.16	19.14	18.36	18.85	18.58	-0.53	0.0077	0.03
CG8598	FBgn0035766	eco	FBgn0035766	1	18.99	18.89	18.9	18.38	18.61	18.51	-0.43	0.0077	0.03
CG6159	FBgn0266673	Sec10	FBgn0266673	2	18.92	18.29	18.6	19.32	19.23	19.14	0.62	0.0077	0.03
CG9035	FBgn0021795	Tapdelta	FBgn0021795	2	21.93	22.14	22.1	22.56	22.3	22.34	0.35	0.0077	0.03
CG10364	FBgn0027949	msb1l	FBgn0027949	1	20.09	19.97	20.15	19.66	19.74	19.81	-0.34	0.0078	0.03
CG9412	FBgn0015778	rin	FBgn0015778	7	23.51	23.57	23.49	23.72	23.72	23.69	0.18	0.0078	0.03
CG10498	FBgn0004107	Cdk2	FBgn0004107	1	18.86	19.24	18.97	19.41	19.65	19.49	0.49	0.0078	0.03
CG7809	FBgn0036919	Grasp65	FBgn0036919	1	18.15	17.89	17.76	18.31	18.79	18.61	0.64	0.0078	0.03
CG1483	FBgn0002645	Map205	FBgn0002645	9	23.57	23.54	23.59	23.38	23.29	23.41	-0.2	0.0078	0.03
CG12132	FBgn0040236	c11.1	FBgn0040236	2	18.68	17.99	18.36	19.18	18.87	19.09	0.7	0.0079	0.03
CG5899	FBgn0032157	Etl1	FBgn0032157	1	18.16	17.9	18.13	18.45	18.72	18.54	0.51	0.0079	0.031
CG4084	FBgn0011297	Alg3	FBgn0011297	1	17.84	17.38	17.69	17.21	16.26	16.3	-1.05	0.008	0.031
CG7392	FBgn0044323	Cka	FBgn0044323	3	19.22	19.88	18.91	20.12	21.11	20.75	1.33	0.0096	0.035
CG17870	FBgn0004907	14-3-3zeta	FBgn0004907	5	22.32	22.4	22.52	22.64	22.83	22.67	0.3	0.008	0.031
CG8635	FBgn0033317	CG8635	FBgn0033317	3	20.84	20.72	20.81	20.46	20.13	20.51	-0.42	0.008	0.031
CG8289	FBgn0030854	CG8289	FBgn0030854	7	22.92	23.17	22.92	23.24	23.42	23.31	0.32	0.0081	0.031
CG3201	FBgn0004687	Mlc-c	FBgn0004687	3	20.9	20.9	20.92	21.37	21.06	21.33	0.35	0.0081	0.031
CG5581	FBgn0266420	Ote	FBgn0266420	7	22.29	22.37	22.16	22.52	22.6	22.51	0.27	0.0081	0.031
CG13163	FBgn0033712	mIF3	FBgn0033712	2	21.59	21.44	21.58	21.35	21.21	21.15	-0.3	0.0082	0.031
CG12276	FBgn0029512	Aos1	FBgn0029512	4	21.32	21.34	21.34	21.67	21.55	21.53	0.25	0.0082	0.031
CG1676	FBgn0031114	cactin	FBgn0031114	15	24.63	24.61	24.82	24.45	24.35	24.48	-0.26	0.0083	0.032
CG5092	FBgn0021796	Tor	FBgn0021796	1	18.79	18.62	18.68	19.17	18.99	19.18	0.42	0.0083	0.032
CG8549	FBgn0035714	CG8549	FBgn0035714	2	19.98	20.07	20.03	19.5	19.79	19.68	-0.37	0.0084	0.032
CG4016	FBgn0086532	Spt-I	FBgn0086532	3	19.9	20.02	19.99	20.44	20.41	20.17	0.36	0.0084	0.032
CG8939	FBgn0030720	CG8939	FBgn0030720	9	22.7	22.71	22.41	22.92	22.92	22.93	0.32	0.0085	0.032
CG42347	FBgn0259678	sqa	FBgn0259678	1	18.16	18.26	17.77	18.5	18.83	18.69	0.61	0.0086	0.032
CG5827	FBgn0261608	RpL37A	FBgn0261608	1	21.07	21.03	20.98	20.31	20.84	20.51	-0.48	0.0086	0.032
CG4884	FBgn0039565	CG4884	FBgn0039565	4	22.1	22.15	22.19	21.89	21.96	21.92	-0.22	0.0086	0.032
CG9318	FBgn0032880	TM9SF2	FBgn0032880	1	17.62	17.82	17.64	17.15	17.29	17	-0.55	0.0086	0.032
CG11513	FBgn0041164	armi	FBgn0041164	38	25.45	25.42	25.44	25.63	25.57	25.56	0.15	0.0086	0.032
CG4082	FBgn0017577	Mcm5	FBgn0017577	12	23.32	23.35	23.3	23.56	23.5	23.46	0.19	0.0087	0.032
CG42799	FBgn0261934	dikar	FBgn0261934	4	20.74	20.67	20.51	21.09	20.95	20.89	0.33	0.0087	0.032
CG2677	FBgn0024996	eIF2Bbeta	FBgn0024996	5	21.21	21.24	21.21	21.44	21.64	21.44	0.29	0.0088	0.033
CG7757	FBgn0036915	Prp3	FBgn0036915	3	20.21	19.81	20.01	20.47	20.52	20.33	0.43	0.009	0.033
CG9374	FBgn0038167	Lkb1	FBgn0038167	2	20.2	19.99	19.99	20.35	20.38	20.64	0.4	0.009	0.033
CG6988	FBgn0286818	Pdi	FBgn0286818	22	25.68	25.87	25.81	25.58	25.58	25.6	-0.2	0.0091	0.034
CG10423	FBgn0039300	RpS27	FBgn0039300	2	25.23	25.12	25.19	25.35	25.31	25.37	0.16	0.0091	0.034
CG15191	FBgn0000618	e(y)2	FBgn0000618	1	18.28	18.68	18.69	18.95	19.23	19.1	0.55	0.0092	0.034
CG4452	FBgn0035981	CG4452	FBgn0035981	1	20.41	20.05	19.81	19.67	19.18	18.83	-0.87	0.0097	0.035
CG1119	FBgn0004913	Gnf1	FBgn0004913	7	21.82	21.89	21.88	22.1	22.15	22.02	0.23	0.0092	0.034
CG18001	FBgn0040007	RpL38	FBgn0040007	5	28.6	28.71	28.67	28.31	28.53	28.46	-0.22	0.0092	0.034
CG3803	FBgn0034938	CG3803	FBgn0034938	2	19.72	19.61	19.88	20.14	20.01	20.14	0.36	0.0093	0.034
CG6876	FBgn0036487	Prp31	FBgn0036487	6	21.39	21.35	21.44	21.59	21.61	21.68	0.23	0.0093	0.034
CG8208	FBgn0027950	MBD-like	FBgn0027950	1	18.61	18.54	18.62	18.95	18.99	18.93	0.37	0.0095	0.035
CG17642	FBgn0031357	mRpL48	FBgn0031357	1	17.41	16.73	16.18	17.53	18.19	18.13	1.18	0.0096	0.035
CG3192	FBgn0029888	ND-ASHI	FBgn0029888	2	18.09	19.78	18.46	20.41	20.39	20.43	1.63	0.012	0.04
CG11418	FBgn0024360	MTPAP	FBgn0024360	8	23.58	23.58	23.6	23.74	23.81	24.02	0.27	0.0096	0.035
CG34341	FBgn0085370	Pde11	FBgn0085370	1	20.7	20.5	20.66	21.07	20.8	21.09	0.37	0.0097	0.035
CG10306	FBgn0034654	eIF3k	FBgn0034654	8	24.21	24.24	24.31	24.45	24.41	24.41	0.17	0.0098	0.035
CG8722	FBgn0033247	Nup44A	FBgn0033247	4	21.73	21.28	21.41	21.9	21.84	21.89	0.4	0.01	0.036
CG6995	FBgn0039229	Saf-B	FBgn0039229	8	24.78	24.56	24.74	24.37	24.25	24.53	-0.31	0.01	0.036
CG45017	FBgn0283680	IP3K2	FBgn0283680	1	17.99	17.78	17.74	18.51	18.3	18.21	0.5	0.01	0.036
CG3267	FBgn0042083	Mccc2	FBgn0042083	2	19.16	19.15	19.21	19.51	19.49	19.47	0.32	0.01	0.036
CG14884	FBgn0027053	CSN5	FBgn0027053	5	21.16	21.36	21.26	21.45	21.58	21.64	0.29	0.01	0.036
CG12196	FBgn0086908	egg	FBgn0086908	4	18.33	16.58	16.76	19.17	19.65	18.64	1.93	0.012	0.041
CG8430	FBgn0001124	Got1	FBgn0001124	1	17.17	16.76	16.87	16.53	15.73	15.79	-0.92	0.01	0.036
CG10377	FBgn0004838	Hrb27C	FBgn0004838	6	22.26	22.38	22.26	22.45	22.64	22.59	0.26	0.01	0.036
CG8073	FBgn0033377	Pgm2a	FBgn0033377	7	21.84	21.96	21.94	22.32	22.15	22.09	0.28	0.01	0.036
CG2478	FBgn0261787	brun	FBgn0261787	1	18.15	17.71	17.87	17.45	17.22	17.33	-0.57	0.01	0.036
CG5808	FBgn0027617	CG5808	FBgn0027617	10	24.14	24.08	24.05	23.95	23.83	23.92	-0.19	0.01	0.036
CG3564	FBgn0029709	CHOp24	FBgn0029709	2	20.75	20.68	20.72	21.22	20.9	21.04	0.34	0.01	0.036
CG8280	FBgn0284245	eEF1alpha1	FBgn0284245	13	28.82	28.77	28.86	28.68	28.59	28.71	-0.15	0.01	0.036
CG7843	FBgn0033062	Ars2	FBgn0033062	20	24.75	24.63	24.68	25.09	24.81	24.94	0.26	0.01	0.037
CG9353	FBgn0034579	mRpL54	FBgn0034579	2	20.74	20.66	20.79	20.56	20.25	20.3	-0.36	0.01	0.037
CG42281	FBgn0259176	bun	FBgn0259176	2	21.4	21.56	21.42	21.24	21.1	21.22	-0.27	0.011	0.037
CG1910	FBgn0022349	CG1910	FBgn0022349	6	22	22.23	22.06	22.33	22.37	22.37	0.26	0.011	0.037
CG12391	FBgn0033581	CG12391	FBgn0033581	3	20.5	20.42	20.42	20.78	20.64	20.71	0.26	0.011	0.037
CG9330	FBgn0036888	CG9330	FBgn0036888	1	16.86	16.68	16.86	16.31	15.71	16.15	-0.74	0.011	0.037
CG3806	FBgn0023512	eIF2Bepsilon	FBgn0023512	3	20.49	20.66	20.4	20.78	20.92	20.8	0.32	0.011	0.037
CG9752	FBgn0034614	CG9752	FBgn0034614	3	20.99	21.04	21.1	20.83	20.7	20.83	-0.26	0.011	0.037
CG5714	FBgn0000543	ecd	FBgn0000543	4	20.94	20.9	21.01	21.44	21.13	21.25	0.32	0.011	0.037
CG12750	FBgn0086707	ncm	FBgn0086707	13	23.08	23.15	22.9	23.28	23.46	23.27	0.3	0.011	0.038
CG2691	FBgn0030504	CG2691	FBgn0030504	5	23.63	23.63	23.45	23.32	23.39	23.31	-0.23	0.011	0.038
CG3885	FBgn0266669	Sec3	FBgn0266669	1	19.13	19.06	18.87	19.53	19.5	19.28	0.42	0.011	0.038
CG33123	FBgn0284253	LeuRS	FBgn0284253	7	21.15	21.42	21.07	21.53	21.62	21.52	0.34	0.011	0.038
CG10122	FBgn0019938	RpI1	FBgn0019938	13	21.79	21.96	21.94	22.08	22.2	22.16	0.25	0.011	0.038
CG33505	FBgn0053505	U3-55K	FBgn0053505	2	19.87	19.77	19.82	20.07	20.06	20.2	0.29	0.011	0.038
CG7728	FBgn0036686	CG7728	FBgn0036686	2	21.55	21.57	21.57	21.93	21.85	21.7	0.26	0.011	0.039
CG11958	FBgn0015622	Cnx99A	FBgn0015622	9	21.86	22.12	21.84	22.26	22.28	22.17	0.3	0.012	0.04
CG10971	FBgn0036309	Hip1	FBgn0036309	14	25.58	25.54	25.42	25.82	25.75	25.63	0.22	0.012	0.04
CG4742	FBgn0030786	mRpL22	FBgn0030786	2	19.23	19.25	18.93	19.49	19.52	19.61	0.41	0.012	0.04
CG10470	FBgn0032746	CG10470	FBgn0032746	1	17.41	16.92	17.11	14.97	16.17	16.44	-1.29	0.012	0.04
CG7055	FBgn0030093	Bap111	FBgn0030093	1	17.49	17.52	17.71	17.83	18.57	18.45	0.71	0.012	0.04
CG31811	FBgn0028509	CenG1A	FBgn0028509	1	15.63	15.57	15.68	16.36	16.59	16.07	0.71	0.012	0.041
CG5520	FBgn0039562	Gp93	FBgn0039562	12	23.12	23.13	23.26	23.53	23.35	23.36	0.24	0.012	0.041
CG13097	FBgn0032051	CG13097	FBgn0032051	3	21.58	21.61	21.56	22.16	21.89	21.76	0.35	0.012	0.041
CG2275	FBgn0001291	Jra	FBgn0001291	1	15.53	17.22	14.19	17.78	20.21	19.87	3.64	0.015	0.048
CG1639	FBgn0001491	l(1)10Bb	FBgn0001491	2	19.99	20.1	20.12	19.45	19.9	19.58	-0.43	0.012	0.041
CG17665	FBgn0262117	IntS3	FBgn0262117	1	17.05	16.54	16.92	17.78	17.73	17.22	0.74	0.012	0.042
CG2682	FBgn0033015	d4	FBgn0033015	1	17.02	17.12	16.99	17.39	17.66	17.59	0.5	0.012	0.042
CG3696	FBgn0266557	kis	FBgn0266557	6	20.39	20.77	20.49	20.91	20.84	21.03	0.38	0.013	0.042
CG1274	FBgn0040308	Jafrac2	FBgn0040308	4	23.04	23.22	23.23	23.39	23.36	23.41	0.22	0.013	0.043
CG30291	FBgn0050291	CG30291	FBgn0050291	1	18.51	18.19	18.2	18.89	18.68	18.72	0.46	0.013	0.043
CG5877	FBgn0030625	CG5877	FBgn0030625	1	15.53	16.36	14.19	17.44	16.85	17.14	1.78	0.014	0.045
CG18428	FBgn0039149	CG18428	FBgn0039149	2	21.69	21.55	21.79	21.44	21.36	21.44	-0.27	0.013	0.043
CG10903	FBgn0037543	CG10903	FBgn0037543	1	19.41	19.28	19.39	19.03	18.88	19.1	-0.36	0.013	0.043
CG1518	FBgn0031149	Stt3A	FBgn0031149	2	19.71	20.28	19.58	20.42	20.38	20.53	0.58	0.013	0.043
CG3922	FBgn0005533	RpS17	FBgn0005533	6	26.08	25.99	25.91	25.7	25.83	25.84	-0.2	0.013	0.043
CG10955	FBgn0034722	Rtf1	FBgn0034722	3	21.11	21.15	21.09	21.42	21.28	21.34	0.23	0.013	0.044
CG1241	FBgn0044452	Atg2	FBgn0044452	1	19.01	19.1	18.66	19.33	19.39	19.4	0.45	0.013	0.044
CG7010	FBgn0028325	Pdha	FBgn0028325	4	21.37	21.39	21.37	21.58	21.63	21.54	0.21	0.013	0.044
CG13344	FBgn0033884	CG13344	FBgn0033884	1	17.6	17.87	17.58	17.14	17.31	16.99	-0.54	0.013	0.044
CG11777	FBgn0033527	CG11777	FBgn0033527	6	24.82	24.77	24.76	24.31	24.46	24.69	-0.3	0.013	0.044
CG9704	FBgn0004108	Nrt	FBgn0004108	5	20.86	21.15	20.72	21.28	21.34	21.23	0.37	0.013	0.044
CG1527	FBgn0004404	RpS14b	FBgn0004404	7	26.25	26.16	26.17	26.4	26.28	26.5	0.2	0.013	0.044
CG3436	FBgn0031229	CG3436	FBgn0031229	1	20.23	20.37	20.41	20.98	20.62	20.6	0.39	0.013	0.044
CG1828	FBgn0002183	dre4	FBgn0002183	59	31.66	31.61	31.7	31.93	31.73	31.85	0.18	0.014	0.045
CG3613	FBgn0022986	qkr58E-1	FBgn0022986	6	22.55	22.47	22.35	22.64	22.68	22.76	0.24	0.014	0.045
CG14048	FBgn0040389	mRpL14	FBgn0040389	3	22.14	21.75	21.7	21.61	21.34	21.33	-0.44	0.014	0.045
CG43108	FBgn0262568	CG43108	FBgn0262568	1	18.56	19.04	19.18	19.68	19.41	19.43	0.58	0.014	0.045
CG7147	FBgn0259984	kuz	FBgn0259984	3	20.78	20.52	20.95	20.22	20.35	20.47	-0.41	0.014	0.045
CG14999	FBgn0260985	RfC4	FBgn0260985	4	20.42	20.38	20.44	20.74	20.67	20.59	0.25	0.014	0.045
CG6493	FBgn0034246	Dcr-2	FBgn0034246	8	21.42	21.49	21.44	21.71	21.59	21.69	0.22	0.014	0.045
CG4901	FBgn0032194	CG4901	FBgn0032194	1	18.86	19.04	18.84	19.54	19.16	19.33	0.43	0.014	0.046
CG1646	FBgn0039600	CG1646	FBgn0039600	6	21.99	22.07	22.01	22.31	22.16	22.25	0.21	0.014	0.046
CG7698	FBgn0261065	Cpsf73	FBgn0261065	1	18.93	18.66	18.55	19.08	19.16	19.17	0.42	0.014	0.046
CG3642	FBgn0015621	Clp	FBgn0015621	1	18.51	18.9	18.49	17.23	18.22	17.91	-0.85	0.014	0.046
CG10265	FBgn0033990	CG10265	FBgn0033990	2	19.23	19.34	19.57	19.11	18.89	18.85	-0.43	0.014	0.046
CG10279	FBgn0003261	Rm62	FBgn0003261	22	27.9	27.87	27.82	27.52	27.69	27.76	-0.2	0.014	0.046
CG16928	FBgn0020270	mre11	FBgn0020270	6	21.17	21.59	21.52	21.75	21.76	21.86	0.37	0.015	0.047
CG6860	FBgn0032633	Lrch	FBgn0032633	3	20.35	20.54	20.36	20.78	20.66	20.65	0.28	0.015	0.047
CG11999	FBgn0037312	CG11999	FBgn0037312	1	18.32	18.45	18.52	19.13	18.69	18.87	0.47	0.015	0.047
CG2637	FBgn0262743	Fs(2)Ket	FBgn0262743	10	22.34	22.46	22.48	22.65	22.69	22.58	0.21	0.015	0.047
CG2033	FBgn0010198	RpS15Aa	FBgn0010198	2	25.18	25.16	25.11	25.23	25.48	25.42	0.22	0.015	0.047
CG8495	FBgn0261599	RpS29	FBgn0261599	2	28.45	28.28	28.4	28.23	28.17	28.24	-0.16	0.015	0.047
CG17383	FBgn0039350	jigr1	FBgn0039350	1	18.63	18.74	19	19.27	19.21	19.13	0.41	0.015	0.047
CG8427	FBgn0023167	SmD3	FBgn0023167	1	22.33	22.12	22.28	21.86	21.91	22.1	-0.29	0.015	0.047
CG3258	FBgn0000137	ase	FBgn0000137	1	20.37	20.51	20.72	21.25	20.81	20.88	0.45	0.015	0.047
CG15693	FBgn0019936	RpS20	FBgn0019936	4	25.82	25.83	25.72	25.88	26.27	26.3	0.36	0.016	0.049
CG11276	FBgn0011284	RpS4	FBgn0011284	11	26.73	26.82	26.69	26.86	26.91	26.96	0.16	0.015	0.048
CG4281	FBgn0025626	CG4281	FBgn0025626	1	19.54	19.75	19.49	19.12	19.34	19.21	-0.37	0.015	0.048
CG32654	FBgn0052654	Sec16	FBgn0052654	2	20.03	19.91	19.87	20.11	20.33	20.29	0.31	0.015	0.048
CG11098	FBgn0286898	Tango1	FBgn0286898	1	16.85	16.41	16.73	17.6	17.09	17.26	0.65	0.015	0.048
CG16898	FBgn0034480	CG16898	FBgn0034480	1	20.54	20.53	20.58	20.4	20.21	20.25	-0.26	0.016	0.049
CG1513	FBgn0033463	CG1513	FBgn0033463	3	21.02	20.93	21.01	21.44	21.13	21.28	0.3	0.016	0.049
CG8326	FBgn0030851	CG8326	FBgn0030851	4	22.24	22.39	22.31	22.43	22.63	22.65	0.26	0.016	0.049
CG18076	FBgn0013733	shot	FBgn0013733	2	17.46	17.25	17.33	17.91	17.69	17.8	0.45	0.016	0.049
CG12262	FBgn0035811	Mcad	FBgn0035811	10	23.68	23.73	23.82	24.07	23.87	23.94	0.22	0.016	0.05
CG11851	FBgn0039293	Alg9	FBgn0039293	2	19.54	19.41	19.68	20.06	19.72	20.13	0.42	0.016	0.05
CG8963	FBgn0034181	CG8963	FBgn0034181	4	21.56	21.75	21.84	21.5	21.38	21.44	-0.28	0.016	0.05
CG2216	FBgn0015222	Fer1HCH	FBgn0015222	1	19.01	19.09	19.02	18.74	18.66	18.17	-0.52	0.016	0.05
CG3595	FBgn0003514	sqh	FBgn0003514	6	21.15	20.89	21.04	21.29	21.24	21.51	0.32	0.016	0.05
CG9474	FBgn0266720	Snap24	FBgn0266720	1	17.86	17.8	17.77	18.26	18.28	18.08	0.4	0.016	0.05
CG9536	FBgn0031818	CG9536	FBgn0031818	1	20.29	20.43	20.23	20.17	19.78	19.82	-0.39	0.017	0.051
CG10653	FBgn0001202	hook	FBgn0001202	1	17.58	17.85	18.03	18.36	18.26	18.25	0.48	0.017	0.051
CG12244	FBgn0261524	lic	FBgn0261524	4	21.6	21.41	21.56	21.39	21.15	21.17	-0.29	0.017	0.051
CG17255	FBgn0261710	nocte	FBgn0261710	6	22.97	22.93	22.87	22.6	22.46	22.82	-0.3	0.017	0.051
CG6046	FBgn0024491	Bin1	FBgn0024491	2	18.76	19.02	18.52	17.19	18.42	17.78	-0.97	0.017	0.053
CG4916	FBgn0004419	me31B	FBgn0004419	4	21.99	22.07	22.02	22.26	22.21	22.18	0.19	0.017	0.052
CG44193	FBgn0265082	Cdep	FBgn0265082	3	19.09	19.22	19.1	19.53	19.38	19.45	0.31	0.017	0.052
CG8340	FBgn0010339	128up	FBgn0010339	4	24.02	24.34	23.89	22.8	23.69	23.33	-0.81	0.021	0.059
CG5874	FBgn0038872	Nelf-A	FBgn0038872	1	16.75	17	16.73	16.1	16.48	15.78	-0.71	0.017	0.052
CG11376	FBgn0031216	Zir	FBgn0031216	16	23.16	23.06	23.22	23.37	23.3	23.33	0.19	0.017	0.053
CG8443	FBgn0034087	clu	FBgn0034087	3	18.54	18.78	18.64	19.24	18.85	19.26	0.46	0.018	0.053
CG13387	FBgn0020497	emb	FBgn0020497	19	23.52	23.59	23.66	23.78	23.78	23.72	0.17	0.018	0.053
CG5525	FBgn0032444	CCT4	FBgn0032444	12	24.48	24.62	24.67	24.85	24.85	24.7	0.21	0.018	0.053
CG7961	FBgn0025725	alphaCOP	FBgn0025725	24	25.05	25.1	25.06	25.22	25.17	25.21	0.13	0.018	0.054
CG6743	FBgn0027868	Nup107	FBgn0027868	13	23.07	23.02	23.01	23.27	23.18	23.16	0.17	0.018	0.054
CG9748	FBgn0263231	bel	FBgn0263231	28	27.56	27.53	27.48	27.27	27.4	27.42	-0.16	0.018	0.054
CG1017	FBgn0035294	Mfap1	FBgn0035294	4	21.44	21.5	21.53	21.09	21.19	21.38	-0.28	0.018	0.055
CG9543	FBgn0027496	epsilonCOP	FBgn0027496	6	23.16	23.23	23.26	23.57	23.39	23.35	0.22	0.018	0.055
CG2247	FBgn0030320	CG2247	FBgn0030320	1	18.26	18.4	18.1	17.73	17.01	17.86	-0.72	0.018	0.055
CG3198	FBgn0029887	CG3198	FBgn0029887	4	21.56	21.47	21.62	21.76	21.71	21.87	0.23	0.018	0.055
CG9894	FBgn0031453	Bacc	FBgn0031453	4	23.2	23	23.11	23.34	23.31	23.26	0.2	0.019	0.055
CG11274	FBgn0036340	SRm160	FBgn0036340	4	20.72	20.75	20.65	20.89	21.08	20.9	0.25	0.019	0.056
CG3178	FBgn0004584	Rrp1	FBgn0004584	3	19.51	19.79	19.35	19.81	20.14	20	0.43	0.019	0.056
CG9473	FBgn0024330	MED6	FBgn0024330	1	19.73	19.81	19.66	19.36	19.37	19.55	-0.31	0.019	0.056
CG5972	FBgn0284255	Arpc4	FBgn0284255	1	15.53	16.3	14.19	16.64	16.96	17.06	1.55	0.02	0.058
CG9124	FBgn0022023	eIF3h	FBgn0022023	9	24.78	24.76	24.74	24.87	24.87	24.93	0.13	0.019	0.056
CG8625	FBgn0011604	Iswi	FBgn0011604	12	22.76	22.49	22.6	23.01	22.77	22.91	0.28	0.019	0.057
CG14981	FBgn0035473	mge	FBgn0035473	2	19.37	19.43	19.34	19.56	19.77	19.7	0.3	0.019	0.057
CG14450	FBgn0037184	CG14450	FBgn0037184	4	20.66	20.94	20.67	21.21	21.15	20.93	0.34	0.019	0.057
CG11246	FBgn0037121	Rpb8	FBgn0037121	1	20.29	20.45	20.33	20.63	20.53	20.64	0.25	0.019	0.058
CG4825	FBgn0037010	CG4825	FBgn0037010	1	16.88	17.03	16.74	16.09	16.53	16.28	-0.58	0.02	0.058
CG7935	FBgn0026252	msk	FBgn0026252	18	24.12	24.22	24.14	24.45	24.46	24.23	0.22	0.02	0.058
CG9270	FBgn0032908	CG9270	FBgn0032908	1	18.17	18.04	17.98	17.37	17.67	17.76	-0.46	0.02	0.058
CG9020	FBgn0027093	ArgRS	FBgn0027093	6	20.89	20.89	20.95	21.3	21.01	21.32	0.3	0.02	0.058
CG6975	FBgn0005198	gig	FBgn0005198	1	15.89	18.1	17.07	18.39	19.14	18.86	1.78	0.023	0.064
CG9298	FBgn0260861	Trs23	FBgn0260861	2	19.81	19.75	19.93	20.36	19.99	20.19	0.35	0.02	0.058
CG13867	FBgn0034503	MED8	FBgn0034503	2	19.54	19.33	19.68	19.29	19.07	18.93	-0.42	0.02	0.058
CG10622	FBgn0029118	ScsbetaG	FBgn0029118	6	22.03	22.08	22.27	22.5	22.29	22.39	0.27	0.02	0.058
CG31800	FBgn0051800	CG31800	FBgn0051800	1	17.63	17.48	17.48	17.99	17.84	17.97	0.4	0.02	0.058
CG8390	FBgn0259978	vlc	FBgn0259978	3	21.92	21.58	21.72	21.44	21.45	21.49	-0.28	0.02	0.058
CG7752	FBgn0259785	pzg	FBgn0259785	12	24.76	24.78	24.81	25.14	24.86	24.99	0.21	0.02	0.058
CG4069	FBgn0036301	CG4069	FBgn0036301	5	23.09	23.18	23.24	23.02	22.94	23	-0.18	0.02	0.058
CG8490	FBgn0033715	CG8490	FBgn0033715	1	18.95	18.76	18.97	19.44	19.12	19.27	0.38	0.02	0.058
CG6920	FBgn0002906	Blm	FBgn0002906	4	20.43	20.6	20.53	20.83	20.72	20.74	0.24	0.02	0.058
CG6756	FBgn0032397	Tom70	FBgn0032397	8	23.53	23.47	23.55	23.72	23.64	23.66	0.16	0.02	0.058
CG2186	FBgn0030243	CG2186	FBgn0030243	5	21.41	21.41	21.24	21.57	21.54	21.63	0.23	0.02	0.058
CG8266	FBgn0033339	Sec31	FBgn0033339	6	20.97	21.03	21.07	21.45	21.26	21.17	0.27	0.02	0.059
CG11092	FBgn0027537	Nup93-1	FBgn0027537	7	21.85	22.01	21.91	22.28	22.1	22.11	0.24	0.02	0.059
CG1444	FBgn0029975	spidey	FBgn0029975	7	23.35	23.3	23.33	23.63	23.43	23.51	0.19	0.02	0.059
CG2286	FBgn0017566	ND-75	FBgn0017566	13	23.93	24.04	23.94	24.16	24.17	24.08	0.16	0.021	0.059
CG8781	FBgn0033378	tsu	FBgn0033378	3	20	19.8	19.81	20.29	20.06	20.18	0.31	0.021	0.059
CG11606	FBgn0283652	Rpp30	FBgn0283652	1	17.02	13.29	14.19	17.64	17.96	17.94	3.01	0.025	0.067
CG40411	FBgn0010247	Parp	FBgn0010247	1	16.53	16.69	16.36	17.05	17.23	16.91	0.54	0.021	0.059
CG5836	FBgn0025571	SF1	FBgn0025571	3	21.03	21.08	21.09	21.17	21.39	21.48	0.28	0.021	0.059
CG4792	FBgn0039016	Dcr-1	FBgn0039016	2	18.86	18.61	18.89	19.18	19.03	19.31	0.39	0.021	0.059
CG3412	FBgn0283468	slmb	FBgn0283468	6	21.34	21.18	21.16	21.53	21.41	21.45	0.24	0.021	0.06
CG7769	FBgn0260962	pic	FBgn0260962	13	23.11	23.21	23.21	23.53	23.32	23.33	0.22	0.021	0.061
CG8013	FBgn0020887	Su(z)12	FBgn0020887	1	19.21	19.02	19.24	19.48	19.4	19.51	0.31	0.021	0.061
CG6686	FBgn0032388	CG6686	FBgn0032388	18	27	26.89	26.96	26.8	26.82	26.85	-0.13	0.022	0.061
CG8149	FBgn0037700	CG8149	FBgn0037700	2	21.02	20.8	20.64	20.48	20.54	20.5	-0.31	0.022	0.062
CG18214	FBgn0024277	trio	FBgn0024277	11	22.02	22.02	22.04	22.41	22.16	22.21	0.23	0.022	0.062
CG44128	FBgn0264959	Src42A	FBgn0264959	3	18.8	20.07	18.85	20.18	20.27	20.61	1.11	0.025	0.068
CG10712	FBgn0044324	Chro	FBgn0044324	9	23.01	23	23.01	23.14	23.13	23.21	0.15	0.022	0.062
CG5442	FBgn0265298	SC35	FBgn0265298	4	26.77	26.87	26.85	26.71	26.67	26.72	-0.13	0.022	0.063
CG2998	FBgn0030136	RpS28b	FBgn0030136	2	26.95	26.95	27.03	26.92	26.68	26.75	-0.19	0.022	0.063
CG44154	FBgn0265003	koi	FBgn0265003	4	21.7	21.53	21.61	21.46	21.22	21.39	-0.26	0.022	0.063
CG8231	FBgn0027329	CCT6	FBgn0027329	15	25.16	25.26	25.32	25.44	25.38	25.39	0.15	0.022	0.063
CG3664	FBgn0014010	Rab5	FBgn0014010	4	21.77	21.64	21.8	22.15	21.95	21.89	0.26	0.023	0.064
CG3644	FBgn0000181	bic	FBgn0000181	7	24.64	24.69	24.5	24.23	24.46	24.45	-0.23	0.023	0.064
CG5688	FBgn0026432	Grip163	FBgn0026432	1	19.04	18.69	18.95	19.46	19.21	19.2	0.4	0.023	0.064
CG3725	FBgn0263006	SERCA	FBgn0263006	27	25.12	25.21	25.21	25.39	25.27	25.32	0.15	0.023	0.064
CG10988	FBgn0001612	Grip91	FBgn0001612	3	19.65	19.34	18.97	19.88	19.68	19.92	0.51	0.023	0.064
CG11949	FBgn0010434	cora	FBgn0010434	19	24.18	24.15	24.1	24.22	24.34	24.32	0.15	0.023	0.065
CG7097	FBgn0263395	hppy	FBgn0263395	4	20.86	21.14	20.69	21.12	21.36	21.31	0.37	0.023	0.065
CG1987	FBgn0030479	Rbp1-like	FBgn0030479	4	27.4	27.43	27.34	27.11	27.28	27.29	-0.16	0.024	0.065
CG18767	FBgn0042112	mRpL36	FBgn0042112	1	21.84	21.34	21.14	20.98	20.87	21	-0.49	0.024	0.067
CG8801	FBgn0028473	Non1	FBgn0028473	2	20.65	20.69	20.62	20.55	20.32	20.23	-0.28	0.024	0.066
CG2241	FBgn0039788	Rpt6R	FBgn0039788	1	17.09	17.32	17.4	17.06	16.14	16.35	-0.75	0.024	0.066
CG3937	FBgn0014141	cher	FBgn0014141	13	22.22	22.24	22.21	22.37	22.4	22.37	0.16	0.024	0.066
CG14971	FBgn0035449	CG14971	FBgn0035449	6	22.97	22.89	22.96	23.07	23.12	23.09	0.16	0.024	0.066
CG7766	FBgn0030087	CG7766	FBgn0030087	2	18.37	17.96	17.89	18.42	18.86	18.51	0.52	0.024	0.066
CG6474	FBgn0000617	e(y)1	FBgn0000617	1	18.11	18.56	18.42	18.92	18.86	18.65	0.45	0.024	0.066
CG15081	FBgn0010551	Phb2	FBgn0010551	8	23.27	23.55	23.47	23.27	23.18	23.14	-0.23	0.024	0.066
CG10077	FBgn0035720	CG10077	FBgn0035720	6	21.71	21.85	21.84	21.63	21.61	21.58	-0.19	0.024	0.066
CG9946	FBgn0261609	eIF2alpha	FBgn0261609	10	24.51	24.38	24.46	24.71	24.53	24.64	0.18	0.024	0.066
CG6684	FBgn0086472	RpS25	FBgn0086472	5	30.96	30.77	30.82	30.68	30.69	30.74	-0.15	0.024	0.067
CG11622	FBgn0026056	Rlip	FBgn0026056	4	23.21	23.16	23.25	23.12	22.95	23.01	-0.18	0.024	0.067
CG17952	FBgn0034657	LBR	FBgn0034657	9	23.44	23.47	23.44	23.66	23.53	23.64	0.16	0.025	0.067
CG33466	FBgn0259878	Fs	FBgn0259878	1	15.61	13.29	14.19	16.04	15.86	15.84	1.55	0.025	0.067
CG6176	FBgn0026431	Grip75	FBgn0026431	4	21.55	21.35	21.46	22.12	21.68	21.67	0.37	0.025	0.067
CG6884	FBgn0036811	MED11	FBgn0036811	2	20.03	18.45	18.02	20.39	20.56	20.28	1.58	0.03	0.077
CG31249	FBgn0051249	CG31249	FBgn0051249	1	18.18	18.08	18.21	17.79	17.86	17.78	-0.35	0.025	0.067
CG4994	FBgn0026409	Mpcp2	FBgn0026409	7	22.91	23.04	23.09	23.3	23.12	23.25	0.21	0.025	0.067
CG14215	FBgn0031052	Elys	FBgn0031052	2	18.97	19.02	18.68	19.14	19.34	19.29	0.37	0.025	0.068
CG18497	FBgn0016977	spen	FBgn0016977	4	20.53	20.65	20.83	21.01	20.95	20.88	0.27	0.025	0.068
CG1616	FBgn0015929	dpa	FBgn0015929	26	25.17	25.15	25.23	25.47	25.28	25.3	0.17	0.025	0.068
CG10071	FBgn0016726	RpL29	FBgn0016726	1	22.37	20.03	20.77	19.44	19.32	18.89	-1.84	0.031	0.079
CG12499	FBgn0038968	CG12499	FBgn0038968	2	24.92	24.81	24.76	24.95	25.01	24.98	0.15	0.025	0.068
CG4119	FBgn0028474	CG4119	FBgn0028474	16	24.43	24.39	24.46	24.69	24.48	24.64	0.18	0.025	0.068
CG2051	FBgn0037376	Hat1	FBgn0037376	2	20.08	20.2	20.24	20.63	20.4	20.35	0.29	0.025	0.068
CG12052	FBgn0283521	lola	FBgn0283521	2	16.94	16.88	18.85	19.17	19.24	19.12	1.62	0.03	0.077
CG33303	FBgn0053303	CG33303	FBgn0053303	5	22.41	22.33	22.48	22.52	22.6	22.68	0.2	0.026	0.069
CG6058	FBgn0000064	Ald1	FBgn0000064	1	16.91	18.06	17.32	17.98	18.63	18.27	0.87	0.026	0.069
CG7154	FBgn0031947	CG7154	FBgn0031947	2	18.68	19.11	18.52	19.51	19.37	19.04	0.53	0.026	0.069
CG6538	FBgn0010421	TfIIFbeta	FBgn0010421	7	23.08	22.96	22.98	22.76	22.91	22.79	-0.19	0.026	0.069
CG10289	FBgn0035688	fmt	FBgn0035688	4	20.42	20.43	20.52	20.75	20.59	20.69	0.22	0.026	0.07
CG33101	FBgn0266464	Nsf2	FBgn0266464	8	21.43	21.64	21.65	21.86	21.73	21.85	0.24	0.026	0.07
CG5734	FBgn0032191	Snx17	FBgn0032191	1	16.64	17.5	17.71	18.02	18.33	17.9	0.8	0.026	0.07
CG11979	FBgn0033571	Rpb5	FBgn0033571	4	21.37	21.47	21.37	21.6	21.54	21.65	0.19	0.027	0.071
CG11138	FBgn0030400	Pits	FBgn0030400	1	18.07	17.92	17.9	18.24	18.39	18.31	0.35	0.027	0.071
CG40042	FBgn0267976	Tim23	FBgn0267976	1	20.43	20.5	20.49	20.79	20.73	20.59	0.23	0.027	0.071
CG9006	FBgn0086712	Egm	FBgn0086712	5	20.55	20.78	20.89	21.18	21.02	20.95	0.31	0.027	0.072
CG40293	FBgn0046692	Stlk	FBgn0046692	2	20.45	20.6	20.86	21.21	20.9	20.91	0.37	0.027	0.072
CG8478	FBgn0037746	CG8478	FBgn0037746	8	23.34	23	23.17	22.98	22.86	22.91	-0.25	0.028	0.073
CG2050	FBgn0002780	mod	FBgn0002780	13	24.6	24.75	24.69	24.9	24.75	24.92	0.18	0.028	0.073
CG34100	FBgn0263490	mld	FBgn0263490	1	18.56	13.29	14.19	19.63	19.45	19.35	4.13	0.034	0.084
CG12892	FBgn0033526	Caf1-105	FBgn0033526	1	17.61	13.29	14.19	18.38	18.47	18.23	3.33	0.034	0.084
CG1710	FBgn0039904	Hcf	FBgn0039904	1	18.27	18.29	18.26	18.91	18.45	18.68	0.4	0.028	0.073
CG32464	FBgn0013576	mtd	FBgn0013576	1	18.2	18.52	18.25	19.17	18.61	18.7	0.5	0.028	0.073
CG6258	FBgn0028700	RfC38	FBgn0028700	1	19.61	19.63	19.42	19.9	19.77	19.8	0.27	0.028	0.073
CG10067	FBgn0000044	Act57B	FBgn0000044	2	23.56	23.51	23.38	23.27	23.08	23.37	-0.24	0.028	0.074
CG6850	FBgn0014075	Uggt	FBgn0014075	5	20.5	20.42	20.55	20.76	20.62	20.8	0.23	0.028	0.074
CG5258	FBgn0029148	NHP2	FBgn0029148	2	21.67	21.61	21.44	21.91	21.72	21.81	0.24	0.028	0.074
CG4003	FBgn0040078	pont	FBgn0040078	7	22.02	21.81	21.95	22.35	22.16	22.06	0.27	0.028	0.074
CG9633	FBgn0010173	RpA-70	FBgn0010173	10	23.02	23.13	23.13	23.33	23.28	23.19	0.17	0.029	0.075
CG41128	FBgn0069923	CG41128	FBgn0069923	1	21.16	21	21.21	21.43	21.25	21.41	0.24	0.029	0.076
CG33193	FBgn0053193	sav	FBgn0053193	1	17.72	13.29	14.19	17.32	20.13	19.82	4.02	0.036	0.089
CG9862	FBgn0034646	Rae1	FBgn0034646	1	19.85	19.57	19.66	19.17	19.47	19.42	-0.34	0.03	0.077
CG7762	FBgn0028695	Rpn1	FBgn0028695	19	24.62	24.71	24.68	24.91	24.86	24.73	0.16	0.03	0.077
CG12128	FBgn0033473	CG12128	FBgn0033473	1	15.74	15.22	15.5	16.41	15.89	16.15	0.66	0.03	0.077
CG1218	FBgn0037377	CG1218	FBgn0037377	1	17.77	17.66	17.84	18.08	18.06	18.17	0.34	0.03	0.077
CG4211	FBgn0004227	nonA	FBgn0004227	8	21.61	21.38	21.29	21.74	21.58	21.77	0.27	0.03	0.077
CG3714	FBgn0031589	Naprt	FBgn0031589	2	18.62	18.6	19.08	19.21	19.08	19.31	0.43	0.03	0.077
CG12238	FBgn0087008	e(y)3	FBgn0087008	2	23.12	23.28	23.11	23.34	23.38	23.31	0.17	0.03	0.077
CG12848	FBgn0040666	CG12848	FBgn0040666	1	19.14	19.39	19.34	18.89	19.07	18.96	-0.31	0.03	0.078
CG4206	FBgn0284442	Mcm3	FBgn0284442	12	23.98	24.01	24.04	24.17	24.13	24.12	0.13	0.03	0.078
CG34072	FBgn0013673	mt:ATPase8	FBgn0013673	1	21.06	21.06	21.16	20.99	20.84	20.7	-0.25	0.031	0.079
CG30415	FBgn0250838	roh	FBgn0250838	3	23.67	23.79	23.86	23.98	23.92	23.93	0.17	0.031	0.079
CG5670	FBgn0002921	Atpalpha	FBgn0002921	17	23.77	23.88	23.87	24.17	23.97	23.96	0.19	0.031	0.079
CG2522	FBgn0010391	Gtp-bp	FBgn0010391	2	18.68	18.96	18.64	19.12	19.32	18.99	0.38	0.031	0.079
CG30185	FBgn0050185	AIMP3	FBgn0050185	1	19.26	18.9	19.4	19.79	19.4	19.7	0.44	0.031	0.079
CG17064	FBgn0033845	mars	FBgn0033845	4	21.71	21.94	21.76	21.92	22.11	22.12	0.25	0.031	0.08
CG4202	FBgn0029755	Sas10	FBgn0029755	2	20.52	20.46	20.63	20.3	20.39	20.22	-0.23	0.032	0.081
CG8258	FBgn0284436	CCT8	FBgn0284436	18	25.27	25.25	25.31	25.4	25.41	25.36	0.11	0.032	0.082
CG42232	FBgn0250754	CG42232	FBgn0250754	9	22.69	22.77	22.69	22.59	22.49	22.58	-0.16	0.032	0.082
CG1322	FBgn0004606	zfh1	FBgn0004606	3	21.71	21.97	21.84	22.14	22.12	21.97	0.24	0.032	0.082
CG17950	FBgn0004362	HmgD	FBgn0004362	3	24.59	24.04	24.56	23.99	23.96	24.04	-0.4	0.035	0.087
CG6413	FBgn0039183	Dis3	FBgn0039183	13	23.33	23.65	23.65	23.93	23.69	23.87	0.28	0.033	0.082
CG6842	FBgn0283469	Vps4	FBgn0283469	10	23.03	22.68	23.01	23.14	23.13	23.24	0.27	0.033	0.083
CG33094	FBgn0053094	Synd	FBgn0053094	1	16.27	16.3	16.56	17.48	17.48	16.5	0.77	0.033	0.083
CG6189	FBgn0001341	Mybbp1A	FBgn0001341	1	15.36	14.66	14.85	13.62	14.56	12.47	-1.41	0.033	0.083
CG32022	FBgn0052022	CG32022	FBgn0052022	2	18.51	18.5	18.48	18.73	18.74	19.08	0.35	0.033	0.083
CG2986	FBgn0015521	RpS21	FBgn0015521	1	19.96	19.97	19.7	19.04	19.73	19.43	-0.47	0.033	0.084
CG42641	FBgn0261396	Rpn3	FBgn0261396	18	24.69	24.71	24.77	24.91	24.79	24.88	0.14	0.033	0.084
CG6695	FBgn0039215	CG6695	FBgn0039215	1	17.12	17.37	17.23	16.67	16.69	16.99	-0.46	0.034	0.084
CG10149	FBgn0028689	Rpn6	FBgn0028689	13	24.19	24.21	24.21	24.32	24.36	24.29	0.12	0.034	0.085
CG4620	FBgn0004395	unk	FBgn0004395	3	20.61	19.91	20.14	20.79	20.63	20.59	0.45	0.034	0.086
CG18740	FBgn0002783	mor	FBgn0002783	4	20.92	21.09	20.89	21.35	21.21	21.09	0.25	0.034	0.085
CG7855	FBgn0038118	timeout	FBgn0038118	2	19.5	19.57	19.61	20.1	19.73	19.79	0.31	0.034	0.086
CG5495	FBgn0035631	Txl	FBgn0035631	3	21.35	21.4	21.63	21.92	21.58	21.75	0.29	0.035	0.086
CG4063	FBgn0263933	ebi	FBgn0263933	2	20.2	20.28	20.14	20.46	20.42	20.37	0.21	0.035	0.087
CG11989	FBgn0263251	vnc	FBgn0263251	2	18.95	18.78	18.94	19.13	19.2	19.17	0.27	0.035	0.087
CG4453	FBgn0061200	Nup153	FBgn0061200	4	20.25	20.02	20.07	20.36	20.6	20.26	0.3	0.035	0.087
CG32176	FBgn0052176	CG32176	FBgn0052176	1	18.83	18.6	18.7	18.53	18.14	17.48	-0.66	0.035	0.087
CG17912	FBgn0032600	BuGZ	FBgn0032600	3	21.17	21.02	21.13	20.88	19.77	20.49	-0.73	0.039	0.095
CG12298	FBgn0003545	sub	FBgn0003545	1	15.53	16.45	14.19	17.02	16.67	16.71	1.41	0.037	0.091
CG1433	FBgn0019637	Atu	FBgn0019637	1	15.91	15.91	16.03	16.4	16.32	16.58	0.48	0.036	0.088
CG17528	FBgn0261387	CG17528	FBgn0261387	4	20.8	20.56	20.89	20.97	21.02	21.02	0.25	0.036	0.089
CG2260	FBgn0030000	CG2260	FBgn0030000	1	21.72	21.78	21.68	21.91	21.94	21.84	0.17	0.036	0.089
CG4936	FBgn0038768	CG4936	FBgn0038768	1	18.09	18.21	17.93	18.43	18.7	18.29	0.4	0.036	0.089
CG4800	FBgn0037874	Tctp	FBgn0037874	6	22.27	22.49	22.48	22.23	22.15	22.23	-0.2	0.036	0.089
CG12324	FBgn0033555	RpS15Ab	FBgn0033555	1	20.48	20.39	20.41	20.56	20.61	20.7	0.2	0.037	0.09
CG7085	FBgn0267378	sau	FBgn0267378	2	19.42	18.3	18.22	19.27	19.59	19.73	0.88	0.04	0.095
CG8332	FBgn0034138	RpS15	FBgn0034138	5	26.2	26.56	26.36	25.91	26.19	26.17	-0.29	0.039	0.095
CG5499	FBgn0001197	His2Av	FBgn0001197	1	18.91	18.84	18.81	19.36	19.08	19.05	0.31	0.037	0.091
CG7546	FBgn0035793	CG7546	FBgn0035793	2	18.32	18.65	18.44	18.62	18.97	18.98	0.39	0.037	0.091
CG15735	FBgn0030364	Lsm12a	FBgn0030364	1	19.42	19.04	19.32	19.88	19.45	19.61	0.39	0.037	0.091
CG8581	FBgn0011592	fra	FBgn0011592	3	20.65	20.65	20.44	20.93	20.68	20.92	0.26	0.037	0.091
CG8472	FBgn0000253	Cam	FBgn0000253	1	20.06	19.61	19.89	20.11	20.18	20.23	0.32	0.038	0.092
CG33906	FBgn0053906	His2B:CG33906	FBgn0053906	3	24.05	24.6	24.82	25.1	24.87	25.13	0.55	0.044	0.1
CG1064	FBgn0011715	Snr1	FBgn0011715	1	18.59	18.56	18.54	18.83	18.94	18.76	0.28	0.039	0.094
CG8461	FBgn0038235	CG8461	FBgn0038235	4	23.03	23.08	23	23.17	23.21	23.14	0.14	0.039	0.094
CG11198	FBgn0033246	ACC	FBgn0033246	39	24.87	24.9	24.88	25.03	24.98	24.97	0.11	0.039	0.095
CG4944	FBgn0026084	cib	FBgn0026084	2	21.27	21.16	21.12	21.44	21.6	21.26	0.25	0.039	0.095
CG4094	FBgn0286222	Fum1	FBgn0286222	2	20.93	21.04	20.9	20.77	20.76	20.79	-0.18	0.039	0.095
CG5378	FBgn0028688	Rpn7	FBgn0028688	10	24.94	24.81	25.01	25.19	25.03	25.05	0.17	0.04	0.095
CG8547	FBgn0033919	CG8547	FBgn0033919	1	18.09	17.93	17.82	18.89	17.99	18.87	0.63	0.04	0.095
CG30118	FBgn0284257	Ttd14	FBgn0284257	1	18.76	18.4	18.7	18.92	18.98	18.96	0.33	0.04	0.095
CG16944	FBgn0003360	sesB	FBgn0003360	12	28.29	28.34	28.35	28.43	28.39	28.43	0.09	0.04	0.096
CG10212	FBgn0027783	SMC2	FBgn0027783	11	22.42	22.44	22.38	22.61	22.54	22.54	0.15	0.04	0.096
CG10277	FBgn0037442	gzl	FBgn0037442	1	15.78	16.29	16.54	16.83	16.63	16.97	0.61	0.04	0.096
CG31618	FBgn0051618	His2A:CG31618	FBgn0051618	1	20.03	20.34	20	19.21	19.83	19.88	-0.49	0.041	0.097
CG2918	FBgn0023529	CG2918	FBgn0023529	1	18.33	18.69	18.42	18.82	18.98	18.71	0.36	0.04	0.097
CG5931	FBgn0263599	l(3)72Ab	FBgn0263599	17	22.79	22.85	22.78	22.9	22.95	22.97	0.14	0.041	0.097
CG14966	FBgn0035415	CG14966	FBgn0035415	2	19.81	19.87	20.11	19.74	19.49	19.67	-0.3	0.041	0.097
CG5489	FBgn0034366	Atg7	FBgn0034366	1	17.06	17.2	17.15	16.74	16.85	16.13	-0.56	0.041	0.097
CG34163	FBgn0085192	CG34163	FBgn0085192	1	19.29	19.69	19.35	16.55	19.09	17.69	-1.67	0.048	0.11
CG12013	FBgn0035438	PHGPx	FBgn0035438	2	20.79	20.97	21.04	21.23	21.07	21.17	0.22	0.041	0.098
CG2179	FBgn0010772	Xe7	FBgn0010772	1	20.38	20.17	20.07	20.54	20.67	20.33	0.31	0.041	0.098
CG13403	FBgn0030544	CG13403	FBgn0030544	1	15	15.74	15.41	14.56	14.57	14.92	-0.7	0.042	0.098
CG5451	FBgn0038666	Smu1	FBgn0038666	1	17.96	17.55	17.7	18.1	18	18.57	0.49	0.042	0.099
CG9775	FBgn0037261	CG9775	FBgn0037261	3	20.92	21.07	20.9	21.1	21.19	21.19	0.19	0.042	0.099
CG3033	FBgn0029818	GAA1	FBgn0029818	1	17.88	17.65	18.02	18.06	18.27	18.38	0.39	0.042	0.099
CG11120	FBgn0039250	Mink	FBgn0039250	4	20.67	19.96	20.04	20.6	20.73	20.69	0.45	0.042	0.1
CG31739	FBgn0051739	AspRS-m	FBgn0051739	2	19.49	19.58	19.53	19.76	19.82	19.68	0.22	0.042	0.1
CG7439	FBgn0087035	AGO2	FBgn0087035	6	21.58	21.62	21.62	21.84	21.68	21.81	0.17	0.043	0.1
CG5703	FBgn0030853	ND-24	FBgn0030853	8	22.16	22.32	22.25	22.71	22.38	22.39	0.25	0.043	0.1
CG17333	FBgn0030239	CG17333	FBgn0030239	1	15.31	15.88	15.28	14.5	15.19	14.47	-0.77	0.043	0.1
CG1913	FBgn0003884	alphaTub84B	FBgn0003884	13	27.19	27.27	27.31	27.51	27.32	27.37	0.15	0.043	0.1
CG2621	FBgn0003371	sgg	FBgn0003371	1	19.29	19.33	18.94	19.45	19.49	19.59	0.32	0.043	0.1
CG9143	FBgn0034496	CG9143	FBgn0034496	8	21.83	21.99	21.52	21.9	22.23	22.3	0.37	0.044	0.1
CG4609	FBgn0014163	fax	FBgn0014163	3	19.89	20.01	20.05	20.26	20.16	20.17	0.21	0.044	0.1
CG43374	FBgn0263132	Cht6	FBgn0263132	1	19.06	19.21	19.22	19.04	18.79	18.74	-0.31	0.044	0.1
CG1044	FBgn0016794	dos	FBgn0016794	1	17.95	18.13	18.33	18.83	18.65	18.27	0.45	0.044	0.1
CG9526	FBgn0031815	frj	FBgn0031815	1	19.74	19.79	19.69	20.11	19.87	19.94	0.24	0.044	0.1
CG15747	FBgn0030474	CG15747	FBgn0030474	14	25.15	25.22	25.32	25.17	24.92	25.06	-0.18	0.044	0.1
CG6718	FBgn0036053	iPLA2-VIA	FBgn0036053	2	19.88	20.37	20.67	20.9	20.63	20.83	0.48	0.046	0.11
CG9916	FBgn0004432	Cyp1	FBgn0004432	1	18.28	17.89	17.83	17.85	17.25	17.35	-0.52	0.045	0.1
CG10984	FBgn0036305	CG10984	FBgn0036305	4	23.16	23.17	23.52	23.15	22.71	22.96	-0.35	0.046	0.11
CG10506	FBgn0027090	GlnRS	FBgn0027090	1	17.45	17.47	18.02	18.31	18.03	18.02	0.47	0.045	0.1
CG2163	FBgn0005648	Pabp2	FBgn0005648	3	20.31	20.59	20.28	20.6	22.96	22.34	1.57	0.054	0.12
CG10726	FBgn0014127	barr	FBgn0014127	3	19.4	19.33	19.44	19.58	19.76	19.57	0.24	0.045	0.11
CG6693	FBgn0037878	CG6693	FBgn0037878	4	21.78	21.58	21.55	21.76	21.92	21.85	0.21	0.045	0.11
CG31694	FBgn0051694	CG31694	FBgn0051694	6	21.8	21.85	21.93	21.97	22.02	22.08	0.16	0.046	0.11
CG6292	FBgn0025455	CycT	FBgn0025455	9	25.66	25.64	25.72	25.84	25.74	25.77	0.11	0.046	0.11
CG11604	FBgn0086912	mbm	FBgn0086912	4	23.34	23.59	23.23	23.47	23.9	23.76	0.32	0.047	0.11
CG10691	FBgn0002031	l(2)37Cc	FBgn0002031	6	23.1	23.34	23.27	23.12	23.04	23.01	-0.18	0.046	0.11
CG16792	FBgn0000426	SmF	FBgn0000426	1	19.56	19.55	19.66	19.99	19.72	19.82	0.25	0.046	0.11
CG9344	FBgn0034564	CG9344	FBgn0034564	1	15.53	18.72	14.19	18.98	19.2	19.06	2.93	0.055	0.12
CG9769	FBgn0037270	eIF3f1	FBgn0037270	6	24.03	24.04	24.04	24.12	24.19	24.13	0.11	0.047	0.11
CG6512	FBgn0036702	CG6512	FBgn0036702	6	20.9	21.14	21.23	21.44	21.34	21.24	0.25	0.047	0.11
CG6227	FBgn0030631	CG6227	FBgn0030631	2	20.72	21	21.11	21.07	21.34	21.33	0.3	0.047	0.11
CG3821	FBgn0002069	AspRS	FBgn0002069	5	20.15	20.69	20.22	20.86	20.64	20.65	0.36	0.047	0.11
CG4083	FBgn0017572	Mo25	FBgn0017572	5	21.59	21.23	21.04	21.57	21.54	21.8	0.35	0.047	0.11
CG2706	FBgn0000928	fs(1)Yb	FBgn0000928	33	27.48	27.33	27.84	27.24	26.51	27.14	-0.59	0.055	0.12
CG8707	FBgn0033272	RagC-D	FBgn0033272	1	18.12	18.18	18.09	17.6	17.46	18.05	-0.43	0.047	0.11
CG6453	FBgn0032643	GCS2beta	FBgn0032643	7	23.75	23.78	23.83	24.11	23.88	23.9	0.17	0.048	0.11
CG5746	FBgn0039186	CG5746	FBgn0039186	4	25.13	25.29	25.57	25.1	24.98	25.13	-0.26	0.049	0.11
CG9943	FBgn0029117	Surf1	FBgn0029117	1	20.15	19.26	19.49	20.01	20.23	20.28	0.54	0.05	0.11
CG8710	FBgn0033265	coil	FBgn0033265	1	16.34	16.76	16.09	16.89	17	16.84	0.51	0.048	0.11
CG4619	FBgn0032166	CG4619	FBgn0032166	2	20.24	20.2	19.9	19.91	19.87	19.69	-0.29	0.048	0.11
CG32165	FBgn0042178	Apl	FBgn0042178	11	22.03	21.88	22.05	21.71	21.71	21.92	-0.21	0.049	0.11
CG1404	FBgn0020255	Ran	FBgn0020255	9	25.73	25.59	25.62	25.54	25.37	25.56	-0.16	0.049	0.11
CG31352	FBgn0051352	Unc-115a	FBgn0051352	7	21.49	21.52	21.53	21.55	21.76	21.88	0.22	0.049	0.11
CG4581	FBgn0025352	Mtpbeta	FBgn0025352	11	24.34	24.36	24.44	24.69	24.45	24.52	0.17	0.049	0.11
CG10685	FBgn0086447	l(2)37Cg	FBgn0086447	1	15.53	19	14.19	19.92	19.13	19.05	3.13	0.058	0.12
CG11372	FBgn0031213	galectin	FBgn0031213	1	17.84	18.14	17.92	18.52	18.17	18.3	0.36	0.049	0.11
CG6226	FBgn0013269	Fkbp39	FBgn0013269	10	25.36	25.3	25.18	25.37	25.49	25.42	0.14	0.049	0.11
CG10840	FBgn0026259	eIF5B	FBgn0026259	5	20.49	20.38	20.14	20.15	20.05	20.02	-0.26	0.049	0.11
CG1417	FBgn0003423	slgA	FBgn0003423	3	19.72	19.68	19.69	19.93	19.82	19.94	0.2	0.049	0.11
CG1715	FBgn0010808	Chchd3	FBgn0010808	2	20.22	20.49	20.69	20.13	20.22	20.16	-0.3	0.05	0.11
CG10091	FBgn0038020	GstD9	FBgn0038020	1	14.96	14.68	15.15	14.2	14.6	13.69	-0.77	0.05	0.11
CG1634	FBgn0264975	Nrg	FBgn0264975	1	19.39	19.21	19.36	19.28	18.77	18.65	-0.42	0.05	0.11
CG7581	FBgn0025457	Bub3	FBgn0025457	5	22.03	22.13	22.2	21.68	22.03	21.93	-0.24	0.05	0.11
CG42687	FBgn0261573	CoRest	FBgn0261573	1	18.1	18.63	18.45	18.76	18.69	18.84	0.38	0.05	0.11
CG4616	FBgn0033806	FLASH	FBgn0033806	1	17.29	16.76	16.71	17.36	17.57	17.29	0.49	0.05	0.11
CG18619	FBgn0032202	REPTOR-BP	FBgn0032202	1	20.32	20.11	20.17	19.84	20.04	20.01	-0.23	0.05	0.11
CG14476	FBgn0027588	GCS2alpha	FBgn0027588	15	23.57	23.63	23.62	23.87	23.69	23.71	0.15	0.05	0.11
CG17766	FBgn0023510	Rbcn-3B	FBgn0023510	2	19.85	20.03	19.9	19.75	19.75	19.61	-0.22	0.05	0.11
CG5268	FBgn0038387	blp	FBgn0038387	1	16.67	16.61	16.53	16.95	16.93	17.05	0.37	0.05	0.11
CG2774	FBgn0031534	Snx1	FBgn0031534	3	18.49	19.08	18.53	19.29	19.03	19.07	0.43	0.051	0.11
CG1957	FBgn0027873	Cpsf100	FBgn0027873	2	23.72	24.23	23.79	24.12	24.4	24.26	0.35	0.054	0.12
CG12192	FBgn0034827	Klp59D	FBgn0034827	1	15.01	14.8	14.39	12.93	14.18	14.14	-0.98	0.051	0.11
CG5001	FBgn0031322	CG5001	FBgn0031322	1	25.3	25.12	25.16	25	25.09	25.08	-0.14	0.051	0.11
CG6543	FBgn0033879	Echs1	FBgn0033879	6	23.3	23.38	23.3	23.55	23.58	23.36	0.17	0.052	0.11
CG3523	FBgn0283427	FASN1	FBgn0283427	48	26.14	26.14	26.17	26.31	26.23	26.21	0.1	0.052	0.11
CG2199	FBgn0035213	CG2199	FBgn0035213	7	23.85	23.9	23.76	23.86	24.27	24.11	0.24	0.052	0.11
CG30021	FBgn0050021	metro	FBgn0050021	1	21.4	21.7	21.64	21.82	21.78	21.78	0.21	0.052	0.11
CG4338	FBgn0038313	CG4338	FBgn0038313	2	21.12	21.11	21.31	20.97	20.87	21.06	-0.21	0.052	0.11
CG40045	FBgn0058045	CG40045	FBgn0058045	1	18.5	18.97	19.02	18.99	19.39	19.41	0.43	0.052	0.11
CG10281	FBgn0010282	TfIIFalpha	FBgn0010282	8	23.08	23.03	22.94	22.96	22.79	22.8	-0.16	0.052	0.11
CG2101	FBgn0035374	mRpS35	FBgn0035374	2	20	19.93	20.21	19.35	19.91	19.76	-0.37	0.052	0.11
CG14145	FBgn0036118	Blos2	FBgn0036118	4	22.58	22.86	22.75	23.01	22.83	22.97	0.21	0.052	0.11
CG5813	FBgn0000307	chif	FBgn0000307	1	19.18	19.2	19.37	19.58	19.34	19.7	0.29	0.053	0.12
CG15707	FBgn0034098	krimp	FBgn0034098	3	20.51	20.38	20.61	20.88	20.78	20.59	0.24	0.053	0.12
CG6782	FBgn0037912	sea	FBgn0037912	9	25.02	25.1	25.05	25.19	25.13	25.16	0.1	0.054	0.12
CG8771	FBgn0033766	Nup188	FBgn0033766	23	23.98	23.94	23.95	24.16	24.05	24.03	0.12	0.054	0.12
CG9797	FBgn0037621	M1BP	FBgn0037621	2	20.53	20.35	20.41	20.64	20.65	20.57	0.19	0.054	0.12
CG9888	FBgn0003062	Fib	FBgn0003062	16	28.48	28.42	28.36	28.23	28.35	28.35	-0.11	0.054	0.12
CG1512	FBgn0032956	Cul2	FBgn0032956	1	18.11	13.29	14.19	18.39	18.1	18.34	3.08	0.064	0.13
CG5033	FBgn0028744	CG5033	FBgn0028744	2	19.18	18.64	19.27	19.47	19.73	21.02	1.04	0.062	0.13
CG31651	FBgn0031681	Pgant5	FBgn0031681	2	19.35	19.07	19.4	19.92	19.35	19.71	0.38	0.055	0.12
CG7438	FBgn0086347	Myo31DF	FBgn0086347	4	19.82	19.6	19.81	20.5	19.77	20.23	0.42	0.055	0.12
CG15027	FBgn0030611	CG15027	FBgn0030611	3	21.05	21.04	21.15	20.78	20.97	20.92	-0.19	0.055	0.12
CG14230	FBgn0031062	CG14230	FBgn0031062	4	21.98	22	22.34	21.95	21.72	21.85	-0.26	0.055	0.12
CG17896	FBgn0023537	CG17896	FBgn0023537	3	21	21.09	21.22	21.32	21.24	21.31	0.18	0.055	0.12
CG8409	FBgn0003607	Su(var)205	FBgn0003607	2	20.53	20.32	20.36	20.65	20.58	20.57	0.2	0.055	0.12
CG2685	FBgn0024998	CG2685	FBgn0024998	2	19.4	19.43	19.27	19.39	20.05	19.82	0.39	0.055	0.12
CG4268	FBgn0016696	Pitslre	FBgn0016696	22	24.99	25.01	25.01	25.09	25.09	25.11	0.09	0.055	0.12
CG1633	FBgn0040309	Jafrac1	FBgn0040309	5	24.34	24.35	24.49	24.68	24.45	24.57	0.17	0.056	0.12
CG12005	FBgn0037301	Mms19	FBgn0037301	2	20.09	19.9	19.99	19.67	19.62	19.93	-0.26	0.056	0.12
CG6767	FBgn0036030	CG6767	FBgn0036030	5	21.51	22.01	21.31	22.02	21.99	21.99	0.39	0.058	0.12
CG7654	FBgn0036928	Tom20	FBgn0036928	3	21.09	21.04	21.09	21.11	21.34	21.42	0.21	0.056	0.12
CG6773	FBgn0024509	Sec13	FBgn0024509	2	21.44	21.36	21.4	21.56	21.54	21.53	0.14	0.056	0.12
CG6700	FBgn0032305	CG6700	FBgn0032305	5	22.55	22.45	22.41	22.32	22.36	22.28	-0.15	0.057	0.12
CG6554	FBgn0037834	Art1	FBgn0037834	4	20.69	20.42	20.61	20.47	20.31	20.17	-0.25	0.057	0.12
CG11984	FBgn0037655	Kcmf1	FBgn0037655	1	15.32	15.53	15.28	15.73	16.15	15.77	0.51	0.057	0.12
CG42273	FBgn0259168	mnb	FBgn0259168	1	16.14	16.16	16.31	16.81	16.39	16.73	0.44	0.057	0.12
CG12608	FBgn0030630	CG12608	FBgn0030630	5	23.86	23.89	23.96	23.71	23.83	23.79	-0.13	0.057	0.12
CG12230	FBgn0000257	car	FBgn0000257	1	17.31	17.11	16.83	17.55	17.29	17.74	0.44	0.058	0.12
CG17168	FBgn0039943	CG17168	FBgn0039943	14	25.59	25.56	25.61	25.38	25.45	25.56	-0.12	0.058	0.12
CG5575	FBgn0011236	ken	FBgn0011236	1	18.13	18.61	18.13	17.79	18	17.91	-0.38	0.058	0.12
CG33180	FBgn0053180	Ranbp16	FBgn0053180	4	20.35	20.32	20.37	20.62	20.49	20.46	0.18	0.059	0.12
CG14217	FBgn0031030	Tao	FBgn0031030	12	23.51	23.47	23.59	23.58	23.67	23.75	0.14	0.059	0.12
CG7692	FBgn0036714	CG7692	FBgn0036714	19	24.25	24.41	24.22	24.88	24.48	24.4	0.29	0.062	0.13
CG3967	FBgn0035989	Tat	FBgn0035989	2	19.56	19.56	19.67	19.34	19.24	19.5	-0.24	0.06	0.13
CG5289	FBgn0015282	Rpt2	FBgn0015282	8	23.63	23.72	23.66	23.8	23.76	23.78	0.11	0.06	0.13
CG7639	FBgn0033989	CG7639	FBgn0033989	2	19.04	18.91	19.1	18.87	18.75	18.66	-0.26	0.06	0.13
CG1883	FBgn0039757	RpS7	FBgn0039757	10	27.77	27.67	27.68	27.5	27.63	27.65	-0.12	0.061	0.13
CG6932	FBgn0028837	CSN6	FBgn0028837	6	22.41	22.33	22.27	22.52	22.46	22.46	0.14	0.061	0.13
CG8344	FBgn0004463	RpIII128	FBgn0004463	1	17.16	17.41	17.87	18.08	17.86	17.87	0.46	0.061	0.13
CG8611	FBgn0027602	CG8611	FBgn0027602	3	20.61	20.8	20.59	20.6	20.15	20.39	-0.29	0.061	0.13
CG4466	FBgn0001226	Hsp27	FBgn0001226	2	19.76	19.82	19.64	20	19.94	19.89	0.2	0.061	0.13
CG5219	FBgn0036990	mRpL15	FBgn0036990	1	18.8	18.83	19.12	18.56	18.57	18.74	-0.29	0.061	0.13
CG3520	FBgn0034859	CG3520	FBgn0034859	1	15.53	16.04	14.19	16.75	16.32	15.91	1.07	0.062	0.13
CG32701	FBgn0028327	l(1)G0320	FBgn0028327	1	19.18	19.41	19.26	18.44	19.31	18.63	-0.49	0.062	0.13
CG14895	FBgn0044826	Pak3	FBgn0044826	1	17.85	17.82	17.22	18.11	18.02	18.06	0.43	0.062	0.13
CG9606	FBgn0030789	Rrp45	FBgn0030789	2	20.64	20.42	20.3	20.03	20.14	20.36	-0.28	0.062	0.13
CG9075	FBgn0001942	eIF4A	FBgn0001942	10	23.95	24.02	23.99	23.94	23.86	23.81	-0.12	0.062	0.13
CG3760	FBgn0022343	CG3760	FBgn0022343	4	22.65	22.55	22.63	22.5	22.43	22.5	-0.13	0.062	0.13
CG42863	FBgn0265988	mv	FBgn0265988	1	18.99	18.74	19.17	19.25	19.39	19.18	0.31	0.063	0.13
CG6843	FBgn0036827	CG6843	FBgn0036827	1	18.4	18.63	18.07	18.72	18.99	18.59	0.4	0.063	0.13
CG8156	FBgn0013750	Arf51F	FBgn0013750	1	17	17.1	16.76	16.42	16.82	16.01	-0.54	0.063	0.13
CG10473	FBgn0263198	Acn	FBgn0263198	8	24.21	24.21	24.16	24.23	24.32	24.4	0.13	0.063	0.13
CG2093	FBgn0033194	Vps13	FBgn0033194	7	21.03	21.03	21.15	20.92	20.89	20.91	-0.16	0.063	0.13
CG2790	FBgn0027599	CG2790	FBgn0027599	3	21.39	21.55	21.54	21.36	21.36	21.27	-0.16	0.063	0.13
CG5726	FBgn0034313	CG5726	FBgn0034313	8	22.98	22.91	22.82	23.14	23.16	22.94	0.18	0.064	0.13
CG4622	FBgn0035021	CG4622	FBgn0035021	1	19.36	19.54	19.66	20	19.74	19.67	0.28	0.064	0.13
CG9553	FBgn0000308	chic	FBgn0000308	1	20.37	20.44	20.42	20.28	20.16	20.27	-0.17	0.064	0.13
CG8038	FBgn0035831	CG8038	FBgn0035831	1	16.47	16.44	16.41	16.92	16.67	16.85	0.37	0.064	0.13
CG9336	FBgn0032897	CG9336	FBgn0032897	1	17.49	17.69	17.49	17.15	17.14	17.37	-0.34	0.064	0.13
CG33217	FBgn0053217	CG33217	FBgn0053217	1	17.56	17.59	17.82	15.56	17.17	17.24	-1	0.067	0.14
CG5254	FBgn0040383	CG5254	FBgn0040383	1	18.49	18.61	18.22	18.93	18.64	18.74	0.33	0.064	0.13
CG9320	FBgn0032882	Ns4	FBgn0032882	1	17.57	17.98	17.59	18.02	18.07	18.07	0.34	0.065	0.13
CG3917	FBgn0026430	Grip84	FBgn0026430	4	20.67	20.71	21.01	21.19	20.99	20.96	0.25	0.065	0.13
CG6214	FBgn0032456	MRP	FBgn0032456	12	22.29	22.41	22.43	22.6	22.51	22.47	0.15	0.065	0.13
CG34438	FBgn0259876	Cap-G	FBgn0259876	2	17.06	17.67	17.77	18.04	17.79	18.06	0.47	0.066	0.13
CG8184	FBgn0030674	HUWE1	FBgn0030674	1	18.05	16.87	17.38	19.14	17.72	18.35	0.97	0.071	0.14
CG4299	FBgn0014879	Set	FBgn0014879	1	20.38	20.33	20.22	19.85	19.74	20.33	-0.34	0.066	0.13
CG31842	FBgn0260407	mRpS23	FBgn0260407	1	18.81	19.16	19.25	19.33	19.47	19.33	0.3	0.066	0.14
CG6330	FBgn0039464	CG6330	FBgn0039464	1	16.18	16.1	16.23	15.88	15.56	15.79	-0.43	0.067	0.14
CG3157	FBgn0260639	gammaTub23C	FBgn0260639	9	23.01	23	22.93	23.27	23.02	23.13	0.16	0.067	0.14
CG1561	FBgn0030317	CG1561	FBgn0030317	1	17.01	17.36	16.8	14.56	16.58	16.45	-1.19	0.071	0.14
CG8306	FBgn0034142	CG8306	FBgn0034142	3	20.61	20.33	20.26	20.19	20.25	19.84	-0.31	0.068	0.14
CG1967	FBgn0030341	p24-1	FBgn0030341	1	17.73	17.82	17.66	18.25	18.03	17.88	0.32	0.068	0.14
CG11180	FBgn0034528	CG11180	FBgn0034528	2	18.22	18.5	18.51	18.94	18.94	18.46	0.37	0.068	0.14
CG14200	FBgn0031023	CG14200	FBgn0031023	1	15.64	15.61	15.48	16	16.17	15.86	0.43	0.068	0.14
CG2904	FBgn0000542	ec	FBgn0000542	1	17.81	18.09	17.93	18.1	18.26	18.39	0.31	0.068	0.14
CG4882	FBgn0025336	CG4882	FBgn0025336	3	20.41	20.39	20.34	20.34	20.08	20.11	-0.21	0.068	0.14
CG5949	FBgn0263600	DNApol-delta	FBgn0263600	1	17.24	17.21	17.08	17.3	17.61	17.66	0.35	0.069	0.14
CG5902	FBgn0039136	CG5902	FBgn0039136	1	19.12	18.91	19.23	18.68	18.86	18.89	-0.28	0.069	0.14
CG5651	FBgn0086706	pix	FBgn0086706	1	16.04	16.22	16.43	16.63	17	16.46	0.47	0.07	0.14
CG17785	FBgn0039188	Golgin84	FBgn0039188	2	19.61	19.66	19.59	19.86	19.72	19.86	0.19	0.07	0.14
CG5316	FBgn0038704	CG5316	FBgn0038704	1	17.08	17.1	17.06	16.9	16.48	16.74	-0.37	0.07	0.14
CG14814	FBgn0023515	CG14814	FBgn0023515	1	18.59	18.84	18.35	18.31	18.08	18.36	-0.35	0.07	0.14
CG6050	FBgn0024556	mEFTu1	FBgn0024556	12	24.08	24.15	24.17	24.02	24.06	24.01	-0.1	0.071	0.14
CG6904	FBgn0266064	GlyS	FBgn0266064	1	18.68	18.48	18.84	19.84	18.69	19.28	0.6	0.073	0.14
CG7619	FBgn0015283	Rpn10	FBgn0015283	5	25.65	25.54	25.55	25.46	25.5	25.49	-0.1	0.071	0.14
CG3680	FBgn0037027	HIPP1	FBgn0037027	2	19.48	19.34	19.37	19.46	19.7	19.75	0.24	0.071	0.14
CG4972	FBgn0032217	CG4972	FBgn0032217	3	19.37	20.12	19.95	20.27	20.27	20.12	0.4	0.072	0.14
CG12756	FBgn0035624	Eaf6	FBgn0035624	1	18.35	13.29	14.19	17.9	18.2	18.71	2.99	0.083	0.16
CG6523	FBgn0032509	CG6523	FBgn0032509	1	17.36	17.6	17.53	16.66	17.39	17.09	-0.45	0.072	0.14
CG8183	FBgn0019968	Khc-73	FBgn0019968	51	29.39	29.37	29.4	29.66	29.39	29.51	0.14	0.072	0.14
CG32016	FBgn0052016	4E-T	FBgn0052016	1	18.25	18.28	18.47	18.56	18.53	18.69	0.26	0.073	0.14
CG5028	FBgn0039358	CG5028	FBgn0039358	2	19.42	19.7	19.81	19.84	19.98	19.88	0.26	0.073	0.14
CG8749	FBgn0016978	snRNP-U1-70K	FBgn0016978	6	24.89	24.83	24.62	24.92	25	24.9	0.16	0.074	0.15
CG6699	FBgn0025724	beta'COP	FBgn0025724	18	24.69	24.66	24.71	24.85	24.75	24.77	0.1	0.074	0.15
CG34414	FBgn0085443	spri	FBgn0085443	1	18.69	18.85	19.06	19.04	19.23	19.15	0.27	0.075	0.15
CG5183	FBgn0267330	KdelR	FBgn0267330	2	19.87	20.19	19.9	19.08	19.91	19.63	-0.45	0.076	0.15
CG1240	FBgn0035370	Non2	FBgn0035370	5	26.84	26.85	26.91	26.76	26.74	26.83	-0.09	0.075	0.15
CG6664	FBgn0036685	CG6664	FBgn0036685	2	19.17	19.42	19.49	19.81	19.44	19.7	0.29	0.076	0.15
CG9004	FBgn0035336	CG9004	FBgn0035336	1	19.81	20.02	20.01	20.18	20.29	20.03	0.22	0.076	0.15
CG12404	FBgn0032465	Yip1d1	FBgn0032465	1	19.87	20.1	20.01	20.62	20.05	20.25	0.31	0.077	0.15
CG7338	FBgn0037073	Tsr1	FBgn0037073	2	20.35	20.29	20.13	20.4	20.39	20.56	0.2	0.077	0.15
CG9958	FBgn0031455	Snapin	FBgn0031455	4	22.3	22.33	22.32	22.55	22.42	22.39	0.14	0.077	0.15
CG18596	FBgn0038953	CG18596	FBgn0038953	2	18.27	18.28	18.67	18.69	18.67	18.76	0.3	0.077	0.15
CG4091	FBgn0034894	sigmar	FBgn0034894	3	20.93	20.95	21.05	20.77	20.88	20.82	-0.16	0.077	0.15
CG11001	FBgn0013954	Fkbp12	FBgn0013954	1	18.98	13.29	14.19	18.8	18.75	18.7	3.26	0.089	0.17
CG8189	FBgn0019644	ATPsynB	FBgn0019644	7	24.45	24.59	24.56	24.72	24.63	24.6	0.12	0.078	0.15
CG32344	FBgn0052344	CG32344	FBgn0052344	6	22.11	22.24	21.98	22.12	22.62	22.4	0.27	0.078	0.15
CG6801	FBgn0011335	vers	FBgn0011335	1	18.97	18.88	18.79	19.3	19.02	19.08	0.25	0.078	0.15
CG43443	FBgn0263391	hts	FBgn0263391	13	24.17	24.2	24.18	24.08	24.04	24.13	-0.1	0.078	0.15
CG5543	FBgn0034908	CG5543	FBgn0034908	1	19.03	18.54	18.65	18.5	18.29	18.44	-0.33	0.078	0.15
CG5170	FBgn0027835	Dp1	FBgn0027835	11	22.51	22.5	22.39	22.62	22.55	22.6	0.13	0.079	0.15
CG3654	FBgn0036004	Jarid2	FBgn0036004	1	17.13	17.26	17.16	17.42	17.63	17.41	0.3	0.079	0.15
CG1490	FBgn0030366	Usp7	FBgn0030366	2	18.99	18.49	18.61	19	18.94	19.1	0.31	0.08	0.16
CG9209	FBgn0003969	vap	FBgn0003969	4	20.53	20.56	20.59	20.69	20.66	20.76	0.15	0.08	0.16
CG8680	FBgn0031684	ND-13A	FBgn0031684	1	18.81	19.52	19.49	19.56	19.7	19.76	0.4	0.081	0.16
CG3869	FBgn0029870	Marf	FBgn0029870	1	16.66	16.56	16.04	16.77	17.17	16.75	0.48	0.082	0.16
CG2972	FBgn0030177	CG2972	FBgn0030177	1	18.01	17.93	18.3	17.52	17.95	17.72	-0.35	0.082	0.16
CG7507	FBgn0261797	Dhc64C	FBgn0261797	37	23.86	23.92	23.96	24.05	24.04	23.96	0.11	0.083	0.16
CG6311	FBgn0036735	Edc3	FBgn0036735	4	20.68	20.57	20.52	20.27	20.45	20.49	-0.19	0.083	0.16
CG15611	FBgn0034194	CG15611	FBgn0034194	2	19.1	19.54	19.11	19.38	19.61	19.72	0.32	0.083	0.16
CG3593	FBgn0003257	r-l	FBgn0003257	1	16.02	16.33	15.89	15.26	16.03	15.21	-0.58	0.083	0.16
CG6443	FBgn0032290	CG6443	FBgn0032290	1	16.05	16.08	15.87	16.41	16.34	16.34	0.37	0.084	0.16
CG17233	FBgn0036958	CG17233	FBgn0036958	1	16.23	16.62	16.62	17.01	16.79	16.82	0.38	0.084	0.16
CG9762	FBgn0011455	ND-SGDH	FBgn0011455	3	21.17	21.33	21.4	21.68	21.61	21.31	0.23	0.084	0.16
CG6638	FBgn0035911	CG6638	FBgn0035911	1	18.04	17.9	18.15	19.03	18.12	18.36	0.47	0.084	0.16
CG31650	FBgn0031673	CG31650	FBgn0031673	2	19.5	19.46	19.38	19.66	19.65	19.57	0.18	0.085	0.16
CG31719	FBgn0051719	RluA-1	FBgn0051719	1	19.03	18.77	18.74	18.56	18.33	18.74	-0.3	0.086	0.16
CG10522	FBgn0002466	sti	FBgn0002466	2	19.67	18.29	18.04	19.56	19.47	19.56	0.86	0.094	0.18
CG31342	FBgn0051342	CG31342	FBgn0051342	1	17.91	17.46	17.48	17.22	16.4	17.47	-0.59	0.086	0.17
CG11980	FBgn0037652	CG11980	FBgn0037652	4	20.01	20.14	20.01	19.95	19.9	19.67	-0.21	0.087	0.17
CG10880	FBgn0031398	daed	FBgn0031398	1	20.37	20.26	20.12	20.48	20.43	20.38	0.18	0.088	0.17
CG34073	FBgn0013672	mt:ATPase6	FBgn0013672	1	17.08	17.69	17.52	16.65	17.24	17.02	-0.46	0.089	0.17
CG11793	FBgn0003462	Sod1	FBgn0003462	2	21.78	21.89	21.88	21.76	21.75	21.58	-0.15	0.089	0.17
CG10535	FBgn0037926	Elp1	FBgn0037926	11	22.25	22.31	22.33	22.44	22.35	22.46	0.12	0.089	0.17
CG9246	FBgn0032925	CG9246	FBgn0032925	3	18.76	19.12	19.23	19.22	19.44	19.33	0.29	0.089	0.17
CG10198	FBgn0039120	Nup98-96	FBgn0039120	10	21.12	21.27	21.12	21.17	21.5	21.49	0.21	0.09	0.17
CG6155	FBgn0014877	Roe1	FBgn0014877	1	17.84	18.39	17.44	18.51	18.82	18.03	0.57	0.091	0.17
CG10646	FBgn0036292	CG10646	FBgn0036292	1	17.2	17.63	17.58	17.89	17.73	17.76	0.32	0.09	0.17
CG4618	FBgn0035589	CHMP2B	FBgn0035589	2	21.1	20.91	21.07	20.69	20.89	20.93	-0.19	0.091	0.17
CG5161	FBgn0266724	Trs20	FBgn0266724	1	17.81	17.63	17.68	16.74	17.18	17.72	-0.49	0.091	0.17
CG3909	FBgn0027524	CG3909	FBgn0027524	1	19.29	19.23	19.23	19.42	19.37	19.51	0.19	0.092	0.17
CG42314	FBgn0259214	PMCA	FBgn0259214	1	18.88	18.81	19.13	19.32	19.1	19.16	0.25	0.092	0.17
CG5333	FBgn0038055	trus	FBgn0038055	2	19.69	19.76	19.63	19.92	19.96	19.76	0.19	0.092	0.17
CG13425	FBgn0267791	HnRNP-K	FBgn0267791	5	21.32	21.43	21.25	21.32	21.7	21.64	0.22	0.093	0.17
CG17342	FBgn0017581	Lk6	FBgn0017581	2	19.49	19.71	19.59	19.34	19.5	19.33	-0.21	0.093	0.18
CG4168	FBgn0028888	CG4168	FBgn0028888	1	19.34	19.9	19.79	18.2	19.66	18.94	-0.74	0.1	0.19
CG6444	FBgn0032293	Dpy-30L1	FBgn0032293	1	16.85	15.3	15.18	14.69	15.16	14.82	-0.88	0.094	0.18
CG3800	FBgn0034802	CNBP	FBgn0034802	4	22.49	22.43	22.47	22.24	22.19	22.47	-0.16	0.094	0.18
CG13625	FBgn0039210	CG13625	FBgn0039210	3	22.98	22.39	22.28	22.95	22.81	22.97	0.36	0.1	0.18
CG1969	FBgn0039690	Gnpnat	FBgn0039690	2	18.5	18.77	18.69	18.44	18.4	18.4	-0.24	0.095	0.18
CG4866	FBgn0034232	CG4866	FBgn0034232	1	15.77	17	16.4	16.56	17.17	17.8	0.79	0.096	0.18
CG3710	FBgn0010422	TfIIS	FBgn0010422	4	22.83	22.57	22.48	22.48	22.46	22.38	-0.19	0.095	0.18
CG9999	FBgn0003346	RanGAP	FBgn0003346	5	21.49	21.68	21.9	22.03	21.84	21.87	0.22	0.095	0.18
CG8177	FBgn0036043	CG8177	FBgn0036043	2	19.58	19.6	19.46	19.44	19.38	19.2	-0.2	0.096	0.18
CG6984	FBgn0034191	CG6984	FBgn0034191	1	20.4	20.51	20.45	20.71	20.57	20.55	0.16	0.096	0.18
CG8671	FBgn0032938	CG8671	FBgn0032938	1	17.54	18.08	17.96	18.09	18.53	18.1	0.38	0.096	0.18
CG1316	FBgn0035526	CG1316	FBgn0035526	2	19.35	19.35	19.01	19.54	19.36	19.57	0.25	0.097	0.18
CG4978	FBgn0020633	Mcm7	FBgn0020633	23	24.92	24.92	24.96	25.04	25	25	0.08	0.097	0.18
CG11173	FBgn0034913	Snap29	FBgn0034913	2	20.03	20.42	20.01	20.31	20.35	20.64	0.28	0.097	0.18
CG13472	FBgn0036450	Tdrd3	FBgn0036450	1	18.09	18.22	18.28	17.94	17.83	18.05	-0.25	0.098	0.18
CG1810	FBgn0030556	mRNA-cap	FBgn0030556	1	18.73	18.61	18.51	17.99	18.58	18.3	-0.33	0.099	0.18
CG8186	FBgn0022097	Vha36-1	FBgn0022097	4	22.21	22.25	22.17	22.44	22.35	22.24	0.14	0.099	0.18
CG7686	FBgn0027525	LTV1	FBgn0027525	3	21.95	21.93	21.92	22.04	22.54	22.01	0.27	0.1	0.19
CG12010	FBgn0035443	CG12010	FBgn0035443	6	22.01	22.07	22.03	22.31	22.05	22.22	0.15	0.1	0.19
CG10153	FBgn0266723	Trs31	FBgn0266723	3	20.31	20.31	20.43	20.58	20.37	20.65	0.18	0.1	0.19
CG1109	FBgn0046222	Wdr33	FBgn0046222	1	15.53	17.39	14.19	17.28	17.2	17.11	1.49	0.11	0.2
CG7145	FBgn0037138	P5CDh1	FBgn0037138	8	21.95	21.84	21.98	21.93	22.33	22.93	0.47	0.11	0.2
CG9126	FBgn0045073	Stim	FBgn0045073	3	20.34	20.16	20.04	20.36	20.39	20.34	0.18	0.1	0.19
CG12917	FBgn0033490	CG12917	FBgn0033490	1	15.53	13.29	19.08	18.81	18.56	18.97	2.81	0.12	0.21
CG1422	FBgn0040087	p115	FBgn0040087	5	19.96	20.1	20.2	20.46	20.32	20.13	0.21	0.1	0.19
CG15845	FBgn0284249	Adf1	FBgn0284249	2	20.51	20.52	20.45	20.79	20.7	20.51	0.17	0.1	0.19
CG16757	FBgn0010905	Spn	FBgn0010905	12	24.07	24.15	24.17	24.22	24.27	24.19	0.1	0.1	0.19
CG7137	FBgn0034422	CG7137	FBgn0034422	1	18.62	18.63	18.58	18.61	19.15	18.94	0.29	0.11	0.19
CG7872	FBgn0030658	CG7872	FBgn0030658	2	19.59	19.57	19.66	20.02	19.63	19.83	0.22	0.11	0.19
CG17903	FBgn0284248	Cyt-c-p	FBgn0284248	4	21.01	21.09	20.97	20.63	20.9	20.96	-0.19	0.11	0.19
CG32149	FBgn0036518	RhoGAP71E	FBgn0036518	1	18.04	18.06	18.13	18.13	18.47	18.38	0.25	0.11	0.19
CG31605	FBgn0261822	Bsg	FBgn0261822	1	16.77	17.36	17.07	17.7	17.28	17.38	0.39	0.11	0.19
CG14562	FBgn0037142	CG14562	FBgn0037142	7	20.33	20.32	20.34	20.48	20.55	20.39	0.15	0.11	0.2
CG9193	FBgn0005655	PCNA	FBgn0005655	1	19.92	19.75	19.76	19.52	19.66	19.7	-0.18	0.11	0.2
CG10283	FBgn0032681	CG10283	FBgn0032681	4	20.76	20.75	20.69	20.6	20.54	20.65	-0.14	0.11	0.2
CG3542	FBgn0031492	CG3542	FBgn0031492	13	23.98	23.93	23.87	24.01	23.99	24.1	0.1	0.11	0.2
CG13096	FBgn0032050	CG13096	FBgn0032050	9	24.54	24.46	24.31	24.49	24.75	24.55	0.16	0.11	0.2
CG8174	FBgn0286813	SRPK	FBgn0286813	1	18.2	17.73	17.46	18.16	18.08	18.28	0.37	0.11	0.2
CG5198	FBgn0032250	holn1	FBgn0032250	4	20.33	20.35	20.31	20.46	20.6	20.4	0.16	0.11	0.2
CG8571	FBgn0016983	smid	FBgn0016983	19	23.92	24.07	23.92	24.08	24.08	24.07	0.11	0.11	0.2
CG15433	FBgn0031604	Elp3	FBgn0031604	8	22.16	22.02	21.99	22.44	22.13	22.16	0.18	0.11	0.2
CG42307	FBgn0259203	CG42307	FBgn0259203	1	17.35	17.64	17.53	18.09	17.75	17.63	0.32	0.11	0.2
CG9159	FBgn0266449	Kr-h2	FBgn0266449	2	18.53	19.42	17.03	19.54	19.42	19.39	1.12	0.12	0.21
CG10672	FBgn0035588	CG10672	FBgn0035588	2	19.45	19.15	19.08	19.52	19.67	19.29	0.27	0.11	0.2
CG10753	FBgn0261933	SmD1	FBgn0261933	4	22.64	22.46	22.49	22.3	22.48	22.39	-0.14	0.11	0.2
CG11271	FBgn0286213	RpS12	FBgn0286213	1	21.42	21.56	21.33	21.03	21.24	21.41	-0.21	0.11	0.2
CG9009	FBgn0027601	pdgy	FBgn0027601	1	15.53	19.67	14.19	19.14	18.9	19.37	2.67	0.13	0.22
CG40049	FBgn0287187	mRpS5	FBgn0287187	3	21.96	21.92	21.85	21.51	21.88	21.78	-0.19	0.11	0.2
CG11416	FBgn0035025	uri	FBgn0035025	1	19.07	18.61	18.8	19.2	19.1	18.98	0.27	0.11	0.2
CG12818	FBgn0037809	CG12818	FBgn0037809	3	20.78	20.73	20.81	20.85	20.93	20.92	0.13	0.11	0.2
CG1716	FBgn0030486	Set2	FBgn0030486	2	18.45	18.32	18.05	18.3	17.69	17.7	-0.38	0.11	0.2
CG5792	FBgn0032455	Pih1D1	FBgn0032455	2	20.42	20.27	20.52	20.47	20.87	20.55	0.23	0.11	0.2
CG6202	FBgn0019925	Surf4	FBgn0019925	1	21.52	21.45	21.58	21.93	21.55	21.65	0.19	0.11	0.2
CG11050	FBgn0031836	CG11050	FBgn0031836	1	16.57	17.12	16.65	15.73	16.85	16.01	-0.58	0.11	0.2
CG8436	FBgn0037670	Ibf1	FBgn0037670	2	18.65	19.21	18.92	19.29	19.25	19.11	0.29	0.11	0.2
CG1100	FBgn0028690	Rpn5	FBgn0028690	9	23.55	23.92	23.52	24.08	23.95	23.7	0.25	0.12	0.21
CG18801	FBgn0041627	Ku80	FBgn0041627	6	21.29	21.44	21.52	21.32	21.14	21.3	-0.16	0.11	0.2
CG31793	FBgn0051793	CG31793	FBgn0051793	39	28.17	28.08	28.19	28.25	28.19	28.22	0.08	0.11	0.21
CG12284	FBgn0260635	Diap1	FBgn0260635	1	18.43	18.08	18.47	17.75	18.01	18.25	-0.32	0.12	0.21
CG4886	FBgn0028382	cyp33	FBgn0028382	2	19.8	20.31	19.89	20.36	20.38	20.09	0.28	0.12	0.21
CG9992	FBgn0030744	CG9992	FBgn0030744	1	19.31	19.36	19.18	19.22	20.05	19.67	0.36	0.12	0.21
CG7831	FBgn0002924	ncd	FBgn0002924	4	23.13	22.06	22.12	22.98	22.87	23.1	0.55	0.13	0.22
CG7020	FBgn0024806	DIP2	FBgn0024806	1	18.3	18.27	18.3	18.43	18.53	18.52	0.2	0.12	0.21
CG7375	FBgn0035853	UbcE2M	FBgn0035853	3	22.31	22.19	22.28	22.25	22.01	22.08	-0.15	0.12	0.21
CG5175	FBgn0038476	kuk	FBgn0038476	6	22.4	22.52	22.46	22.23	22.39	22.38	-0.13	0.12	0.21
CG8309	FBgn0033902	eIF3m	FBgn0033902	11	24.88	24.84	24.91	24.83	24.76	24.8	-0.08	0.12	0.21
CG4006	FBgn0010379	Akt1	FBgn0010379	1	18.74	18.86	18.24	18.98	19.47	18.68	0.43	0.12	0.21
CG8002	FBgn0031006	rictor	FBgn0031006	1	12.78	12.42	12.07	13.11	12.85	13.37	0.69	0.12	0.21
CG17369	FBgn0005671	Vha55	FBgn0005671	18	24.83	24.82	24.87	25.06	24.87	24.92	0.11	0.12	0.21
CG8709	FBgn0263593	Lpin	FBgn0263593	5	20.82	20.84	20.89	21.03	20.94	20.95	0.13	0.12	0.21
CG6759	FBgn0025781	Cdc16	FBgn0025781	1	19.32	19.16	19.49	19.81	19.51	19.41	0.25	0.12	0.21
CG15019	FBgn0035541	CG15019	FBgn0035541	5	24.1	23.95	24	24.06	24.12	24.2	0.11	0.12	0.21
CG10225	FBgn0039110	RanBP3	FBgn0039110	1	19.71	19.61	19.6	19.82	19.75	19.82	0.16	0.12	0.21
CG6404	FBgn0027615	OXA1L	FBgn0027615	1	17	16.94	16.97	15.86	16.6	16.95	-0.5	0.12	0.21
CG10110	FBgn0024698	Cpsf160	FBgn0024698	1	17.88	17.54	17.88	17.42	17.43	17.6	-0.28	0.12	0.21
CG4347	FBgn0035978	UGP	FBgn0035978	3	19.93	19.95	20.1	20.3	20.31	19.98	0.2	0.12	0.21
CG11887	FBgn0033540	Elp2	FBgn0033540	3	20.67	20.54	20.75	20.7	20.24	20.31	-0.24	0.12	0.21
CG1591	FBgn0029133	REG	FBgn0029133	3	20.8	21.22	20.66	21.13	21.18	21.11	0.25	0.12	0.21
CG31460	FBgn0051460	CG31460	FBgn0051460	1	18.4	17.55	18.02	18	18.73	18.71	0.49	0.12	0.21
CG12702	FBgn0031070	CG12702	FBgn0031070	3	19.55	19.41	19.64	19.69	19.67	19.76	0.17	0.12	0.21
CG5645	FBgn0036254	CG5645	FBgn0036254	2	20.77	21.02	20.65	20.76	20.57	20.46	-0.22	0.12	0.21
CG8882	FBgn0015834	eIF3i	FBgn0015834	13	24.99	25.03	25	25.09	25.04	25.1	0.07	0.12	0.21
CG8243	FBgn0033349	CG8243	FBgn0033349	1	18.81	18.74	18.59	18.84	18.95	18.94	0.2	0.12	0.21
CG12217	FBgn0003139	PpV	FBgn0003139	1	20.14	19.93	20.04	20.27	20.1	20.24	0.17	0.12	0.21
CG14299	FBgn0038651	Epg5	FBgn0038651	1	16.81	17.69	16.89	17.28	17.93	17.66	0.5	0.12	0.21
CG6040	FBgn0038679	CG6040	FBgn0038679	1	20.69	20.5	20.08	20.28	20.19	19.87	-0.31	0.12	0.22
CG42551	FBgn0261618	larp	FBgn0261618	17	24.75	24.72	24.62	24.78	24.8	24.77	0.09	0.12	0.22
CG7324	FBgn0037074	CG7324	FBgn0037074	1	18.1	18.25	18.35	18.77	18.37	18.38	0.27	0.12	0.22
CG17611	FBgn0034915	eIF6	FBgn0034915	1	18.64	18.87	18.84	18.77	18.27	18.49	-0.28	0.12	0.22
CG8705	FBgn0013726	pnut	FBgn0013726	11	24.49	24.51	24.56	24.65	24.66	24.53	0.09	0.12	0.22
CG13277	FBgn0261068	LSm7	FBgn0261068	1	19.41	18.9	19.23	19.61	19.38	19.36	0.27	0.13	0.22
CG34069	FBgn0013675	mt:CoII	FBgn0013675	3	23.06	23.16	23.19	23.34	23.24	23.18	0.12	0.13	0.22
CG1789	FBgn0030063	CG1789	FBgn0030063	3	22.57	22.14	22.41	22.28	22.11	22.14	-0.2	0.13	0.22
CG3923	FBgn0266572	ebo	FBgn0266572	1	18.95	19.34	19.32	18.97	18.84	19.07	-0.25	0.13	0.22
CG7897	FBgn0266580	Gp210	FBgn0266580	8	21.47	21.58	21.65	21.7	21.69	21.68	0.12	0.13	0.22
CG44436	FBgn0265630	sno	FBgn0265630	1	17.12	17.44	17.45	17.54	17.57	17.73	0.28	0.13	0.22
CG1821	FBgn0285949	RpL31	FBgn0285949	3	25.56	25.52	25.56	25.64	25.56	25.69	0.08	0.13	0.22
CG8711	FBgn0033260	Cul4	FBgn0033260	4	20.2	19.57	19.8	20.72	19.9	20.23	0.43	0.13	0.22
CG7035	FBgn0022942	Cbp80	FBgn0022942	8	22.36	22.18	22.4	22.34	21.83	22.07	-0.23	0.13	0.22
CG14286	FBgn0038673	CG14286	FBgn0038673	1	18.5	19.12	18.37	18.97	18.96	19.09	0.35	0.13	0.22
CG3210	FBgn0026479	Drp1	FBgn0026479	4	20.48	20.49	20.82	21.06	20.58	20.92	0.26	0.13	0.22
CG6480	FBgn0036964	FRG1	FBgn0036964	8	24.49	24.65	24.8	24.41	24.43	24.63	-0.16	0.13	0.22
CG3228	FBgn0001330	kz	FBgn0001330	1	19.98	20.08	19.97	19.84	19.92	19.83	-0.15	0.13	0.22
CG7266	FBgn0000565	Eip71CD	FBgn0000565	1	18.25	18.28	18.25	18.47	18.36	18.55	0.2	0.13	0.22
CG42595	FBgn0262124	uex	FBgn0262124	1	18.32	17.98	18.49	18.76	18.76	18.27	0.34	0.13	0.22
CG45186	FBgn0266696	Svil	FBgn0266696	2	19.04	19.06	18.97	19.15	19.2	19.23	0.17	0.13	0.22
CG10722	FBgn0032848	nesd	FBgn0032848	1	17.86	18.15	18.36	17.77	17.83	17.93	-0.28	0.13	0.22
CG9242	FBgn0000239	bur	FBgn0000239	1	18.73	18.69	18.58	18.96	18.96	18.72	0.21	0.13	0.22
CG7292	FBgn0038269	Rrp6	FBgn0038269	13	24.5	24.44	24.57	24.46	24.36	24.41	-0.09	0.13	0.22
CG2316	FBgn0039890	ABCD	FBgn0039890	1	17.17	17.83	18.22	18.19	17.93	18.64	0.51	0.13	0.22
CG9774	FBgn0026181	Rok	FBgn0026181	2	21.46	21.12	21.12	21.44	21.4	21.4	0.18	0.13	0.22
CG2009	FBgn0026262	bip2	FBgn0026262	8	23.54	23.51	23.52	23.5	23.74	23.7	0.12	0.13	0.23
CG6701	FBgn0033889	CG6701	FBgn0033889	1	20.15	20.06	20.03	20.15	20.2	20.34	0.15	0.13	0.23
CG11563	FBgn0039868	CG11563	FBgn0039868	3	22.3	22.19	22.14	22.28	22.35	22.33	0.11	0.13	0.23
CG33129	FBgn0053129	CG33129	FBgn0053129	2	19.06	19.01	18.98	19.22	19.39	19.05	0.2	0.14	0.23
CG3186	FBgn0285952	eEF5	FBgn0285952	1	20.43	20.37	20.52	20.26	20.25	20.38	-0.14	0.14	0.23
CG1841	FBgn0030330	Tango10	FBgn0030330	1	15.53	17.57	14.19	17.6	16.95	17.11	1.45	0.15	0.24
CG6233	FBgn0036136	Ufd1-like	FBgn0036136	2	17.83	19.53	17.46	19.23	19.32	19.06	0.93	0.15	0.25
CG33332	FBgn0067629	CG33332	FBgn0067629	5	23.26	23.32	23.31	23.25	23.12	23.23	-0.1	0.14	0.23
CG10084	FBgn0002044	swm	FBgn0002044	6	22.64	22.57	22.57	22.73	22.82	22.6	0.12	0.14	0.23
CG4878	FBgn0034237	eIF3b	FBgn0034237	24	25.69	25.83	25.74	25.82	25.83	25.85	0.08	0.14	0.23
CG4954	FBgn0034258	eIF3c	FBgn0034258	33	26.25	26.18	26.26	26.34	26.25	26.32	0.08	0.14	0.23
CG8385	FBgn0010348	Arf79F	FBgn0010348	1	18.41	18.66	18.5	18.54	18.21	17.95	-0.29	0.14	0.23
CG14641	FBgn0037220	CG14641	FBgn0037220	1	17.04	17.16	17.14	17.24	17.57	17.33	0.27	0.14	0.23
CG9045	FBgn0002914	Myb	FBgn0002914	1	18.94	18.76	18.75	18.87	19.03	19.19	0.22	0.14	0.23
CG7028	FBgn0027587	CG7028	FBgn0027587	8	23.48	23.62	23.7	23.47	23.43	23.54	-0.12	0.14	0.23
CG10370	FBgn0028684	Rpt5	FBgn0028684	13	23.88	23.77	23.77	23.91	23.95	23.85	0.09	0.14	0.23
CG3751	FBgn0261596	RpS24	FBgn0261596	2	21.42	21.56	21.25	21.26	22.08	22.13	0.41	0.15	0.25
CG8223	FBgn0037624	CG8223	FBgn0037624	2	19.59	19.53	19.78	19.66	20.12	19.82	0.23	0.14	0.23
CG14407	FBgn0030584	CG14407	FBgn0030584	1	18.99	19.31	19.35	18.69	19.06	19.1	-0.27	0.14	0.23
CG13879	FBgn0035120	wac	FBgn0035120	1	17.59	17.29	17.3	17.48	17.83	17.7	0.28	0.14	0.23
CG7712	FBgn0033570	ND-B14	FBgn0033570	3	21.45	21.19	21.74	21.92	21.61	21.61	0.25	0.14	0.24
CG33158	FBgn0053158	CG33158	FBgn0053158	4	20.21	20.16	20.08	20.26	20.4	20.23	0.14	0.14	0.24
CG5371	FBgn0011703	RnrL	FBgn0011703	7	22.02	21.87	21.91	21.43	21.82	21.92	-0.21	0.14	0.24
CG2807	FBgn0031266	Sf3b1	FBgn0031266	3	17.55	18.94	17.24	18.25	18.92	18.95	0.8	0.15	0.25
CG13350	FBgn0033890	Ctf4	FBgn0033890	2	19.94	20.1	20.12	20.16	20.16	20.3	0.15	0.14	0.24
CG7770	FBgn0036918	Pfdn6	FBgn0036918	1	19.11	19.1	19.43	19.17	18.93	18.81	-0.24	0.14	0.24
CG7989	FBgn0262560	wcd	FBgn0262560	1	16.83	17.1	17.18	17.61	17.04	17.46	0.33	0.14	0.24
CG3605	FBgn0031493	Sf3b2	FBgn0031493	2	18.18	18.29	18.07	18.54	18.28	18.38	0.22	0.14	0.24
CG8636	FBgn0029629	eIF3g1	FBgn0029629	8	24.21	24.26	24.3	24.43	24.26	24.37	0.1	0.15	0.24
CG9393	FBgn0037710	CG9393	FBgn0037710	1	18.35	18.36	18.73	18.67	18.91	18.62	0.25	0.15	0.24
CG11259	FBgn0036333	MICAL-like	FBgn0036333	5	21.46	21.74	21.64	21.75	21.77	21.74	0.14	0.15	0.24
CG4799	FBgn0267727	Pen	FBgn0267727	6	21.97	22.07	22.12	22.18	22.14	22.15	0.11	0.15	0.24
CG3361	FBgn0039507	mrt	FBgn0039507	1	18.06	17.88	17.8	17.7	17.64	17.74	-0.22	0.15	0.24
CG6223	FBgn0008635	betaCOP	FBgn0008635	20	24.63	24.73	24.67	24.7	24.82	24.77	0.08	0.15	0.24
CG7636	FBgn0036135	mRpL2	FBgn0036135	1	19.26	19.39	19.32	19.43	19.45	19.59	0.16	0.15	0.24
CG13890	FBgn0035169	Dci	FBgn0035169	2	20.39	20.4	20.46	20.79	20.47	20.49	0.17	0.15	0.25
CG4162	FBgn0002524	lace	FBgn0002524	2	19.5	19.59	19.54	19.67	19.81	19.62	0.15	0.15	0.25
CG5786	FBgn0010770	ppan	FBgn0010770	1	17.77	17.13	17.51	17.56	17.81	18.14	0.36	0.15	0.25
CG1685	FBgn0015527	peng	FBgn0015527	2	23.44	23.48	23.46	23.33	23.44	23.34	-0.09	0.15	0.25
CG4360	FBgn0038787	CG4360	FBgn0038787	1	18.32	18.35	18.25	18.22	18.11	17.99	-0.2	0.15	0.25
CG1371	FBgn0033482	CG1371	FBgn0033482	3	19.86	19.92	19.66	20.01	20.11	19.86	0.18	0.15	0.25
CG4488	FBgn0011737	Wee1	FBgn0011737	1	18.48	18.69	18.49	18.59	18.87	18.85	0.21	0.15	0.25
CG4758	FBgn0011584	Trp1	FBgn0011584	10	24.47	24.31	24.34	24.43	24.43	24.59	0.11	0.15	0.25
CG5853	FBgn0032167	CG5853	FBgn0032167	1	15.53	15.61	14.19	17.3	15.62	15.39	0.99	0.16	0.26
CG30122	FBgn0050122	CG30122	FBgn0050122	18	25.4	25.21	25.22	25.41	25.35	25.38	0.1	0.15	0.25
CG13630	FBgn0039219	CG13630	FBgn0039219	3	20.58	20.37	20.64	20.79	20.58	20.73	0.17	0.15	0.25
CG5904	FBgn0036557	mRpS31	FBgn0036557	1	15.53	13.29	15.59	15.42	16.2	15.87	1.03	0.16	0.26
CG42271	FBgn0259166	CG42271	FBgn0259166	1	14.33	13.93	14.03	13.85	13.76	12.97	-0.57	0.15	0.25
CG1244	FBgn0035357	MEP-1	FBgn0035357	8	22.47	22.31	22.38	22.43	22.51	22.55	0.11	0.15	0.25
CG45070	FBgn0266452	CTPsyn	FBgn0266452	2	20.04	19.72	19.8	19.49	19.74	19.73	-0.2	0.15	0.25
CG10757	FBgn0032849	mRpS18B	FBgn0032849	2	19.06	19.52	19.32	19.38	19.68	19.55	0.23	0.15	0.25
CG12163	FBgn0260462	CG12163	FBgn0260462	3	22.15	21.88	21.9	21.92	22.25	22.4	0.22	0.15	0.25
CG1163	FBgn0003275	RpII18	FBgn0003275	1	16.92	20.04	20.45	20.76	20.63	20.72	1.57	0.17	0.27
CG5642	FBgn0036258	eIF3l	FBgn0036258	13	24.8	24.78	24.79	24.91	24.8	24.89	0.07	0.16	0.26
CG3460	FBgn0023542	Nmd3	FBgn0023542	5	20.98	21.31	20.95	21.29	21.35	21.15	0.18	0.16	0.26
CG12162	FBgn0037329	POLDIP2	FBgn0037329	1	16.16	16.93	16.51	16.7	17.05	16.98	0.38	0.16	0.26
CG6987	FBgn0283477	SF2	FBgn0283477	10	25.55	25.39	25.49	25.38	25.31	25.44	-0.09	0.16	0.26
CG9306	FBgn0032511	ND-B22	FBgn0032511	1	20.37	20.38	20.3	20.53	20.39	20.51	0.13	0.16	0.26
CG3423	FBgn0020616	SA	FBgn0020616	3	19.85	19.8	19.88	19.99	19.88	20.1	0.15	0.16	0.26
CG4447	FBgn0035980	mRRF1	FBgn0035980	6	23.79	23.91	23.78	23.52	23.84	23.71	-0.14	0.16	0.26
CG11375	FBgn0039227	polybromo	FBgn0039227	1	19.34	19.38	19.53	19.49	19.55	19.71	0.17	0.16	0.26
CG32685	FBgn0052685	ZAP3	FBgn0052685	3	19.72	19.72	19.64	19.4	19.5	19.69	-0.17	0.16	0.26
CG17737	FBgn0035423	eIF1	FBgn0035423	3	21.69	21.55	21.62	21.34	21.54	21.57	-0.13	0.16	0.26
CG4412	FBgn0016119	ATPsynCF6	FBgn0016119	3	24.6	24.63	24.82	24.66	24.49	24.54	-0.12	0.16	0.26
CG9113	FBgn0030089	AP-1gamma	FBgn0030089	2	18.84	18.94	19.1	19.37	19.05	19.09	0.21	0.16	0.26
CG5343	FBgn0032248	Bug22	FBgn0032248	1	18.78	18.76	18.74	18.58	18.59	18.63	-0.16	0.16	0.26
CG1782	FBgn0023143	Uba1	FBgn0023143	12	22.38	22.5	22.52	22.59	22.54	22.57	0.1	0.16	0.26
CG3612	FBgn0011211	blw	FBgn0011211	20	28.24	28.35	28.38	28.3	28.19	28.25	-0.08	0.16	0.26
CG6439	FBgn0038922	Idh3b	FBgn0038922	8	22.85	23.02	23.09	23.2	23.06	23.08	0.12	0.16	0.27
CG1088	FBgn0283535	Vha26	FBgn0283535	6	21.93	22.68	22.06	22.3	22.76	22.66	0.35	0.18	0.28
CG14210	FBgn0031040	CG14210	FBgn0031040	1	22.82	22.99	22.81	22.95	22.95	23.05	0.11	0.17	0.27
CG9446	FBgn0265935	coro	FBgn0265935	2	17.94	18.1	17.55	17.88	18.25	18.41	0.32	0.17	0.27
CG5935	FBgn0026533	Dek	FBgn0026533	8	23.12	23.05	23.08	23.08	23.37	23.18	0.12	0.17	0.27
CG7110	FBgn0032521	CG7110	FBgn0032521	1	18.2	18.28	18.19	18.21	17.6	18.03	-0.28	0.17	0.27
CG43662	FBgn0263757	Rpb4	FBgn0263757	1	18.86	19.02	18.87	18.79	18.57	18.82	-0.19	0.17	0.27
CG10230	FBgn0028691	Rpn9	FBgn0028691	13	24.32	24.42	24.42	24.59	24.49	24.38	0.1	0.17	0.27
CG15093	FBgn0034390	CG15093	FBgn0034390	1	18.81	18.94	18.44	18.36	18.52	18.58	-0.25	0.17	0.27
CG33526	FBgn0053526	PNUTS	FBgn0053526	3	22.8	22.93	22.91	22.88	23.08	23	0.11	0.17	0.27
CG5119	FBgn0265297	pAbp	FBgn0265297	16	24.78	24.69	24.75	24.96	24.72	24.85	0.1	0.17	0.27
CG7671	FBgn0038609	Nup43	FBgn0038609	2	20.39	20.27	20.23	20.45	20.39	20.42	0.12	0.17	0.27
CG14712	FBgn0037924	CG14712	FBgn0037924	2	19.38	19.39	19.36	19.71	19.53	19.39	0.17	0.17	0.27
CG5784	FBgn0034282	Mapmodulin	FBgn0034282	2	27.16	26.97	27.07	26.96	26.99	27	-0.08	0.17	0.27
CG15481	FBgn0032487	Ski6	FBgn0032487	3	21.43	21.28	21.55	21.16	21.11	21.45	-0.18	0.17	0.27
CG2118	FBgn0039877	Mccc1	FBgn0039877	7	21.98	22.08	22.03	22.44	22.12	22.03	0.17	0.17	0.27
CG3018	FBgn0010602	lwr	FBgn0010602	2	20.28	20.21	20.17	19.94	20.14	20.15	-0.14	0.17	0.27
CG7878	FBgn0037549	CG7878	FBgn0037549	8	23.74	23.4	23.41	23.59	23.69	23.7	0.15	0.17	0.27
CG11590	FBgn0030545	CG11590	FBgn0030545	1	15.67	14.6	15.29	14.93	14.69	14.41	-0.51	0.17	0.28
CG15317	FBgn0030137	CG15317	FBgn0030137	3	21.01	21.04	21.08	21.05	20.79	20.88	-0.13	0.17	0.28
CG5460	FBgn0001169	H	FBgn0001169	1	15.87	15.19	15.28	15.45	14.45	14.9	-0.52	0.17	0.28
CG14792	FBgn0003517	sta	FBgn0003517	6	24.9	25.16	25.22	25.63	25.16	25.17	0.23	0.18	0.29
CG1825	FBgn0010342	Map60	FBgn0010342	3	20.17	20.14	20.11	20.19	20.39	20.23	0.13	0.17	0.28
CG4261	FBgn0022787	Hel89B	FBgn0022787	1	14.88	15.19	15.31	15.76	15.34	15.4	0.37	0.17	0.28
CG2092	FBgn0261385	scra	FBgn0261385	3	20.04	19.8	19.63	19.92	20.04	20.06	0.18	0.17	0.28
CG42599	FBgn0261015	Pif1A	FBgn0261015	1	17.18	17.19	17.13	15.04	17.04	16.97	-0.82	0.18	0.28
CG6174	FBgn0011745	Arp1	FBgn0011745	3	22.06	22.12	22.27	21.83	22.12	22.06	-0.15	0.18	0.28
CG4115	FBgn0038017	CG4115	FBgn0038017	1	17.58	18.06	16.88	17.41	18.42	18.51	0.61	0.18	0.28
CG12877	FBgn0039544	CG12877	FBgn0039544	1	19.37	19.83	19.44	19.81	19.68	19.77	0.21	0.18	0.28
CG11265	FBgn0030049	Trf4-1	FBgn0030049	1	13.27	13.38	13.67	14.08	13.75	13.88	0.46	0.18	0.28
CG4510	FBgn0038746	Surf6	FBgn0038746	4	23.37	23.71	23.51	23.57	23.74	23.7	0.14	0.18	0.28
CG31873	FBgn0260750	Mulk	FBgn0260750	1	17.37	17.55	17.71	17.9	17.75	17.67	0.23	0.18	0.28
CG9575	FBgn0031090	Rab35	FBgn0031090	1	19.64	18.99	19.54	19.67	19.67	19.62	0.26	0.18	0.28
CG11444	FBgn0029715	CG11444	FBgn0029715	3	24.68	24.67	24.74	24.48	24.59	24.72	-0.1	0.18	0.28
CG10612	FBgn0037322	Or83a	FBgn0037322	1	17.74	17.81	17.9	17.75	17.44	17.61	-0.22	0.18	0.28
CG6455	FBgn0019960	Mitofilin	FBgn0019960	12	23.58	23.45	23.46	23.73	23.54	23.54	0.11	0.18	0.28
CG10687	FBgn0086443	AsnRS	FBgn0086443	7	21.92	22.28	22.06	22.27	22.28	22.15	0.15	0.18	0.28
CG4173	FBgn0014029	Sep-02	FBgn0014029	6	22.82	22.93	23.04	23.1	23	23.01	0.11	0.18	0.28
CG1081	FBgn0041191	Rheb	FBgn0041191	3	21.28	21.17	21.24	21.66	21.22	21.34	0.17	0.18	0.29
CG8648	FBgn0025832	Fen1	FBgn0025832	2	23.91	23.96	23.99	23.99	24.04	24.04	0.07	0.18	0.29
CG9302	FBgn0032514	CG9302	FBgn0032514	7	22.06	22.17	22.34	22.38	22.21	22.38	0.14	0.18	0.29
CG4152	FBgn0001986	Mtr4	FBgn0001986	1	17.64	17.68	17.19	18.04	17.87	17.51	0.3	0.18	0.29
CG8460	FBgn0031996	CG8460	FBgn0031996	1	18.06	18.7	18.96	18.16	18.11	18.4	-0.35	0.18	0.29
CG10128	FBgn0003742	tra2	FBgn0003742	1	19.61	19.64	19.76	19.83	19.78	19.8	0.13	0.18	0.29
CG11738	FBgn0027334	l(1)G0004	FBgn0027334	1	19.67	19.67	19.92	20.29	20.39	19.56	0.33	0.19	0.29
CG4012	FBgn0023081	gek	FBgn0023081	1	17.87	18.42	18.38	18.44	17.42	17.49	-0.44	0.19	0.29
CG8525	FBgn0033735	Dera	FBgn0033735	1	19.15	19.12	19.15	19.54	19.16	19.27	0.18	0.18	0.29
CG3342	FBgn0029874	CG3342	FBgn0029874	1	14.62	14.63	14.82	15.08	15	15.01	0.34	0.19	0.29
CG8778	FBgn0033761	CG8778	FBgn0033761	2	19.63	19.5	19.39	19.81	20.24	19.39	0.3	0.19	0.29
CG5505	FBgn0260936	scny	FBgn0260936	7	22.76	22.66	22.59	22.38	22.58	22.66	-0.13	0.19	0.29
CG9201	FBgn0026433	Grip128	FBgn0026433	1	17.87	17.72	17.58	18.08	17.74	18.05	0.23	0.19	0.29
CG4993	FBgn0024734	PRL-1	FBgn0024734	2	19.25	19.21	19.37	19.01	19.15	19.2	-0.16	0.19	0.29
CG9388	FBgn0024833	AP-1mu	FBgn0024833	1	19.07	18.36	18.83	18.65	18.44	18.28	-0.3	0.19	0.29
CG18174	FBgn0028694	Rpn11	FBgn0028694	3	23.08	22.97	23.12	23.21	23.15	23.1	0.09	0.19	0.29
CG8108	FBgn0027567	CG8108	FBgn0027567	3	21.46	21.23	21.25	21.41	21.46	21.43	0.12	0.19	0.29
CG11577	FBgn0036847	CNPYb	FBgn0036847	1	17	17.07	16.87	17.24	17.14	17.21	0.22	0.19	0.3
CG3167	FBgn0034962	MAN1	FBgn0034962	1	17.84	17.27	17.87	17.68	16.93	17.27	-0.36	0.19	0.3
CG7883	FBgn0039726	eIF2Balpha	FBgn0039726	2	19.86	20.17	18.25	20.04	20.31	20.18	0.75	0.21	0.32
CG15792	FBgn0265434	zip	FBgn0265434	35	24.98	24.87	24.87	24.79	25.19	25.29	0.18	0.2	0.31
CG9776	FBgn0027866	CG9776	FBgn0027866	2	23.79	23.97	23.78	24.18	24.02	23.79	0.15	0.2	0.3
CG9938	FBgn0030500	Ndc80	FBgn0030500	1	19.15	18.76	18.96	18.62	18.82	18.83	-0.2	0.2	0.3
CG9213	FBgn0030655	CG9213	FBgn0030655	7	24.25	24.33	24.44	24.39	24.19	23.97	-0.16	0.2	0.3
CG4951	FBgn0039563	CG4951	FBgn0039563	4	22.28	22.14	22.15	22.12	22.01	22.13	-0.1	0.2	0.3
CG9556	FBgn0013746	alien	FBgn0013746	4	21.32	21.22	21.51	21.67	21.44	21.4	0.15	0.2	0.31
CG9684	FBgn0037583	CG9684	FBgn0037583	5	20.98	21.15	21.13	21.03	21.41	21.29	0.16	0.2	0.31
CG1245	FBgn0037359	MED27	FBgn0037359	1	19.24	18.46	18.83	19.01	18.2	16.56	-0.92	0.22	0.33
CG15561	FBgn0039829	CG15561	FBgn0039829	5	23.34	23.52	23.36	23.42	23.55	23.55	0.1	0.2	0.31
CG1440	FBgn0030038	CG1440	FBgn0030038	1	18.16	18.3	18.54	18.49	18.42	18.76	0.22	0.2	0.31
CG7946	FBgn0039743	CG7946	FBgn0039743	4	20.46	20.51	20.65	20.67	20.64	20.65	0.11	0.2	0.31
CG9188	FBgn0031878	sip2	FBgn0031878	2	18.69	18.8	18.66	19.19	18.63	19	0.22	0.2	0.31
CG5190	FBgn0034351	rswl	FBgn0034351	1	17.98	18.39	18.31	17.93	18.02	18.09	-0.21	0.2	0.31
CG1664	FBgn0003321	sbr	FBgn0003321	2	21.31	21.29	21.1	21.1	21.15	21.1	-0.11	0.2	0.31
CG4180	FBgn0001977	CIAPIN1	FBgn0001977	1	18.75	19.02	18.97	19.01	19.17	19.07	0.17	0.2	0.31
CG12079	FBgn0266582	ND-30	FBgn0266582	5	22.75	22.89	22.75	22.63	22.79	22.67	-0.1	0.21	0.31
CG15860	FBgn0060296	pain	FBgn0060296	22	25.45	25.51	25.51	25.55	25.55	25.54	0.06	0.21	0.31
CG7998	FBgn0262559	Mdh2	FBgn0262559	1	17.44	17.6	17.28	17.56	17.59	17.85	0.22	0.21	0.31
CG4215	FBgn0015546	spel1	FBgn0015546	2	19.84	19.81	19.83	20.11	19.78	20.06	0.15	0.21	0.31
CG6384	FBgn0000283	Cp190	FBgn0000283	7	22.14	22.18	22.1	22.18	22.26	22.22	0.08	0.21	0.32
CG8441	FBgn0034086	CG8441	FBgn0034086	3	20.92	20.86	21.05	20.82	20.71	20.93	-0.12	0.21	0.32
CG3727	FBgn0010583	dock	FBgn0010583	1	20.14	20.1	20.35	19.93	20.04	20.18	-0.15	0.21	0.32
CG4043	FBgn0037815	Rrp46	FBgn0037815	2	21.93	21.79	21.95	22.04	21.93	22	0.1	0.21	0.32
CG3998	FBgn0270924	zf30C	FBgn0270924	1	17.99	17.58	18.05	18.05	18.01	18.25	0.23	0.21	0.32
CG8048	FBgn0262511	Vha44	FBgn0262511	1	20.93	21.09	21.2	17.02	20.79	20.85	-1.52	0.23	0.34
CG13917	FBgn0035237	CG13917	FBgn0035237	3	18.91	17.91	17.86	18.19	19.06	18.88	0.48	0.22	0.33
CG5055	FBgn0000163	baz	FBgn0000163	1	17.7	17.36	17.27	17.04	17.09	17.42	-0.26	0.21	0.33
CG32528	FBgn0052528	parvin	FBgn0052528	2	19.77	19.65	19.57	19.97	19.7	19.77	0.15	0.21	0.33
CG13484	FBgn0036406	CG13484	FBgn0036406	1	17.31	13.29	14.19	17	17.13	15.39	1.57	0.23	0.34
CG9603	FBgn0040529	COX7A	FBgn0040529	2	21.03	20.97	20.9	21.02	20.76	20.72	-0.13	0.22	0.33
CG17259	FBgn0031497	SerRS	FBgn0031497	3	20.06	20.33	20.3	20.29	20.34	20.49	0.14	0.22	0.33
CG3284	FBgn0004855	RpII15	FBgn0004855	1	17.37	18.1	16.45	17.2	18.76	18.23	0.76	0.23	0.34
CG32261	FBgn0045479	Gr64a	FBgn0045479	1	18.3	18.04	18.22	18.21	17.82	17.9	-0.21	0.22	0.33
CG6322	FBgn0036733	U4-U6-60K	FBgn0036733	1	17.99	17.53	18.25	18.07	18.03	18.66	0.33	0.22	0.33
CG3989	FBgn0020513	Paics	FBgn0020513	6	21.31	21.3	21.39	21.5	21.45	21.35	0.1	0.22	0.33
CG3034	FBgn0040339	MED22	FBgn0040339	1	15.53	16.76	14.19	17.65	16.85	15.39	1.14	0.23	0.34
CG4454	FBgn0032105	borr	FBgn0032105	1	17.86	17.75	17.45	15.49	17.58	17.59	-0.8	0.23	0.34
CG3911	FBgn0260859	Bet3	FBgn0260859	4	22.37	22.41	22.43	22.82	22.82	22.23	0.22	0.22	0.34
CG9900	FBgn0004643	Zw10	FBgn0004643	6	20.55	20.61	20.61	20.59	20.5	20.26	-0.14	0.22	0.33
CG11133	FBgn0037205	BoYb	FBgn0037205	1	19.87	19.58	19.85	19.9	19.4	17.93	-0.69	0.24	0.35
CG15440	FBgn0031607	Secp43	FBgn0031607	1	18.85	18.55	18.83	19.12	18.81	18.88	0.19	0.22	0.33
CG12547	FBgn0250830	CG12547	FBgn0250830	1	17.72	17.88	17.5	17.56	17.43	17.49	-0.21	0.22	0.33
CG7838	FBgn0263855	BubR1	FBgn0263855	1	17.61	17.67	17.6	18.24	17.83	17.57	0.26	0.22	0.33
CG9484	FBgn0002431	hyd	FBgn0002431	1	17.75	17.57	17.29	16.63	17.47	17.45	-0.35	0.22	0.33
CG5745	FBgn0038855	CG5745	FBgn0038855	1	16.22	16.02	16.15	16.45	15.08	15.43	-0.48	0.22	0.34
CG8176	FBgn0037702	CG8176	FBgn0037702	1	18.53	18.7	18.2	18.51	18.81	18.77	0.22	0.23	0.34
CG5277	FBgn0025366	Ip259	FBgn0025366	2	21.28	21.46	21.34	21.45	21.5	21.42	0.1	0.23	0.34
CG8594	FBgn0033755	ClC-b	FBgn0033755	2	18.95	18.91	19.11	19.23	18.37	18.46	-0.3	0.23	0.34
CG14969	FBgn0035440	CG14969	FBgn0035440	2	20.19	20.49	20.28	20.47	20.46	20.41	0.13	0.23	0.34
CG3847	FBgn0029867	CG3847	FBgn0029867	1	18.23	17.88	17.99	17.82	17.95	17.74	-0.2	0.23	0.34
CG2075	FBgn0004372	aly	FBgn0004372	1	19.72	20.06	19.56	19.78	18.66	19.65	-0.42	0.24	0.35
CG3008	FBgn0031643	CG3008	FBgn0031643	1	18.59	18.88	19.06	19.12	18.87	19.15	0.2	0.23	0.34
CG5313	FBgn0032244	RfC3	FBgn0032244	1	18.93	18.93	19.18	19.05	18.73	18.69	-0.19	0.23	0.34
CG15224	FBgn0000259	CkIIbeta	FBgn0000259	4	25.96	25.82	25.9	26.11	25.84	26.02	0.1	0.23	0.34
CG1737	FBgn0030293	CG1737	FBgn0030293	10	22.84	22.89	22.9	22.86	22.72	22.8	-0.08	0.23	0.34
CG34407	FBgn0085436	Not1	FBgn0085436	13	22.39	22.35	22.43	22.61	22.37	22.49	0.1	0.23	0.34
CG40002	FBgn0058002	ND-AGGG	FBgn0058002	1	18.84	19.12	19.04	18.96	18.92	18.5	-0.21	0.23	0.34
CG7128	FBgn0022724	Taf8	FBgn0022724	1	19.45	18.99	19.22	19.18	18.85	19.03	-0.2	0.23	0.35
CG12233	FBgn0027291	Idh3a	FBgn0027291	10	24.05	24.05	24.05	24.18	24.07	24.1	0.07	0.23	0.35
CG3335	FBgn0036018	CG3335	FBgn0036018	2	18.97	19.36	19.19	19.26	19.46	19.31	0.17	0.23	0.35
CG1945	FBgn0005632	faf	FBgn0005632	12	22.58	22.49	22.61	22.56	22.37	22.47	-0.09	0.23	0.35
CG8929	FBgn0034504	CG8929	FBgn0034504	8	24.26	24.16	24.11	24.11	24.06	24.15	-0.07	0.23	0.35
CG11228	FBgn0261456	hpo	FBgn0261456	3	20.18	20.38	20.09	20.49	20.48	20.16	0.16	0.23	0.35
CG6180	FBgn0032453	CG6180	FBgn0032453	1	19.85	19.61	19.46	19.18	19.41	19.69	-0.21	0.23	0.35
CG4320	FBgn0029840	raptor	FBgn0029840	1	15.21	14.66	14.45	14.32	14.66	14.12	-0.41	0.24	0.35
CG6522	FBgn0034223	Tes	FBgn0034223	2	19.48	19.23	19.46	19.6	19.6	19.41	0.15	0.24	0.35
CG5641	FBgn0038046	CG5641	FBgn0038046	1	18.59	18.54	18.65	18.64	17.9	18.48	-0.26	0.24	0.35
CG3733	FBgn0250786	Chd1	FBgn0250786	3	20.93	20.07	20.02	20.6	20.72	20.65	0.32	0.25	0.36
CG6726	FBgn0039049	CG6726	FBgn0039049	1	15.53	15.71	14.19	15.29	17.6	15.39	0.95	0.25	0.36
CG14992	FBgn0028484	Ack	FBgn0028484	11	23.89	23.83	23.97	24.06	23.87	24.02	0.09	0.24	0.35
CG15253	FBgn0028948	CG15253	FBgn0028948	1	19.05	19	18.41	18.72	18.75	17.1	-0.63	0.25	0.36
CG7269	FBgn0014189	Hel25E	FBgn0014189	2	19.31	18.98	19.42	19.45	19.34	19.44	0.17	0.24	0.35
CG10206	FBgn0026196	nop5	FBgn0026196	18	26.42	26.4	26.21	26.4	26.43	26.45	0.08	0.24	0.35
CG11876	FBgn0039635	Pdhb	FBgn0039635	1	18.35	17.99	18.39	18.53	18.53	18.27	0.2	0.24	0.35
CG4583	FBgn0261984	Ire1	FBgn0261984	1	17.94	17.83	17.72	15.71	18	17.51	-0.76	0.25	0.36
CG7955	FBgn0035244	ABCB7	FBgn0035244	2	19.61	19.27	19.41	19.62	19.55	19.56	0.15	0.24	0.35
CG9253	FBgn0032919	CG9253	FBgn0032919	6	22.58	22.56	22.45	22.52	22.67	22.67	0.09	0.24	0.35
CG42648	FBgn0285951	mRpS34	FBgn0285951	6	21.29	21.29	21.4	21.33	21.2	21.16	-0.1	0.24	0.36
CG3321	FBgn0038224	ATPsynE	FBgn0038224	1	21.37	21.7	21.81	21.73	21.84	21.74	0.15	0.25	0.36
CG9231	FBgn0036887	CG9231	FBgn0036887	1	16.42	16.38	16.94	16.99	16.81	16.74	0.27	0.25	0.36
CG3401	FBgn0003888	betaTub60D	FBgn0003888	5	25.1	25.11	25.07	25.13	25.14	25.16	0.05	0.25	0.36
CG46386	FBgn0286809	xmas	FBgn0286809	7	24.51	24.54	24.54	24.49	24.66	24.66	0.07	0.25	0.36
CG3416	FBgn0002787	Rpn8	FBgn0002787	7	23.23	23.46	23.15	23.18	23.2	23.13	-0.11	0.25	0.36
CG1908	FBgn0030274	Lint-1	FBgn0030274	3	22.66	22.6	22.54	22.45	22.53	22.57	-0.08	0.25	0.36
CG11943	FBgn0031078	Nup205	FBgn0031078	14	22.21	22.36	22.24	22.38	22.32	22.35	0.08	0.25	0.36
CG13608	FBgn0039159	mRpS24	FBgn0039159	1	18.74	18.47	18.57	18.83	18.1	17.98	-0.29	0.25	0.36
CG1651	FBgn0011747	Ank	FBgn0011747	4	20.57	20.34	20.18	20.49	20.47	20.55	0.14	0.25	0.36
CG15432	FBgn0031603	CG15432	FBgn0031603	2	24.88	25.41	25.11	24.41	25.16	24.96	-0.29	0.26	0.38
CG2822	FBgn0003386	Shaw	FBgn0003386	1	17.05	16.99	17.13	17.39	17.2	17.16	0.19	0.25	0.36
CG12165	FBgn0260991	Incenp	FBgn0260991	3	20.39	20.31	20.59	20.38	20.25	20.28	-0.12	0.25	0.36
CG3458	FBgn0026015	Top3beta	FBgn0026015	1	17.56	17.07	17.14	17.6	17.21	17.78	0.27	0.25	0.36
CG15220	FBgn0266421	RPA3	FBgn0266421	2	20.65	20.87	20.89	20.95	21.14	20.76	0.15	0.25	0.36
CG13391	FBgn0027094	AlaRS	FBgn0027094	1	16.28	16.46	16.56	16.8	16.95	16.36	0.27	0.25	0.36
CG2171	FBgn0086355	Tpi	FBgn0086355	1	18.62	18.8	18.39	18.93	18.85	18.61	0.19	0.25	0.37
CG18176	FBgn0036038	defl	FBgn0036038	1	17.2	17.02	16.85	17.78	16.84	17.41	0.32	0.26	0.37
CG5733	FBgn0034310	Nup75	FBgn0034310	3	19.72	19.57	19.66	19.94	19.75	19.66	0.13	0.26	0.37
CG7337	FBgn0031374	Wdr62	FBgn0031374	1	19.41	19.57	19.57	19.32	19.56	19.21	-0.15	0.26	0.37
CG1786	FBgn0030369	Cyp318a1	FBgn0030369	1	15.2	14.99	14.95	14.93	15.5	15.75	0.35	0.26	0.38
CG4692	FBgn0035032	ATPsynF	FBgn0035032	3	24.37	24.35	24.39	24.56	24.35	24.43	0.08	0.26	0.38
CG18803	FBgn0284421	Psn	FBgn0284421	1	15.58	16.61	16.36	16.77	16.4	16.46	0.36	0.26	0.38
CG14622	FBgn0025641	DAAM	FBgn0025641	2	19.56	19.26	19.77	19.61	19.2	19.14	-0.21	0.26	0.38
CG8414	FBgn0034073	CG8414	FBgn0034073	1	18.71	18.91	19.04	18.56	18.94	18.59	-0.19	0.26	0.38
CG10777	FBgn0029979	mahe	FBgn0029979	1	17.76	17.82	18.43	18.08	18.45	18.24	0.25	0.26	0.38
CG8878	FBgn0027504	CG8878	FBgn0027504	1	17.59	17.56	17.54	17.21	17.36	17.56	-0.18	0.27	0.38
CG7957	FBgn0038578	MED17	FBgn0038578	5	21.39	21.45	21.39	21.61	21.38	21.53	0.1	0.27	0.38
CG13388	FBgn0027932	Akap200	FBgn0027932	5	21.88	22.19	22.15	22.19	22.19	22.17	0.11	0.27	0.38
CG6008	FBgn0027785	NP15.6	FBgn0027785	2	21.59	21.41	21.56	21.77	21.52	21.6	0.11	0.27	0.39
CG12592	FBgn0037811	CG12592	FBgn0037811	2	22.7	22.75	22.53	22.37	22.74	22.48	-0.13	0.27	0.39
CG17704	FBgn0026401	Nipped-B	FBgn0026401	2	17.15	17.11	17.08	17.11	17	16.52	-0.24	0.27	0.39
CG11007	FBgn0034455	CG11007	FBgn0034455	1	19.16	19.12	18.98	19.92	19.04	19.14	0.28	0.27	0.39
CG7885	FBgn0026373	RpII33	FBgn0026373	3	21.33	21.27	21.22	21.35	21.44	21.3	0.09	0.27	0.39
CG10223	FBgn0284220	Top2	FBgn0284220	27	24.8	24.76	24.78	24.93	24.76	24.85	0.07	0.27	0.39
CG9765	FBgn0026620	tacc	FBgn0026620	3	20.15	20.22	20.67	20.29	19.88	20.27	-0.2	0.27	0.39
CG3291	FBgn0020261	pcm	FBgn0020261	1	18.02	17.98	17.84	18.18	17.98	18.17	0.16	0.27	0.39
CG11061	FBgn0034697	GM130	FBgn0034697	9	22.07	22.07	22.08	22.32	22.1	22.08	0.09	0.28	0.39
CG2945	FBgn0000316	cin	FBgn0000316	2	20.17	19.98	20.11	20.1	20.39	20.15	0.13	0.28	0.39
CG2049	FBgn0020621	Pkn	FBgn0020621	1	18.4	18.05	18.32	18.44	18.68	18.24	0.19	0.28	0.39
CG2684	FBgn0002542	lds	FBgn0002542	9	21.96	21.65	21.46	21.79	21.93	21.8	0.15	0.28	0.39
CG10045	FBgn0001149	GstD1	FBgn0001149	1	20.89	20.86	20.72	20.71	20.85	20.56	-0.12	0.28	0.39
CG8725	FBgn0027054	CSN4	FBgn0027054	8	23.65	23.68	23.81	23.71	23.64	23.56	-0.08	0.28	0.39
CG5064	FBgn0035947	Srp68	FBgn0035947	5	21.49	21.54	21.48	21.52	21.3	21.42	-0.09	0.28	0.39
CG11030	FBgn0031736	CG11030	FBgn0031736	2	21.39	21.46	21	19.85	21.38	21.12	-0.5	0.3	0.41
CG9745	FBgn0000412	D1	FBgn0000412	4	25	25.01	24.8	24.94	25.06	25.05	0.08	0.28	0.4
CG18600	FBgn0038601	CG18600	FBgn0038601	1	17.25	17.85	17.86	17.96	17.62	18.15	0.26	0.28	0.4
CG33162	FBgn0011509	SrpRbeta	FBgn0011509	1	17.35	17.27	16.99	17.29	17.65	17.31	0.21	0.28	0.4
CG6370	FBgn0034277	OstDelta	FBgn0034277	11	23.87	23.93	24.02	24.12	23.97	23.97	0.08	0.28	0.4
CG9655	FBgn0026630	nes	FBgn0026630	1	18.81	18.37	18.93	18.95	18.83	18.9	0.19	0.28	0.4
CG1078	FBgn0037255	Fip1	FBgn0037255	6	24.72	25.11	25.2	24.2	25.05	24.88	-0.3	0.3	0.42
CG30149	FBgn0250850	rig	FBgn0250850	1	15.53	17.53	14.19	15.28	18.07	17.89	1.33	0.3	0.42
CG9160	FBgn0011361	ND-ACP	FBgn0011361	2	22.15	22.34	22.35	22.42	22.29	22.4	0.09	0.28	0.4
CG8070	FBgn0033379	Mys45A	FBgn0033379	3	22.14	22.21	21.99	22.1	22.26	22.28	0.1	0.28	0.4
CG8912	FBgn0014870	Psi	FBgn0014870	2	19.44	19.64	19.98	19.74	20.11	19.79	0.19	0.28	0.4
CG9366	FBgn0014380	RhoL	FBgn0014380	1	18.49	18.23	18.43	18.56	17.69	18.12	-0.26	0.29	0.4
CG12123	FBgn0030039	CG12123	FBgn0030039	3	21.7	21.61	22.62	21.84	22.59	22.77	0.43	0.3	0.42
CG11447	FBgn0038737	CG11447	FBgn0038737	3	21.32	21.46	21.53	21.28	21.34	21.41	-0.09	0.29	0.4
CG2038	FBgn0028836	CSN7	FBgn0028836	3	19.91	19.89	20.14	19.95	20.21	20.17	0.13	0.29	0.41
CG3086	FBgn0013987	MAPk-Ak2	FBgn0013987	1	16.67	17.16	16.71	16.47	16.67	16.71	-0.23	0.29	0.41
CG14802	FBgn0026873	MED18	FBgn0026873	1	19.81	19.7	19.88	20.21	19.55	20.29	0.22	0.29	0.41
CG3731	FBgn0038271	UQCR-C1	FBgn0038271	10	23.95	24.14	24.07	24.27	24.04	24.12	0.09	0.29	0.41
CG8993	FBgn0035334	CG8993	FBgn0035334	3	23.5	23.67	23.86	24.09	23.6	23.83	0.16	0.3	0.41
CG5374	FBgn0003676	CCT1	FBgn0003676	16	28.71	30.16	30.37	30.25	30.24	30.3	0.52	0.31	0.43
CG32409	FBgn0052409	CG32409	FBgn0052409	1	18.07	17.68	17.64	17.65	17.68	17.49	-0.19	0.29	0.41
CG17299	FBgn0264357	SNF4Agamma	FBgn0264357	6	22.32	22.53	22.6	22.23	22.41	22.48	-0.11	0.29	0.41
CG2947	FBgn0029676	HIP-R	FBgn0029676	2	19.64	19.63	19.75	19.56	19.62	19.53	-0.1	0.29	0.41
CG5026	FBgn0035945	CG5026	FBgn0035945	1	19.58	19.55	19.5	18.87	19.55	19.57	-0.22	0.3	0.41
CG6013	FBgn0038675	CG6013	FBgn0038675	6	25.01	25.08	25.23	25.02	24.96	25.11	-0.08	0.3	0.41
CG8383	FBgn0037737	Pnn	FBgn0037737	3	21.19	21.09	21.23	21.19	21.21	21.41	0.1	0.3	0.41
CG9032	FBgn0014391	sun	FBgn0014391	2	22.63	22.93	22.8	22.68	22.72	22.68	-0.09	0.3	0.41
CG6315	FBgn0000662	fl(2)d	FBgn0000662	2	20.55	20.33	20.2	20.27	20.6	20.67	0.15	0.3	0.41
CG18809	FBgn0042132	CG18809	FBgn0042132	6	23.6	23.58	23.46	23.62	23.7	23.54	0.07	0.3	0.41
CG15727	FBgn0030410	Aven	FBgn0030410	1	19.75	19.82	19.75	19.61	19.72	19.7	-0.1	0.3	0.42
CG4260	FBgn0264855	AP-2alpha	FBgn0264855	15	24.03	23.81	23.94	24.02	24.03	23.96	0.07	0.3	0.42
CG5202	FBgn0032391	escl	FBgn0032391	1	18.99	19.12	18.93	19.08	18.63	18.85	-0.16	0.3	0.42
CG9390	FBgn0012034	AcCoAS	FBgn0012034	1	16.83	17.48	17.08	17.14	18.23	17.14	0.37	0.3	0.42
CG17031	FBgn0032439	Ref2	FBgn0032439	1	18.42	18.36	18.13	18.37	18.58	18.42	0.15	0.3	0.42
CG2520	FBgn0086372	lap	FBgn0086372	1	16.11	16.75	15.99	16.5	17.04	16.28	0.33	0.3	0.42
CG2934	FBgn0285910	VhaAC39-1	FBgn0285910	2	20.14	20.22	20.33	20.29	20.4	20.3	0.1	0.3	0.42
CG3420	FBgn0033100	CG3420	FBgn0033100	1	20.19	19.89	20.1	20	19.86	19.97	-0.12	0.3	0.42
CG8264	FBgn0004856	Bx42	FBgn0004856	6	21.6	21.7	21.58	21.5	21.59	21.55	-0.08	0.31	0.42
CG10719	FBgn0010300	brat	FBgn0010300	1	17.49	17.06	17.27	17.55	17.64	17.25	0.2	0.31	0.42
CG9764	FBgn0004049	yrt	FBgn0004049	1	16.06	17.14	16.15	16.17	17.35	17.19	0.45	0.31	0.42
CG7123	FBgn0261800	LanB1	FBgn0261800	2	20.01	19.86	19.91	19.81	19.77	19.89	-0.1	0.31	0.42
CG30342	FBgn0050342	Prp38	FBgn0050342	8	24.37	24.33	24.26	24.12	24.27	24.34	-0.08	0.31	0.42
CG3195	FBgn0034968	RpL12	FBgn0034968	3	23.83	24.17	23.89	22.49	24.02	23.93	-0.48	0.33	0.45
CG2207	FBgn0022893	Df31	FBgn0022893	3	20.28	20.18	20.45	20.46	20.46	20.32	0.11	0.31	0.43
CG3587	FBgn0023521	CG3587	FBgn0023521	2	18.87	18.83	18.69	18.64	18.72	18.66	-0.12	0.31	0.43
CG3941	FBgn0034878	pita	FBgn0034878	1	17.84	17.82	17.71	15.47	17.97	17.74	-0.73	0.33	0.45
CG7109	FBgn0004177	mts	FBgn0004177	1	20.13	20.02	20.35	19.88	20.08	20.14	-0.13	0.32	0.43
CG7920	FBgn0039737	CG7920	FBgn0039737	1	17.99	18.18	18.83	17.92	18.35	17.96	-0.26	0.32	0.43
CG2469	FBgn0035205	Ctr9	FBgn0035205	9	21.46	21.67	21.51	21.71	21.62	21.57	0.09	0.32	0.43
CG4538	FBgn0038745	CG4538	FBgn0038745	2	18.65	18.46	18.32	18.61	18.7	18.55	0.14	0.32	0.43
CG6754	FBgn0261530	nbs	FBgn0261530	1	17.26	16.83	17.46	17.66	17.41	17.19	0.24	0.32	0.43
CG18178	FBgn0036035	CG18178	FBgn0036035	1	19.5	19.46	19.15	18.97	19.07	19.51	-0.19	0.32	0.44
CG3365	FBgn0020304	drongo	FBgn0020304	1	16.64	16.62	17.16	16.77	17	17.43	0.26	0.32	0.44
CG4679	FBgn0033816	CG4679	FBgn0033816	4	20.63	20.81	20.66	20.71	20.86	20.79	0.09	0.32	0.44
CG8004	FBgn0036920	CG8004	FBgn0036920	1	17.28	17.16	17.02	17.3	17.38	17.27	0.16	0.32	0.44
CG13671	FBgn0035867	CG13671	FBgn0035867	1	18.12	18.35	18.07	18.2	18.68	18.23	0.18	0.32	0.44
CG9140	FBgn0031771	ND-51	FBgn0031771	3	21.05	20.66	20.95	20.88	20.77	20.62	-0.13	0.32	0.44
CG9248	FBgn0032923	CG9248	FBgn0032923	1	17.47	17.55	17.73	17.91	17.62	17.71	0.16	0.32	0.44
CG9802	FBgn0015615	SMC3	FBgn0015615	3	19.97	20.02	19.88	20	20.15	20.01	0.1	0.32	0.44
CG6192	FBgn0032341	Reps	FBgn0032341	4	21.69	21.66	21.71	21.57	21.54	21.72	-0.08	0.33	0.44
CG1489	FBgn0020369	Rpt6	FBgn0020369	13	24.31	24.33	24.19	24.2	24.22	24.24	-0.06	0.33	0.44
CG5491	FBgn0039459	IntS12	FBgn0039459	2	23.29	23.35	23.38	23.36	23.55	23.34	0.07	0.33	0.45
CG10460	FBgn0034443	cer	FBgn0034443	1	18.85	18.07	18.8	18.54	18.33	18.12	-0.24	0.33	0.45
CG2503	FBgn0010750	atms	FBgn0010750	5	20.88	20.71	20.98	21.06	20.92	20.89	0.1	0.33	0.45
CG1359	FBgn0260860	Bet5	FBgn0260860	3	20.54	20.39	20.71	20.73	20.53	20.72	0.11	0.33	0.45
CG6871	FBgn0000261	Cat	FBgn0000261	12	24.2	24.1	24.17	23.98	24.14	24.15	-0.07	0.33	0.45
CG11076	FBgn0039929	CG11076	FBgn0039929	1	18.51	18.59	18.91	18.42	18.59	18.55	-0.15	0.33	0.45
CG3702	FBgn0031590	CG3702	FBgn0031590	5	21.35	21.45	21.46	21.25	21.32	21.44	-0.08	0.33	0.45
CG12859	FBgn0033961	ND-B15	FBgn0033961	1	20.81	20.64	20.46	20.67	20.39	20.48	-0.12	0.33	0.45
CG6197	FBgn0033859	fand	FBgn0033859	4	20.22	20.39	20.42	20.53	20.42	20.36	0.09	0.34	0.45
CG8905	FBgn0010213	Sod2	FBgn0010213	1	22.02	22.3	22.46	22.36	22.34	22.42	0.11	0.34	0.45
CG5976	FBgn0036999	isoQC	FBgn0036999	8	25.25	25.36	25.39	25.29	25.47	25.44	0.07	0.34	0.45
CG17332	FBgn0027779	VhaSFD	FBgn0027779	6	21.07	21	21.19	21.11	20.87	21	-0.09	0.34	0.46
CG3446	FBgn0029868	ND-B16.6	FBgn0029868	3	21.3	21.34	21.42	21.33	21.18	21.31	-0.08	0.34	0.46
CG10195	FBgn0032787	CG10195	FBgn0032787	1	17.35	17.81	17.24	17.81	17.35	17.93	0.23	0.34	0.46
CG4528	FBgn0003449	snf	FBgn0003449	1	21.18	21.06	21.24	21.23	20.75	21.11	-0.13	0.34	0.46
CG4771	FBgn0263143	vret	FBgn0263143	1	15.53	18.76	14.19	15.28	19.01	19.06	1.62	0.36	0.48
CG32707	FBgn0052707	APC4	FBgn0052707	1	18.45	18.08	17.59	19.22	17.55	18.74	0.47	0.36	0.47
CG1673	FBgn0030482	CG1673	FBgn0030482	3	20.75	20.51	20.63	20.53	20.84	20.86	0.12	0.35	0.46
CG4887	FBgn0031318	CG4887	FBgn0031318	20	26	25.98	25.91	25.96	26.02	26.04	0.05	0.35	0.47
CG7697	FBgn0027841	CstF64	FBgn0027841	2	18.36	19.04	18.84	18.54	19.29	19.16	0.25	0.35	0.47
CG11396	FBgn0037022	CG11396	FBgn0037022	4	21	20.94	21.1	21.06	21.05	21.16	0.08	0.35	0.47
CG42574	FBgn0260794	ctrip	FBgn0260794	1	17.24	16.93	16.95	17.2	17.09	17.32	0.17	0.35	0.47
CG2789	FBgn0031263	Tspo	FBgn0031263	1	17.94	18.38	18	18	18.01	17.83	-0.16	0.35	0.47
CG17172	FBgn0039946	ATbp	FBgn0039946	1	16.76	16.47	16.57	16.84	16.83	16.65	0.18	0.35	0.47
CG32531	FBgn0044030	mRpS14	FBgn0044030	1	19.34	18.13	18.74	18.79	19.15	19.17	0.3	0.36	0.47
CG7925	FBgn0003714	tko	FBgn0003714	2	22.34	22.47	22.5	22.29	22.33	22.45	-0.07	0.35	0.47
CG3997	FBgn0023170	RpL39	FBgn0023170	1	27.05	26.87	27.03	26.97	26.9	26.92	-0.06	0.35	0.47
CG9934	FBgn0032467	CG9934	FBgn0032467	3	20.27	20.14	20.16	20.27	19.99	20	-0.1	0.35	0.47
CG9346	FBgn0034572	CG9346	FBgn0034572	9	24.84	24.83	24.93	24.9	24.68	24.82	-0.07	0.36	0.47
CG6422	FBgn0039261	Ythdf	FBgn0039261	3	22.56	22.7	22.61	22.56	22.55	22.59	-0.06	0.36	0.48
CG2674	FBgn0005278	Sam-S	FBgn0005278	4	22.6	22.7	22.72	22.68	22.47	22.63	-0.08	0.36	0.48
CG1637	FBgn0030245	CG1637	FBgn0030245	21	26.33	26.31	26.52	26.45	26.4	26.51	0.06	0.36	0.48
CG13281	FBgn0022213	Cse1	FBgn0022213	17	23.28	23.34	23.46	23.45	23.39	23.42	0.06	0.36	0.48
CG17765	FBgn0033529	CG17765	FBgn0033529	2	23.01	22.83	22.79	22.75	22.94	22.65	-0.09	0.36	0.48
CG4208	FBgn0026751	XRCC1	FBgn0026751	3	22.13	22.21	22.04	22.23	22.2	22.15	0.07	0.36	0.48
CG5434	FBgn0038810	Srp72	FBgn0038810	3	22.2	22.15	22.04	22.08	22.01	22.09	-0.07	0.36	0.48
CG31755	FBgn0051755	SoYb	FBgn0051755	1	18.32	18.36	18.73	18.58	18.19	18.1	-0.18	0.36	0.48
CG3107	FBgn0033005	CG3107	FBgn0033005	2	17.76	19.1	17.33	17.82	19.18	18.86	0.56	0.38	0.49
CG33106	FBgn0043884	mask	FBgn0043884	2	19.82	19.85	19.78	19.69	19.82	19.69	-0.09	0.36	0.48
CG3424	FBgn0036007	path	FBgn0036007	1	18.14	18.6	18.17	17.86	18.85	16.43	-0.59	0.38	0.49
CG11266	FBgn0031883	Caper	FBgn0031883	10	23.72	23.78	23.76	23.76	23.82	23.81	0.05	0.37	0.48
CG7857	FBgn0026738	CG7857	FBgn0026738	1	17.06	17.22	17.21	17.28	17.34	17.29	0.14	0.37	0.48
CG1249	FBgn0261789	SmD2	FBgn0261789	3	23.11	23.08	23.11	23.21	23.11	23.14	0.05	0.37	0.48
CG3433	FBgn0021944	Coprox	FBgn0021944	2	19.97	18.77	19.48	19.59	19.81	19.67	0.28	0.37	0.49
CG6674	FBgn0036063	CG6674	FBgn0036063	3	20.15	20.34	20.5	20.23	20.24	20.21	-0.1	0.37	0.48
CG6607	FBgn0039204	CG6607	FBgn0039204	2	20.33	20.14	20.27	20.42	20.42	20.2	0.1	0.37	0.48
CG11837	FBgn0039627	CG11837	FBgn0039627	6	22.28	22.29	22.2	22.27	22.35	22.33	0.06	0.37	0.49
CG13349	FBgn0033886	Rpn13	FBgn0033886	11	22.92	22.98	23.09	22.99	22.91	22.9	-0.06	0.37	0.49
CG14233	FBgn0040089	meso18E	FBgn0040089	1	17.41	13.29	14.19	15.97	16.76	15.39	1.07	0.39	0.5
CG17768	FBgn0032240	CG17768	FBgn0032240	2	21.39	21.31	21.44	20.81	21.47	21.37	-0.16	0.37	0.49
CG3889	FBgn0027057	CSN1b	FBgn0027057	3	20.97	21.19	21.19	21.19	21.18	21.23	0.08	0.37	0.49
CG17246	FBgn0261439	SdhA	FBgn0261439	5	21.6	21.45	21.46	21.71	21.63	21.44	0.09	0.37	0.49
CG6521	FBgn0027363	Stam	FBgn0027363	2	18.65	19.06	18.81	18.64	19.32	19.13	0.19	0.37	0.49
CG5000	FBgn0027948	msps	FBgn0027948	5	20.47	20.54	20.18	20.41	20.4	20.8	0.14	0.37	0.49
CG8036	FBgn0037607	CG8036	FBgn0037607	12	24.02	24.28	24.24	24.06	24.17	24.09	-0.07	0.37	0.49
CG1453	FBgn0030268	Klp10A	FBgn0030268	2	19.69	19.61	19.7	19.85	19.66	19.75	0.09	0.37	0.49
CG11779	FBgn0038683	CG11779	FBgn0038683	1	18.01	18.28	18.32	18.56	18.31	18.18	0.15	0.37	0.49
CG7942	FBgn0035838	ldbr	FBgn0035838	1	18.2	18.45	18.22	18.72	17.87	17.36	-0.31	0.38	0.49
CG10504	FBgn0028427	Ilk	FBgn0028427	1	18.67	18.57	18.9	19.15	18.79	18.67	0.16	0.38	0.49
CG8426	FBgn0033029	Not3	FBgn0033029	1	20	20.06	19.6	19.7	19.89	19.66	-0.13	0.38	0.49
CG8545	FBgn0033741	CG8545	FBgn0033741	4	21.97	22.51	22.46	22.33	22.49	22.52	0.14	0.38	0.49
CG7626	FBgn0040273	Spt5	FBgn0040273	5	22.16	21.91	21.99	21.94	21.96	21.94	-0.07	0.38	0.49
CG1548	FBgn0029093	cathD	FBgn0029093	6	21.61	21.54	21.56	21.64	21.33	21.47	-0.09	0.38	0.49
CG3661	FBgn0010078	RpL23	FBgn0010078	5	26.67	26.9	26.79	26.65	26.7	26.82	-0.07	0.38	0.5
CG43444	FBgn0263392	Tet	FBgn0263392	1	16.56	16.79	16.36	16.66	16.31	16.14	-0.2	0.38	0.5
CG2925	FBgn0014366	noi	FBgn0014366	3	21.38	21.22	21.47	21.65	20.78	21.01	-0.21	0.39	0.51
CG11486	FBgn0035397	CG11486	FBgn0035397	2	19.84	20.35	20.34	19.98	20.03	20.1	-0.14	0.38	0.5
CG3683	FBgn0035046	ND-19	FBgn0035046	1	20.41	20.41	20.46	20.72	20.55	20.31	0.1	0.39	0.5
CG6958	FBgn0039004	Nup133	FBgn0039004	7	22.2	22.15	22.12	22.14	22.15	22.44	0.09	0.39	0.5
CG4463	FBgn0001224	Hsp23	FBgn0001224	5	23.41	23.37	23.47	23.4	23.43	23.62	0.07	0.39	0.51
CG2246	FBgn0039790	CG2246	FBgn0039790	1	18.01	18.07	18.15	18.25	18.32	18.03	0.12	0.39	0.51
CG17800	FBgn0033159	Dscam1	FBgn0033159	1	18.71	18.85	18.66	18.59	19.07	18.99	0.14	0.4	0.51
CG40218	FBgn0267398	Yeti	FBgn0267398	3	21.24	21.18	21.21	21.27	21.23	21.31	0.06	0.4	0.51
CG32555	FBgn0026375	RhoGAPp190	FBgn0026375	12	24.22	24.15	24.25	24.07	24.23	24.15	-0.05	0.4	0.52
CG33546	FBgn0250732	gfzf	FBgn0250732	1	18.03	18.83	18.13	18.63	18.36	18.6	0.2	0.4	0.52
CG10320	FBgn0034645	ND-B12	FBgn0034645	1	19.44	19.68	19.54	19.83	19.6	19.54	0.11	0.4	0.52
CG15119	FBgn0034430	mip40	FBgn0034430	2	19.12	19.48	19.48	19.29	19.12	19.32	-0.12	0.4	0.52
CG5012	FBgn0011787	mRpL12	FBgn0011787	2	20.38	20.25	20.26	20.45	19.7	20.25	-0.17	0.4	0.52
CG6907	FBgn0031711	CG6907	FBgn0031711	2	19.15	19.68	19.25	19.6	19.48	19.4	0.14	0.41	0.53
CG4364	FBgn0032138	CG4364	FBgn0032138	3	23.29	22.82	22.82	22.83	22.84	22.92	-0.11	0.41	0.53
CG8573	FBgn0003567	su(Hw)	FBgn0003567	1	18.53	19.07	18.53	18.88	18.87	18.82	0.15	0.41	0.53
CG5649	FBgn0024887	kin17	FBgn0024887	1	18.64	18.18	18.91	18.51	18.29	18.42	-0.17	0.41	0.53
CG31641	FBgn0266521	stai	FBgn0266521	5	21.59	21.9	21.68	21.71	21.78	21.96	0.09	0.42	0.53
CG9710	FBgn0021768	nudC	FBgn0021768	5	22.21	22.18	22.25	22.36	22.17	22.29	0.06	0.42	0.53
CG8439	FBgn0010621	CCT5	FBgn0010621	14	23.86	23.99	23.95	23.97	24.05	23.93	0.05	0.42	0.53
CG3849	FBgn0063485	Lasp	FBgn0063485	5	21.49	21.24	21.47	21.47	21.45	21.5	0.07	0.42	0.53
CG4266	FBgn0034598	CG4266	FBgn0034598	4	21.63	21.51	21.34	21.22	21.57	21.39	-0.1	0.42	0.53
CG11148	FBgn0039936	Gyf	FBgn0039936	5	22.45	22.58	22.58	22.43	22.51	22.5	-0.06	0.42	0.54
CG17927	FBgn0264695	Mhc	FBgn0264695	1	20.12	20.03	19.88	20.04	20.21	20.03	0.09	0.42	0.54
CG31817	FBgn0028899	CG31817	FBgn0028899	1	19.24	19.17	19.29	19.36	19.23	19.38	0.09	0.42	0.54
CG4307	FBgn0016691	ATPsynO	FBgn0016691	9	25.31	25.39	25.36	25.38	25.27	25.28	-0.04	0.43	0.54
CG12203	FBgn0031021	ND-18	FBgn0031021	1	20.78	20.68	20.69	20.99	20.25	20.46	-0.15	0.43	0.55
CG11505	FBgn0035424	Larp4B	FBgn0035424	5	21.25	20.62	20.74	21.12	21.15	20.8	0.15	0.43	0.55
CG15101	FBgn0010053	Jheh1	FBgn0010053	1	19.11	16.76	19.8	15.38	18.48	18.74	-1.03	0.45	0.57
CG9172	FBgn0030718	ND-20	FBgn0030718	3	21.69	21.74	21.68	21.82	21.7	21.76	0.05	0.43	0.55
CG8890	FBgn0031661	Gmd	FBgn0031661	1	16.2	15.83	14.8	15.07	15.67	15.09	-0.33	0.43	0.55
CG17454	FBgn0039977	CG17454	FBgn0039977	8	23.36	23.23	23.12	22.97	23.21	23.29	-0.08	0.43	0.55
CG30499	FBgn0050499	Rpe	FBgn0050499	1	18.92	18.84	19.88	18.08	19.2	19.29	-0.35	0.45	0.57
CG8983	FBgn0033663	ERp60	FBgn0033663	18	27.6	27.71	27.74	27.69	27.59	27.64	-0.04	0.44	0.56
CG8235	FBgn0033351	AIMP1	FBgn0033351	1	19.06	19	19.09	19.17	18.8	18.86	-0.11	0.44	0.56
CG5146	FBgn0035617	l(3)psg2	FBgn0035617	2	19.71	19.62	19.59	19.52	19.98	19.74	0.11	0.44	0.56
CG3732	FBgn0034750	CG3732	FBgn0034750	1	18.64	18.39	18.23	18.28	18.34	18.3	-0.12	0.44	0.56
CG8885	FBgn0262467	Scox	FBgn0262467	3	21	20.78	21.07	21.16	20.88	21.09	0.09	0.44	0.56
CG14482	FBgn0034245	UQCR-6.4	FBgn0034245	1	19.38	19.2	19.38	19.37	19.12	19.18	-0.09	0.44	0.56
CG17568	FBgn0032763	CG17568	FBgn0032763	1	15.53	23.76	14.19	15.28	23.77	23.68	3.08	0.47	0.59
CG2063	FBgn0033400	CG2063	FBgn0033400	6	23.47	23.41	23.51	23.54	23.42	23.59	0.05	0.44	0.56
CG5436	FBgn0001230	Hsp68	FBgn0001230	2	19.44	19.37	19.45	19.58	19.13	19.21	-0.11	0.44	0.56
CG5776	FBgn0032450	CG5776	FBgn0032450	12	23.73	23.51	23.56	23.67	23.4	23.51	-0.07	0.45	0.56
CG12320	FBgn0038590	CG12320	FBgn0038590	1	18.71	18.85	18.83	19.05	18.67	18.13	-0.18	0.45	0.57
CG8977	FBgn0015019	CCT3	FBgn0015019	17	24.97	25.07	25.14	25.14	25.12	25.05	0.05	0.45	0.57
CG3527	FBgn0029714	CG3527	FBgn0029714	1	18.41	18.4	18.1	18.25	18.16	18.17	-0.11	0.45	0.57
CG42555	FBgn0261671	tweek	FBgn0261671	1	16.13	15.7	15.51	15.53	15.5	15.73	-0.19	0.45	0.57
CG8858	FBgn0033698	CG8858	FBgn0033698	2	17.87	17.89	18.31	18.67	18.01	17.94	0.19	0.45	0.57
CG2139	FBgn0028646	aralar1	FBgn0028646	8	22	22.11	22.2	22.35	22.14	22.05	0.08	0.45	0.57
CG11107	FBgn0033160	Dhx15	FBgn0033160	3	19.92	19.43	19.64	19.69	19.84	19.78	0.11	0.45	0.57
CG6146	FBgn0004924	Top1	FBgn0004924	12	23.11	23.22	23.18	23.3	23.1	23.29	0.06	0.45	0.57
CG3071	FBgn0023527	CG3071	FBgn0023527	1	17.89	17.86	17.57	17.85	17.86	17.95	0.11	0.45	0.57
CG30015	FBgn0050015	CG30015	FBgn0050015	1	15.93	15.68	15.82	15.96	15.78	16.2	0.17	0.45	0.57
CG13887	FBgn0035165	CG13887	FBgn0035165	2	21.34	21.42	21.55	21.5	21.63	21.38	0.07	0.46	0.58
CG5045	FBgn0032229	ClpP	FBgn0032229	3	20.25	20.44	20.42	20.53	20.33	20.47	0.07	0.46	0.58
CG4913	FBgn0026441	ear	FBgn0026441	11	23.69	23.73	23.6	23.71	23.78	23.67	0.05	0.46	0.58
CG3931	FBgn0034879	Rrp4	FBgn0034879	5	22.06	22.09	22.14	22.25	22	22.25	0.07	0.46	0.58
CG6711	FBgn0011836	Taf2	FBgn0011836	16	24.94	25.01	24.92	24.96	25.03	25	0.04	0.46	0.58
CG12267	FBgn0038057	CG12267	FBgn0038057	1	17.32	17.77	17.52	17.77	17.97	17.35	0.16	0.47	0.58
CG8793	FBgn0260655	l(3)76BDm	FBgn0260655	6	21.21	21.14	21.32	21.45	21.2	21.24	0.07	0.47	0.59
CG33484	FBgn0052311	zormin	FBgn0052311	1	16.89	16.05	16.1	17.15	16.63	16.06	0.27	0.47	0.59
CG3312	FBgn0014024	Rnp4F	FBgn0014024	13	23.35	23.53	23.43	23.61	23.42	23.45	0.06	0.47	0.59
CG9273	FBgn0032906	RPA2	FBgn0032906	3	21.38	21.64	21.53	21.8	21.57	21.44	0.09	0.47	0.59
CG18321	FBgn0029002	miple2	FBgn0029002	2	19.38	19.45	19.41	19.39	19.34	19.29	-0.07	0.47	0.59
CG4858	FBgn0037011	CG4858	FBgn0037011	1	16.09	16.39	16.04	15.82	16.59	15.38	-0.25	0.48	0.6
CG1666	FBgn0001565	Hlc	FBgn0001565	3	20.54	20.52	20.44	20.42	20.35	20.54	-0.06	0.48	0.6
CG32103	FBgn0052103	SCaMC	FBgn0052103	3	19.88	20.16	19.73	19.88	19.83	19.78	-0.09	0.48	0.6
CG8605	FBgn0035762	Rint1	FBgn0035762	1	17.61	17.91	18.34	17.28	17.83	18.14	-0.2	0.48	0.6
CG8276	FBgn0263144	bin3	FBgn0263144	1	20.2	20.4	20.26	20.4	20.26	20.4	0.07	0.48	0.6
CG17759	FBgn0004435	Galphaq	FBgn0004435	1	22.5	22.28	22.31	22.32	22	22.49	-0.1	0.48	0.6
CG16817	FBgn0037728	p23	FBgn0037728	3	21.67	21.74	21.67	21.93	21.95	21.48	0.09	0.49	0.61
CG10686	FBgn0041775	tral	FBgn0041775	15	25.03	25.02	24.92	24.87	25	24.98	-0.04	0.49	0.61
CG12202	FBgn0031020	Naa15-16	FBgn0031020	1	18.6	17.6	17.35	16.58	17.88	18	-0.36	0.5	0.62
CG4678	FBgn0030778	CG4678	FBgn0030778	1	21.12	20.85	21.27	21.3	21.06	21.16	0.09	0.49	0.61
CG18005	FBgn0037660	beag	FBgn0037660	2	21.16	21.26	21.16	21.1	21.19	21.14	-0.05	0.49	0.61
CG5594	FBgn0261794	kcc	FBgn0261794	1	16.24	16.97	16.54	16.47	17.01	16.82	0.18	0.49	0.61
CG43886	FBgn0264478	CG43886	FBgn0264478	1	17.94	17.95	18.41	18.17	17.84	17.91	-0.13	0.49	0.61
CG10539	FBgn0283472	S6k	FBgn0283472	1	18.48	18.22	18.7	18.69	18.43	18.62	0.11	0.49	0.61
CG17266	FBgn0033089	CG17266	FBgn0033089	1	17.65	17.77	17.72	17.74	17.29	17.74	-0.12	0.5	0.61
CG1972	FBgn0039691	IntS11	FBgn0039691	1	15.66	15.3	15.38	15.26	15.45	15.14	-0.16	0.5	0.61
CG9277	FBgn0284243	betaTub56D	FBgn0284243	7	27.02	27.04	27.11	27.19	27.02	27.07	0.04	0.5	0.62
CG1486	FBgn0031174	CG1486	FBgn0031174	2	18.57	18.38	18.13	18.66	18.45	18.31	0.12	0.5	0.62
CG4460	FBgn0001223	Hsp22	FBgn0001223	1	16.81	17	16.92	16.76	16.69	16.92	-0.12	0.5	0.62
CG8607	FBgn0035760	CG8607	FBgn0035760	2	20.36	20.43	20.85	20.4	20.43	20.52	-0.1	0.5	0.62
CG6143	FBgn0004401	Pep	FBgn0004401	11	25.86	25.9	25.78	25.75	25.9	25.77	-0.04	0.5	0.62
CG3476	FBgn0031881	MME1	FBgn0031881	1	16.85	17.03	16.8	17.01	17.09	15.9	-0.23	0.51	0.62
CG9987	FBgn0032781	RtcB	FBgn0032781	3	20.84	20.88	20.75	21	20.63	20.58	-0.09	0.51	0.62
CG8614	FBgn0024542	Neos	FBgn0024542	1	17.74	17.07	16.53	18.62	17.04	16.84	0.38	0.52	0.63
CG3431	FBgn0011327	Uch-L5	FBgn0011327	7	22.36	22.41	22.29	22.34	22.39	22.47	0.05	0.51	0.62
CG15356	FBgn0031377	CG15356	FBgn0031377	1	19.76	19.64	19.46	19.8	19.59	19.71	0.08	0.51	0.63
CG1104	FBgn0037467	Ufl1	FBgn0037467	1	18.31	18.86	18.78	18.98	18.07	18.35	-0.18	0.51	0.63
CG42724	FBgn0261641	CG42724	FBgn0261641	18	24.04	24.06	24.03	23.91	24.23	24.17	0.06	0.51	0.63
CG1738	FBgn0030291	CG1738	FBgn0030291	1	18.37	18.18	18.57	18.21	18.39	18.22	-0.1	0.51	0.63
CG10922	FBgn0011638	La	FBgn0011638	5	20.92	20.91	20.84	21.03	20.97	20.83	0.06	0.51	0.63
CG6302	FBgn0010741	Pfdn2	FBgn0010741	1	16.75	17.09	16.74	16.81	16.51	18.1	0.28	0.51	0.63
CG2238	FBgn0000559	eEF2	FBgn0000559	16	24.83	24.79	24.71	24.88	24.81	24.77	0.04	0.51	0.63
CG6340	FBgn0030648	CG6340	FBgn0030648	2	18.93	19.59	19.34	19.31	19.55	19.36	0.12	0.51	0.63
CG31911	FBgn0263916	Ent2	FBgn0263916	1	17.4	17.2	17.38	17.38	17.84	17.18	0.14	0.51	0.63
CG5216	FBgn0024291	Sirt1	FBgn0024291	14	25.82	25.78	26.03	25.98	25.6	25.83	-0.08	0.52	0.63
CG18572	FBgn0003189	r	FBgn0003189	39	25.26	25.29	25.35	25.38	25.16	25.22	-0.05	0.51	0.63
CG4399	FBgn0261954	east	FBgn0261954	1	17.19	17.17	17.39	16.95	16.92	17.47	-0.14	0.52	0.63
CG32505	FBgn0023177	Pp4-19C	FBgn0023177	2	20.22	20.09	20.03	20.24	19.94	19.92	-0.08	0.52	0.63
CG9031	FBgn0028546	ics	FBgn0028546	1	18.25	18.08	17.96	18.04	17.92	18.06	-0.09	0.52	0.63
CG10392	FBgn0261403	sxc	FBgn0261403	3	19.48	19.17	19.4	19.57	19.39	19.33	0.08	0.52	0.64
CG31137	FBgn0011725	twin	FBgn0011725	4	20.52	20.46	20.83	20.98	20.44	20.71	0.11	0.52	0.64
CG9007	FBgn0036398	upSET	FBgn0036398	4	21.4	21.46	21.43	21.33	21.42	21.41	-0.04	0.52	0.64
CG9667	FBgn0037550	CG9667	FBgn0037550	5	20.99	21.46	21.27	21.38	21.27	21.31	0.08	0.52	0.64
CG11132	FBgn0034537	DMAP1	FBgn0034537	1	17.9	18.38	17.47	18.02	18.12	18.06	0.15	0.53	0.64
CG9350	FBgn0034576	ND-B14.7	FBgn0034576	2	18.98	19.53	19.31	19.23	19.47	19.43	0.1	0.53	0.64
CG4257	FBgn0016917	Stat92E	FBgn0016917	2	19.98	20.33	19.78	20.13	20.24	20.02	0.1	0.53	0.64
CG11883	FBgn0033538	CG11883	FBgn0033538	4	20.56	20.69	20.6	20.82	20.64	20.57	0.06	0.53	0.64
CG1516	FBgn0027580	PCB	FBgn0027580	1	17.71	17.64	17.69	17.79	17.68	17.83	0.09	0.53	0.64
CG7111	FBgn0020618	Rack1	FBgn0020618	12	25.51	25.55	25.55	25.56	25.52	25.45	-0.03	0.53	0.64
CG42522	FBgn0261437	CSN8	FBgn0261437	1	18.88	19.15	19.2	19.38	18.99	19.15	0.1	0.53	0.65
CG42698	FBgn0261588	pdm3	FBgn0261588	3	20.14	20.32	19.97	20.13	20.32	20.2	0.07	0.53	0.65
CG8454	FBgn0285911	Vps16A	FBgn0285911	1	19.1	18.68	19.33	19.18	18.51	18.99	-0.15	0.53	0.65
CG1965	FBgn0037466	CG1965	FBgn0037466	1	19.07	18.06	18.4	18.73	18.77	18.52	0.16	0.54	0.65
CG8107	FBgn0025866	CalpB	FBgn0025866	1	20.77	22.1	19.66	21.89	19.91	18.81	-0.64	0.55	0.66
CG1291	FBgn0035401	Alg2	FBgn0035401	2	18.62	18.41	18.66	18.83	18.62	18.52	0.09	0.54	0.65
CG2098	FBgn0266268	FeCH	FBgn0266268	2	18.34	18.3	17.93	18.36	18.13	18.38	0.1	0.54	0.65
CG9688	FBgn0039765	mRpS18C	FBgn0039765	4	21.61	21.6	21.82	21.75	21.43	21.65	-0.07	0.54	0.65
CG8384	FBgn0001139	gro	FBgn0001139	1	18.46	18.23	18.22	18.28	18.28	18.1	-0.09	0.55	0.66
CG2852	FBgn0034753	CG2852	FBgn0034753	2	20	19.6	19.78	19.53	19.84	19.76	-0.09	0.55	0.66
CG31258	FBgn0266916	Cenp-C	FBgn0266916	8	23.38	23.43	23.31	23.39	23.44	23.39	0.04	0.55	0.66
CG14307	FBgn0004652	fru	FBgn0004652	1	17.56	18.01	17.72	17.42	17.71	17.82	-0.12	0.55	0.66
CG31223	FBgn0051223	CG31223	FBgn0051223	1	16.16	16.05	14.96	15.17	15.66	15.65	-0.23	0.55	0.66
CG11027	FBgn0013749	Arf102F	FBgn0013749	1	18.99	19.13	19.12	19.19	19.09	19.15	0.06	0.55	0.67
CG16838	FBgn0036574	elg1	FBgn0036574	1	19.12	18.91	18.94	19.28	19.04	18.91	0.08	0.55	0.67
CG6354	FBgn0004903	Rb97D	FBgn0004903	1	17.09	17.19	17.29	16.9	17	17.34	-0.11	0.56	0.67
CG6556	FBgn0286070	cnk	FBgn0286070	1	18.82	18.72	18.73	18.79	18.51	18.74	-0.08	0.56	0.67
CG5826	FBgn0038519	Prx3	FBgn0038519	5	24.64	24.61	24.81	24.85	24.59	24.77	0.05	0.56	0.67
CG9250	FBgn0032921	Mpp6	FBgn0032921	1	19.87	19.56	19.65	20.17	19.59	19.64	0.11	0.56	0.67
CG12155	FBgn0029957	CG12155	FBgn0029957	2	21.44	21.35	21.31	21.46	21.48	21.3	0.05	0.56	0.67
CG6593	FBgn0003134	Pp1alpha-96A	FBgn0003134	1	19.87	19.87	19.43	19.66	19.68	20.16	0.11	0.56	0.67
CG6755	FBgn0039066	EloA	FBgn0039066	7	23.51	23.46	23.58	23.42	23.62	23.37	-0.05	0.56	0.67
CG17051	FBgn0015379	dod	FBgn0015379	1	17.52	17.46	17.77	17.66	17.45	17.34	-0.1	0.56	0.67
CG11397	FBgn0015391	glu	FBgn0015391	9	23.71	23.62	23.59	23.8	23.69	23.56	0.04	0.57	0.67
CG12082	FBgn0035402	Usp5	FBgn0035402	2	19.36	19.37	19.35	19.23	19.43	19.24	-0.06	0.57	0.67
CG3902	FBgn0036824	CG3902	FBgn0036824	5	22.07	22.24	22.42	22.44	22.17	22.32	0.07	0.57	0.67
CG11451	FBgn0037025	Spc105R	FBgn0037025	1	17.08	17.01	17.14	17.2	16.84	16.9	-0.1	0.57	0.67
CG2849	FBgn0015286	Rala	FBgn0015286	1	17.94	17.8	17.78	17.59	17.59	18.03	-0.1	0.57	0.67
CG8367	FBgn0000289	cg	FBgn0000289	2	19.7	19.79	19.75	19.92	19.65	19.85	0.06	0.57	0.67
CG13025	FBgn0036660	CG13025	FBgn0036660	1	19.67	19.35	19.59	19.98	19.28	18.83	-0.17	0.57	0.68
CG5483	FBgn0038816	Lrrk	FBgn0038816	1	23.27	23.09	23.33	23.43	23.18	23.25	0.05	0.57	0.68
CG6014	FBgn0261258	rgn	FBgn0261258	1	18.31	18.64	18.44	18.76	18.33	18.59	0.09	0.57	0.68
CG1430	FBgn0010292	bys	FBgn0010292	1	18.51	18.03	18.13	18.21	17.99	18.18	-0.1	0.57	0.68
CG3582	FBgn0017457	U2af38	FBgn0017457	3	22.93	23.05	23.08	22.94	22.91	23.09	-0.04	0.57	0.68
CG3455	FBgn0028685	Rpt4	FBgn0028685	13	24.17	24.16	24.25	24.37	24.09	23.93	-0.06	0.57	0.68
CG8351	FBgn0037632	CCT7	FBgn0037632	14	24.35	24.41	24.51	24.45	24.4	24.31	-0.04	0.57	0.68
CG8764	FBgn0011227	ox	FBgn0011227	1	20.89	20.52	20.71	20.58	20.53	20.81	-0.07	0.57	0.68
CG9738	FBgn0024326	Mkk4	FBgn0024326	3	20.71	20.16	20.23	20.66	20.3	20.43	0.1	0.57	0.68
CG5247	FBgn0011774	Irbp	FBgn0011774	6	21.62	21.41	21.68	21.65	21.55	21.67	0.05	0.57	0.68
CG10664	FBgn0032833	COX4	FBgn0032833	1	19.83	19.99	19.99	19.98	19.97	20.01	0.05	0.57	0.68
CG13240	FBgn0001989	ND-B17	FBgn0001989	2	20.55	20.67	20.75	20.78	20.66	20.67	0.05	0.58	0.68
CG6418	FBgn0036104	CG6418	FBgn0036104	3	19.46	19.44	19.49	19.36	19.6	19.62	0.06	0.58	0.68
CG6341	FBgn0028737	eEF1beta	FBgn0028737	9	25.72	25.87	25.92	25.94	25.82	25.86	0.04	0.58	0.69
CG6030	FBgn0016120	ATPsynD	FBgn0016120	7	24.56	24.9	24.83	24.78	24.7	24.66	-0.05	0.58	0.69
CG3204	FBgn0283666	Rap2l	FBgn0283666	2	19.78	19.68	19.72	19.66	19.61	19.76	-0.05	0.59	0.7
CG1360	FBgn0033195	CG1360	FBgn0033195	1	17.16	17.12	16.98	17.36	17.14	17.03	0.09	0.59	0.7
CG7484	FBgn0036745	CG7484	FBgn0036745	1	18.6	18.65	18.94	18.91	18.5	18.5	-0.09	0.6	0.7
CG2671	FBgn0002121	l(2)gl	FBgn0002121	2	19.54	19.08	19.2	19.55	19.3	19.22	0.09	0.6	0.7
CG10080	FBgn0034641	mahj	FBgn0034641	5	21.2	20.96	21.17	21.37	21.12	21.02	0.06	0.6	0.71
CG5821	FBgn0022985	qkr58E-2	FBgn0022985	1	18.98	19.21	19.29	16.89	19.64	19.64	-0.43	0.62	0.72
CG13367	FBgn0025634	CG13367	FBgn0025634	1	14.75	14.09	13.88	14.72	14.39	14.15	0.18	0.6	0.71
CG6049	FBgn0037081	barc	FBgn0037081	1	16.15	16.56	16.42	16.53	16.62	16.3	0.11	0.61	0.71
CG7903	FBgn0039730	CG7903	FBgn0039730	5	22.01	22.15	21.69	21.84	21.86	21.96	-0.06	0.61	0.71
CG11990	FBgn0037657	hyx	FBgn0037657	8	21.52	21.5	21.52	21.4	21.38	21.62	-0.04	0.61	0.71
CG31301	FBgn0051301	CG31301	FBgn0051301	2	20.63	20.8	20.87	20.91	20.63	20.94	0.06	0.61	0.71
CG8578	FBgn0030699	CG8578	FBgn0030699	1	17.9	17.59	17.88	17.7	17.48	17.92	-0.09	0.61	0.71
CG30084	FBgn0265991	Zasp52	FBgn0265991	8	23.44	23.23	23.43	23.46	23.34	23.42	0.04	0.61	0.71
CG4157	FBgn0028693	Rpn12	FBgn0028693	6	22.83	22.87	22.88	23.06	22.83	22.81	0.04	0.61	0.71
CG1898	FBgn0042712	HBS1	FBgn0042712	4	20.95	20.92	21.01	21	20.89	20.86	-0.04	0.61	0.71
CG31938	FBgn0260648	Rrp40	FBgn0260648	6	23.28	23.35	23.45	23.47	23.13	23.32	-0.05	0.61	0.71
CG4634	FBgn0016687	Nurf-38	FBgn0016687	7	22.65	23	22.74	22.51	22.94	22.74	-0.07	0.61	0.71
CG1956	FBgn0004636	Rap1	FBgn0004636	2	20.09	19.91	20.01	20.18	19.86	20.15	0.06	0.61	0.71
CG8900	FBgn0010411	RpS18	FBgn0010411	8	28.39	28.38	28.53	28.42	28.37	28.43	-0.03	0.61	0.71
CG9977	FBgn0035371	AhcyL1	FBgn0035371	2	19	19.12	19	18.99	19.2	19.1	0.06	0.61	0.72
CG33522	FBgn0261872	scaf6	FBgn0261872	2	18.85	18.95	18.7	19.03	18.71	18.52	-0.08	0.61	0.72
CG11963	FBgn0037643	ScsbetaA	FBgn0037643	3	20.65	20.51	20.82	20.91	20.65	20.61	0.06	0.61	0.72
CG1907	FBgn0039674	CG1907	FBgn0039674	2	19.25	19.09	19.3	19.14	19.31	19.38	0.06	0.61	0.72
CG8902	FBgn0031886	Nuf2	FBgn0031886	1	19.33	18.86	19.18	19.15	18.85	19.13	-0.08	0.62	0.72
CG8675	FBgn0030834	CG8675	FBgn0030834	1	18.8	18.73	18.73	18.8	18.77	18.86	0.06	0.62	0.72
CG1142	FBgn0037504	CG1142	FBgn0037504	4	22.53	22.83	22.72	22.66	22.89	22.69	0.05	0.62	0.72
CG32708	FBgn0052708	CG32708	FBgn0052708	1	18.11	18	18.09	18.1	17.89	18.01	-0.07	0.62	0.72
CG11888	FBgn0028692	Rpn2	FBgn0028692	24	25.49	25.59	25.56	25.74	25.55	25.47	0.04	0.62	0.72
CG4769	FBgn0035600	Cyt-c1	FBgn0035600	1	18.04	17.88	18.23	17.96	18.04	18.4	0.09	0.62	0.72
CG12306	FBgn0003124	polo	FBgn0003124	6	22.33	22.3	22.22	22.21	22.33	22.45	0.04	0.62	0.72
CG14625	FBgn0040358	CG14625	FBgn0040358	1	17.98	17.98	17.97	17.92	17.91	17.92	-0.06	0.62	0.72
CG9577	FBgn0031092	CG9577	FBgn0031092	1	16.78	17.32	16.61	16.05	17.31	16.81	-0.18	0.62	0.72
CG8201	FBgn0260934	par-1	FBgn0260934	6	21.83	21.65	21.76	21.75	21.77	21.83	0.04	0.62	0.72
CG6375	FBgn0266581	pit	FBgn0266581	12	23.77	23.85	23.75	23.69	23.75	23.84	-0.03	0.62	0.72
CG5184	FBgn0038474	mRpS11	FBgn0038474	2	21.16	21.06	21.13	20.95	21.2	21.06	-0.04	0.62	0.72
CG41099	FBgn0039955	CG41099	FBgn0039955	3	20.75	20.46	20.9	20.66	20.63	20.64	-0.06	0.62	0.72
CG31251	FBgn0051251	CG31251	FBgn0051251	12	27.29	27.12	27.21	27.23	27.12	27.18	-0.03	0.63	0.72
CG7839	FBgn0036124	CG7839	FBgn0036124	5	21.92	21.83	21.66	21.85	21.84	21.56	-0.05	0.63	0.73
CG6822	FBgn0035909	ergic53	FBgn0035909	10	24.14	24.07	24.06	24.14	24	24.04	-0.03	0.63	0.73
CG12157	FBgn0016041	Tom40	FBgn0016041	1	18.27	18.49	19.36	19.24	18.06	18.2	-0.2	0.64	0.74
CG4400	FBgn0030434	Brms1	FBgn0030434	2	19	18.83	19.12	19.21	18.96	18.97	0.06	0.64	0.74
CG14813	FBgn0028969	deltaCOP	FBgn0028969	7	23.33	23.22	23.18	23.46	23.24	23.17	0.04	0.64	0.74
CG9423	FBgn0027338	Kap-alpha3	FBgn0027338	6	23.88	23.88	24.08	24.08	23.92	23.96	0.04	0.64	0.74
CG17121	FBgn0039043	CG17121	FBgn0039043	1	18.23	18.51	18.74	18.24	18.95	18.61	0.1	0.64	0.74
CG12876	FBgn0086346	ALiX	FBgn0086346	1	17.04	17.37	17.9	17.69	17.34	17.61	0.12	0.64	0.74
CG9198	FBgn0004391	shtd	FBgn0004391	1	18.12	17.97	17.95	18.13	17.8	17.91	-0.07	0.64	0.74
CG1938	FBgn0030276	Dlic	FBgn0030276	4	20.65	20.57	20.68	20.73	20.8	20.52	0.05	0.64	0.74
CG8893	FBgn0001092	Gapdh2	FBgn0001092	2	22.87	22.9	23.1	22.9	22.96	22.9	-0.04	0.64	0.74
CG9921	FBgn0030743	CG9921	FBgn0030743	1	17.01	16.81	16.83	16.39	17.17	16.76	-0.11	0.65	0.74
CG13197	FBgn0062449	CG13197	FBgn0062449	1	18.09	18.29	18.25	18.19	18.42	18.21	0.06	0.65	0.74
CG10159	FBgn0015602	BEAF-32	FBgn0015602	2	20.09	20.63	20.3	19.8	22.6	19.8	0.39	0.66	0.75
CG6386	FBgn0027889	ball	FBgn0027889	1	19.38	19.29	19.36	19.31	19.71	19.22	0.07	0.65	0.74
CG8415	FBgn0033912	RpS23	FBgn0033912	6	26.57	26.67	26.74	26.57	26.69	26.82	0.04	0.65	0.74
CG8049	FBgn0003502	Btk29A	FBgn0003502	1	16.21	16.04	17.12	16.7	16.41	16.7	0.14	0.65	0.75
CG1059	FBgn0087013	Karybeta3	FBgn0087013	18	24.52	24.59	24.64	24.67	24.59	24.57	0.03	0.65	0.75
CG1785	FBgn0030061	CG1785	FBgn0030061	11	23.63	23.71	23.55	23.35	23.85	23.91	0.07	0.66	0.75
CG5057	FBgn0036581	MED10	FBgn0036581	1	18.82	19	19.3	18.79	18.99	19.12	-0.07	0.65	0.75
CG13628	FBgn0039218	Rpb10	FBgn0039218	2	21.9	21.83	21.87	21.92	21.73	21.84	-0.03	0.66	0.75
CG4865	FBgn0026085	dgt4	FBgn0026085	1	17.43	17.52	17.62	17.62	17.29	17.44	-0.07	0.66	0.75
CG11710	FBgn0031115	CG11710	FBgn0031115	1	18.57	18.44	18.55	18.75	18.36	18.65	0.06	0.66	0.75
CG7382	FBgn0031708	CG7382	FBgn0031708	1	19	18.81	18.79	19.23	18.15	18.87	-0.12	0.66	0.75
CG7139	FBgn0027532	CG7139	FBgn0027532	25	28.02	27.93	28.13	28.26	27.84	28.14	0.05	0.67	0.76
CG14544	FBgn0039407	CG14544	FBgn0039407	1	17.43	17.14	17.65	17.13	17.44	17.4	-0.09	0.66	0.75
CG8566	FBgn0267002	unc-104	FBgn0267002	4	19.65	19.77	19.79	19.91	19.49	19.62	-0.06	0.66	0.75
CG2662	FBgn0024993	CG2662	FBgn0024993	3	20.72	20.93	20.76	20.79	20.77	20.73	-0.04	0.66	0.75
CG8190	FBgn0034029	eIF2Bgamma	FBgn0034029	6	21.78	21.91	21.82	21.96	21.74	21.92	0.04	0.66	0.75
CG40494	FBgn0025836	RhoGAP1A	FBgn0025836	1	20.11	20.07	20.39	20.54	20.26	19.33	-0.14	0.67	0.76
CG6025	FBgn0000115	Arl1	FBgn0000115	1	18.12	18.29	18.29	18.65	17.84	17.91	-0.1	0.67	0.76
CG3810	FBgn0023511	Edem1	FBgn0023511	1	17.74	17.7	17.61	17.72	17.85	17.67	0.06	0.67	0.76
CG11886	FBgn0041186	Slbp	FBgn0041186	3	21.34	21.52	21.32	21.31	21.39	21.39	-0.04	0.67	0.76
CG17177	FBgn0036440	CG17177	FBgn0036440	2	17.71	17.67	17.87	18.12	17.76	17.6	0.08	0.67	0.76
CG1677	FBgn0029941	CG1677	FBgn0029941	6	22.48	22.41	22.46	22.44	22.48	22.51	0.03	0.67	0.76
CG1770	FBgn0041210	HDAC4	FBgn0041210	2	18.88	18.57	18.97	18.96	18.81	18.84	0.06	0.67	0.76
CG43140	FBgn0262614	pyd	FBgn0262614	3	20.74	21.09	20.98	20.84	21.18	20.96	0.05	0.67	0.76
CG11015	FBgn0031830	COX5B	FBgn0031830	1	20.48	20.49	20.09	20.31	20.29	20.29	-0.05	0.68	0.77
CG15010	FBgn0041171	ago	FBgn0041171	1	17.36	17.5	17.99	15.37	17.93	18.49	-0.35	0.69	0.78
CG1569	FBgn0003268	rod	FBgn0003268	7	20.53	21.05	20.83	20.72	20.8	20.71	-0.06	0.69	0.78
CG5366	FBgn0027568	Cand1	FBgn0027568	26	24.59	24.64	24.61	24.64	24.59	24.56	-0.02	0.69	0.78
CG9911	FBgn0030734	CG9911	FBgn0030734	3	21.21	21.26	21.26	21.47	21.12	21.26	0.04	0.69	0.78
CG2129	FBgn0030008	CG2129	FBgn0030008	2	19.7	19.61	19.52	19.9	19.79	18.77	-0.12	0.7	0.78
CG17271	FBgn0038829	CG17271	FBgn0038829	1	15.53	13.49	14.19	15.28	14.32	14.29	0.23	0.69	0.78
CG5548	FBgn0030605	ND-B18	FBgn0030605	2	20.24	20.06	20.28	20.48	20.12	20.13	0.05	0.69	0.78
CG2957	FBgn0037529	mRpS9	FBgn0037529	3	19.69	20.08	19.61	19.78	19.53	19.88	-0.06	0.69	0.78
CG12864	FBgn0026427	Su(var)2-HP2	FBgn0026427	1	17.88	17.95	17.78	17.87	17.84	18.07	0.06	0.7	0.78
CG31712	FBgn0051712	CG31712	FBgn0051712	2	20.35	20.38	20.41	20.47	20.31	20.26	-0.04	0.7	0.78
CG10347	FBgn0030342	CG10347	FBgn0030342	3	20.76	20.53	20.65	20.62	20.55	20.67	-0.04	0.7	0.78
CG8322	FBgn0020236	ATPCL	FBgn0020236	18	23.72	23.89	23.88	23.92	23.87	23.78	0.03	0.7	0.78
CG9677	FBgn0025582	eIF3e	FBgn0025582	12	24.42	24.3	24.39	24.45	24.33	24.39	0.02	0.7	0.78
CG3249	FBgn0263987	spoon	FBgn0263987	2	21.55	21.51	21.58	21.54	21.61	21.58	0.03	0.7	0.79
CG15929	FBgn0029800	lin-52	FBgn0029800	2	19.29	19.2	19.32	19.39	18.88	19.34	-0.06	0.7	0.79
CG9351	FBgn0024555	flfl	FBgn0024555	6	21.51	21.59	21.55	21.46	21.65	21.44	-0.03	0.7	0.79
CG5108	FBgn0032236	mRpS7	FBgn0032236	3	21.12	20.88	20.79	20.7	20.94	21.02	-0.05	0.7	0.79
CG9091	FBgn0030616	RpL37a	FBgn0030616	1	25.17	25.05	25.09	25.14	25.14	25.09	0.02	0.7	0.79
CG11242	FBgn0034451	TBCB	FBgn0034451	1	17	17.56	17.45	17.29	17.4	17.54	0.08	0.7	0.79
CG10228	FBgn0264962	Pcf11	FBgn0264962	4	21.47	21.7	21.54	21.53	21.77	21.53	0.04	0.71	0.79
CG9099	FBgn0030802	DENR	FBgn0030802	1	19.02	19.05	18.74	18.49	19.06	19.04	-0.07	0.71	0.79
CG16935	FBgn0033883	CG16935	FBgn0033883	1	18.95	18.62	18.98	18.62	18.72	19.02	-0.06	0.71	0.79
CG6546	FBgn0025716	Bap55	FBgn0025716	2	18.98	18.94	19.07	19.25	18.91	18.99	0.05	0.71	0.79
CG11006	FBgn0262714	Sap130	FBgn0262714	1	18.05	18.52	18.13	18.58	17.67	18.16	-0.1	0.71	0.79
CG7637	FBgn0033548	CG7637	FBgn0033548	1	21.14	21.25	21.07	21.47	21.05	21.07	0.05	0.71	0.79
CG4086	FBgn0004465	Su(P)	FBgn0004465	1	19.18	19.02	19.09	19.2	19.02	18.93	-0.05	0.71	0.79
CG34422	FBgn0085451	htk	FBgn0085451	1	15.72	15.64	15.38	15.8	15.37	15.84	0.09	0.71	0.79
CG15889	FBgn0038128	Ravus	FBgn0038128	1	15.66	15.51	15.36	15.3	15.23	15.73	-0.09	0.71	0.79
CG7993	FBgn0038585	Non3	FBgn0038585	2	21.97	22	21.93	21.85	21.98	21.99	-0.03	0.71	0.79
CG8298	FBgn0033673	CG8298	FBgn0033673	3	20.58	20.34	20.5	20.89	20.05	20.24	-0.08	0.72	0.8
CG44015	FBgn0264785	Hph	FBgn0264785	1	18.4	18.57	17.44	17.89	18.67	18.23	0.13	0.72	0.8
CG6840	FBgn0032634	Rpb11	FBgn0032634	3	20.91	21.14	20.85	20.95	21.05	20.78	-0.04	0.72	0.8
CG3637	FBgn0025865	Cortactin	FBgn0025865	1	19.71	19.65	19.47	19.6	19.56	19.82	0.04	0.72	0.8
CG31132	FBgn0011785	BRWD3	FBgn0011785	1	15.07	15.79	15.91	15.55	15.89	15.64	0.11	0.72	0.8
CG2982	FBgn0266570	NO66	FBgn0266570	5	22.21	22.49	21.99	22.25	22.15	22.15	-0.05	0.72	0.8
CG42684	FBgn0261570	raskol	FBgn0261570	1	17.97	17.59	17.8	17.75	17.56	17.87	-0.06	0.72	0.8
CG4013	FBgn0265523	Smr	FBgn0265523	1	15.67	15.6	15.6	15.89	15.26	15.45	-0.09	0.72	0.8
CG15160	FBgn0032688	CG15160	FBgn0032688	5	24.31	24.01	24.03	24.28	24.07	24.1	0.04	0.73	0.8
CG1697	FBgn0030318	rho-4	FBgn0030318	1	16.75	16.58	17.13	16.5	16.98	16.74	-0.08	0.73	0.8
CG6647	FBgn0004363	porin	FBgn0004363	10	22.8	22.97	22.99	23.01	22.88	22.95	0.03	0.73	0.8
CG13220	FBgn0033608	CG13220	FBgn0033608	2	20.1	20.14	20.18	20.23	20.08	20.2	0.03	0.73	0.81
CG6501	FBgn0034243	Ns2	FBgn0034243	14	24.51	24.62	24.46	24.21	24.88	24.69	0.06	0.73	0.81
CG42250	FBgn0261279	lqfR	FBgn0261279	4	19.98	19.97	20.4	20.23	19.88	20.44	0.06	0.73	0.81
CG7725	FBgn0036697	rogdi	FBgn0036697	2	20.32	20.26	20.2	20.56	19.9	20.15	-0.06	0.73	0.81
CG13779	FBgn0266666	Sem1	FBgn0266666	1	17.42	17.49	17.37	17.74	17.32	17.4	0.06	0.73	0.81
CG42632	FBgn0261380	mRpL37	FBgn0261380	1	17.87	17.54	18.07	17.79	17.81	18.07	0.06	0.73	0.81
CG5193	FBgn0004915	TfIIB	FBgn0004915	7	22.89	22.92	22.75	22.83	22.85	22.82	-0.02	0.73	0.81
CG2097	FBgn0037371	Sym	FBgn0037371	7	21.66	21.77	21.66	21.81	21.68	21.67	0.03	0.74	0.81
CG8833	FBgn0036386	CG8833	FBgn0036386	2	19.97	20.43	19.98	20.17	20.19	19.88	-0.05	0.74	0.82
CG17593	FBgn0031544	CG17593	FBgn0031544	7	21.98	22	22.01	21.99	21.91	22.02	-0.02	0.74	0.82
CG2803	FBgn0035083	Tina-1	FBgn0035083	1	18.06	18.19	18.32	18.23	18.09	18.12	-0.04	0.75	0.82
CG12101	FBgn0015245	Hsp60A	FBgn0015245	31	26.76	26.77	26.86	26.95	26.78	26.73	0.02	0.75	0.82
CG7070	FBgn0267385	PyK	FBgn0267385	19	25.87	25.86	25.9	25.85	25.9	25.91	0.01	0.75	0.82
CG8269	FBgn0021825	DCTN2-p50	FBgn0021825	7	22.37	22.74	22.63	22.63	22.47	22.53	-0.03	0.75	0.82
CG5252	FBgn0037894	Ranbp9	FBgn0037894	17	23.93	23.99	23.98	24.06	23.85	23.91	-0.02	0.75	0.82
CG42630	FBgn0261353	Ccdc56	FBgn0261353	2	21.24	20.92	21.12	21.27	20.82	21.05	-0.04	0.75	0.83
CG4201	FBgn0024222	IKKbeta	FBgn0024222	2	17.07	20.65	16.52	17.64	16.84	18.59	-0.39	0.76	0.83
CG30410	FBgn0050410	Rpi	FBgn0050410	2	19.45	19.65	19.61	19.78	19.37	19.43	-0.04	0.76	0.83
CG5654	FBgn0022959	yps	FBgn0022959	10	25.62	25.53	25.66	25.47	25.61	25.67	-0.02	0.76	0.83
CG5602	FBgn0262619	DNAlig1	FBgn0262619	1	18.12	18.36	17.96	18.2	18.3	17.76	-0.06	0.76	0.83
CG12261	FBgn0039555	mRpS22	FBgn0039555	4	20.5	20.19	20.49	20.39	20.38	20.52	0.03	0.76	0.83
CG11184	FBgn0034923	Upf3	FBgn0034923	3	20.46	20.57	20.39	20.54	20.38	20.42	-0.03	0.76	0.83
CG5809	FBgn0025678	CaBP1	FBgn0025678	9	25.6	25.64	25.62	25.7	25.54	25.57	-0.02	0.76	0.83
CG6814	FBgn0020407	asun	FBgn0020407	1	19.14	19.24	18.96	19.65	18.98	18.91	0.07	0.76	0.83
CG16724	FBgn0003741	tra	FBgn0003741	1	19.3	19.39	19.14	19.3	19.36	19.04	-0.04	0.76	0.83
CG6249	FBgn0032346	Csl4	FBgn0032346	2	19.73	19.54	19.9	19.81	19.79	19.69	0.04	0.77	0.84
CG1341	FBgn0028687	Rpt1	FBgn0028687	14	24.35	24.38	24.38	24.54	24.31	24.32	0.02	0.77	0.84
CG8025	FBgn0036916	Mtr3	FBgn0036916	6	21.72	21.86	21.8	21.85	21.84	21.77	0.02	0.77	0.84
CG11414	FBgn0035024	CG11414	FBgn0035024	2	19.7	19.67	19.32	19.65	19.61	19.53	0.04	0.77	0.84
CG33714	FBgn0064117	SLIRP1	FBgn0064117	4	21.14	21.37	21.19	20.82	21.38	21.36	-0.05	0.77	0.84
CG17514	FBgn0287182	l(3)80Fj	FBgn0287182	5	19.36	19.52	19.61	19.62	19.64	19.34	0.04	0.77	0.84
CG16753	FBgn0035393	CG16753	FBgn0035393	4	24.1	24	24.01	24.05	23.9	24.09	-0.02	0.78	0.84
CG1618	FBgn0000346	comt	FBgn0000346	2	19.05	19.55	19.16	19.67	18.91	19.36	0.06	0.78	0.85
CG31548	FBgn0051548	CG31548	FBgn0051548	2	20.83	20.99	21.02	21.1	20.9	20.91	0.03	0.78	0.85
CG7261	FBgn0027509	TBCD	FBgn0027509	4	19.93	19.98	20.12	20.06	19.86	20.03	-0.03	0.78	0.85
CG4579	FBgn0021761	Nup154	FBgn0021761	6	21.54	21.71	21.56	21.66	21.55	21.66	0.02	0.78	0.85
CG4532	FBgn0029903	pod1	FBgn0029903	2	19.53	19.38	19.52	19.22	19.54	19.57	-0.04	0.78	0.85
CG12096	FBgn0030457	CG12096	FBgn0030457	2	19.79	20	20.11	20.12	19.86	19.81	-0.04	0.78	0.85
CG32418	FBgn0052418	vito	FBgn0052418	3	21.73	21.75	21.5	21.66	21.71	21.68	0.02	0.78	0.85
CG14616	FBgn0027279	l(1)G0196	FBgn0027279	3	19.53	19.57	19.59	19.77	19.44	19.58	0.03	0.79	0.85
CG4045	FBgn0025629	CG4045	FBgn0025629	1	18.6	18.99	18.85	18.81	19.01	18.74	0.04	0.79	0.85
CG32626	FBgn0052626	AMPdeam	FBgn0052626	4	19.74	20.05	20.12	20.18	20.01	19.84	0.04	0.79	0.85
CG43657	FBgn0263705	Myo10A	FBgn0263705	2	17.81	17.71	17.83	17.76	17.69	17.8	-0.04	0.79	0.85
CG11448	FBgn0024985	Rilpl	FBgn0024985	1	16.58	16.98	16.87	16.51	17.04	17.06	0.06	0.79	0.85
CG13570	FBgn0015544	spag	FBgn0015544	5	20.38	20.4	20.48	20.54	20.38	20.41	0.02	0.79	0.85
CG3918	FBgn0029873	CG3918	FBgn0029873	1	20.47	20.15	20.39	20.42	20.38	20.11	-0.03	0.79	0.85
CG4414	FBgn0040091	Ugt317A1	FBgn0040091	1	16.51	17.43	16.8	17.37	16.36	16.74	-0.09	0.79	0.85
CG9191	FBgn0004378	Klp61F	FBgn0004378	12	23.29	23.17	23.28	23.32	23.18	23.18	-0.02	0.79	0.85
CG8798	FBgn0036892	Lon	FBgn0036892	4	19.51	19.54	19.46	19.42	19.53	19.49	-0.03	0.79	0.85
CG10986	FBgn0001087	g	FBgn0001087	7	22.59	22.54	22.32	22.33	22.64	22.57	0.03	0.79	0.85
CG4729	FBgn0036623	Agpat3	FBgn0036623	2	18.63	19.49	19.38	19.16	19.17	18.99	-0.06	0.8	0.86
CG10811	FBgn0023213	eIF4G1	FBgn0023213	12	22.56	22.56	22.48	22.58	22.56	22.51	0.02	0.8	0.86
CG7033	FBgn0030086	CCT2	FBgn0030086	19	24.86	24.99	24.96	24.98	24.97	24.81	-0.02	0.8	0.86
CG15016	FBgn0035534	mRpS6	FBgn0035534	1	16.72	18.67	18.6	18.75	17.72	17.99	0.16	0.81	0.86
CG5433	FBgn0010235	Klc	FBgn0010235	12	24.54	24.36	24.65	24.53	24.53	24.54	0.02	0.8	0.86
CG4584	FBgn0250837	dUTPase	FBgn0250837	2	21.99	21.95	22.16	22.4	22.07	21.76	0.04	0.81	0.86
CG9018	FBgn0035318	CG9018	FBgn0035318	6	23.97	23.94	23.83	23.84	23.98	23.88	-0.02	0.8	0.86
CG13994	FBgn0031772	CG13994	FBgn0031772	1	17.38	17.15	17.26	17.12	17.37	17.43	0.04	0.8	0.86
CG17520	FBgn0264492	CkIIalpha	FBgn0264492	16	27.25	27.17	27.25	27.14	27.24	27.33	0.01	0.8	0.86
CG2846	FBgn0014930	CG2846	FBgn0014930	3	19.28	19.15	19.15	19.24	19.38	19.04	0.03	0.81	0.86
CG5562	FBgn0024234	gbb	FBgn0024234	1	17.7	17.44	17.29	17.58	17.28	17.71	0.05	0.81	0.87
CG12065	FBgn0030052	CG12065	FBgn0030052	1	17.32	17.6	17.28	17.4	17.43	17.49	0.04	0.81	0.87
CG4169	FBgn0250814	UQCR-C2	FBgn0250814	17	25.74	25.84	25.85	25.85	25.83	25.79	0.01	0.81	0.87
CG8142	FBgn0030871	CG8142	FBgn0030871	3	21.05	20.94	21	21.04	20.96	21.05	0.02	0.81	0.87
CG6020	FBgn0037001	ND-39	FBgn0037001	8	21.8	22.59	22.01	22	22.2	22.35	0.05	0.82	0.87
CG17158	FBgn0011570	cpb	FBgn0011570	1	18.19	18.35	18.15	18.11	18.89	17.89	0.06	0.81	0.87
CG31549	FBgn0051549	CG31549	FBgn0051549	1	16.34	17.04	16.85	16.96	16.34	16.74	-0.06	0.82	0.87
CG13914	FBgn0035209	msd1	FBgn0035209	1	17.23	17.02	17.06	17.37	17	16.8	-0.05	0.82	0.87
CG1890	FBgn0039869	CG1890	FBgn0039869	1	18.67	18.54	18.81	18.95	18.6	18.57	0.04	0.82	0.87
CG5824	FBgn0010926	l(3)07882	FBgn0010926	12	23.82	23.81	23.78	23.77	23.75	23.86	-0.01	0.82	0.87
CG8556	FBgn0014011	Rac2	FBgn0014011	1	18.16	18.22	18.04	18.41	18.14	17.98	0.04	0.82	0.87
CG3633	FBgn0034727	mRpS29	FBgn0034727	4	20.96	20.81	21.03	21.12	20.87	20.88	0.02	0.82	0.87
CG7340	FBgn0040493	grsm	FBgn0040493	2	19.36	19.38	19.38	19.55	19.24	19.24	-0.03	0.82	0.87
CG7528	FBgn0029113	Uba2	FBgn0029113	2	20.7	20.46	20.7	20.76	20.63	20.54	0.02	0.82	0.87
CG4204	FBgn0023212	EloB	FBgn0023212	2	19.77	19.99	19.82	20.03	19.73	19.9	0.03	0.82	0.87
CG10602	FBgn0032721	CG10602	FBgn0032721	1	18.25	18.52	18.71	18.7	18.31	18.36	-0.04	0.83	0.88
CG4247	FBgn0038307	mRpS10	FBgn0038307	3	20.55	20.56	20.61	20.64	20.47	20.55	-0.02	0.83	0.88
CG5887	FBgn0086687	Desat1	FBgn0086687	2	19.07	19.25	18.79	19.06	19.1	19.03	0.03	0.83	0.88
CG34415	FBgn0085444	mute	FBgn0085444	1	19.88	22.71	20.27	22.72	21.2	17.97	-0.32	0.84	0.89
CG8395	FBgn0034065	Rrp42	FBgn0034065	4	21.49	21.47	21.51	21.6	21.35	21.45	-0.02	0.84	0.89
CG32251	FBgn0052251	Claspin	FBgn0052251	1	17.88	17.75	17.52	17.71	17.76	17.59	-0.03	0.84	0.89
CG10343	FBgn0032703	CG10343	FBgn0032703	1	15.27	16.1	16.84	15.89	16.27	16.29	0.08	0.84	0.89
CG11847	FBgn0259152	Clbn	FBgn0259152	4	21.61	21.47	22.05	22.05	21.35	21.88	0.05	0.84	0.89
CG12055	FBgn0001091	Gapdh1	FBgn0001091	3	17.78	20.21	20.01	17.41	20.3	19.65	-0.21	0.85	0.89
CG43783	FBgn0264305	CG43783	FBgn0264305	1	14.48	14.61	13.83	14.46	14.36	14.29	0.06	0.84	0.89
CG1167	FBgn0003206	Ras64B	FBgn0003206	1	19.41	19.55	19.18	19.37	19.28	19.41	-0.03	0.84	0.89
CG42615	FBgn0261267	CG42615	FBgn0261267	2	19.43	19.39	19.33	19.53	19.35	19.34	0.02	0.84	0.89
CG8715	FBgn0020279	lig	FBgn0020279	9	25.06	25.12	24.96	25.03	25.07	25.01	-0.01	0.84	0.89
CG12505	FBgn0033926	Arc1	FBgn0033926	2	20.49	20.5	20.69	20.74	20.37	20.64	0.02	0.84	0.89
CG11901	FBgn0029176	eEF1gamma	FBgn0029176	12	25.82	25.83	25.93	25.9	25.84	25.8	-0.01	0.84	0.89
CG7361	FBgn0021906	RFeSP	FBgn0021906	1	20.44	19.65	19.75	19.06	20.46	20.61	0.1	0.85	0.89
CG2835	FBgn0001123	Galphas	FBgn0001123	2	19.83	19.86	19.63	19.85	19.71	19.83	0.02	0.85	0.89
CG2064	FBgn0033205	CG2064	FBgn0033205	1	19.07	18.69	18.87	18.97	18.74	18.83	-0.03	0.85	0.89
CG6525	FBgn0082831	pps	FBgn0082831	3	19.81	20.11	19.69	18.97	20.29	20.6	0.09	0.85	0.9
CG32346	FBgn0000541	E(bx)	FBgn0000541	14	23.09	22.98	23	23.01	23	23.09	0.01	0.85	0.89
CG1345	FBgn0039580	Gfat2	FBgn0039580	1	17.8	18.09	17.72	17.75	17.95	18	0.03	0.85	0.89
CG32529	FBgn0052529	Hers	FBgn0052529	1	16.56	16.83	15.94	16.63	16.56	15.97	-0.06	0.85	0.89
CG5032	FBgn0026309	aft	FBgn0026309	1	16.32	16.48	16.26	16.37	16.34	16.26	-0.03	0.85	0.89
CG5380	FBgn0038951	CG5380	FBgn0038951	1	17.63	17.64	18.02	17.85	17.69	17.67	-0.03	0.85	0.89
CG10669	FBgn0039329	CG10669	FBgn0039329	1	14.73	14.82	14.84	15.34	14.25	14.99	0.06	0.85	0.89
CG31155	FBgn0051155	Rpb7	FBgn0051155	1	19.73	19.55	19.54	19.76	19.34	19.8	0.03	0.85	0.89
CG5384	FBgn0032216	Usp14	FBgn0032216	2	19.78	19.43	19.94	19.98	19.6	19.66	0.03	0.85	0.9
CG7870	FBgn0261020	wol	FBgn0261020	1	18.08	18.79	18.48	19.09	17.79	18.27	-0.07	0.86	0.9
CG4735	FBgn0003401	shu	FBgn0003401	1	19.2	18.97	18.96	18.86	18.93	19.26	-0.03	0.86	0.9
CG13365	FBgn0029529	CG13365	FBgn0029529	1	18.29	18.39	18.48	18.7	18.2	18.35	0.03	0.86	0.9
CG6203	FBgn0028734	Fmr1	FBgn0028734	9	22.99	22.75	22.92	22.8	22.98	22.91	0.02	0.86	0.9
CG3566	FBgn0029854	CG3566	FBgn0029854	1	18.83	19.15	18.48	18.67	18.88	18.82	-0.03	0.86	0.9
CG10324	FBgn0038454	CG10324	FBgn0038454	11	23.68	23.65	23.83	23.87	23.53	23.71	-0.02	0.86	0.9
CG16932	FBgn0035060	Eps-15	FBgn0035060	21	27.68	27.83	27.64	27.68	27.72	27.78	0.01	0.86	0.9
CG15877	FBgn0035337	CG15877	FBgn0035337	2	24.12	24.02	24.01	24.03	24.09	24.06	0.01	0.86	0.9
CG7834	FBgn0039697	CG7834	FBgn0039697	1	18.57	18.55	18.65	19.09	18.39	18.17	-0.04	0.86	0.9
CG3508	FBgn0038251	Hexim	FBgn0038251	2	20.21	20.01	19.68	19.91	20.01	20.06	0.03	0.86	0.9
CG11190	FBgn0030035	PIG-T	FBgn0030035	2	19.52	18.11	18.1	19.24	18.5	18.22	0.08	0.87	0.9
CG9829	FBgn0086371	poly	FBgn0086371	1	17.93	18.06	17.75	17.64	17.99	18.03	-0.03	0.87	0.9
CG2508	FBgn0032863	Cdc23	FBgn0032863	2	19.4	19.94	19.79	19.68	19.7	19.68	-0.02	0.87	0.9
CG10701	FBgn0011661	Moe	FBgn0011661	4	21.34	21.48	21.49	21.29	21.49	21.48	-0.01	0.87	0.9
CG10203	FBgn0028554	x16	FBgn0028554	6	26.03	26.12	26.01	25.92	26.05	26.16	-0.01	0.87	0.9
CG10375	FBgn0039116	CG10375	FBgn0039116	1	19	19.1	19.1	18.95	18.96	19.22	-0.02	0.87	0.9
CG4832	FBgn0013765	cnn	FBgn0013765	2	17.84	17.92	18.18	18.09	17.86	18.06	0.02	0.87	0.91
CG7488	FBgn0038106	CG7488	FBgn0038106	1	18.95	18.14	17.69	18.36	18.17	18.1	-0.05	0.88	0.91
CG2048	FBgn0002413	dco	FBgn0002413	2	18.32	18.24	18.71	17.59	19.35	18.53	0.07	0.88	0.92
CG17023	FBgn0024804	Dbp80	FBgn0024804	2	19.71	19.95	19.89	20.04	19.86	19.7	0.02	0.88	0.92
CG3944	FBgn0017567	ND-23	FBgn0017567	3	21.29	21.63	21.49	21.52	21.41	21.45	-0.01	0.88	0.92
CG5166	FBgn0041188	Atx2	FBgn0041188	6	22.21	22.19	22.21	22.2	22.13	22.3	0.01	0.89	0.92
CG33105	FBgn0053105	p24-2	FBgn0053105	1	21.44	21.66	21.47	21.45	21.61	21.48	-0.01	0.89	0.92
CG4912	FBgn0032198	eEF1delta	FBgn0032198	9	25.11	25.18	25.12	25.09	25.09	25.26	0.01	0.89	0.92
CG32068	FBgn0052068	Adi1	FBgn0052068	3	20.88	20.98	20.99	21.05	20.89	20.94	0.01	0.89	0.92
CG16788	FBgn0037707	RnpS1	FBgn0037707	2	22.73	22.92	22.62	22.46	22.91	22.84	-0.02	0.89	0.92
CG3584	FBgn0022984	qkr58E-3	FBgn0022984	2	19.79	19.73	19.75	19.68	19.72	19.91	0.01	0.9	0.92
CG1939	FBgn0037469	Dpck	FBgn0037469	1	18.32	18.3	18.67	18.75	18.16	18.3	-0.03	0.9	0.92
CG11840	FBgn0031260	Spp	FBgn0031260	1	20.08	19.65	19.59	19.96	19.6	19.82	0.02	0.9	0.93
CG3959	FBgn0011207	pelo	FBgn0011207	1	17.96	17.71	18.14	18.11	17.82	17.95	0.02	0.9	0.93
CG10192	FBgn0260634	eIF4G2	FBgn0260634	1	17.13	17.68	17.24	17.68	17.42	17.05	0.03	0.9	0.93
CG12357	FBgn0022943	Cbp20	FBgn0022943	1	18.75	19.02	19.85	19.42	18.97	19.13	-0.04	0.91	0.93
CG2262	FBgn0025800	Smox	FBgn0025800	1	18.64	18.81	18.87	18.94	18.64	18.79	0.02	0.91	0.93
CG43398	FBgn0263289	scrib	FBgn0263289	1	17.99	17.97	17.89	17.76	17.99	18.05	-0.02	0.91	0.93
CG5056	FBgn0032231	CG5056	FBgn0032231	2	19.64	19.95	19.61	19.88	19.71	19.57	-0.02	0.91	0.94
CG1837	FBgn0030329	prtp	FBgn0030329	14	24.8	24.81	24.88	24.93	24.74	24.81	-0.01	0.91	0.94
CG17509	FBgn0260012	pds5	FBgn0260012	2	19.05	18.99	18.87	19.39	19.01	18.44	-0.03	0.92	0.94
CG32604	FBgn0026713	l(1)G0007	FBgn0026713	4	20.97	20.26	19.66	19.84	20.03	20.88	-0.05	0.92	0.94
CG5643	FBgn0027492	wdb	FBgn0027492	2	19.52	19.42	19.36	19.85	19.29	19.21	0.02	0.92	0.94
CG2031	FBgn0037382	Hpr1	FBgn0037382	3	20.2	20.49	20.19	20.78	19.88	20.15	-0.02	0.92	0.94
CG2910	FBgn0027548	nito	FBgn0027548	21	26.68	26.68	26.61	26.62	26.67	26.67	0	0.92	0.94
CG17654	FBgn0000579	Eno	FBgn0000579	1	18.03	17.78	17.65	18.14	17.61	17.66	-0.02	0.92	0.94
CG1943	FBgn0037468	CG1943	FBgn0037468	2	22.12	21.75	21.43	21.68	21.32	22.21	-0.03	0.92	0.94
CG5604	FBgn0032208	Ufd4	FBgn0032208	2	18.82	18.68	18.74	18.83	18.67	18.78	0.01	0.92	0.94
CG15602	FBgn0030694	CG15602	FBgn0030694	14	26.36	26.3	26.52	26.53	26.24	26.38	-0.01	0.92	0.94
CG4933	FBgn0283681	Tcs3	FBgn0283681	1	17.84	17.81	17.67	18.24	17.98	17	-0.03	0.92	0.95
CG10139	FBgn0033951	CG10139	FBgn0033951	1	18.84	18.83	18.4	18.28	19.26	18.62	0.03	0.93	0.95
CG7038	FBgn0029718	mRpL30	FBgn0029718	2	18.54	19.14	19.38	18.87	19.17	19.08	0.02	0.93	0.95
CG9291	FBgn0266711	EloC	FBgn0266711	1	18.54	18.62	18.69	18.65	18.51	18.65	-0.01	0.93	0.95
CG18319	FBgn0000173	ben	FBgn0000173	1	17.98	17.82	18	17.92	18	17.85	-0.01	0.93	0.95
CG7185	FBgn0035872	Cpsf6	FBgn0035872	10	26.56	26.63	26.44	26.35	26.82	26.42	-0.01	0.93	0.95
CG11859	FBgn0039306	RIOK2	FBgn0039306	1	18.01	18.41	18.32	18.14	18.14	18.51	0.02	0.93	0.95
CG7524	FBgn0262733	Src64B	FBgn0262733	11	23.61	23.52	23.56	23.69	23.41	23.6	0.01	0.93	0.95
CG40451	FBgn0263977	Tim17b	FBgn0263977	3	24.22	23.99	24.05	24.05	24.07	24.16	0.01	0.93	0.95
CG16941	FBgn0266917	Sf3a1	FBgn0266917	1	18.39	17.69	18.44	18.2	18.3	18.06	0.02	0.94	0.96
CG8014	FBgn0015477	Rme-8	FBgn0015477	5	19.36	19.47	19.65	19.6	19.4	19.47	-0.01	0.94	0.96
CG9422	FBgn0033092	CG9422	FBgn0033092	1	18.21	18.36	18.23	18.17	18.28	18.32	-0.01	0.94	0.96
CG9267	FBgn0032524	Hacd2	FBgn0032524	1	17.84	17.94	18.13	18.38	17.69	17.88	0.02	0.94	0.96
CG2158	FBgn0033264	Nup50	FBgn0033264	3	19.82	20.01	19.85	19.91	19.98	19.77	-0.01	0.95	0.96
CG8683	FBgn0031985	mon2	FBgn0031985	1	16.78	17.24	17.14	16.89	17.14	17.17	0.01	0.95	0.96
CG6369	FBgn0039260	Smg6	FBgn0039260	1	17.34	16.94	17.18	17.84	16.1	17.44	-0.03	0.95	0.97
CG16916	FBgn0028686	Rpt3	FBgn0028686	14	24.66	24.75	24.71	24.81	24.64	24.67	0	0.95	0.97
CG13151	FBgn0033750	CG13151	FBgn0033750	1	18.44	18.22	18.63	18.54	18.07	18.65	-0.01	0.95	0.97
CG10990	FBgn0030520	Pdcd4	FBgn0030520	4	23	22.83	22.66	22.91	22.77	22.84	0.01	0.95	0.97
CG3356	FBgn0034989	CG3356	FBgn0034989	2	19.02	18.18	19.53	19.43	18.53	18.71	-0.02	0.96	0.97
CG1258	FBgn0011692	pav	FBgn0011692	4	20.95	20.91	20.86	20.88	21.01	20.85	0	0.96	0.97
[truncated: 26 more rows]
