# Supplementary material for: Dimerisation of the PICTS complex via LC8/Cut-up drives co-transcriptional transposon silencing in Drosophila
Source: eLife. 2021 Feb 4;10:e65557. doi: 10.7554/eLife.65557 (PMC7861614; doi:10.7554/eLife.65557)
Supplement: Supplementary file 1. — The sequence of each TQT motif was identified using LC8Pred and is shown alongside gene names, number of motifs per protein and the corresponding LC8Pred amino acid score. Both TQT motifs in Panx are highlighted in green. [file elife-65557-supp1.xlsx]

## Sheet: TQT motifs
Gene	CG number	log2FC >2 and p<0.01	# of TQT	TQT Motif Sequence	LC8Pred Amino Acid Score
alt	CG18212	yes	2	VTKTTNTL	12.99
alt	CG18212	yes	2	SHKSTQSS	12.93
ana2	CG8262	yes	2	ICAGTQTD	20.12
ana2	CG8262	yes	2	STTGTQCD	19.7
asciz	CG14962	yes	7	RDIETQTP	26.65
asciz	CG14962	yes	7	LDMETQTE	22.62
asciz	CG14962	yes	7	NTQHTQTC	17.47
asciz	CG14962	yes	7	AHMYTQTC	19.15
asciz	CG14962	yes	7	TGDIGTMTD	14.07
asciz	CG14962	yes	7	QSTCTQTR	16.02
asciz	CG14962	yes	7	SHIQTQTH	14.4
Atg17	CG1347	yes	1	LSAGTLTE	13.38
Cen	CG1962	yes	2	SNKSTQTD	23.43
Cen	CG1962	yes	2	KTLTTNTE	12.85
CG11125	CG11125	yes	1	TSIAIQTE	14.98
CG33213	CG33213	yes	2	RERAIQTE	16.04
CG33213	CG33213	yes	2	KDAGIQCR	13.79
CG6654	CG6654	yes	1	CTASVQTD	21.2
cmet	CG6392	yes	1	VAAQTQTE	17.35
Coop	CG1621	yes	1	TDVATNTD	14.54
corn	CG42278	yes	1	RNQSTQAE	12.75
Dlip1	CG15367	yes	1	SHTQTQTH	12.73
dup	CG8171	yes	1	TSTAIQTS	12.25
egl	CG4051	yes	2	QTQQVQTQ	16.09
egl	CG4051	yes	2	VDAESQTL	15.84
Fgop2	CG10158	yes	1	EEKAVQTD	12.59
geminin	CG3183	yes	1	KDADTQTD	21.79
Hmgcr	CG10367	yes	1	ANASTQTD	21.05
Hmr	CG1619	yes	1	RSTETLTQ	14.79
Kank	CG10249	yes	3	KTIGCQTP	17.27
Kank	CG10249	yes	3	RHTASNTD	14.18
Kank	CG10249	yes	3	KDSGVQTT	15
kibra	CG33967	yes	2	ADKETNTD	20.46
kibra	CG33967	yes	2	VCVASQTD	13.29
Panx	CG9754	yes	2	KNAATQTE	21.21
Panx	CG9754	yes	2	RDAGTQVR	18.41
PI31	CG8979	yes	1	REVTTQTT	14.09
RAF2	CG4877	yes	1	ETVSTQTQ	15.33
ref(2)P	CG10360	yes	1	RHAGVLTQ	12.91
RhoGEF2	CG9635	yes	1	VDSSTQTS	16.88
Shrm	CG34379	yes	1	TDMACQTD	15.28
ssp3	CG18397	yes	1	STQYAQTD	13.03
stwl	CG3836	yes	2	STATTNTI	13.71
stwl	CG3836	yes	2	TERGTQTG	12.5
sw	CG18000	yes	1	YTKQTQTT	20.47
Tlk	CG34412	yes	1	YSKATQTE	19.7
Ulp1	CG12359	yes	1	QNQQTLTE	13.34
wde	CG12340	yes	1	SEKEVQTI	13.76
