# Supplementary material for: Dimerisation of the PICTS complex via LC8/Cut-up drives co-transcriptional transposon silencing in Drosophila
Source: eLife. 2021 Feb 4;10:e65557. doi: 10.7554/eLife.65557 (PMC7861614; doi:10.7554/eLife.65557)
Supplement: Supplementary file 2. — PanxTQT#1 refers to the construct in which the first TQT motif is mutated but the second site is intact (and vice versa). [file elife-65557-supp2.xlsx]

## Sheet: Sheet1
Construct	N	Kd (µM)	ΔH (kcal/mol)	TΔS (kcal/mol)	ΔG (kcal/mol)
PanxWT	2	0.1 ± 0.01	-9.8 ± 0.5	-0.2 ± 0.01	-9.6 ± 0.5
PanxTQT#1	1	0.7 ± 0.10	-7.4 ± 0.4	1.2 ± 0.06	-8.6 ± 0.4
PanxTQT#2	1	0.2 ± 0.06	-12 ± 0.6	-2.3 ± 0.10	-9.5 ± 0.5
