# Supplementary material for: Dimerisation of the PICTS complex via LC8/Cut-up drives co-transcriptional transposon silencing in Drosophila
Source: eLife. 2021 Feb 4;10:e65557. doi: 10.7554/eLife.65557 (PMC7861614; doi:10.7554/eLife.65557)
Supplement: Supplementary file 3. [file elife-65557-supp3.xlsx]

## Sheet: qPCR primers
Oligo Name	DNA Sequence (5'-3')	Use
rp49_fwd	GTCGGATCGATATGCTAAGCTG	qPCR
rp49_rev	CAGATACTGTCCCTTGAAGCG	qPCR
act5c_fwd	TGTGTGACGAAGAAGTTGCTGCT	qPCR
act5c_rev	ATCACCCACGTACGAGTCCTTCT	qPCR
HeTA_fwd	CGCGCGGAACCCATCTTCAGA	qPCR
HeTA_rev	CGCCGCAGTCGTTTGGTGAGT	qPCR
burdock_fwd	ACCCCAGTCAGACATTGCAACAA	qPCR
burdock_rev	GCGGTGCCCTCATCTATCACAAT	qPCR
gypsy_fwd	AGAAAGTCGCCGTCTACCCTGTA	qPCR
gypsy_rev	GTGTGACATTGAGCAGCGTTTCC	qPCR
mdg1_fwd	TATACGAACACTCCACCACCCCA	qPCR
mdg1_rev	GGCTTTTCGGATTGGGAGTTGGA	qPCR
zsgreen_spliced_fwd	CTACTTCAAGAACTCCTGCCCCG	qPCR
zsgreen_spliced_rev	GGTACATGCAGTTCTCCTCCACG	qPCR
zsgreen_nascent_fwd	GCAGCAGCAAGTACAAGCAAAAAG	qPCR
zsgreen_nascent_rev	TGGCCGAACAAAGACCTTGAAATG	qPCR

## Sheet: siRNAs
Oligo Name	RNA Sequence (5'-3')	Use
siGFP_passenger	rArGrCrUrGrGrArGrUrArCrArArCrUrArCrArArCrA	knockdown
siGFP_guide	rUrUrGrUrArGrUrUrGrUrArCrUrCrCrArGrCrUrUrG	knockdown
siPanx_2_passenger	rCrGrGrCrUrArCrGrCrUrGrUrArCrArArGrArArUrU	knockdown
siPanx_2_guide	rUrUrCrUrUrGrUrArCrArGrCrGrUrArGrCrCrGrUrU	knockdown
siNxf2_passenger	rGrGrUrArCrUrUrCrArCrGrGrArArArUrArArArCrU	knockdown
siNxf2_guide	rUrUrUrArUrUrUrCrCrGrUrGrArArGrUrArCrCrArG	knockdown
siCtp_passenger	rArCrUrGrUrUrUrArArGrArGrCrGrGrUrUrArArArG	knockdown
siCtp_guide	rUrUrArArCrCrGrCrUrCrUrUrArArArCrArGrUrArA	knockdown
siPanx_1_passenger	rCrGrArUrGrArArGrCrUrArGrArGrGrUrCrArArArG	rescue experiment
siPanx_1_guide	rUrUrGrArCrCrUrCrUrArGrCrUrUrCrArUrCrGrGrA	rescue experiment

## Sheet: fly stocks
Genotype	Gene	source	info
y[1] v[1]; P{y[+t7.7] v[+t1.8]=TRiP.HMS00004}attP2/TM3, Sb[1]	w	BL 33613 (Bloomington)	RNAi
y[1] sc[*] v[1] sev[21]; P{y[+t7.7] v[+t1.8]=TRiP.HMS02760}attP2	ctp	BL 44044 (Bloomington)	RNAi
y[1] sc[1] v[1]; P{y[+t7.7] v[+t1.8]=UAST::shRNA-panx}attP2/TM6B, Tb[1]	panx	This work	RNAi
P{w[+mC]=UAS-Dcr-2.D}1, w[1118]/Dp(2;Y)G, P{w[+mC]=hs-hid}Y; P{w[+mC]=GAL4-nos.NGT}40	Gal4	Czech et al., 2013	Gal4 driver
w[1118]; P{w[+mC]=GAL4::VP16-nos.UTR}CG6325[MVD1]	Gal4	BL 4937 (Bloomington)	Gal4 driver
w[*]; If/CyO; P{w[+]=lacO-nos::GFP-Piwi}attP2/TM3, Ser	GFP	JB 313394 (VDRC)	DNA tethering
w[1118]; If/CyO; P{w[+mC]=GAL4::VP16-nos.UTR}CG6325[MVD1], P{w[+]=lacO-nos::GFP-Piwi}attP2/TM6B, Tb[1]		This work	Recombinant
w[*]; P{w[+]=nos::LacI-3xFLAG-Ctp}attP40/SM6a,CyO; MKRS/TM6B, Tb[1]	ctp	This work	DNA tethering
w[*]; P{w[+]=nos::LacI-3xFLAG-Panx}attP40/SM6a,CyO; MKRS/TM6B, Tb[1]	panx	This work	DNA tethering
w[1118]	w	Cambridge Fly Facility	control
