# Supplementary material for: Dimerisation of the PICTS complex via LC8/Cut-up drives co-transcriptional transposon silencing in Drosophila
Source: eLife. 2021 Feb 4;10:e65557. doi: 10.7554/eLife.65557 (PMC7861614; doi:10.7554/eLife.65557)
Supplement: Supplementary file 4. [file elife-65557-supp4.xlsx]

## Sheet: ChIP-seq
Sample	Total number of reads	Filtered reads	Uniquely mapped reads	%	Multi-mapping reads	%	PCR duplicates	Read length	Library type	GEO Accession
OSC input si-ctp rep1	39741127	39731590	25844905	0.650488	7263666	0.182818	8987262	50 nts	Single-end	GSM4880468
OSC input si-ctp rep2	36392751	36382296	23846663	0.655447	6498377	0.178614	7648462	50 nts	Single-end	GSM4880469
OSC input si-gfp rep1	36385042	36377064	23743912	0.652717	6604982	0.18157	7289422	50 nts	Single-end	GSM4880470
OSC input si-gfp rep2	33625544	33616302	22057890	0.656166	6015742	0.178953	6849960	50 nts	Single-end	GSM4880471
OSC H3K4me2 si-ctp rep1	24630308	24611965	18469613	0.750432	2358307	0.0958195	6879707	50 nts	Single-end	GSM4880472
OSC H3K4me2 si-ctp rep2	33854498	33836644	25390247	0.750377	3287046	0.0971446	9980214	50 nts	Single-end	GSM4880473
OSC H3K4me2 si-gfp rep1	24908941	24897149	19819963	0.796074	2054809	0.0825319	8740636	50 nts	Single-end	GSM4880474
OSC H3K4me2 si-gfp rep2	26983538	26966684	21441410	0.795107	2222411	0.0824132	9887712	50 nts	Single-end	GSM4880475
OSC H3K9me3 si-ctp rep1	28071160	28048767	8888950	0.316911	9575461	0.341386	6780035	50 nts	Single-end	GSM4880476
OSC H3K9me3 si-ctp rep2	29420491	29408941	9157528	0.311386	10351242	0.351976	7156375	50 nts	Single-end	GSM4880477
OSC H3K9me3 si-gfp rep1	28824921	28812906	7258101	0.251905	9535057	0.33093	6611070	50 nts	Single-end	GSM4880478
OSC H3K9me3 si-gfp rep2	24027121	24013723	6082530	0.253294	7799993	0.324814	5179777	50 nts	Single-end	GSM4880479
S2 input egg rep1	19922726	17609920	12249764	0.695617	2310068	0.13118	1255287	2x50 nts	Paired-end	GSM4880480
S2 input egg rep2	24549887	21662984	15116056	0.697783	2749923	0.126941	1595373	2x50 nts	Paired-end	GSM4880481
S2 input panx rep1	29040063	25579520	17650796	0.690036	3448703	0.134823	2211438	2x50 nts	Paired-end	GSM4880482
S2 input panx rep2	26986741	24061889	16750068	0.696124	3178447	0.132095	1818147	2x50 nts	Paired-end	GSM4880483
S2 input ren rep1	21860614	19488734	13490044	0.692197	2565121	0.131621	1361533	2x50 nts	Paired-end	GSM4880484
S2 input ren rep2	32467623	28638510	19799937	0.691375	3785721	0.13219	2479573	2x50 nts	Paired-end	GSM4880485
S2 H3K4me2 egg rep1	26149166	23781757	19709647	0.828772	1011585	0.0425362	1531825	2x50 nts	Paired-end	GSM4880486
S2 H3K4me2 egg rep2	28832662	26250006	21476561	0.818155	1025271	0.0390579	2073230	2x50 nts	Paired-end	GSM4880487
S2 H3K4me2 panx rep1	31422134	28658991	23922612	0.834733	1097108	0.0382815	2171058	2x50 nts	Paired-end	GSM4880488
S2 H3K4me2 panx rep2	26072345	23700734	19866466	0.838222	893661	0.037706	1579763	2x50 nts	Paired-end	GSM4880489
S2 H3K4me2 ren rep1	26697191	24276573	20041092	0.825532	964842	0.0397437	1589166	2x50 nts	Paired-end	GSM4880490
S2 H3K4me2 ren rep2	19217213	17510767	14646944	0.836454	637078	0.0363821	1191888	2x50 nts	Paired-end	GSM4880491
S2 H3K9me3 egg rep1	26985834	23006032	15038914	0.653694	4197965	0.182472	1543987	2x50 nts	Paired-end	GSM4880492
S2 H3K9me3 egg rep2	28080391	24011782	14940095	0.622199	4436345	0.184757	1642705	2x50 nts	Paired-end	GSM4880493
S2 H3K9me3 panx rep1	21530638	17536104	9861981	0.562382	5016489	0.286066	1188751	2x50 nts	Paired-end	GSM4880494
S2 H3K9me3 panx rep2	22865936	18613929	10336989	0.555336	5454835	0.293051	1357676	2x50 nts	Paired-end	GSM4880495
S2 H3K9me3 ren rep1	23564415	19182974	10784056	0.562168	5399371	0.281467	1298490	2x50 nts	Paired-end	GSM4880496
S2 H3K9me3 ren rep2	31537026	25651078	14287715	0.557003	7611755	0.296742	2190333	2x50 nts	Paired-end	GSM4880497

## Sheet: RNA-seq
Sample	Total number of reads	Filtered reads	Uniquely mapped reads	%	Multi-mapping reads	%	Read length	Library type	GEO Accession
ovary sh_ctp rep1	29585676	29571316	27951991	0.94524	1286762	0.0435139	50 nts	Single-end	GSM4880520
ovary sh_ctp rep2	30129857	30087095	28510674	0.947605	1202665	0.0399728	50 nts	Single-end	GSM4880521
ovary sh_ctp rep3	39229053	39193233	37101783	0.946637	1576068	0.0402128	50 nts	Single-end	GSM4880522
ovary sh_ctp rep4	43353085	43287031	41057120	0.948485	1596288	0.0368768	50 nts	Single-end	GSM4880523
ovary sh_panx rep1	39914942	39902534	38073422	0.954161	1412308	0.0353939	50 nts	Single-end	GSM4880524
ovary sh_panx rep2	43883183	43869894	41699520	0.950527	1700837	0.03877	50 nts	Single-end	GSM4880525
ovary sh_panx rep3	39101142	39092368	37214625	0.951967	1462323	0.0374069	50 nts	Single-end	GSM4880526
ovary sh_panx rep4	49290696	49249449	46463715	0.943436	2252581	0.0457382	50 nts	Single-end	GSM4880527
ovary sh_w rep1	36173930	36162477	35205721	0.973543	595253	0.0164605	50 nts	Single-end	GSM4880528
ovary sh_w rep2	38358880	38343057	37226128	0.97087	749600	0.0195498	50 nts	Single-end	GSM4880529
ovary sh_w rep3	34094590	34085488	33129612	0.971957	631580	0.0185293	50 nts	Single-end	GSM4880530
ovary sh_w rep4	41479072	41465821	40310006	0.972126	746070	0.0179924	50 nts	Single-end	GSM4880531
OSC si_ctp rep1	36227581	28787032	15141921	0.525998	6534210	0.226984	50 nts	Single-end	GSM4880532
OSC si_ctp rep2	33454456	31976586	22910527	0.716478	7148203	0.223545	50 nts	Single-end	GSM4880533
OSC si_ctp rep3	44168042	36603785	22710417	0.620439	6417772	0.175331	50 nts	Single-end	GSM4880534
OSC si_ctp rep4	38581592	31099586	18502008	0.594928	5280212	0.169784	50 nts	Single-end	GSM4880535
OSC si_gfp rep1	42601089	41188180	35176382	0.854041	4230341	0.102708	50 nts	Single-end	GSM4880536
OSC si_gfp rep2	40947634	40750688	35150907	0.862584	4991885	0.122498	50 nts	Single-end	GSM4880537
OSC si_gfp rep3	40238739	35597790	27698645	0.7781	3224486	0.0905811	50 nts	Single-end	GSM4880538
OSC si_gfp rep4	44120603	39129232	30261517	0.773374	3769206	0.0963271	50 nts	Single-end	GSM4880539

## Sheet: sRNA-seq
Sample	Total number of reads	Filtered reads	Mapping to transposons	%	Read length	Library type	GEO Accession
OSC siCtp rep1	17899801	6267015	541218	0.0863598	50 nts	Single-end	GSM4880514
OSC siCtp rep2	24994691	9923191	884024	0.0890867	50 nts	Single-end	GSM4880515
OSC siGFP rep1	19654430	7985789	750201	0.093942	50 nts	Single-end	GSM4880516
OSC siGFP rep2	21699979	10844747	1254909	0.115716	50 nts	Single-end	GSM4880517
